# Supplementary material for: Pan-cancer whole genome analyses of metastatic solid tumors
Source: bioRxiv or medRxiv preprint supplement (doi:10.1101/415133), 2019-08-12

# ABL1 Variants

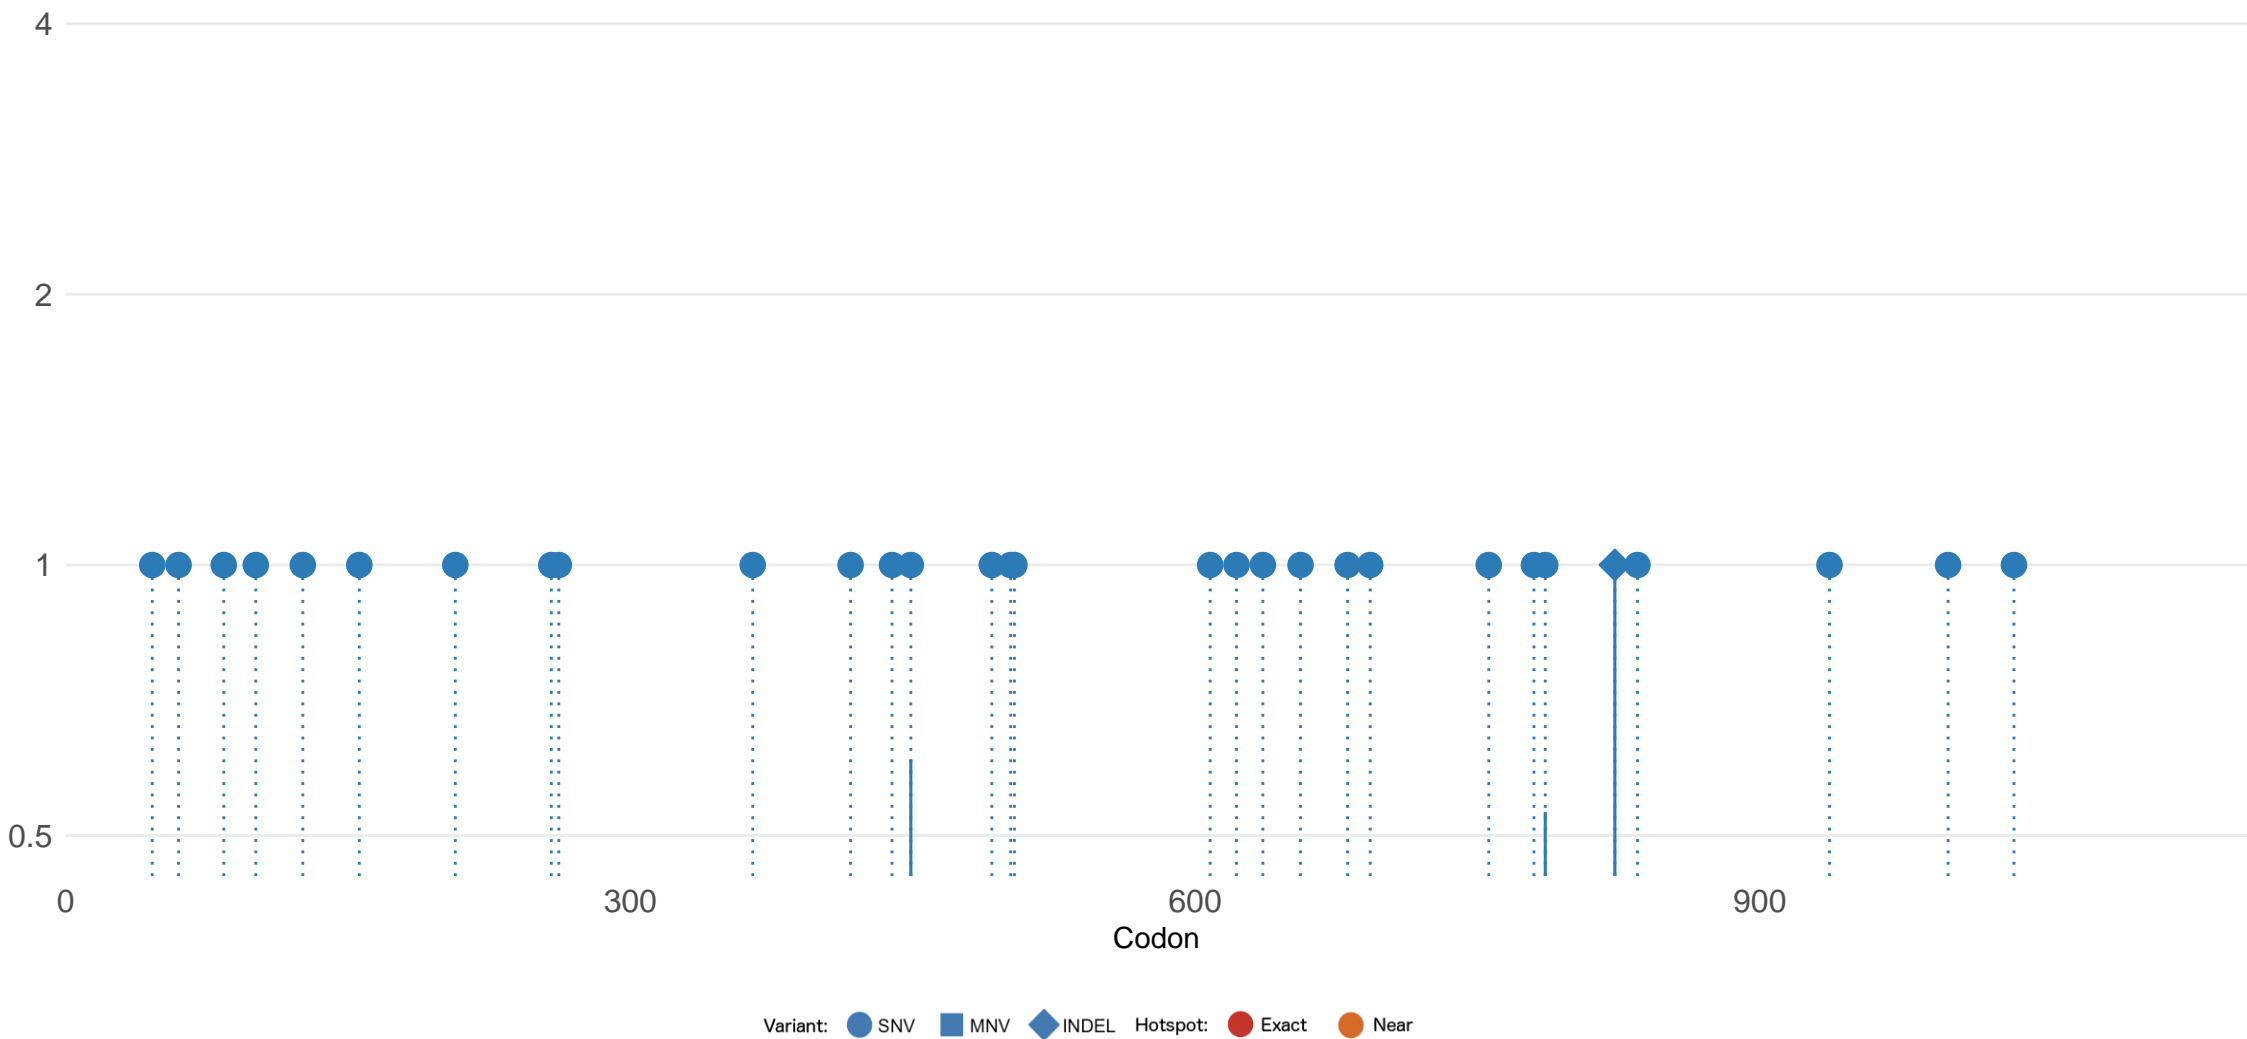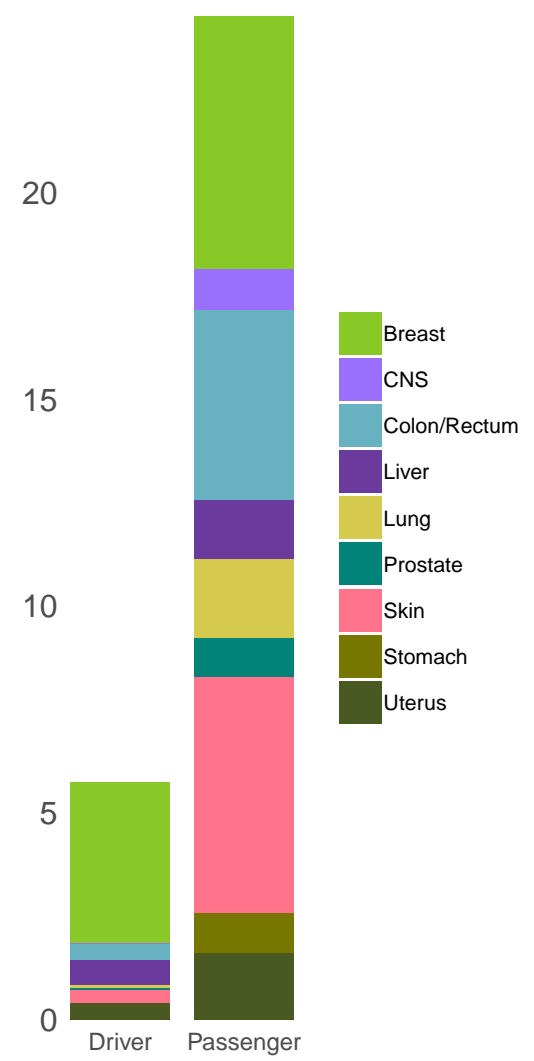

# ACVR1 Variants

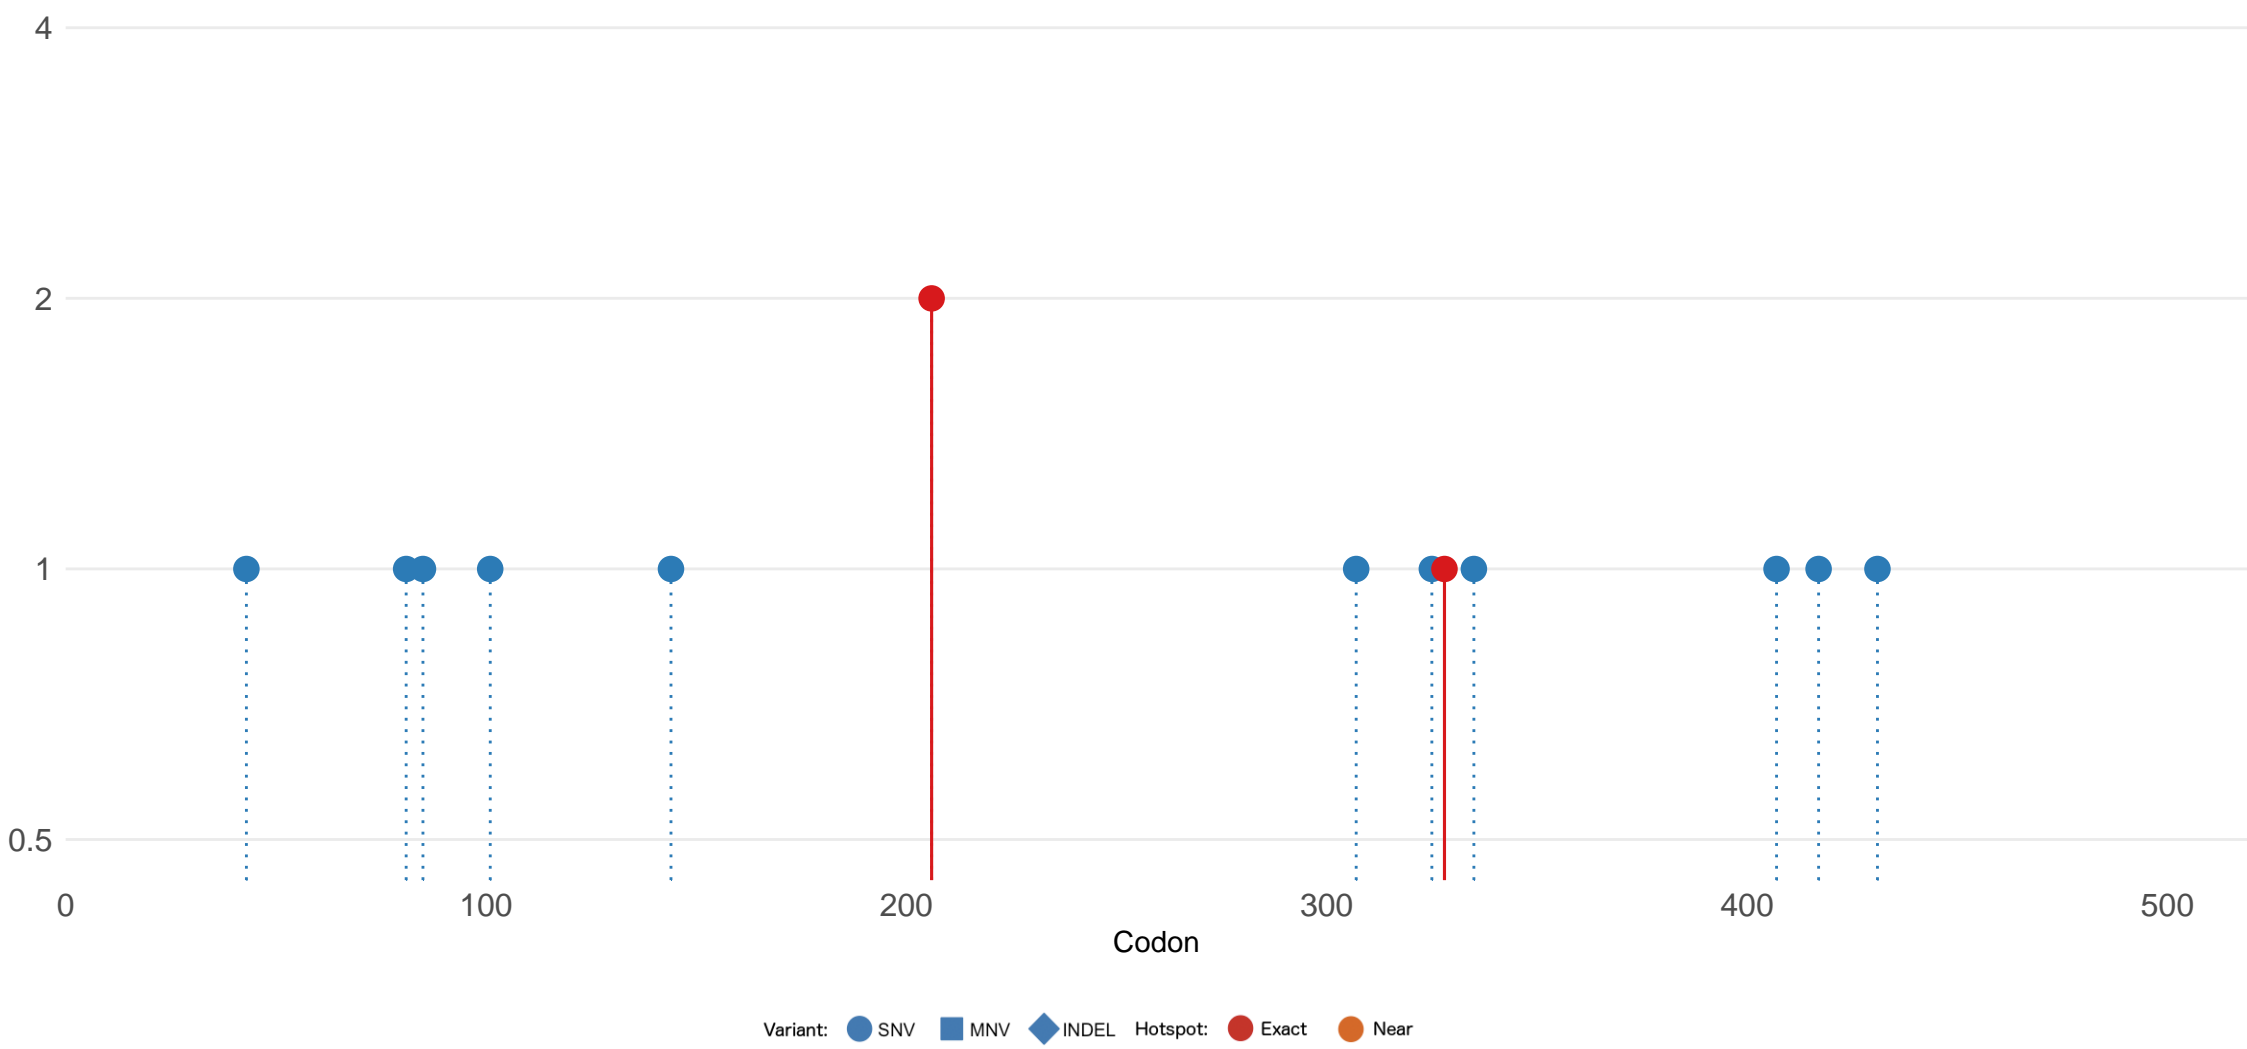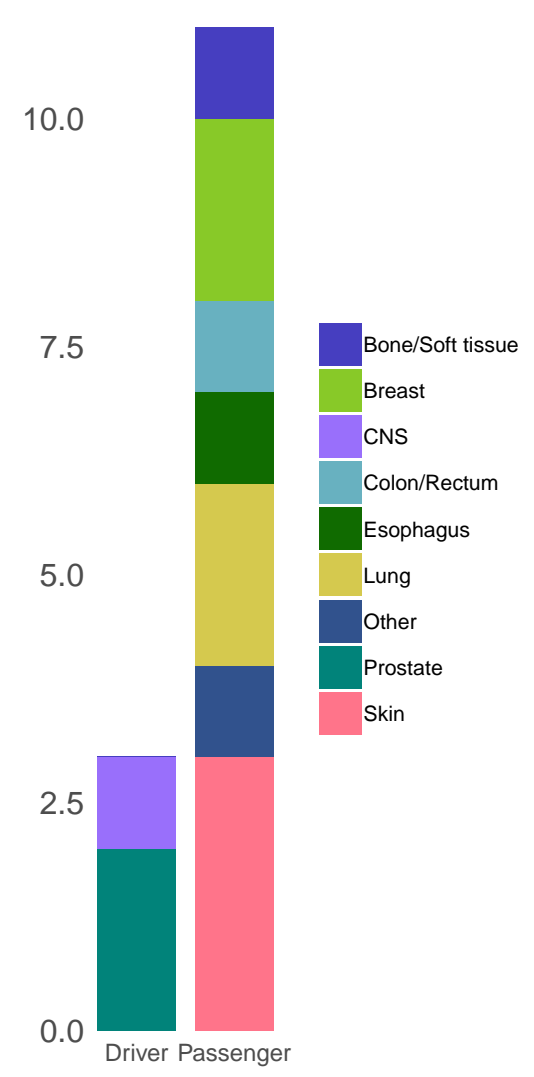

# AKT1 Variants

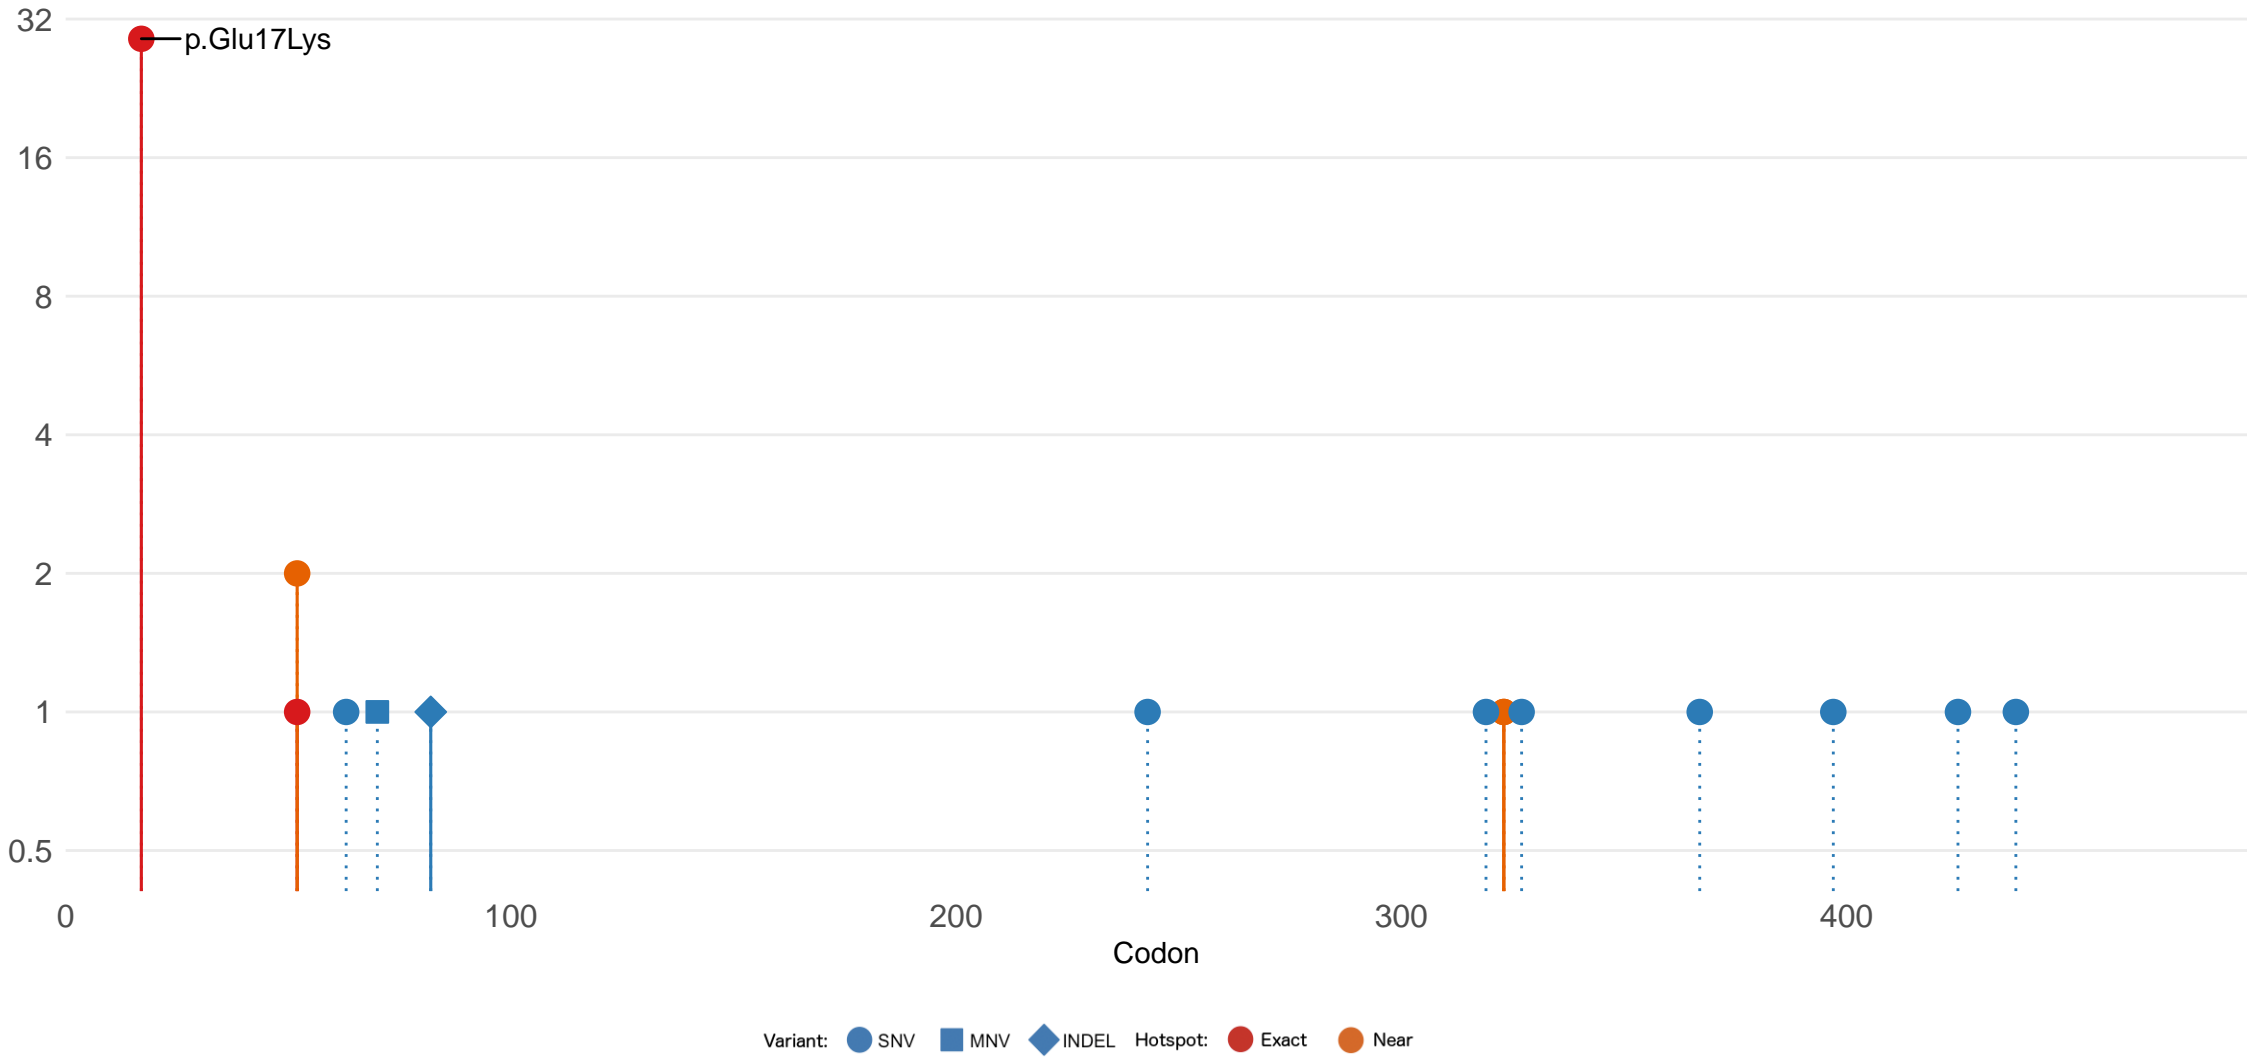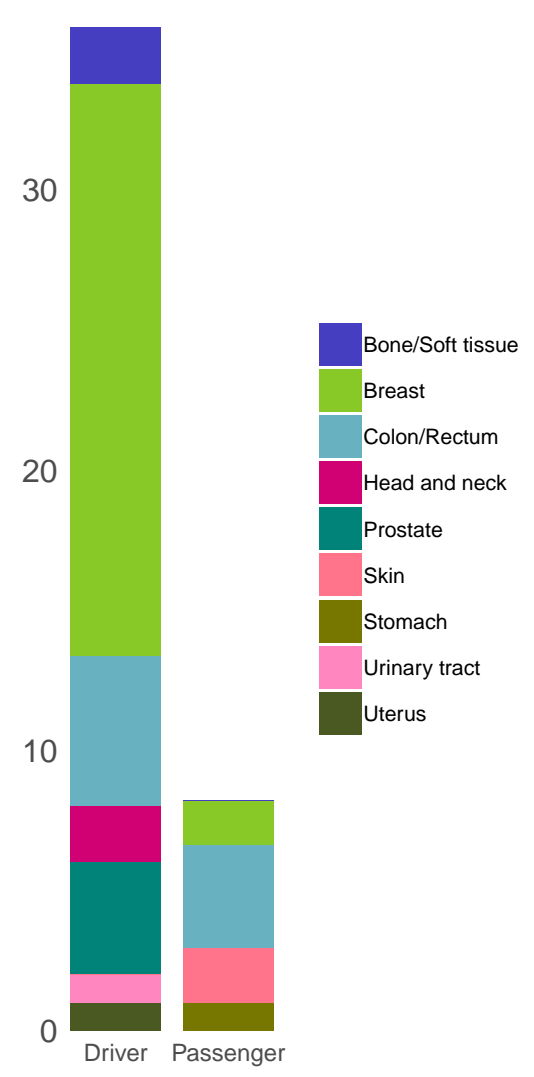

# ALB Variants

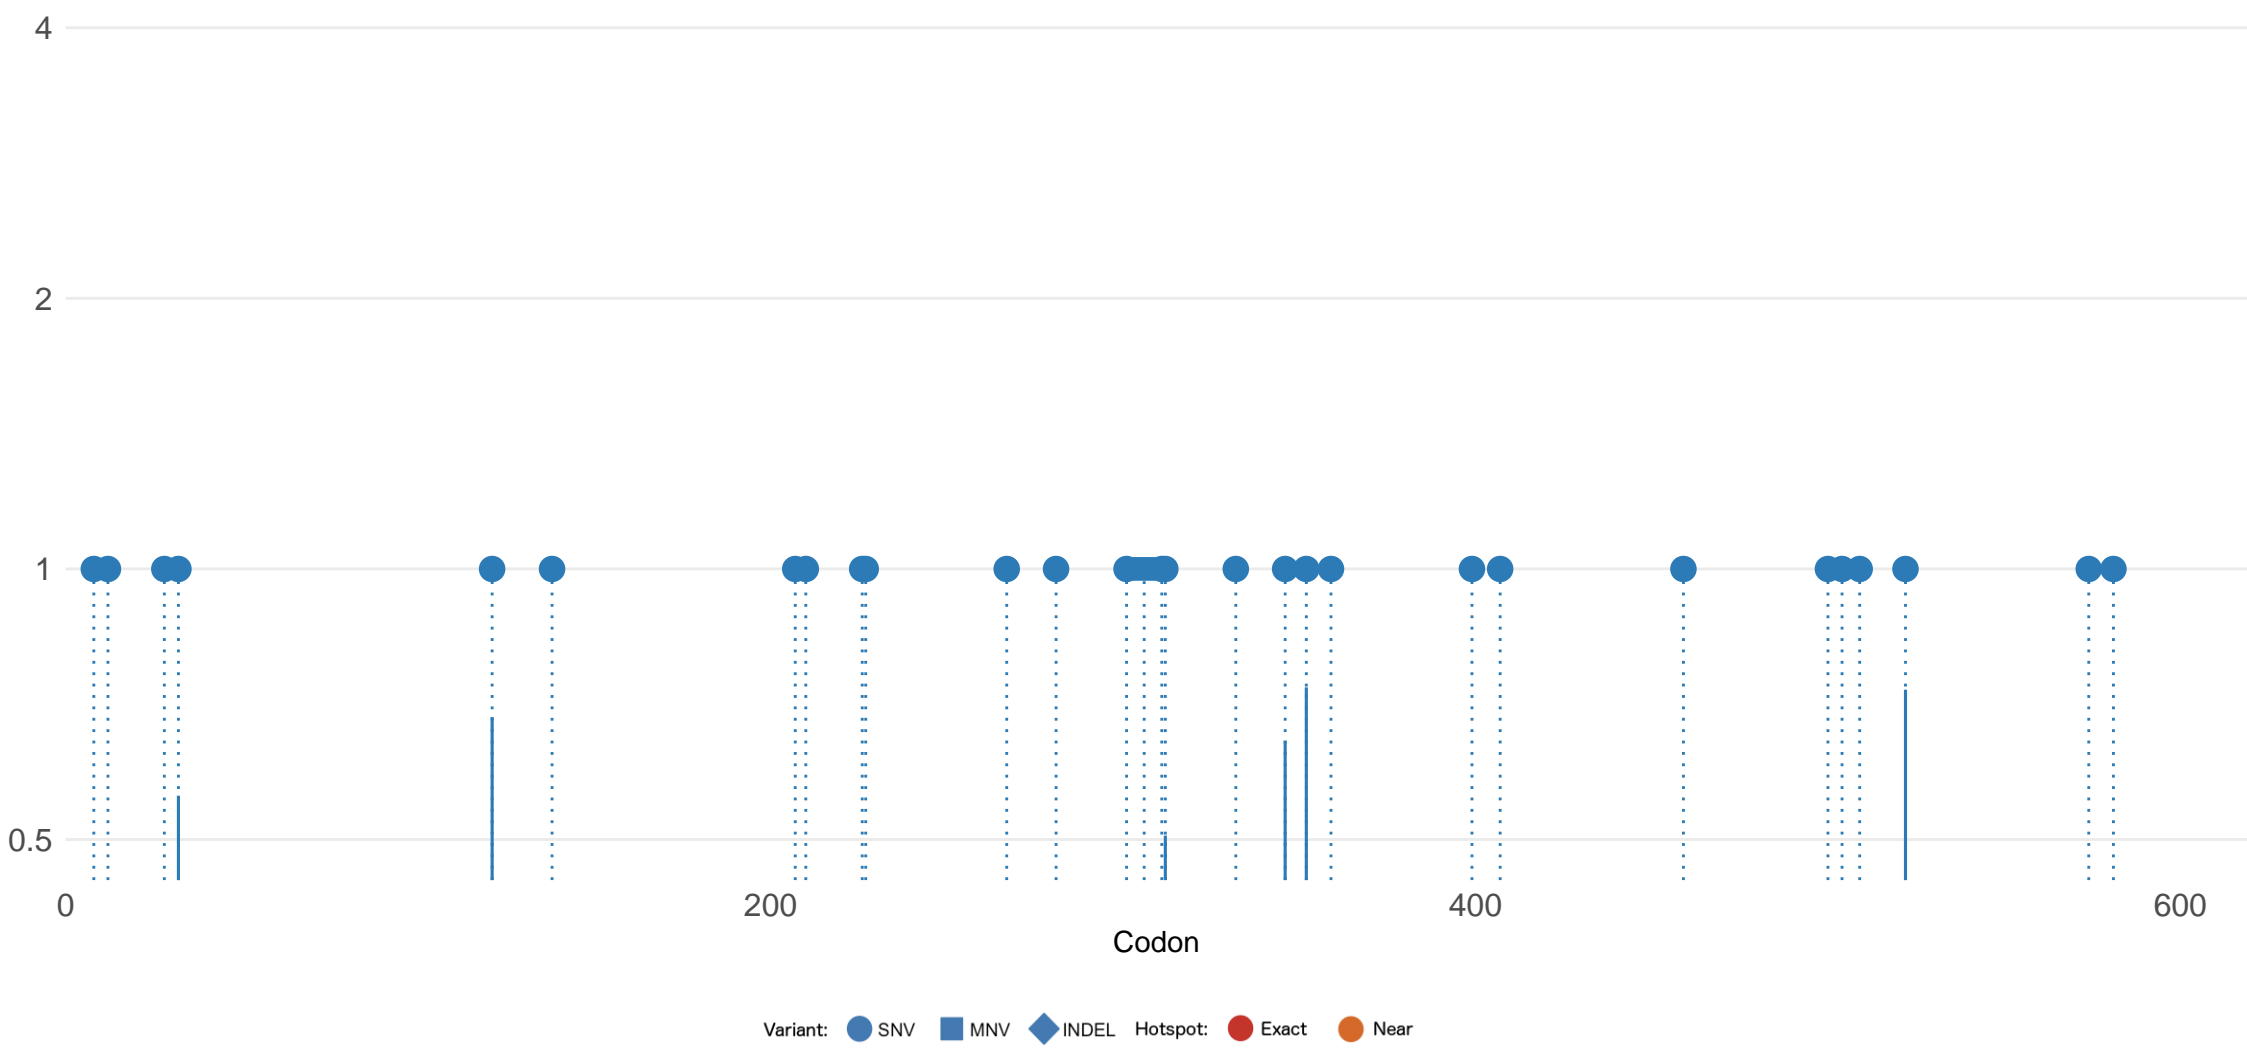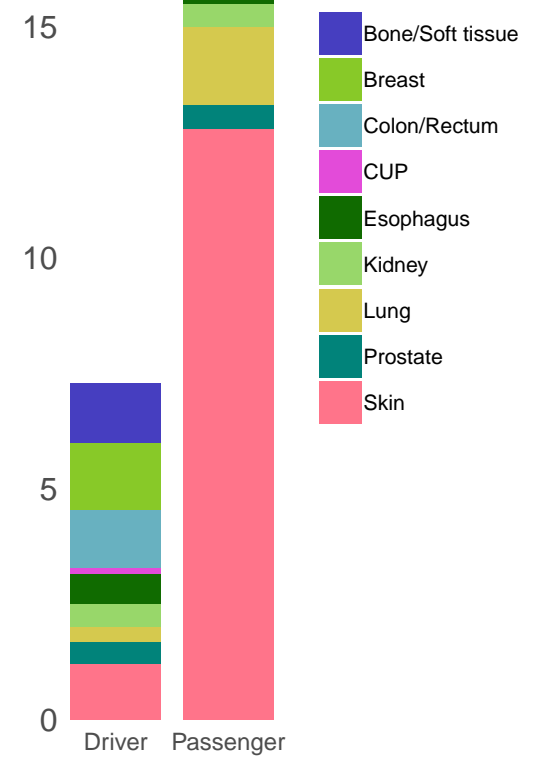

# ALK Variants

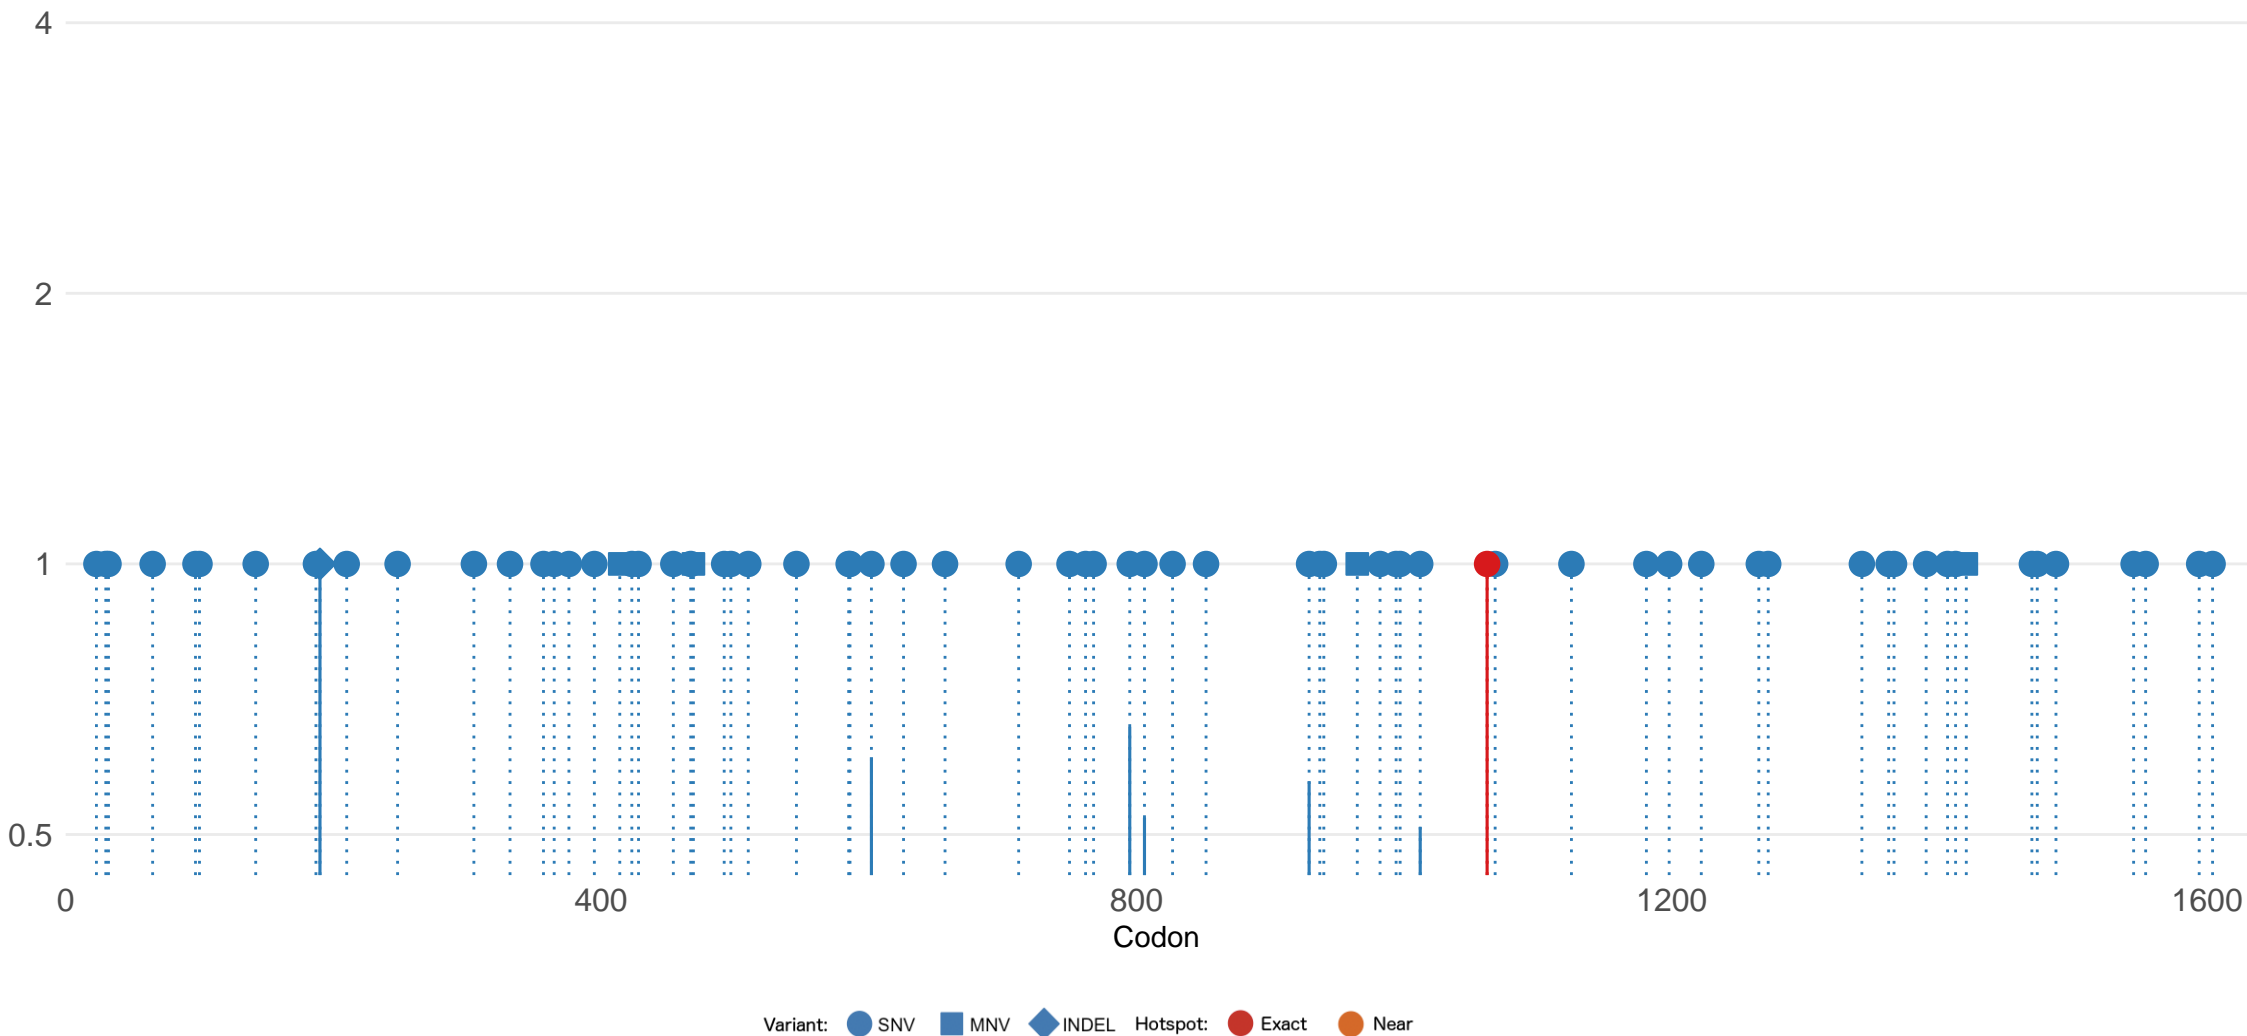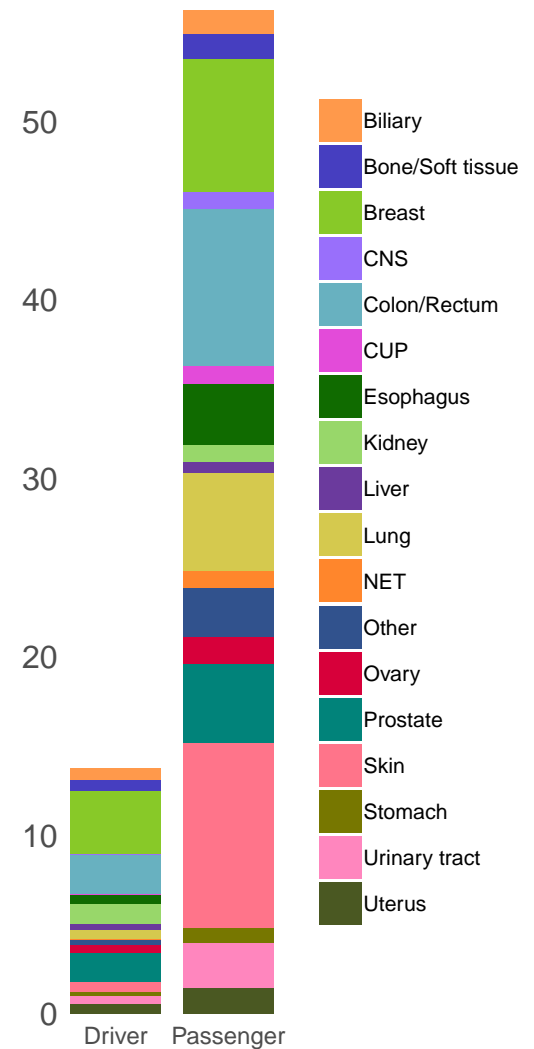

# AR Variants

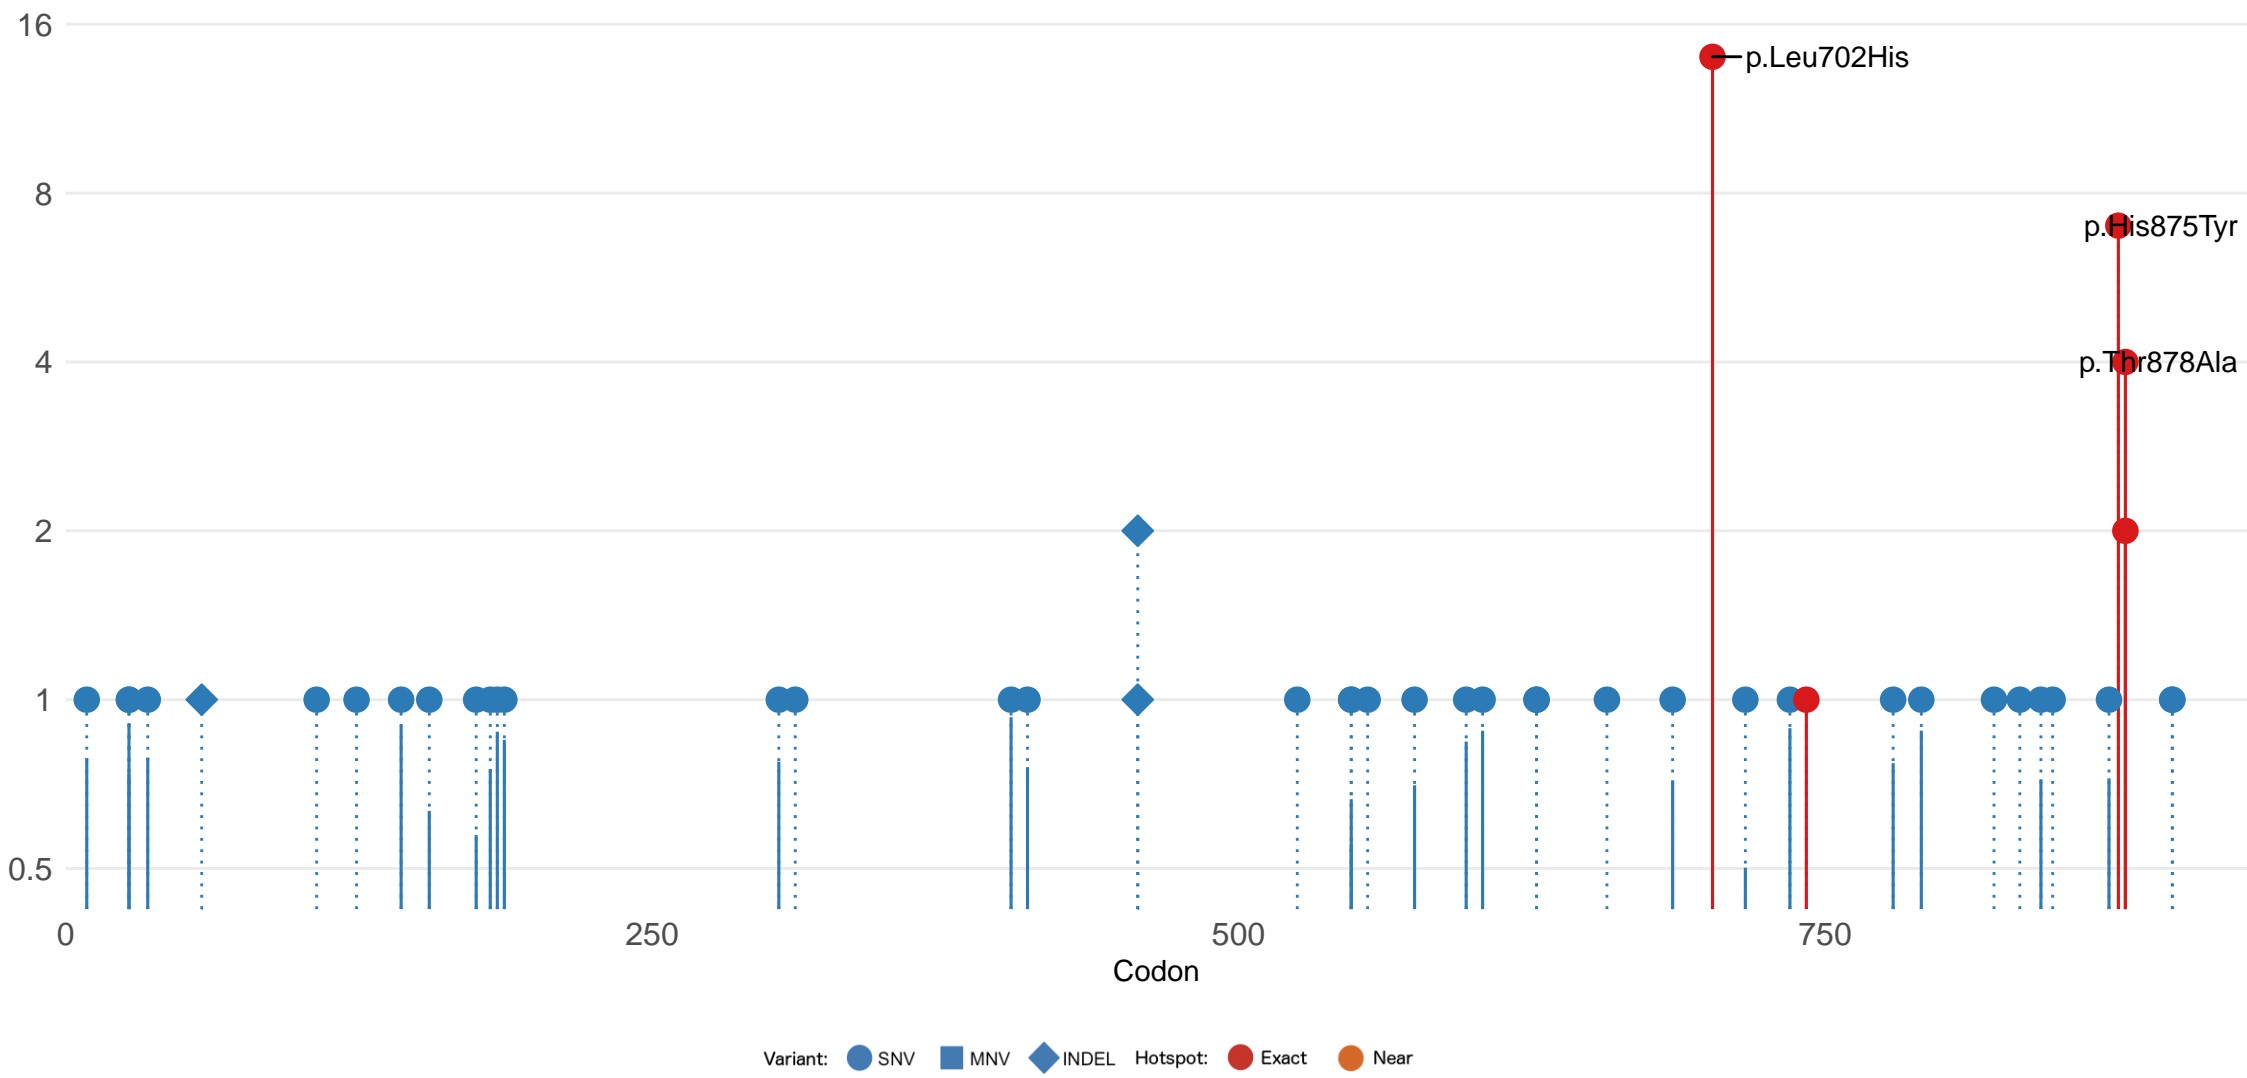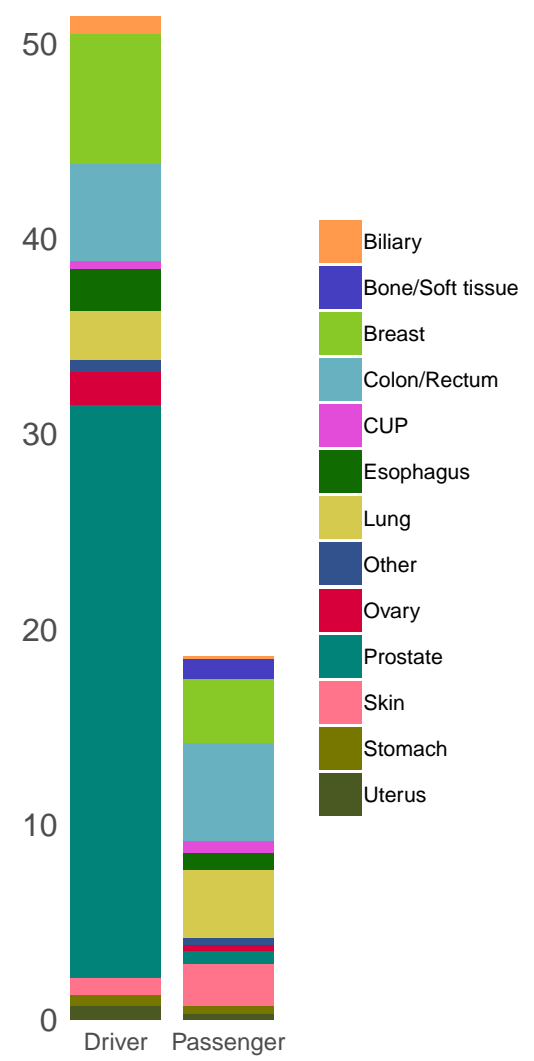

# ARID5B Variants

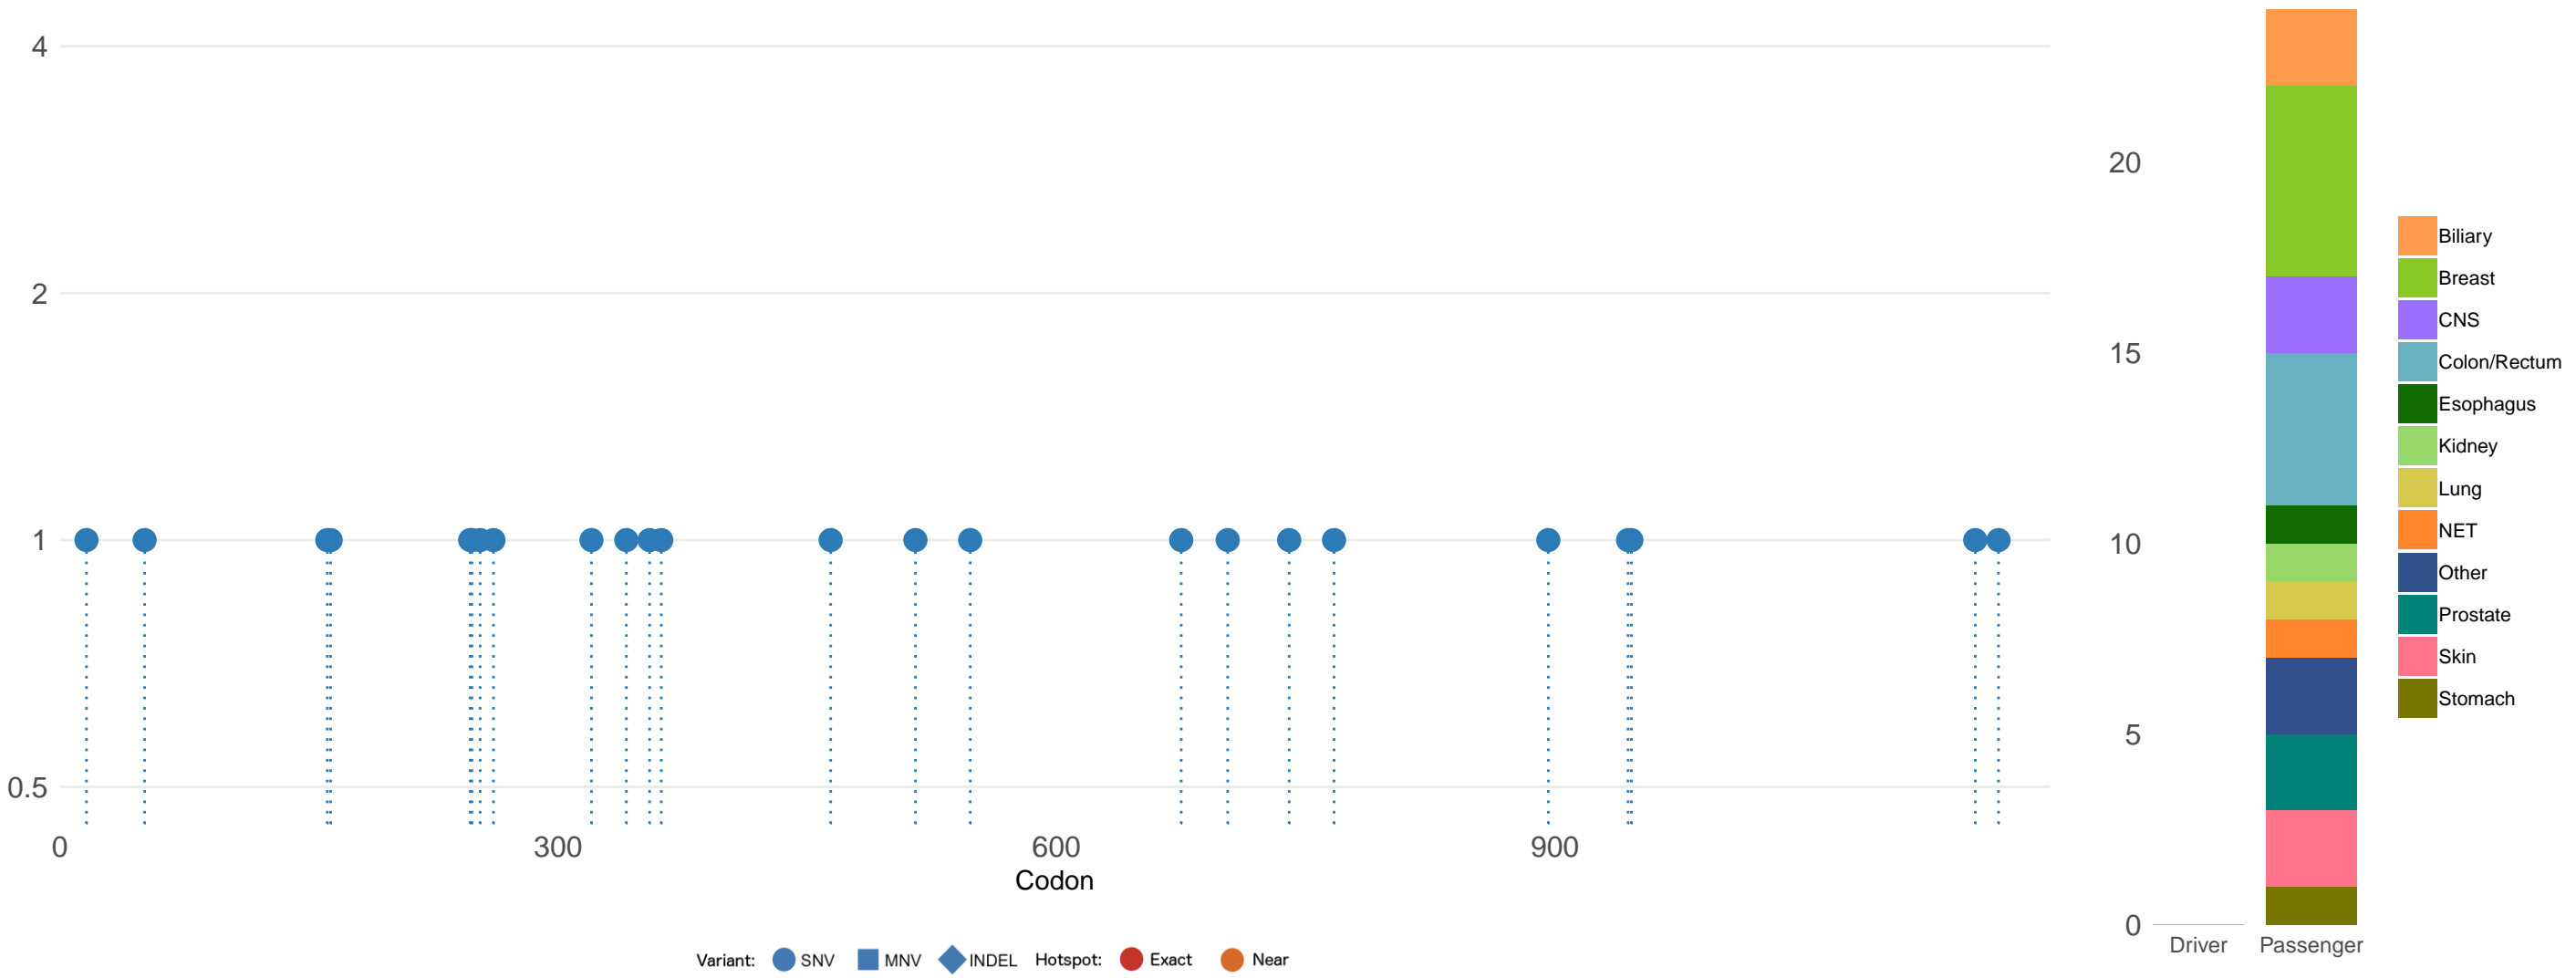

# BIRC3 Variants

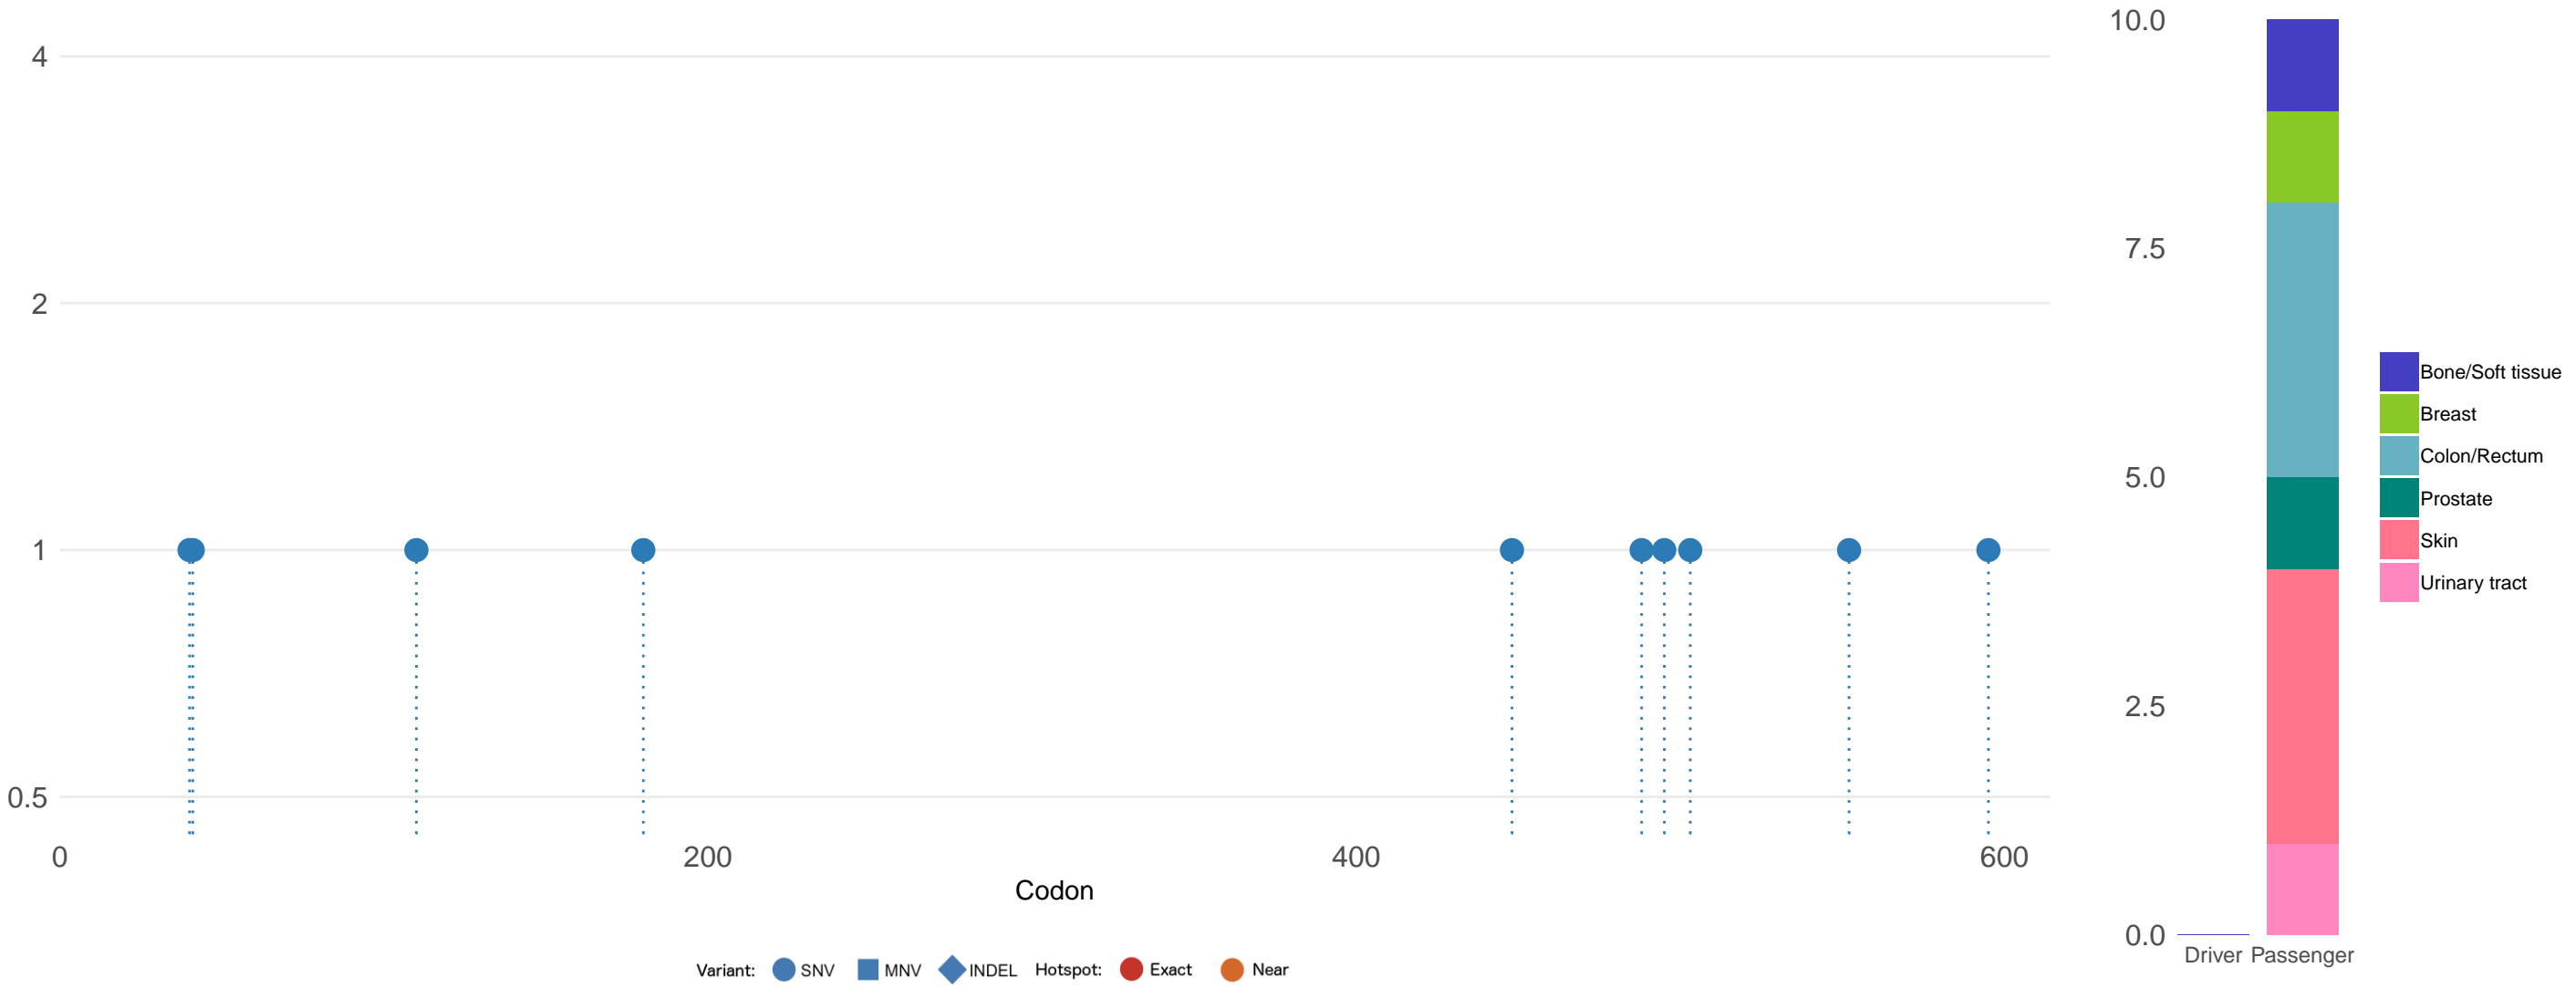



# BRAF Variants

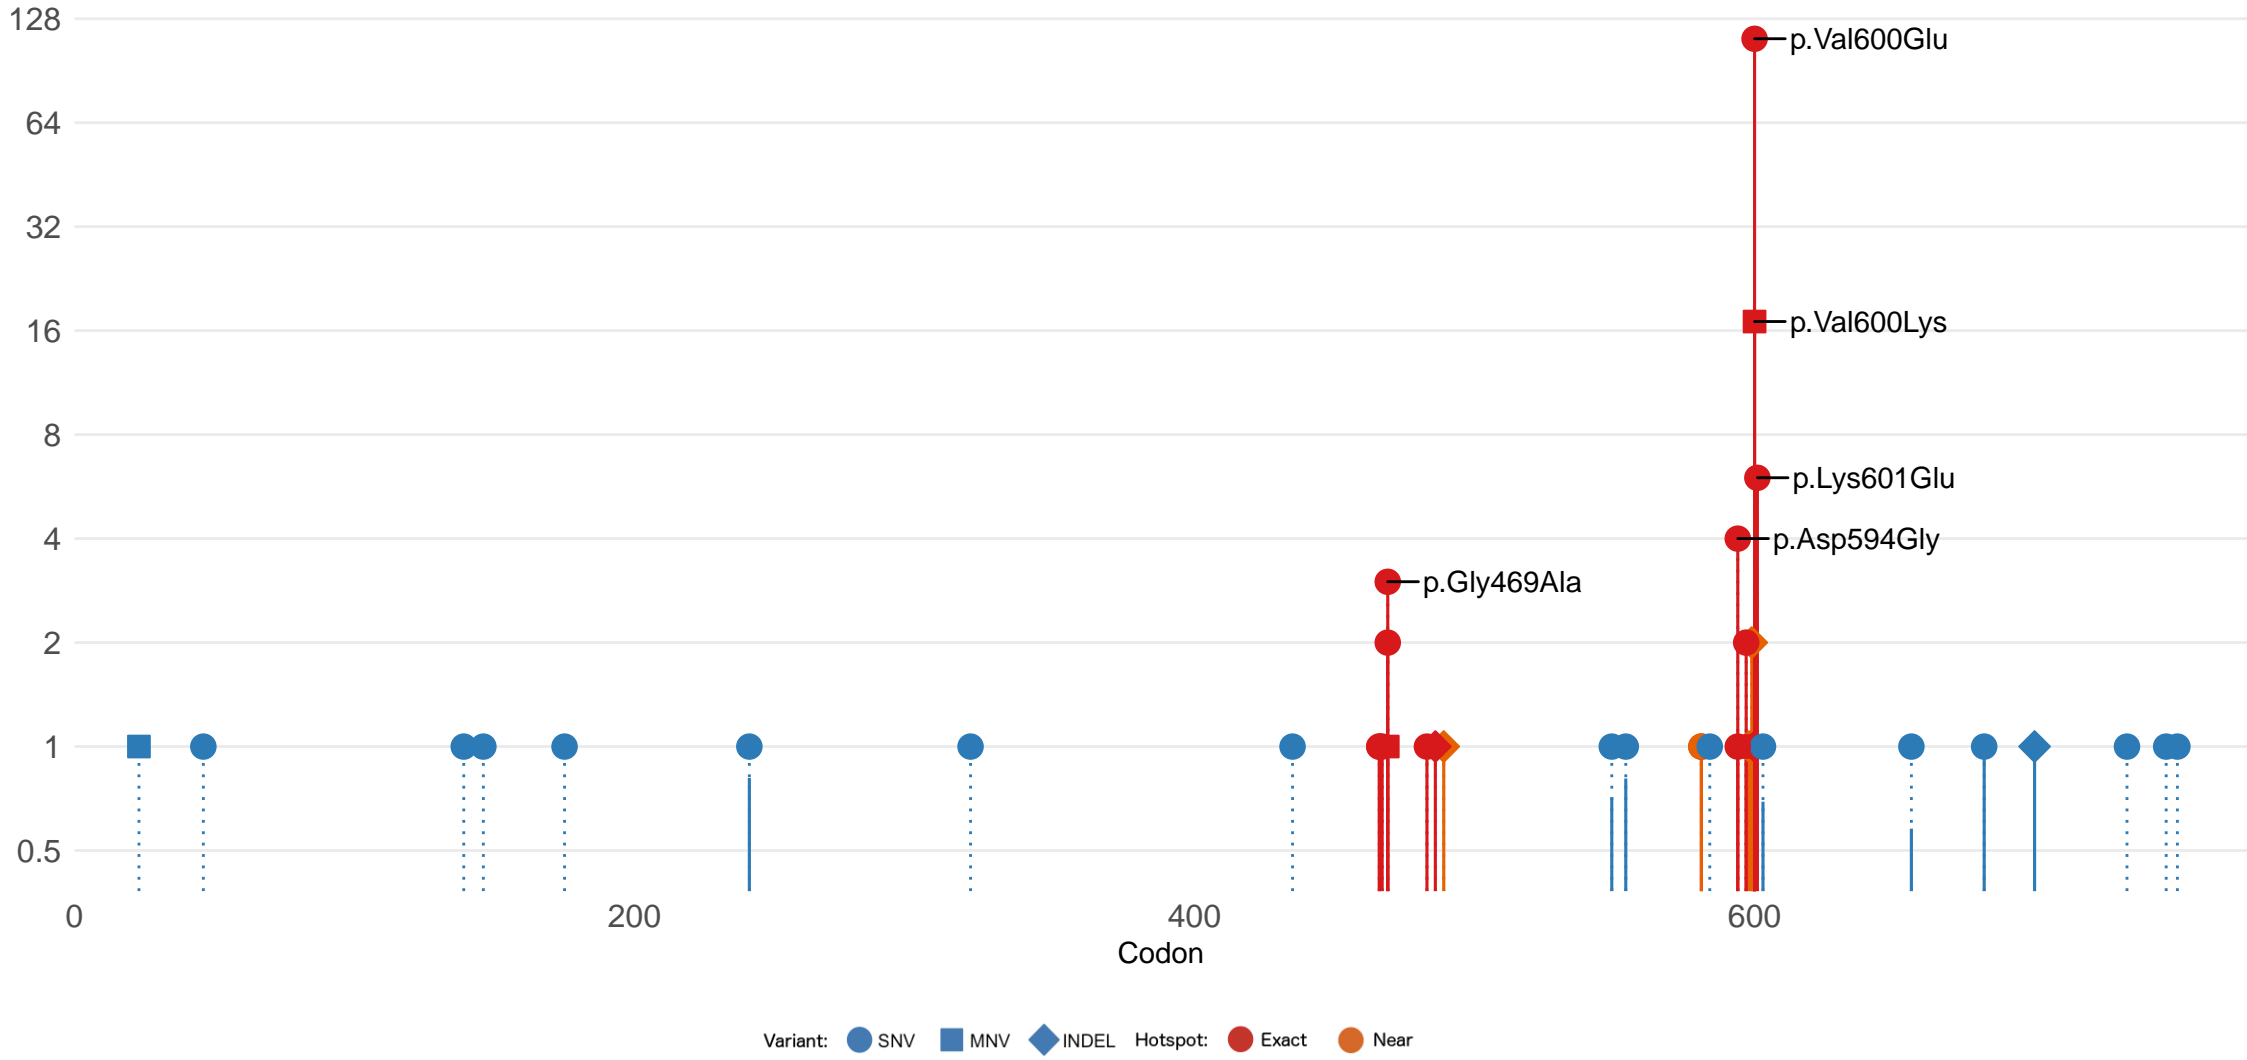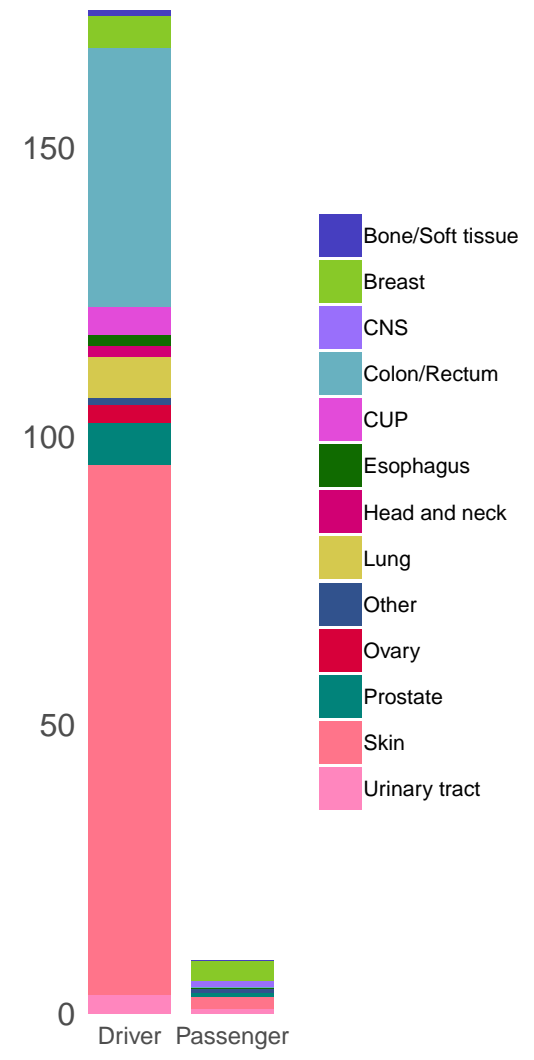

# BTK Variants

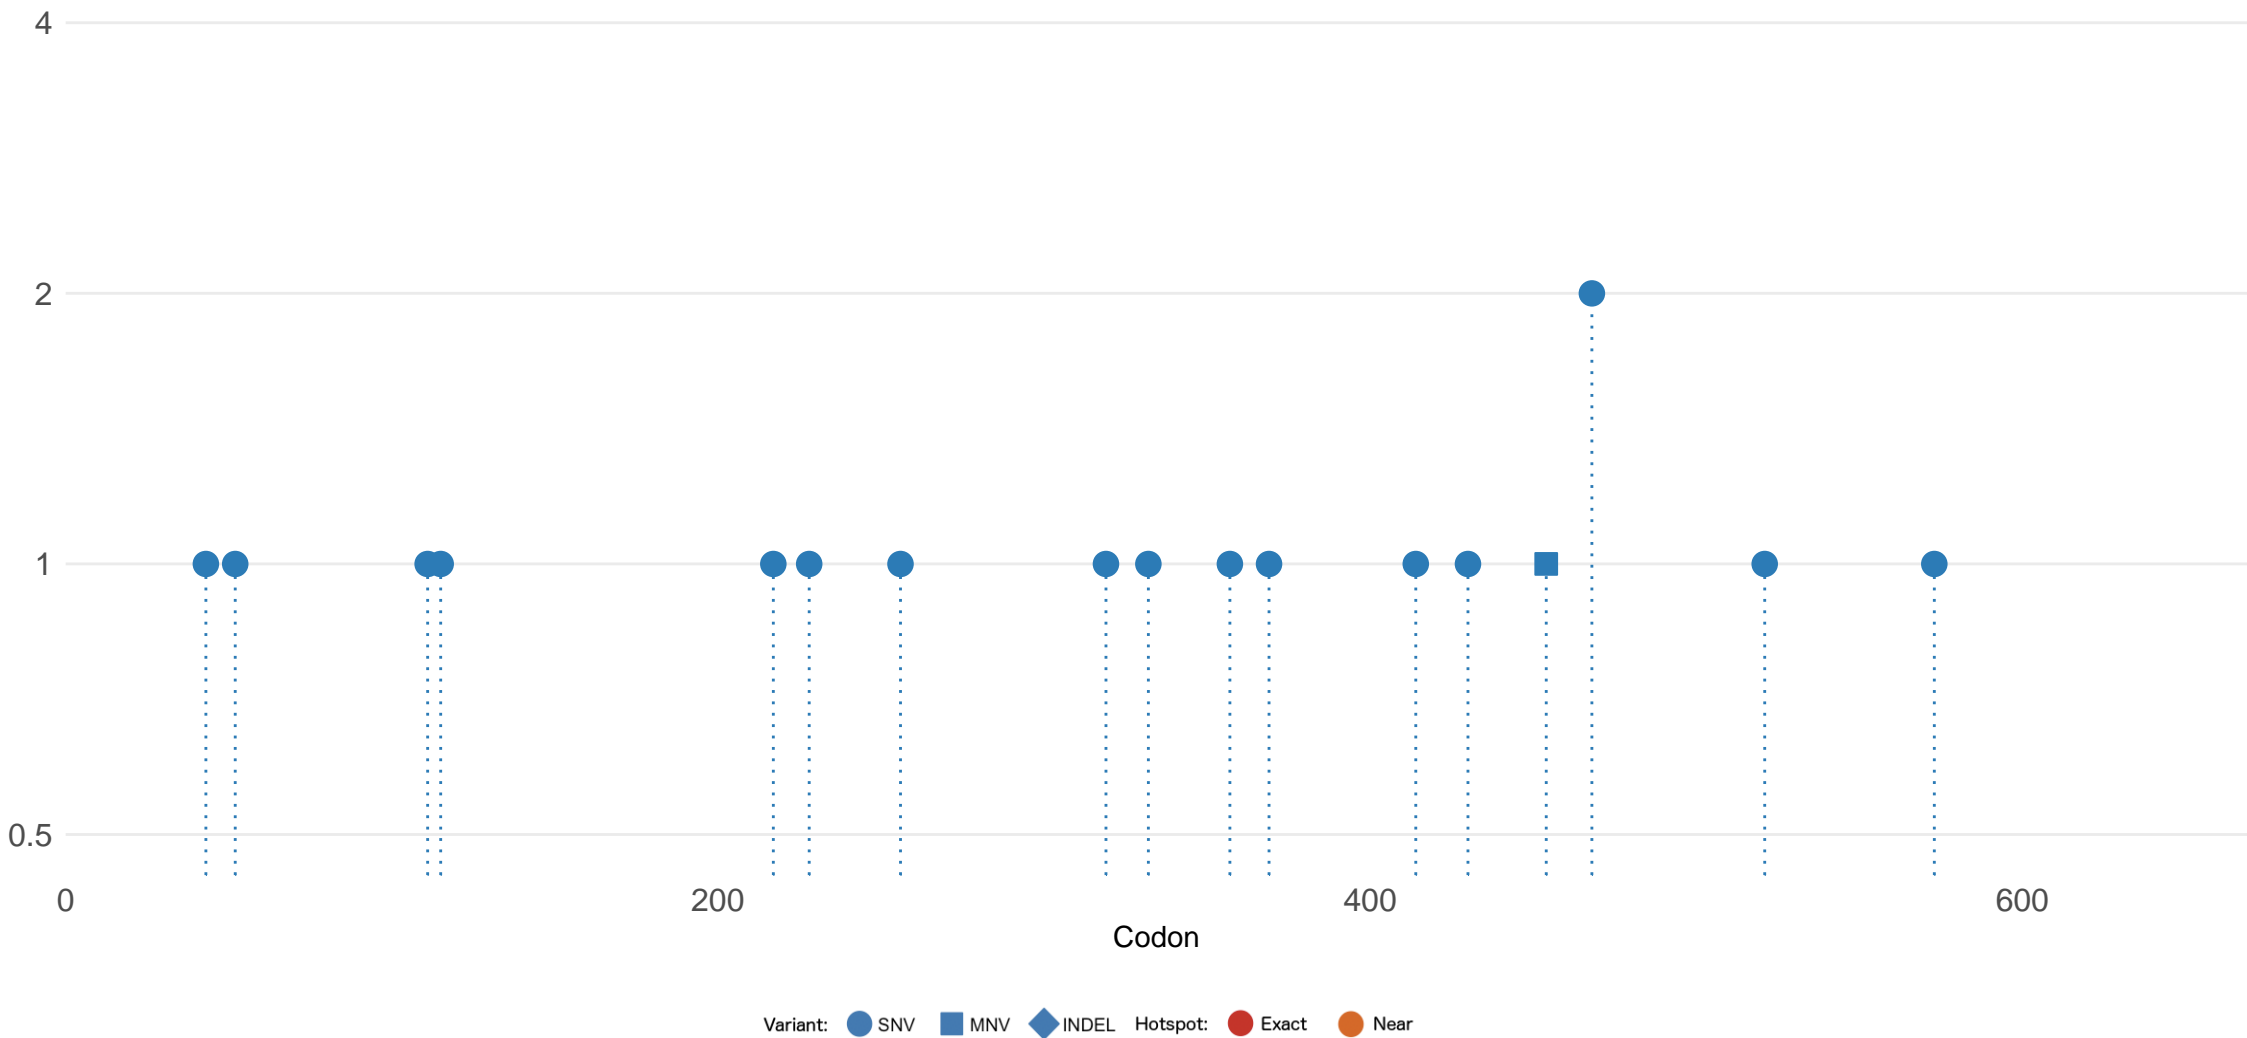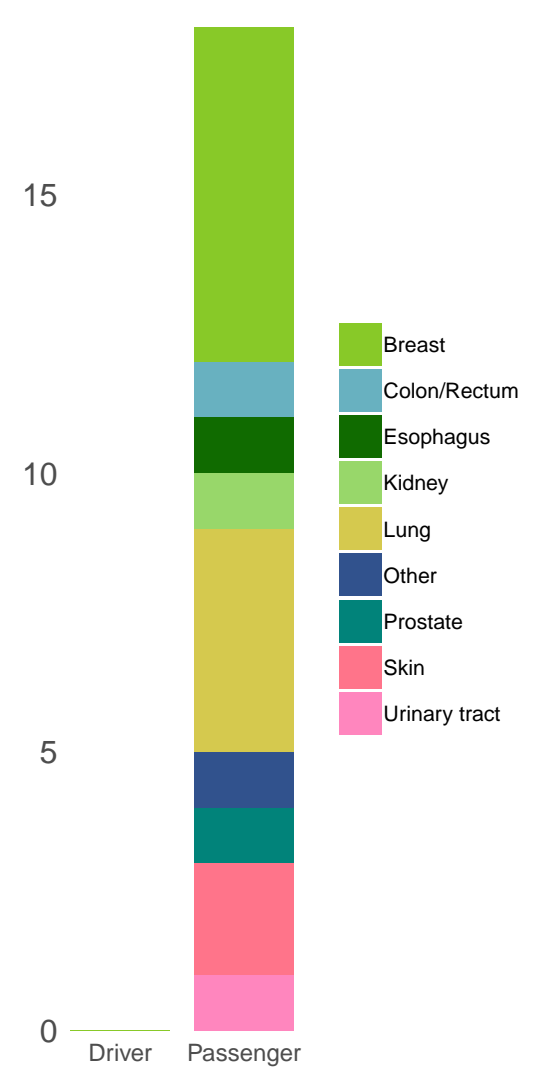

Driver Passenger

# CACNA1D Variants

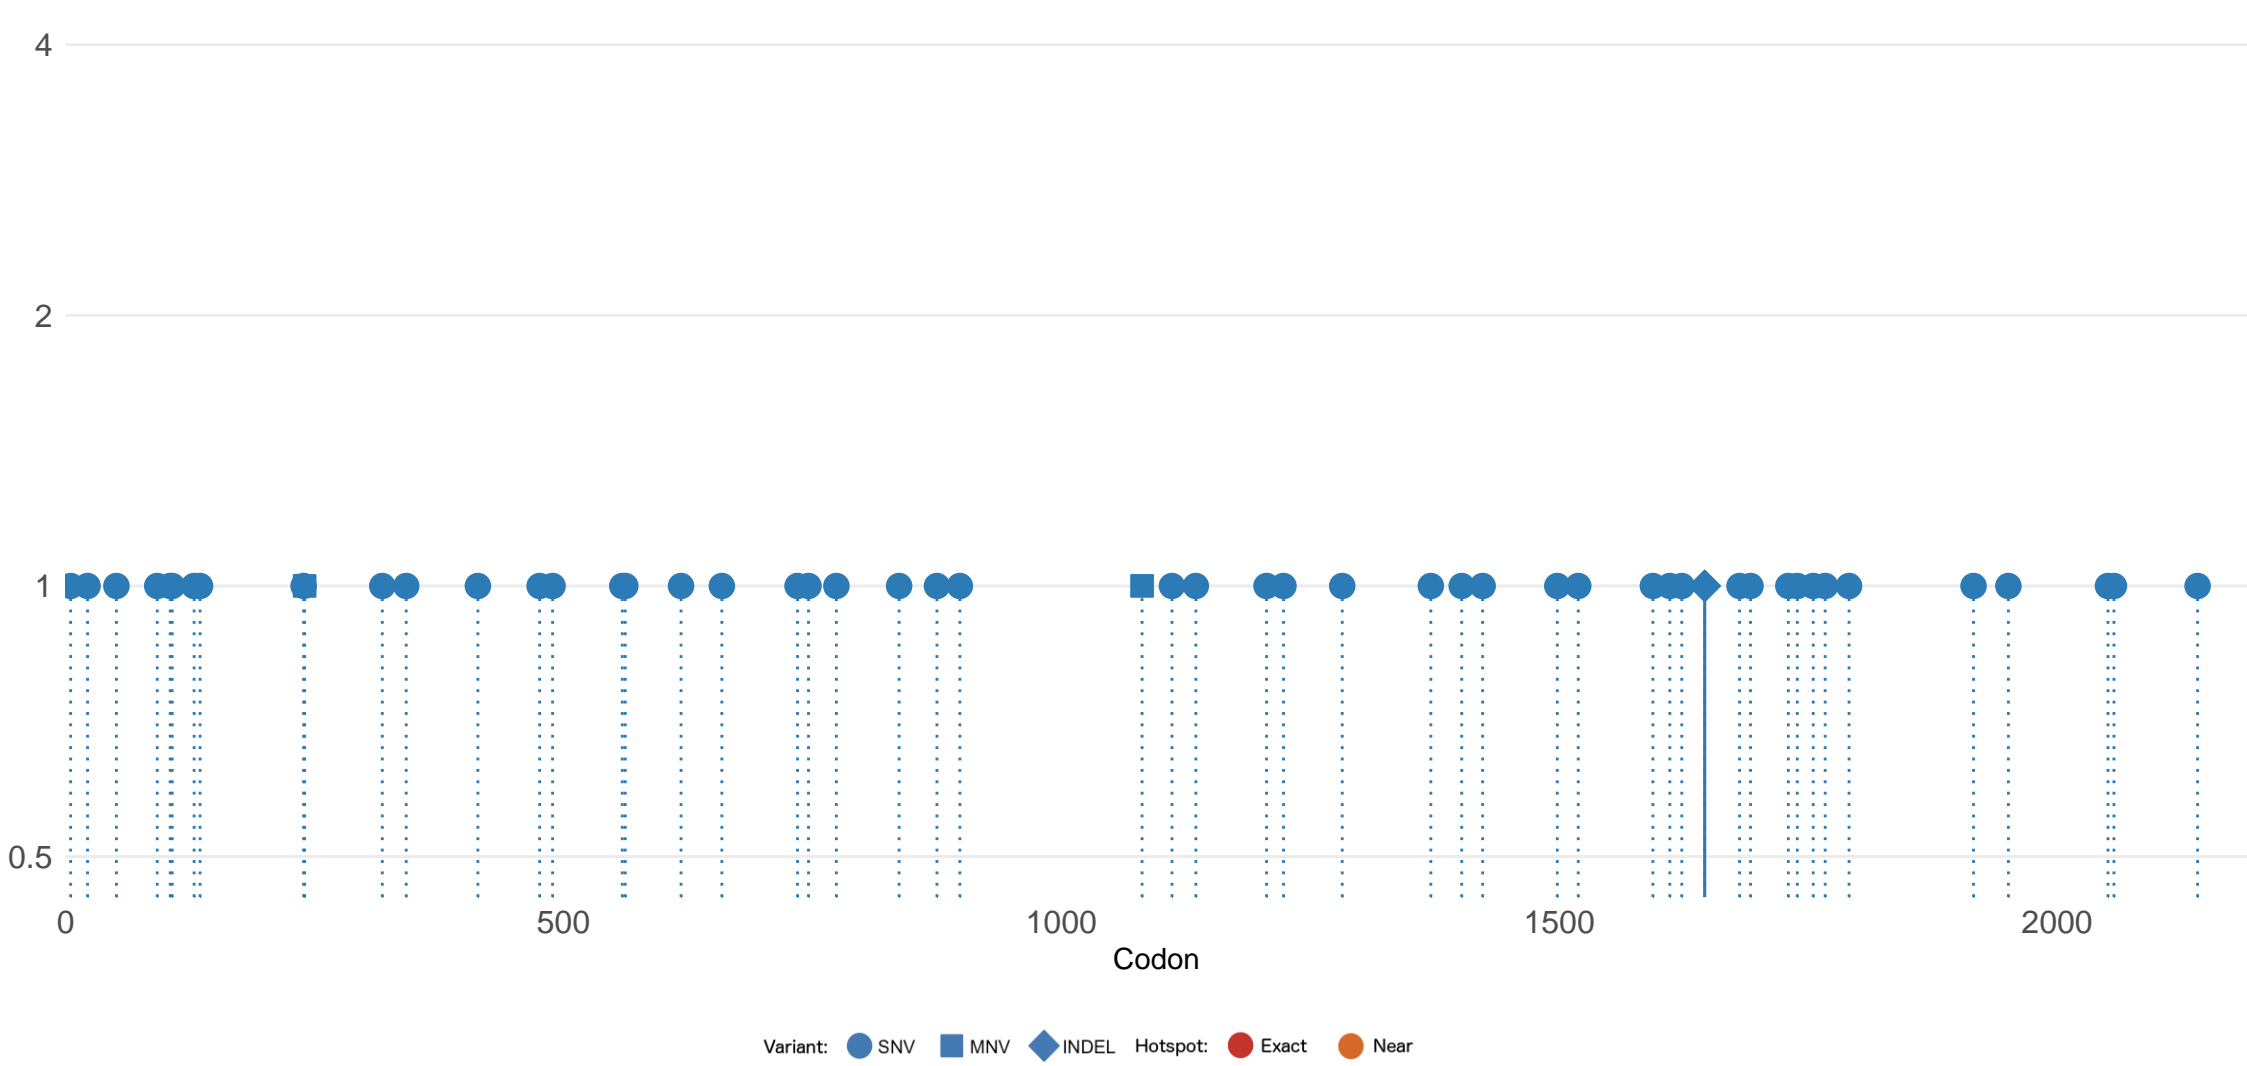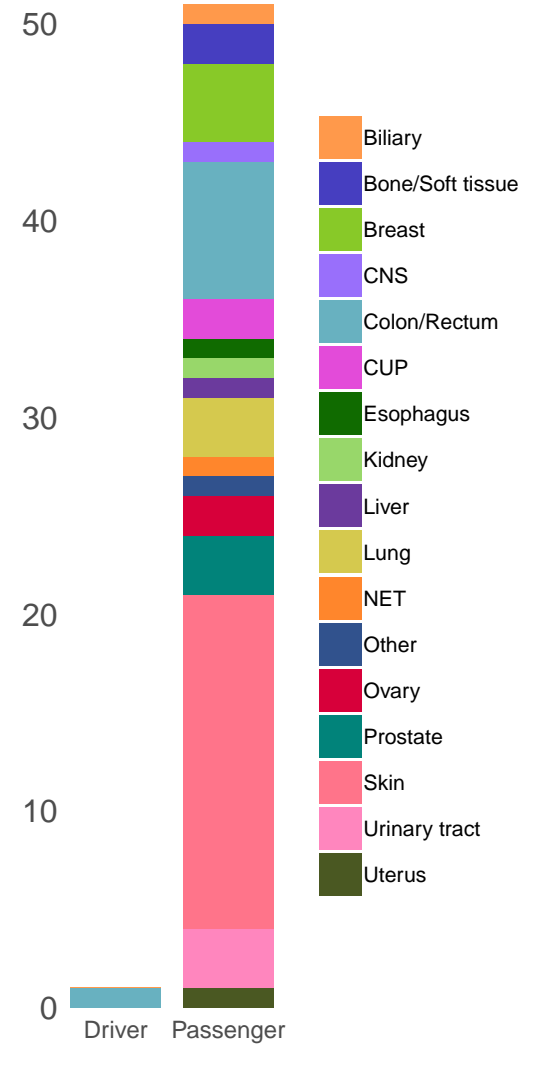

# CALR Variants

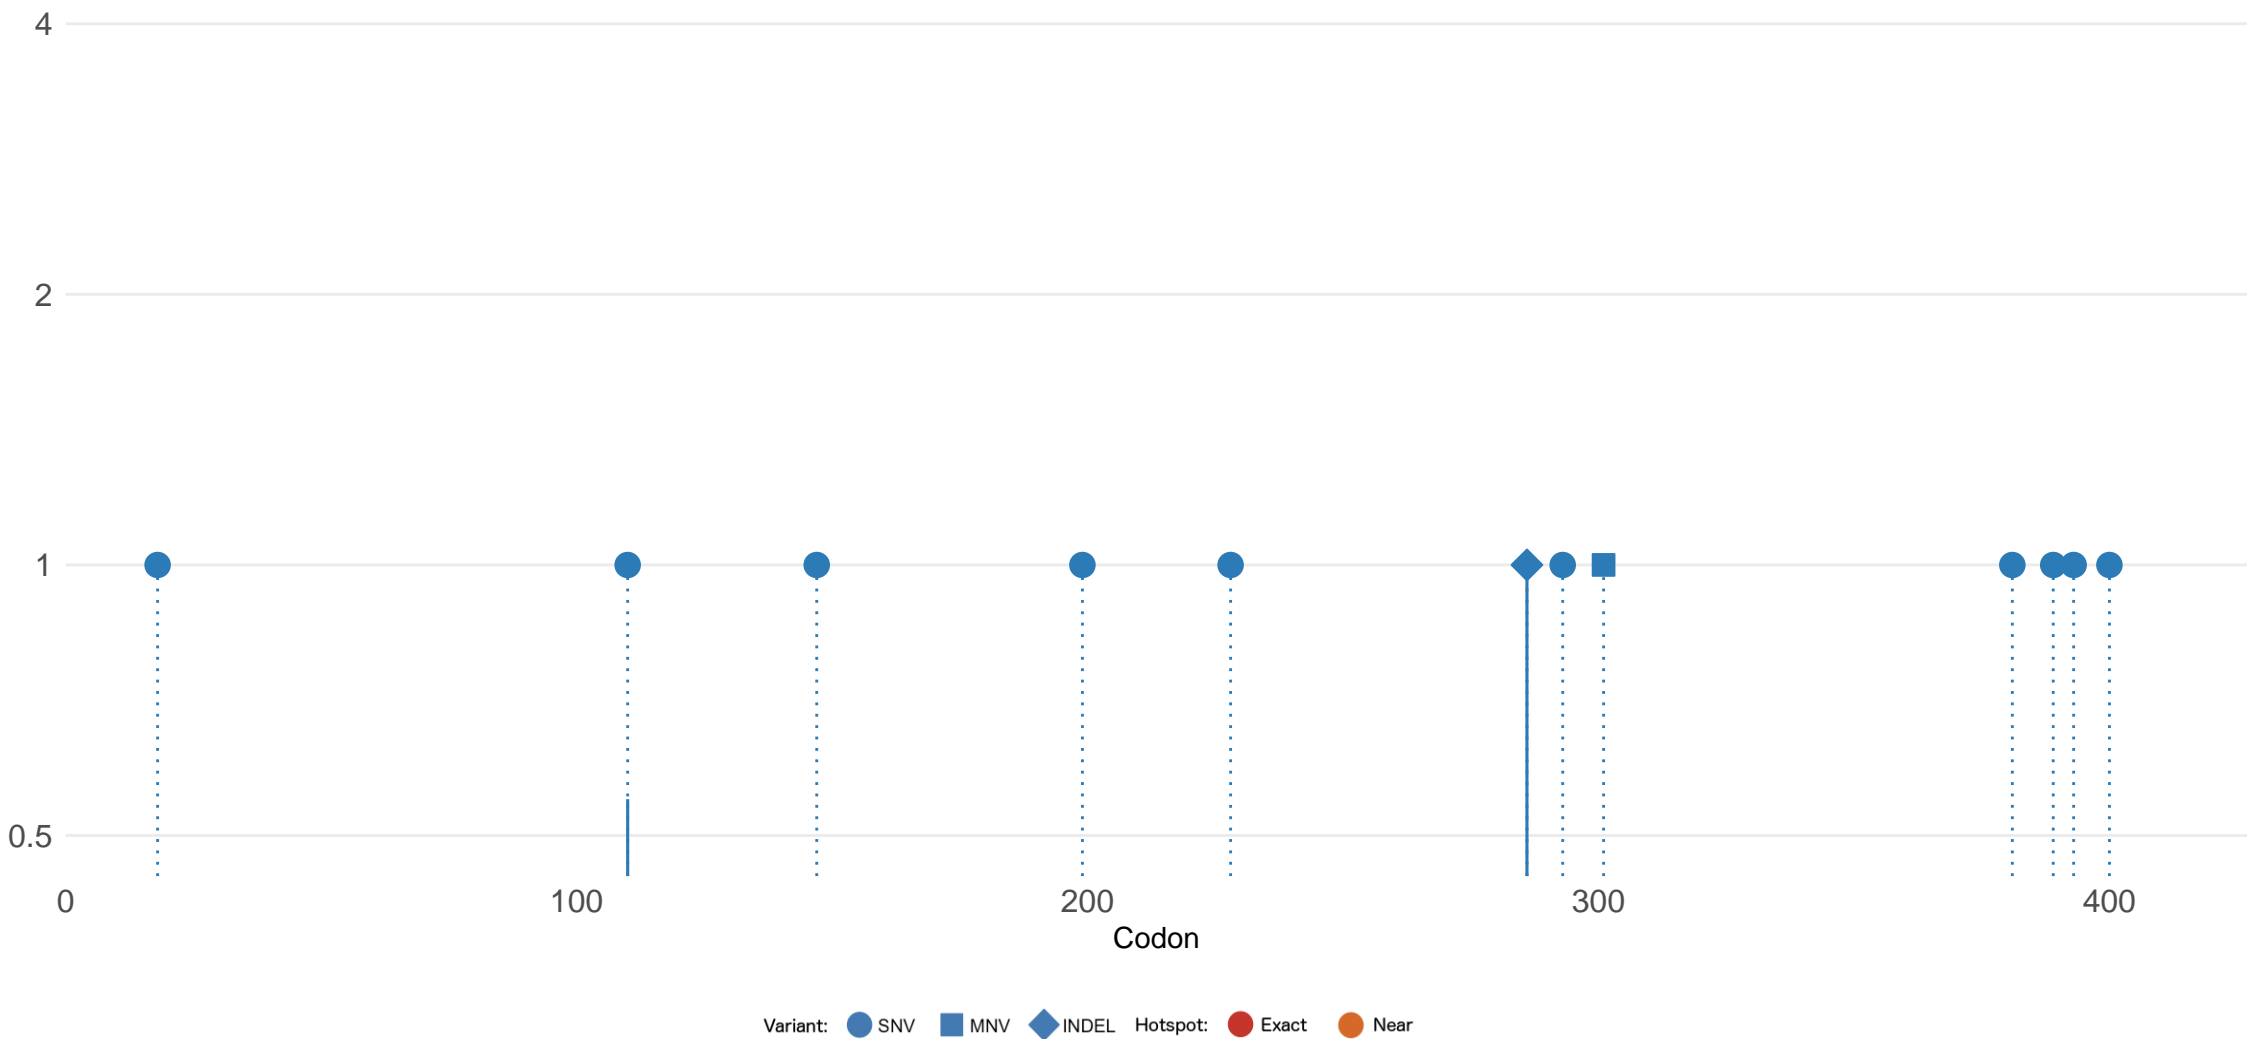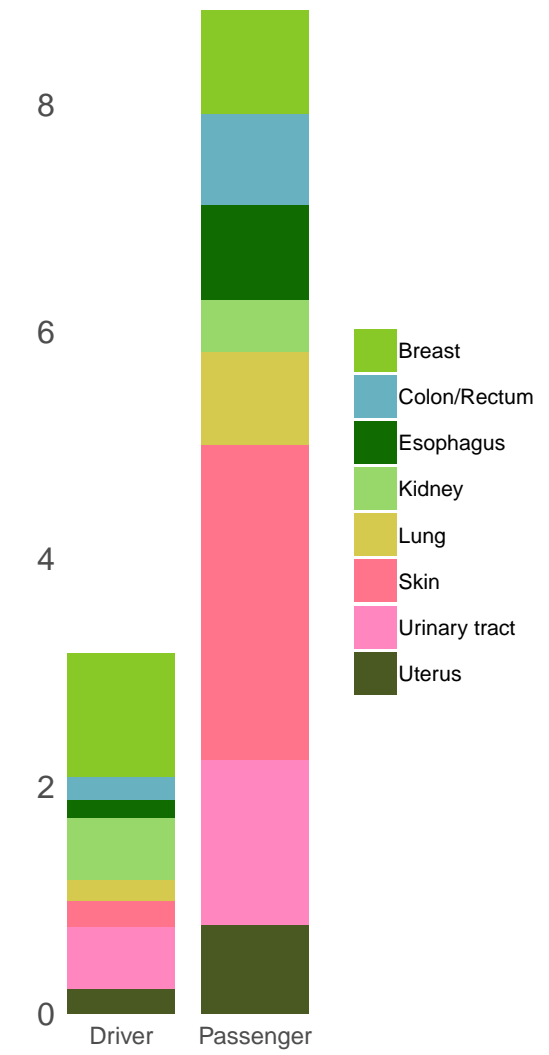

# CARD11 Variants

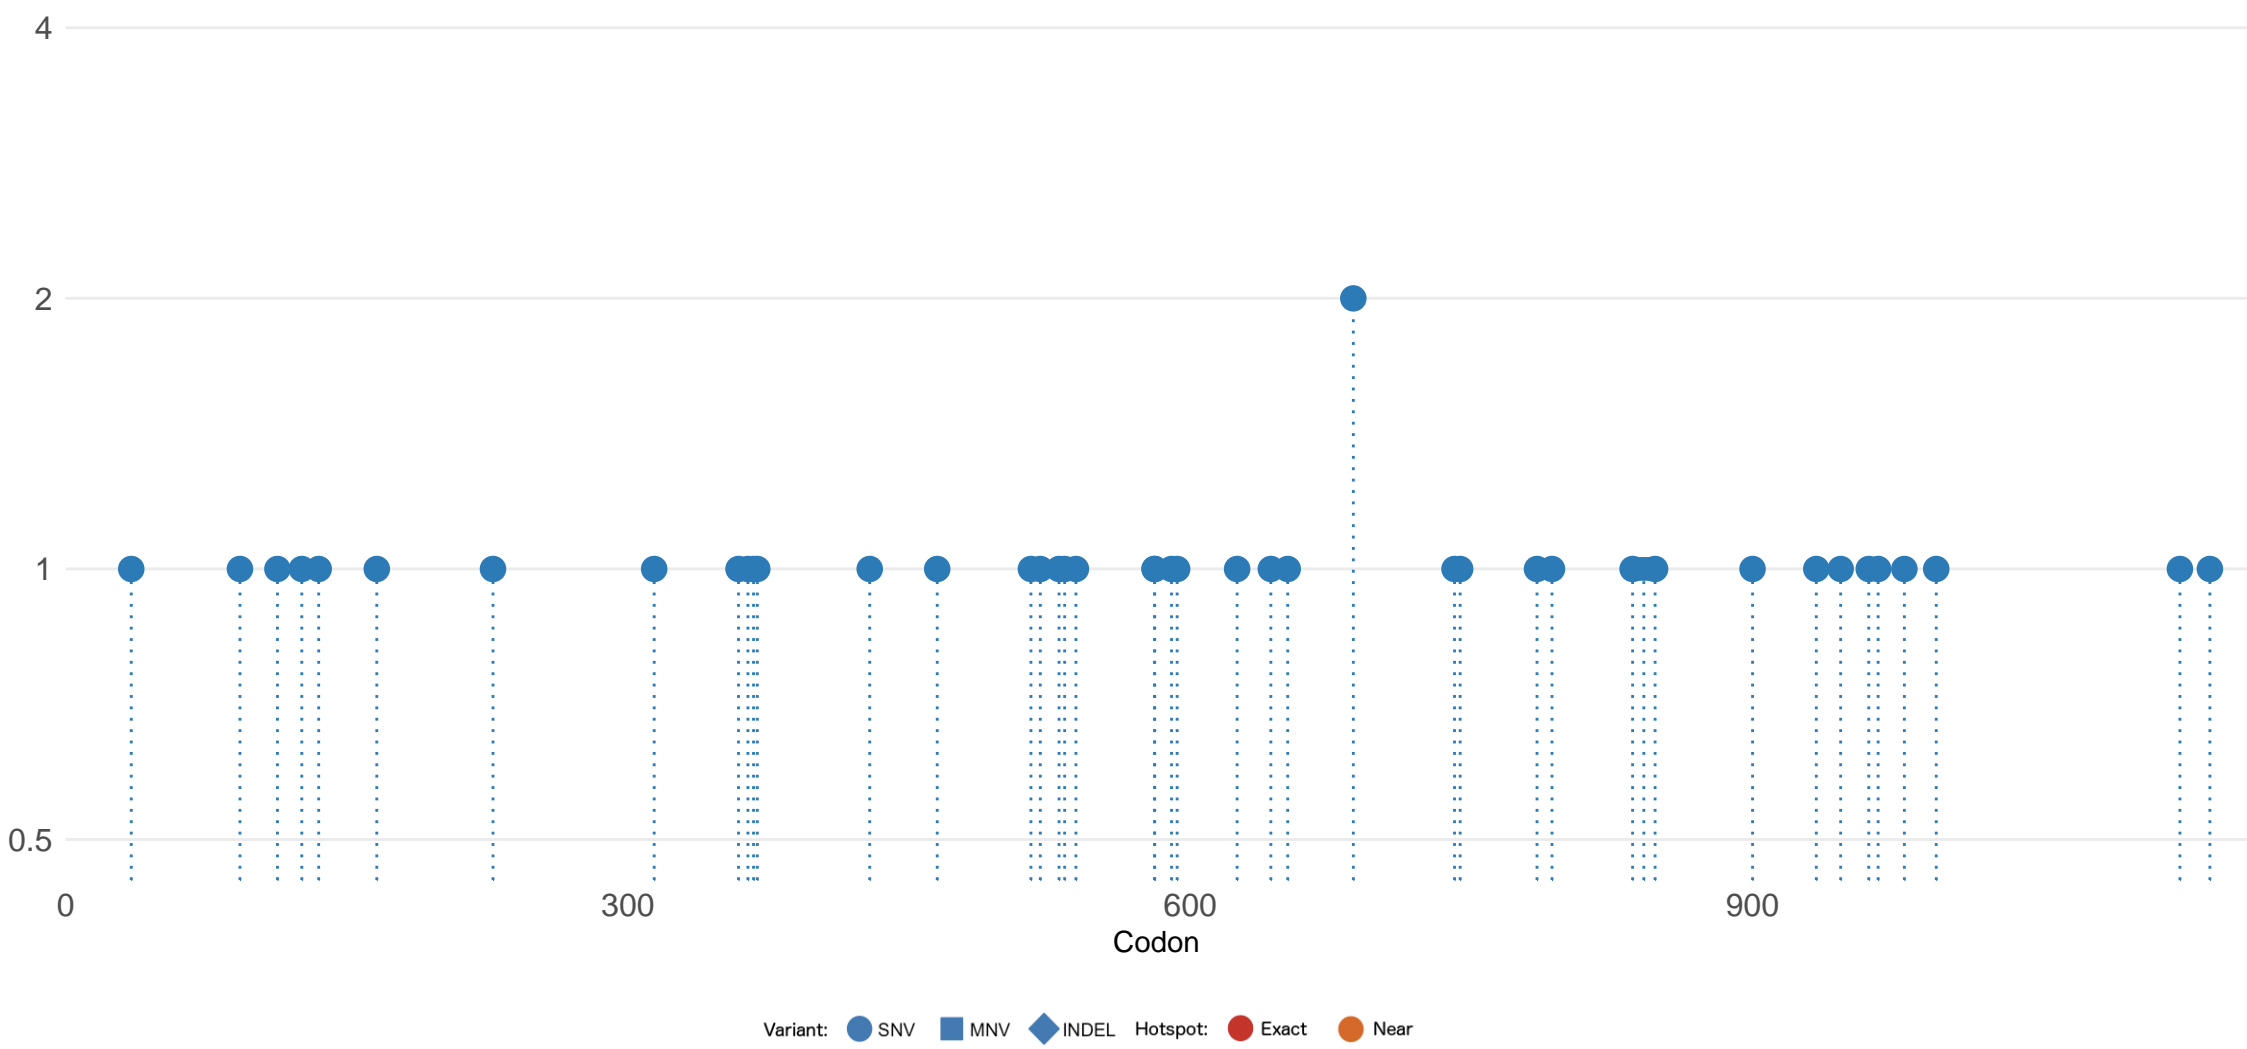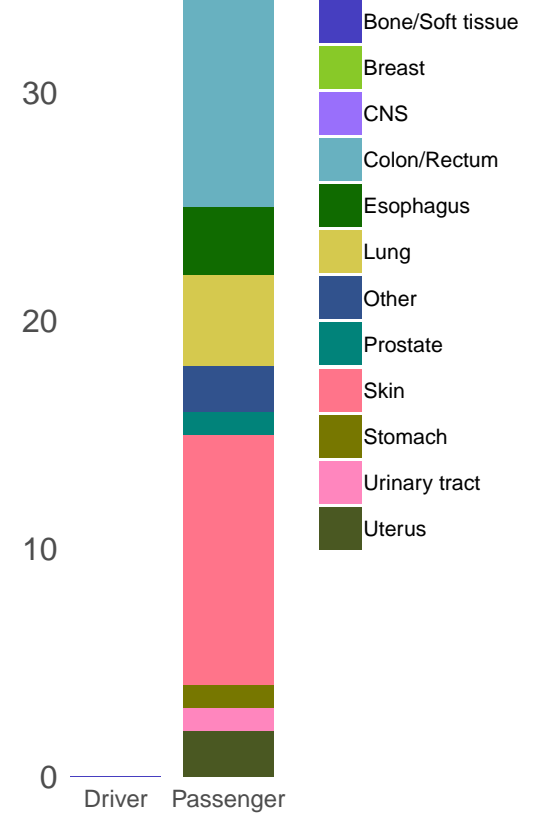

# CD79A Variants

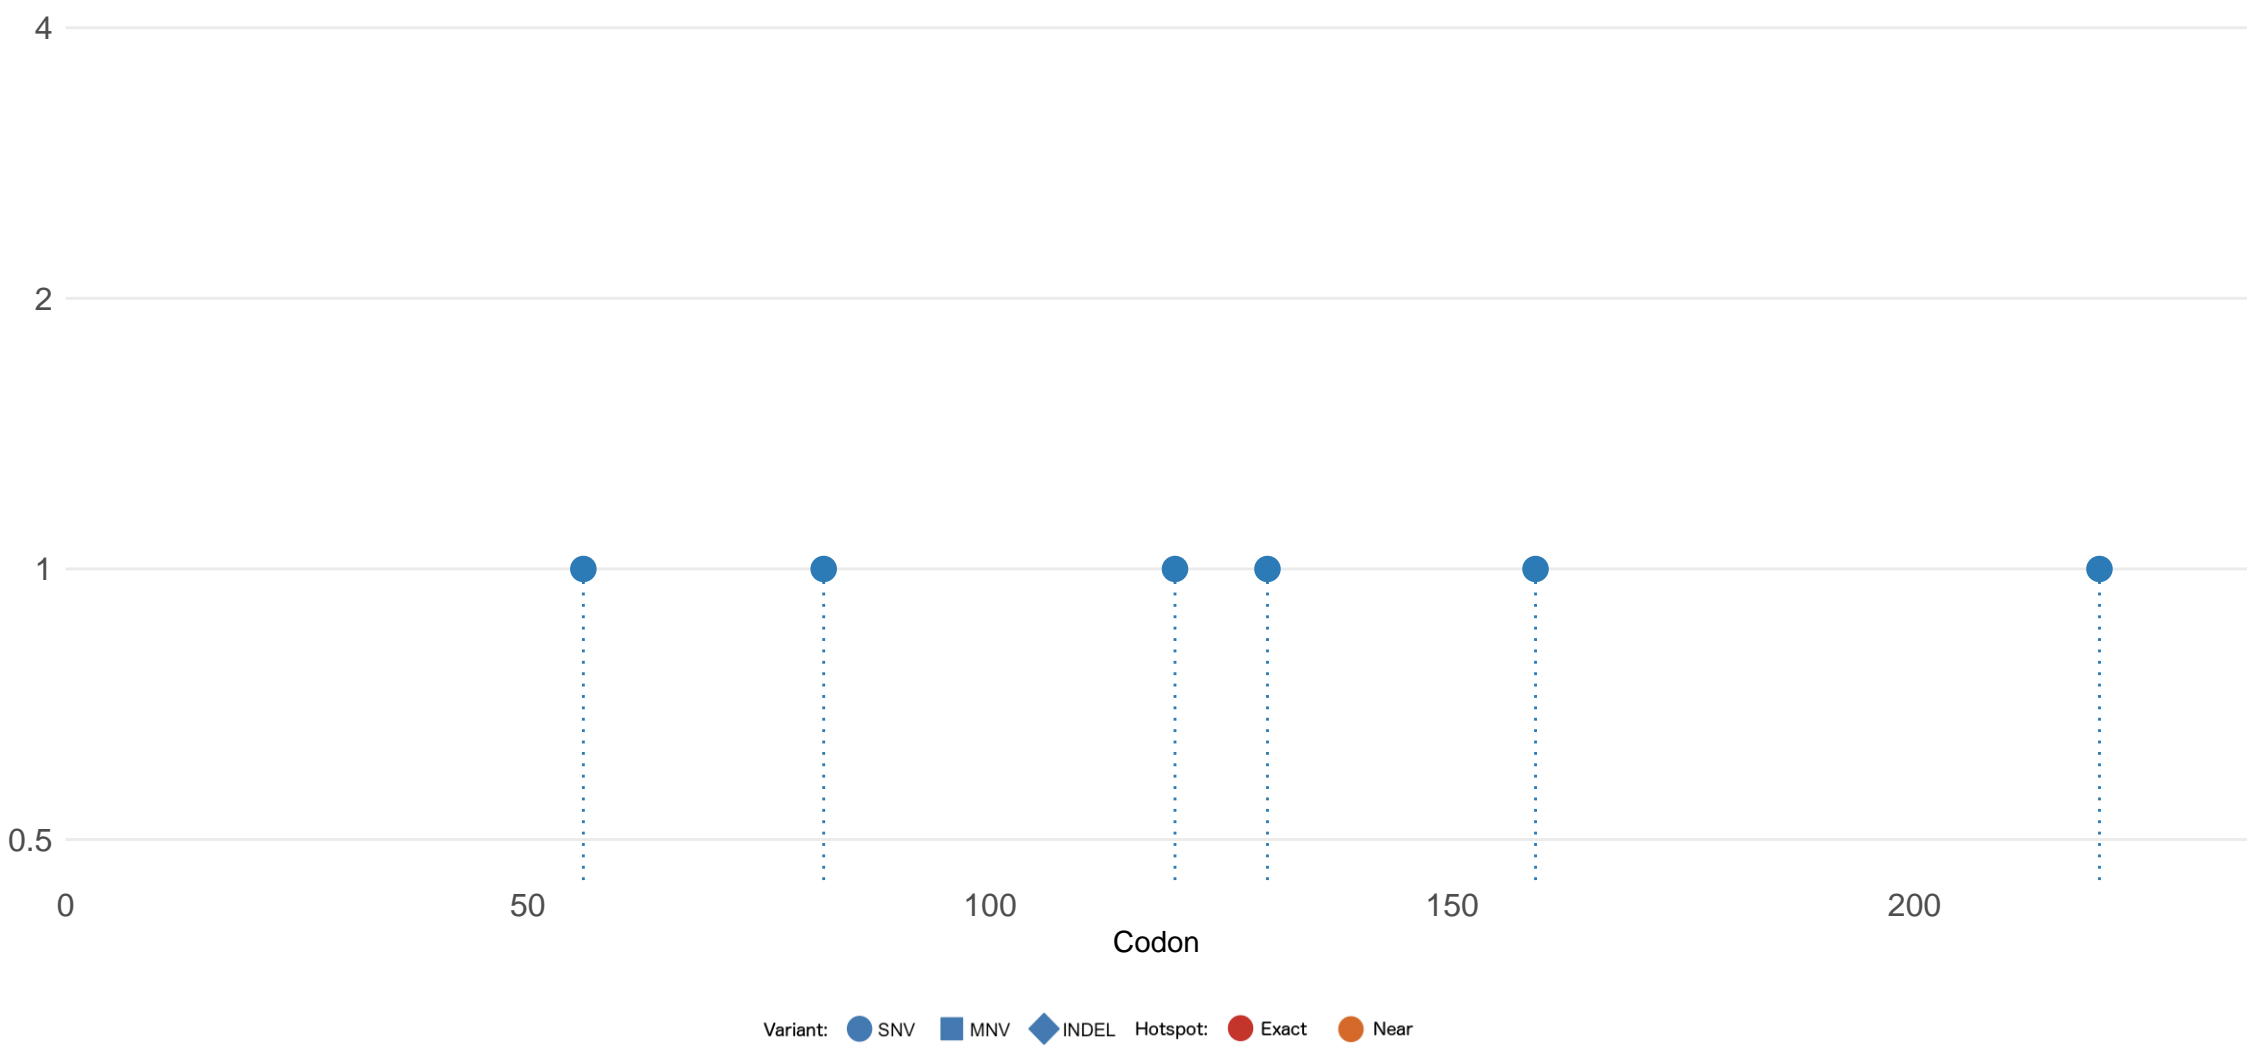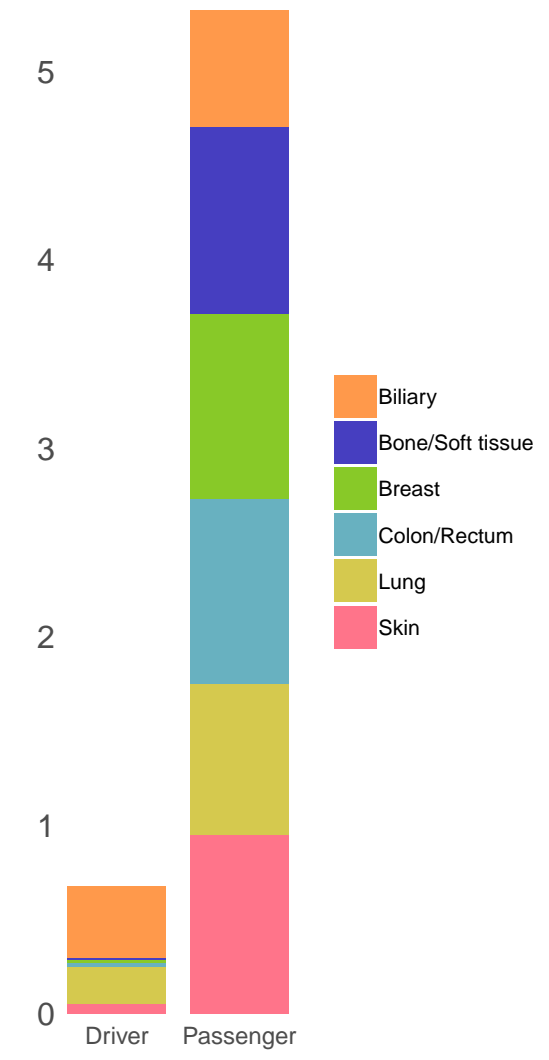

# CD79B Variants

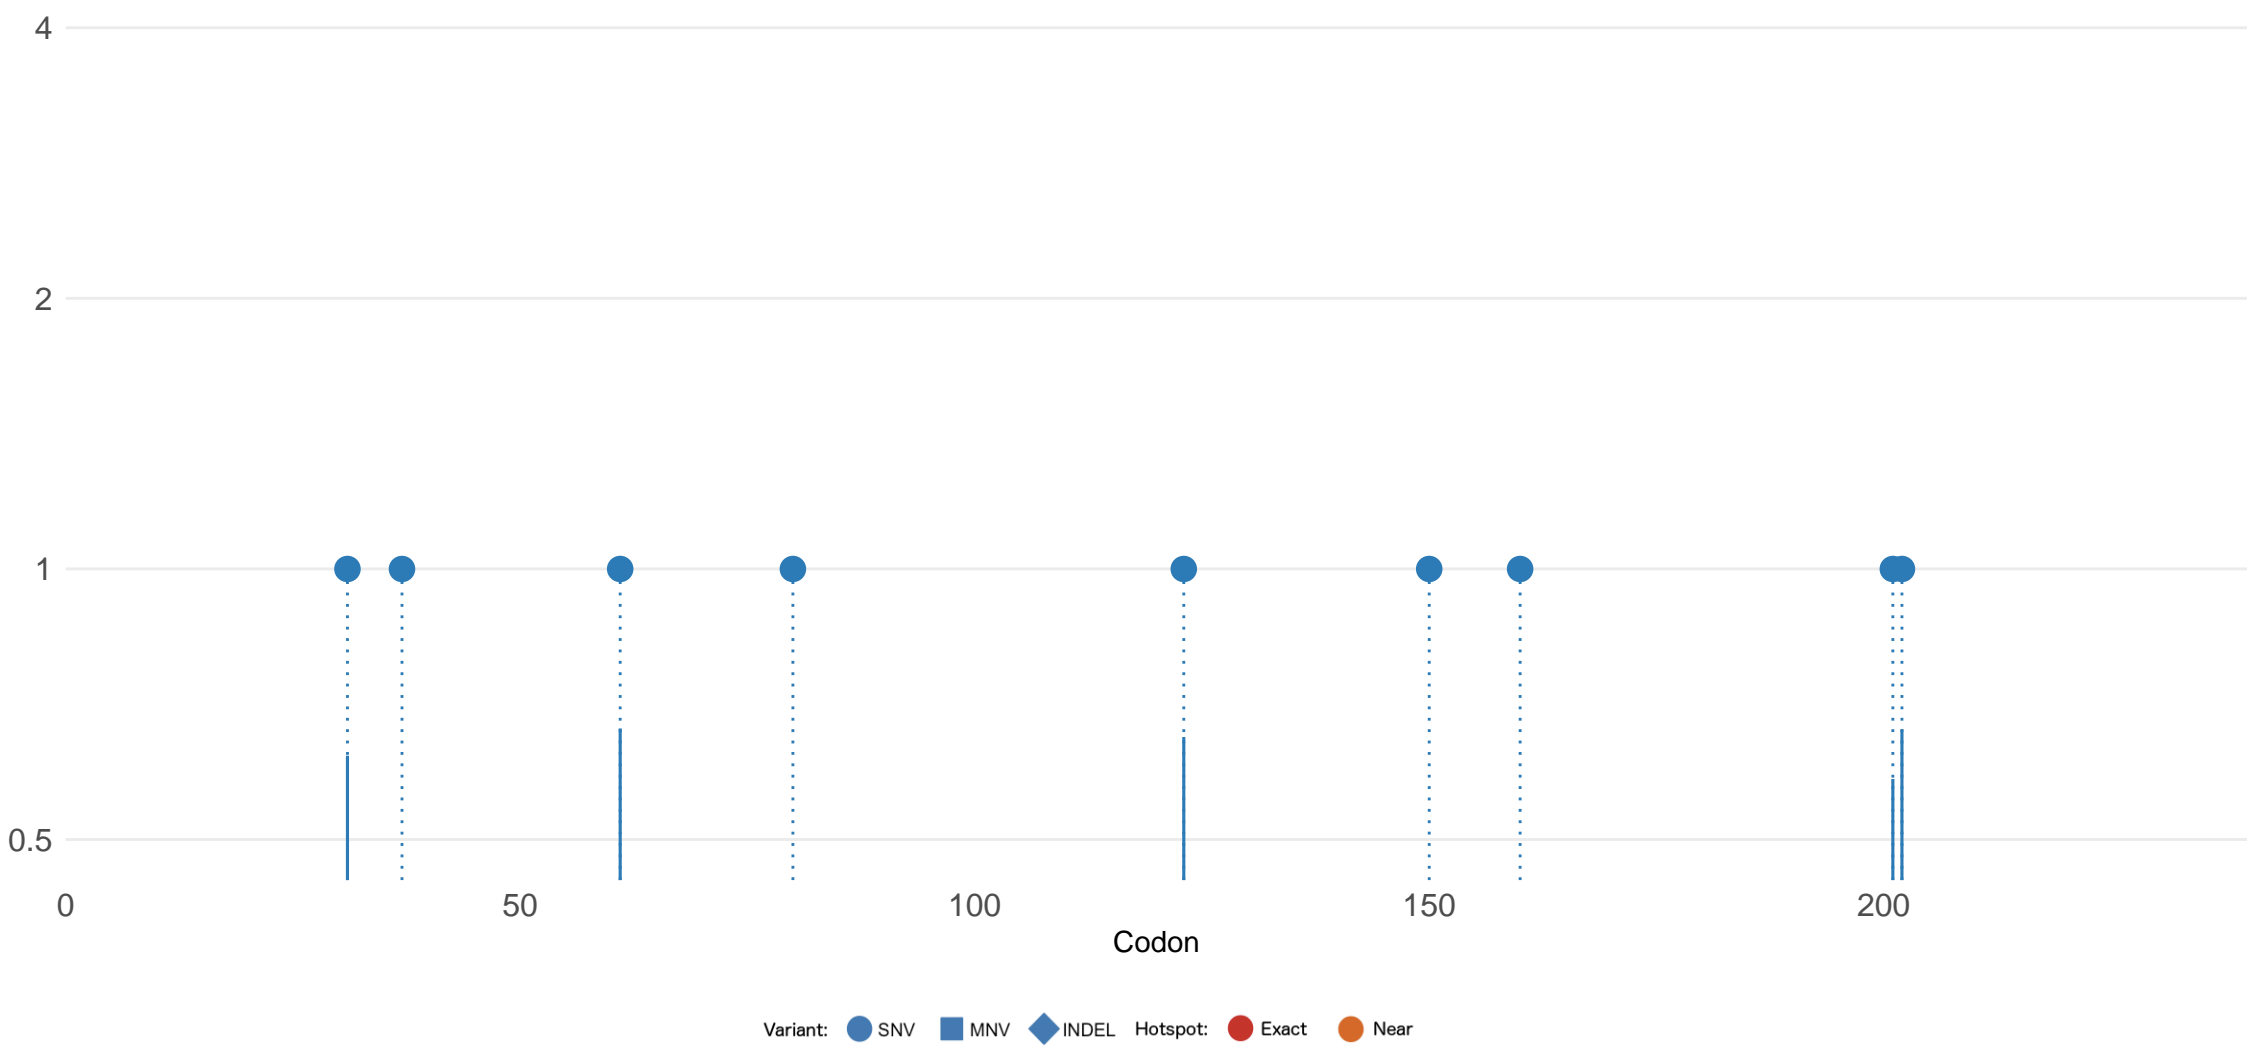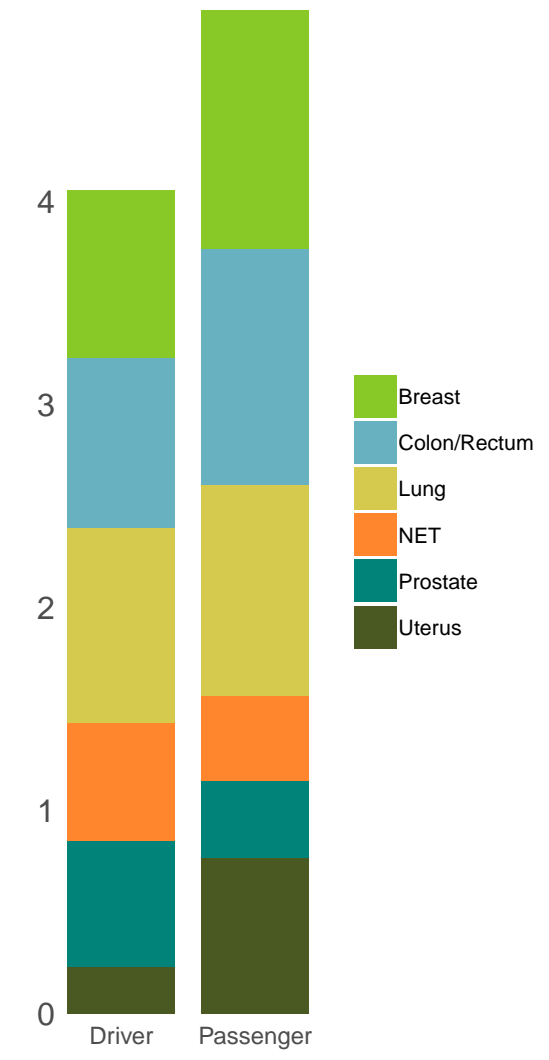

# CDH10 Variants

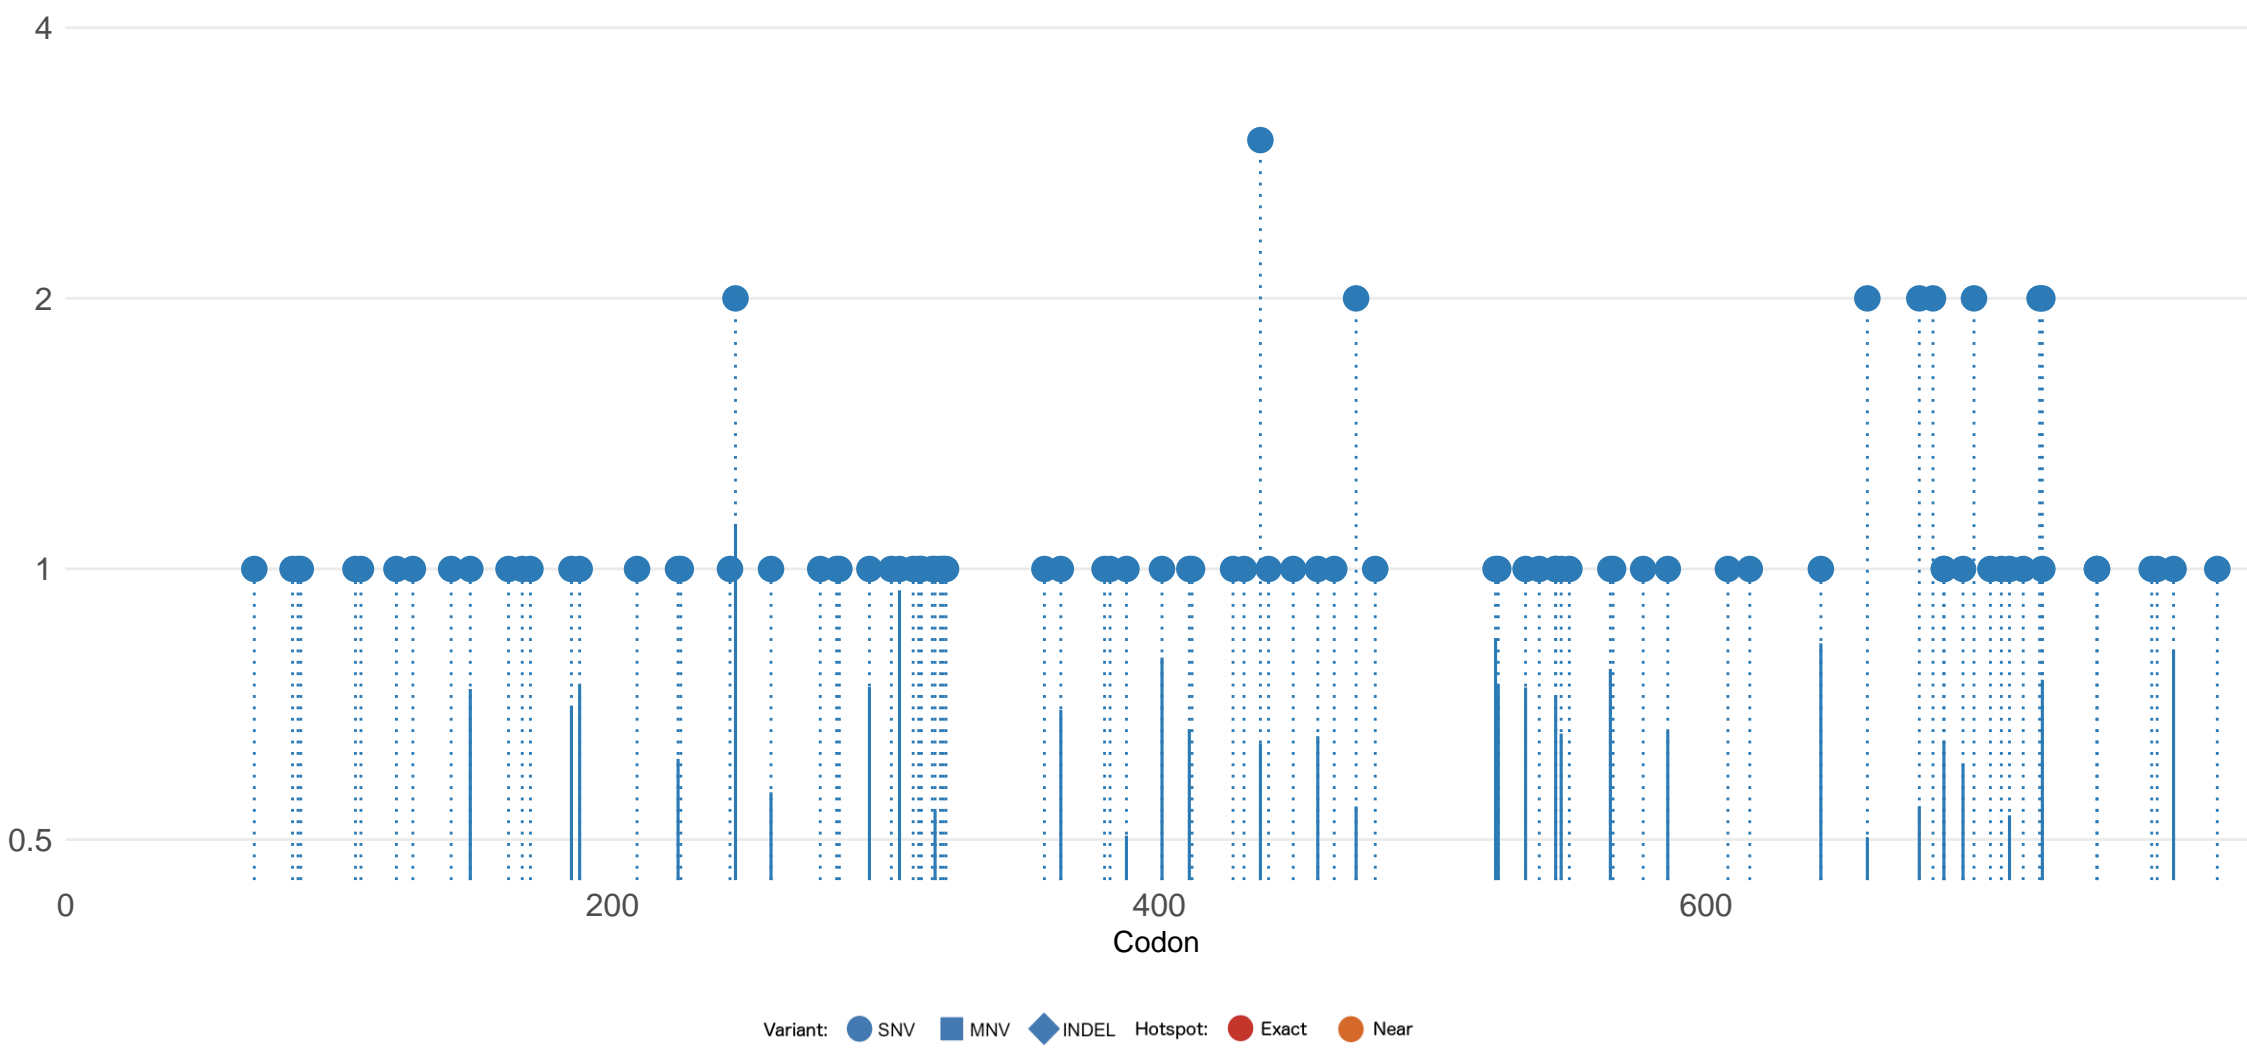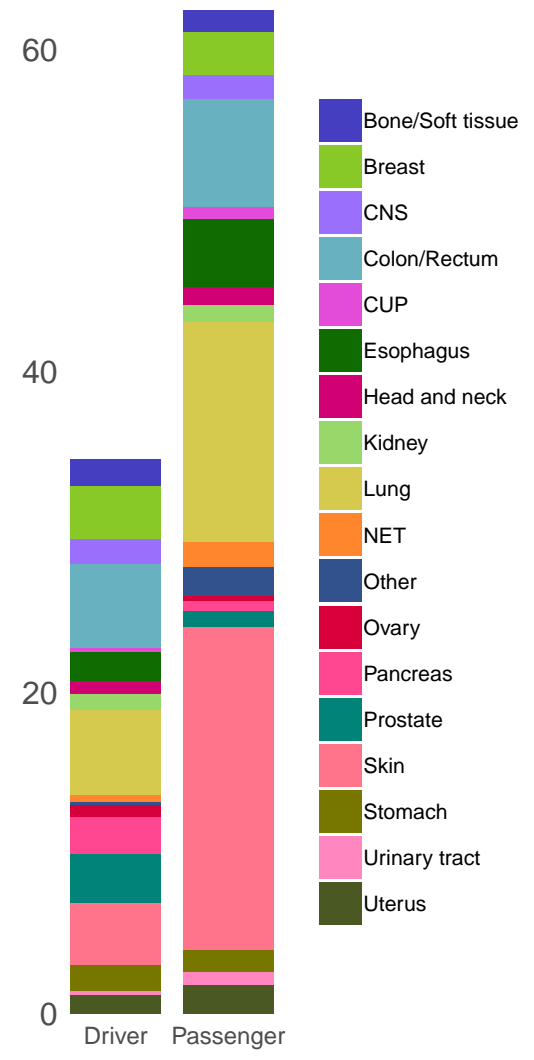



# CIC Variants

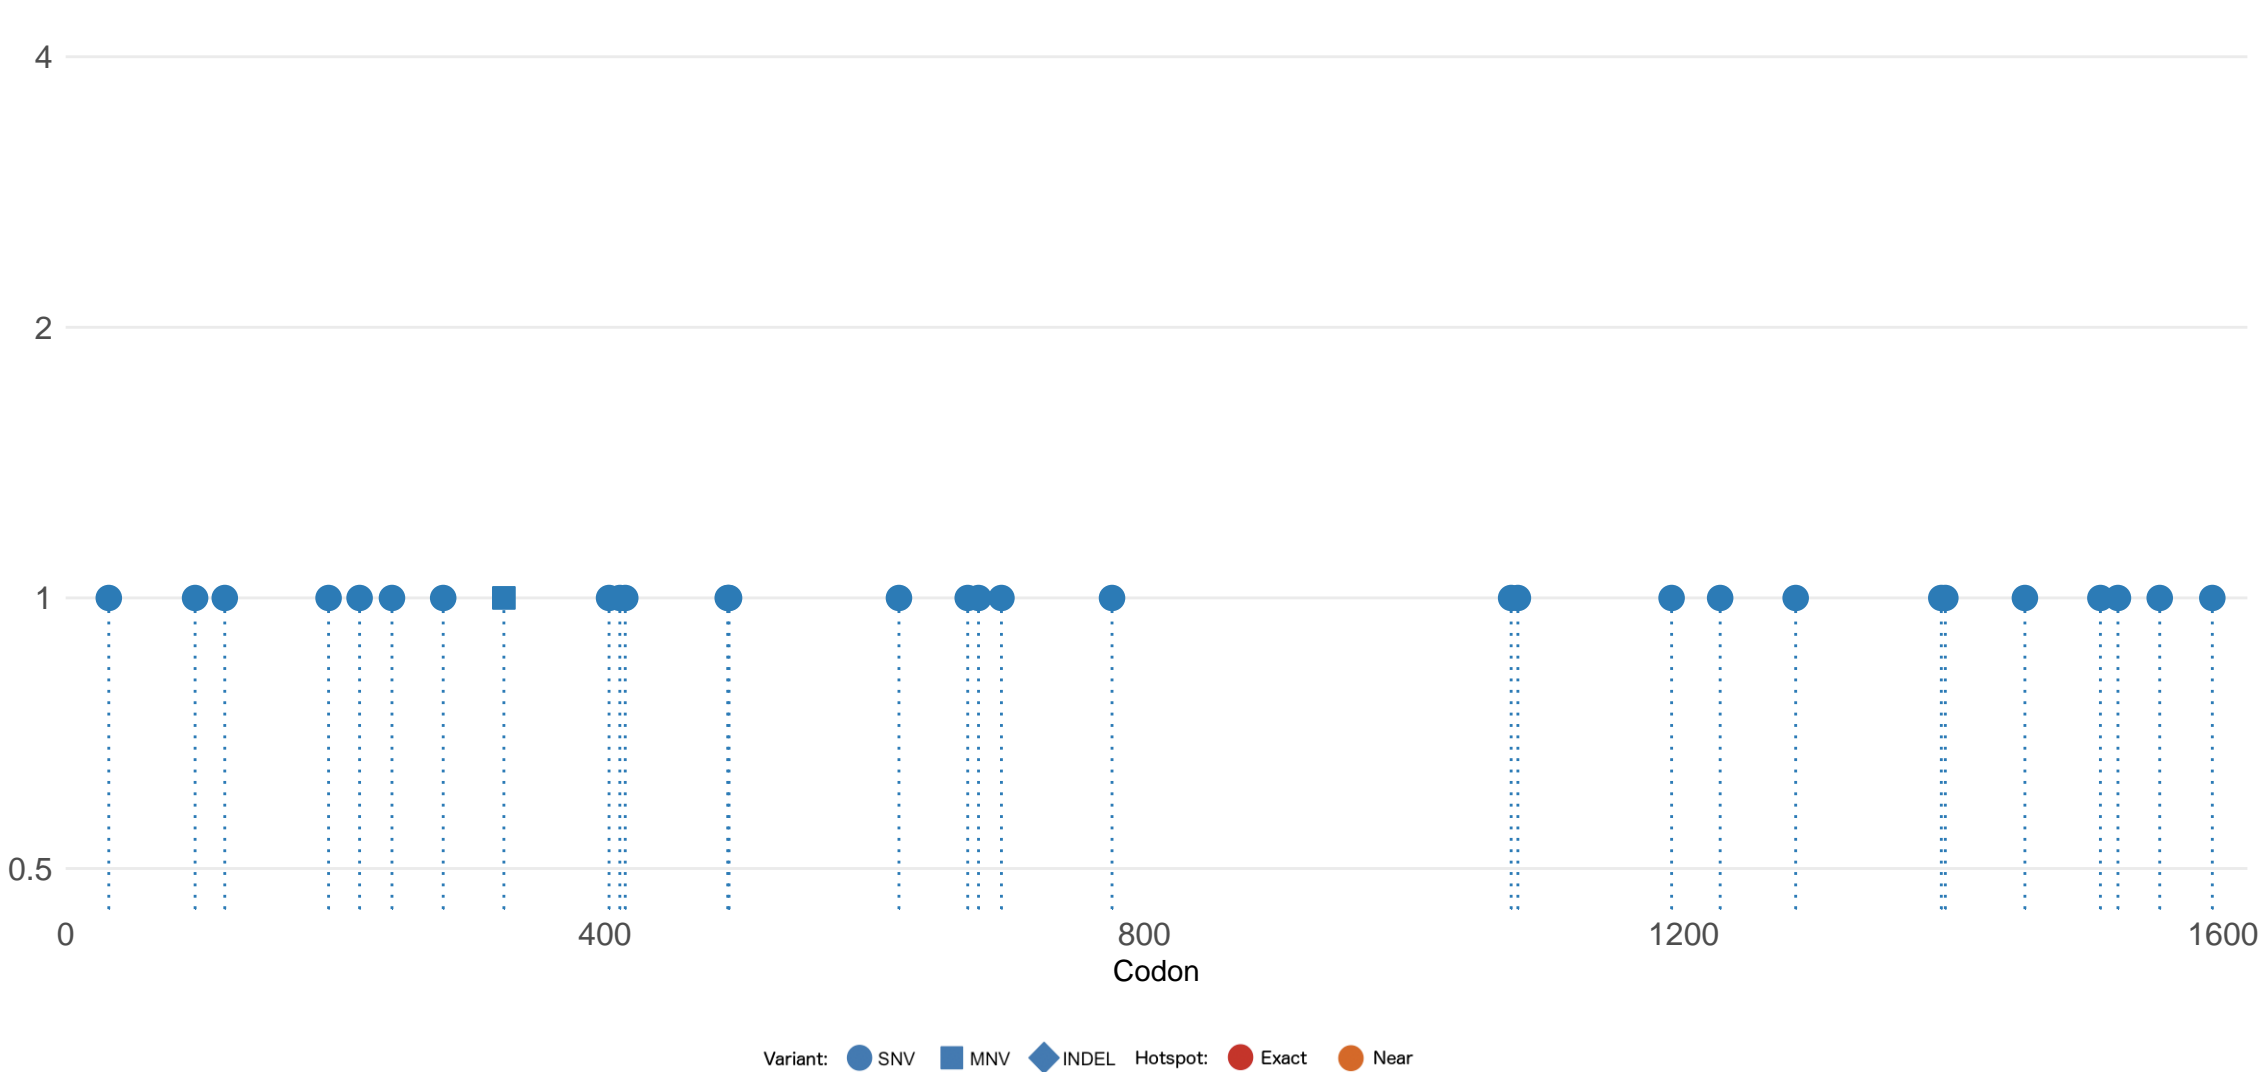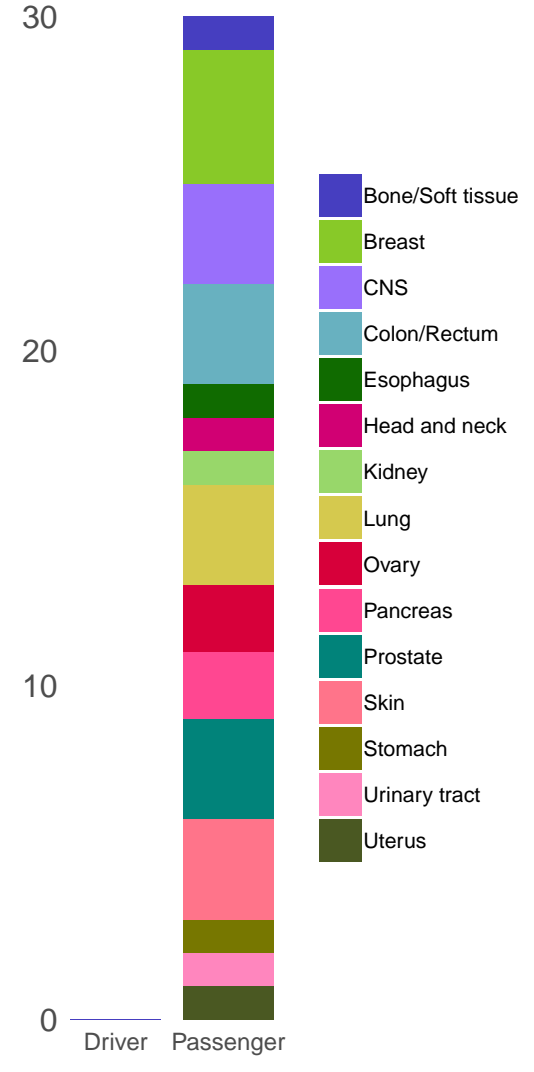

# COL2A1 Variants

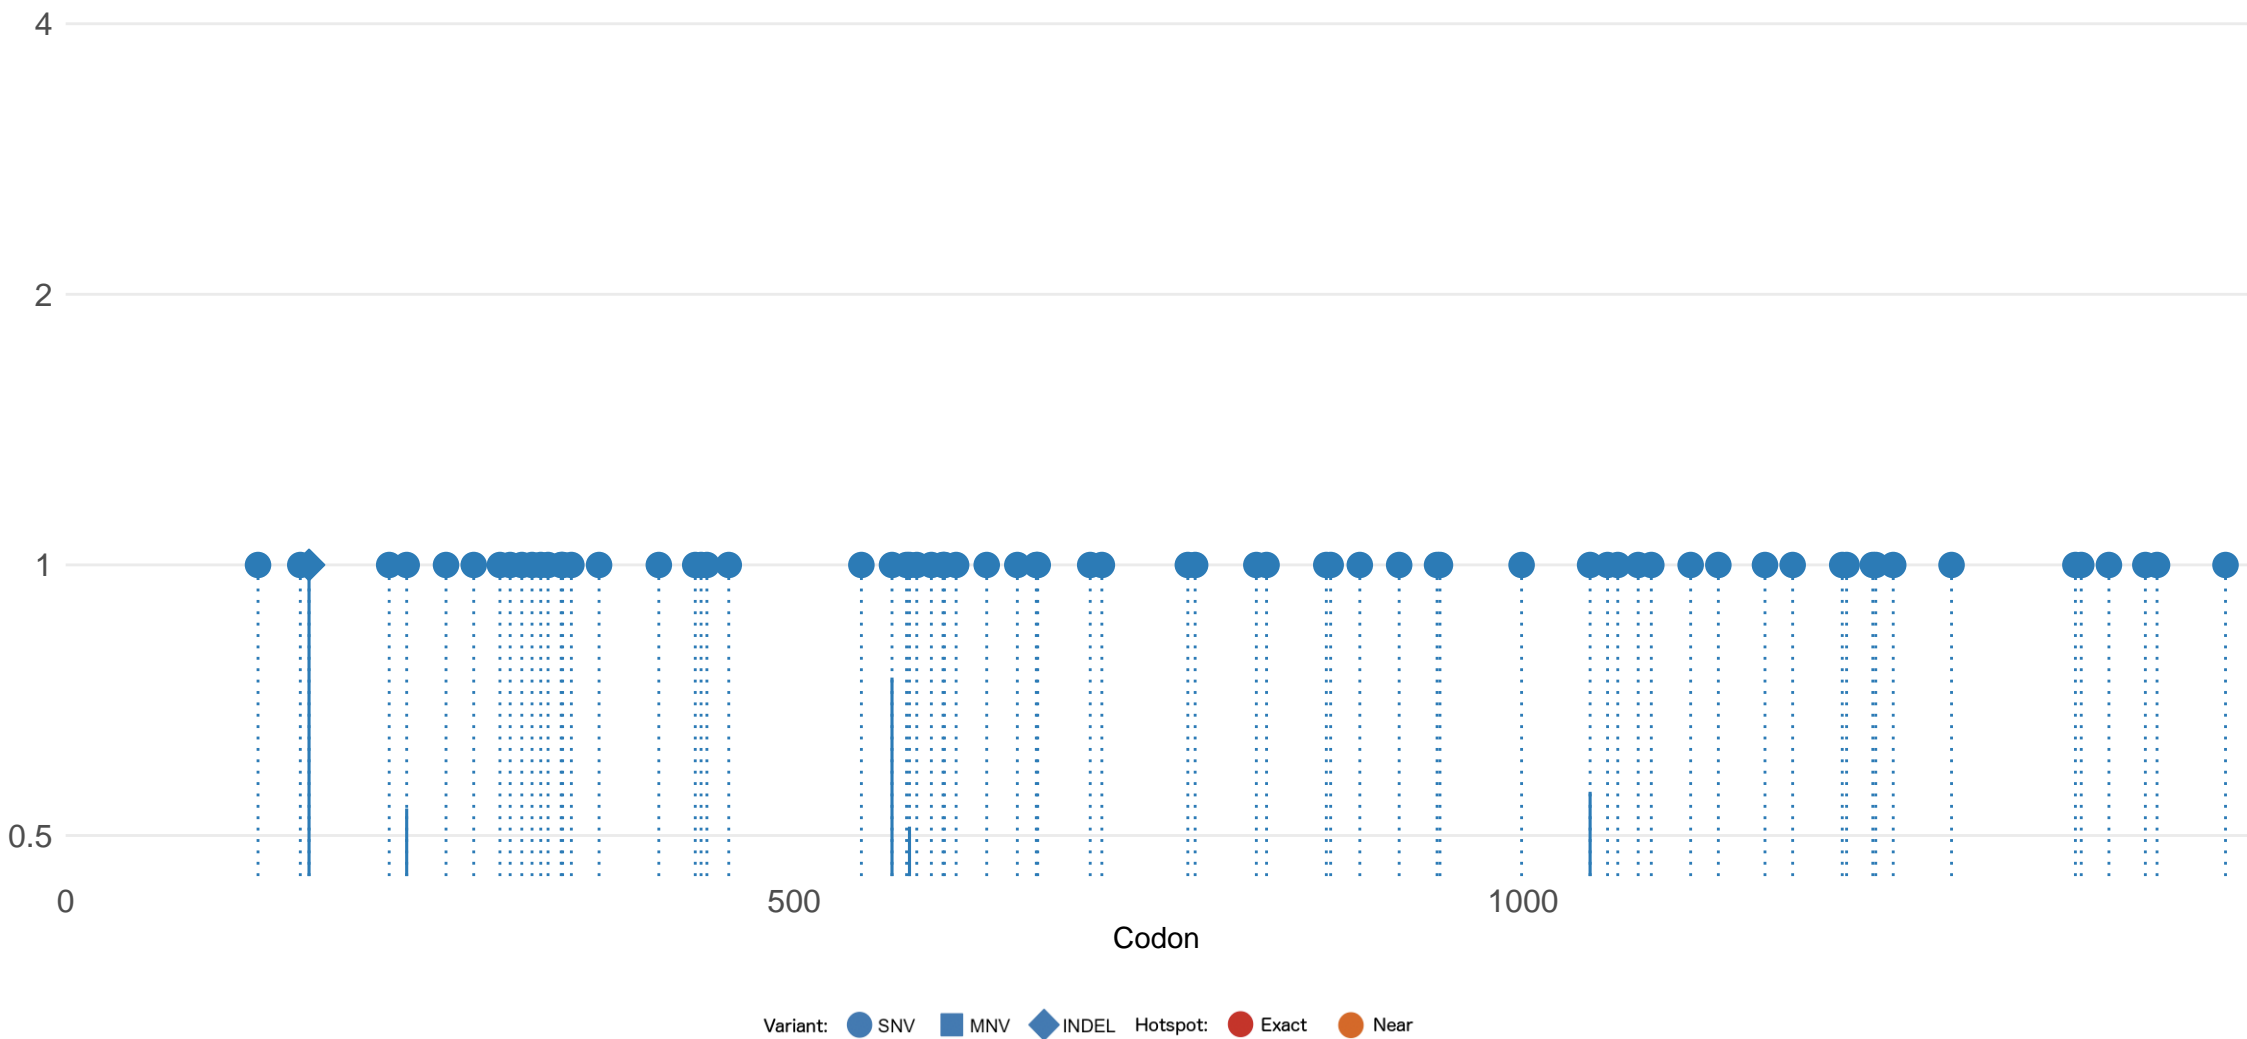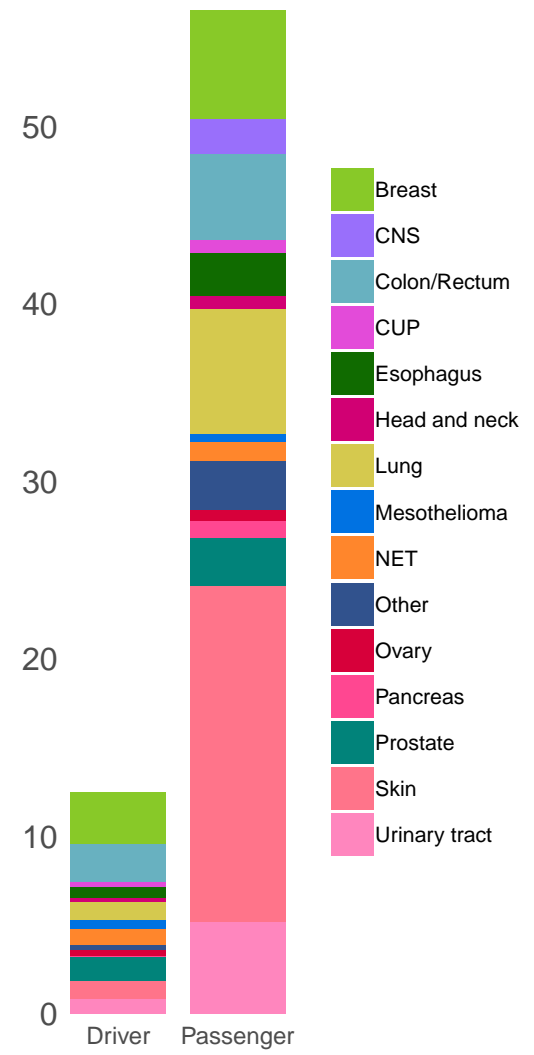

# CRLF2 Variants

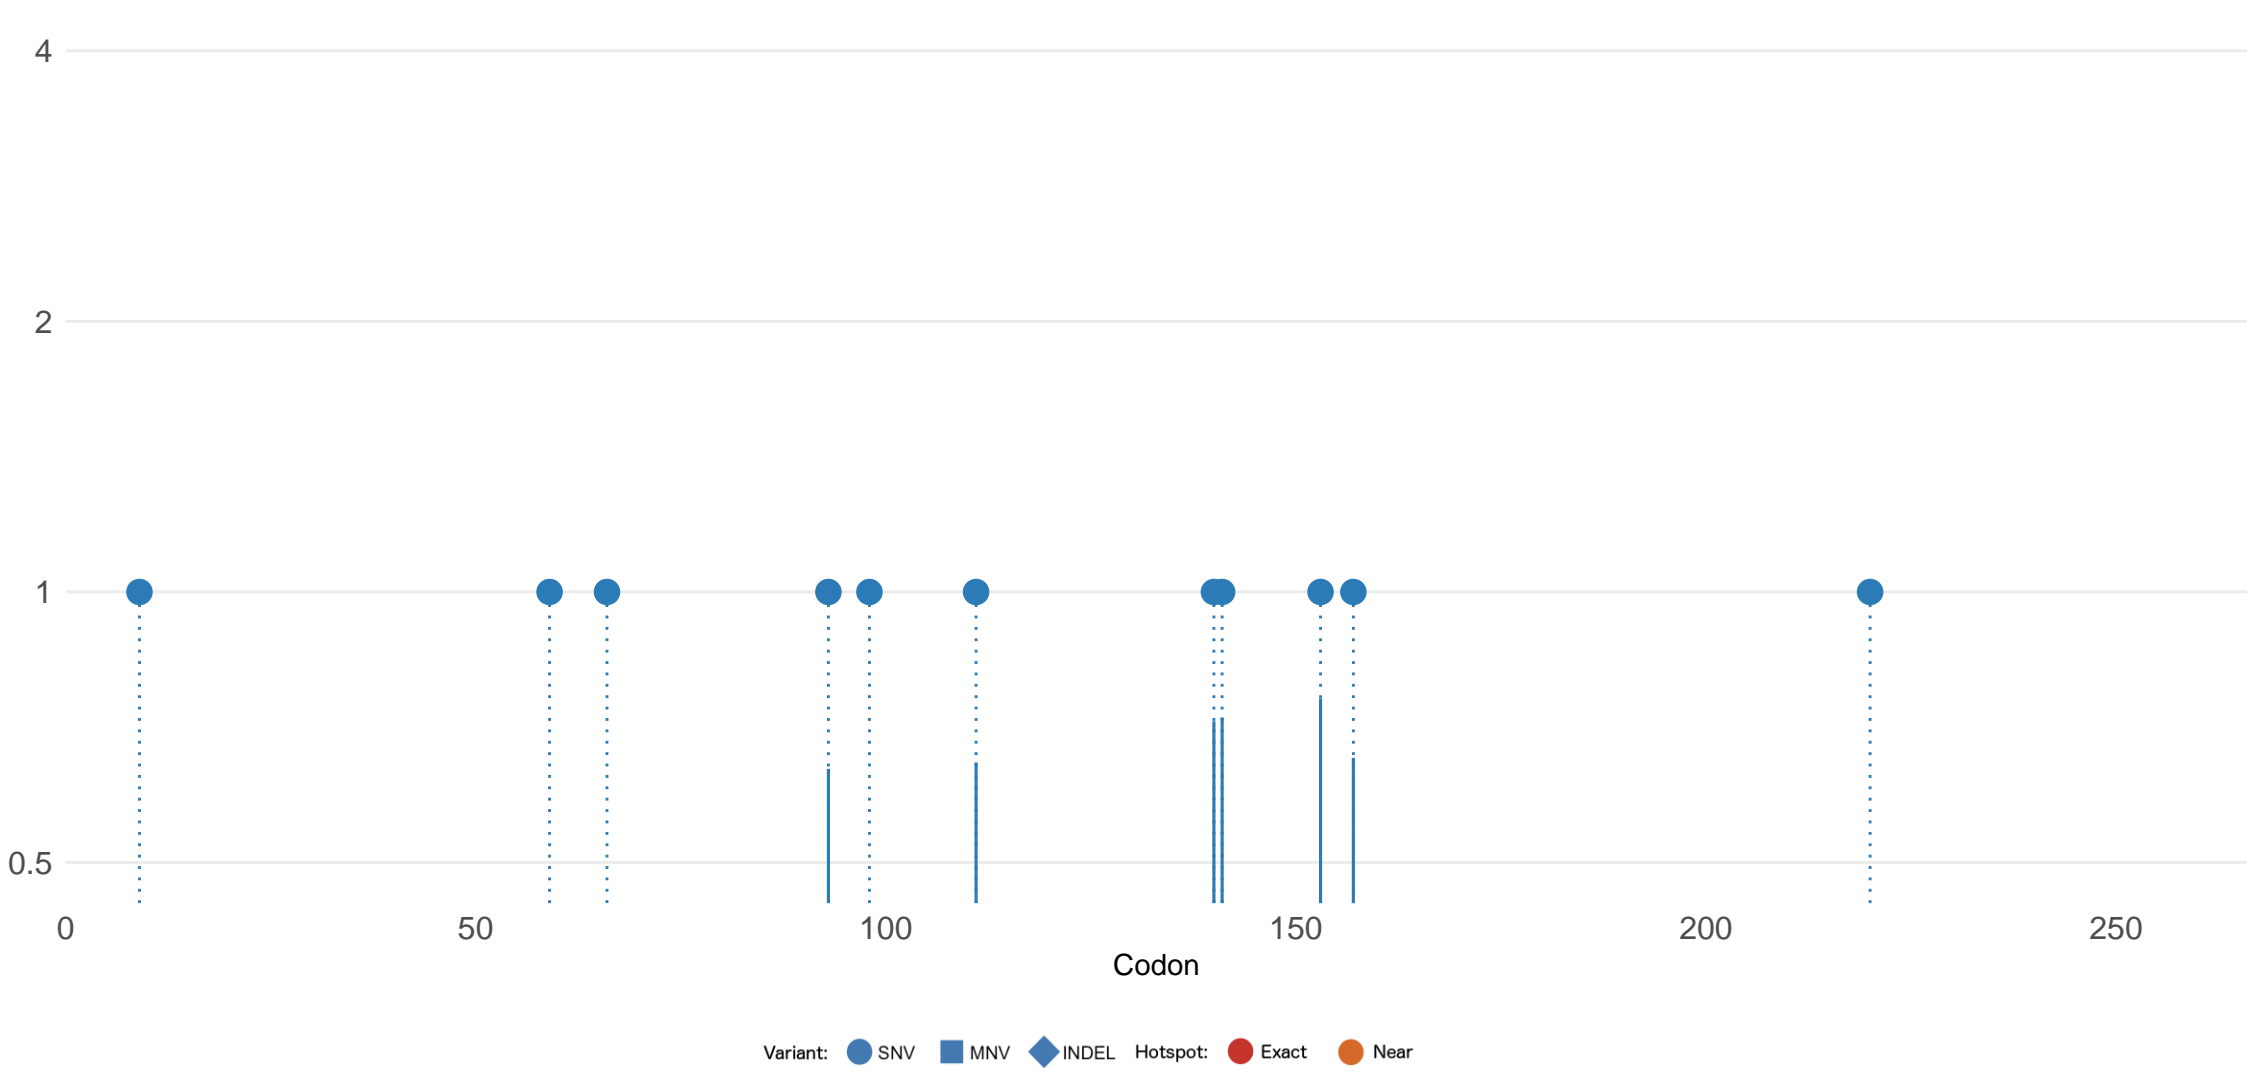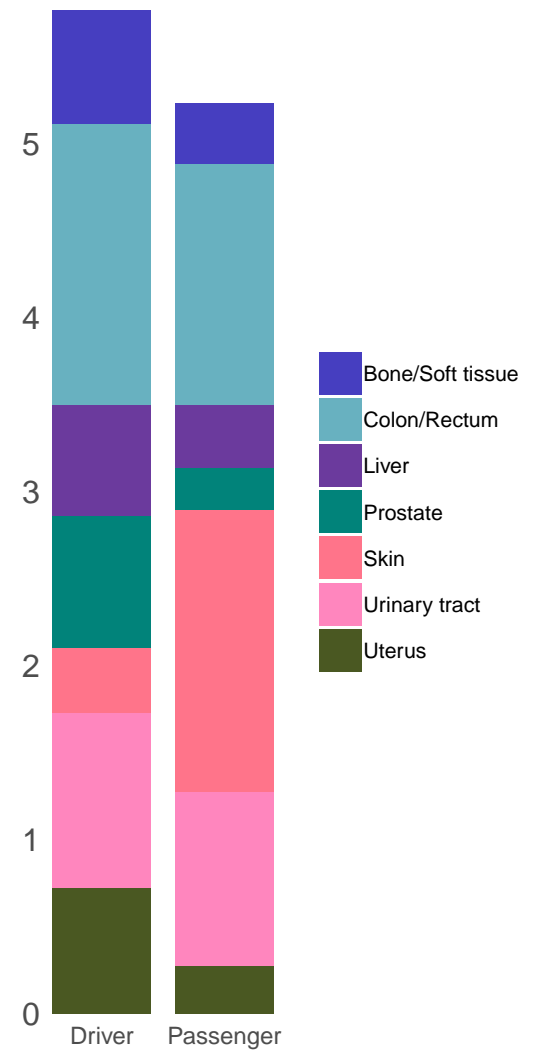

# CSF1R Variants

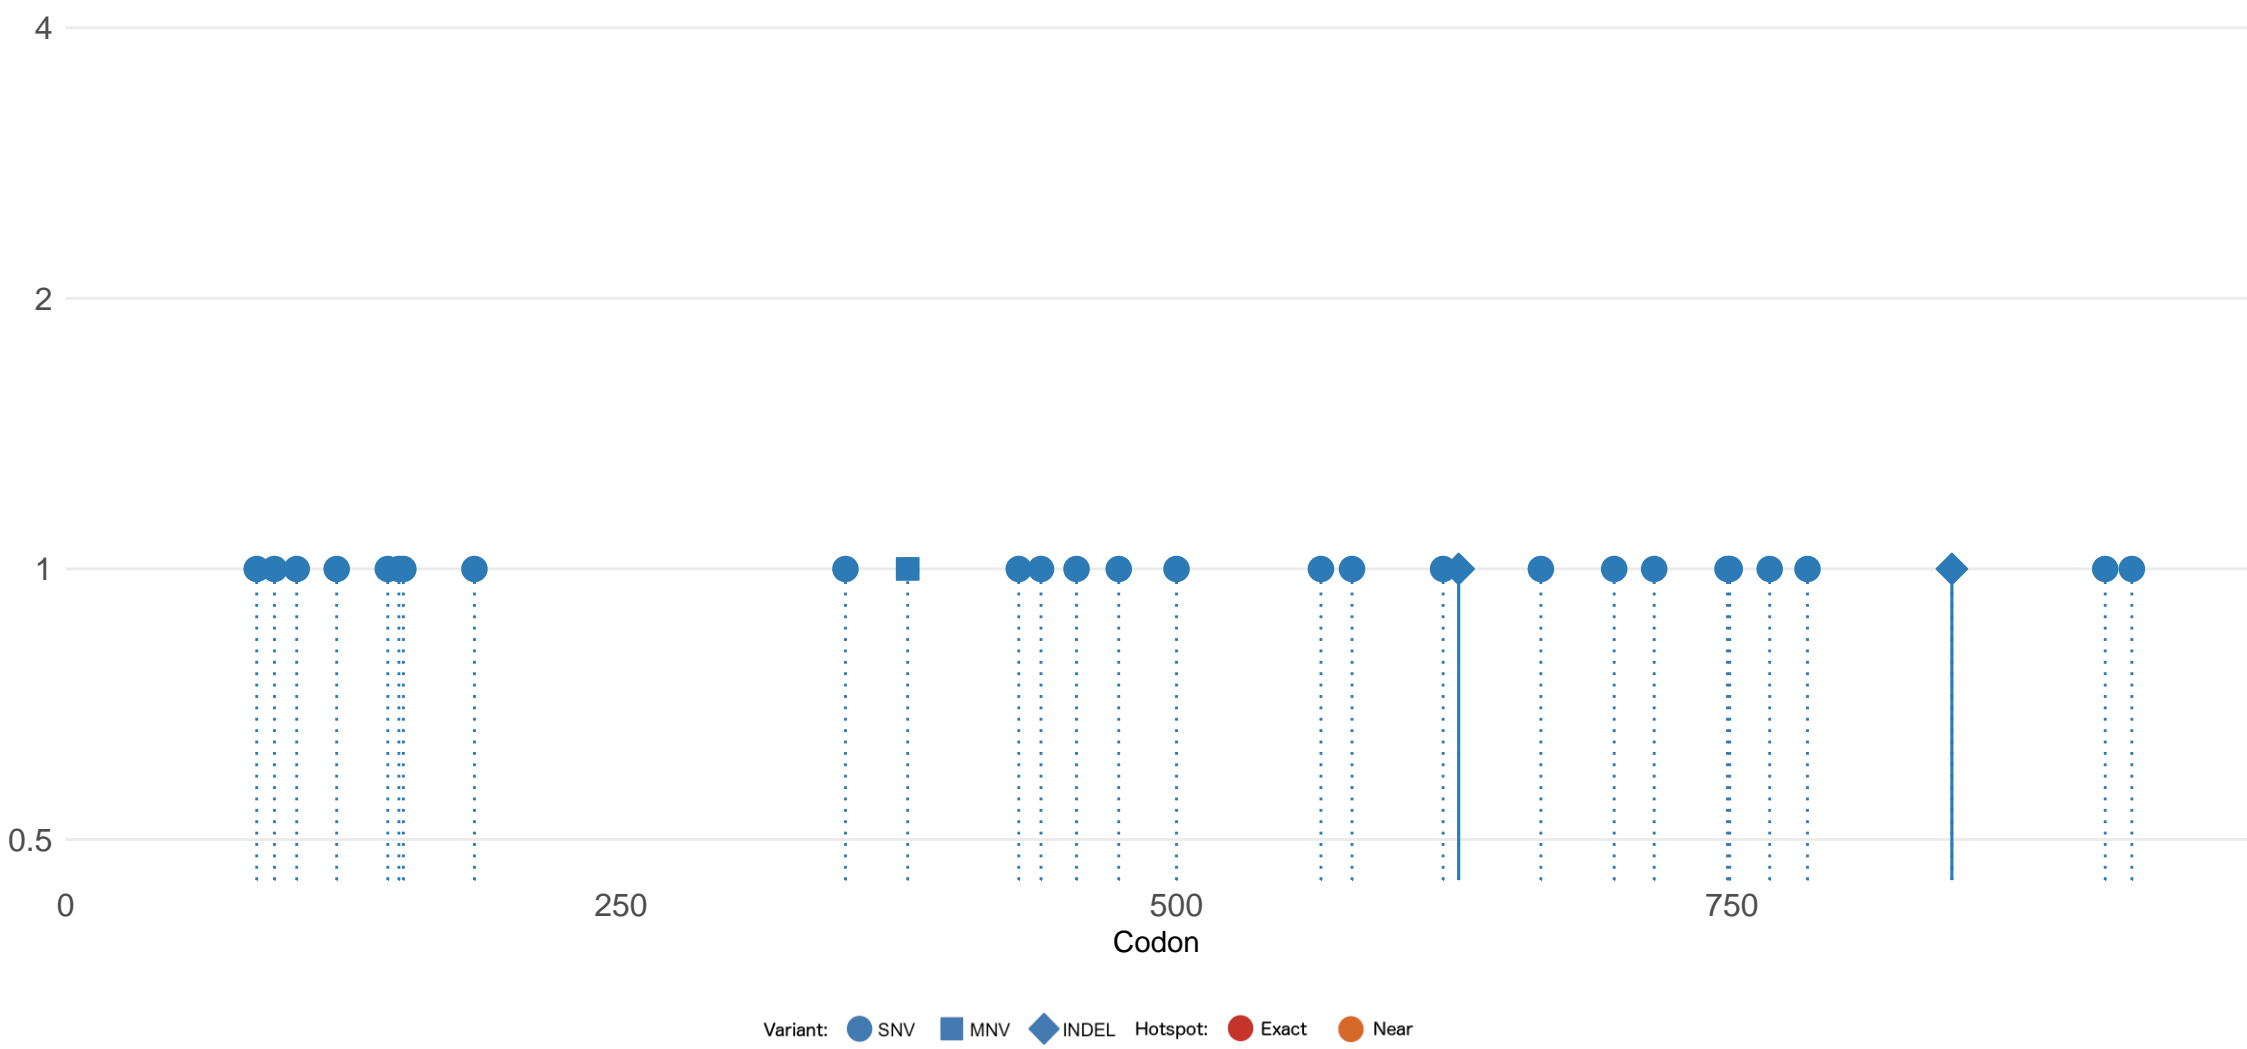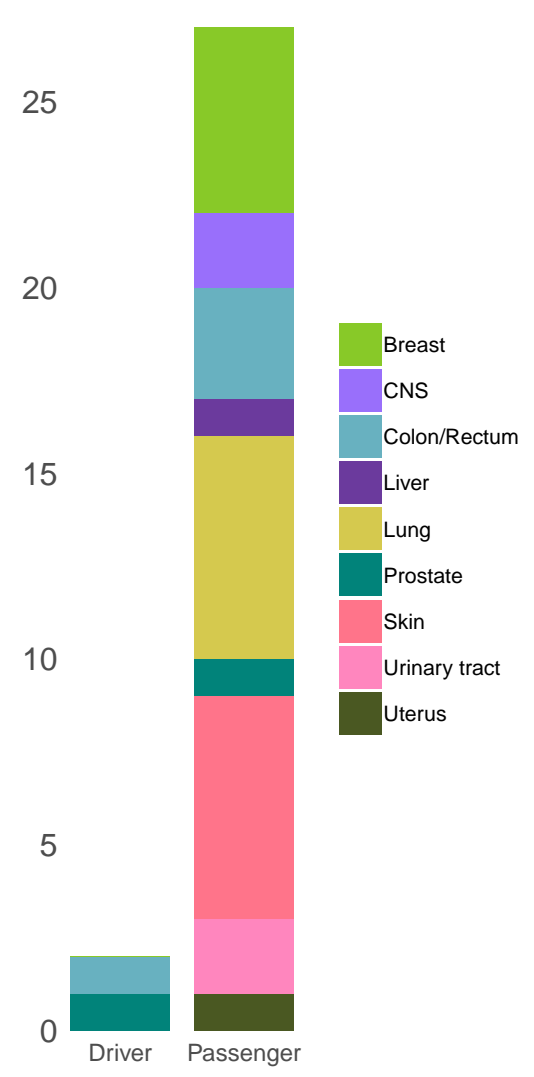

# CSF3R Variants

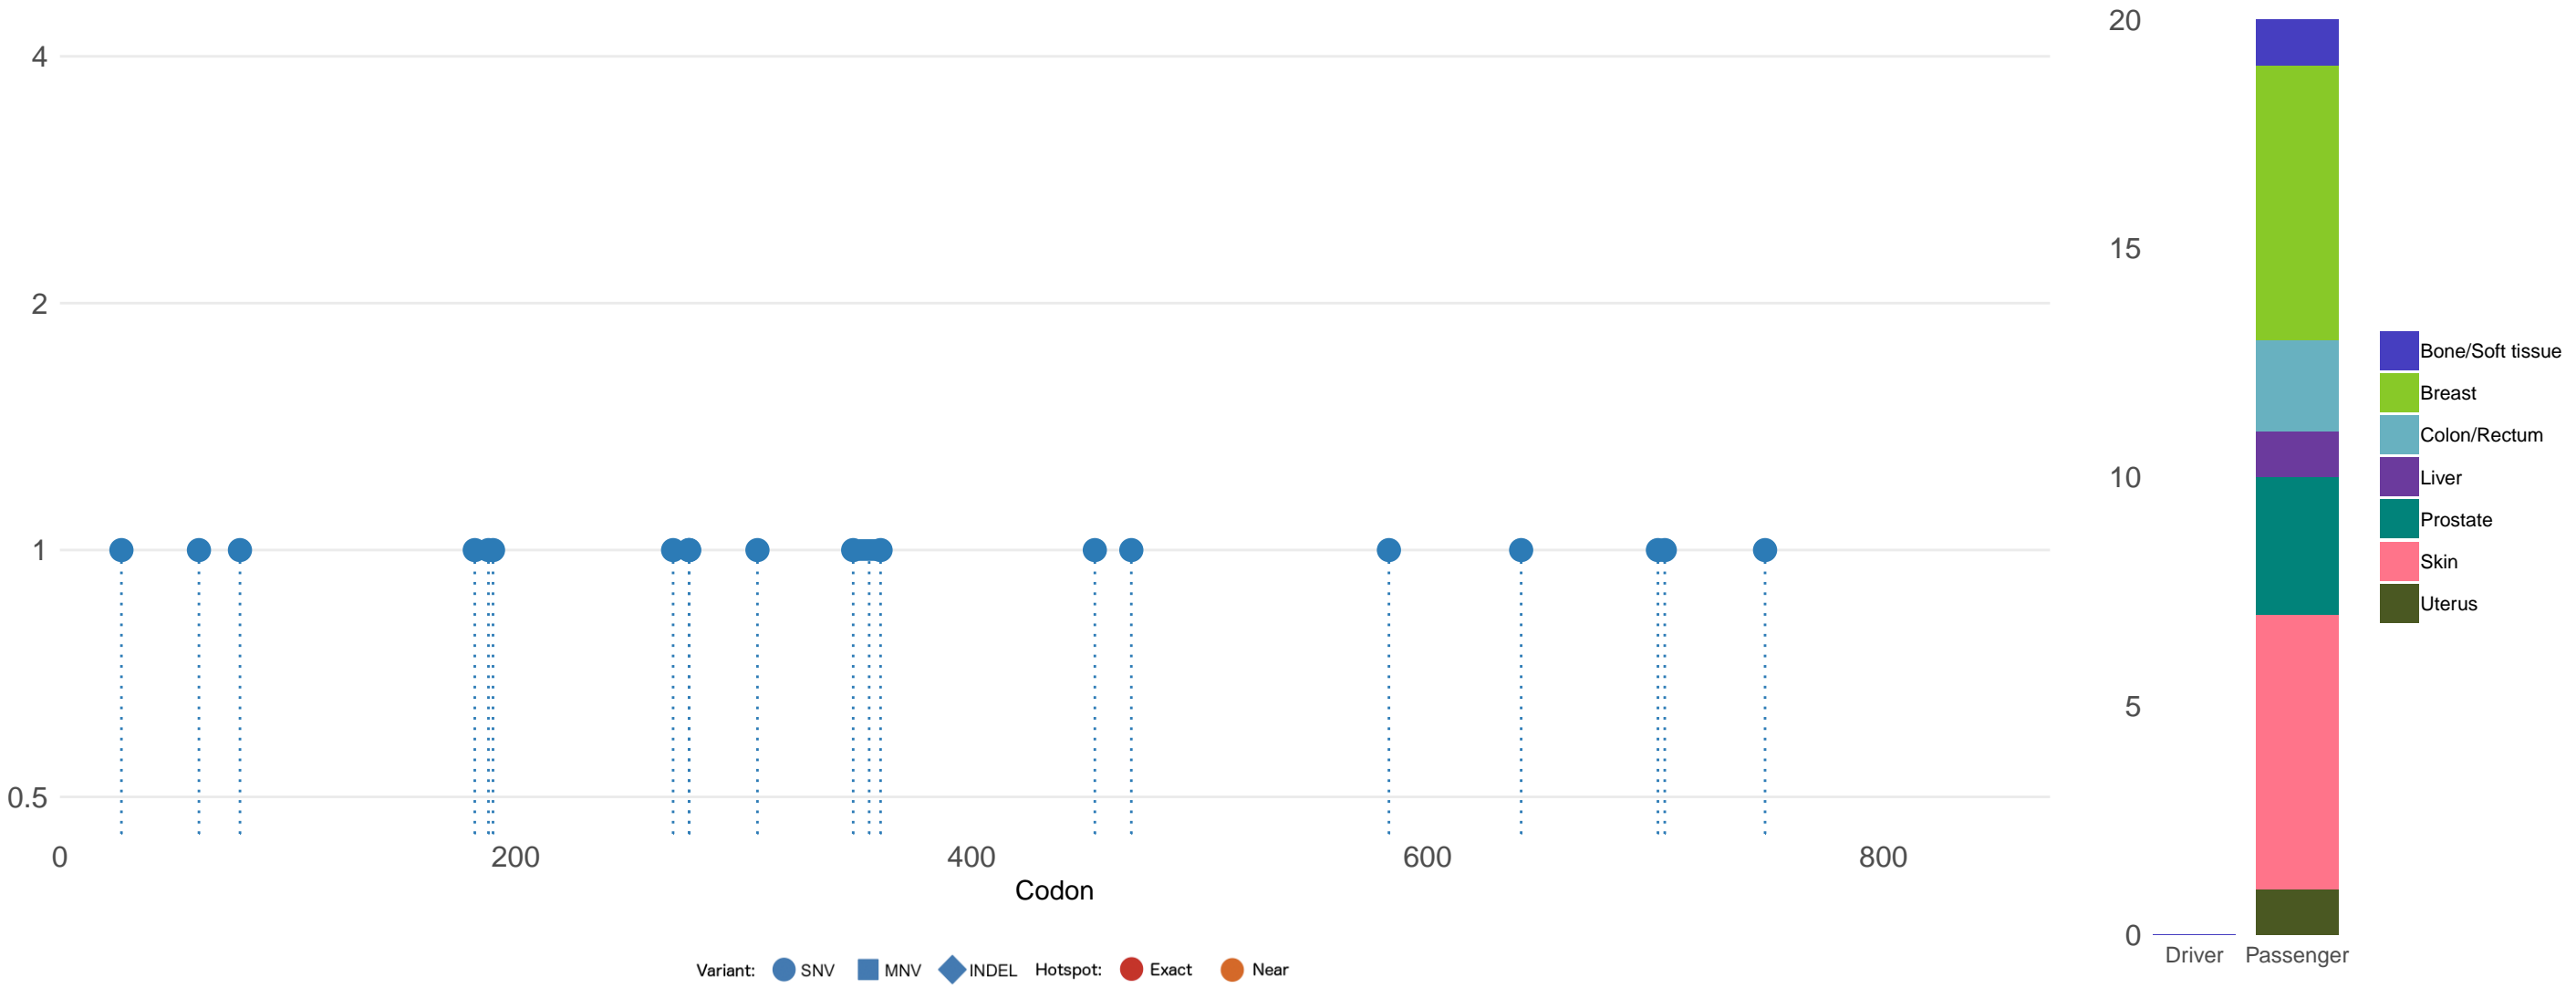

# CTNNB1 Variants

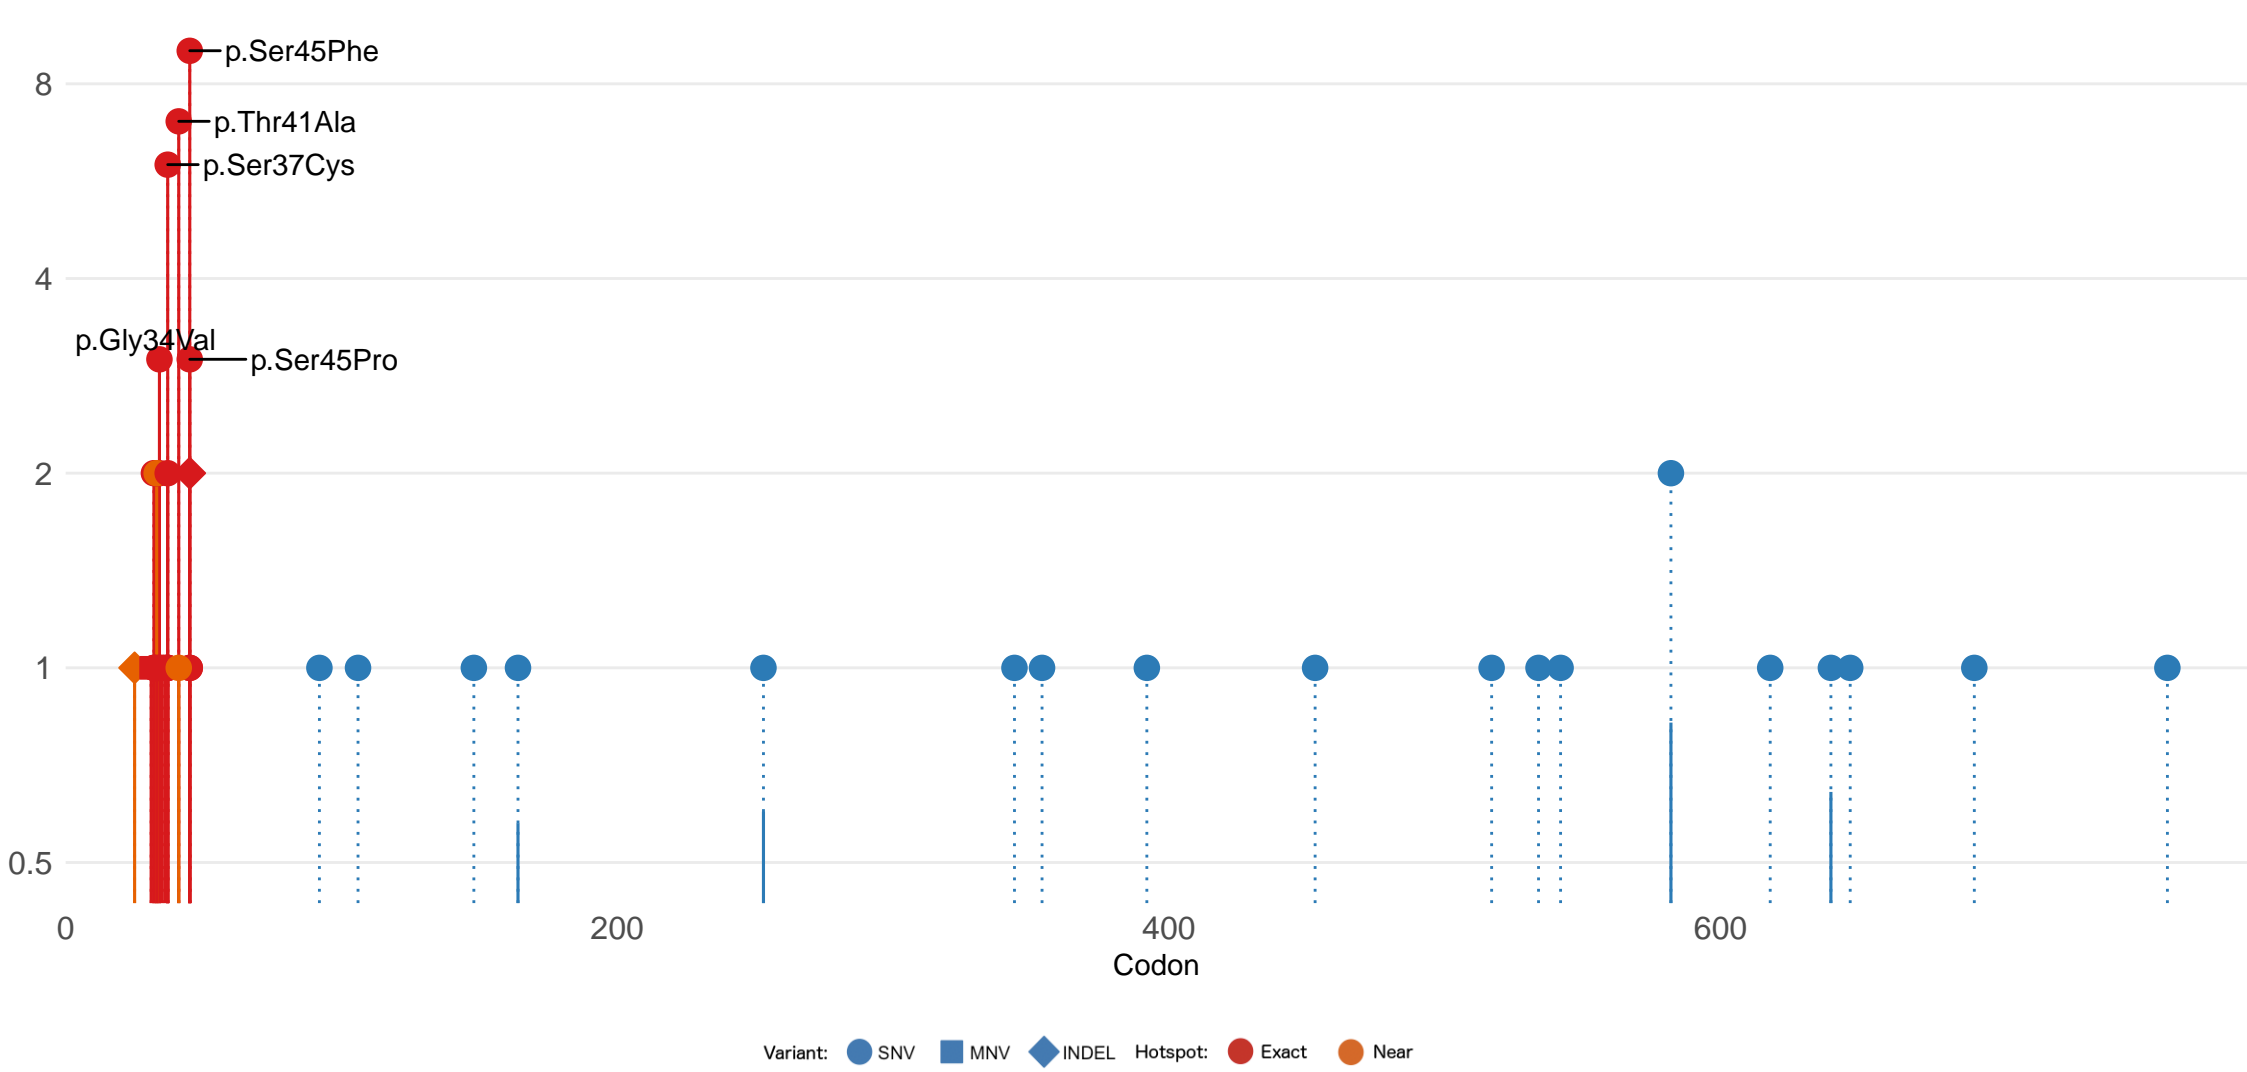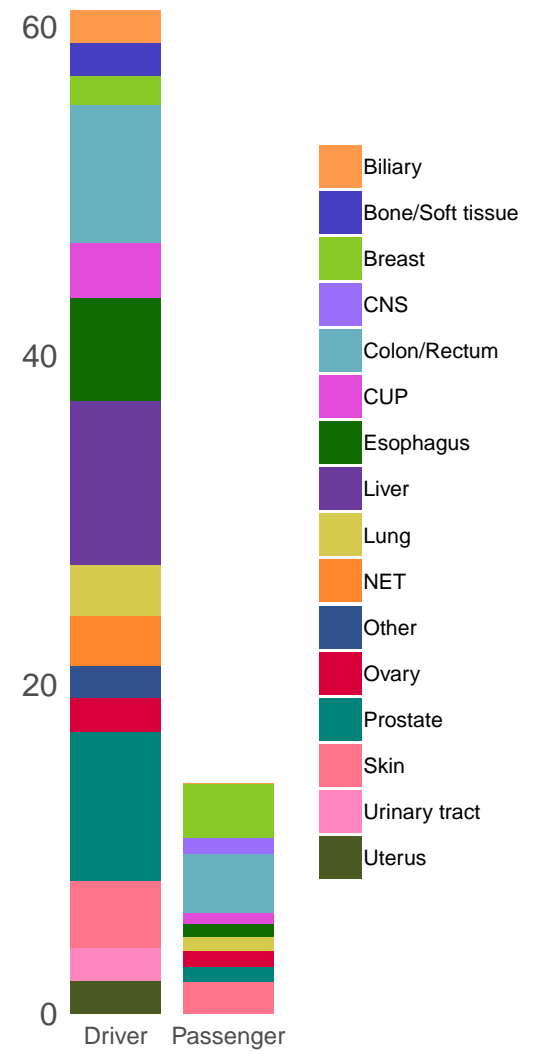

# CUX1 Variants

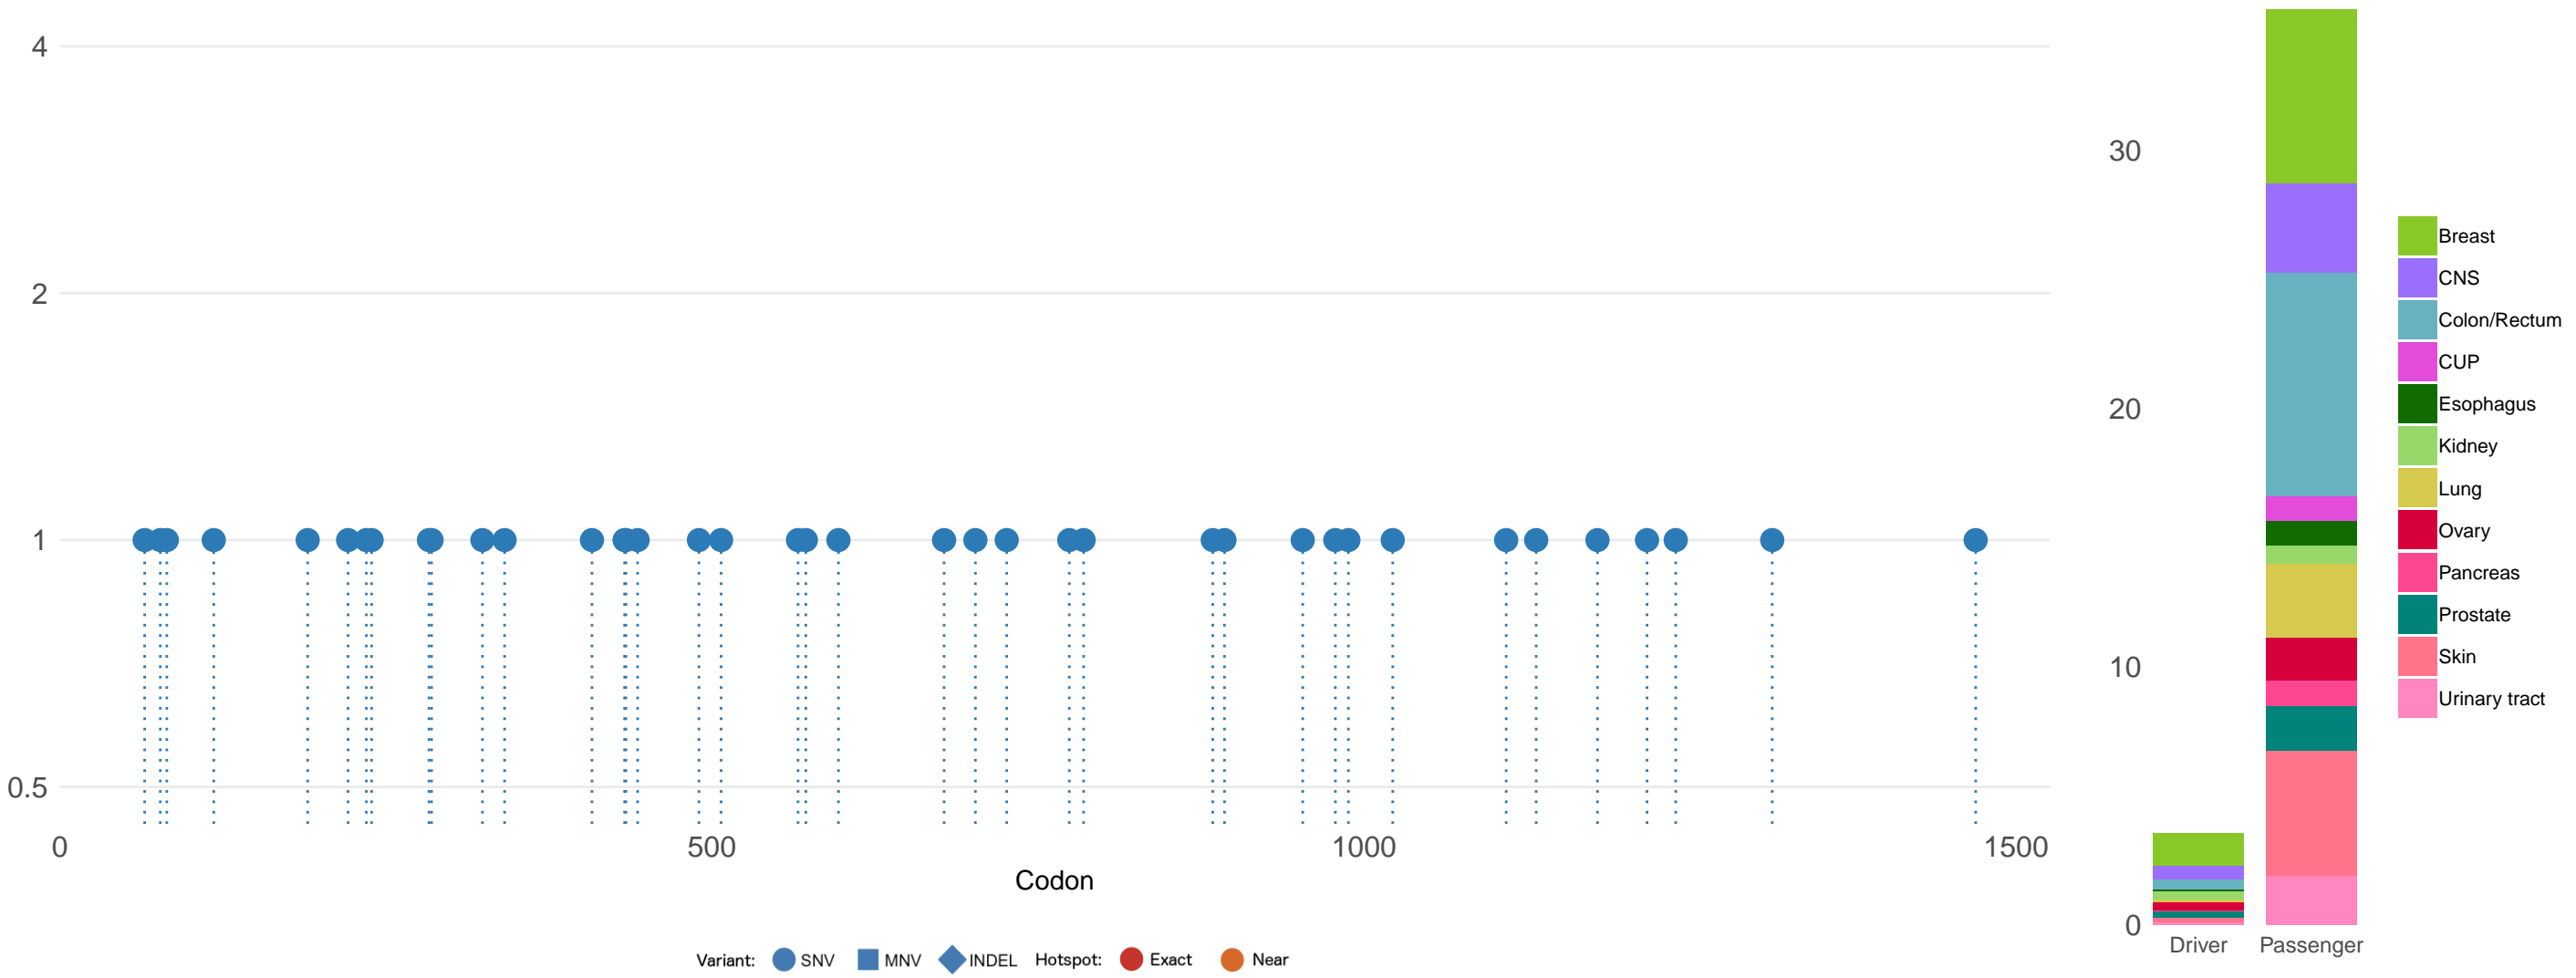

# CXCR4 Variants

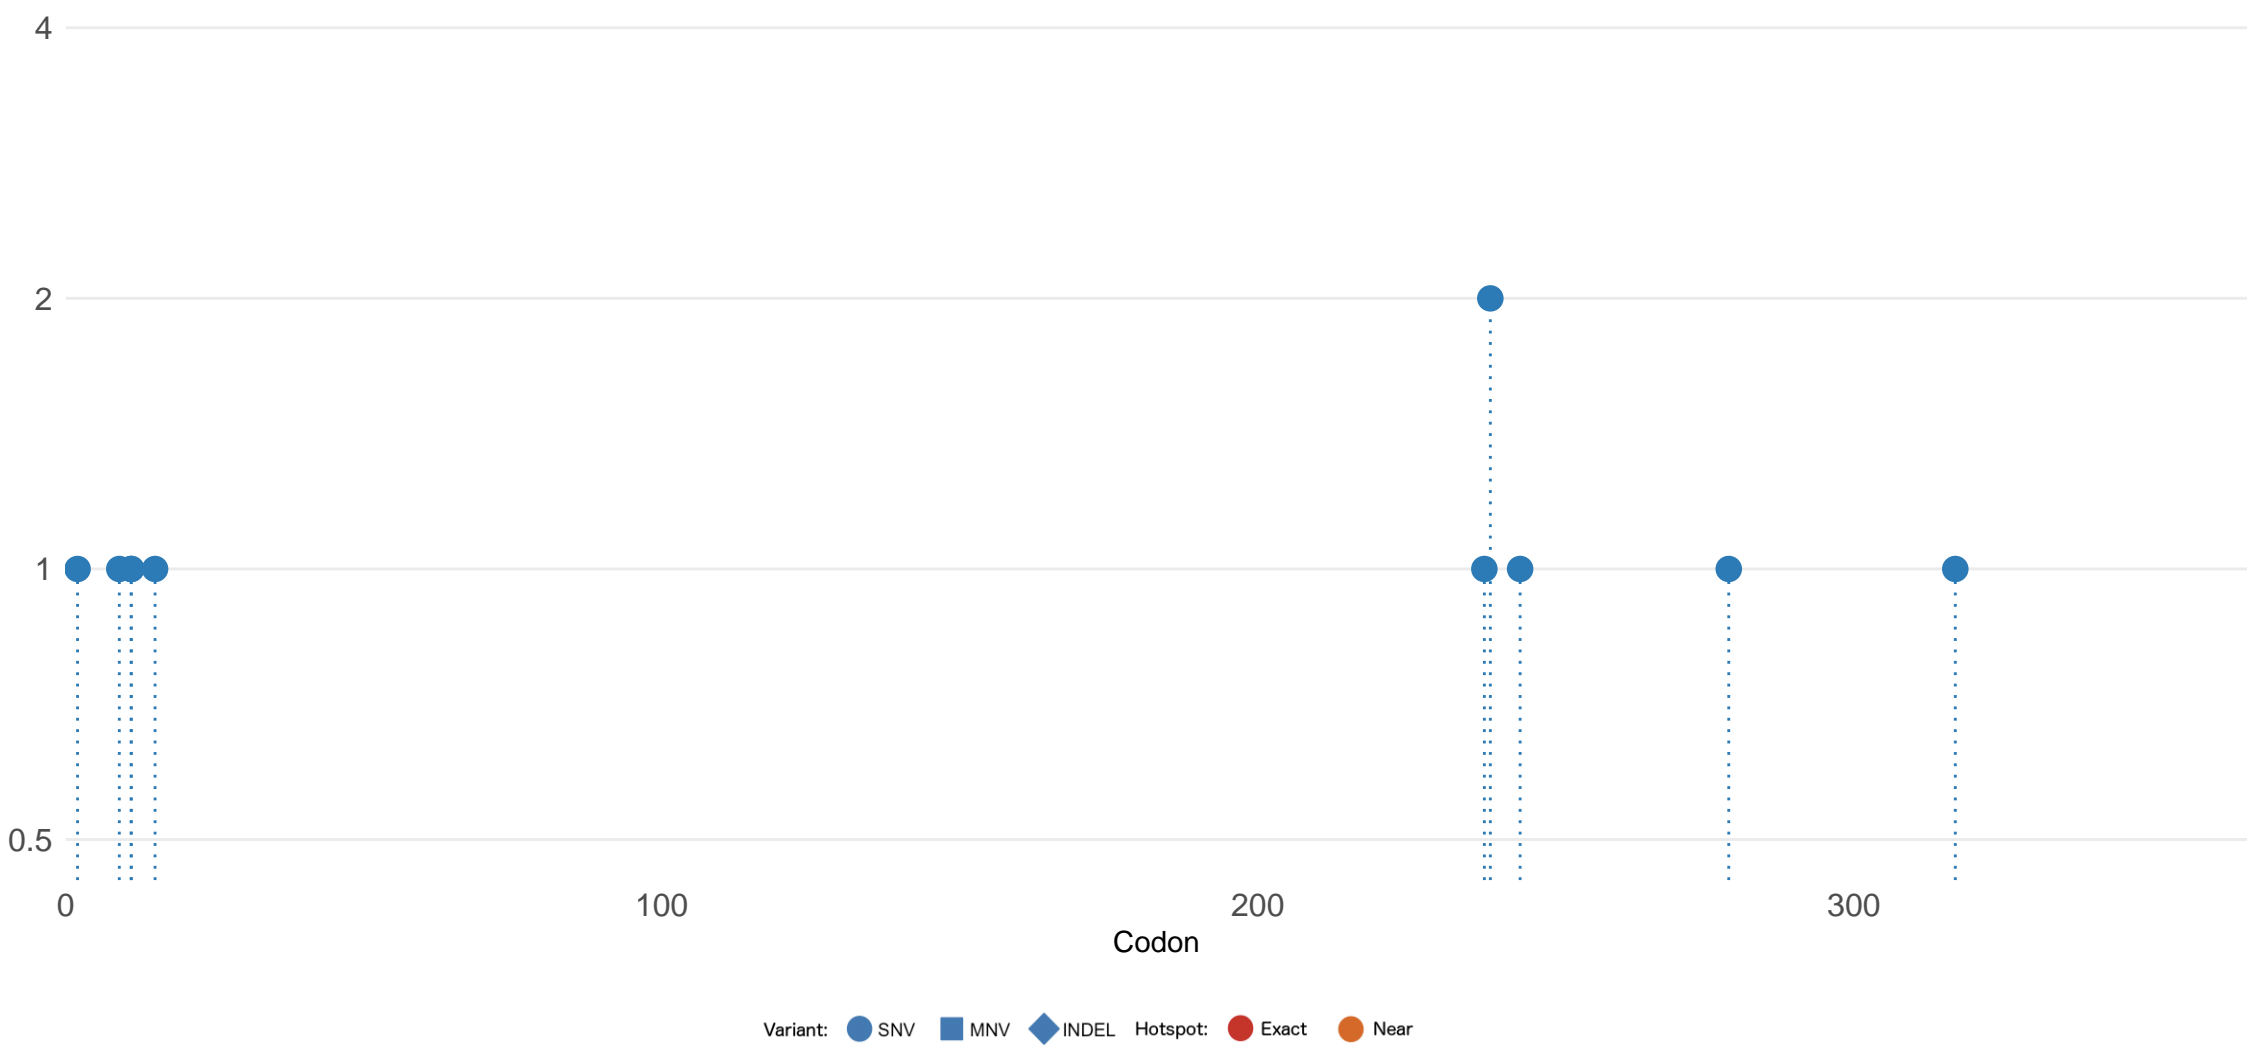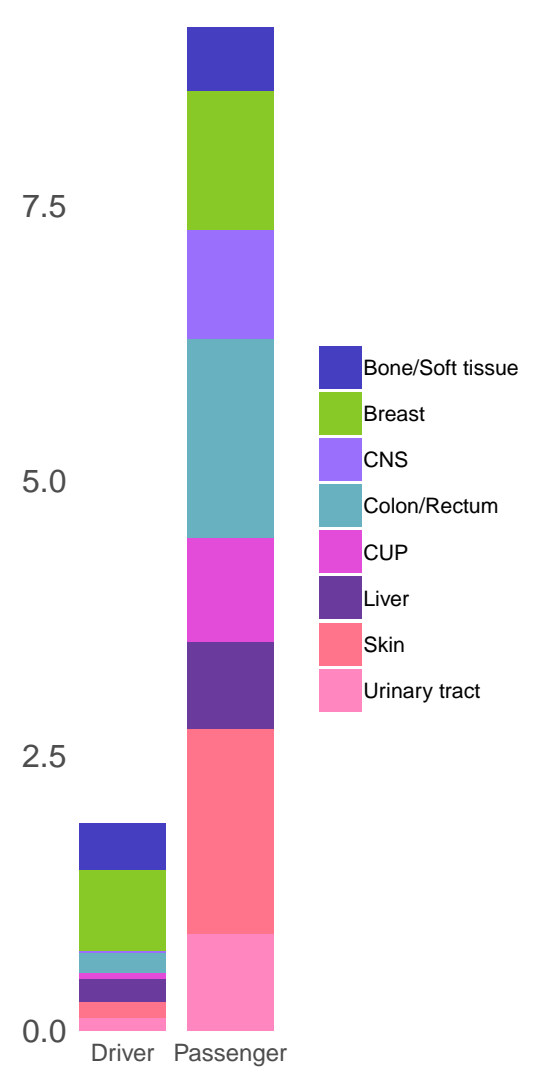



# DDR2 Variants

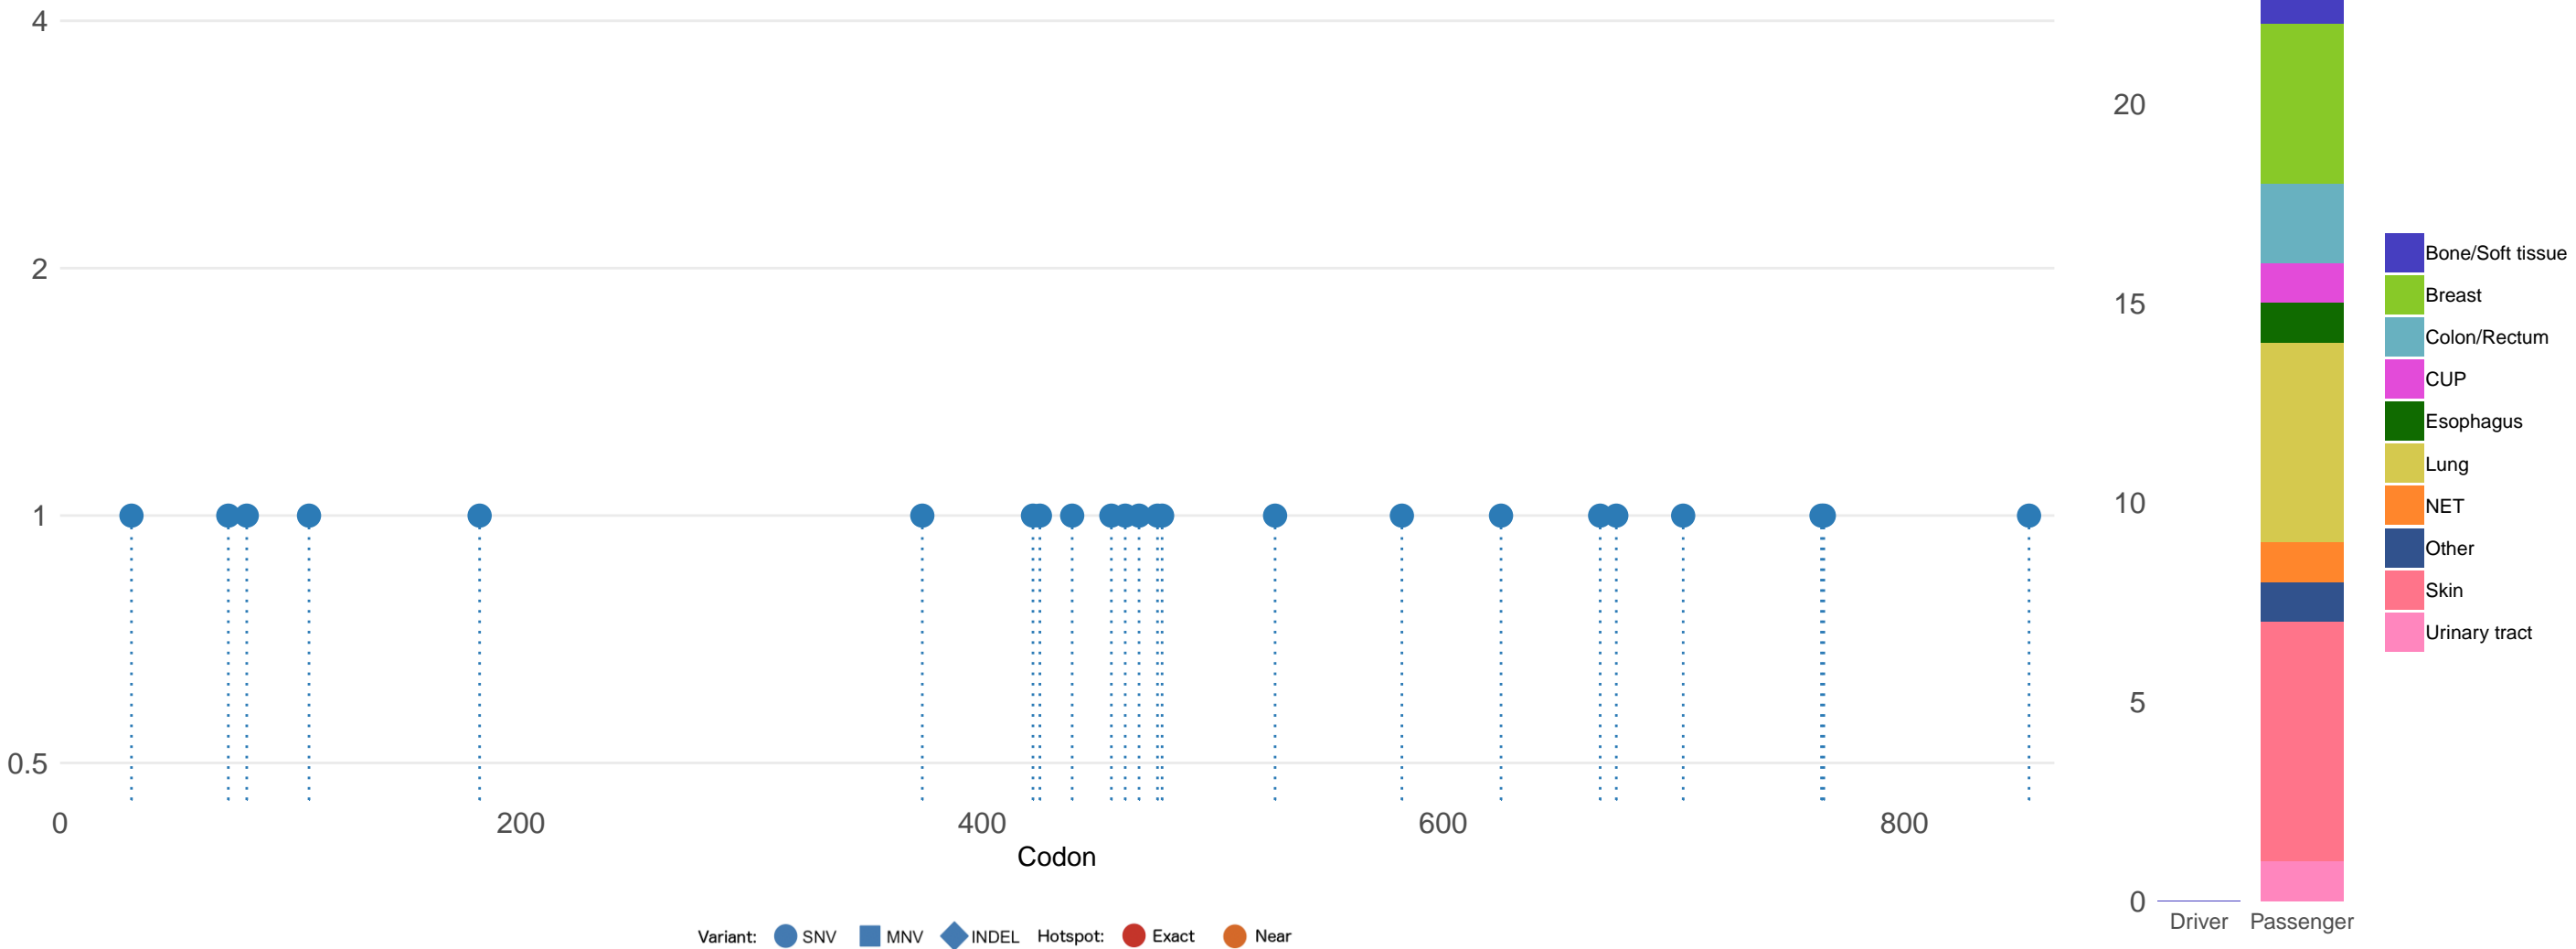

# DGCR8 Variants

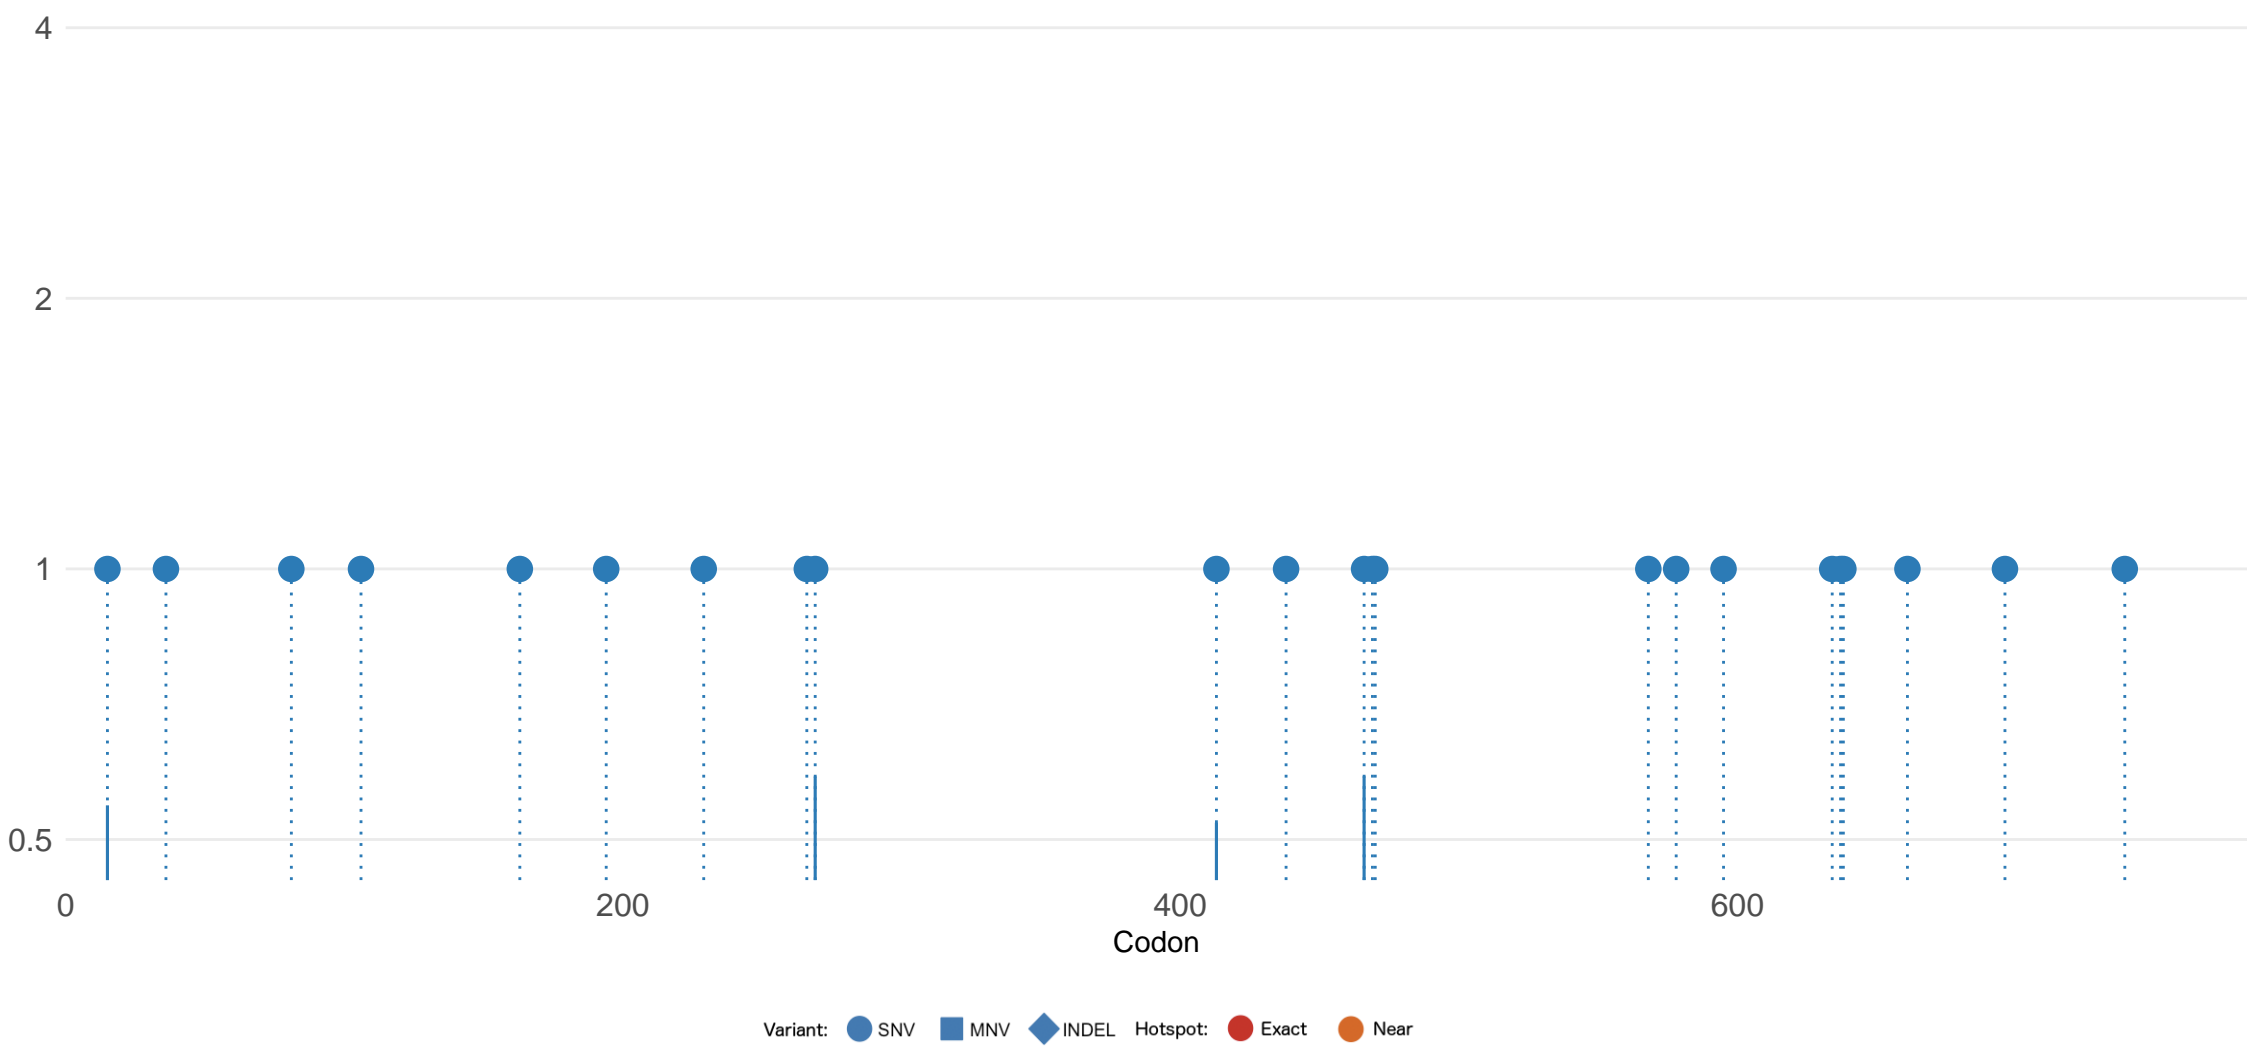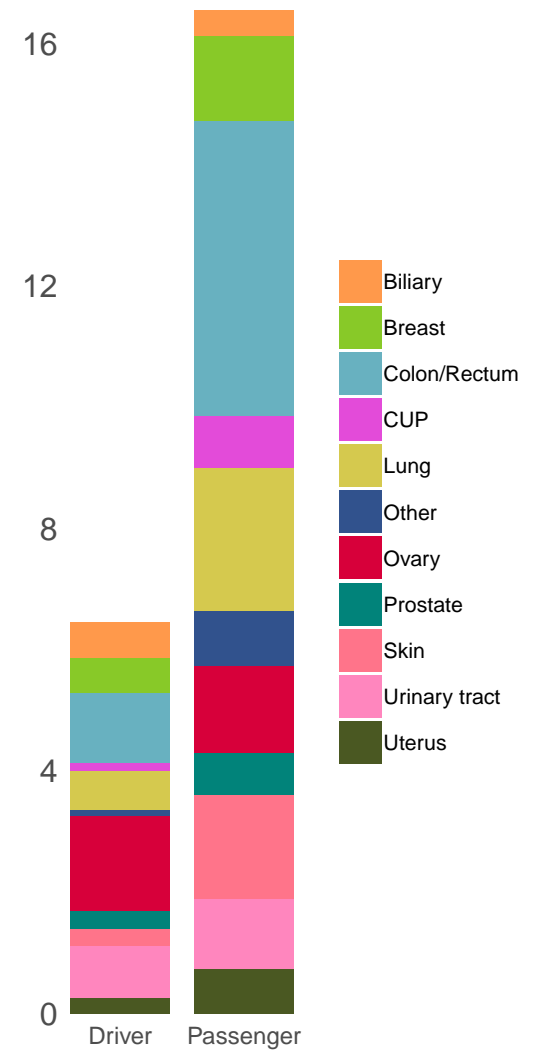

# EEF1A1 Variants

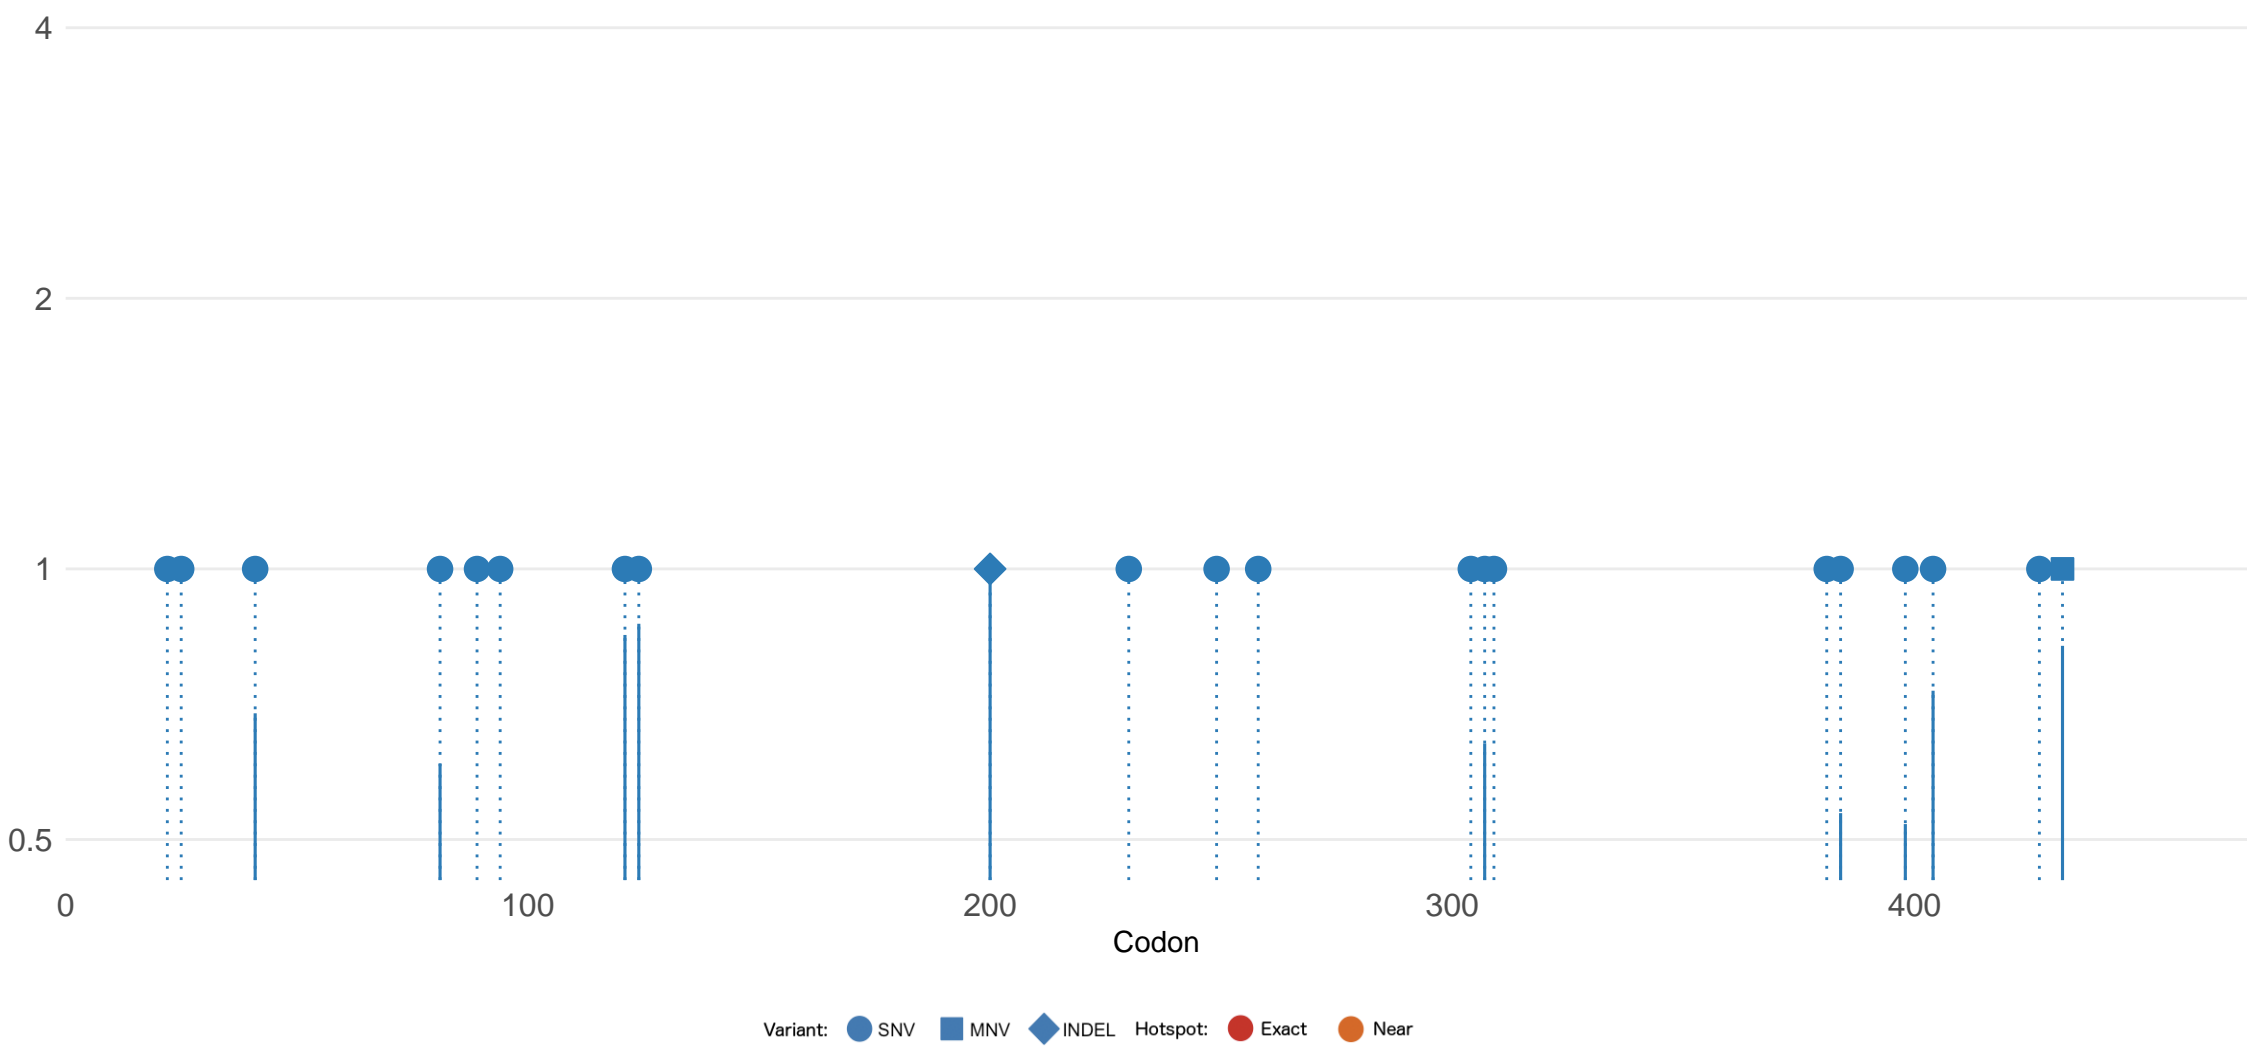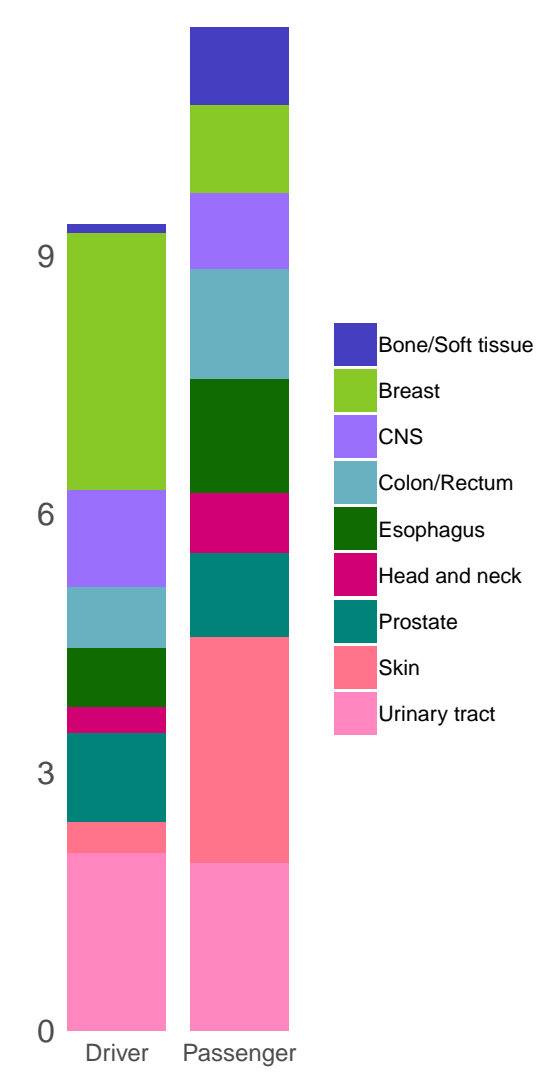

# EGFR Variants

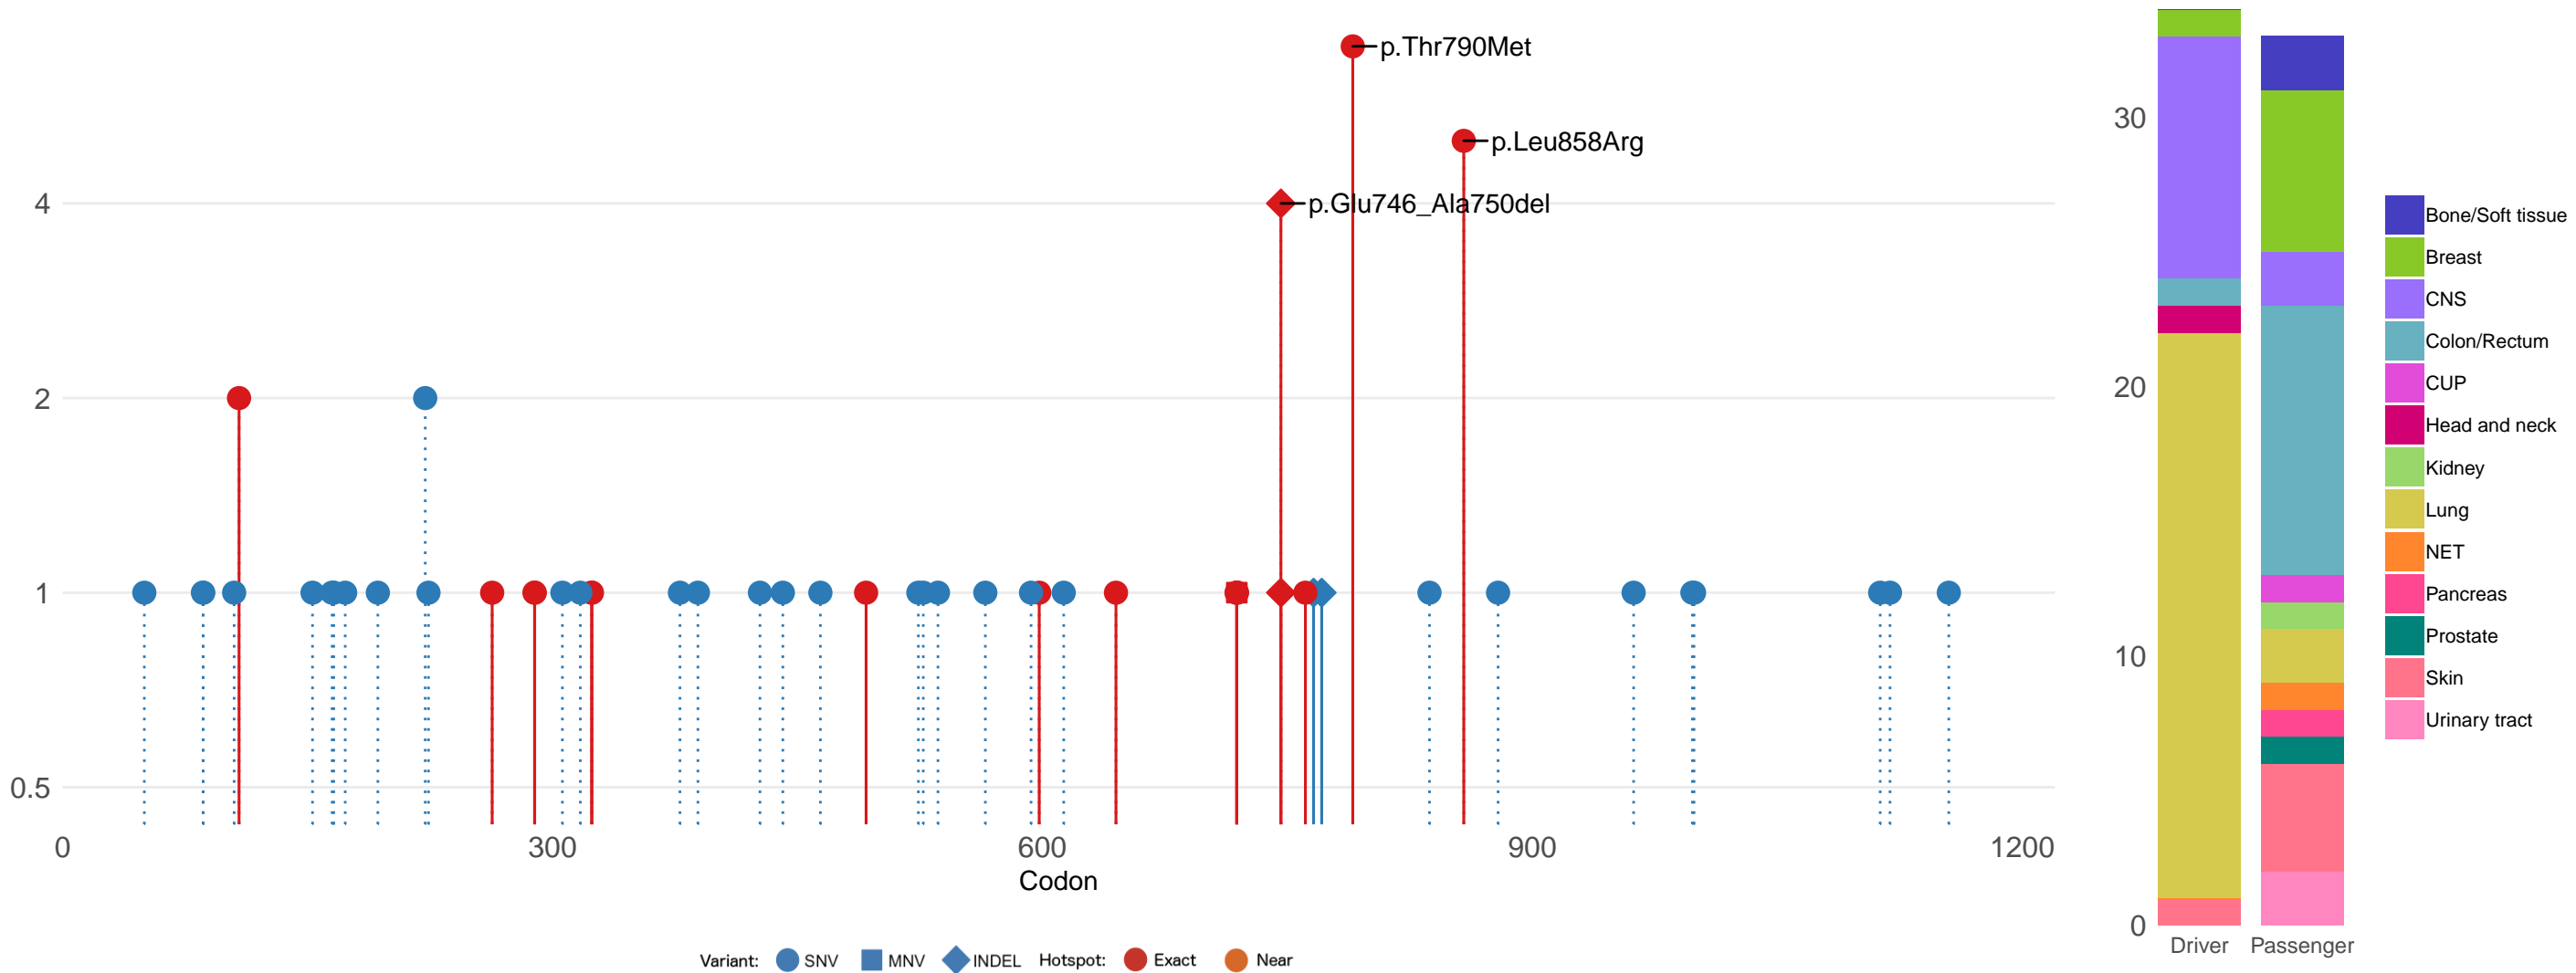

# EPAS1 Variants

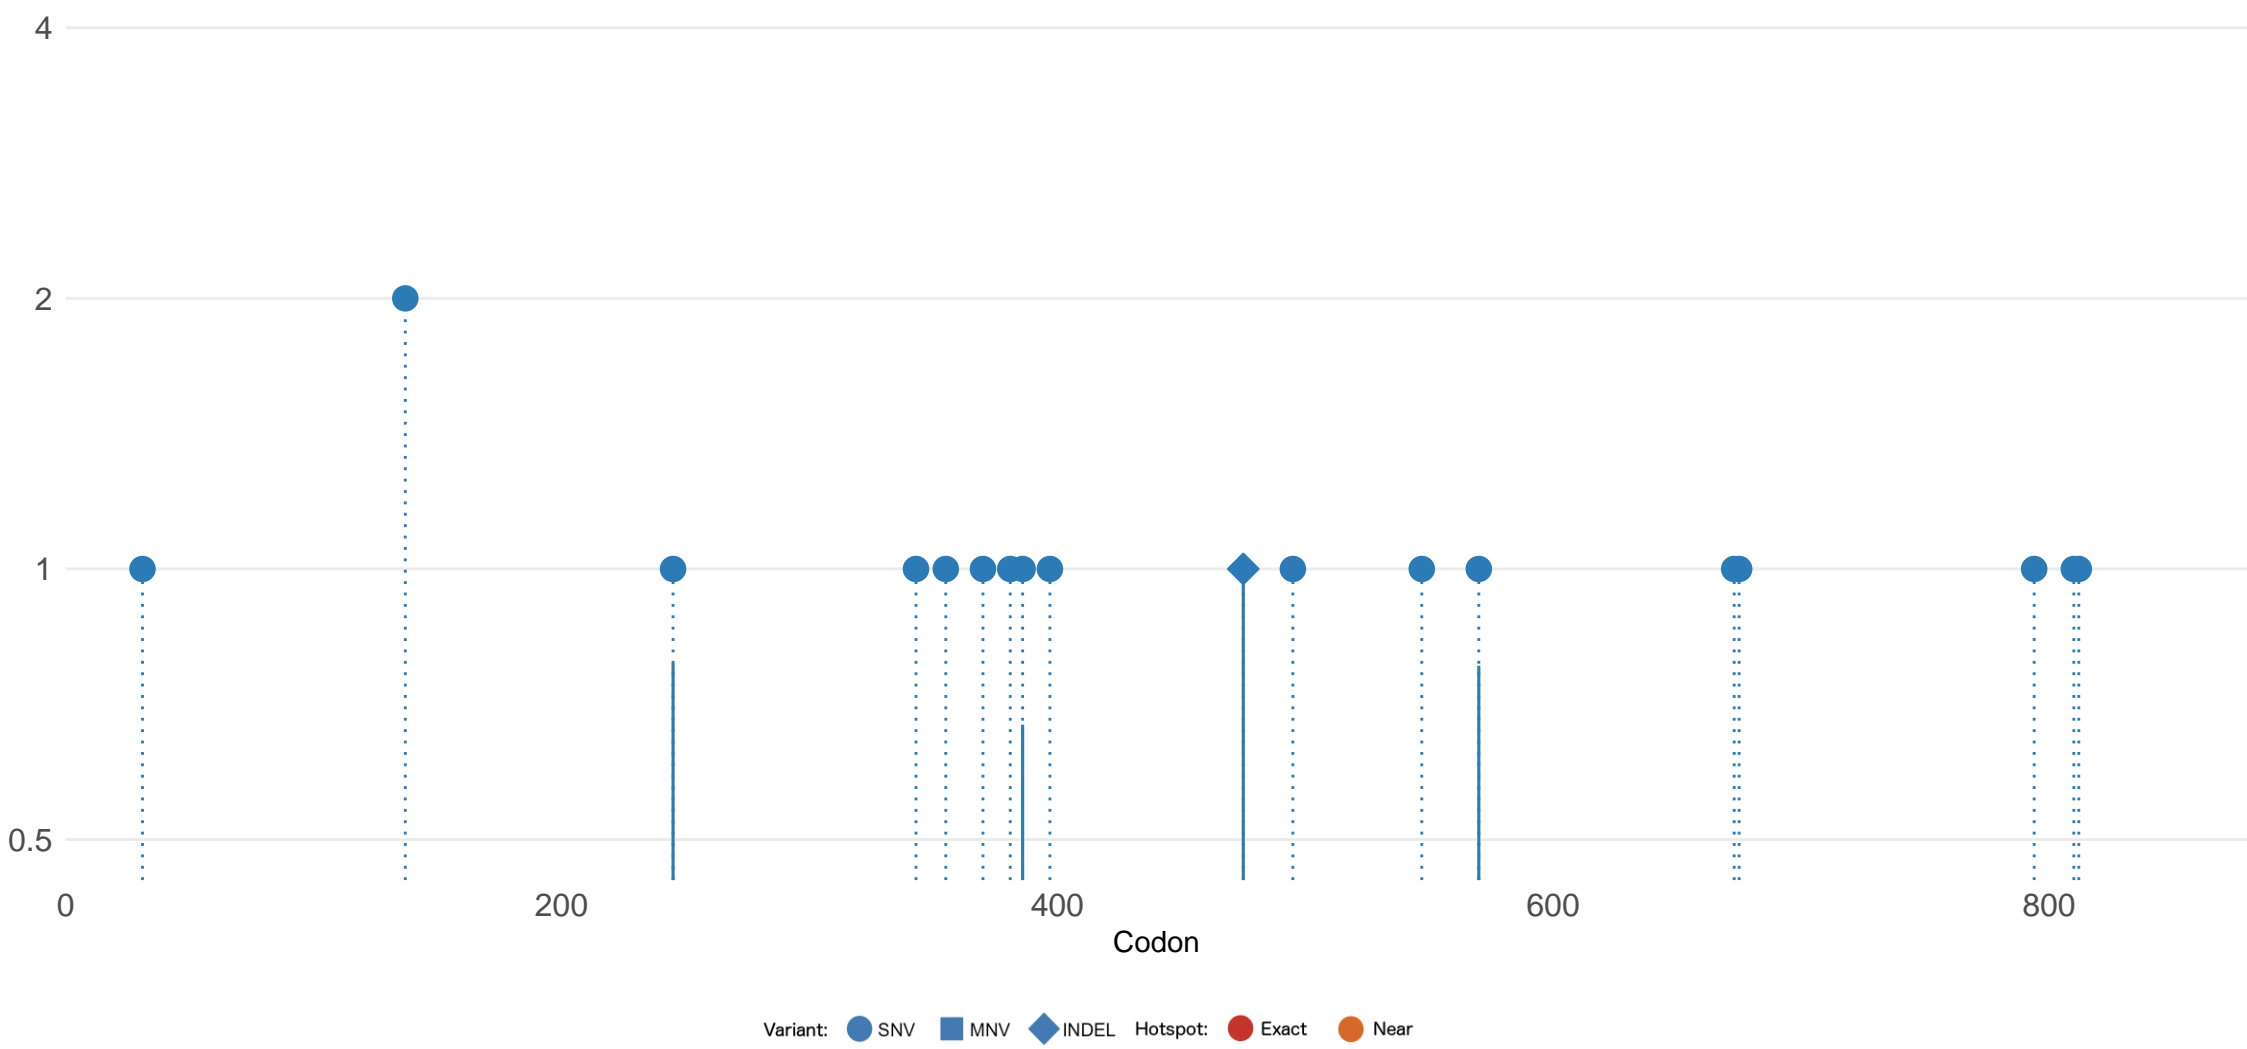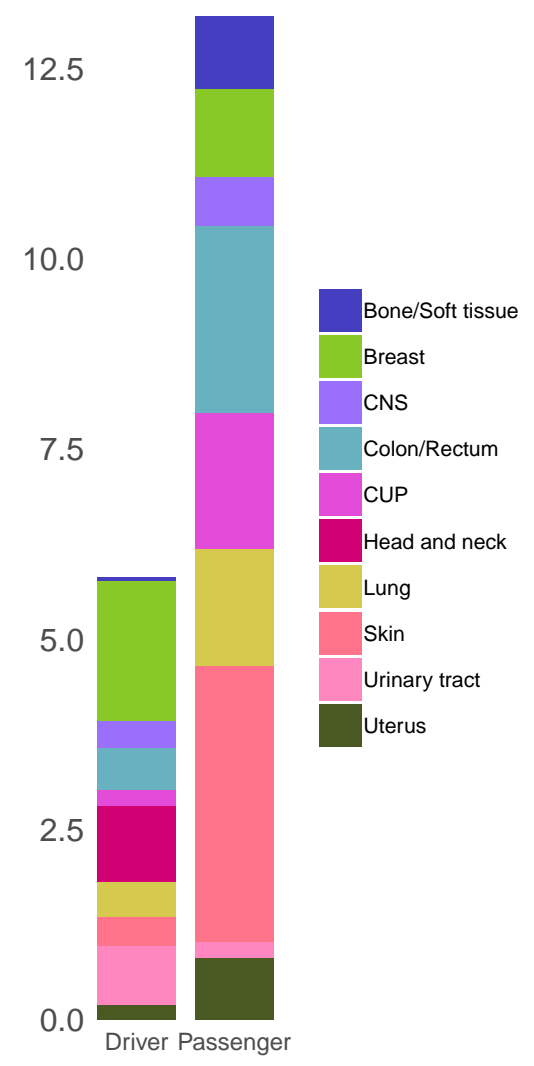

# ERBB2 Variants

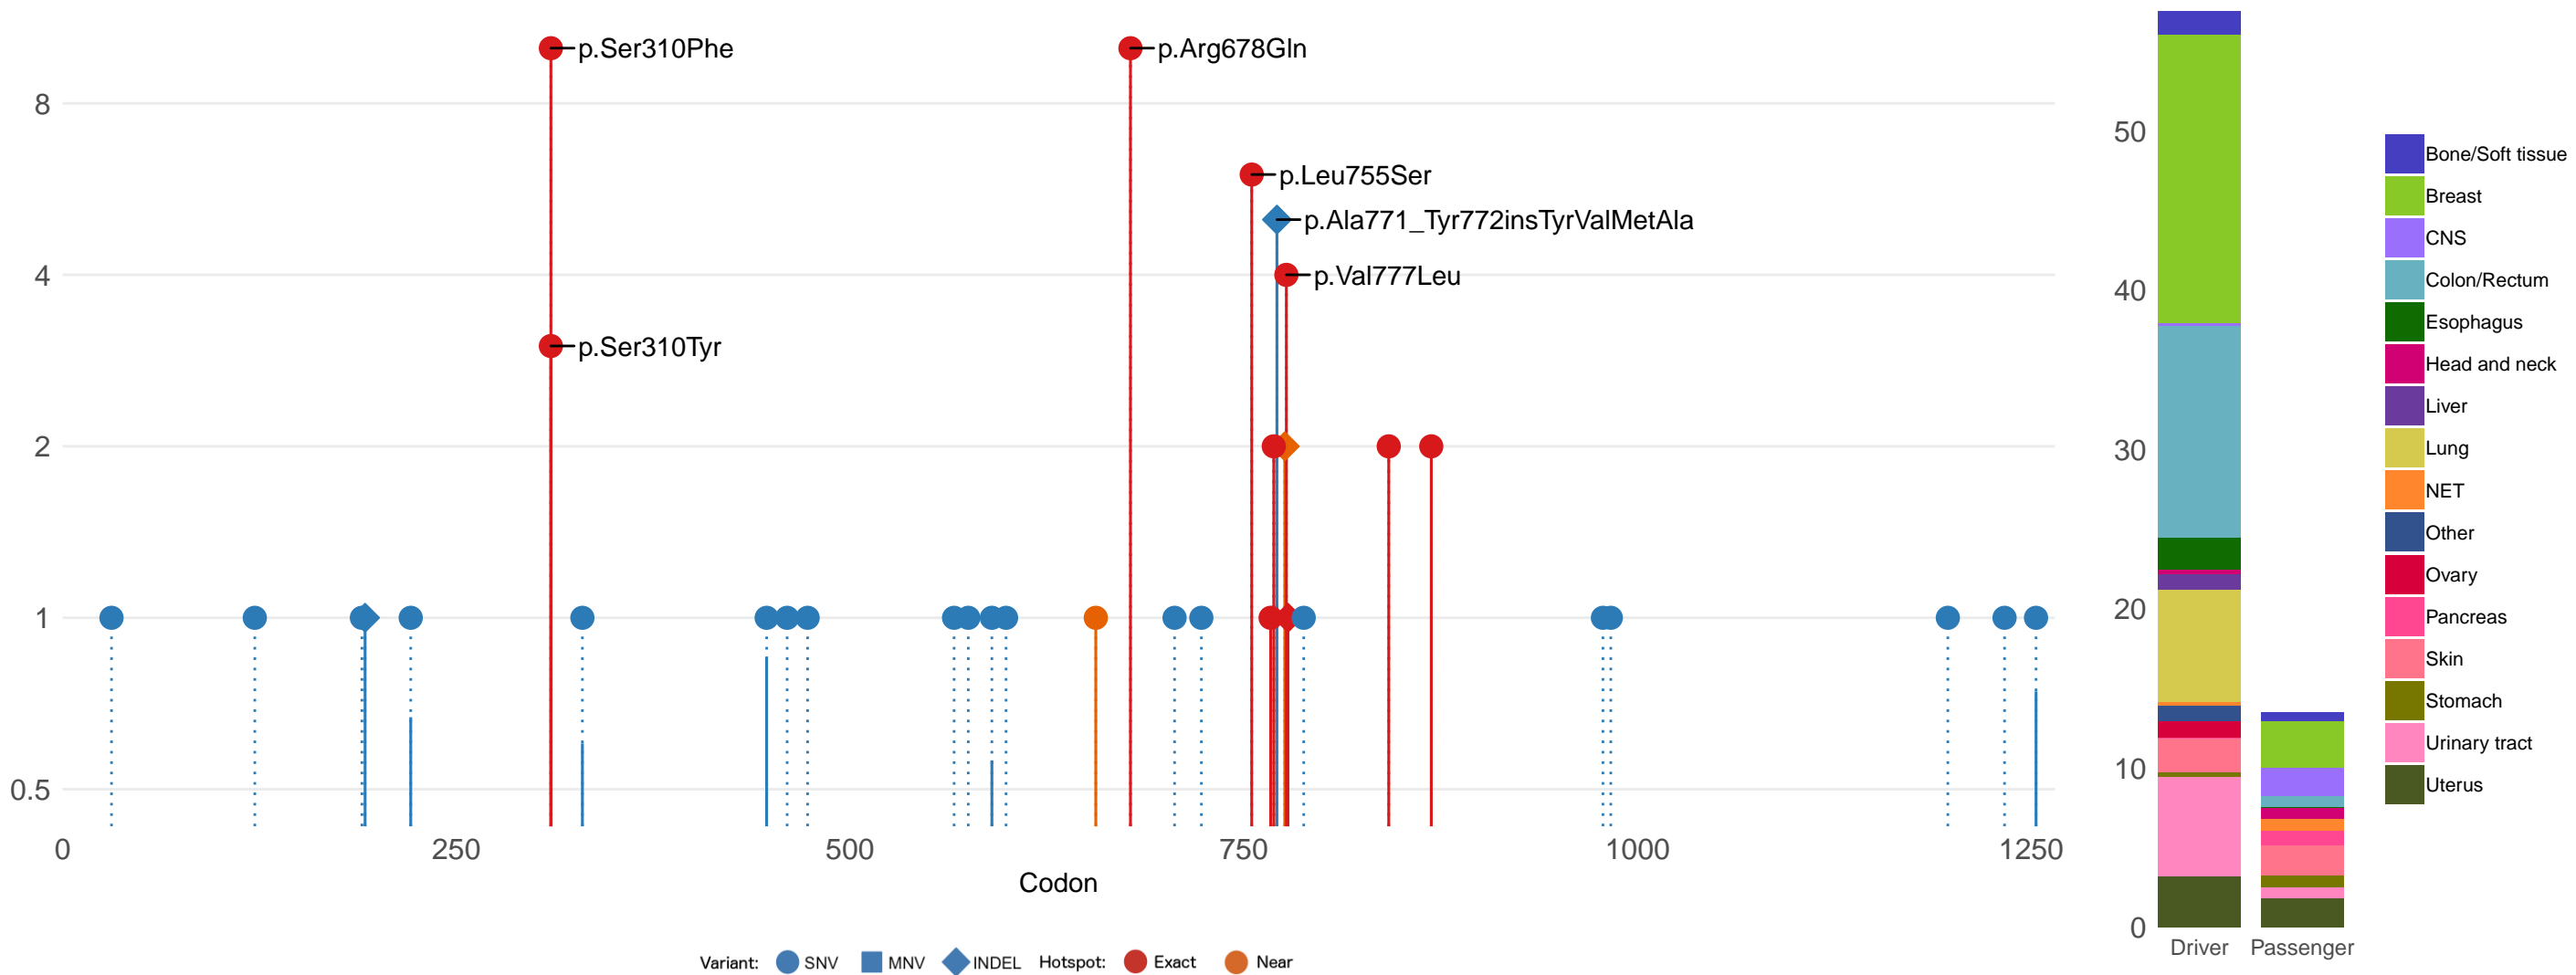

# ERBB3 Variants

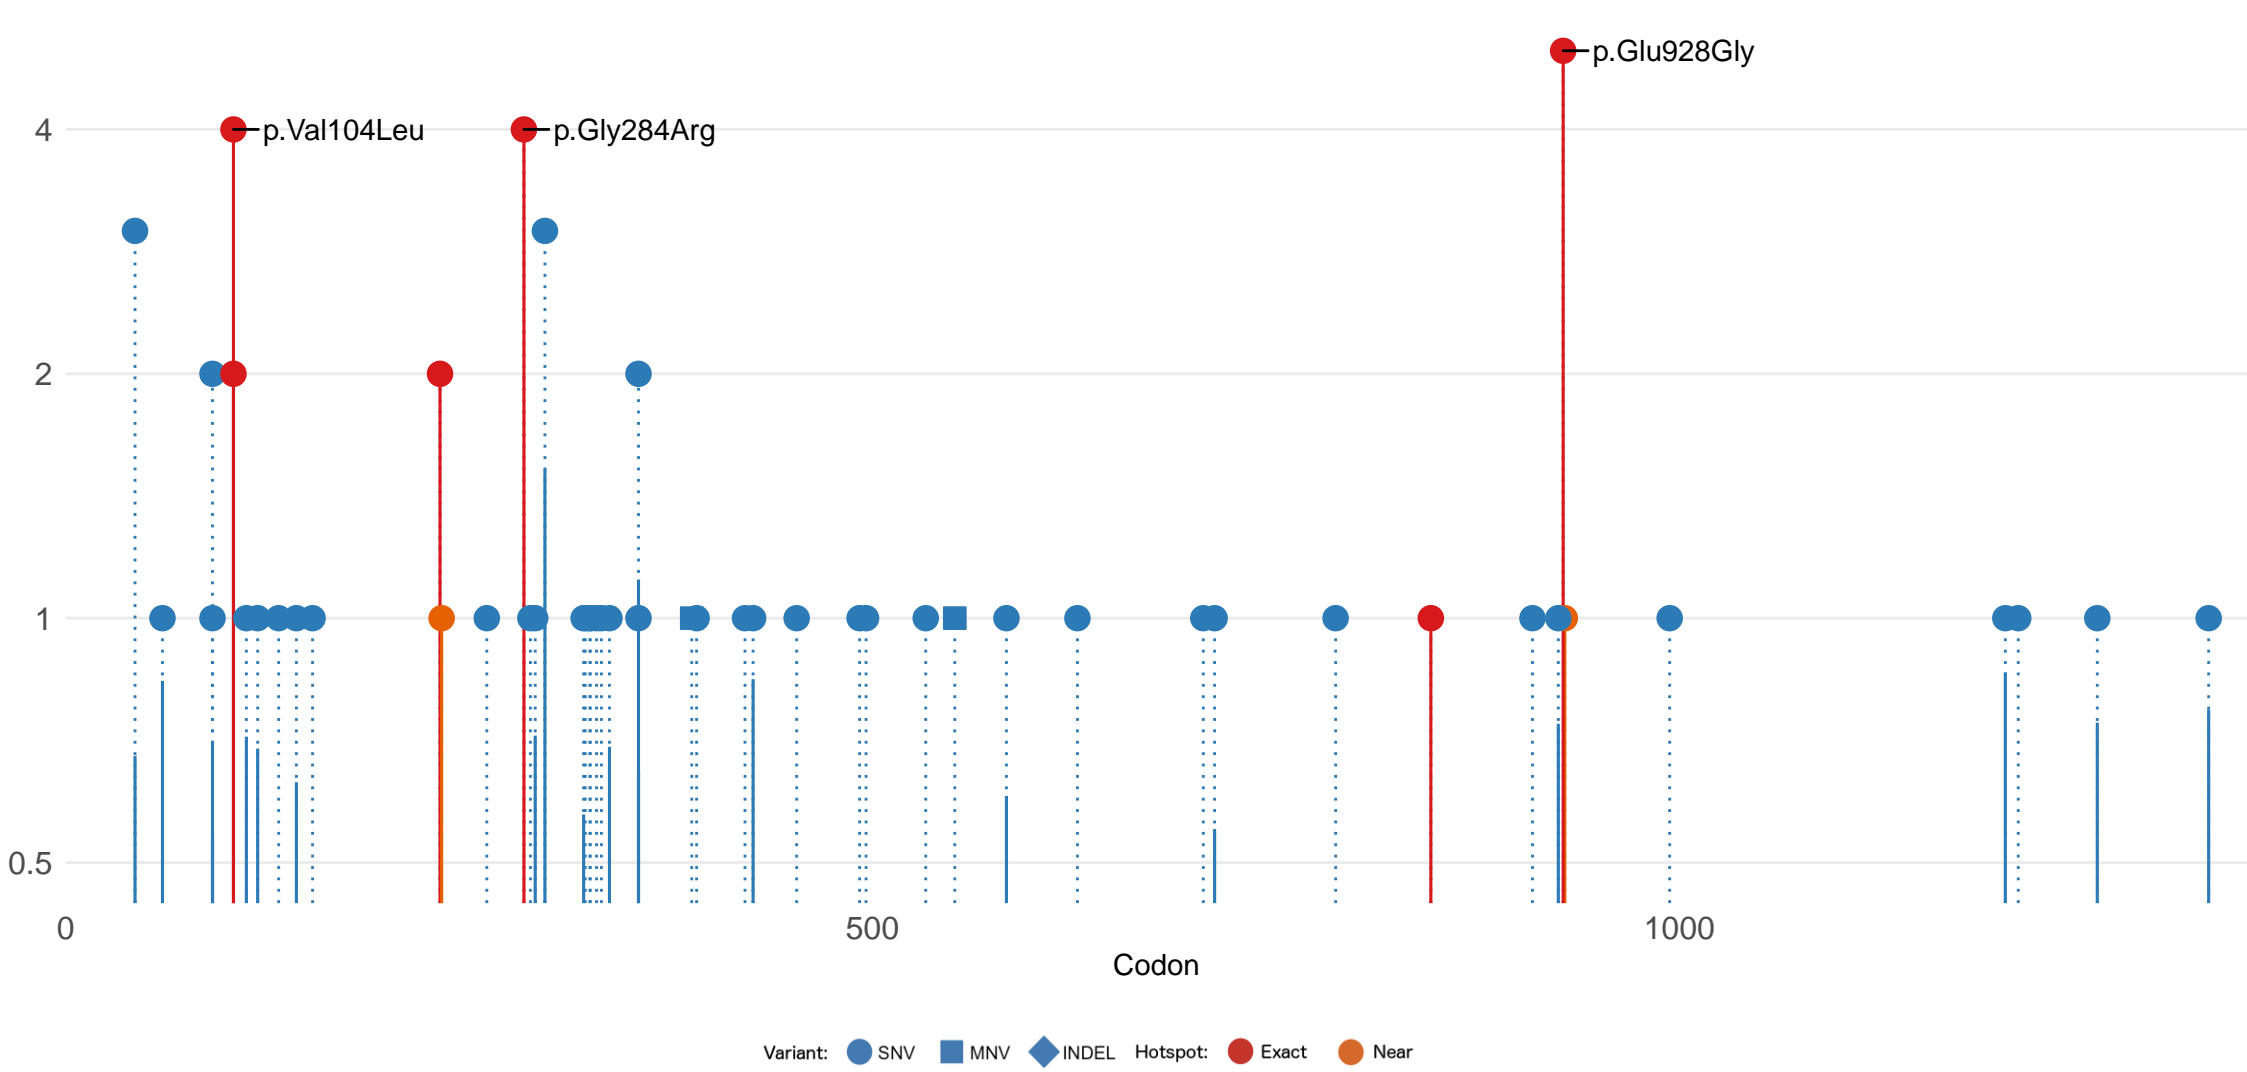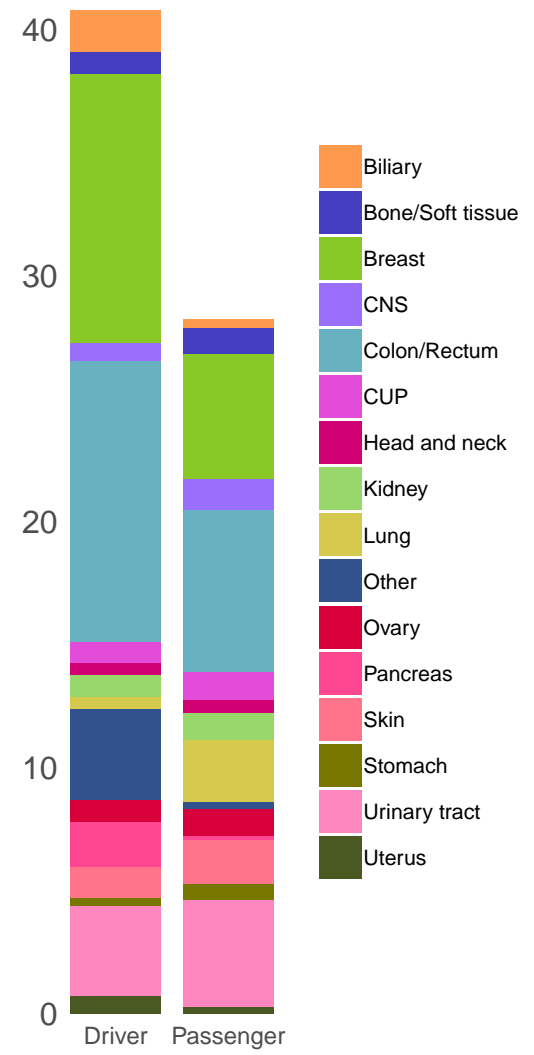

# ERCC2 Variants

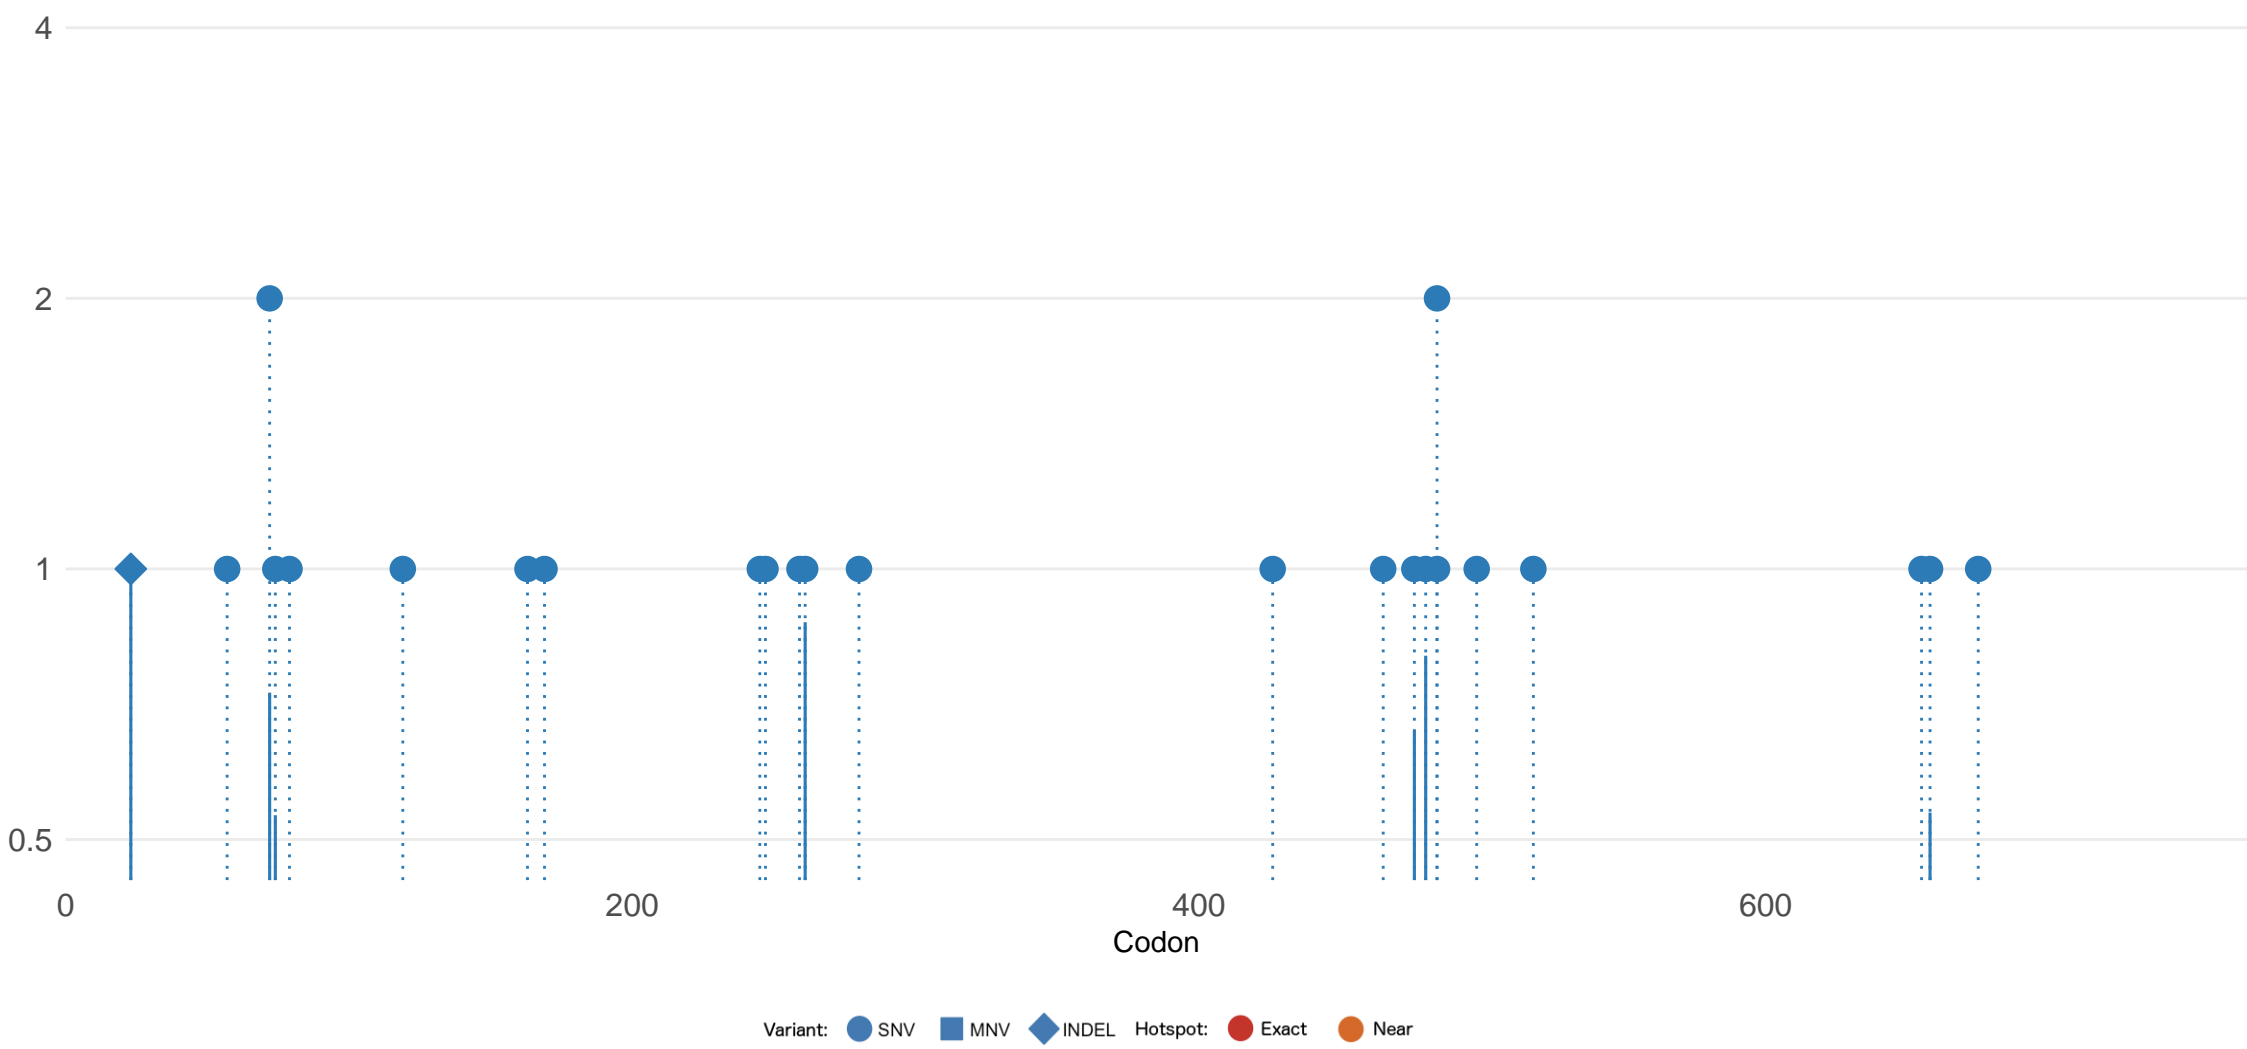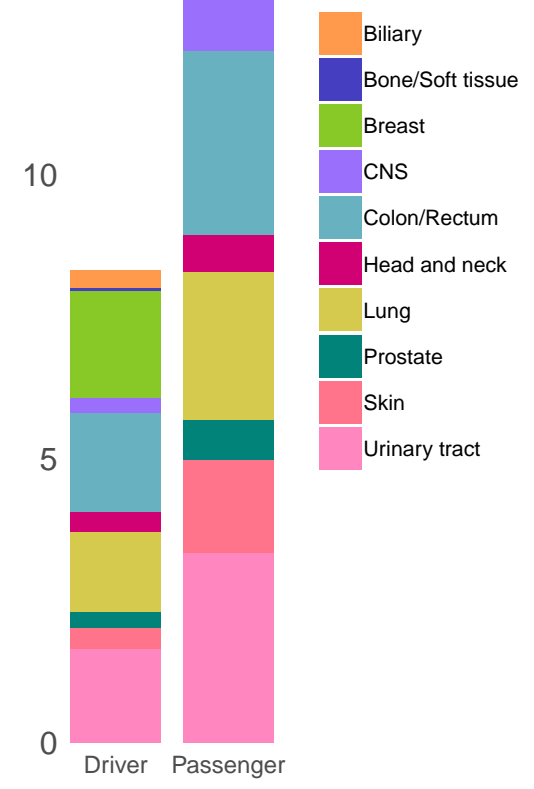



# ERG Variants

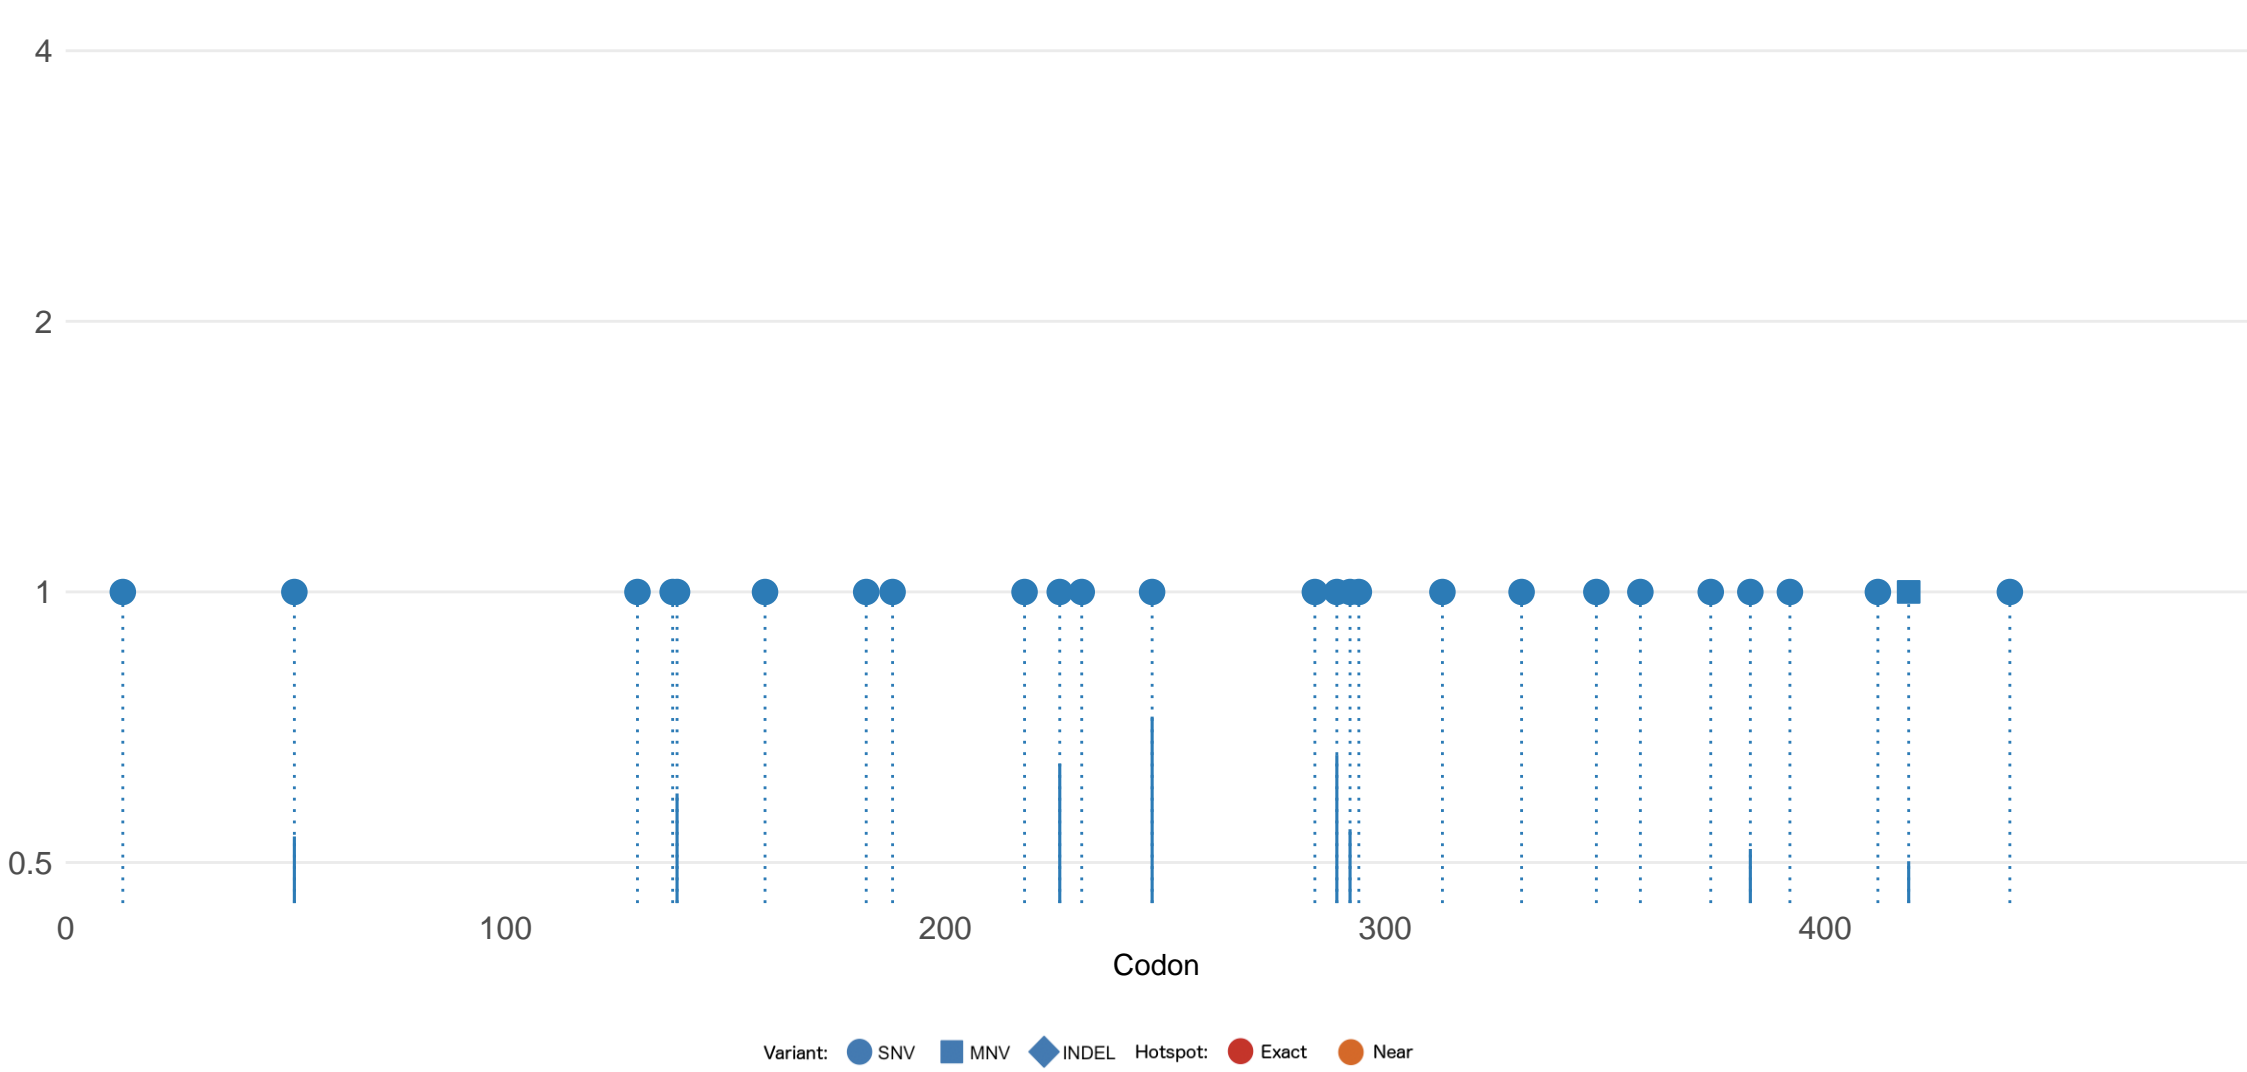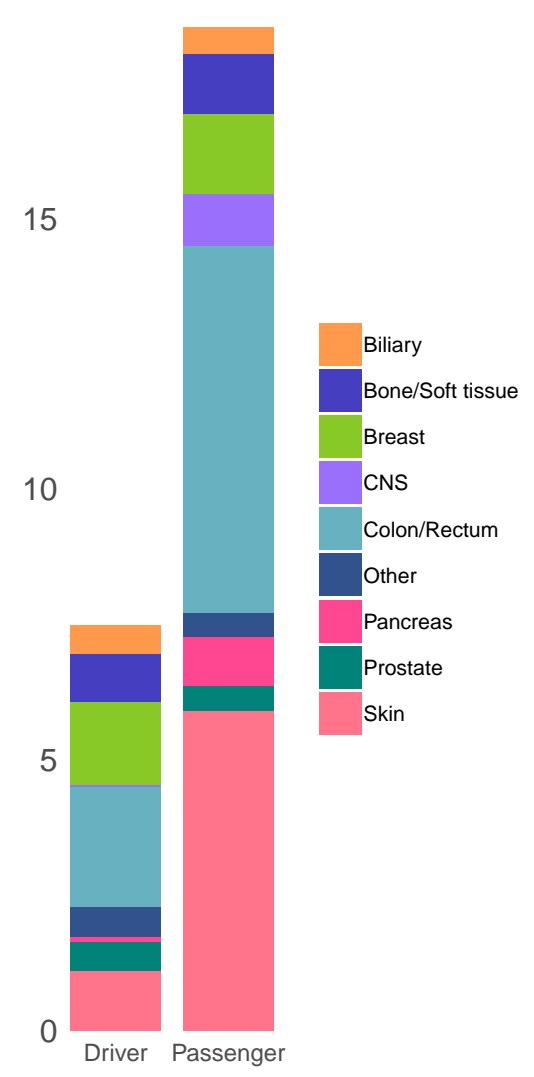

# ESR1 Variants

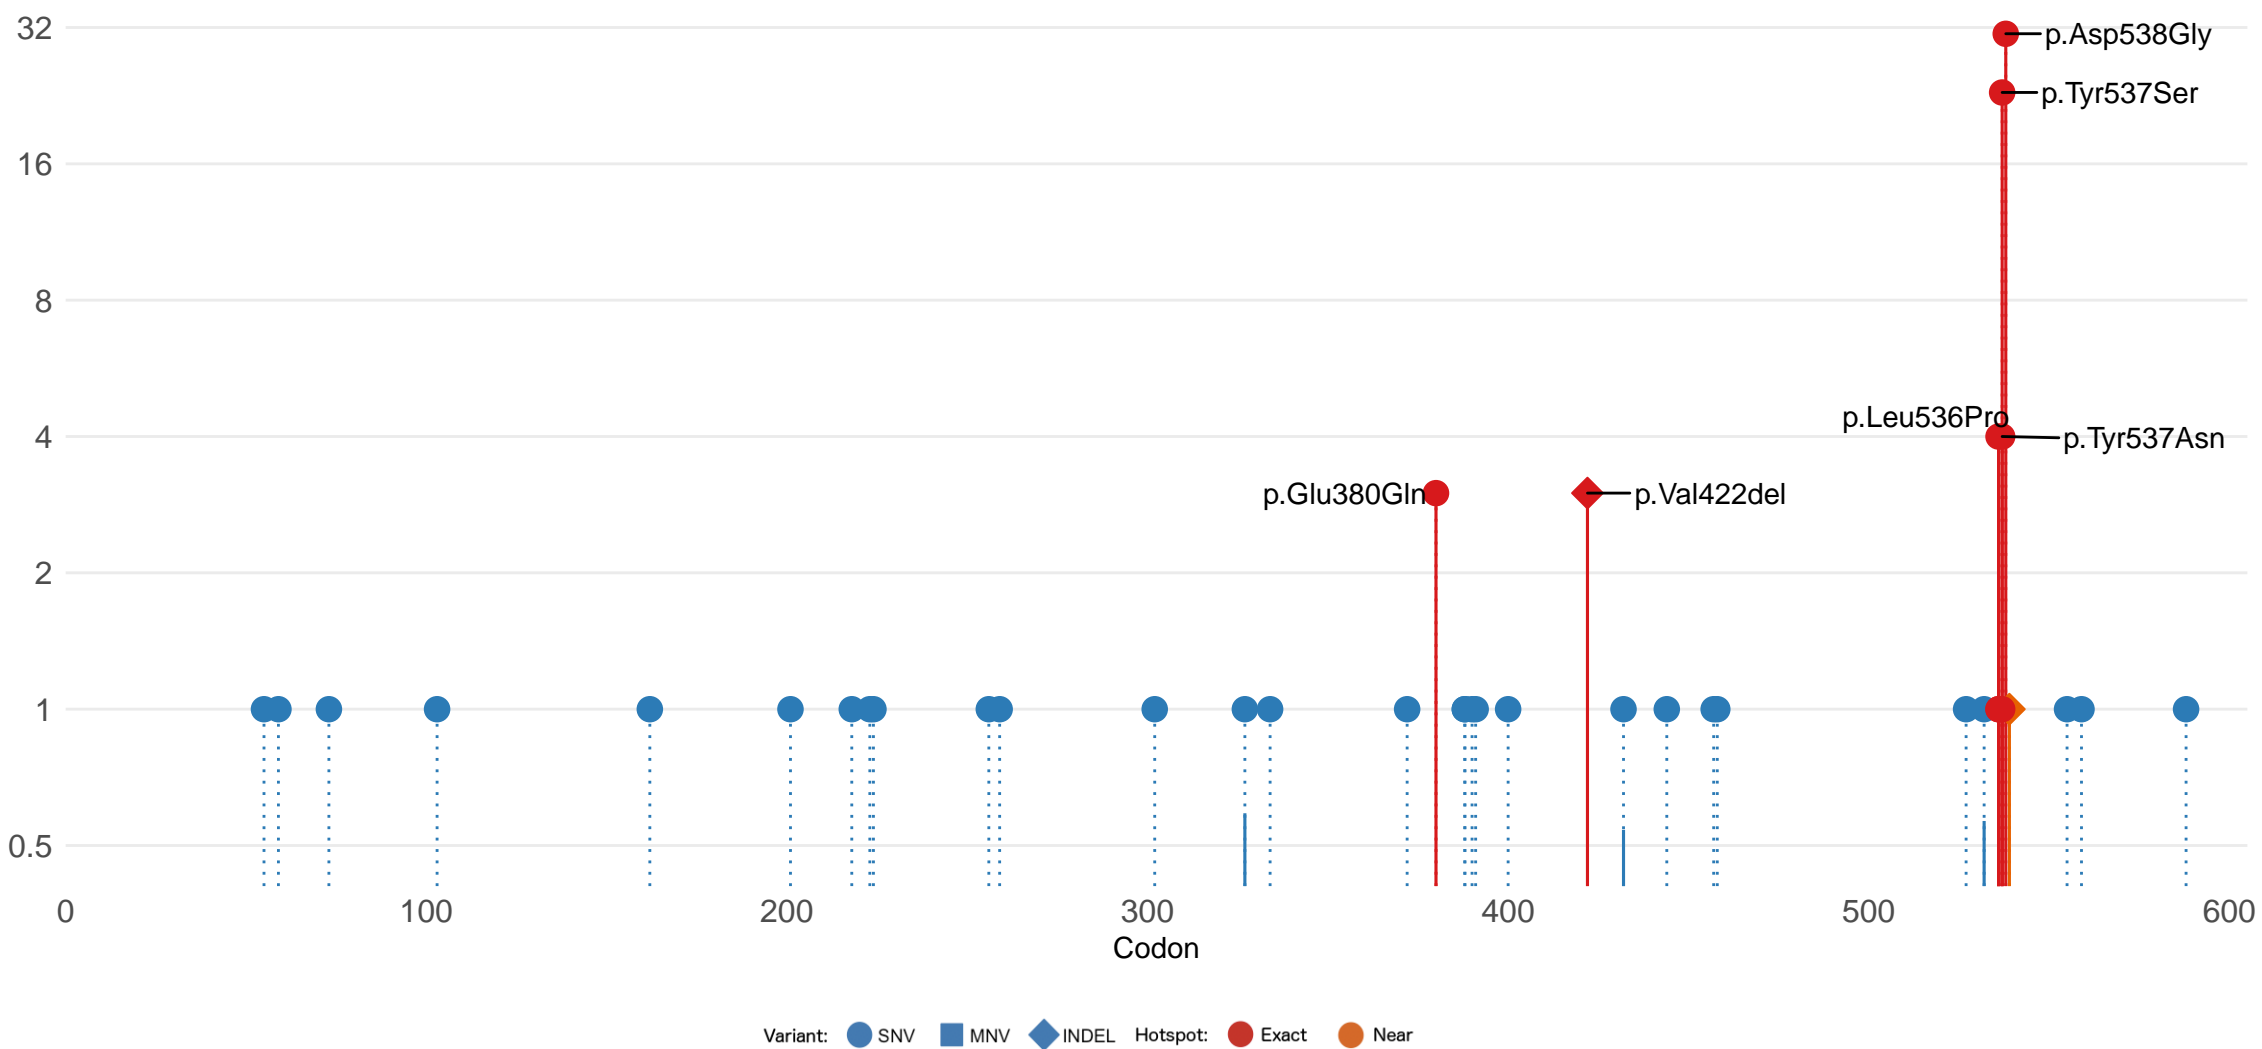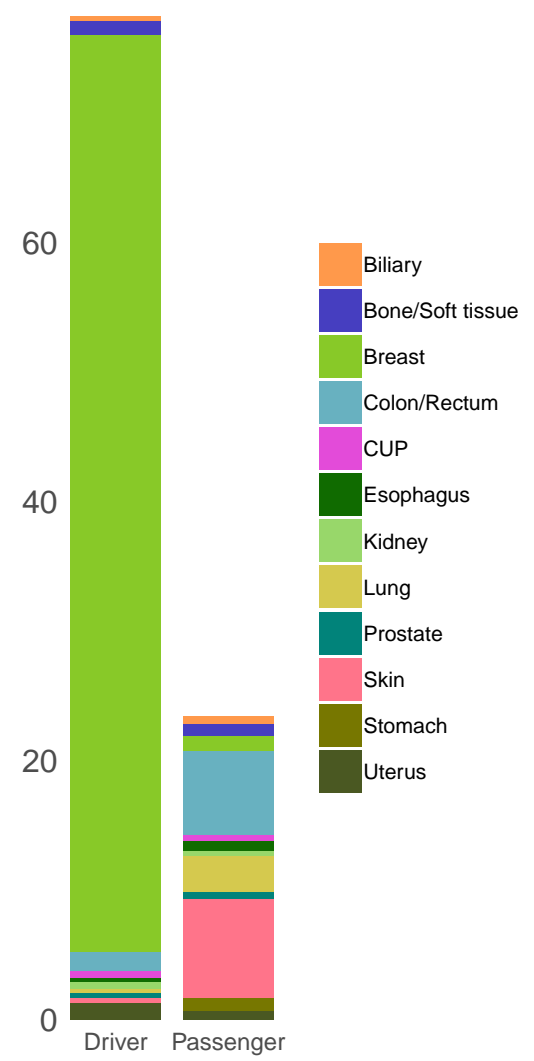

# FGFR1 Variants

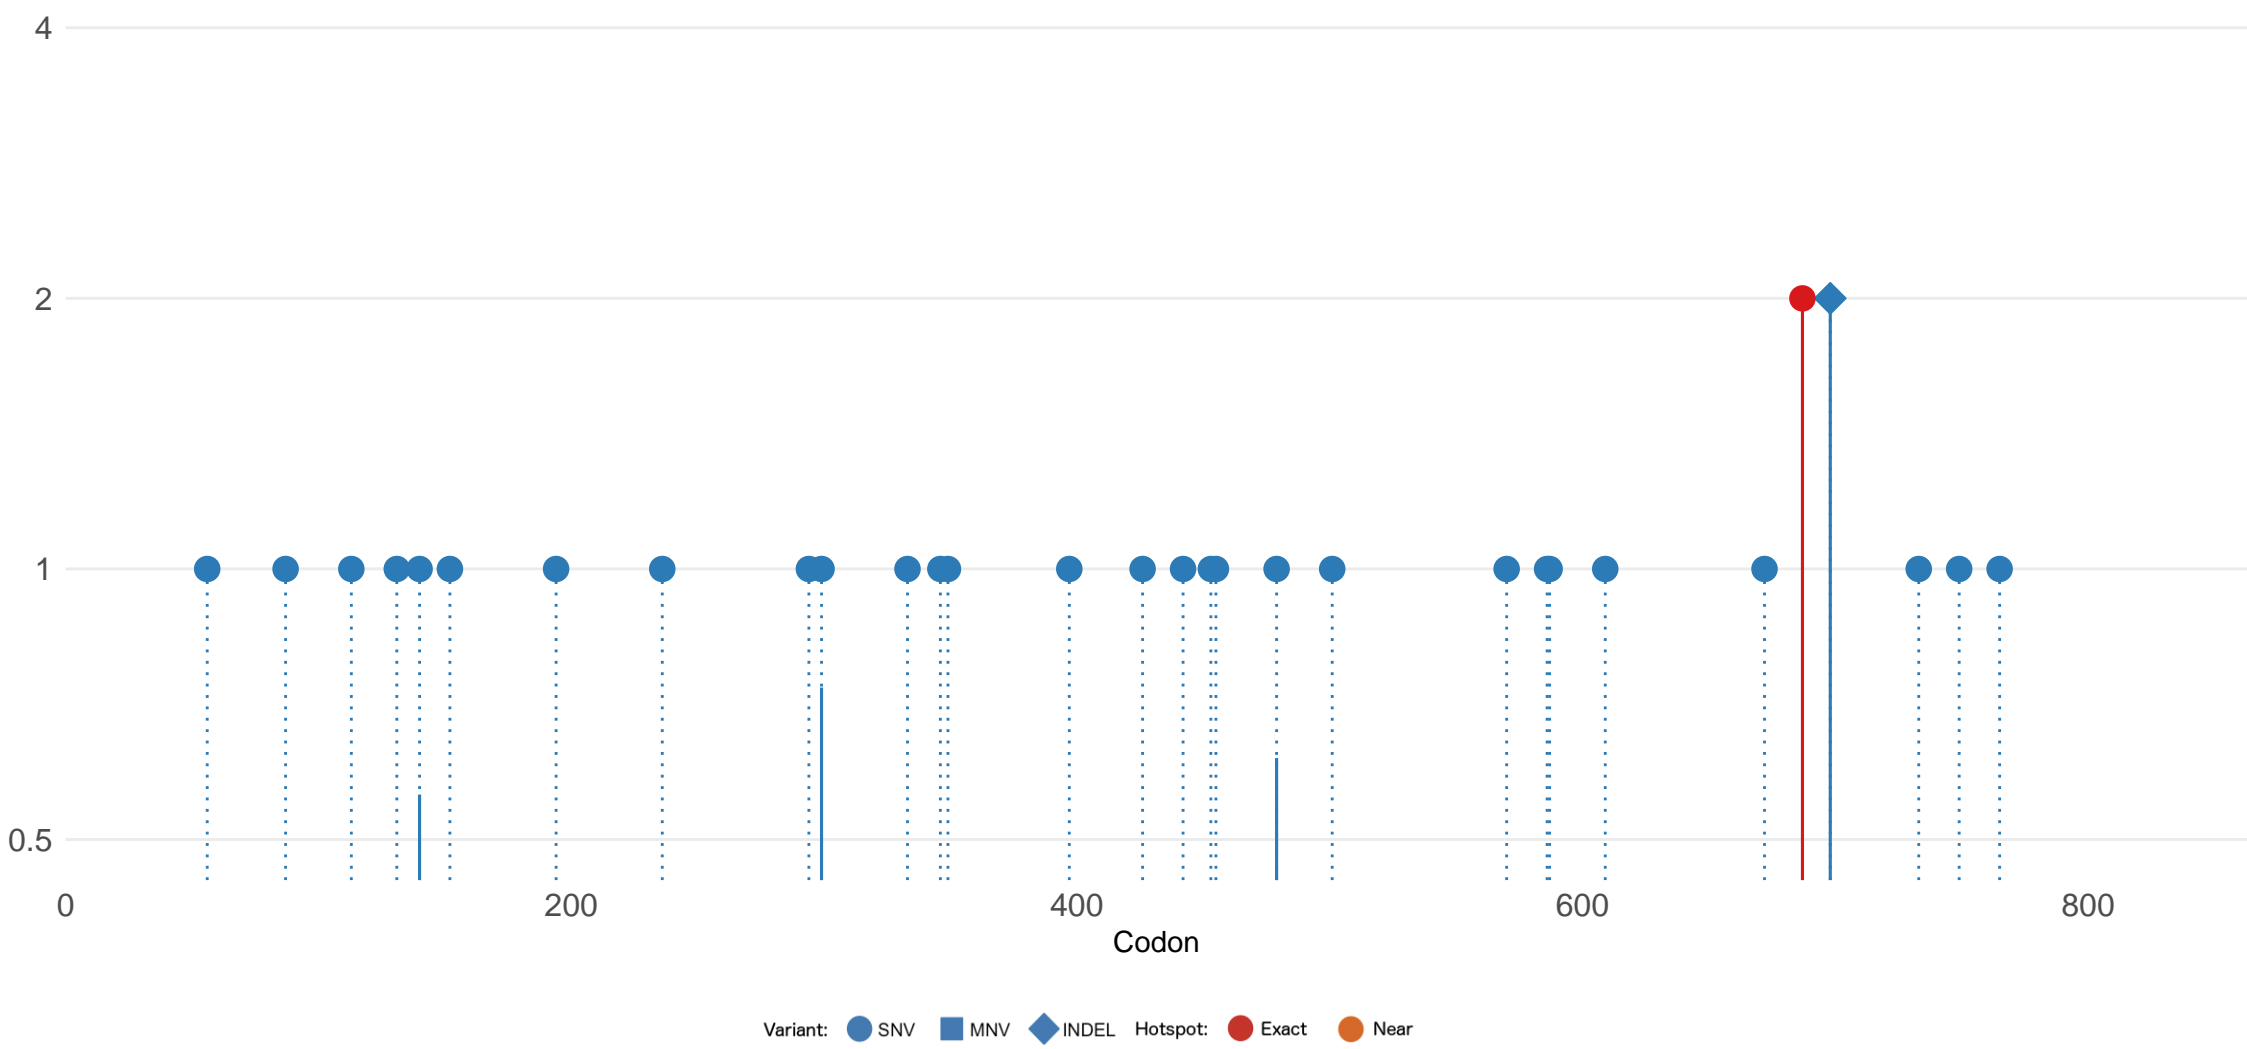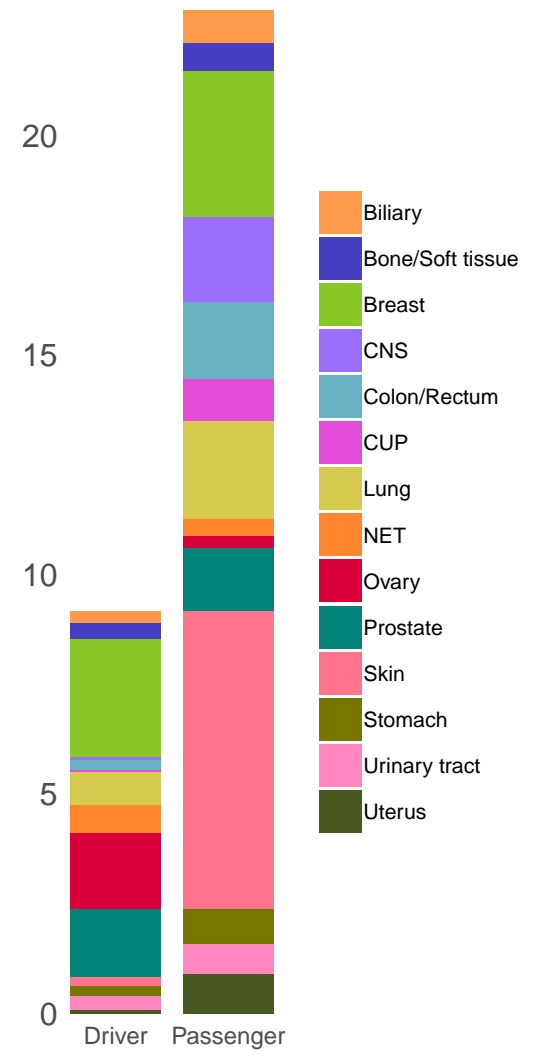

# FGFR2 Variants

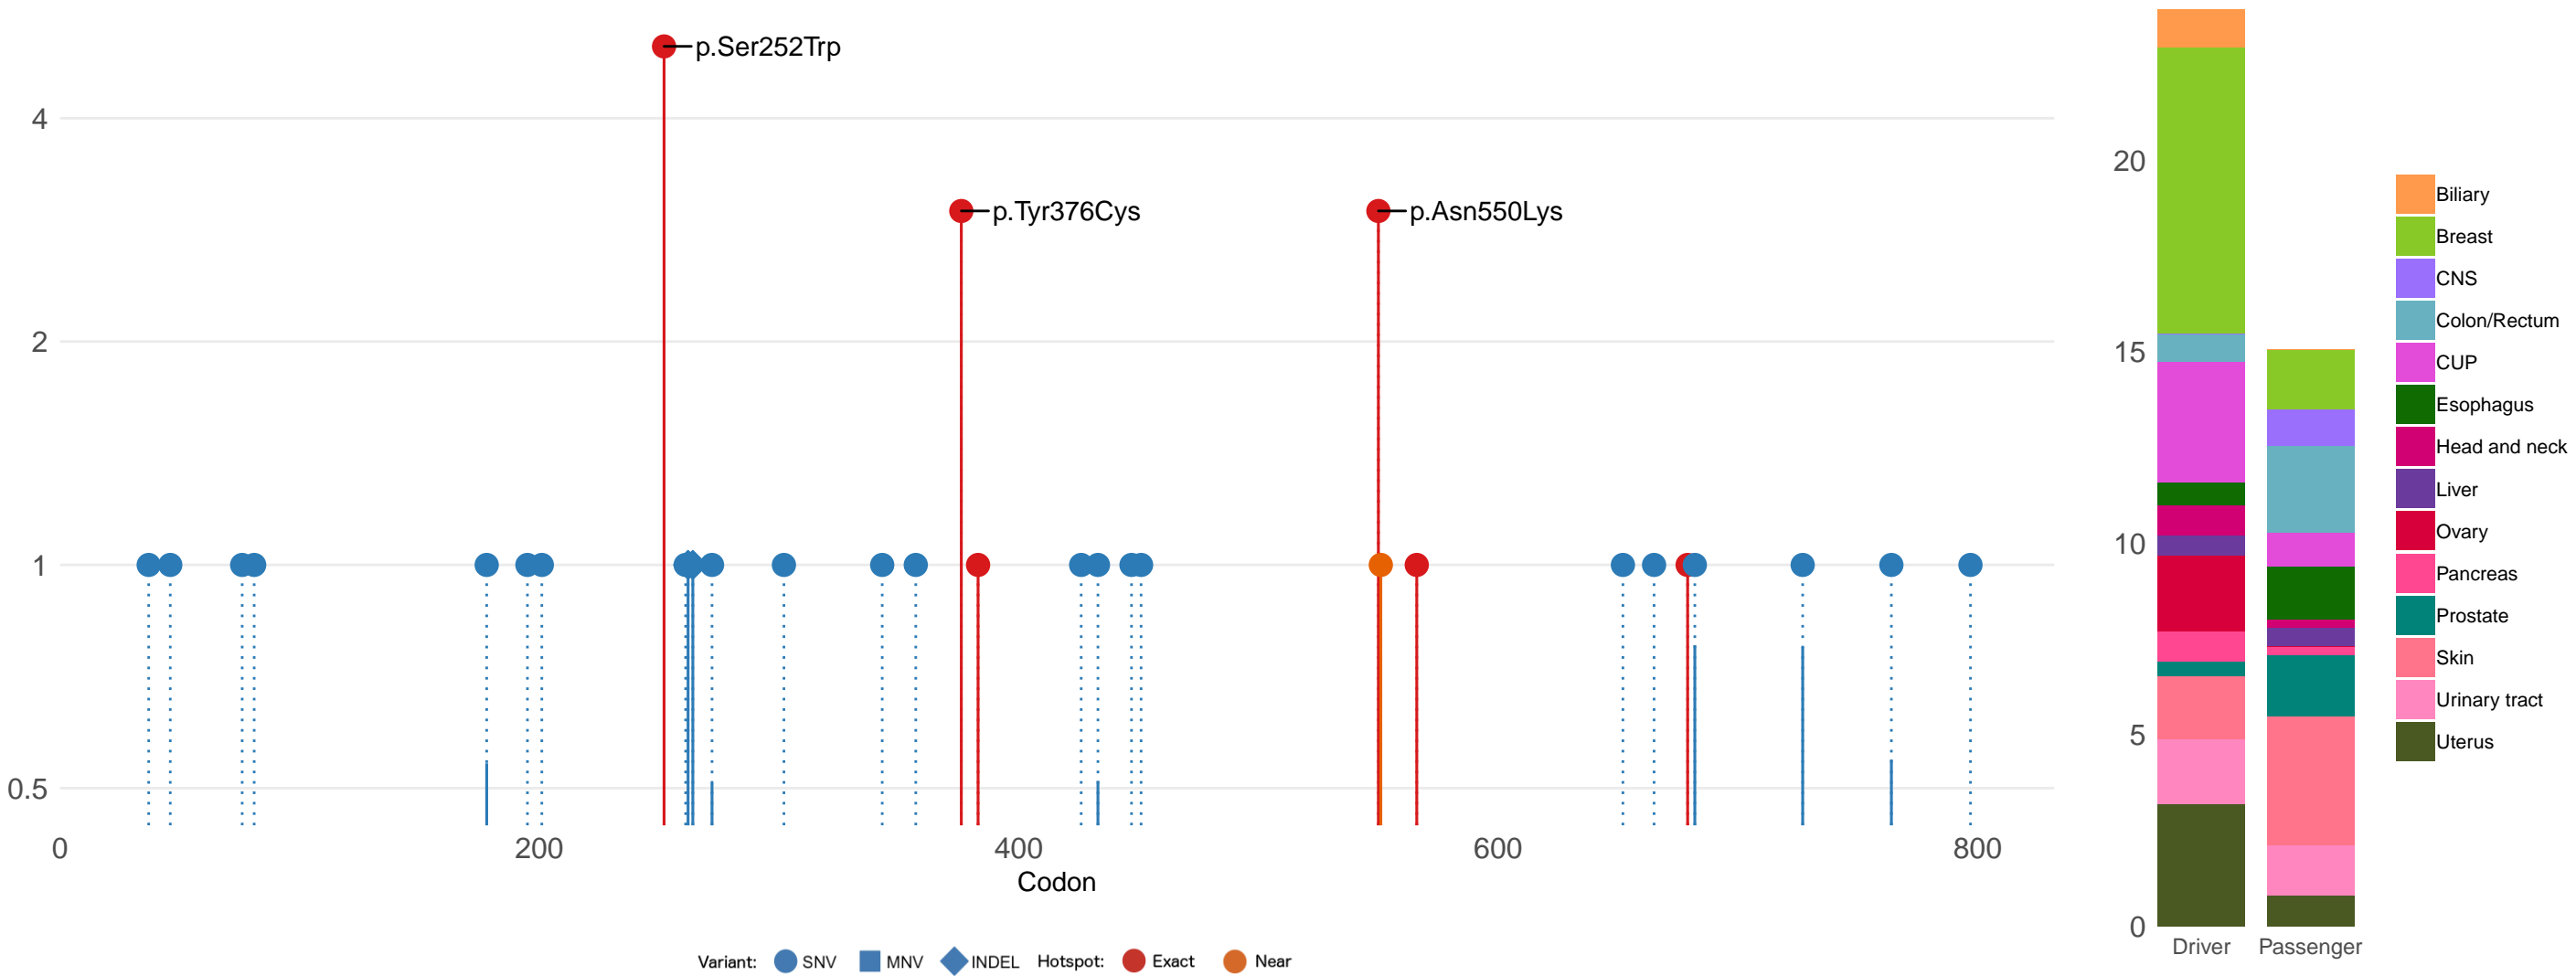

# FGFR3 Variants

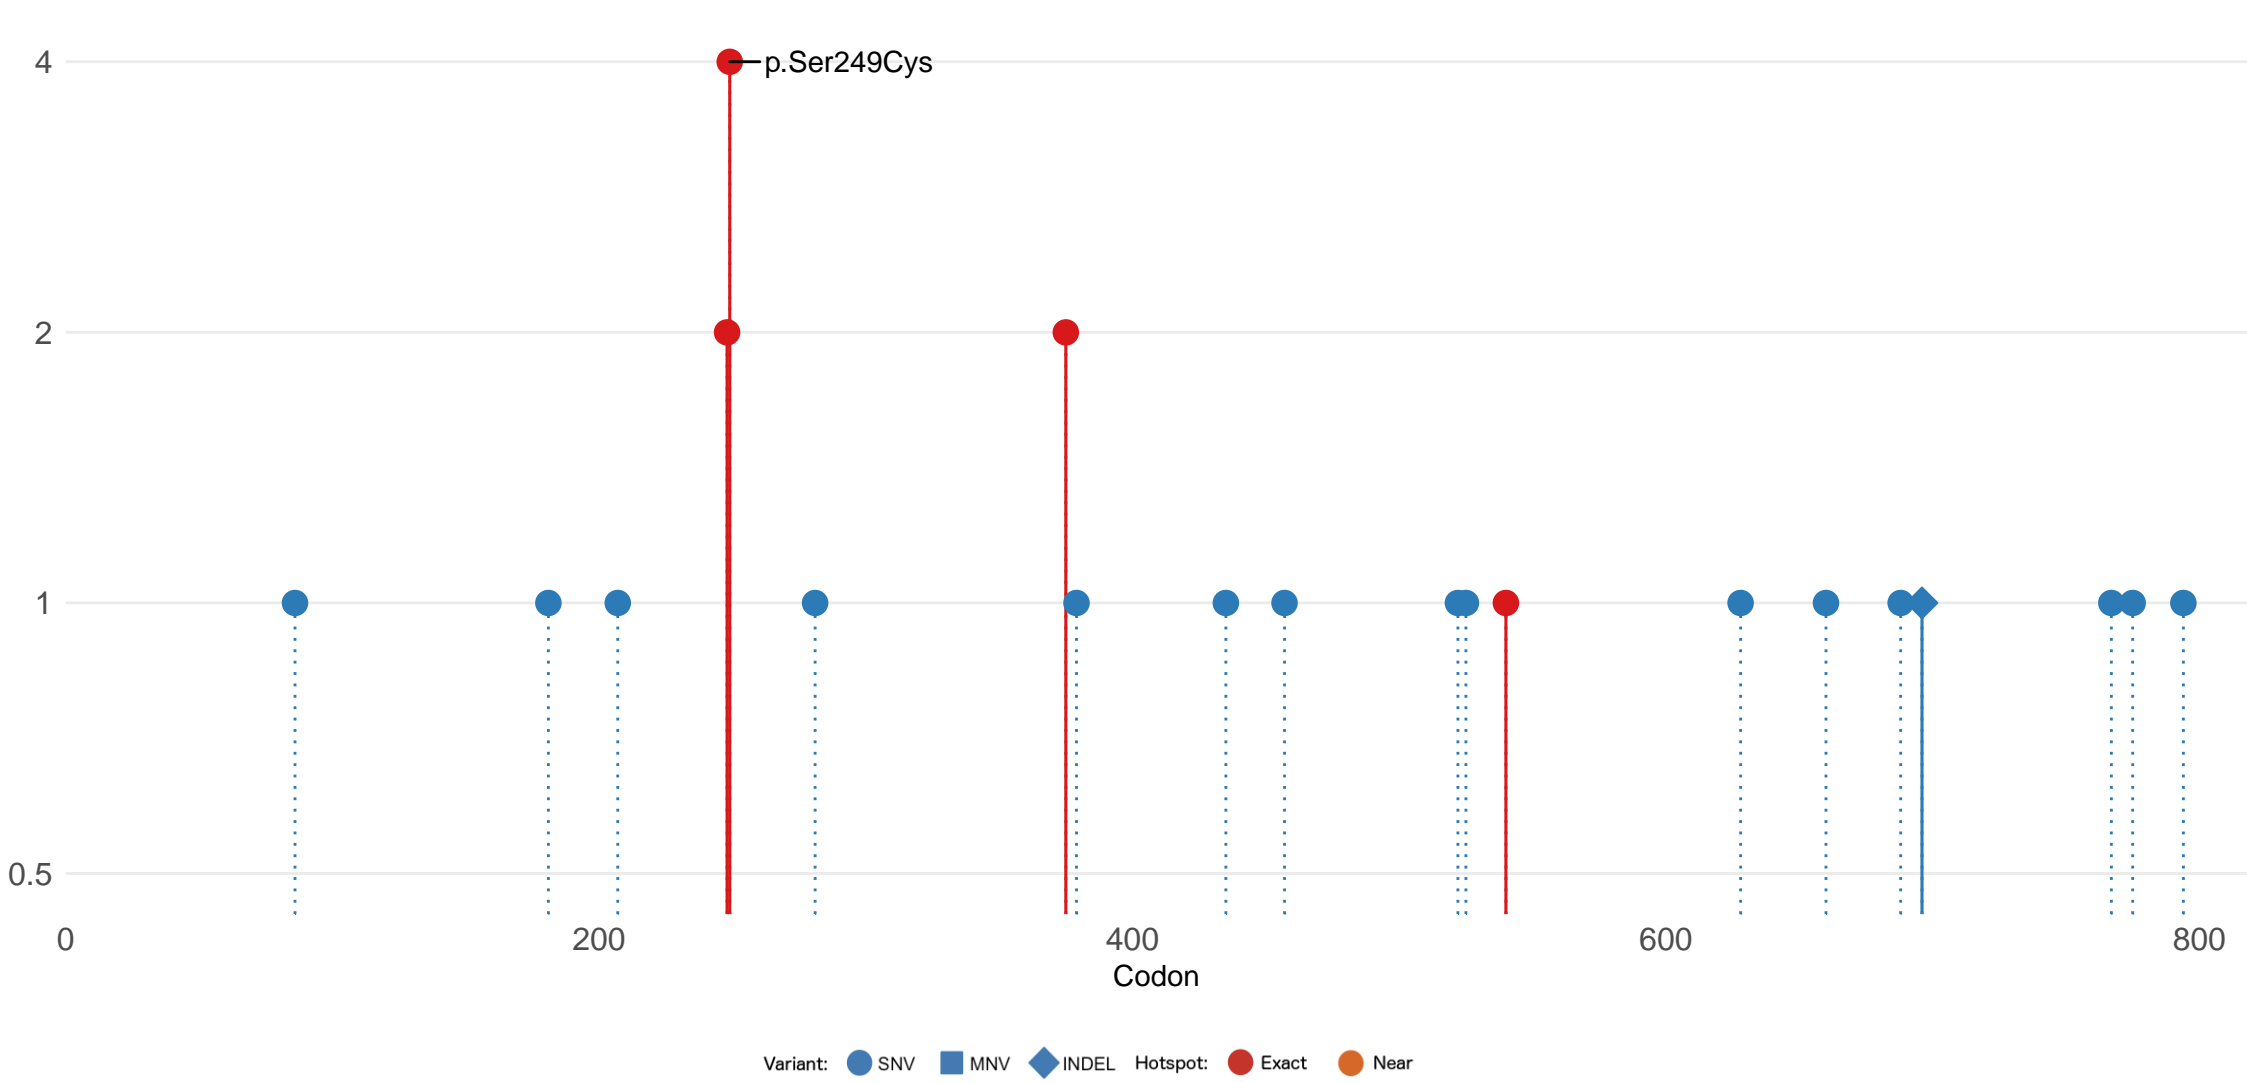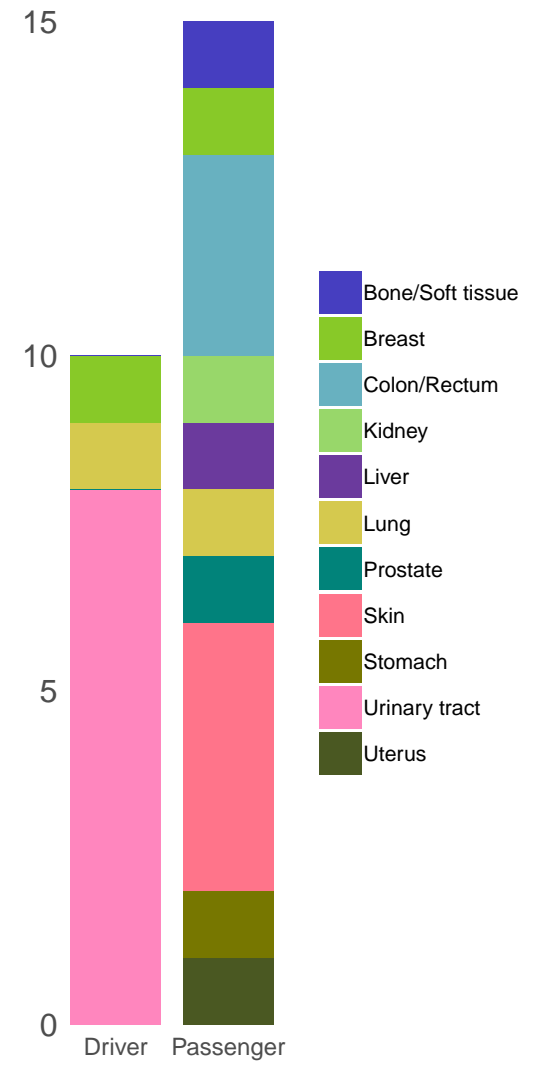

# FLT3 Variants

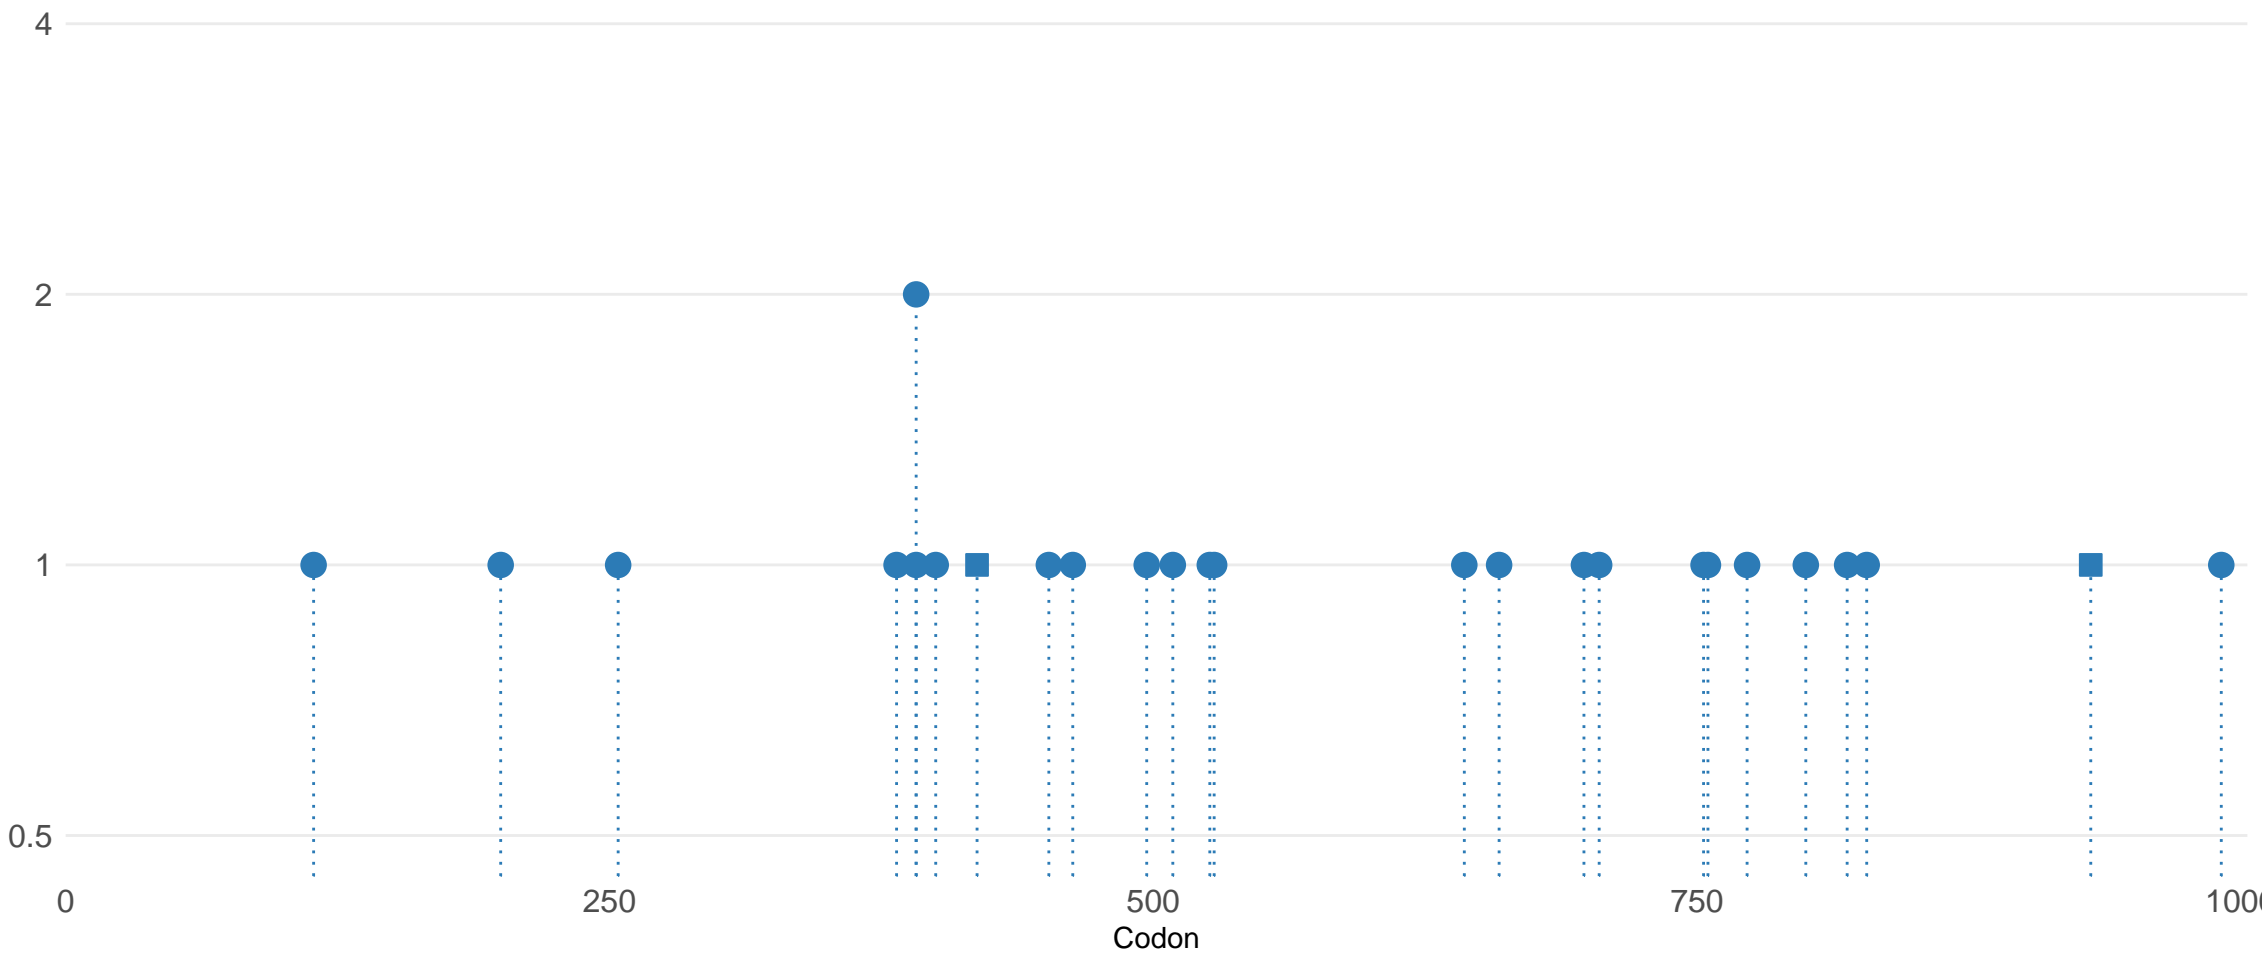

Variant: ● SNV ■ MNV ◆ INDEL Hotspot: ● Exact ● Near

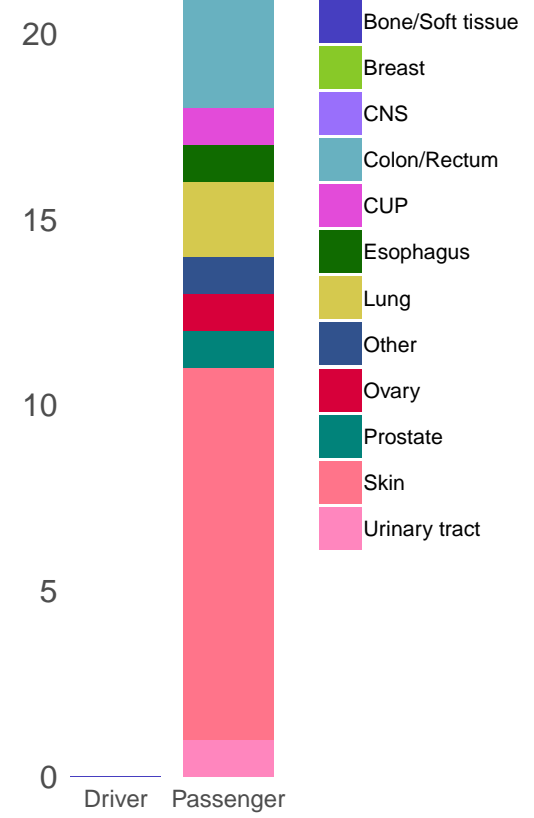

Driver Passenger

# FOSL2 Variants

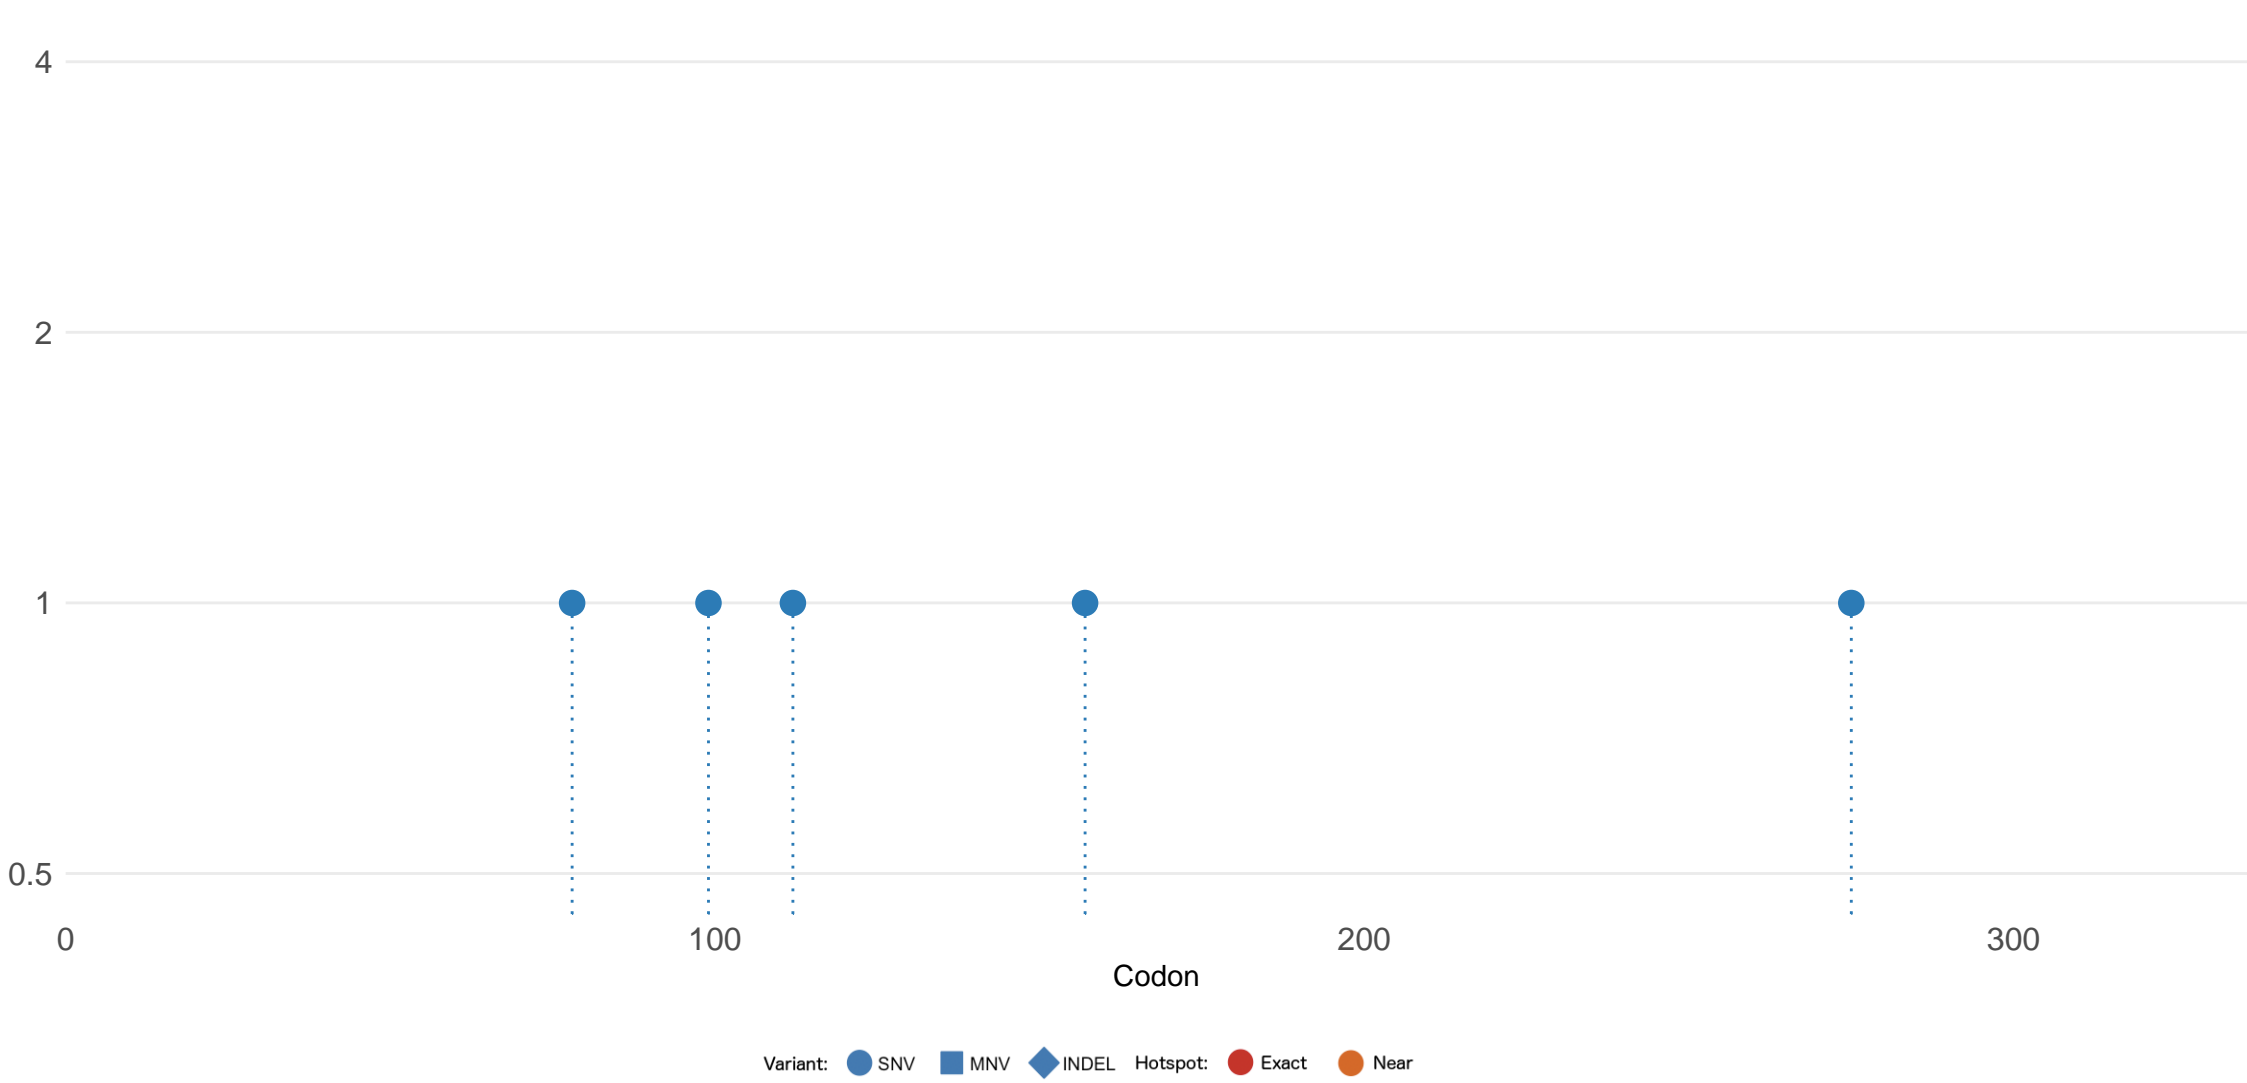

Variant: ● SNV ■ MNV ◆ INDEL Hotspot: ● Exact ● Near

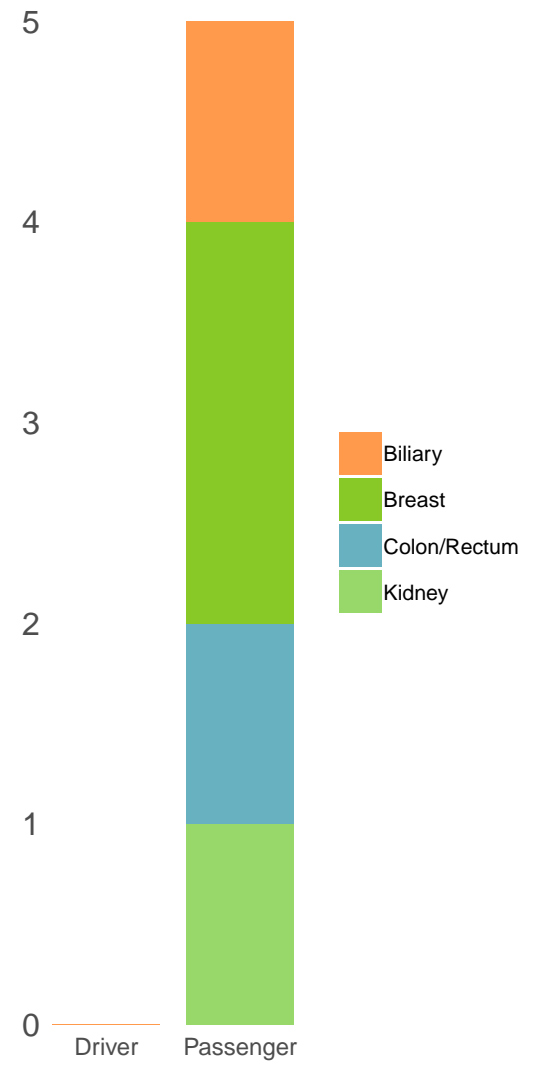

■ Biliary  
■ Breast  
■ Colon/Rectum  
■ Kidney

# FOXA1 Variants

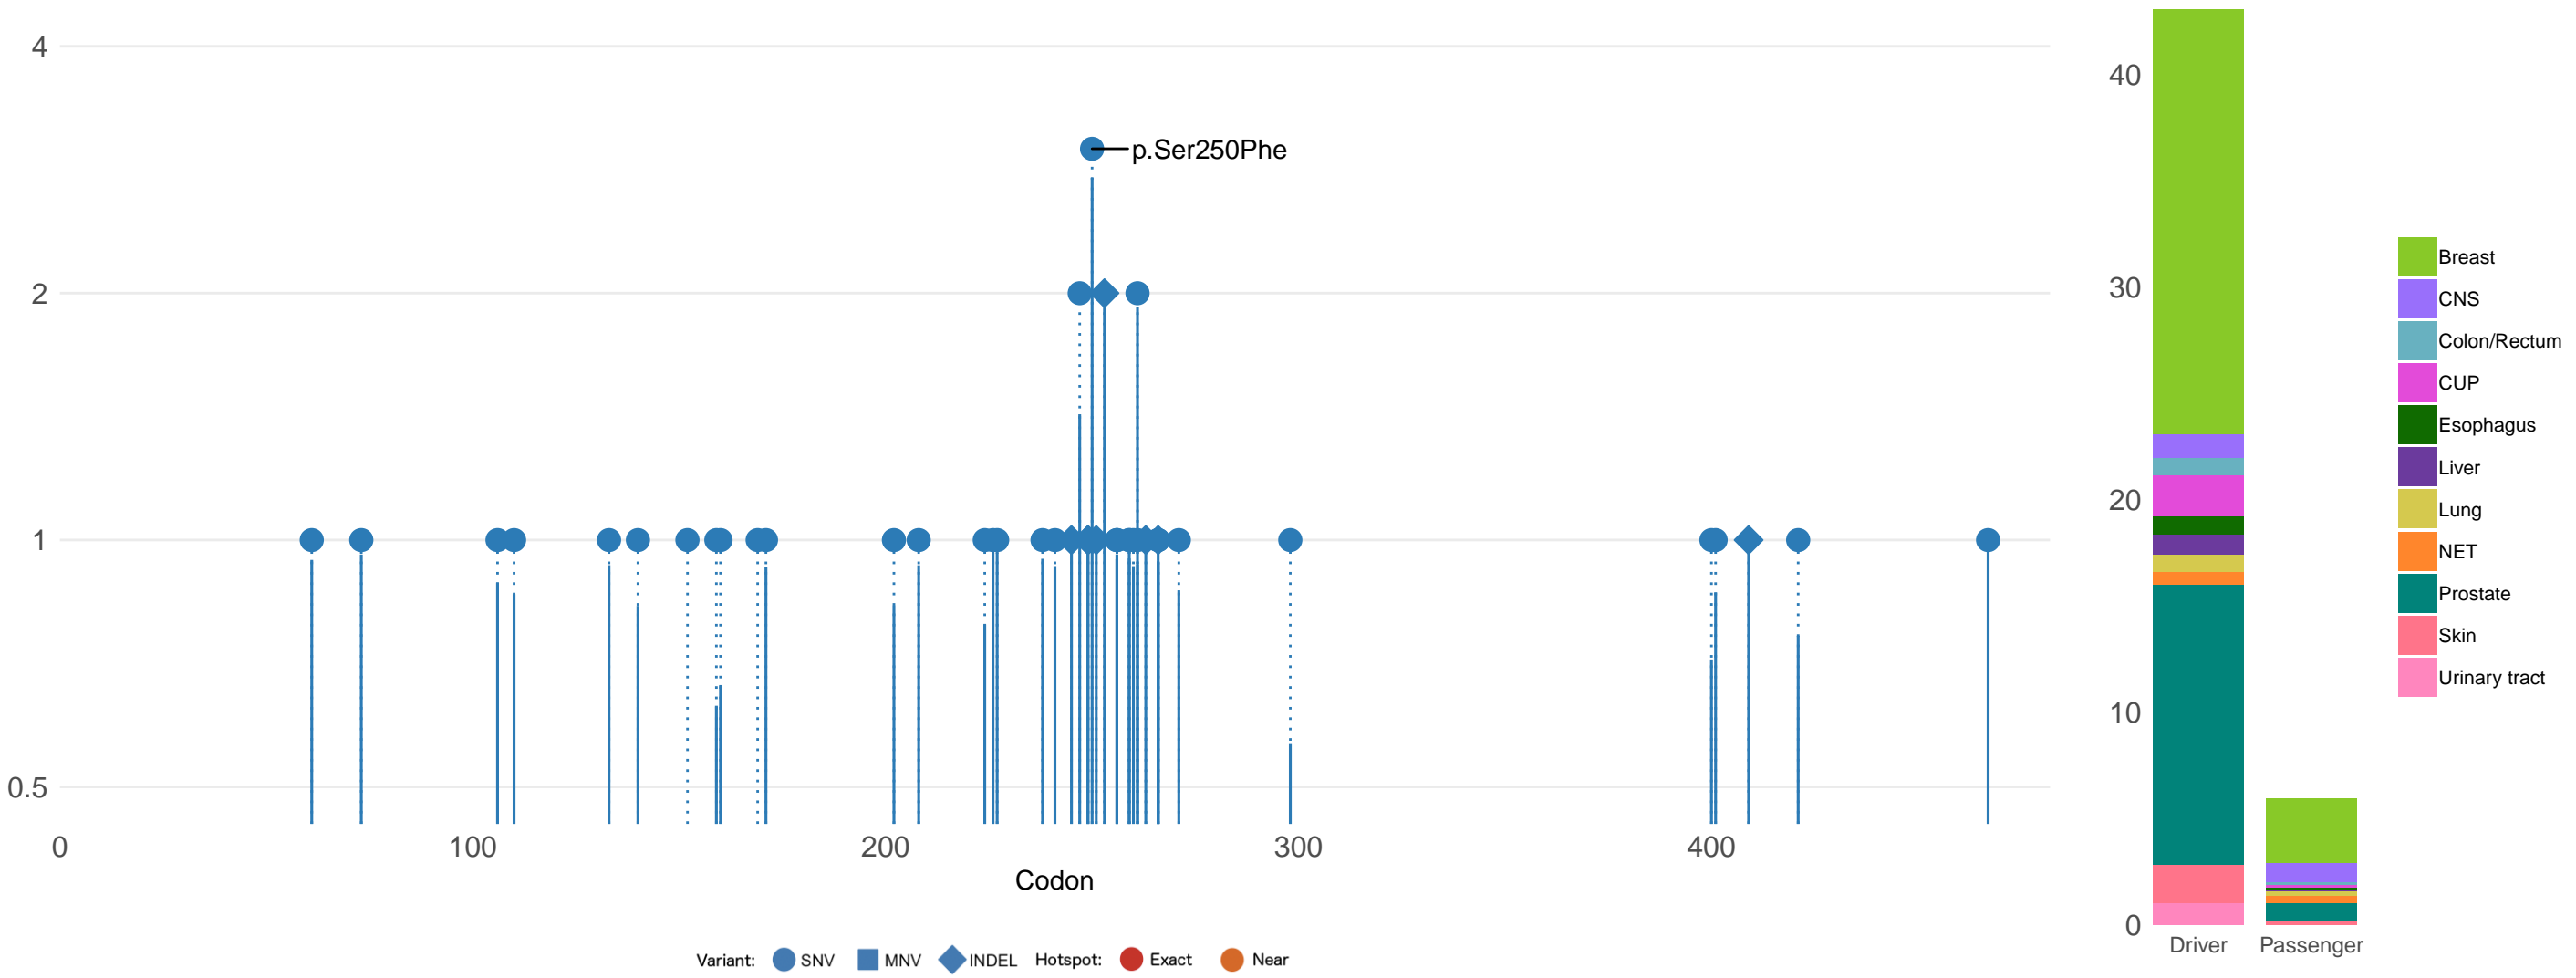



# FOXA2 Variants

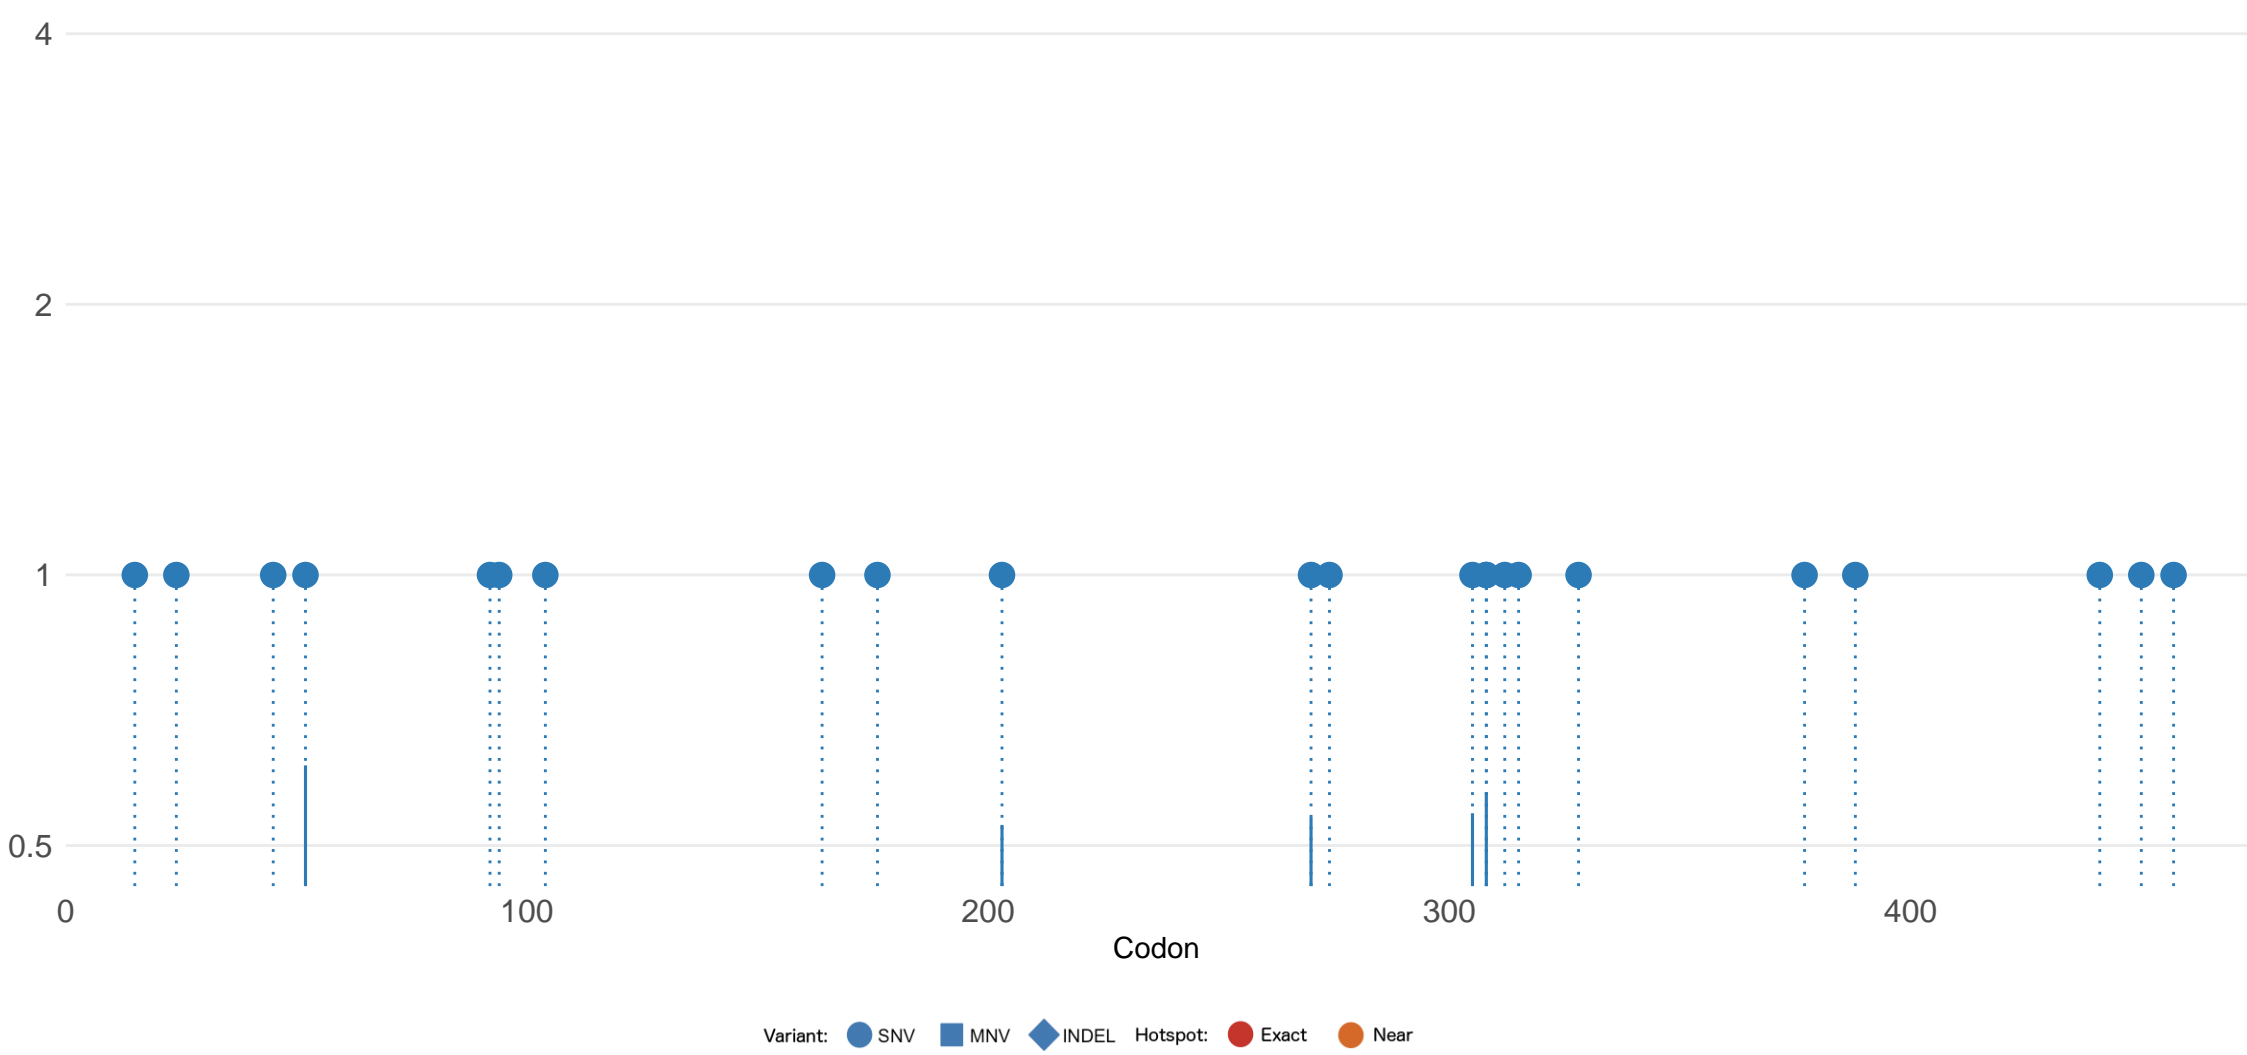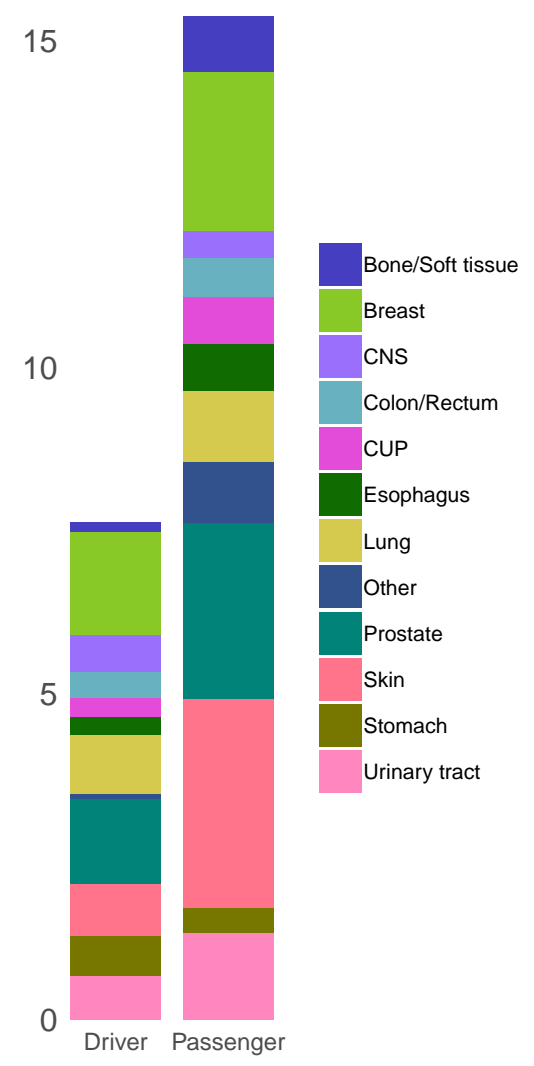

# FOXL2 Variants

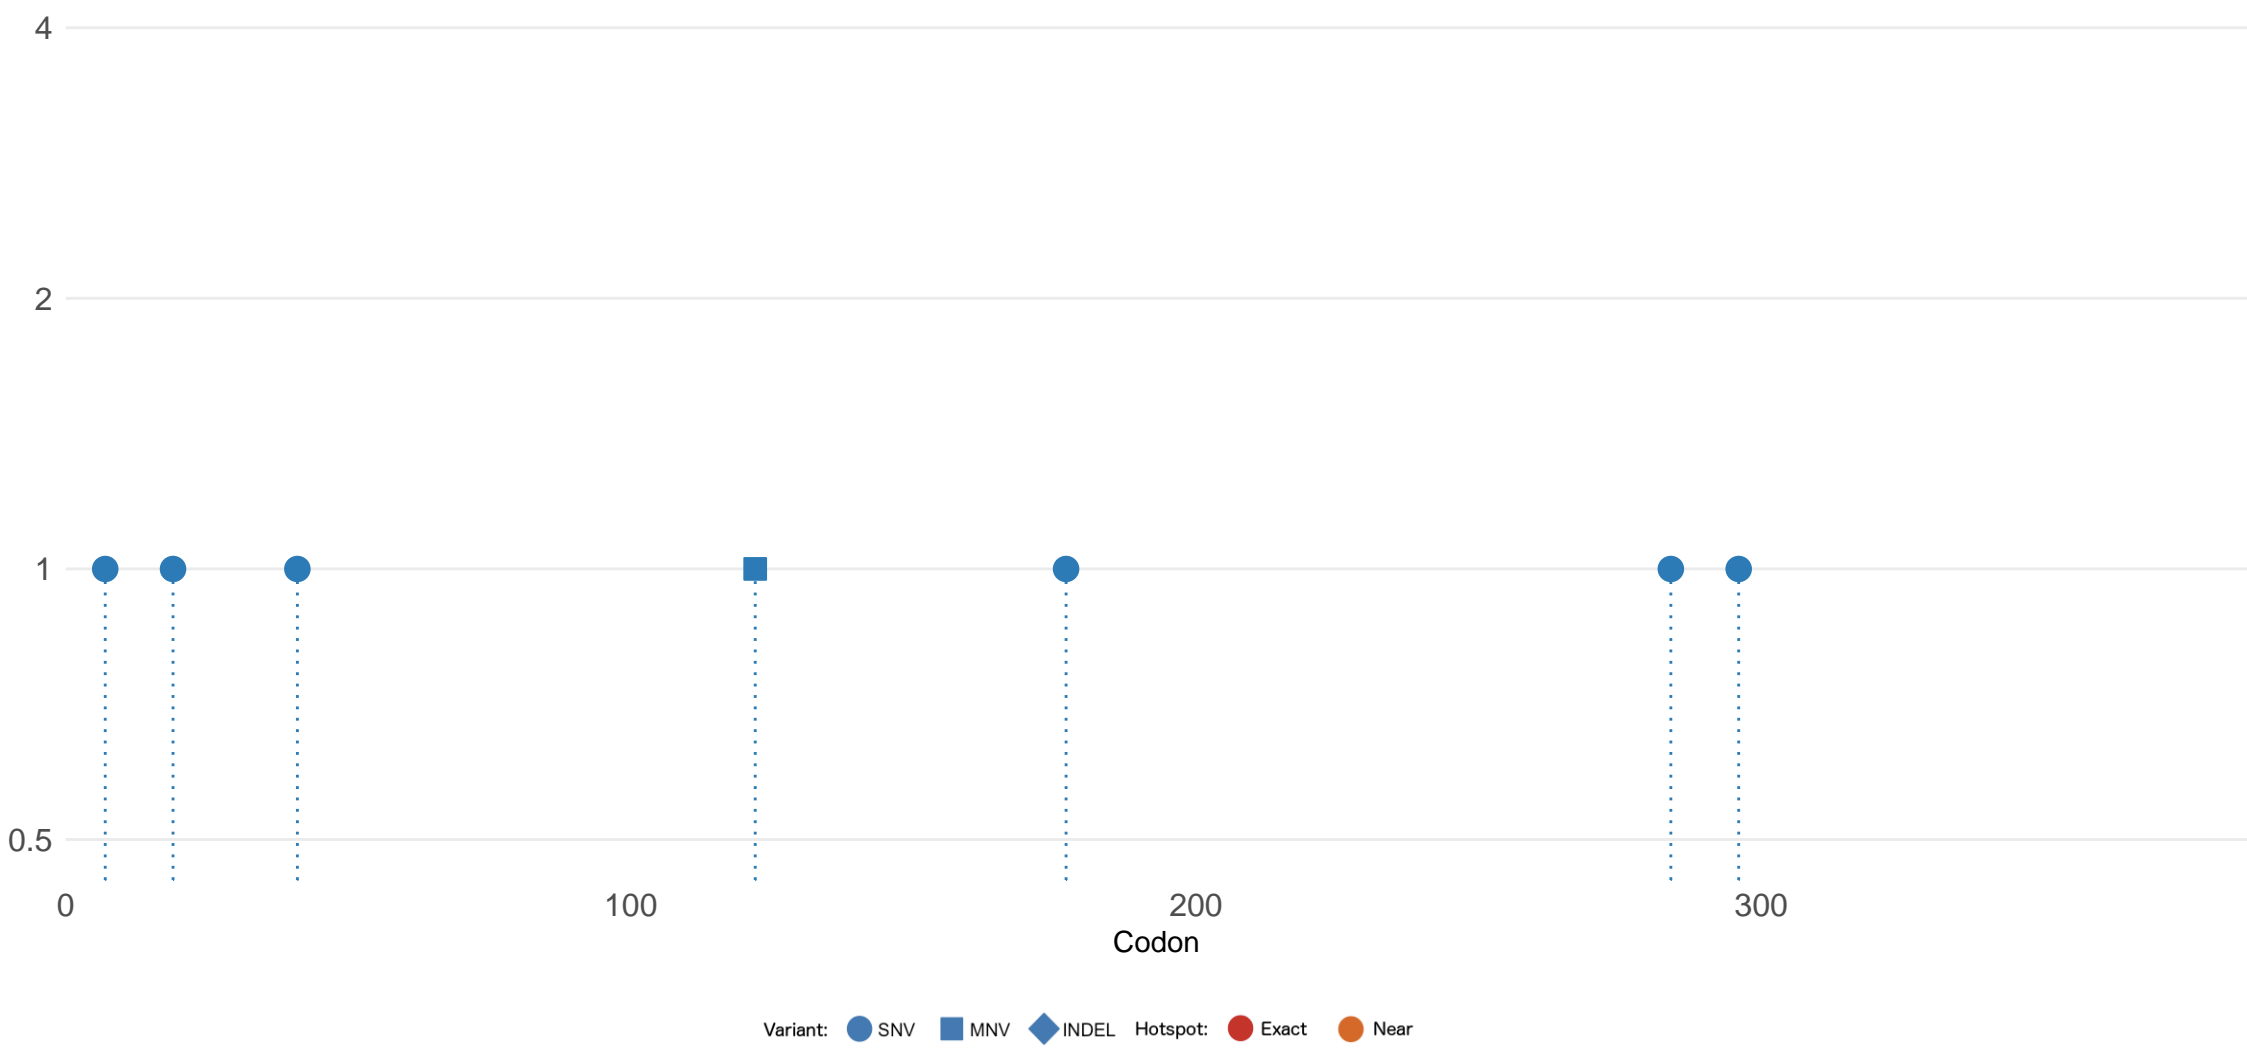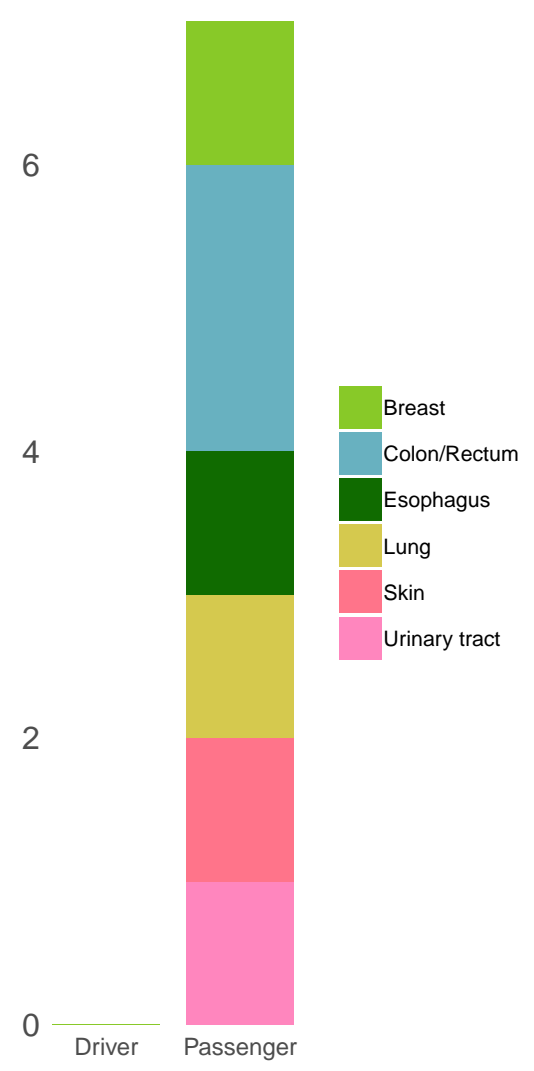

# FOXQ1 Variants

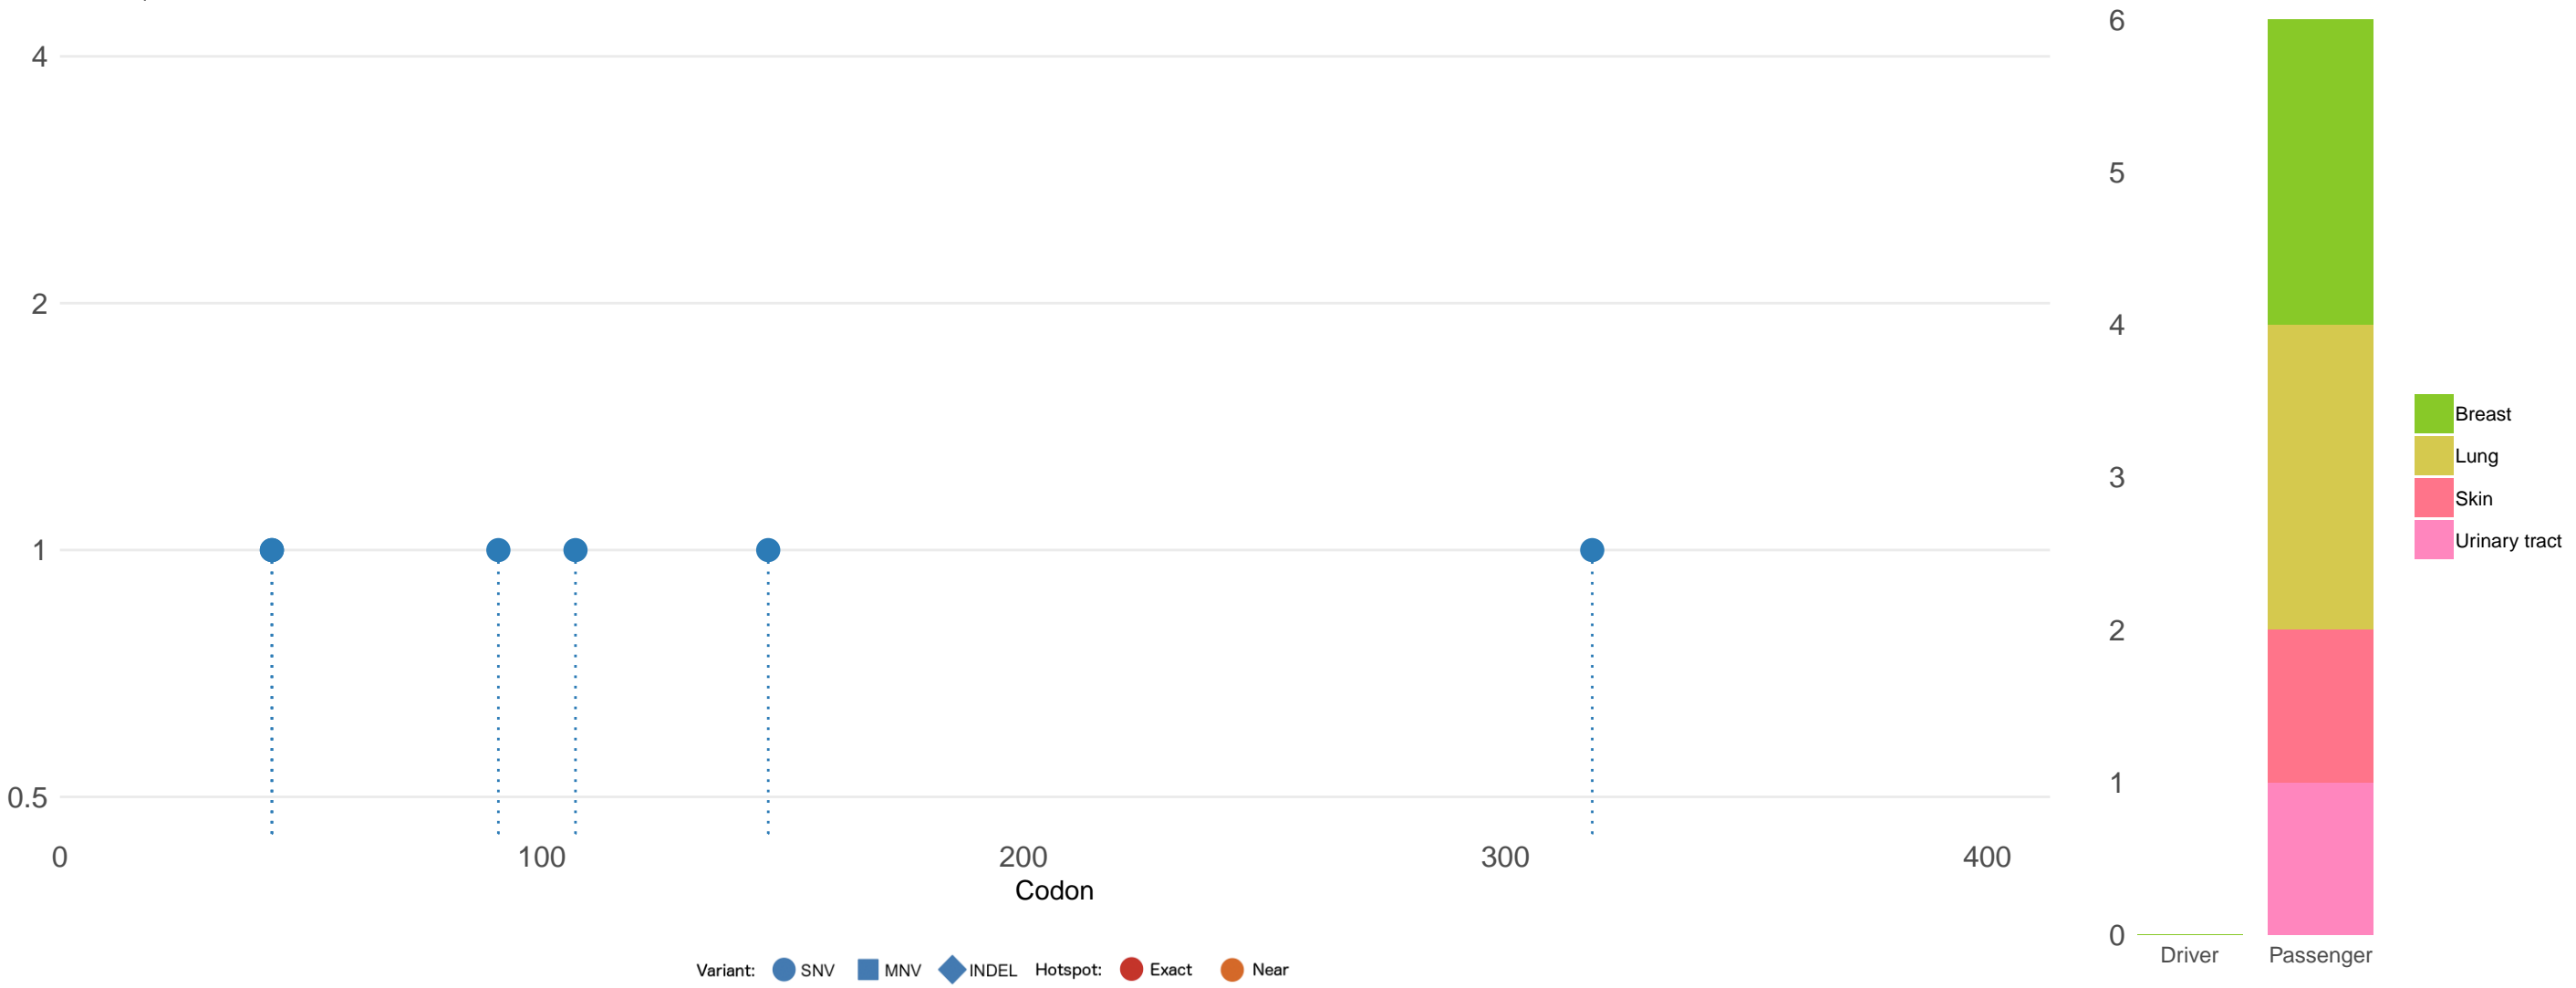

# GATA2 Variants

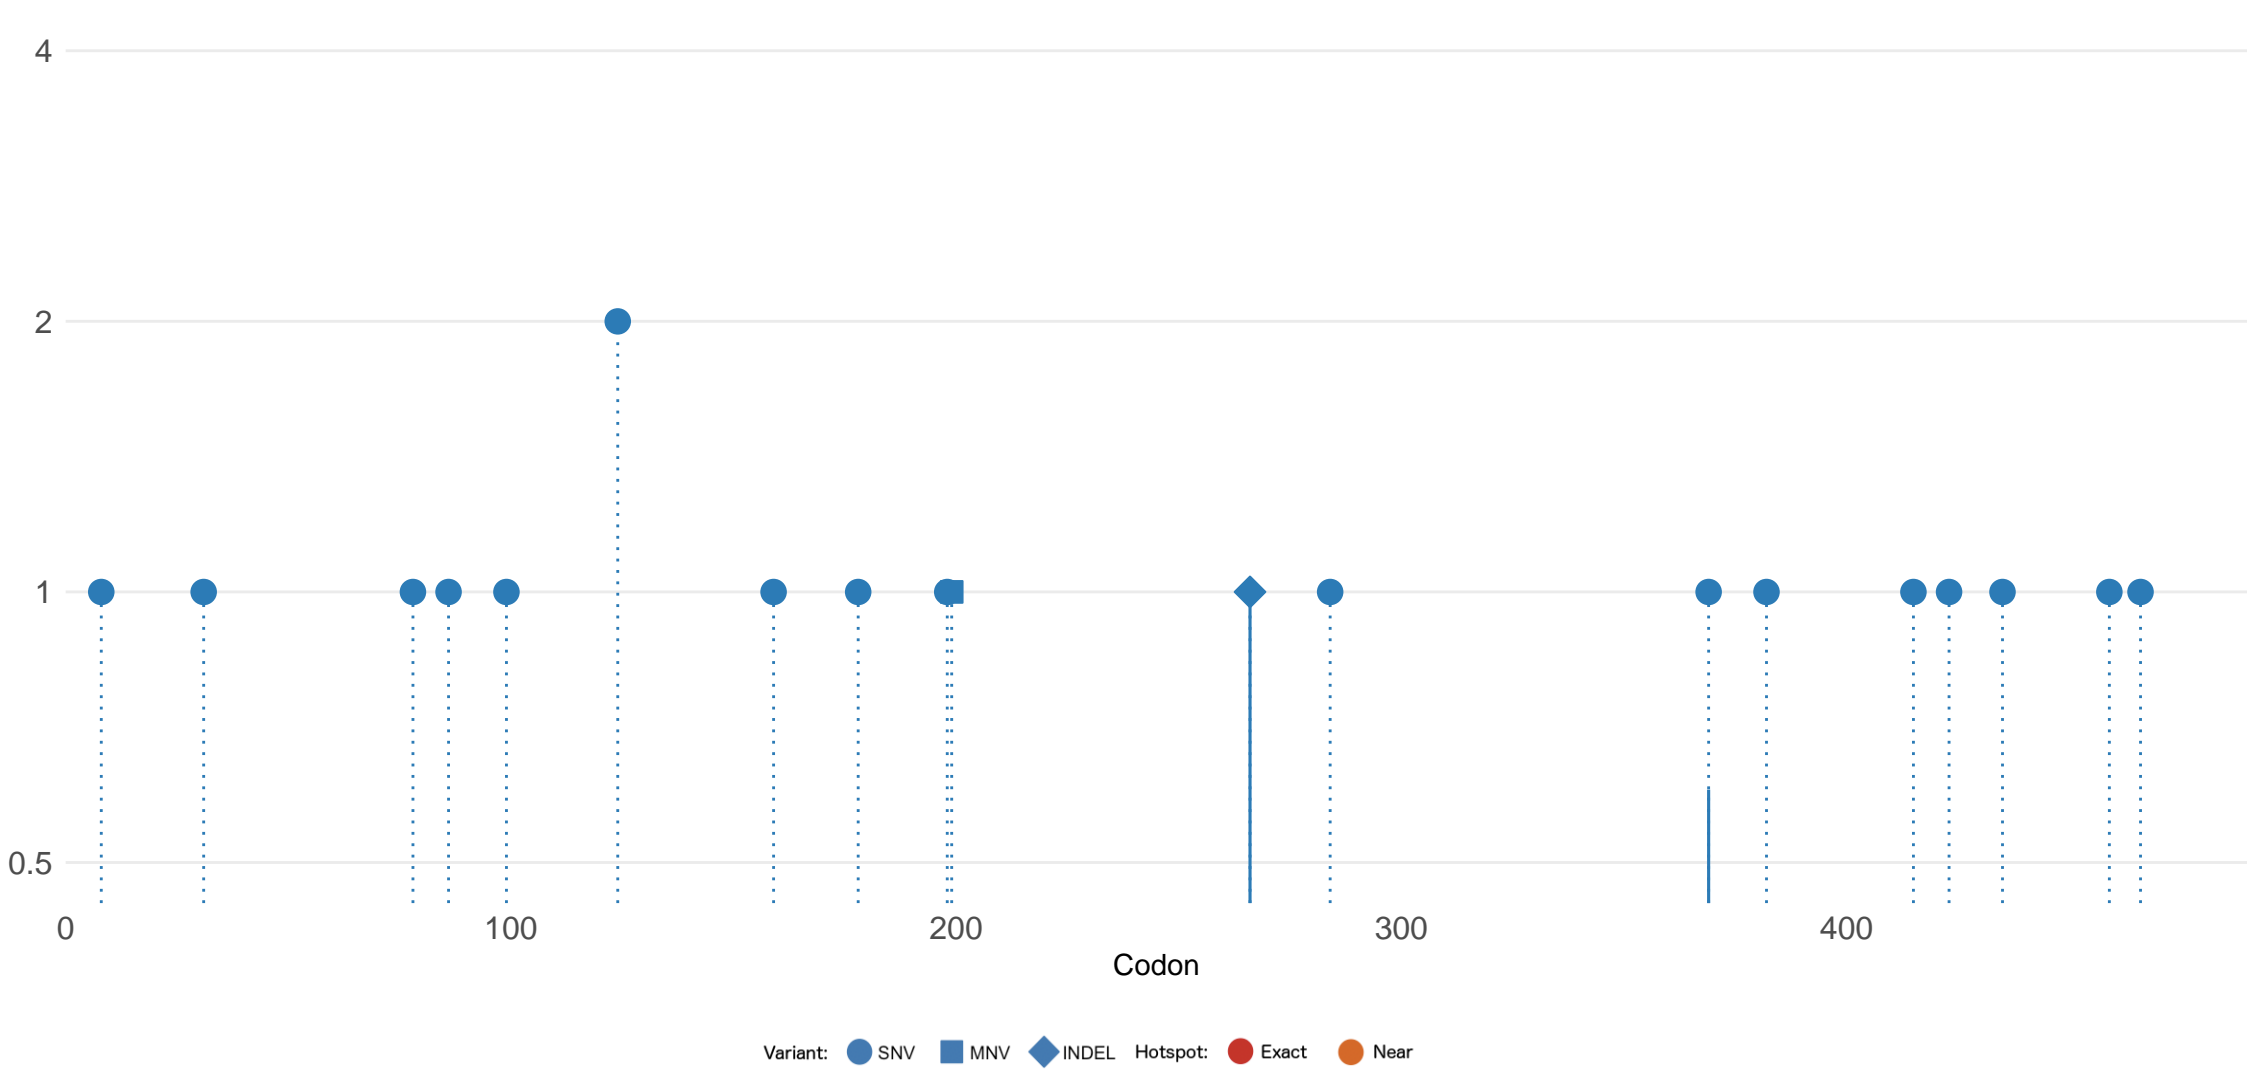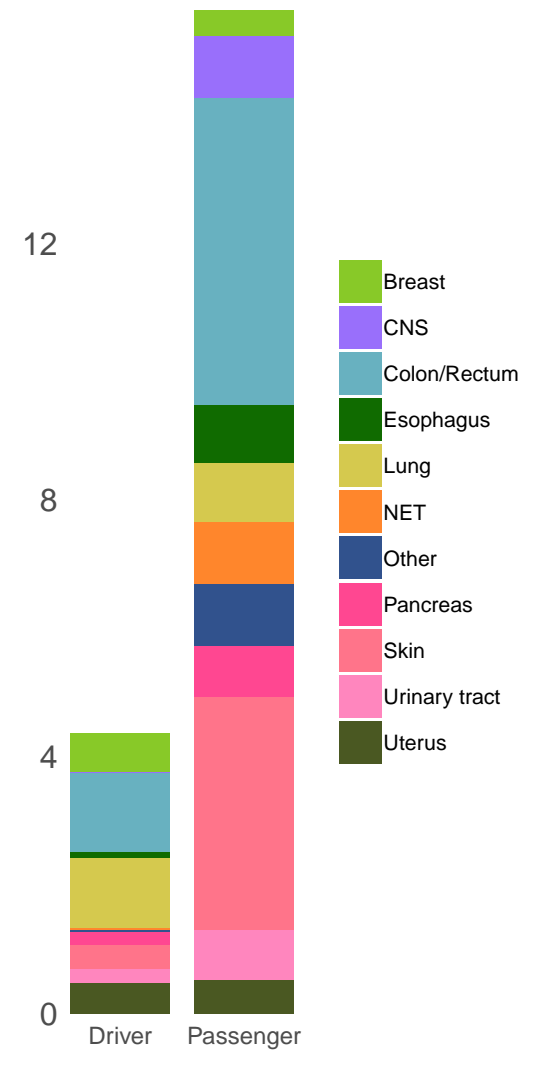

# GNA11 Variants

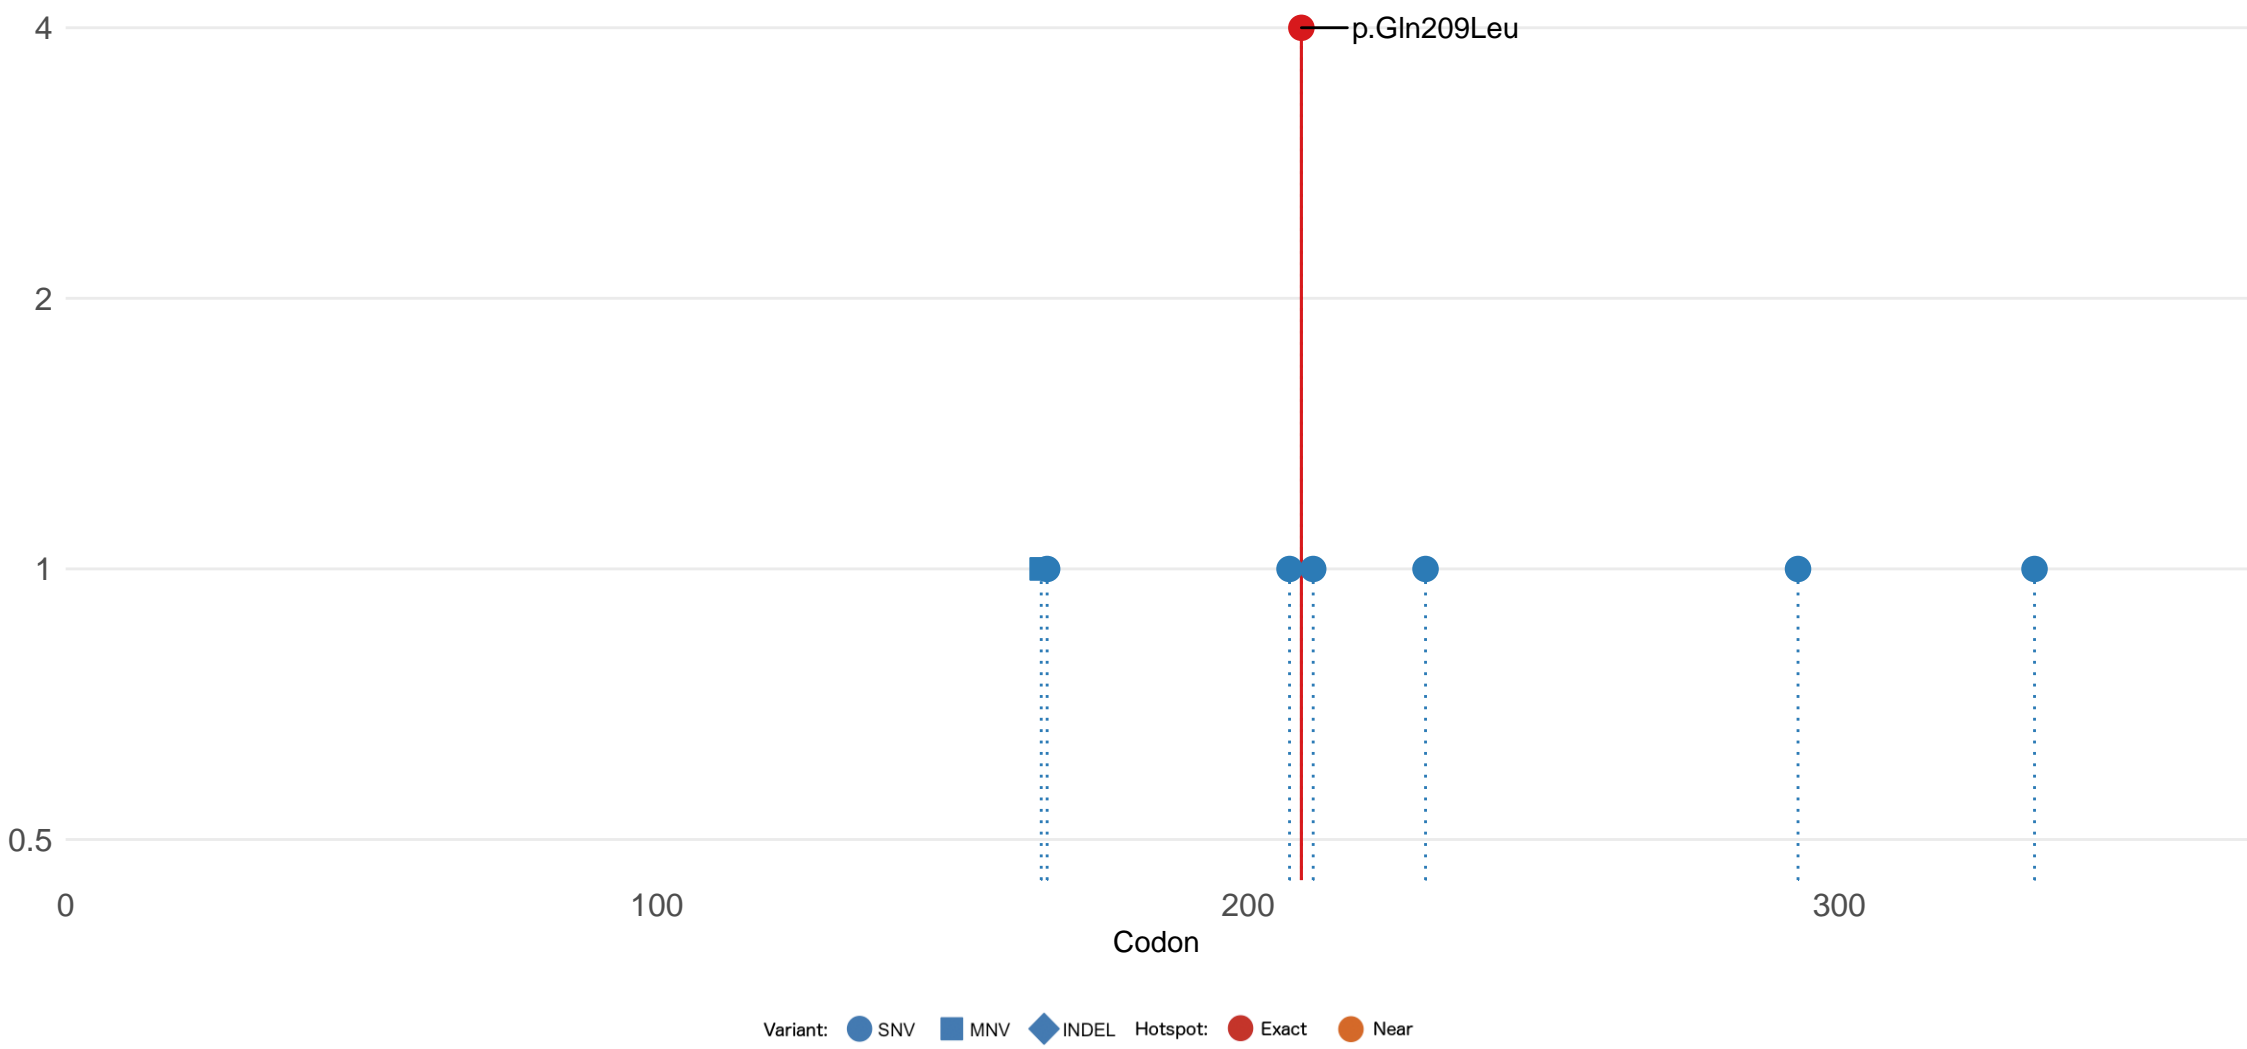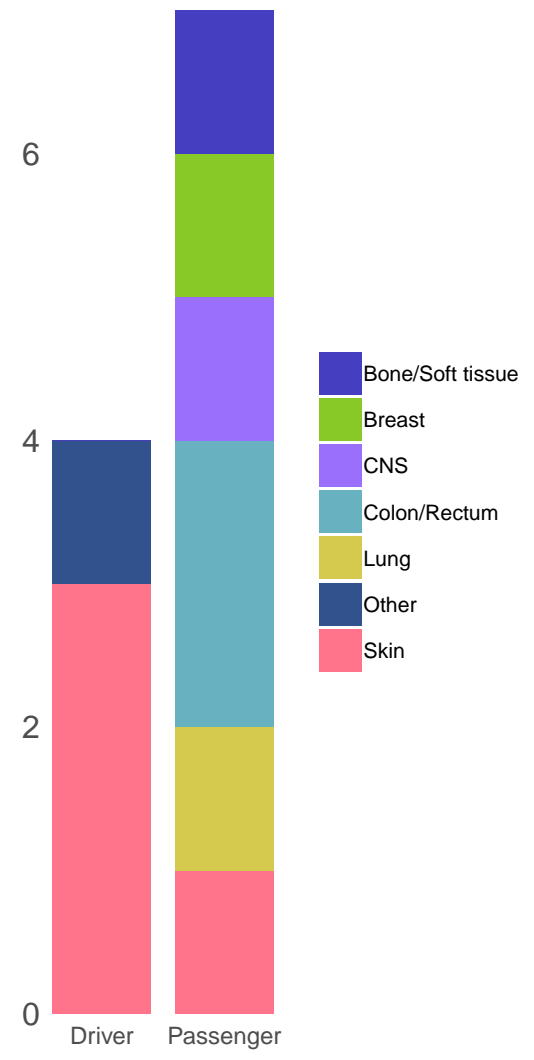

# GNAQ Variants

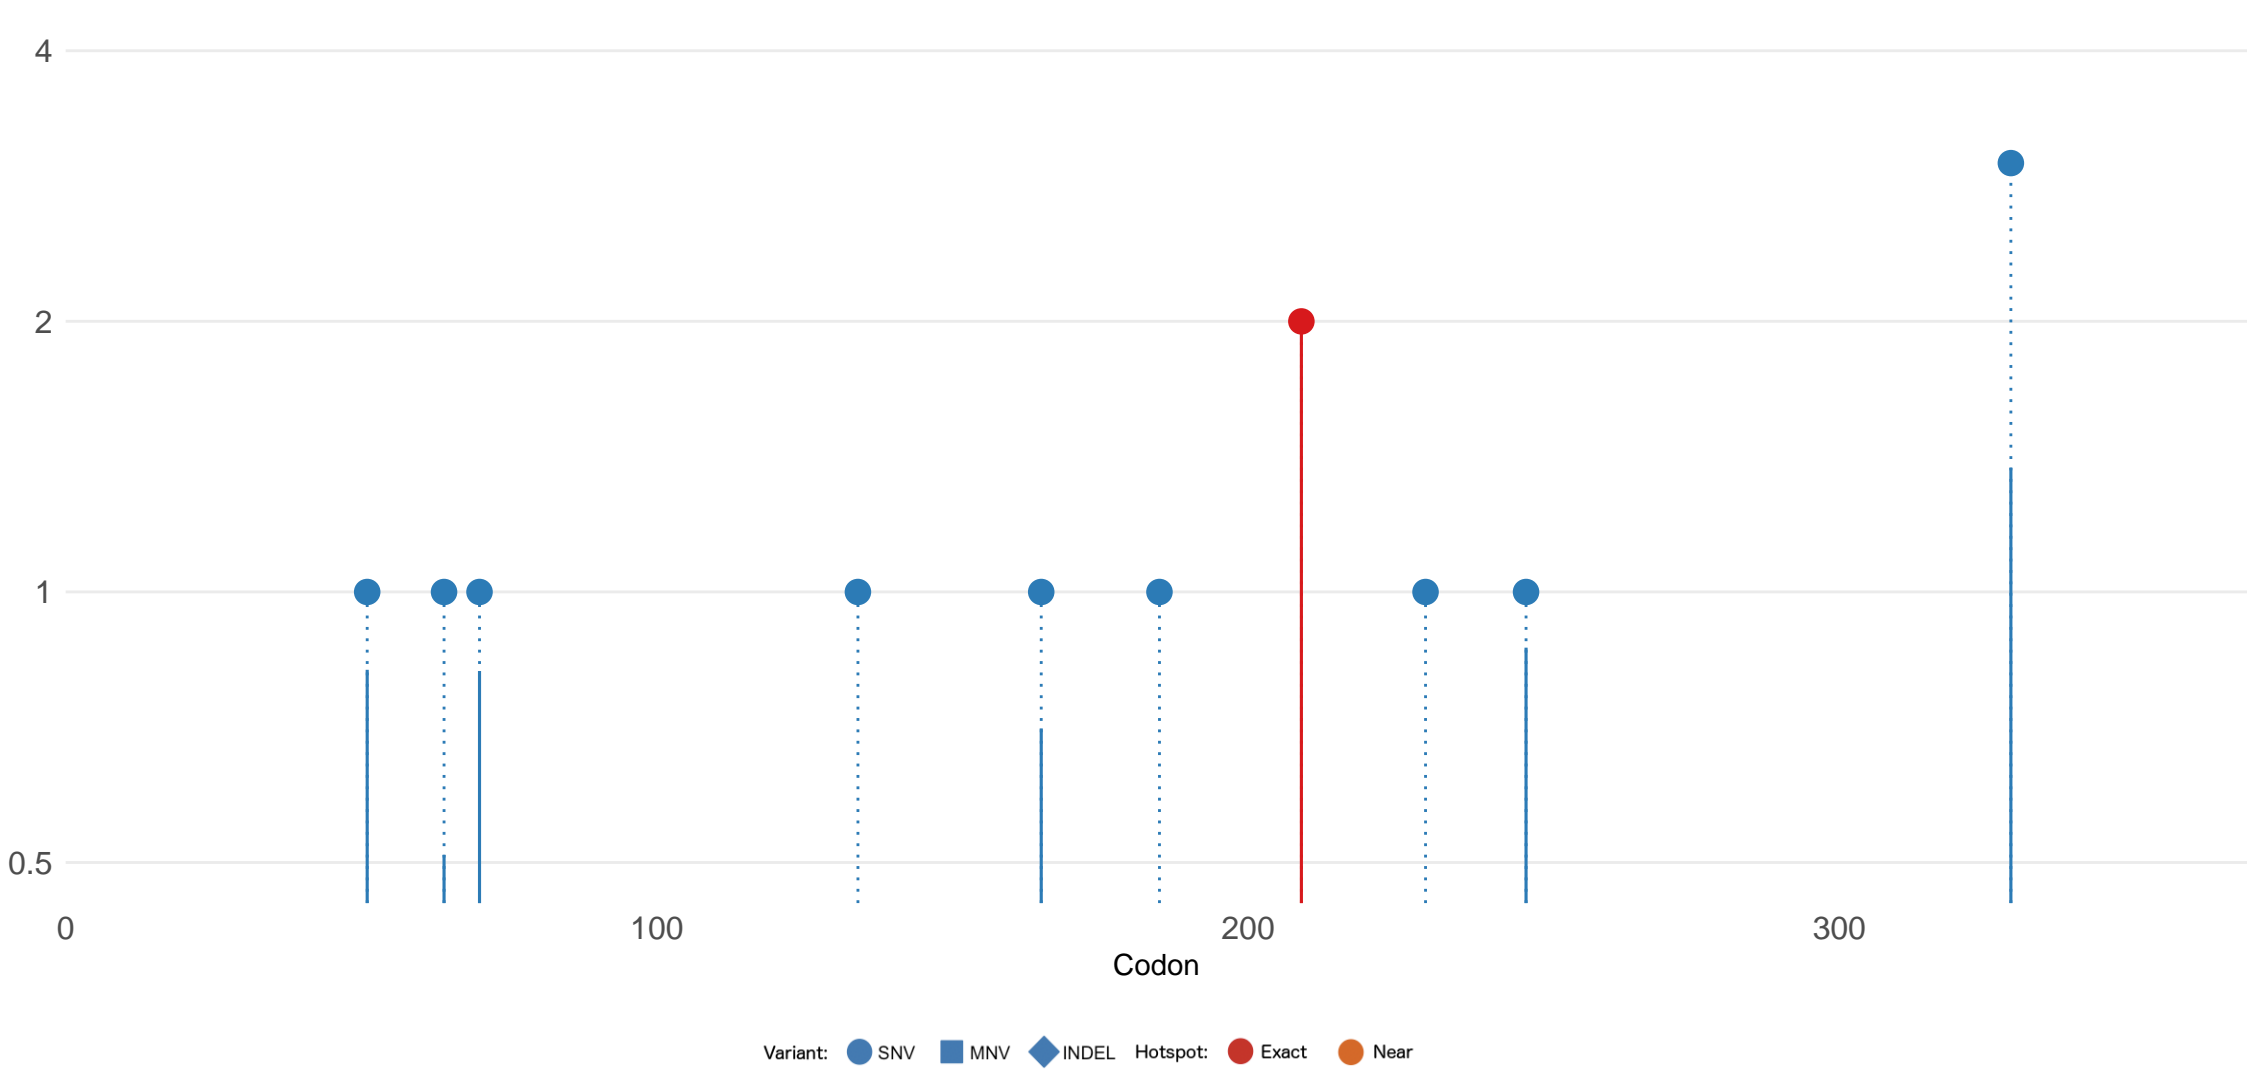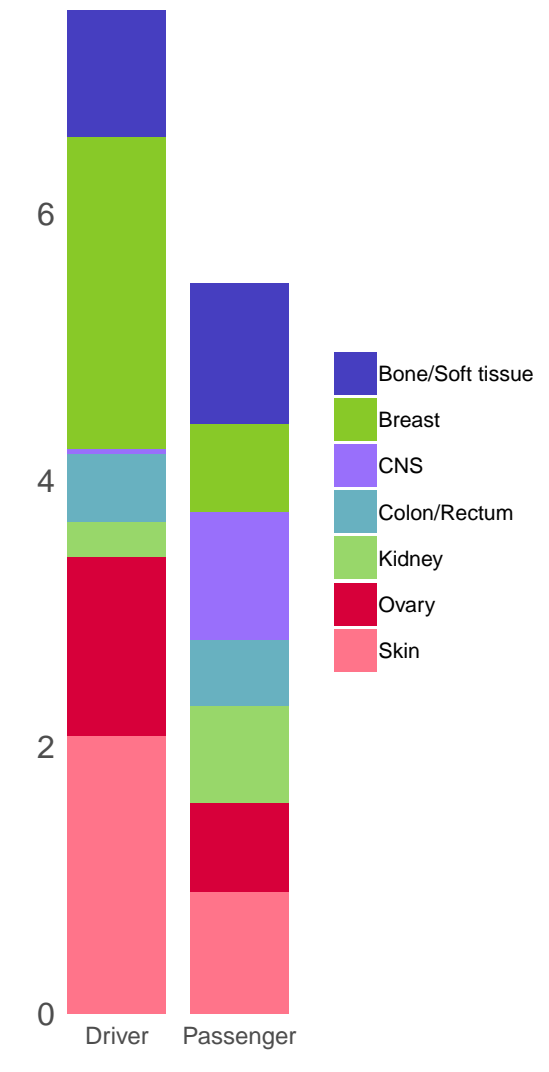

# GNAS Variants

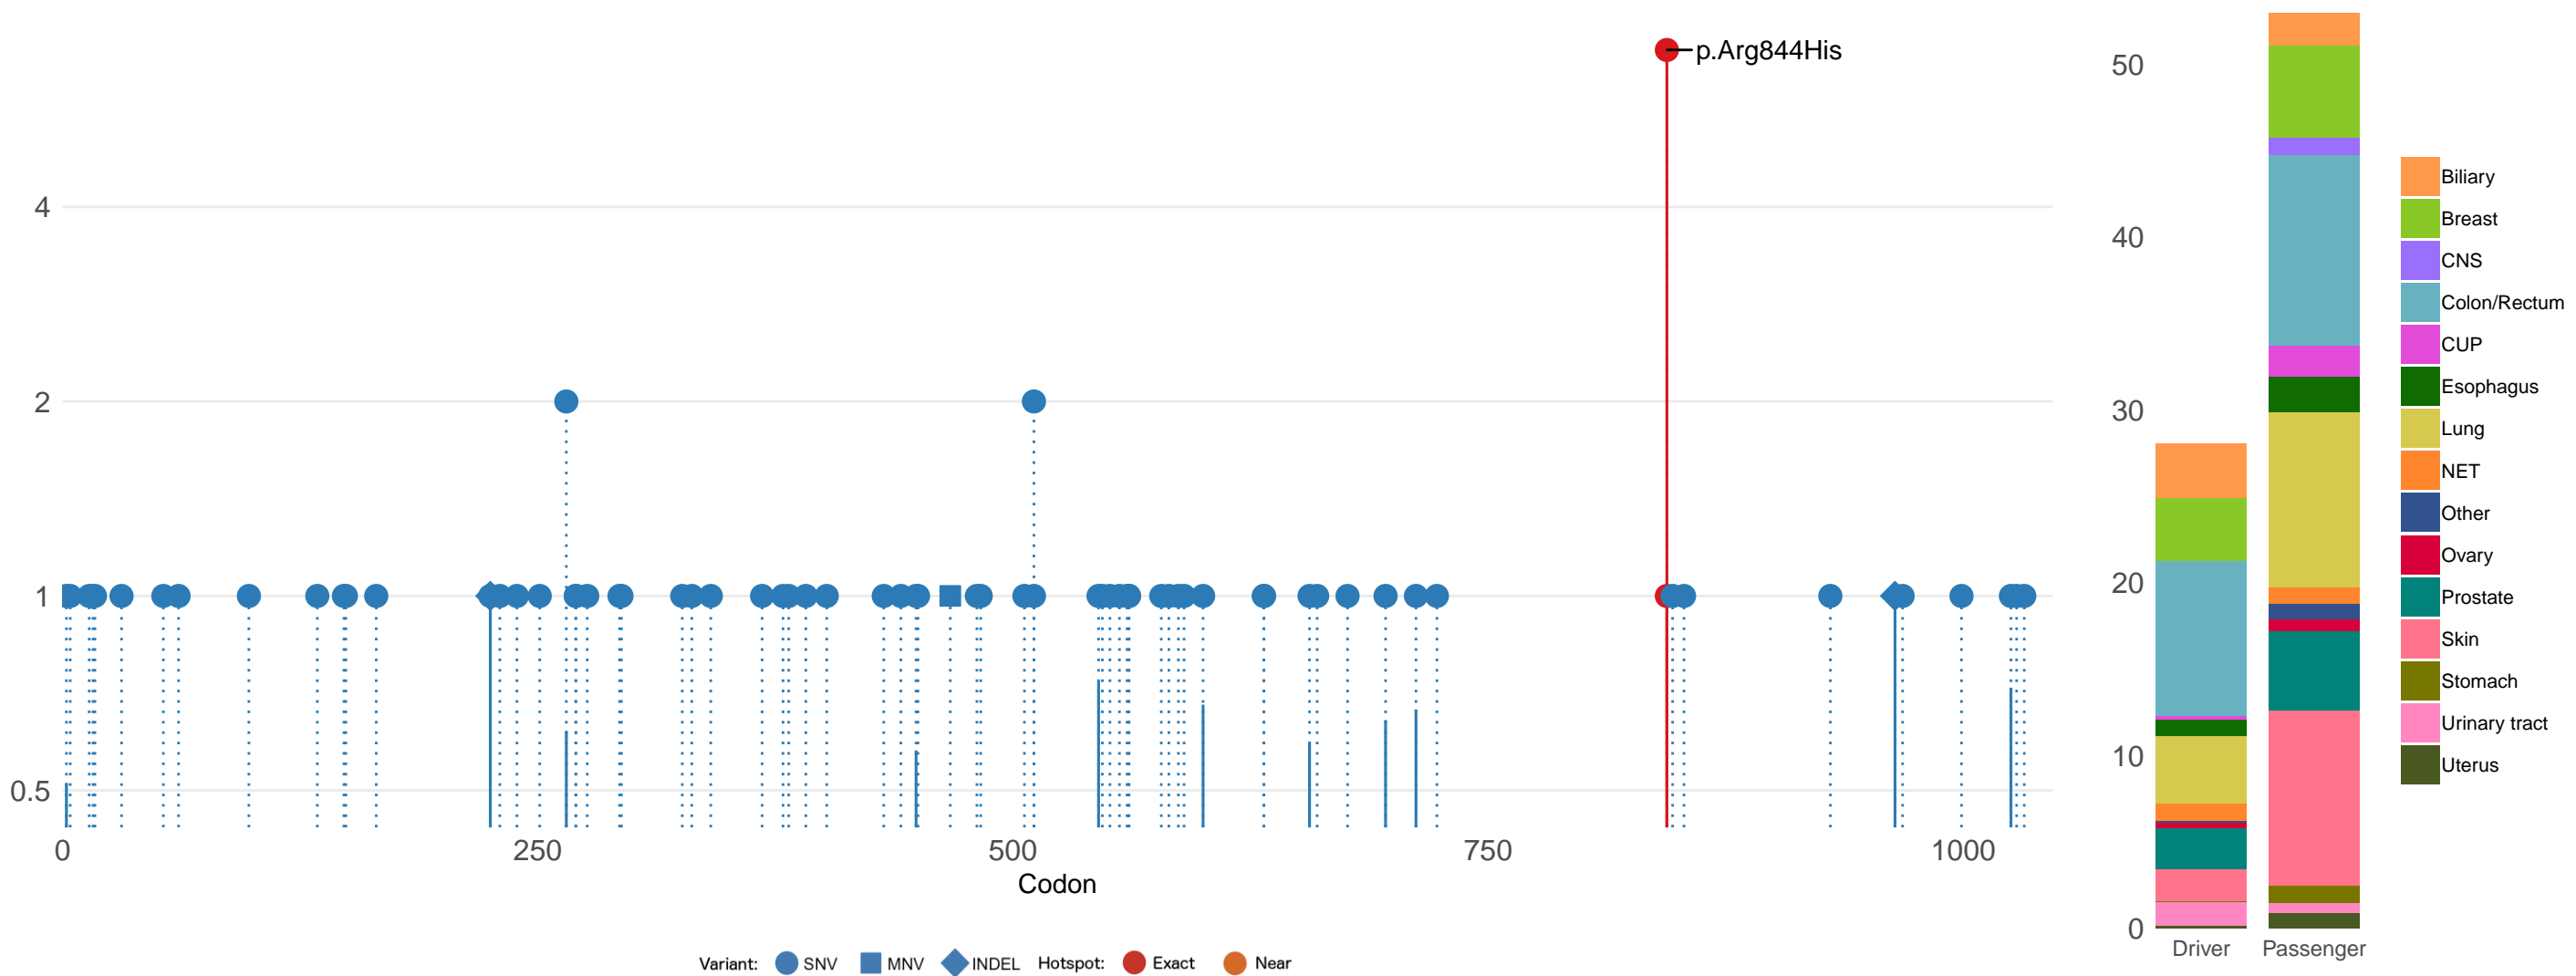

# H3F3A Variants

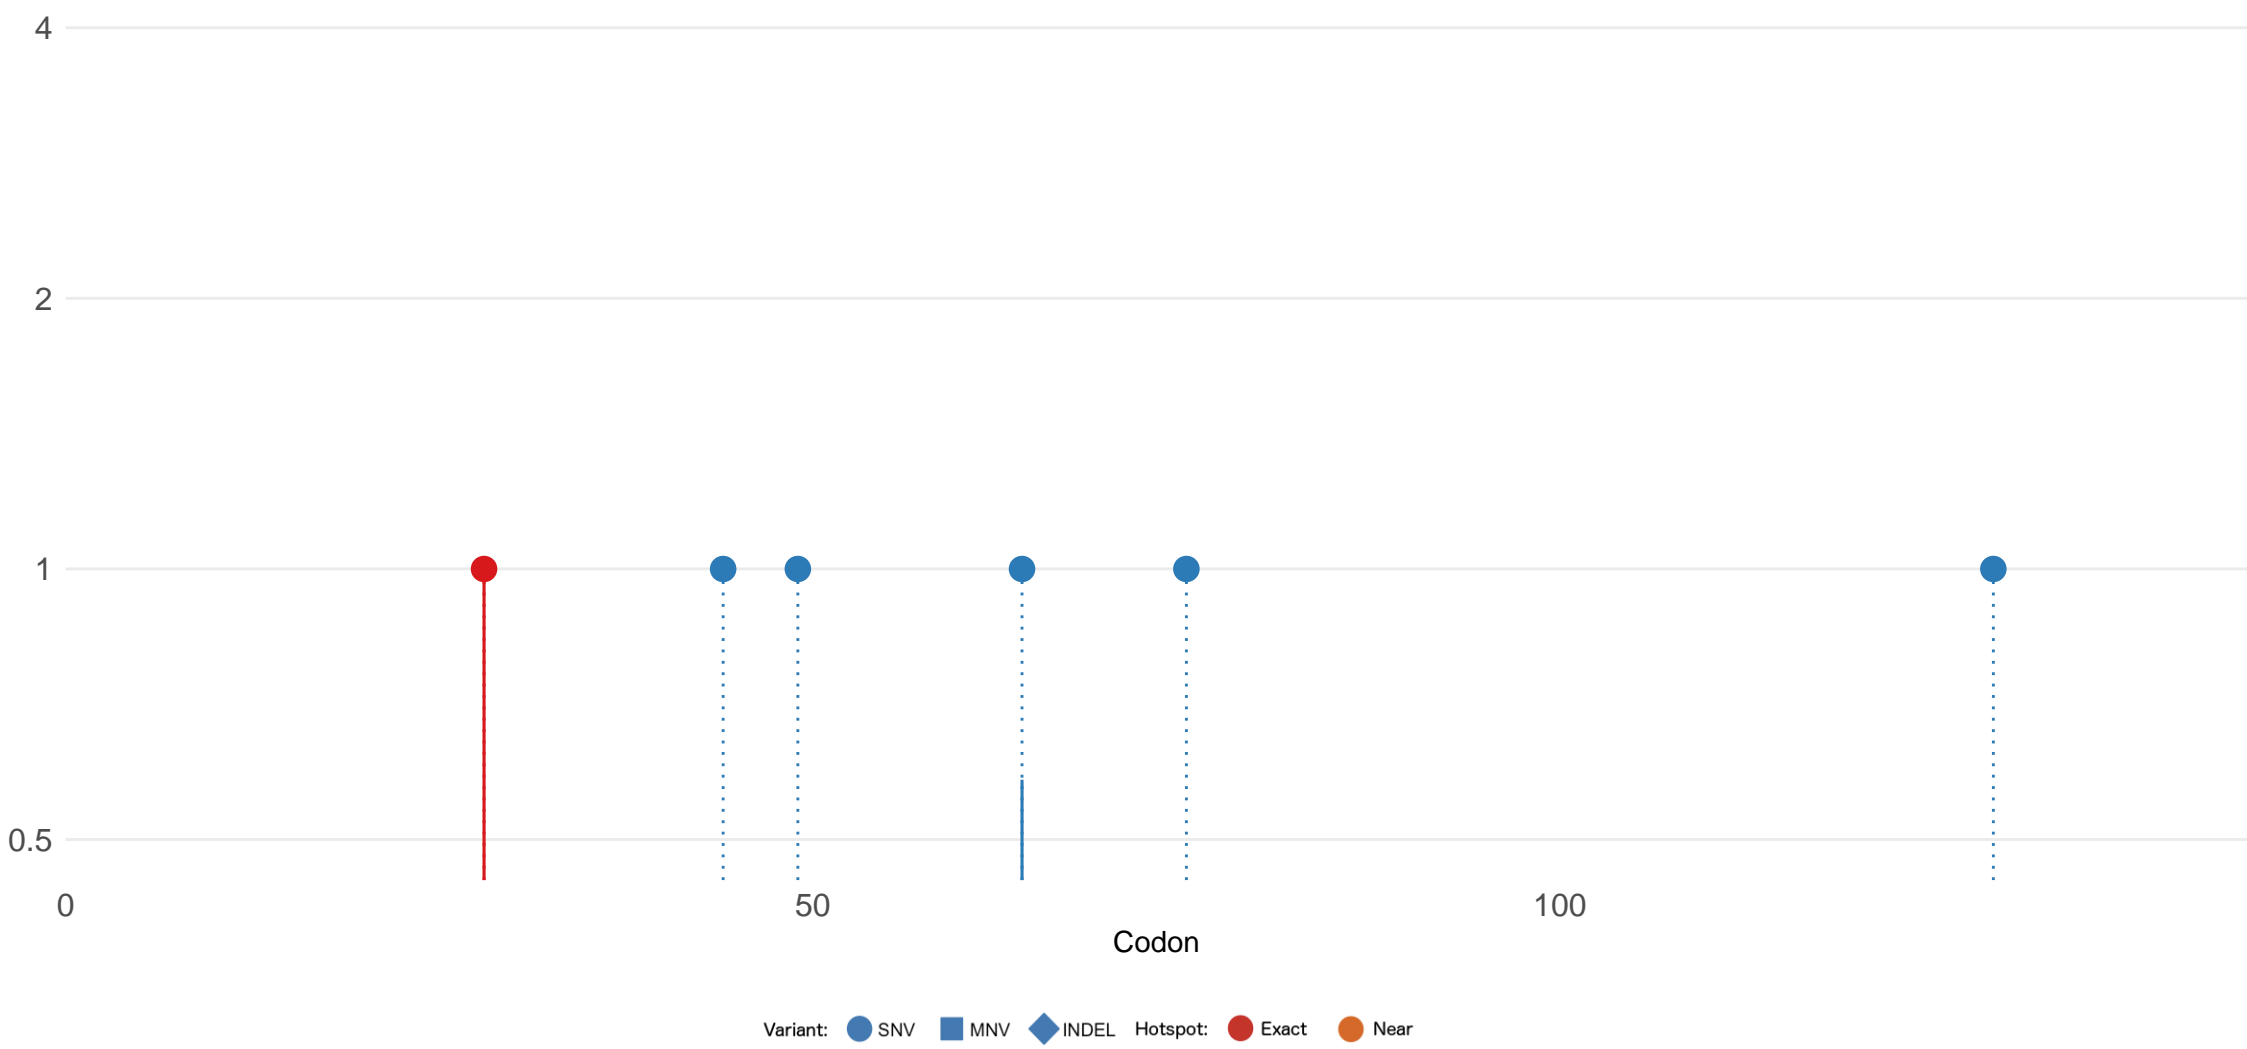

Variant: ● SNV ■ MNV ◆ INDEL Hotspot: ● Exact ● Near

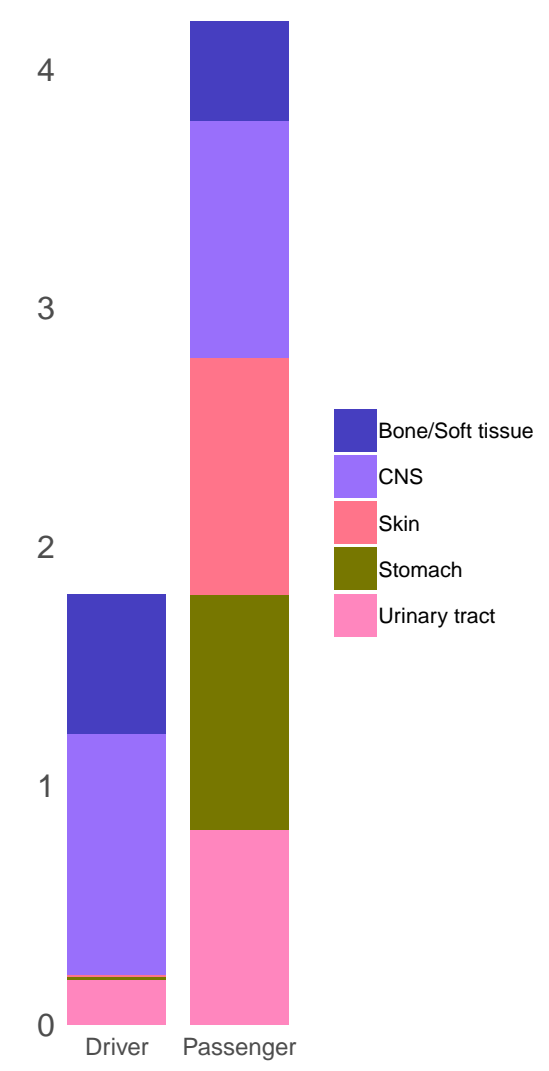



# H3F3B Variants

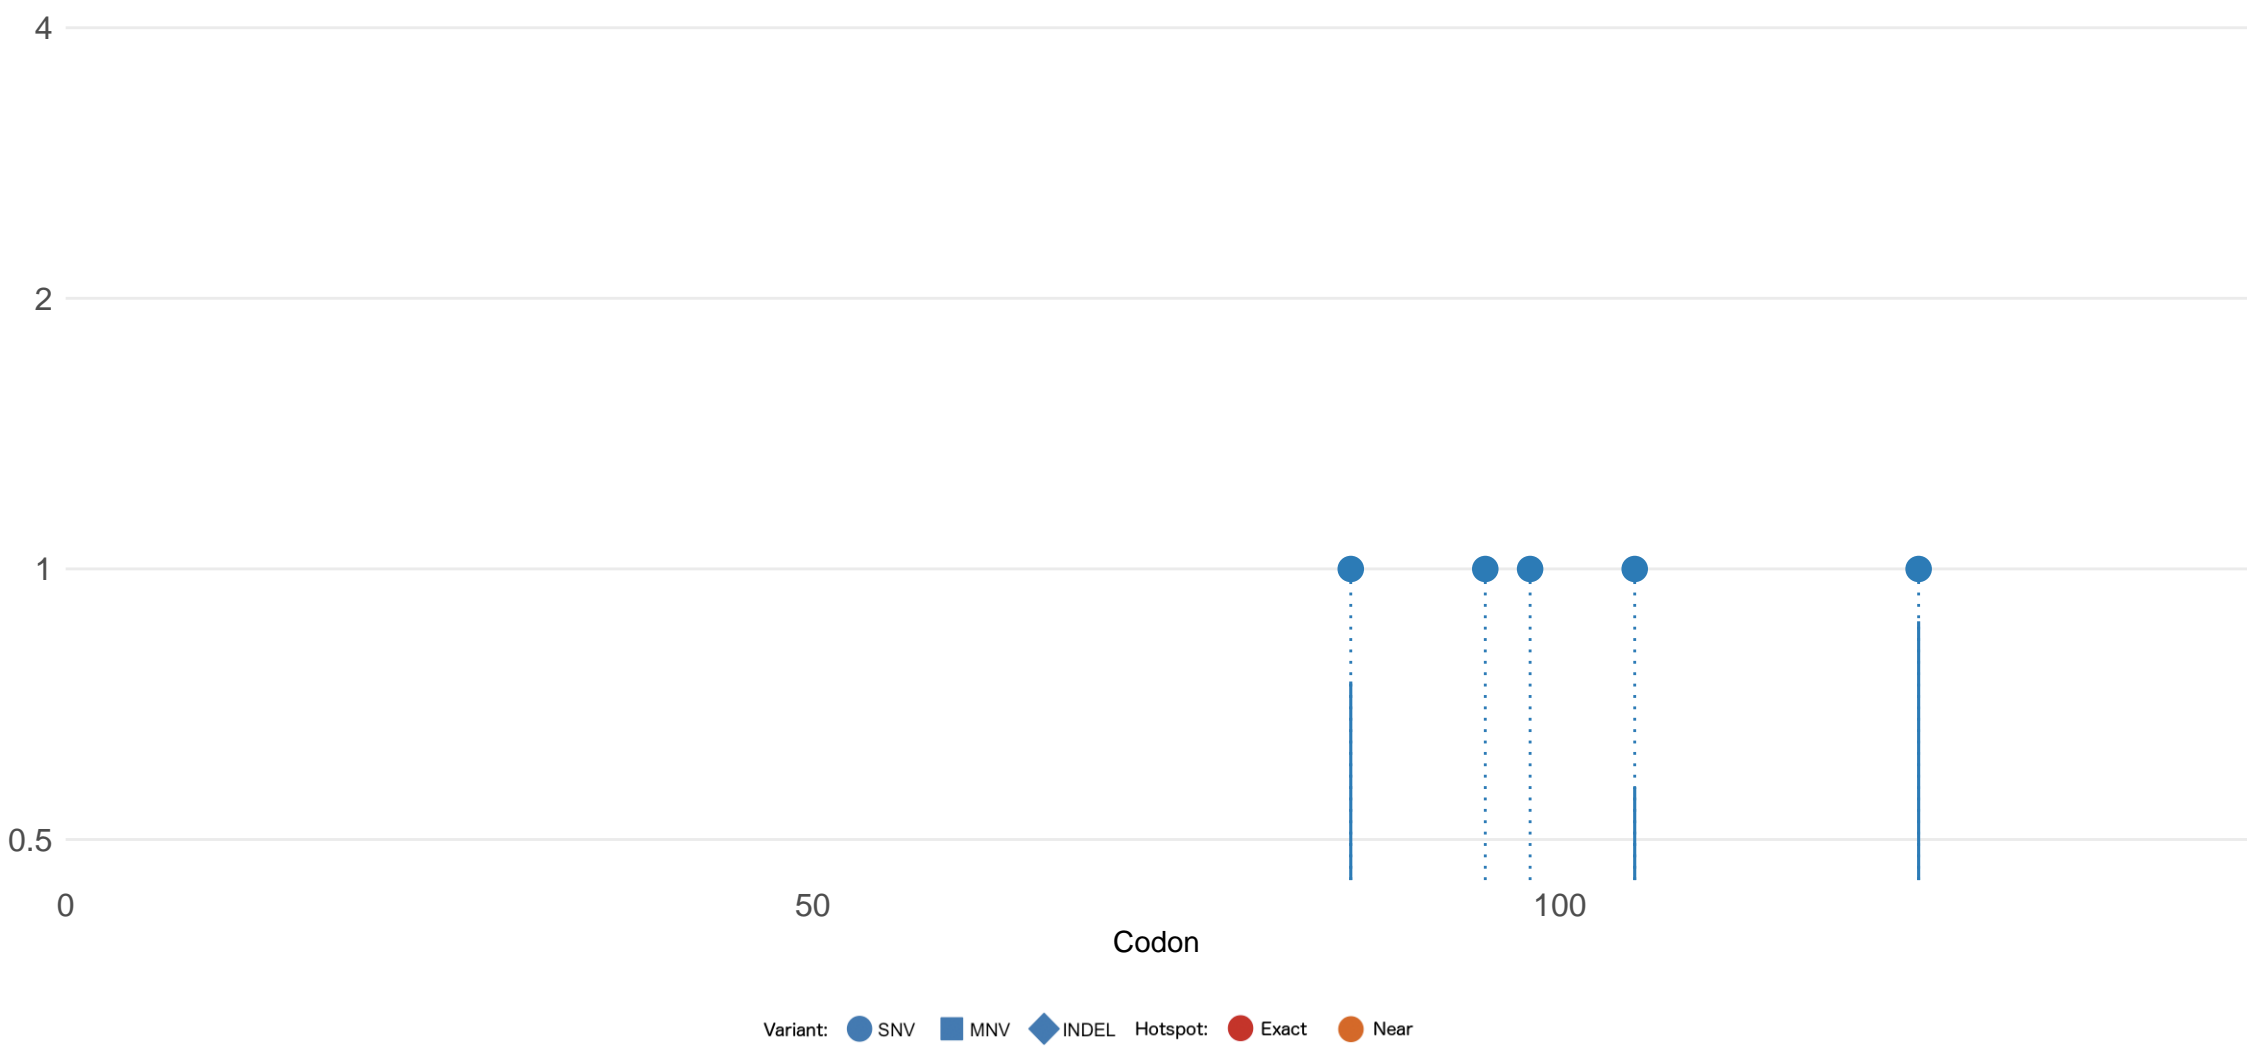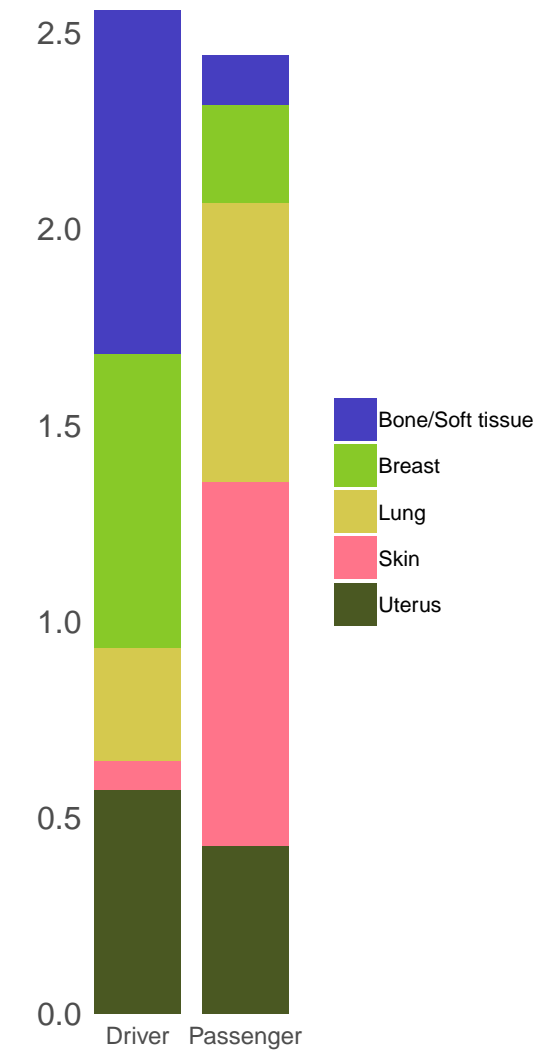

# HIF1A Variants

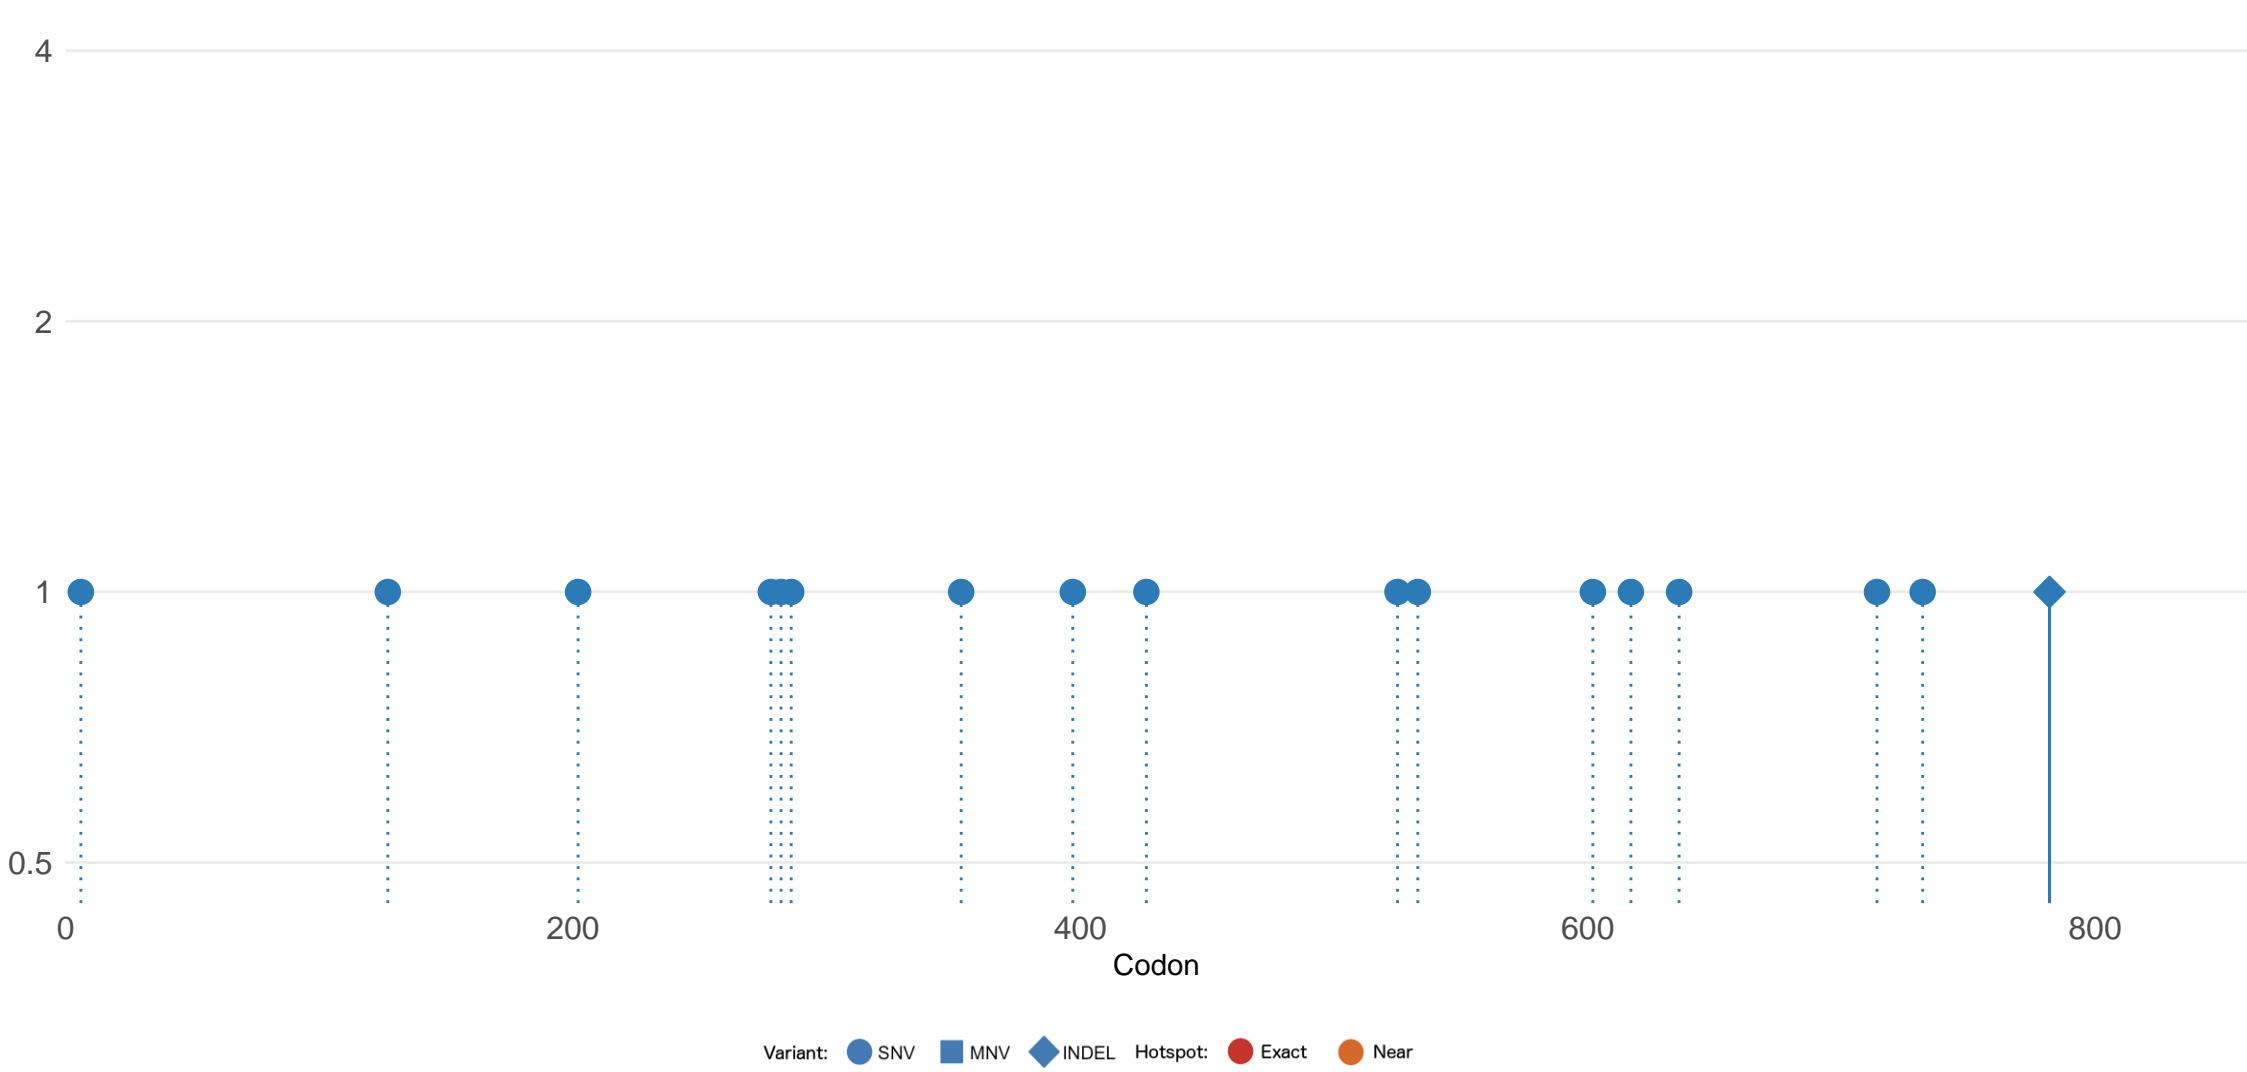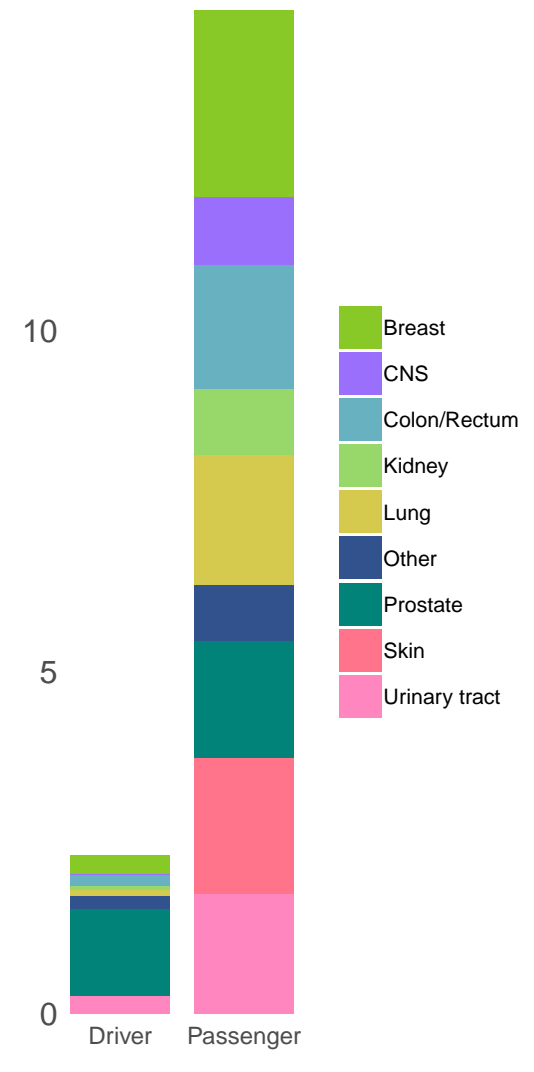

# HIST1H1C Variants

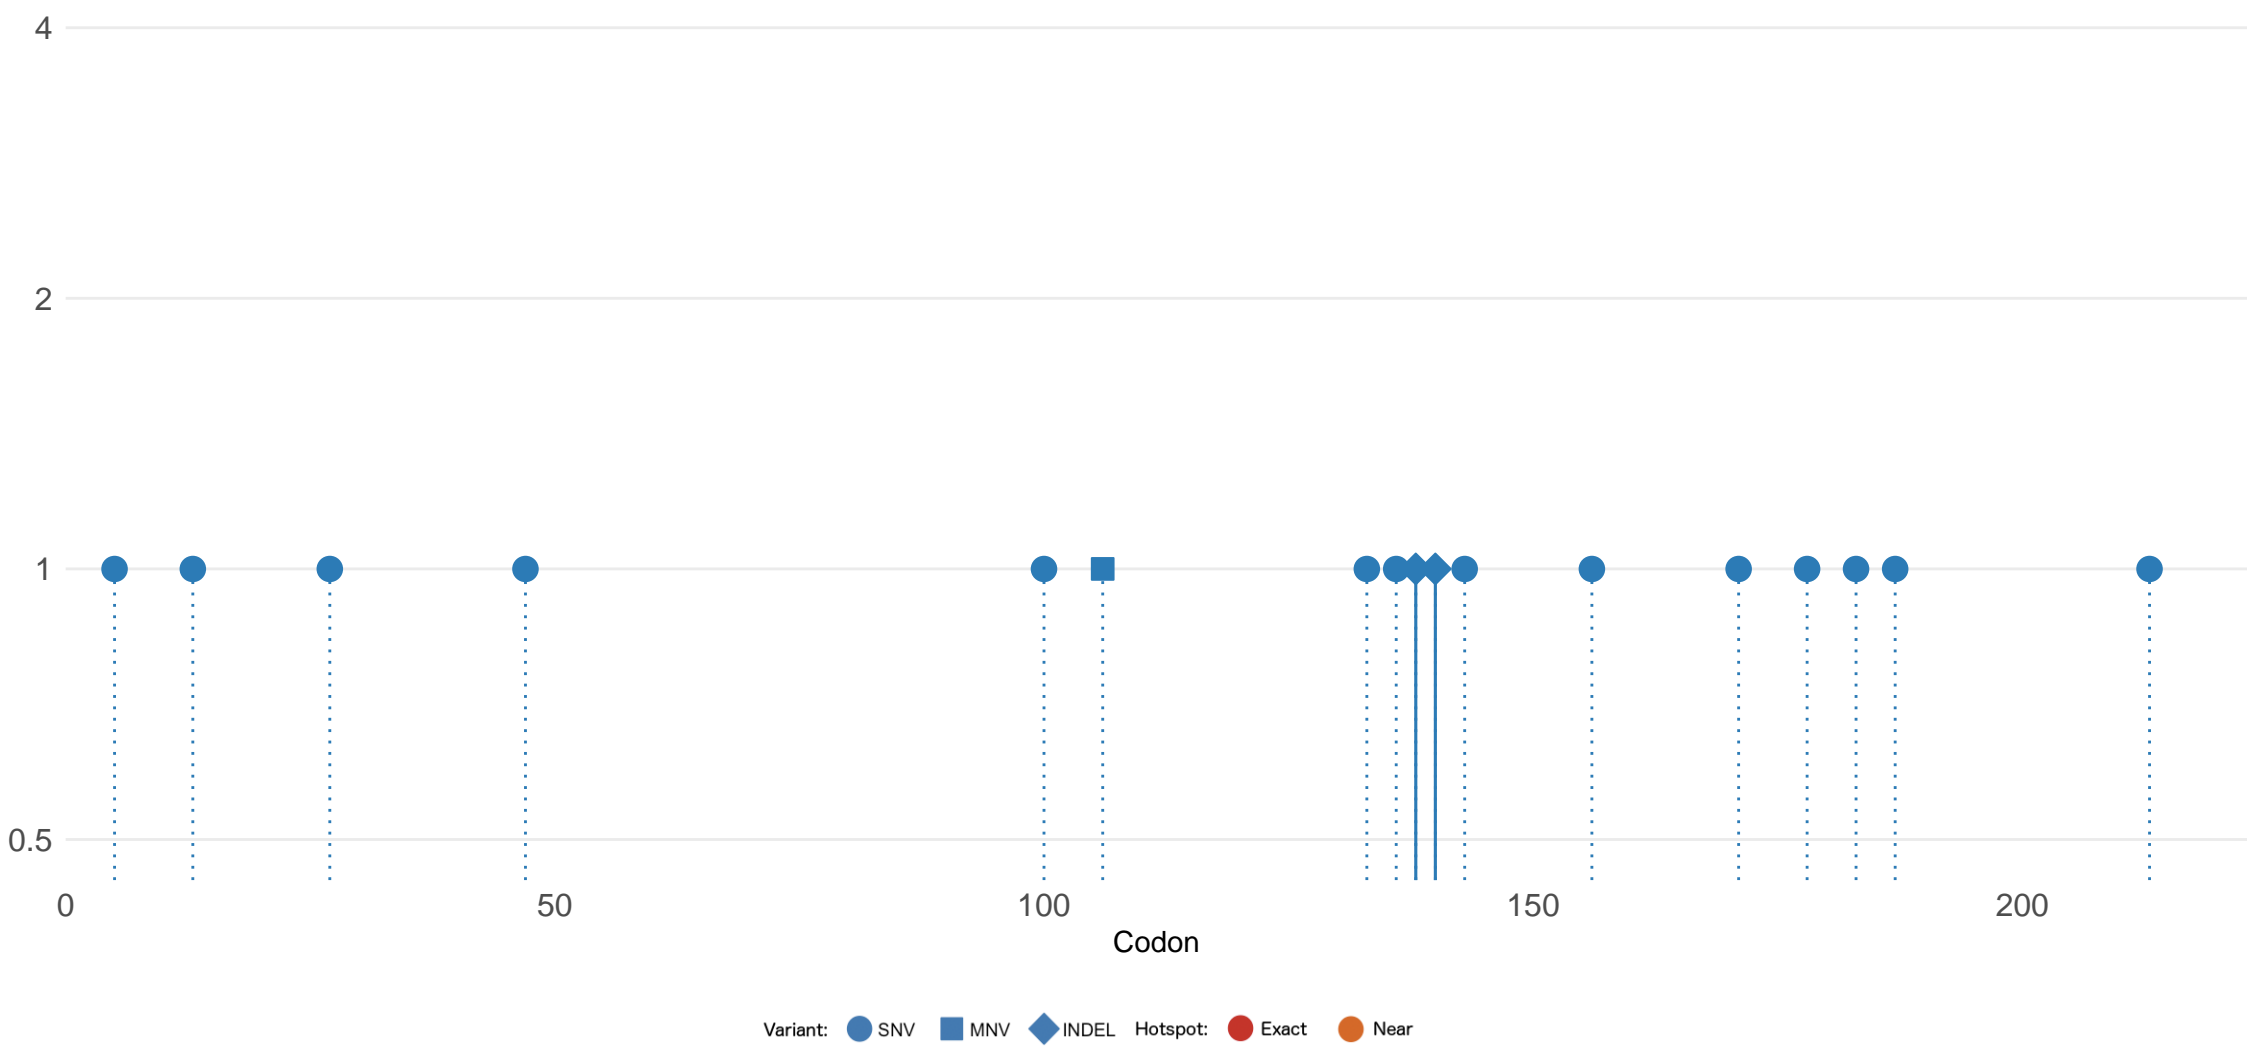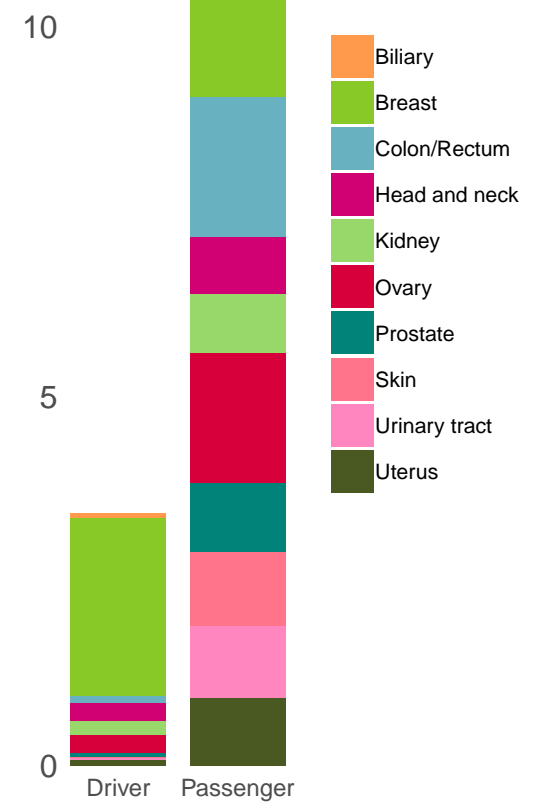

# HIST1H3B Variants

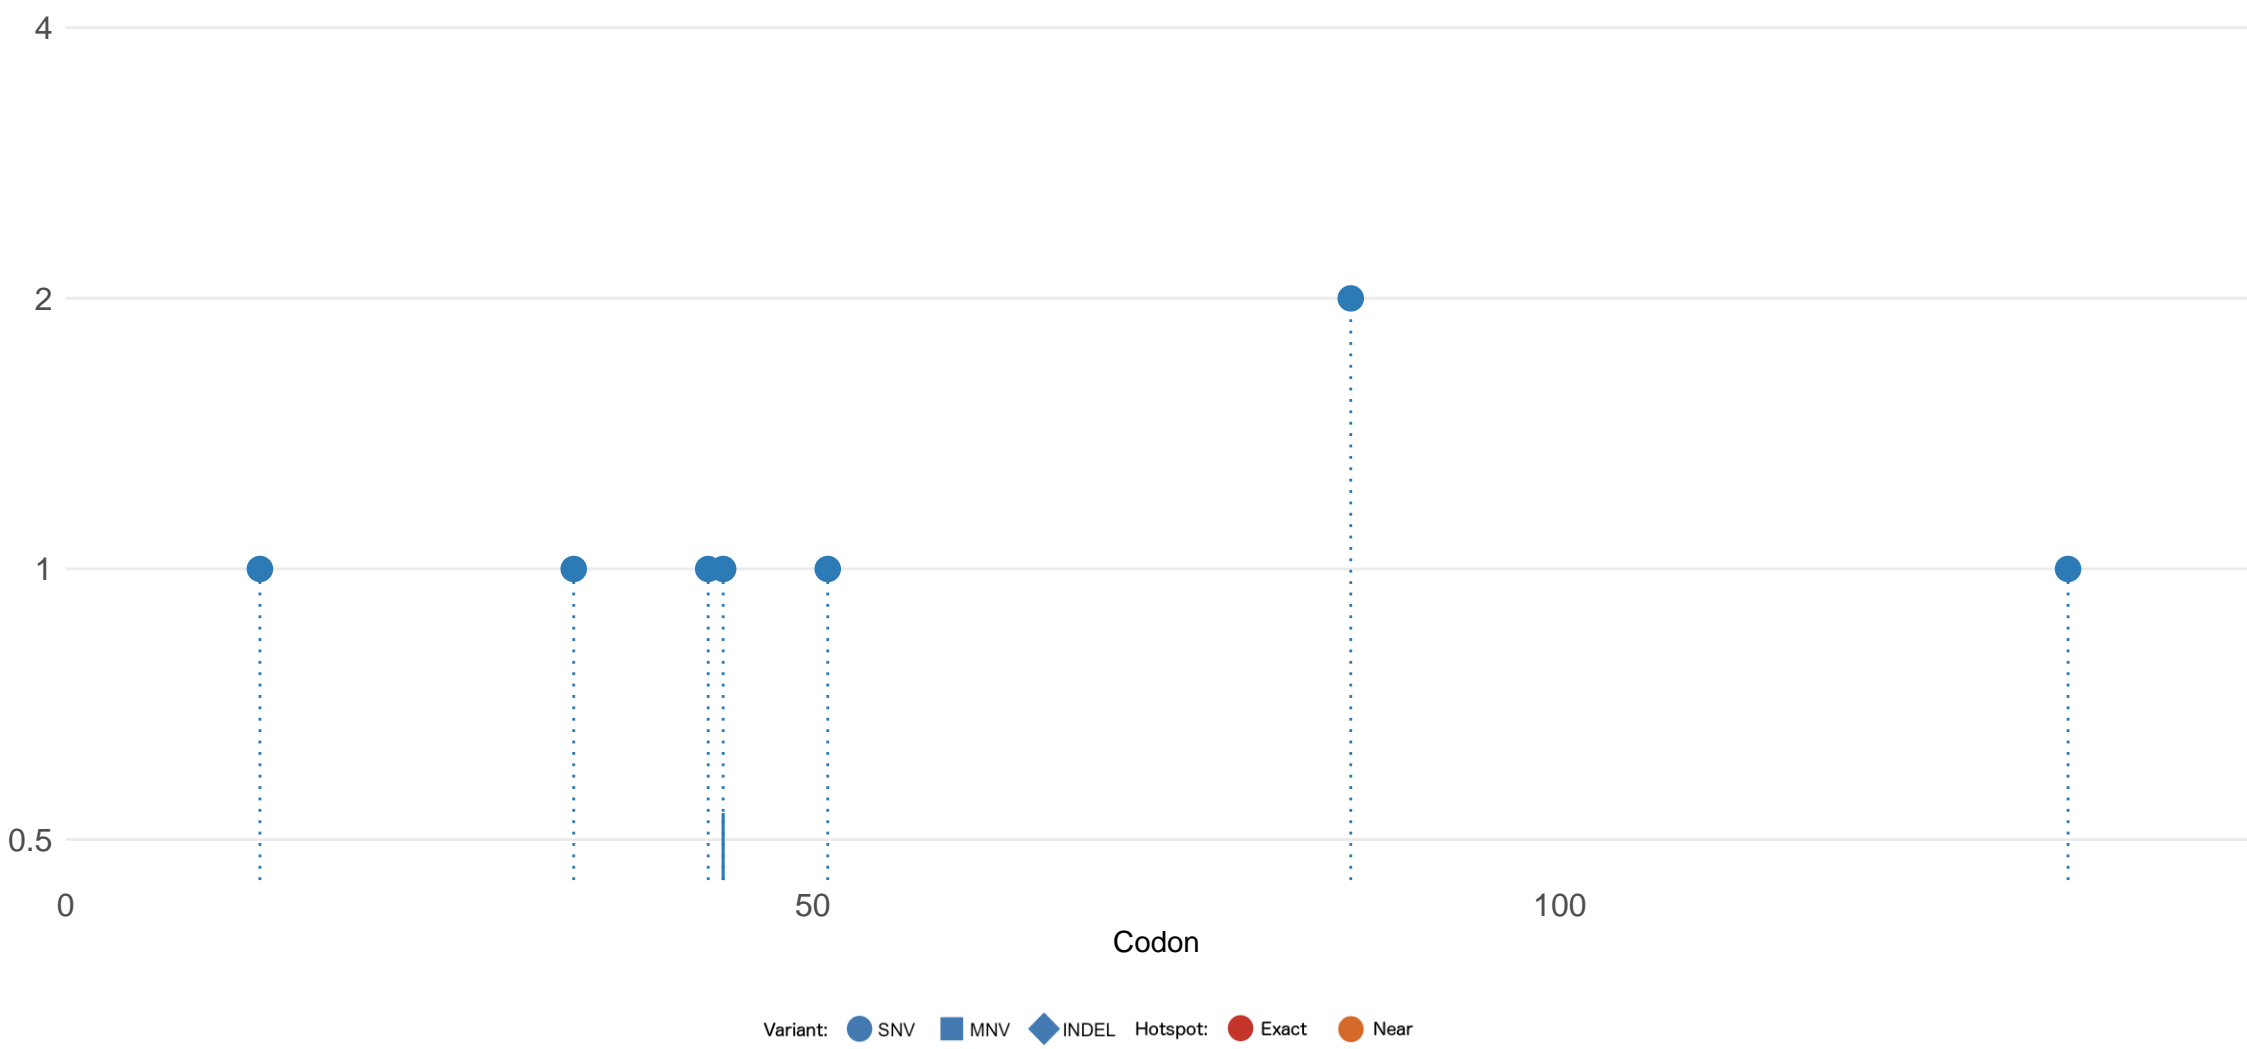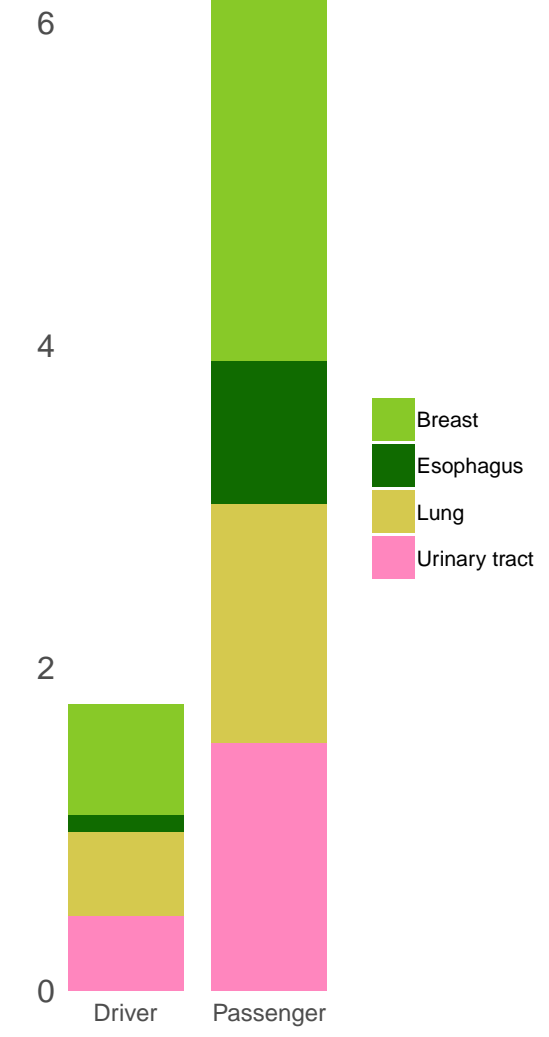

# HIST2H3D Variants

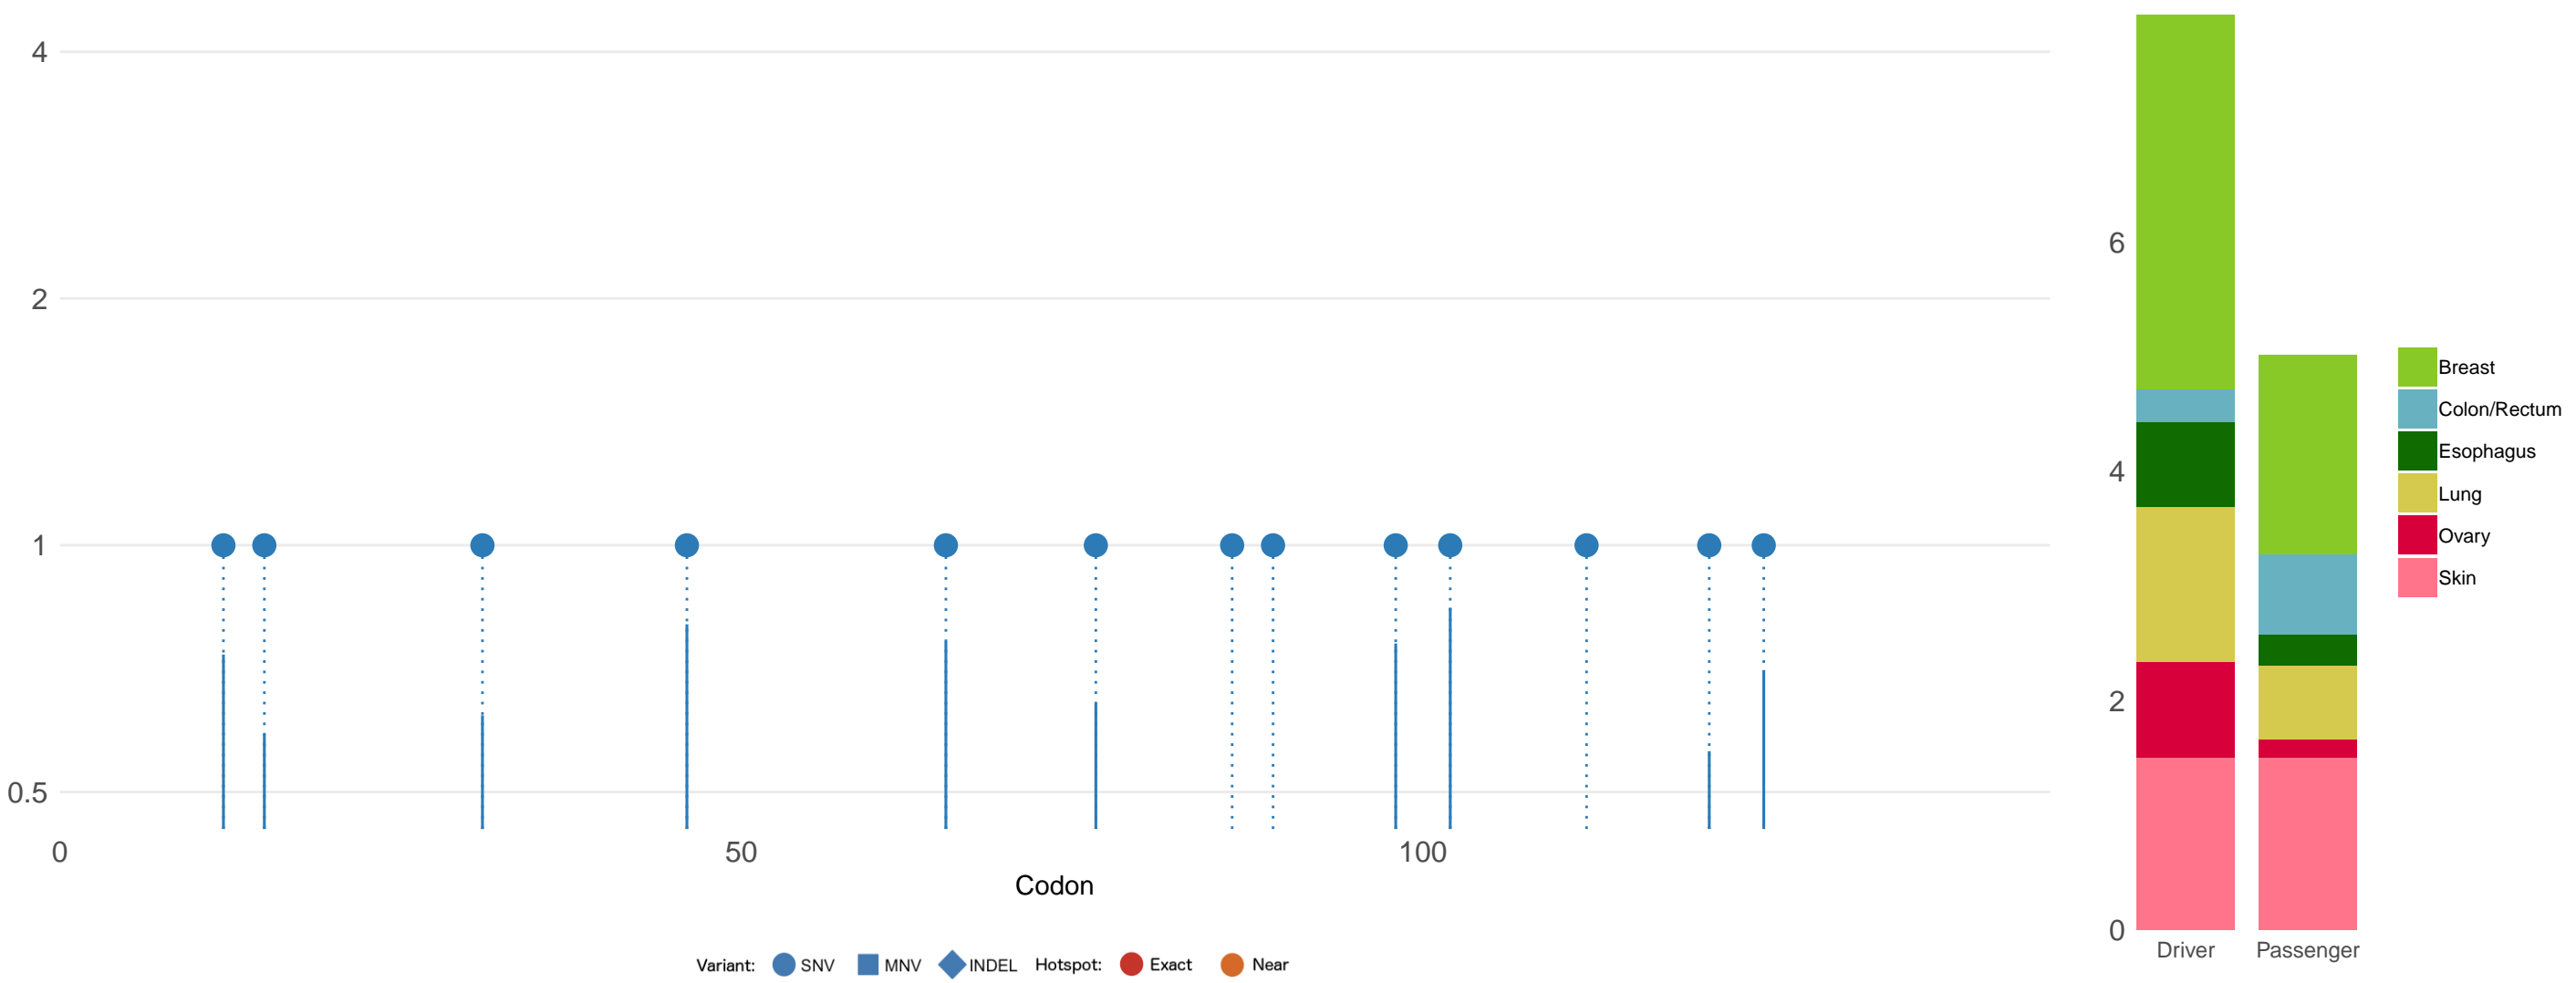

# HLA-C Variants

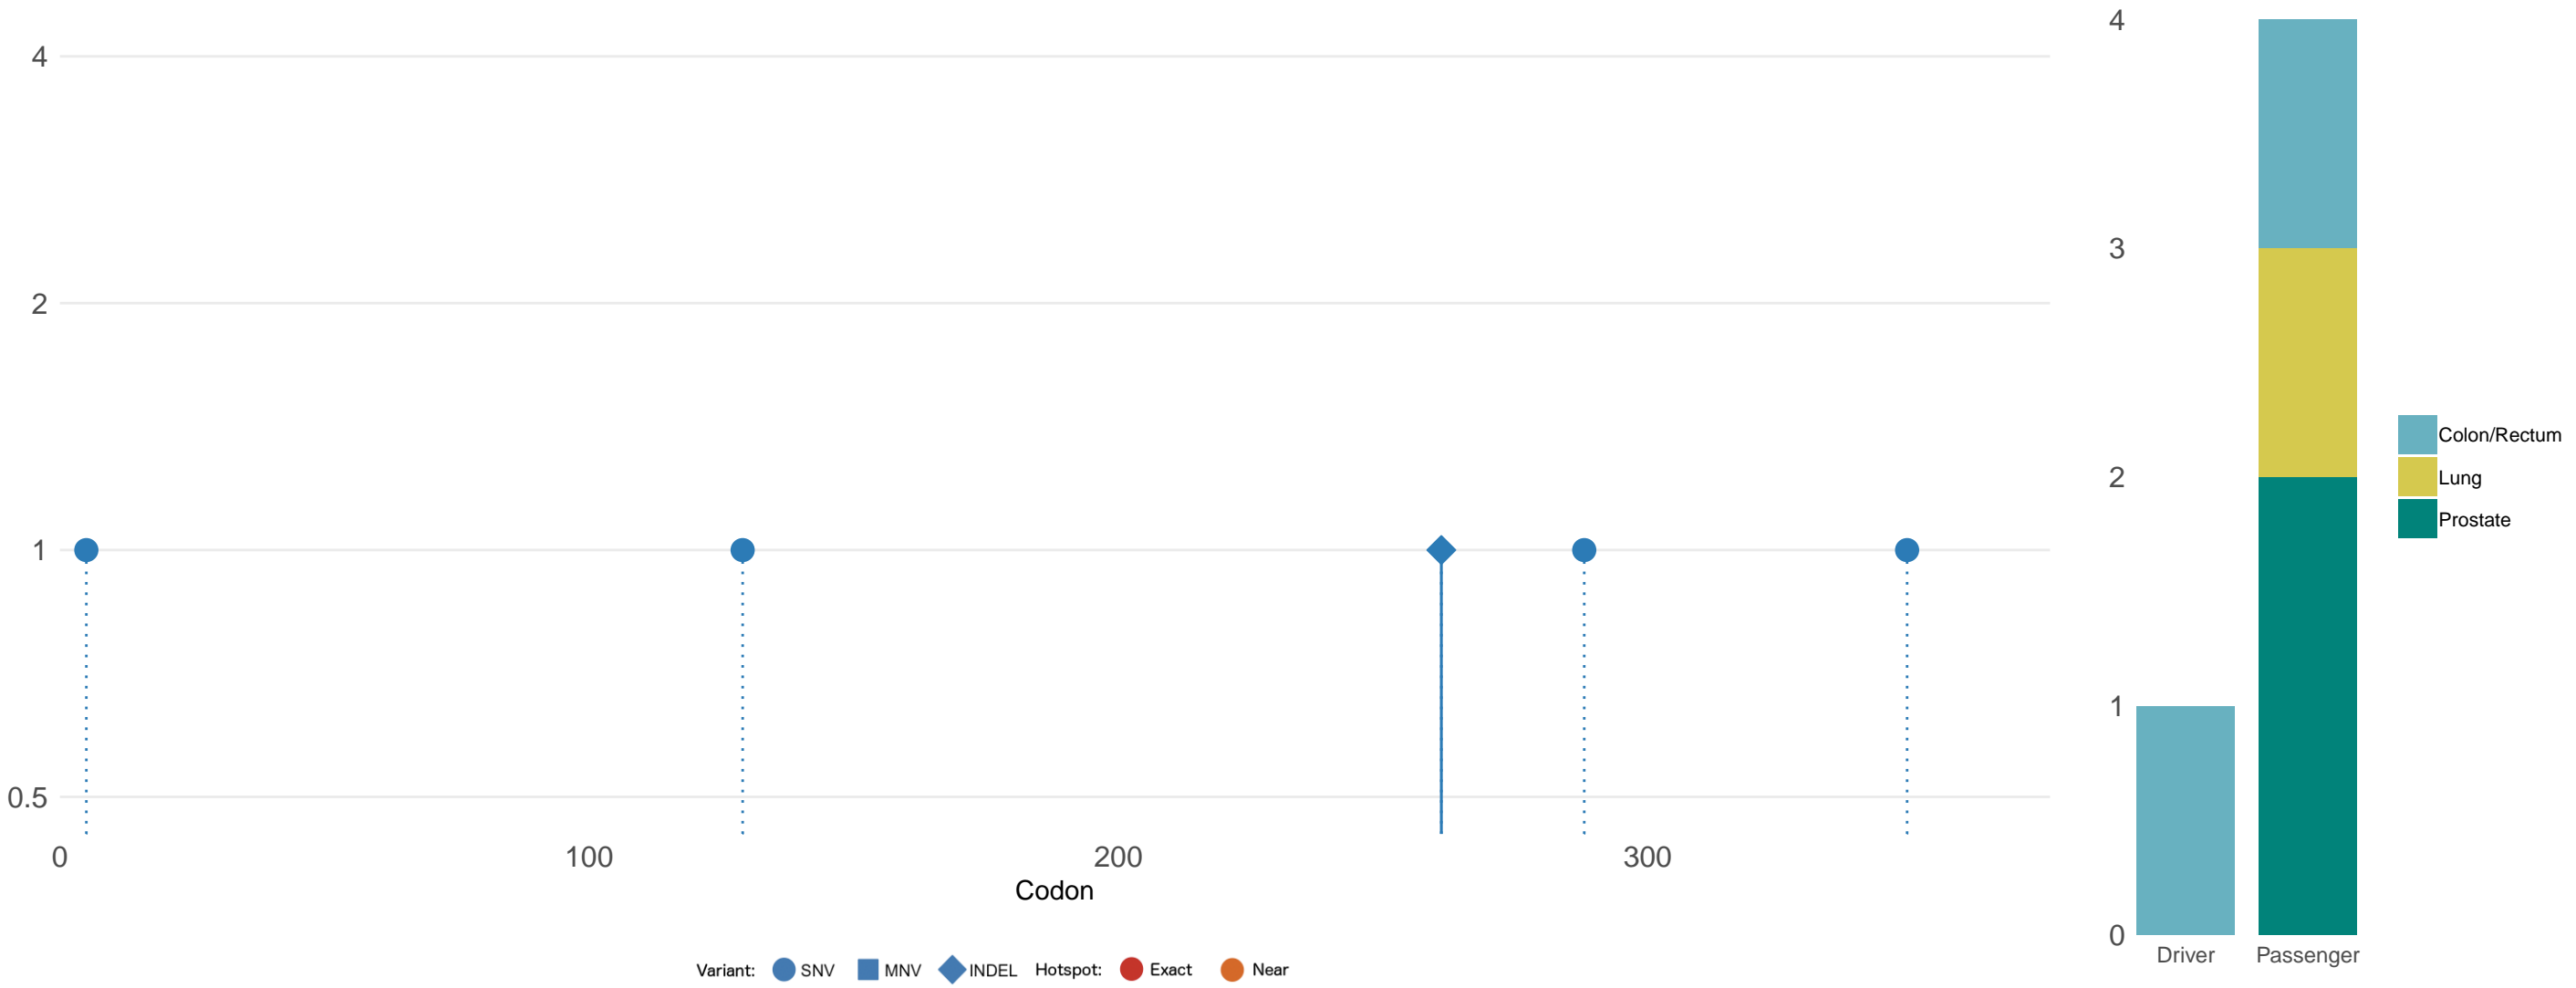

# HRAS Variants

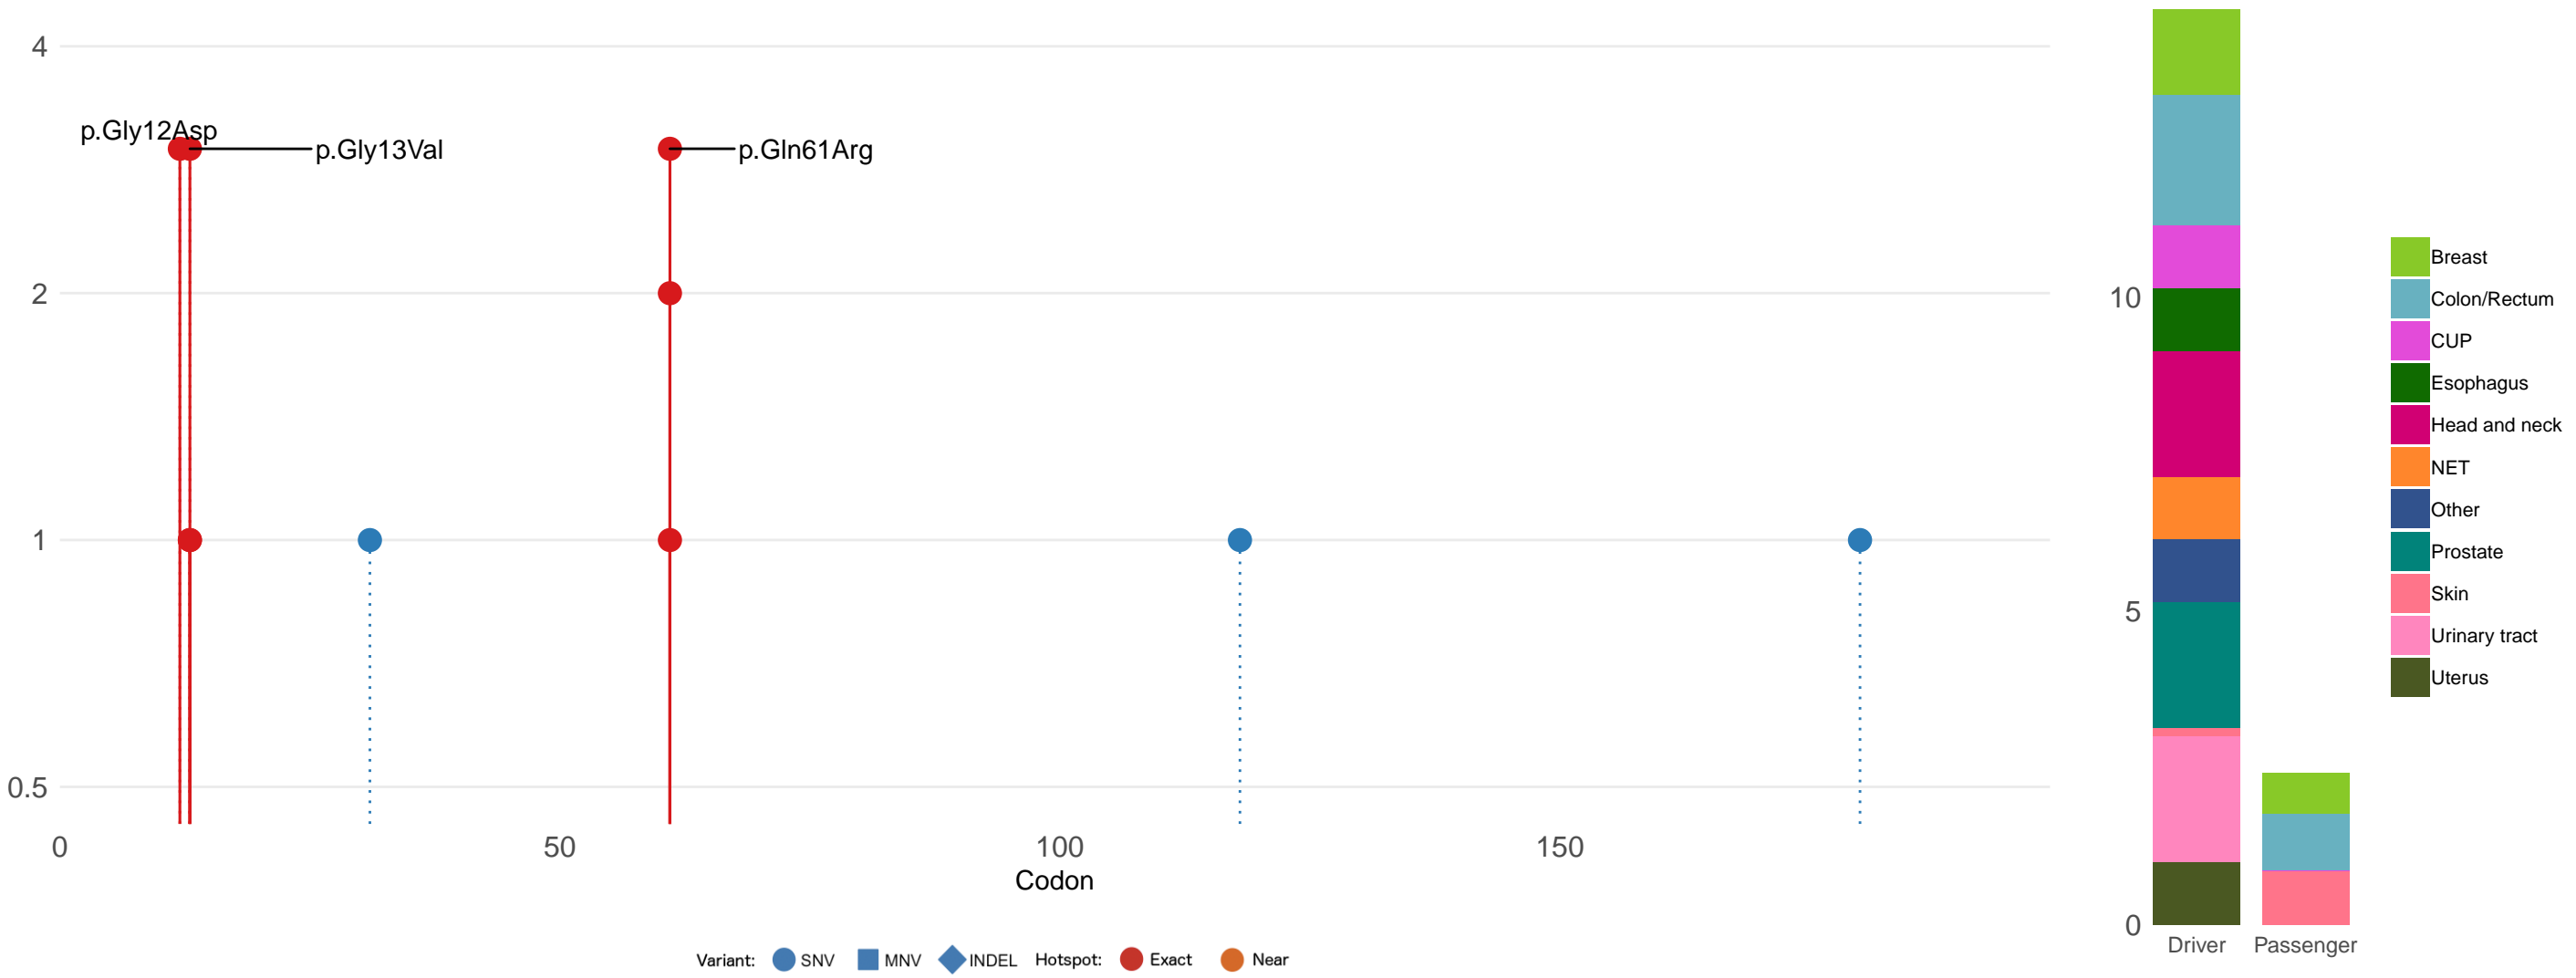

# IDH1 Variants

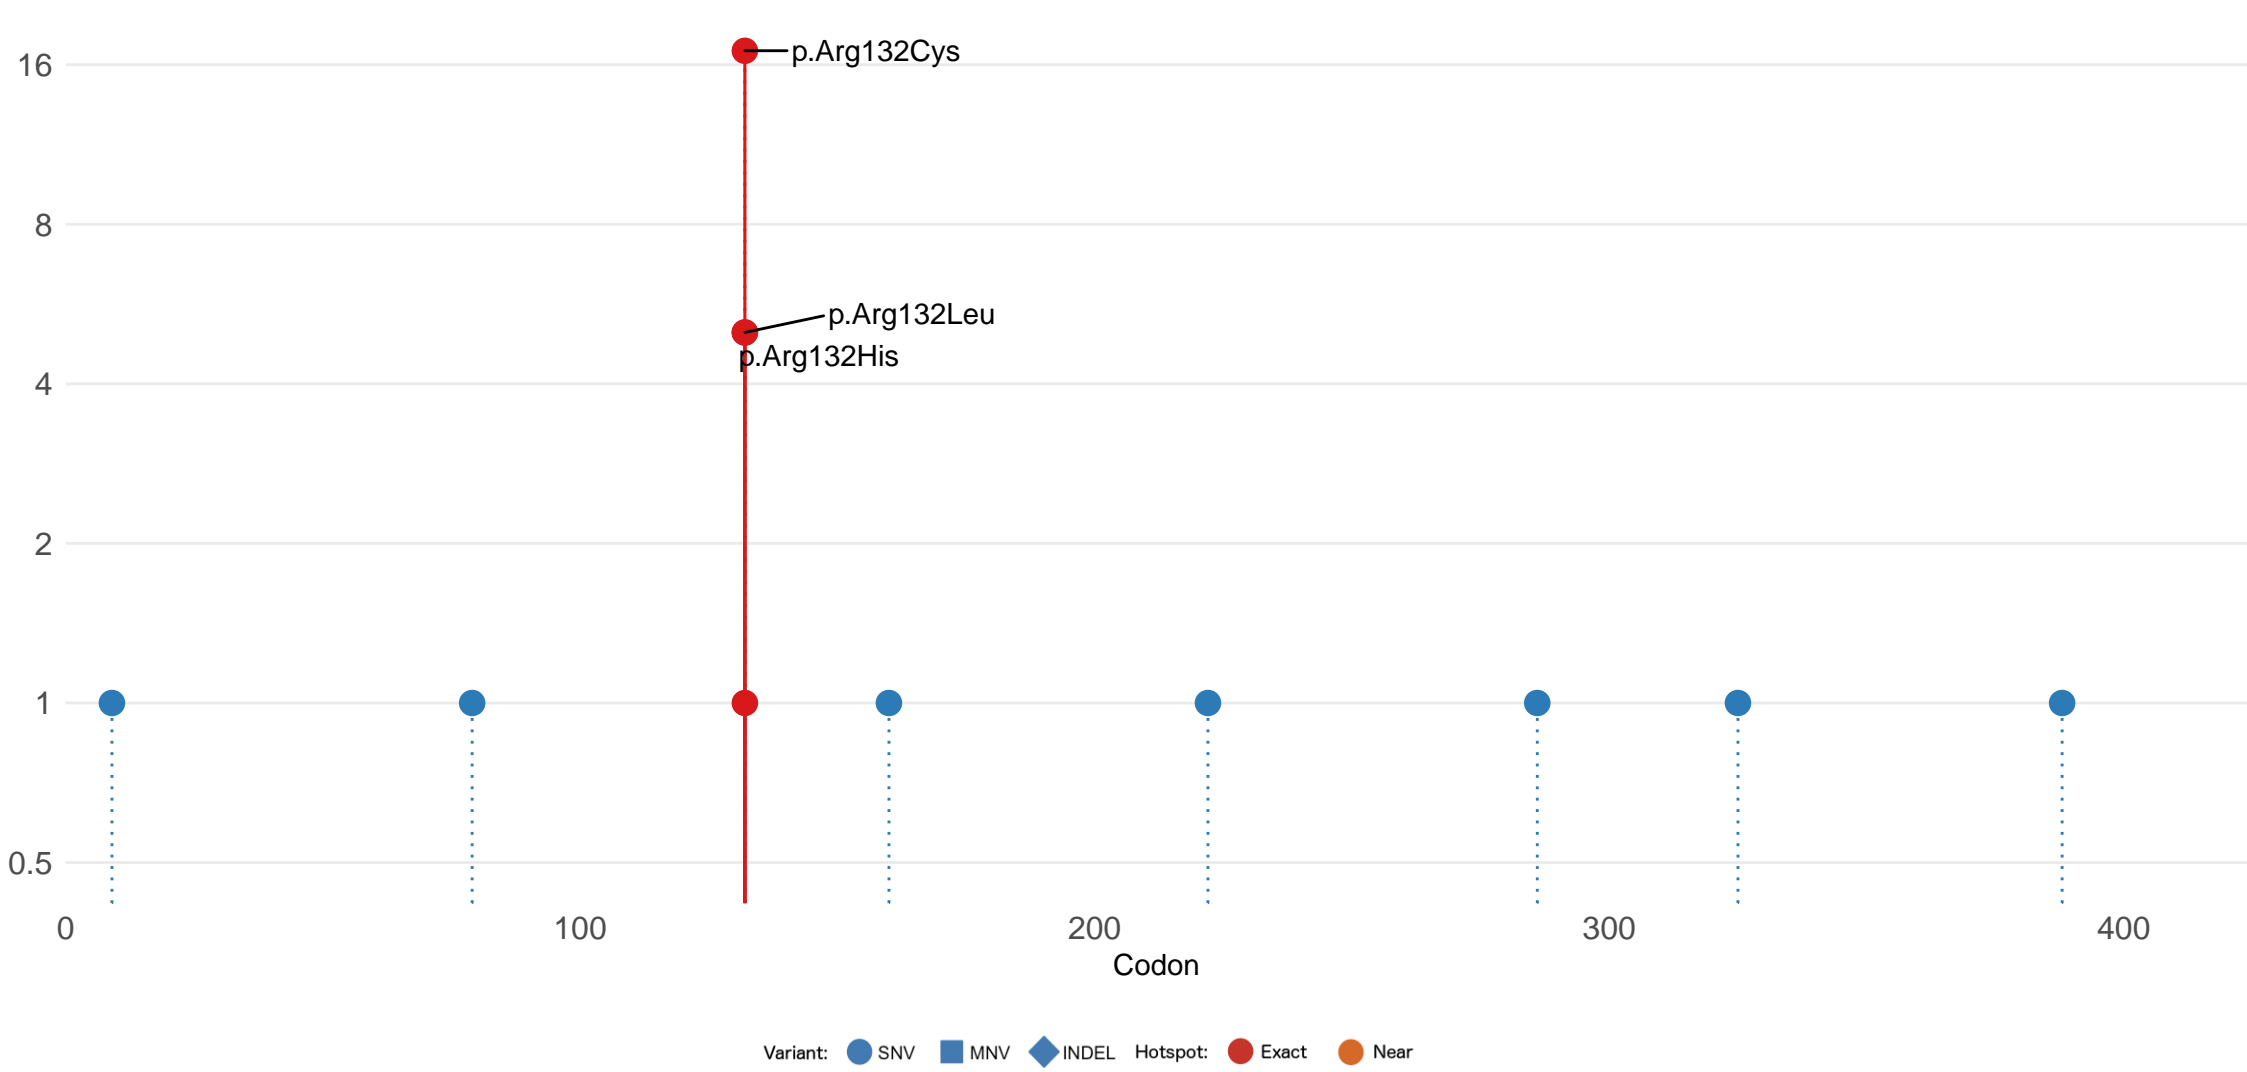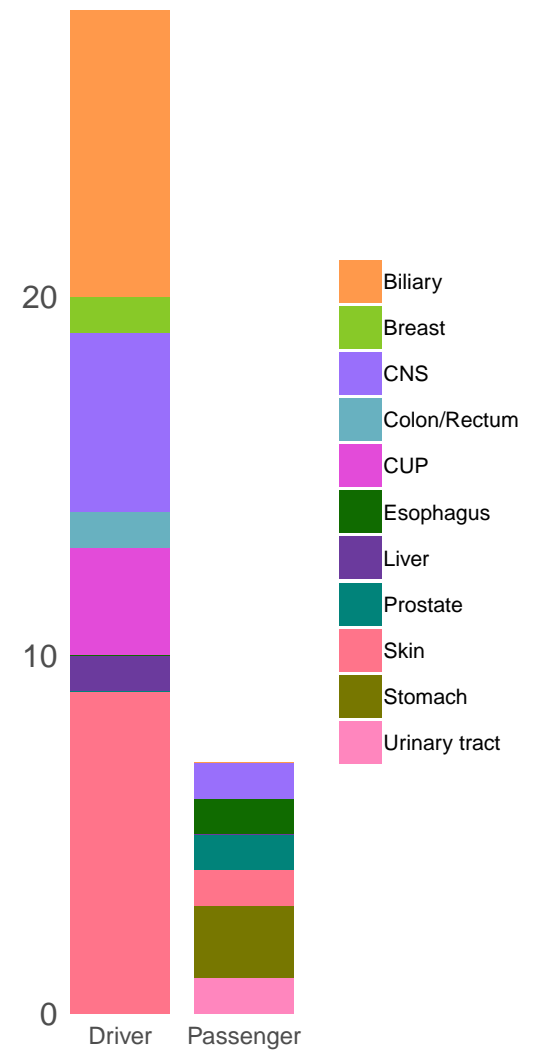



# IDH2 Variants

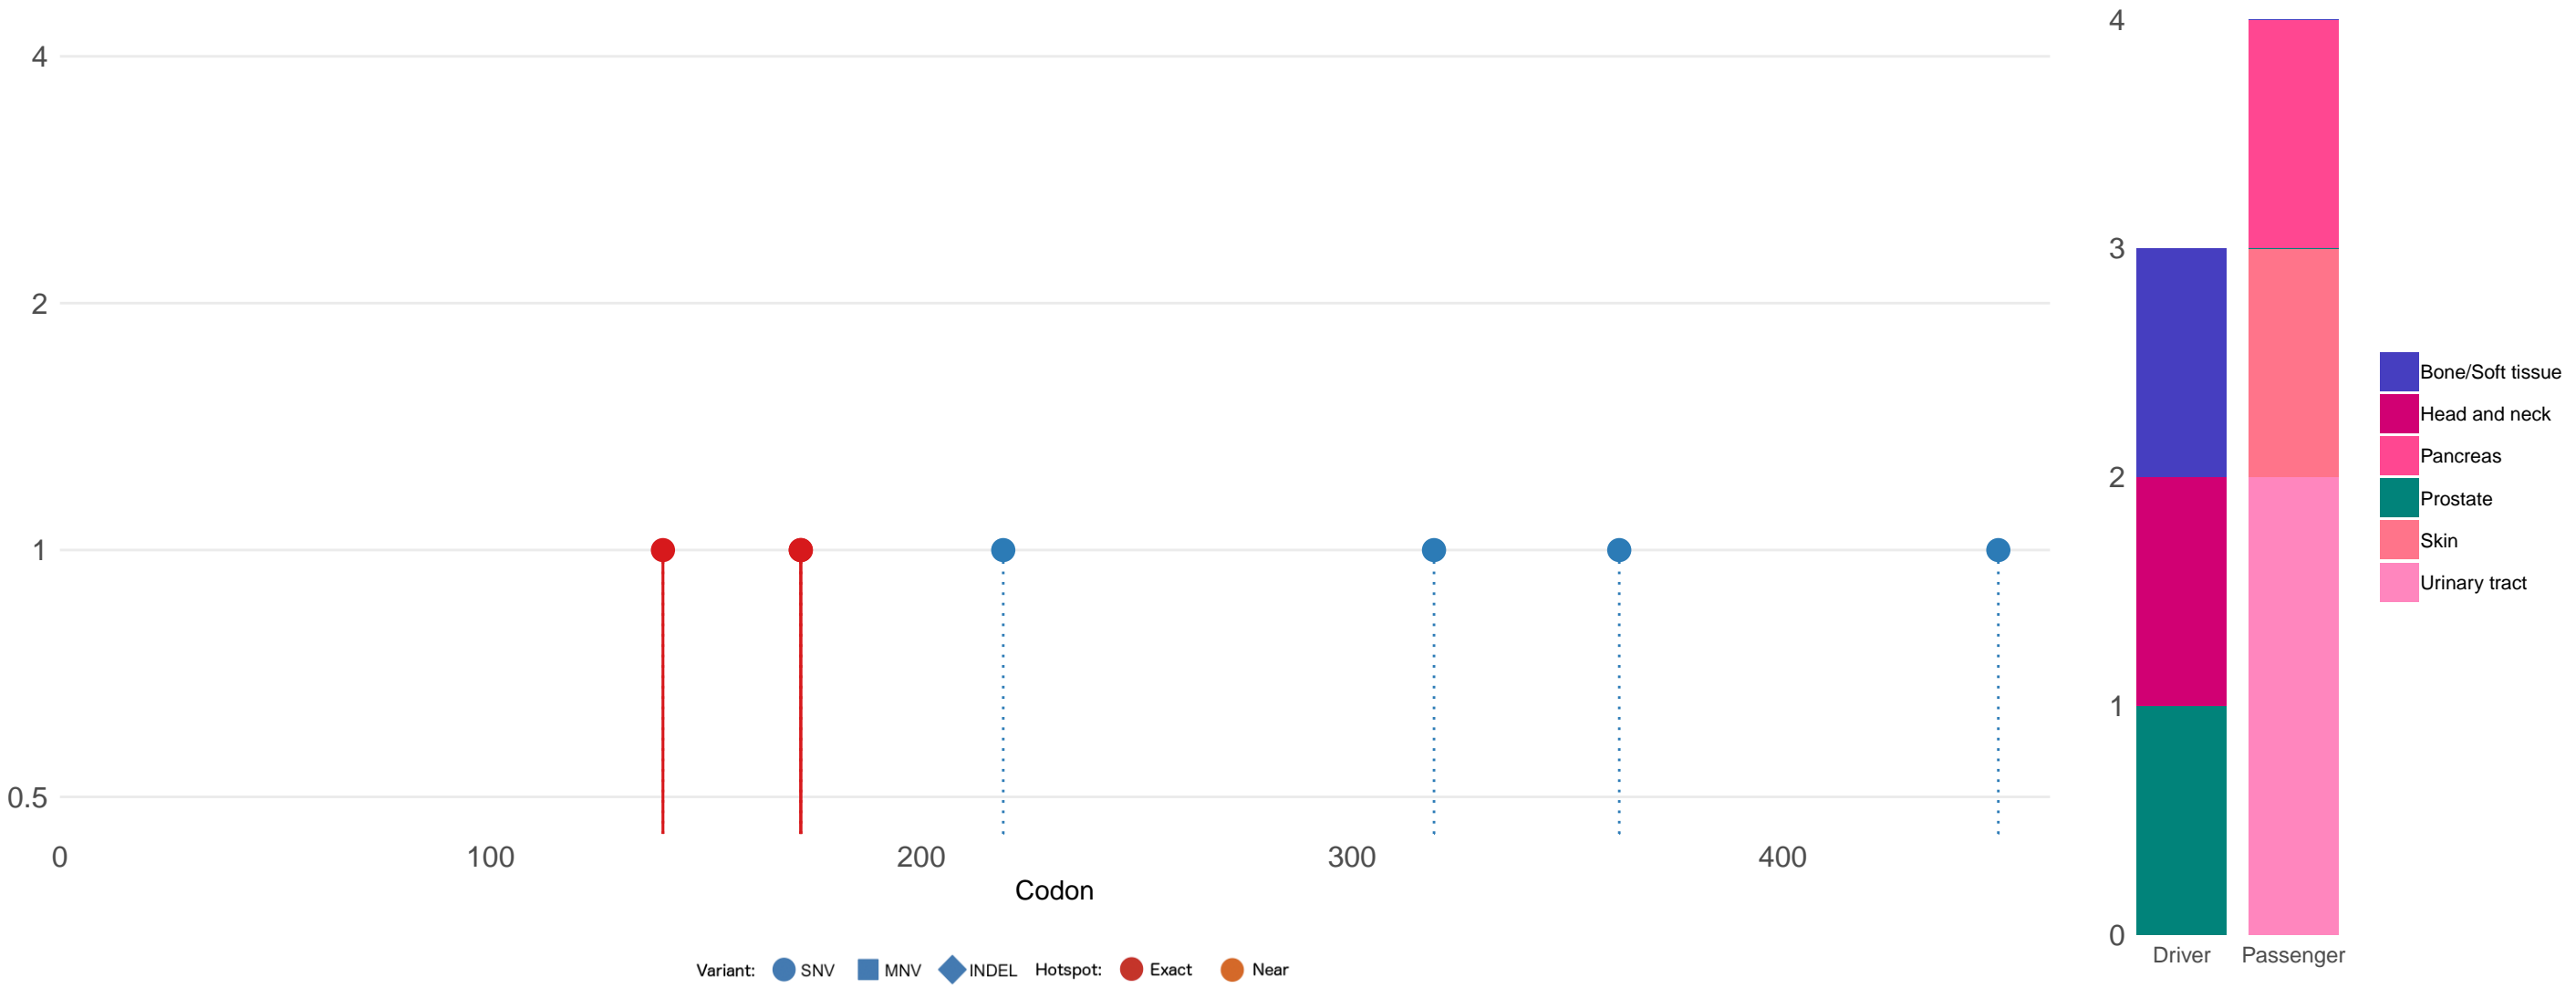

# IKBKB Variants

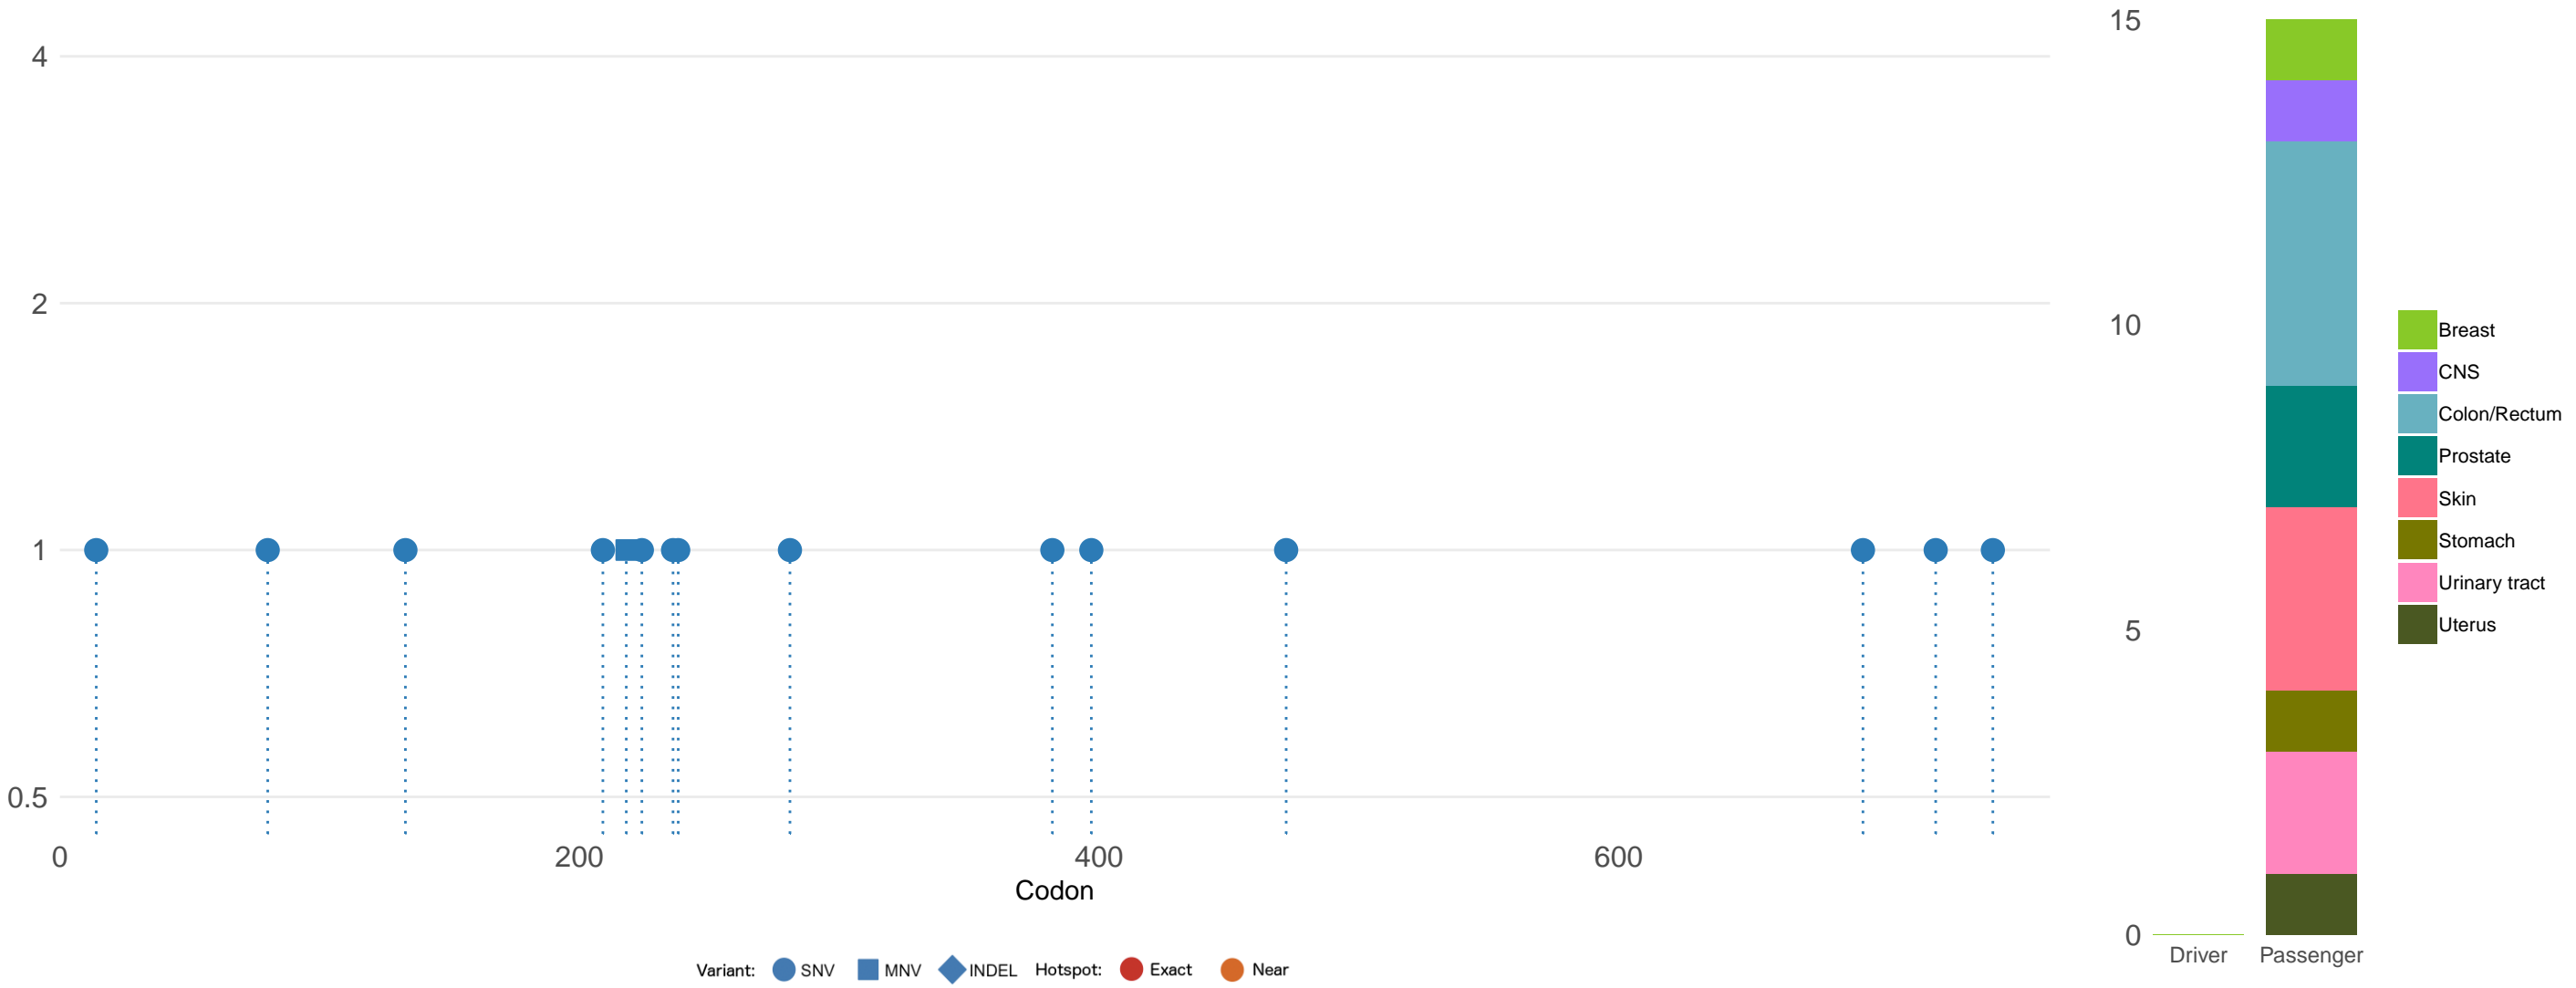

# IL6ST Variants

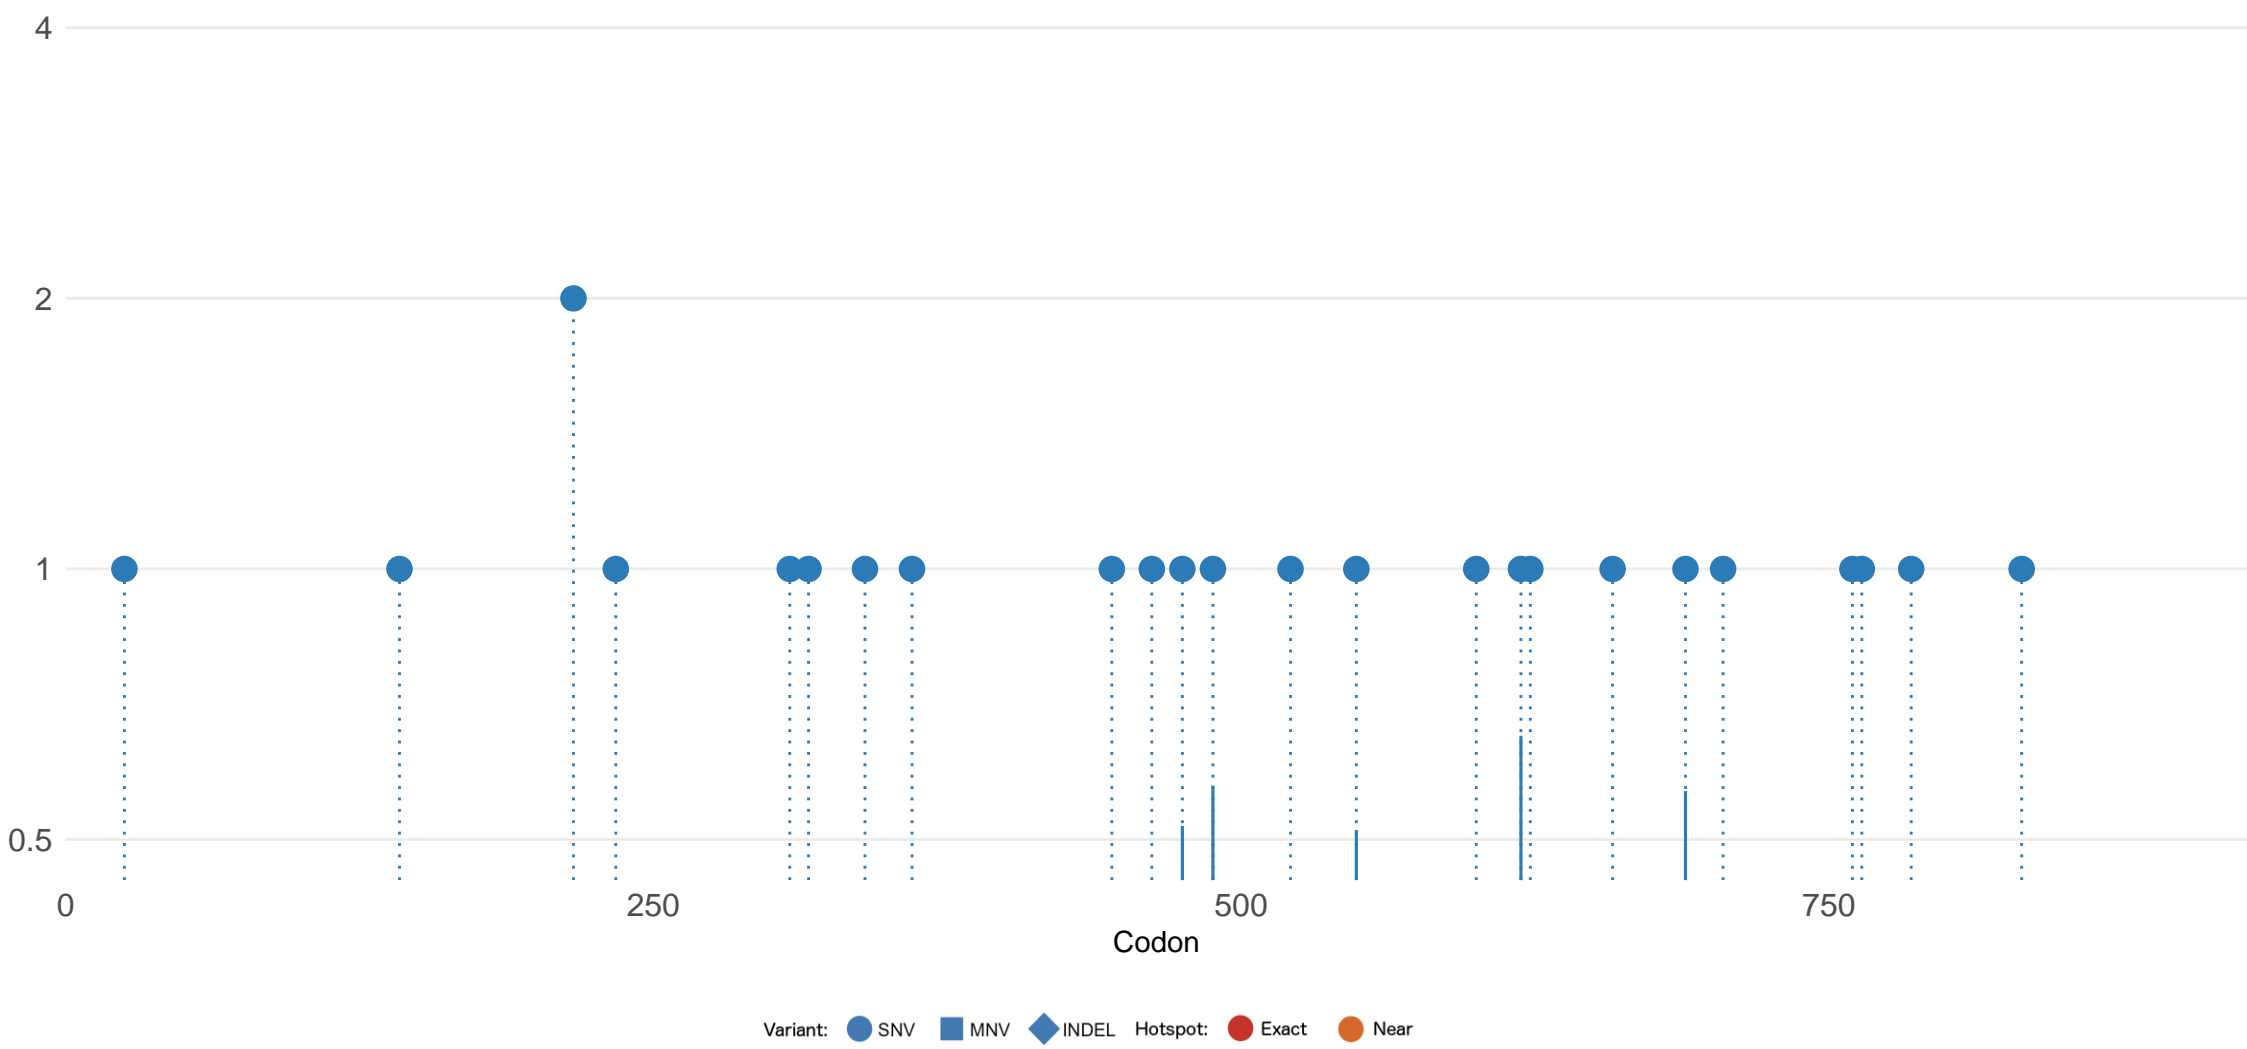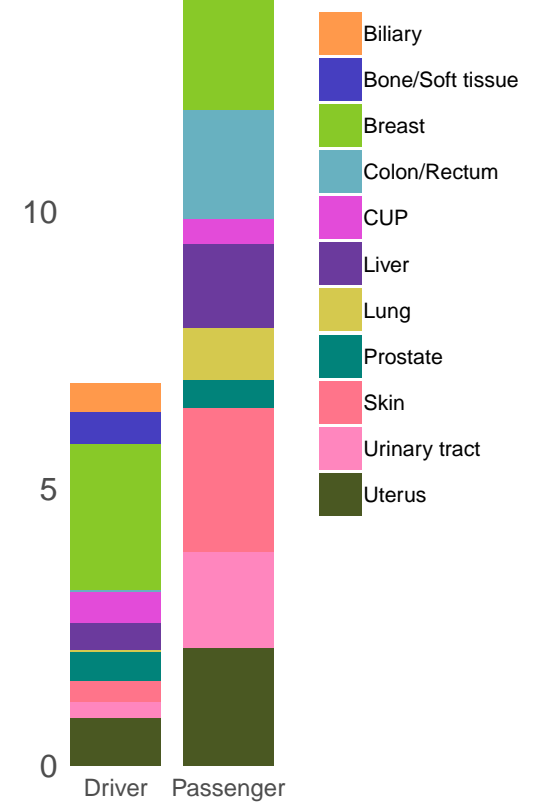

# IL7R Variants

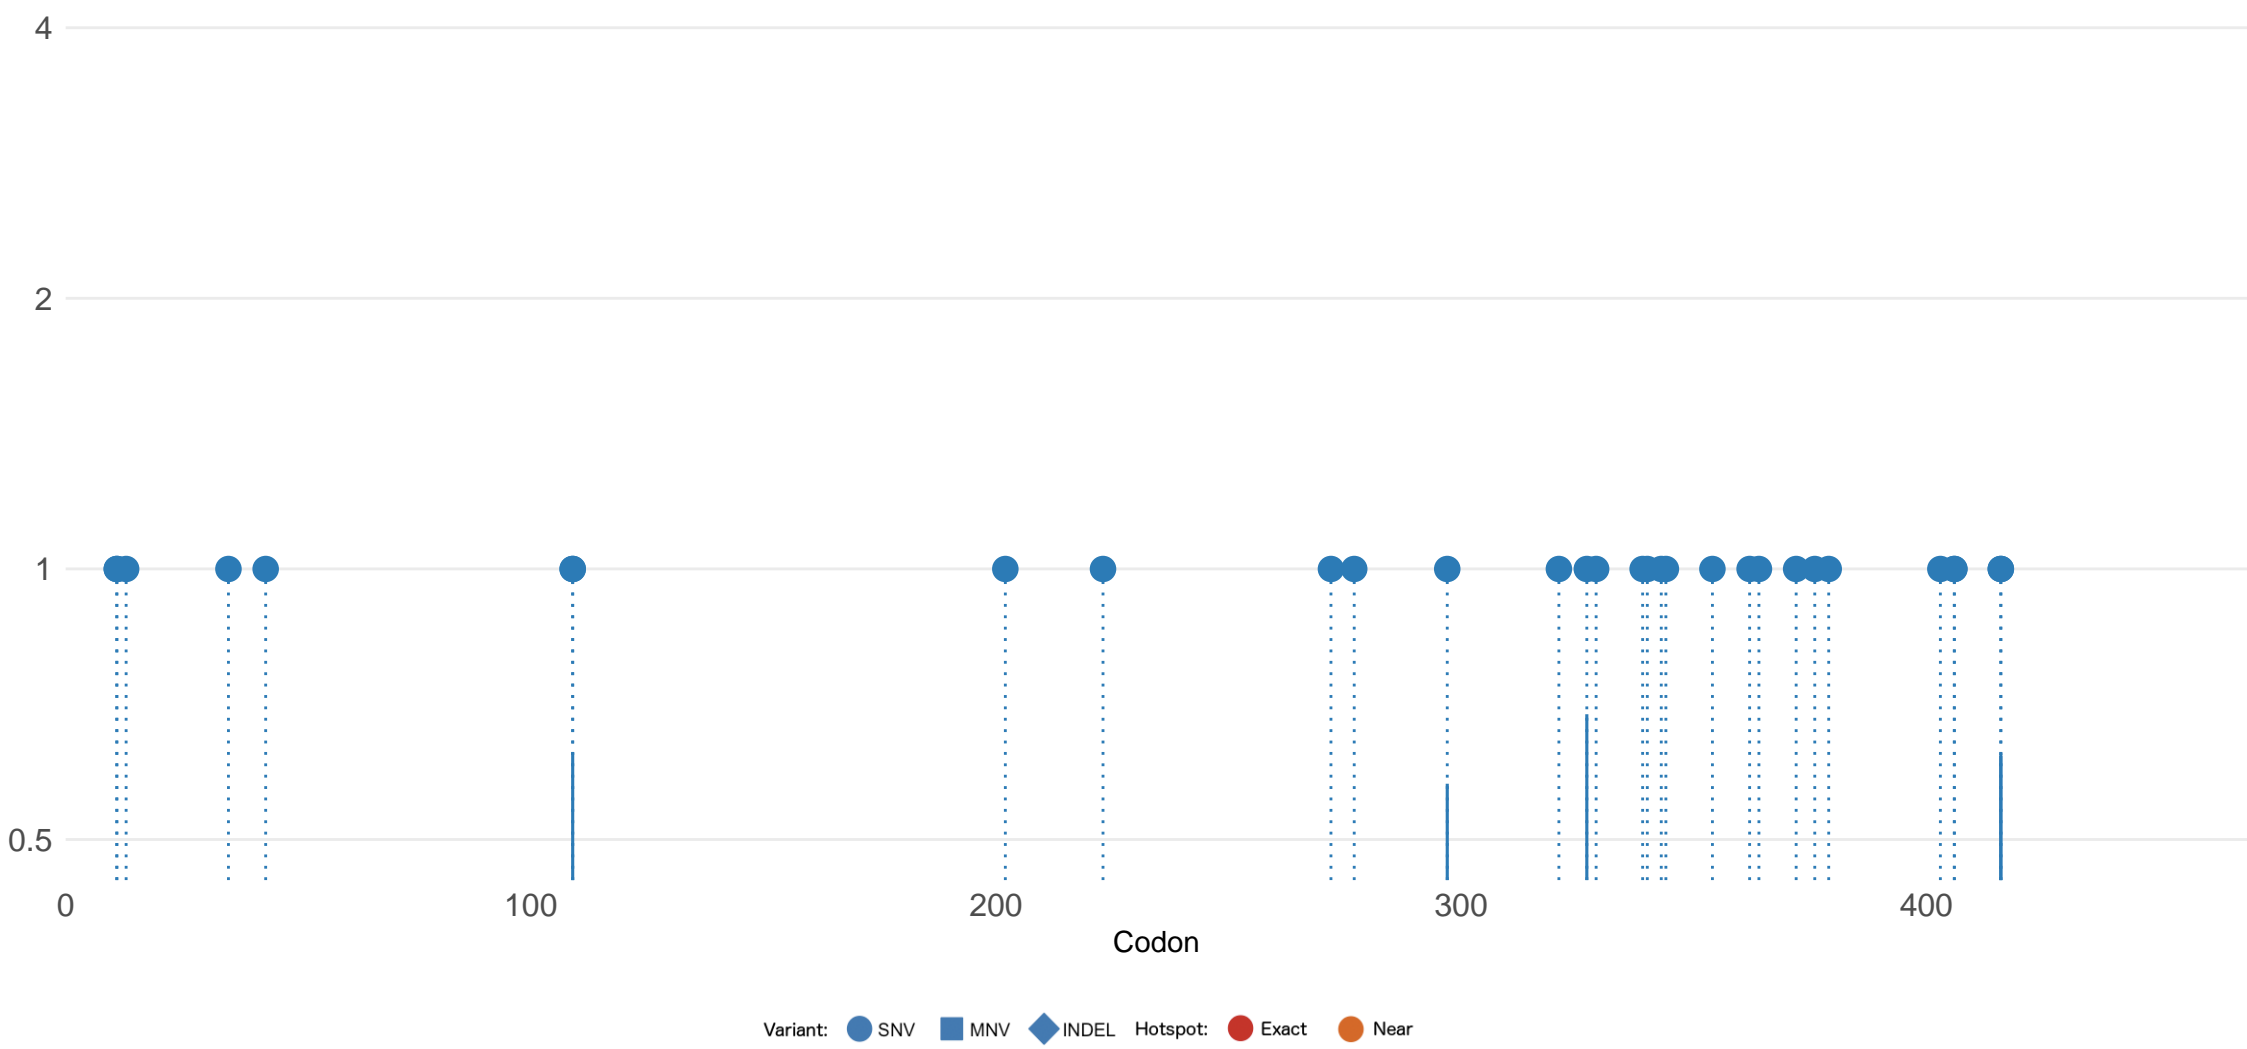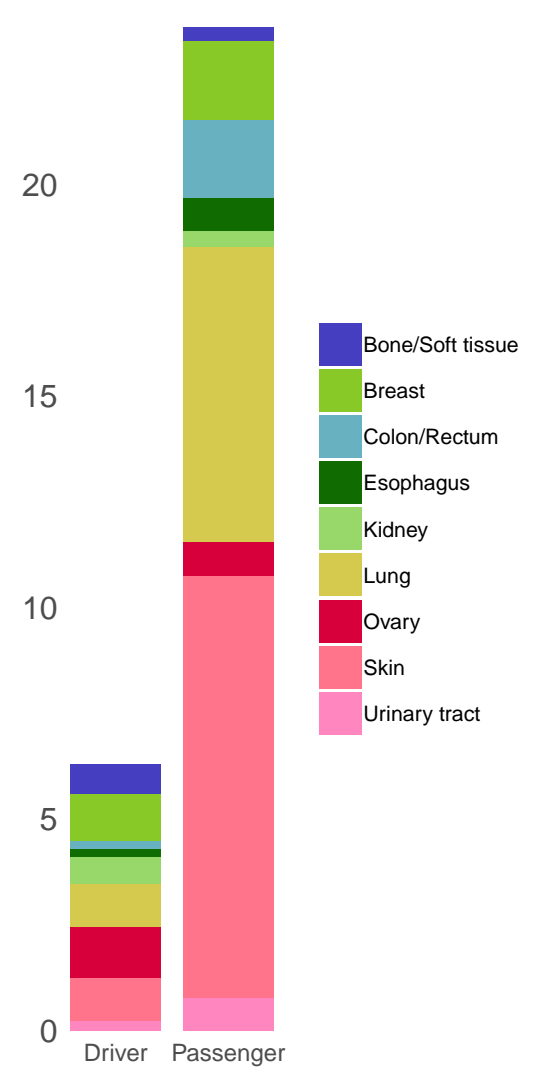

# JAK2 Variants

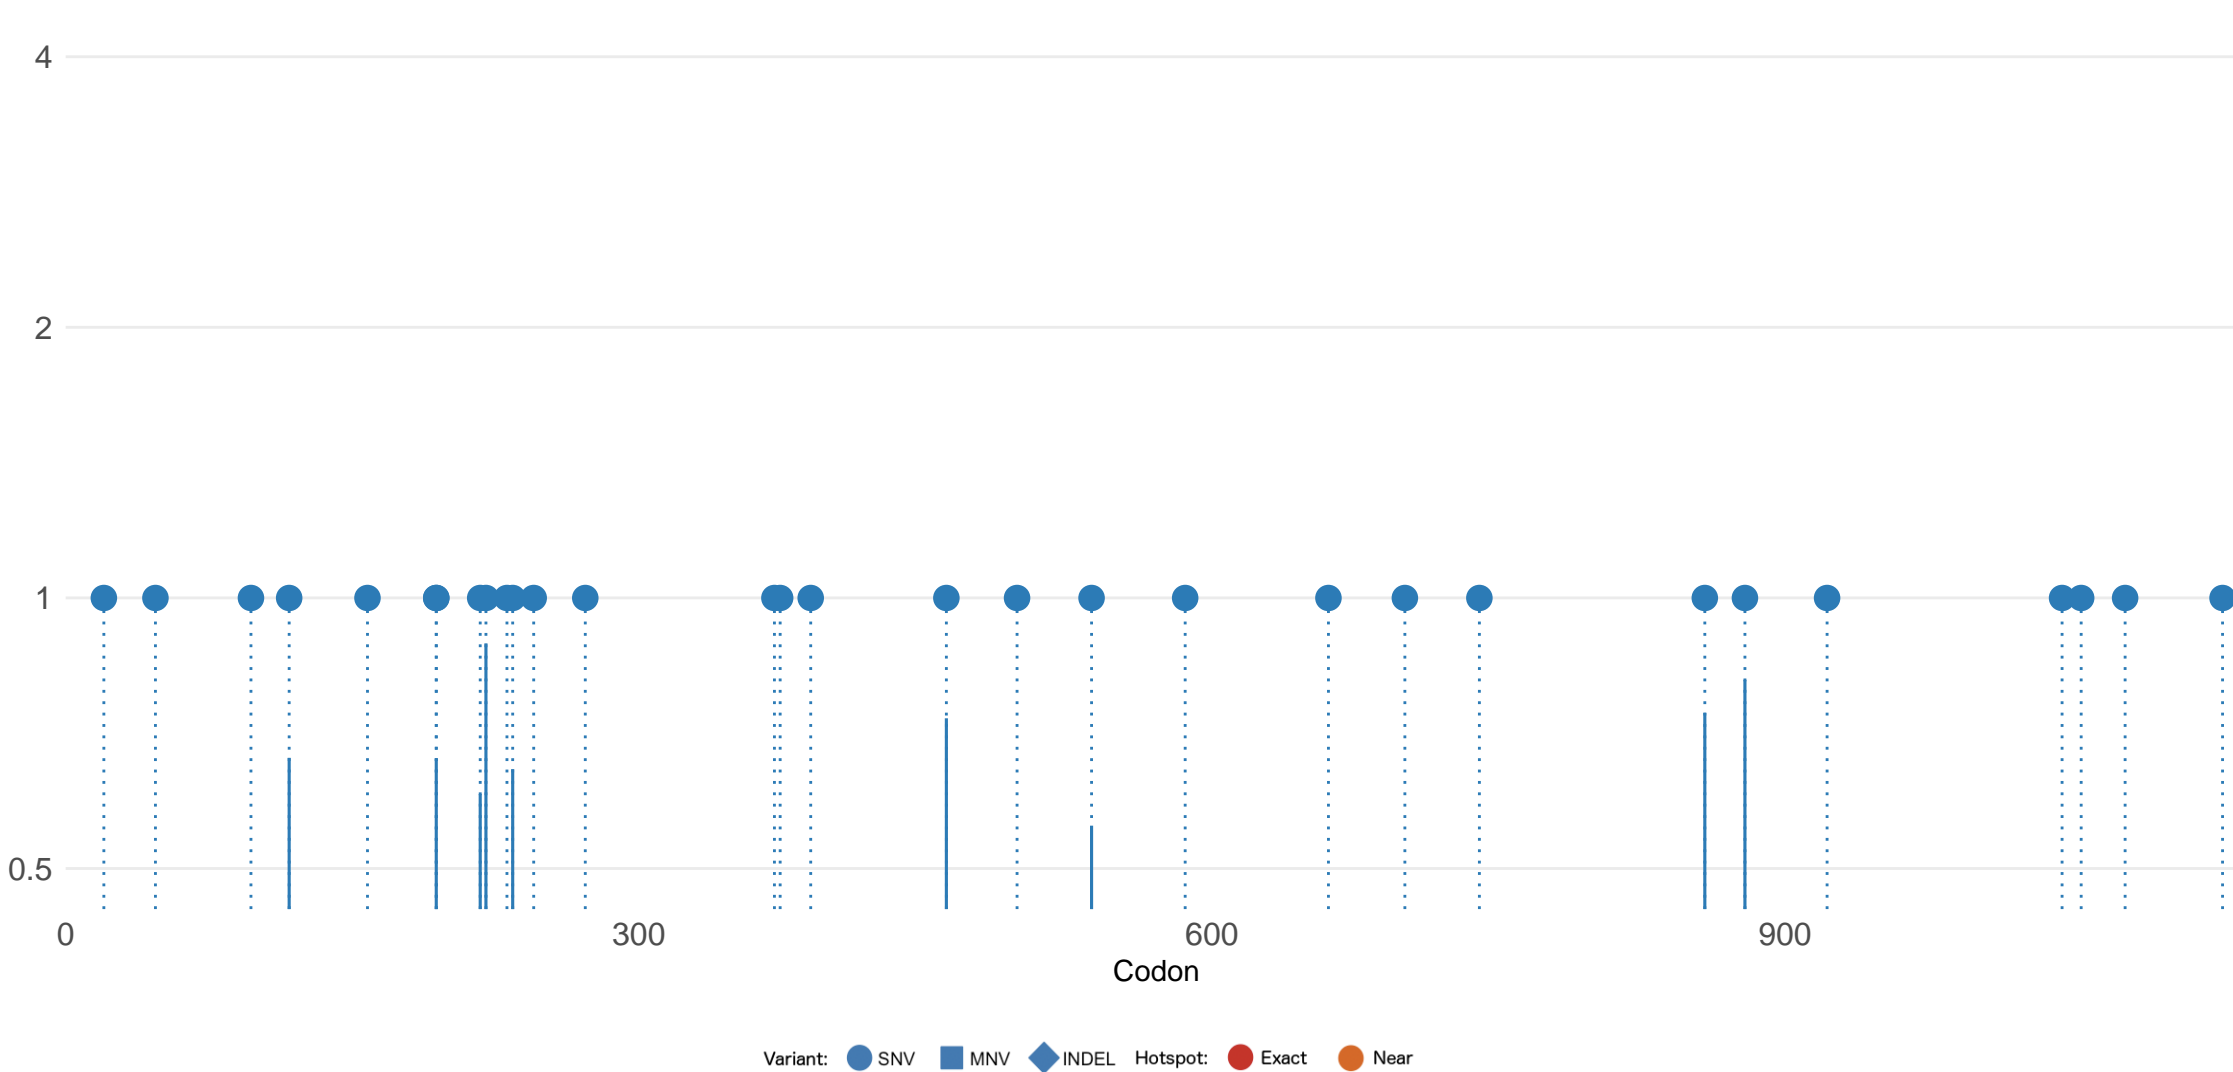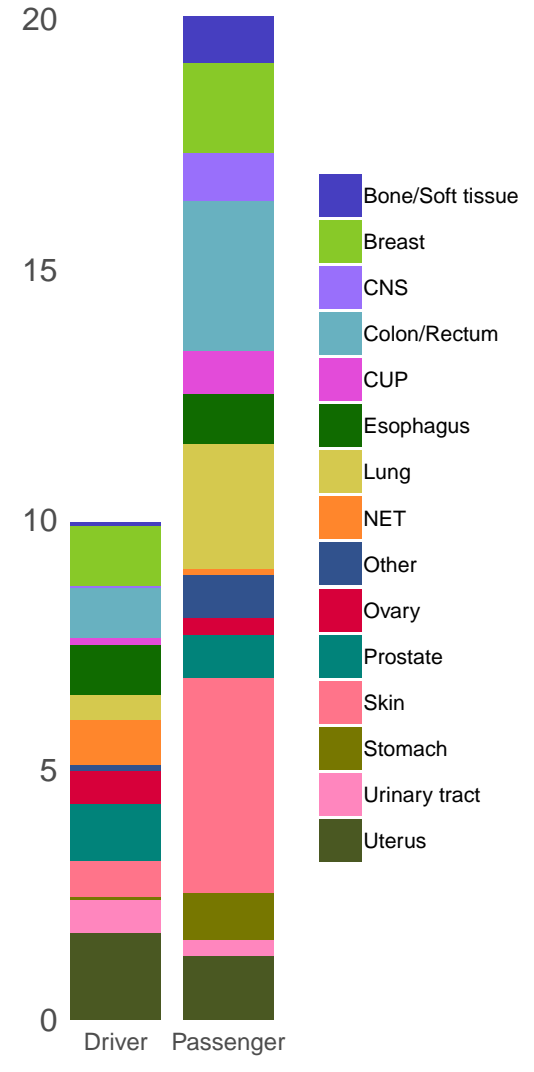

# JAK3 Variants

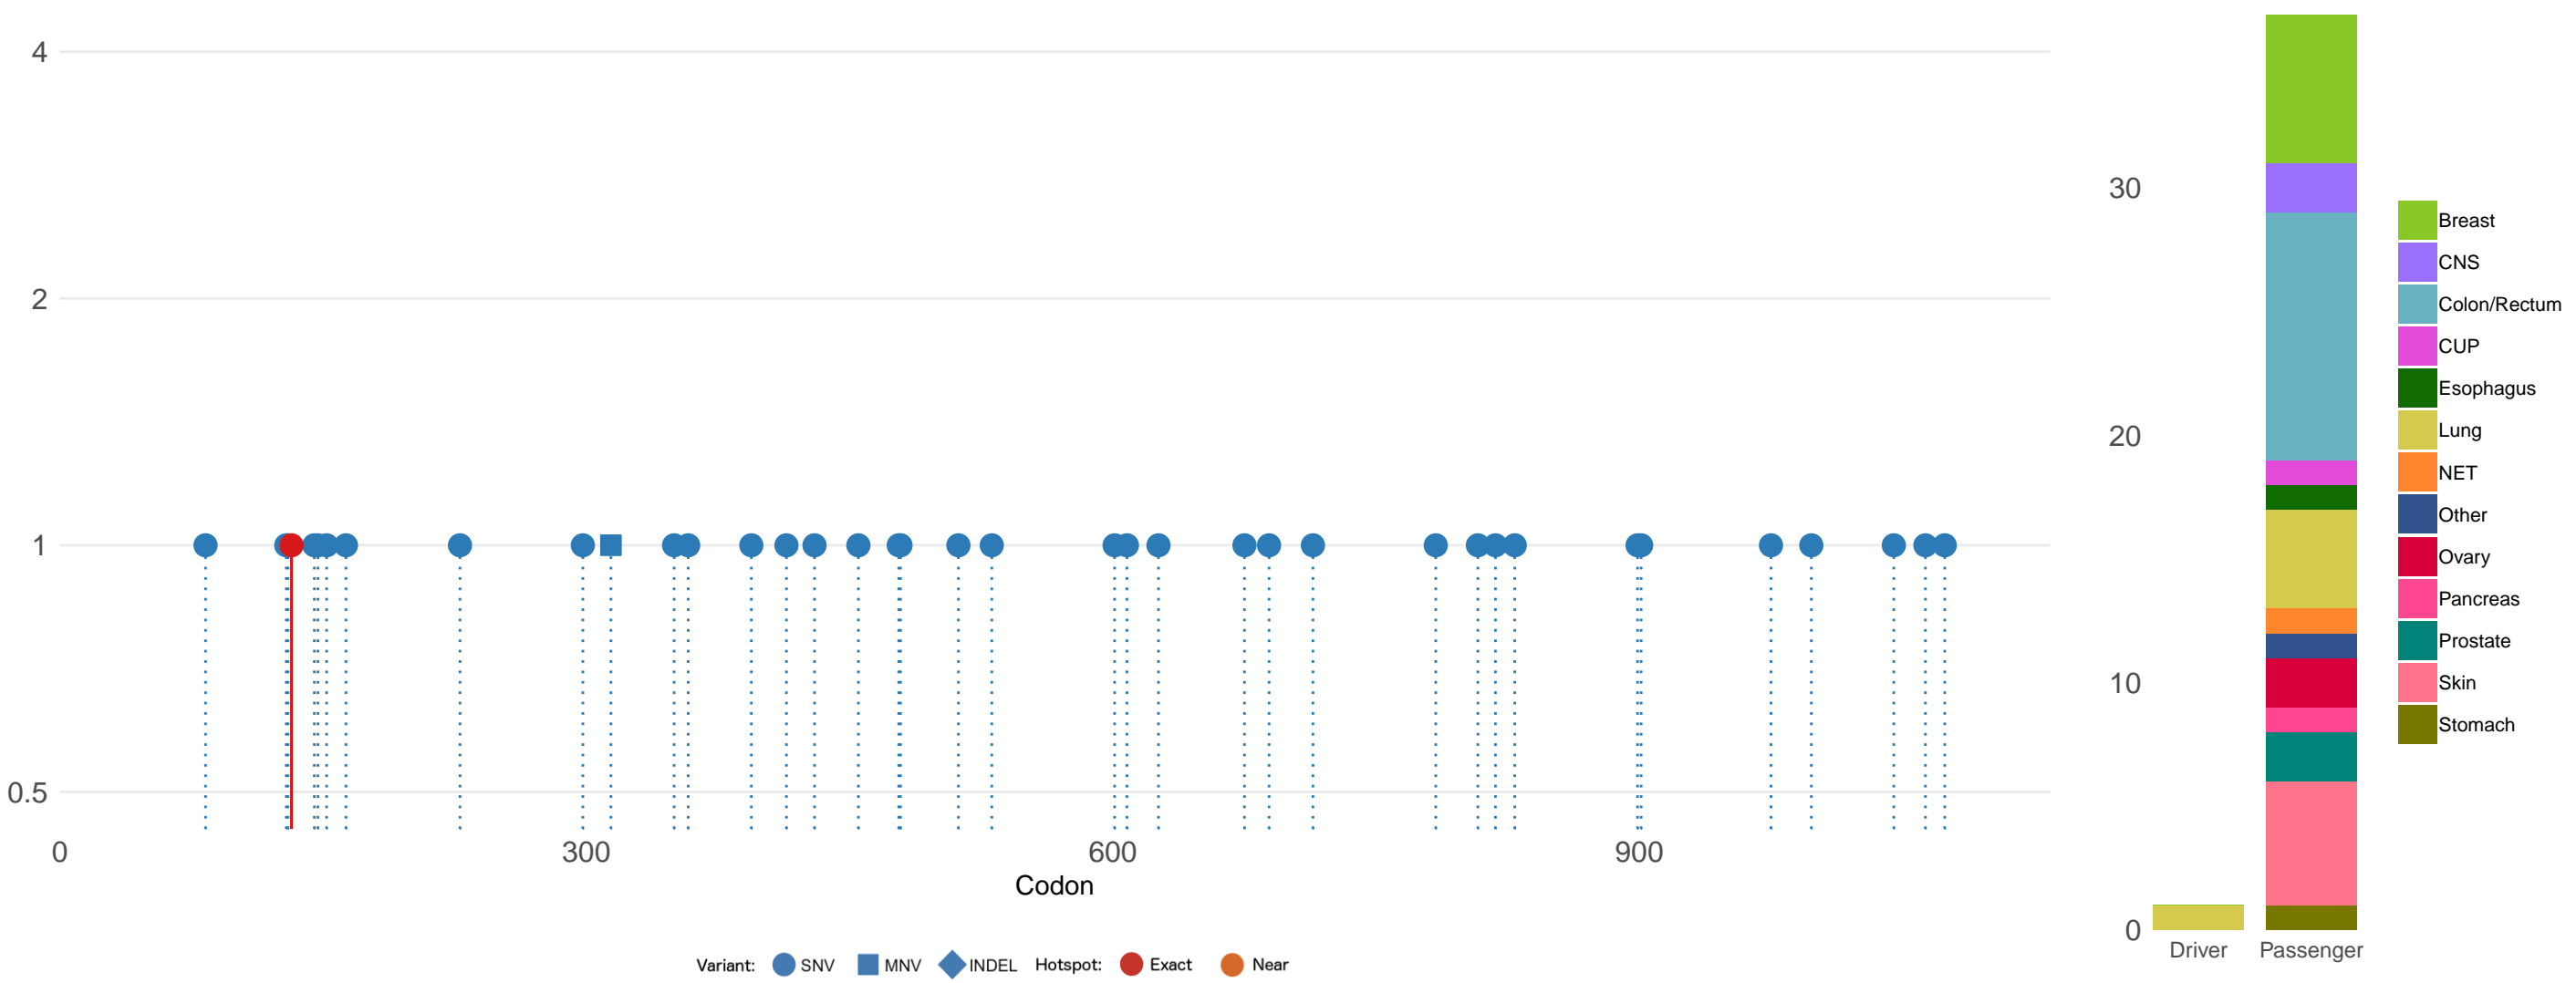

# KCNJ5 Variants

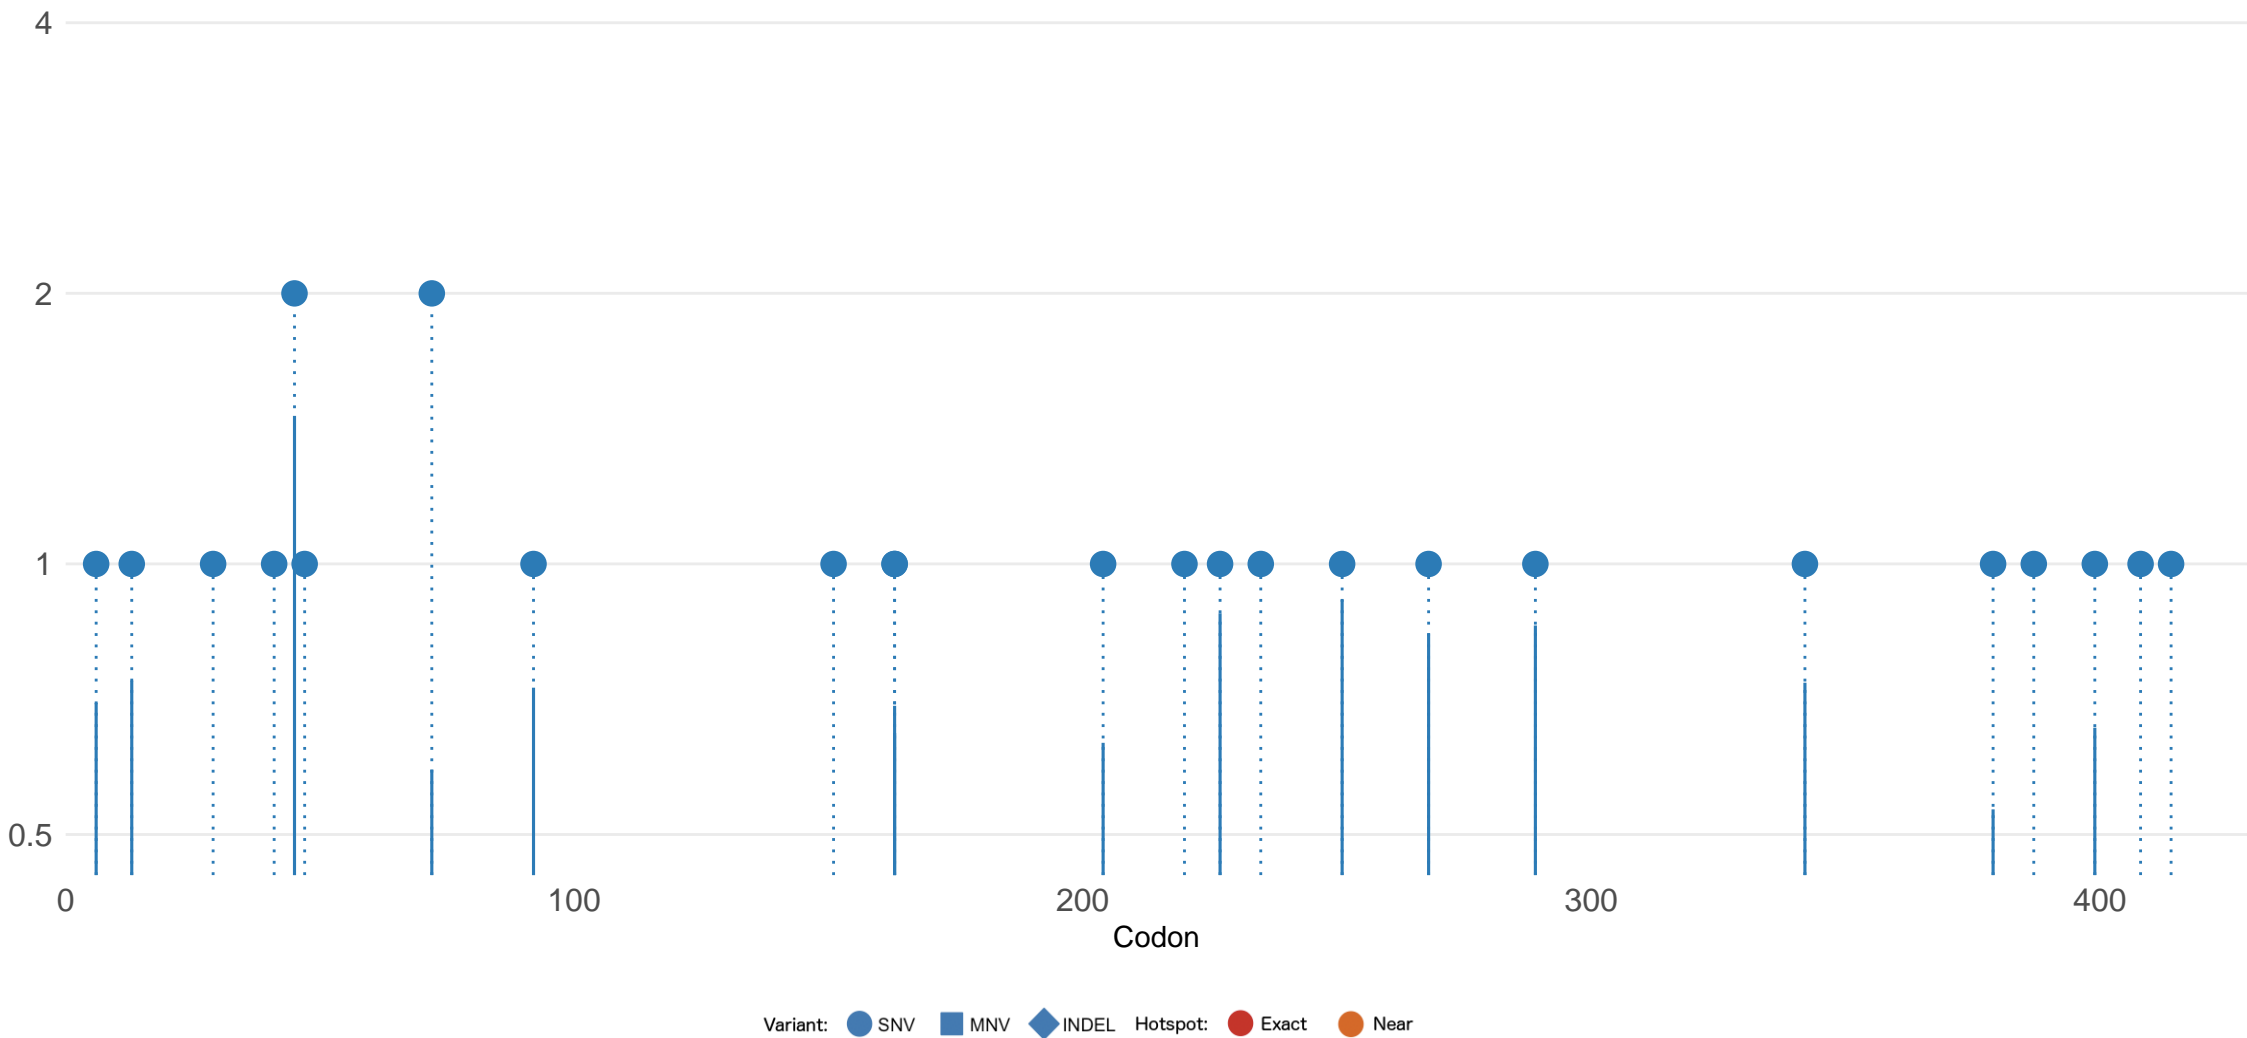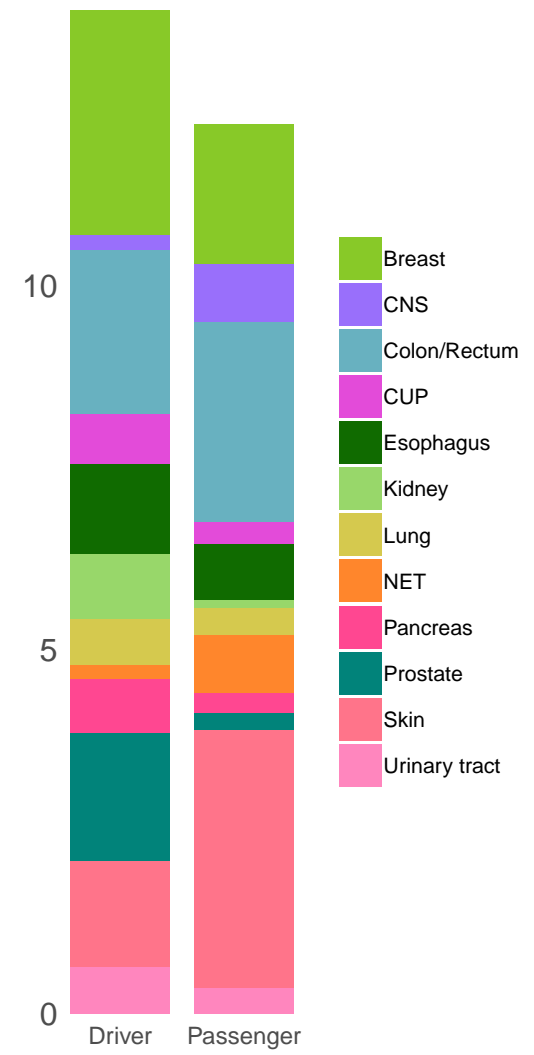

# KDR Variants

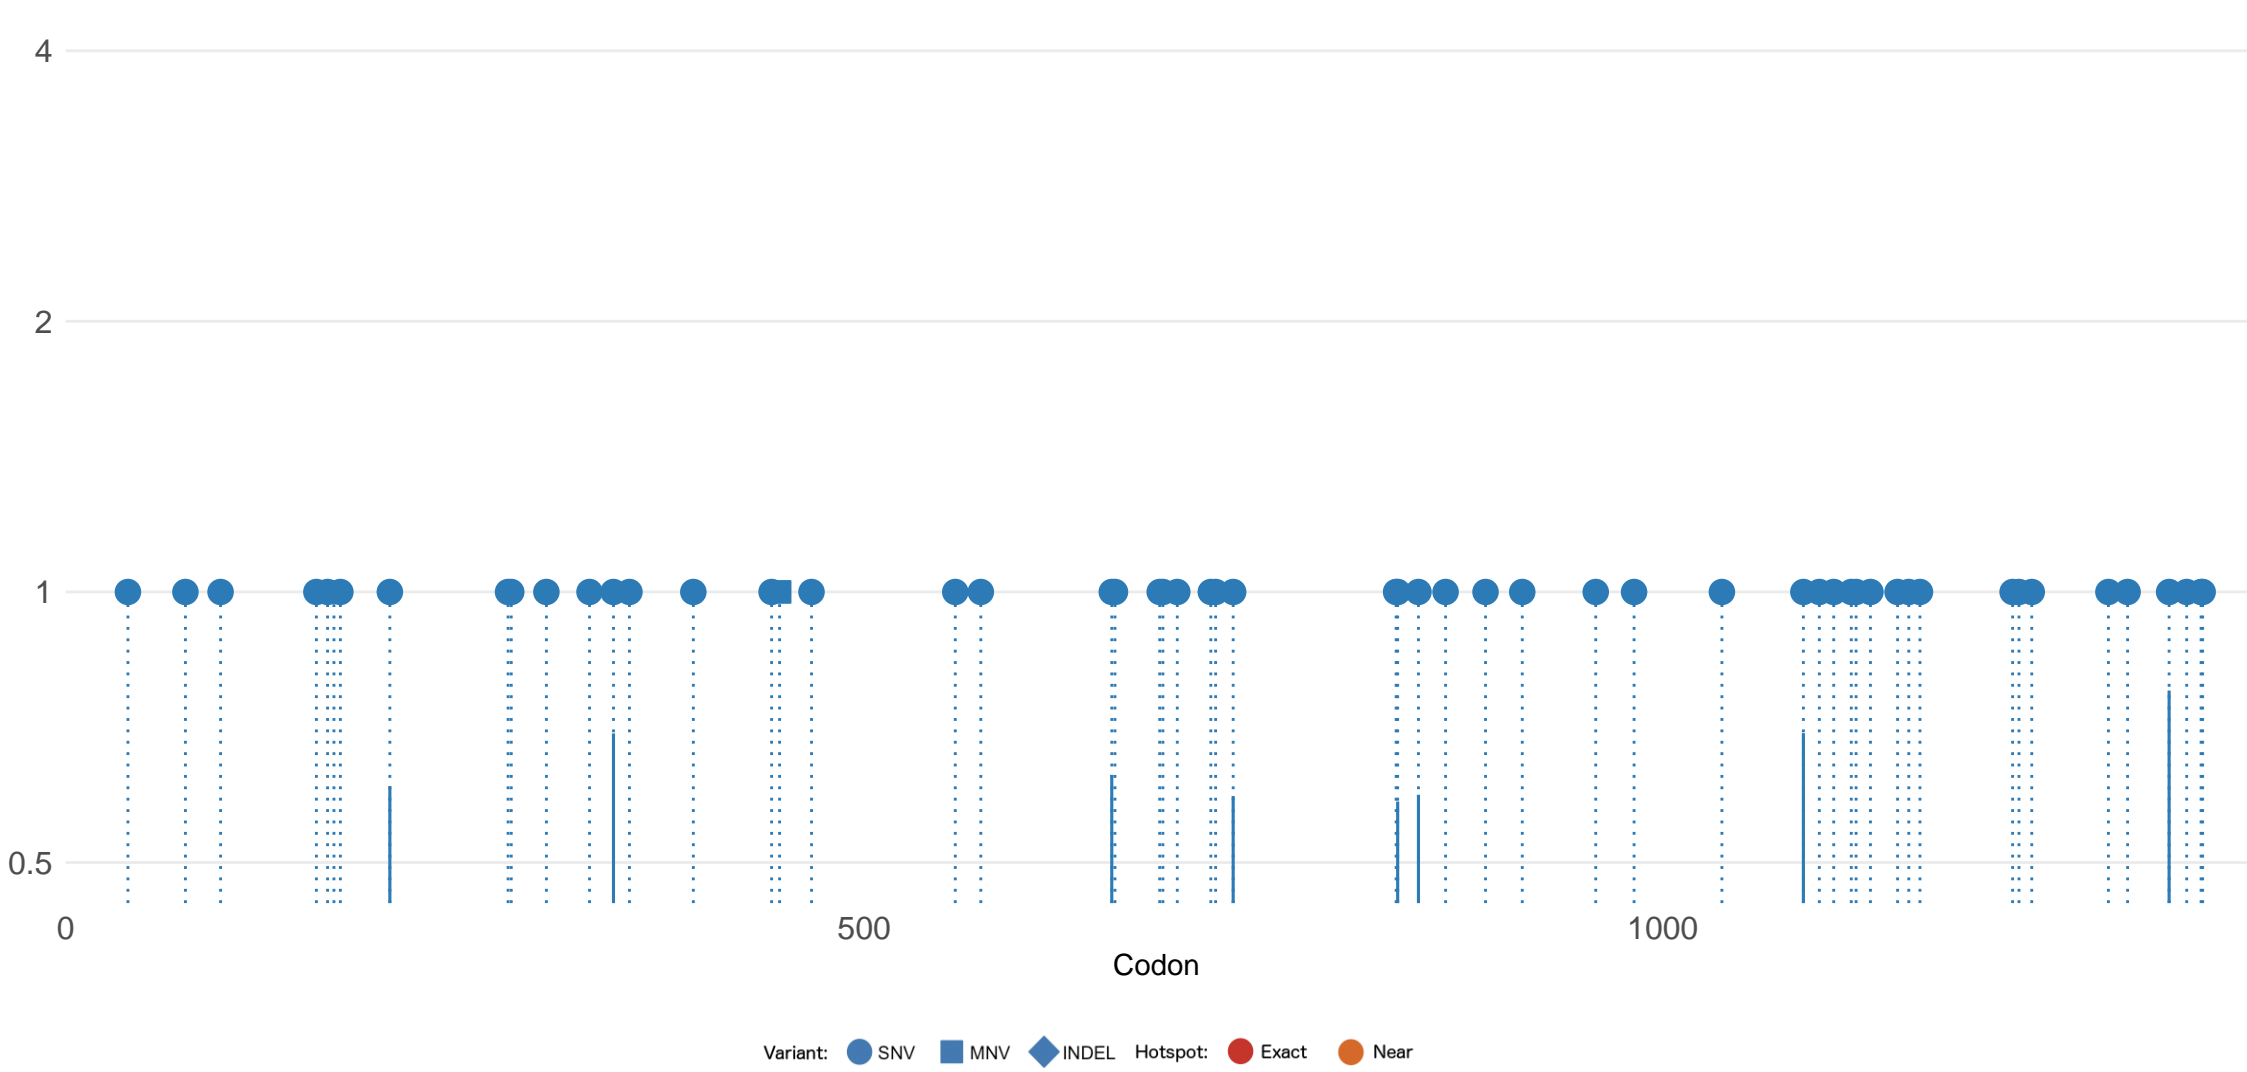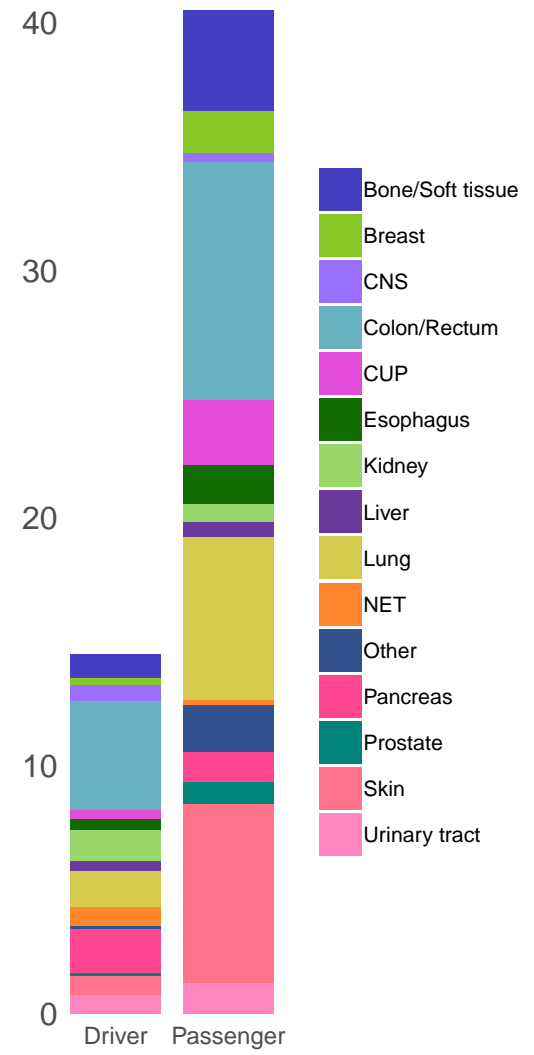



# KIT Variants

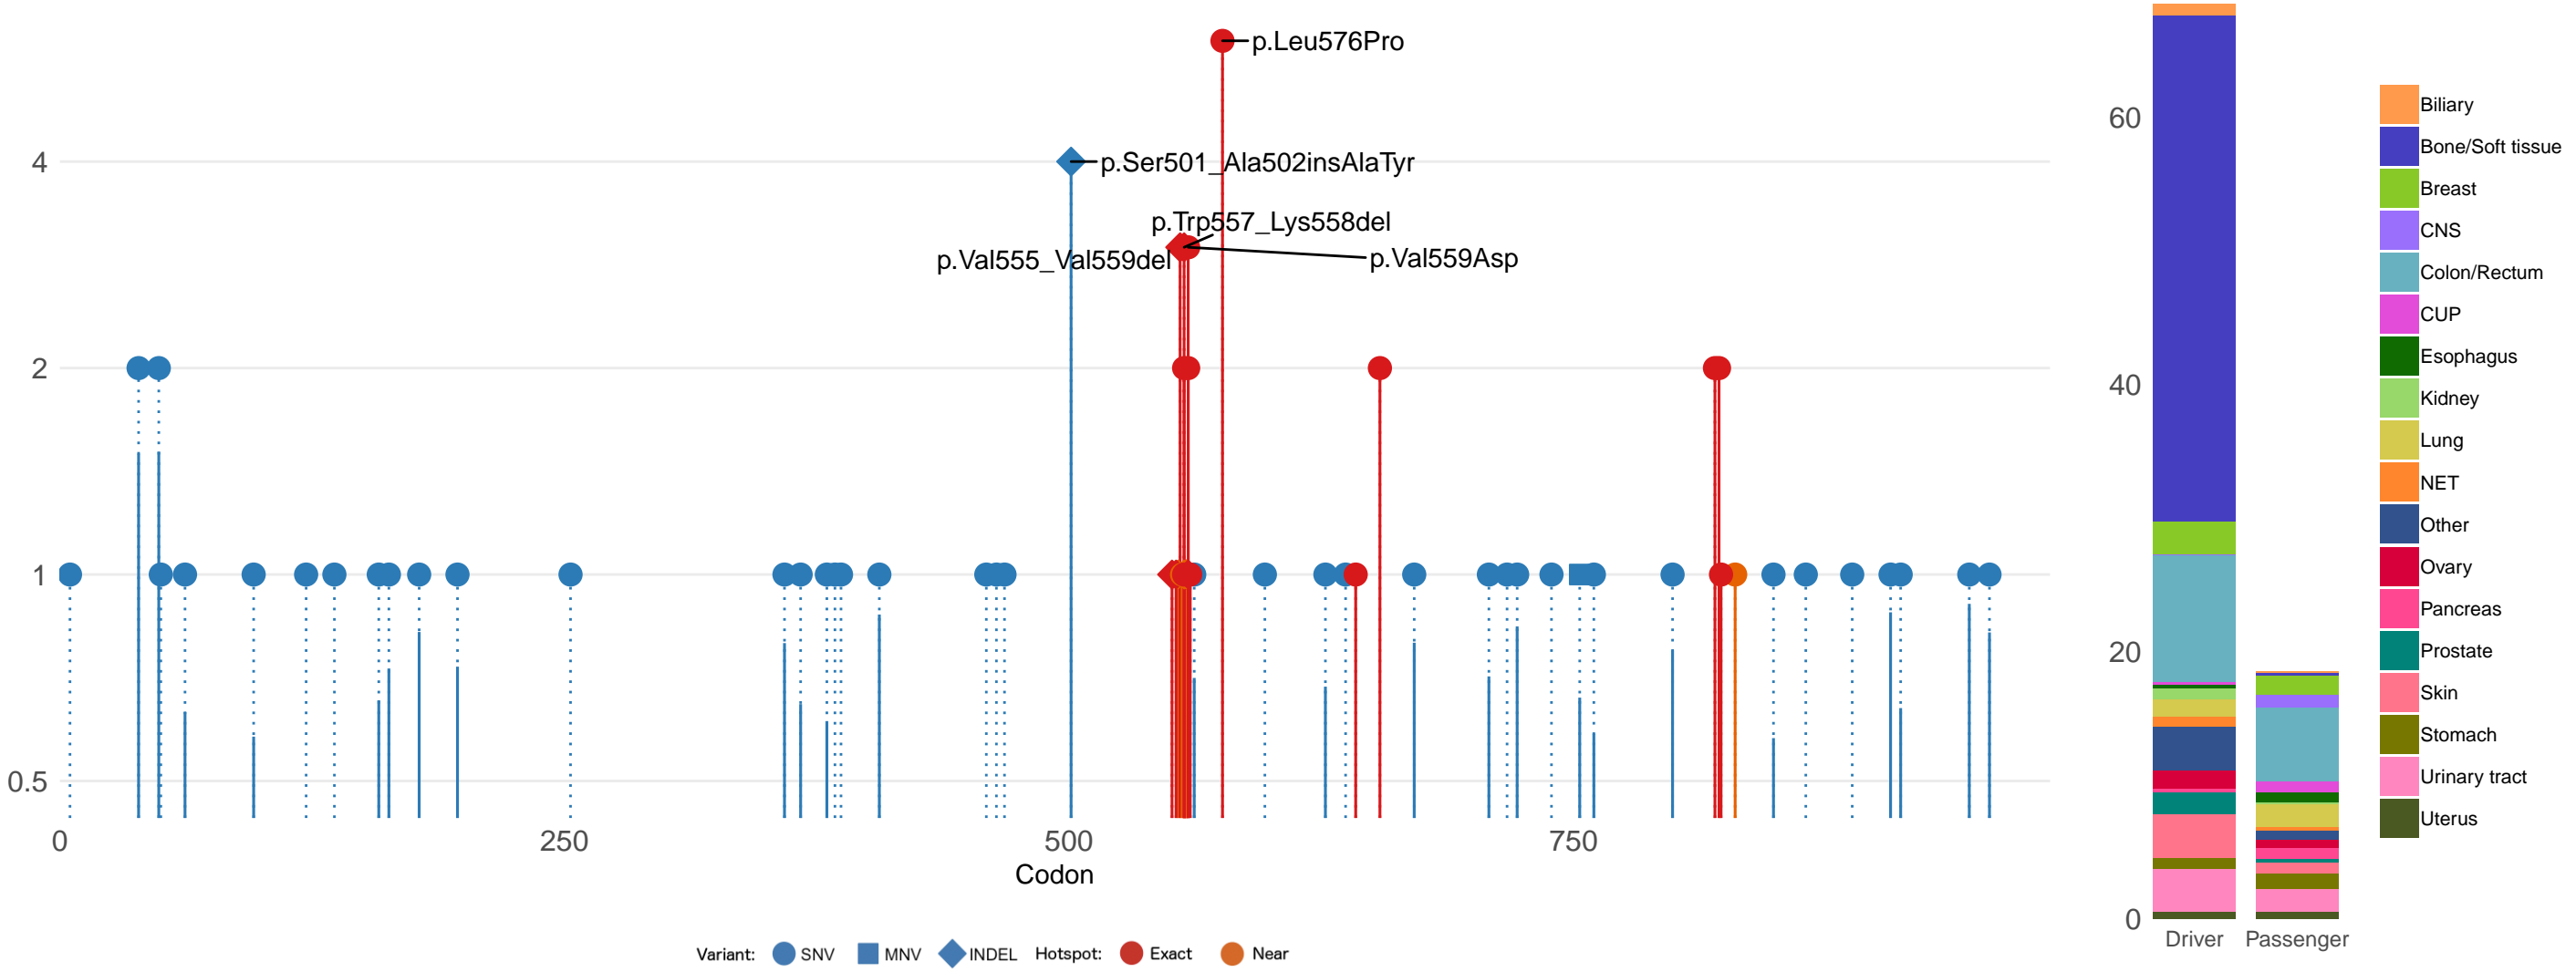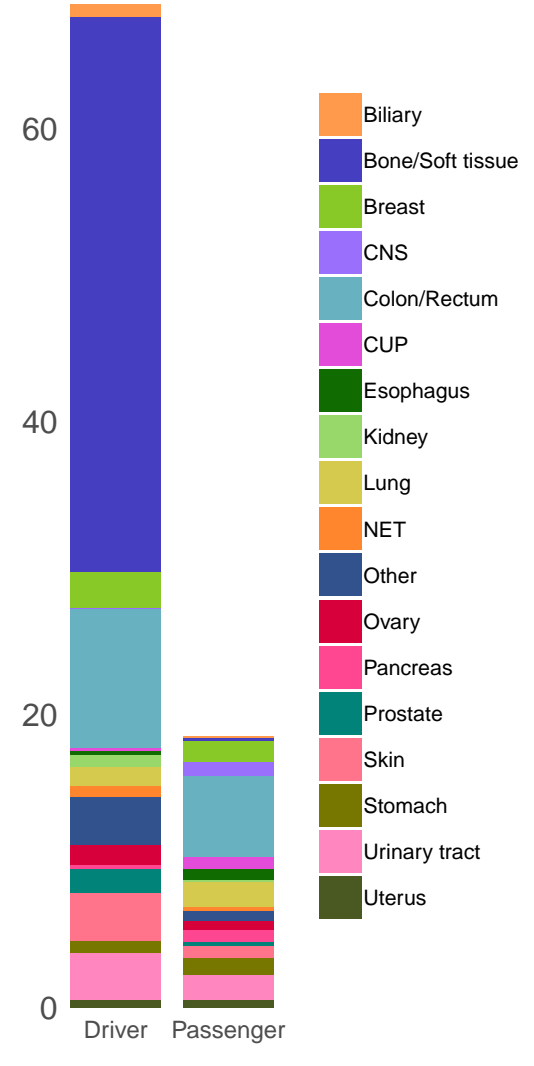



# KRAS Variants

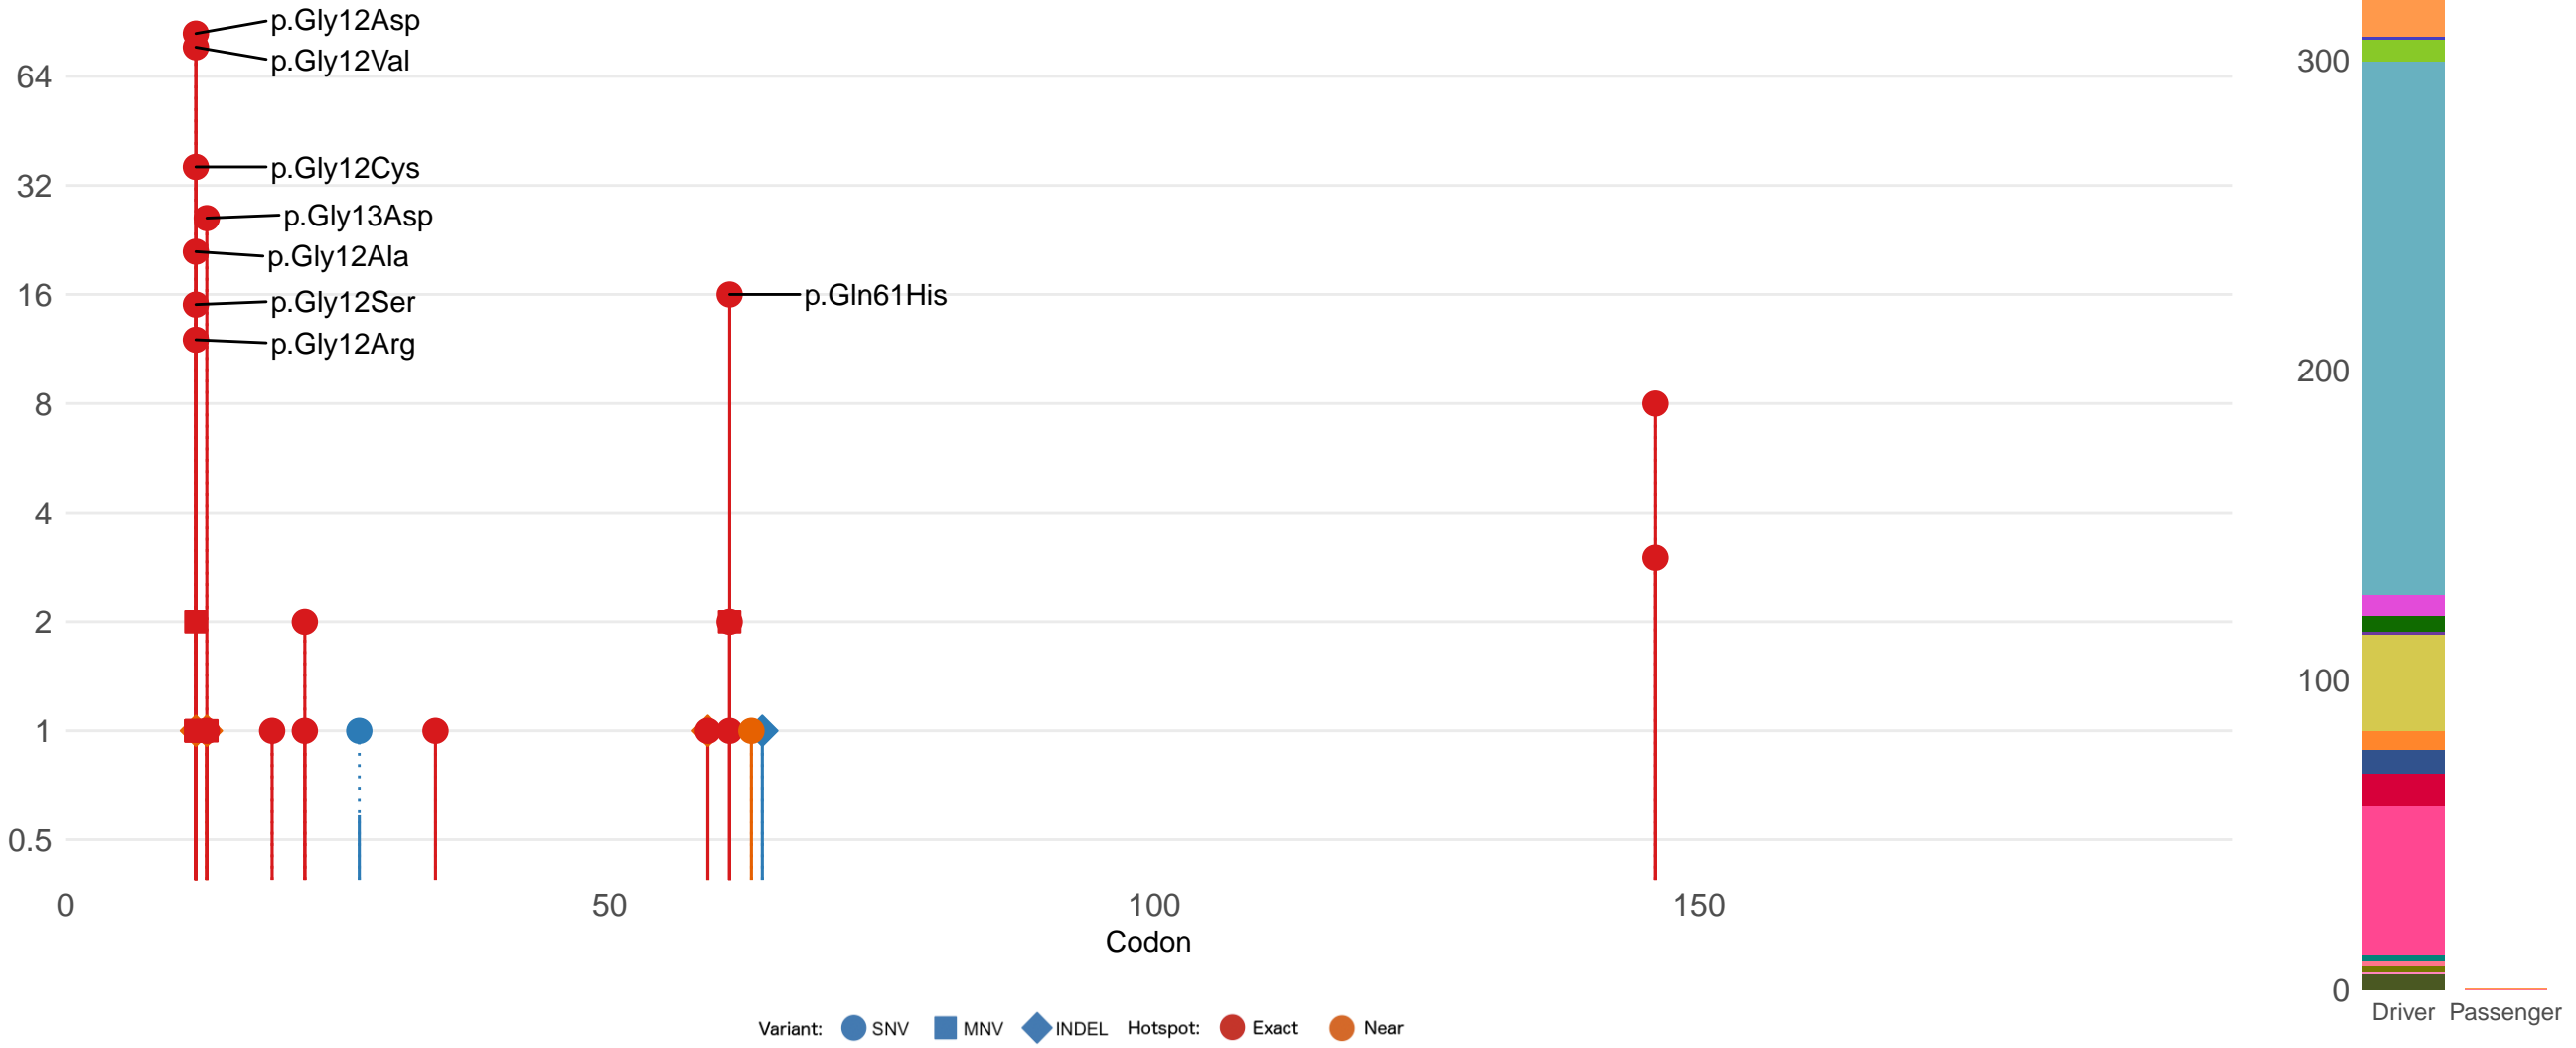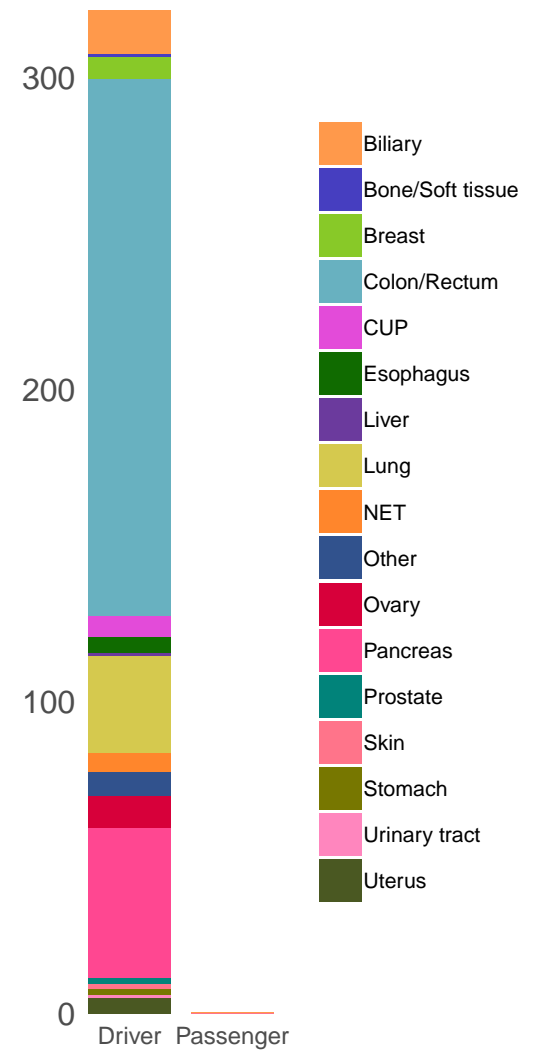

# KRT5 Variants

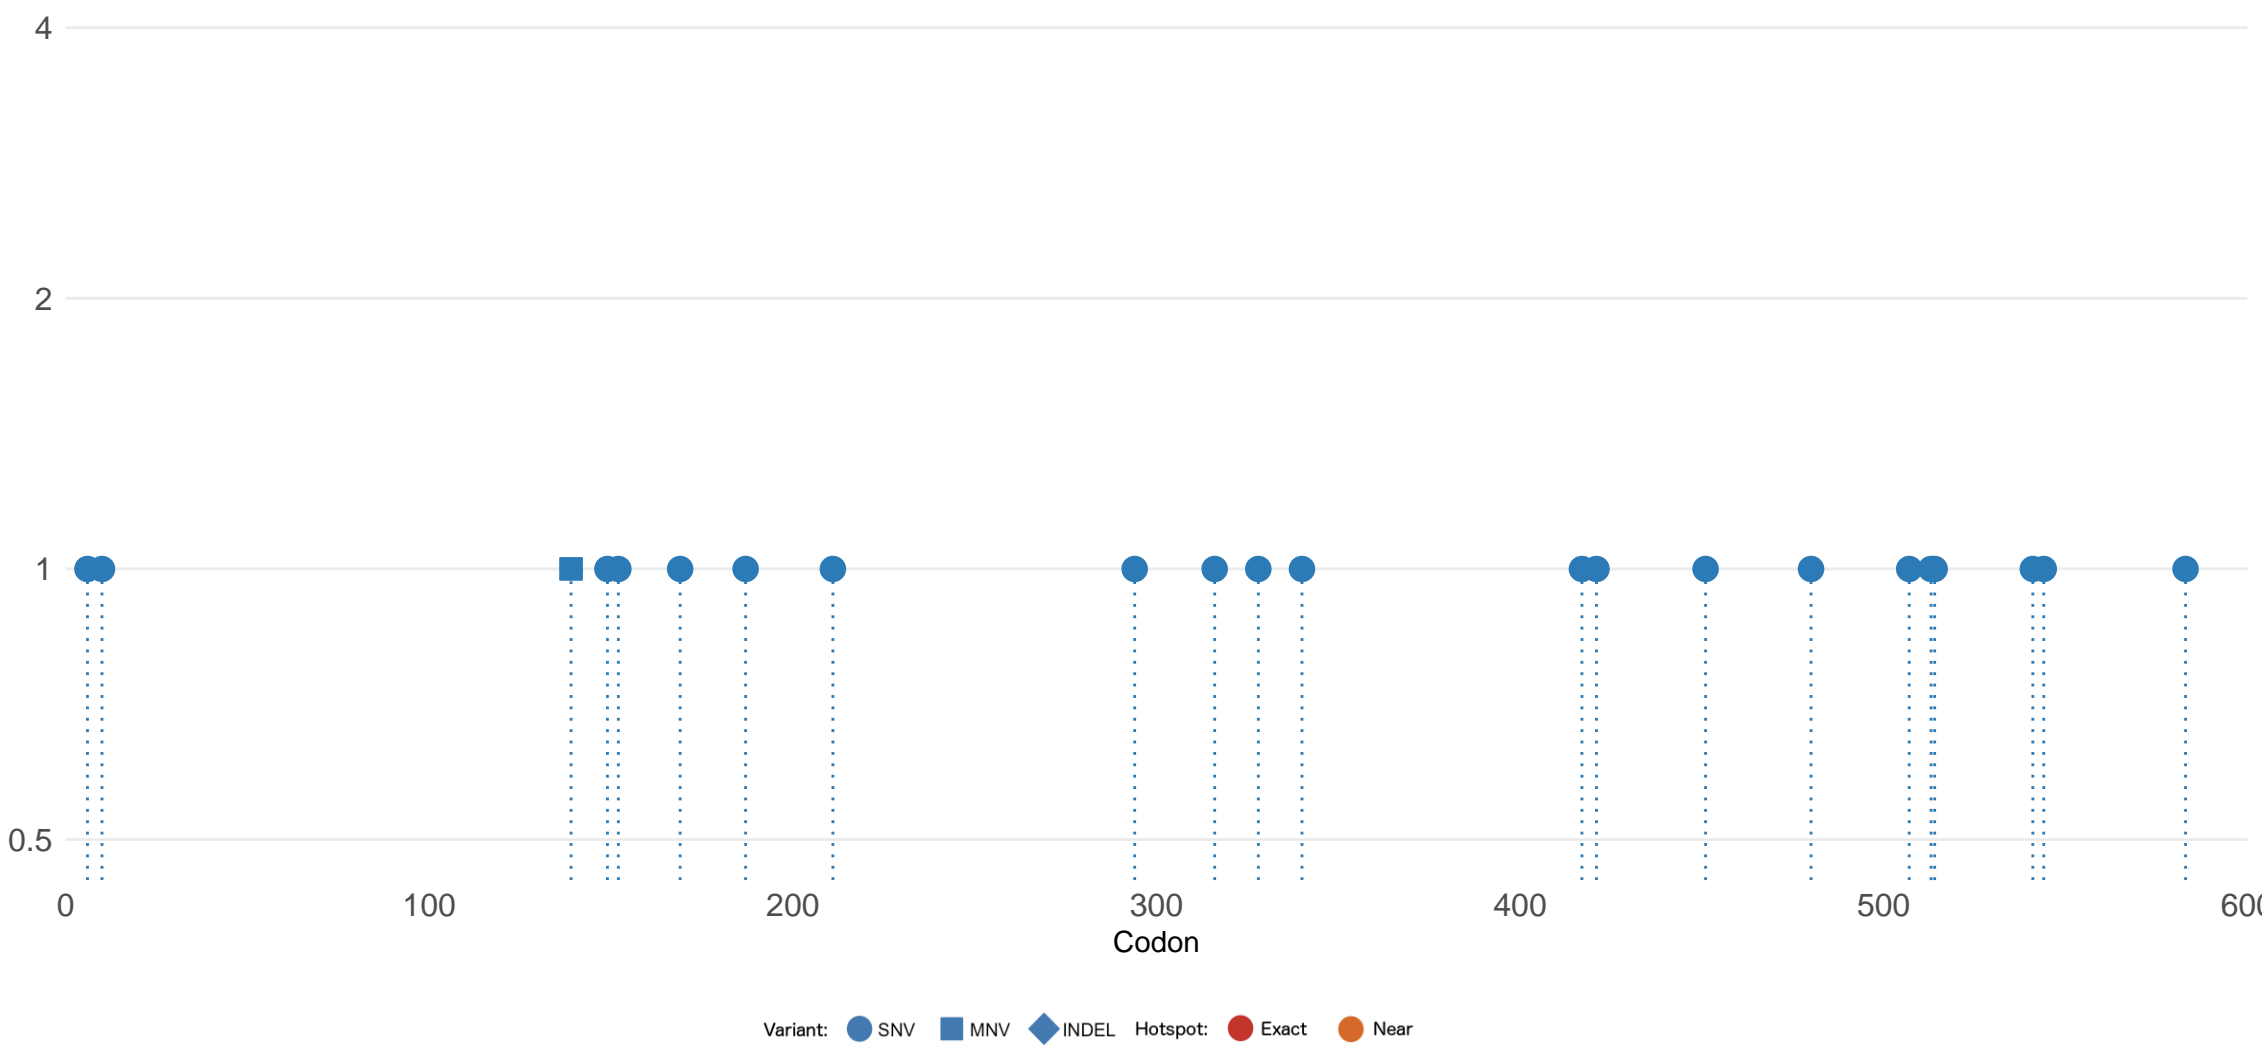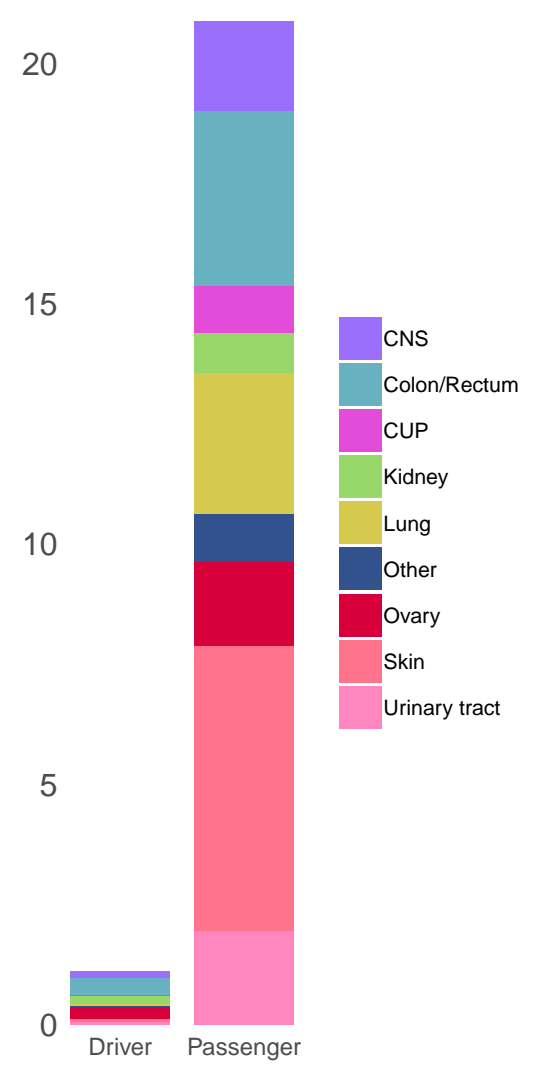

# KRTAP5-5 Variants

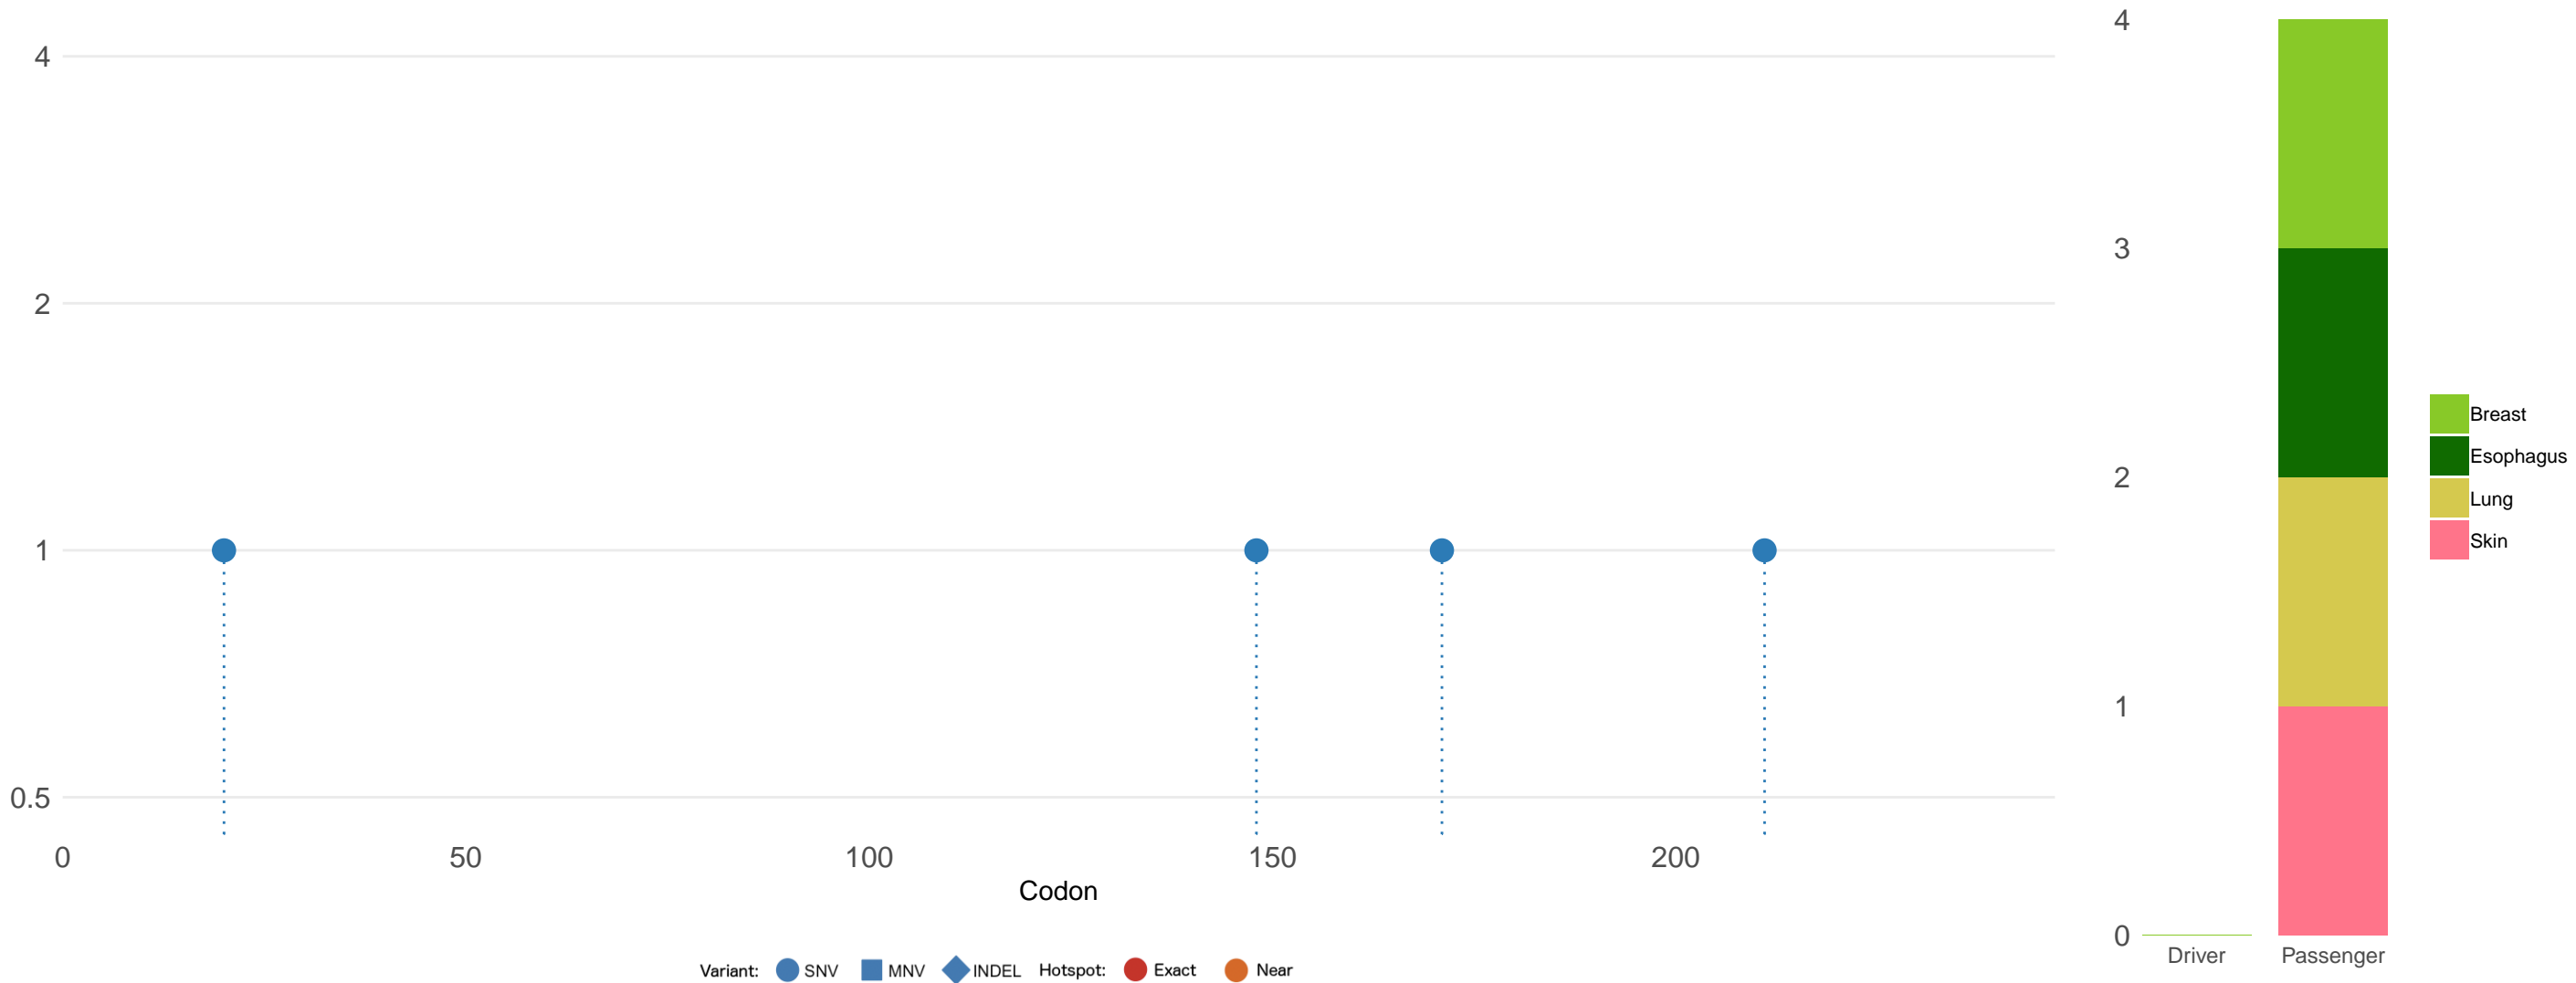

# MAP2K1 Variants

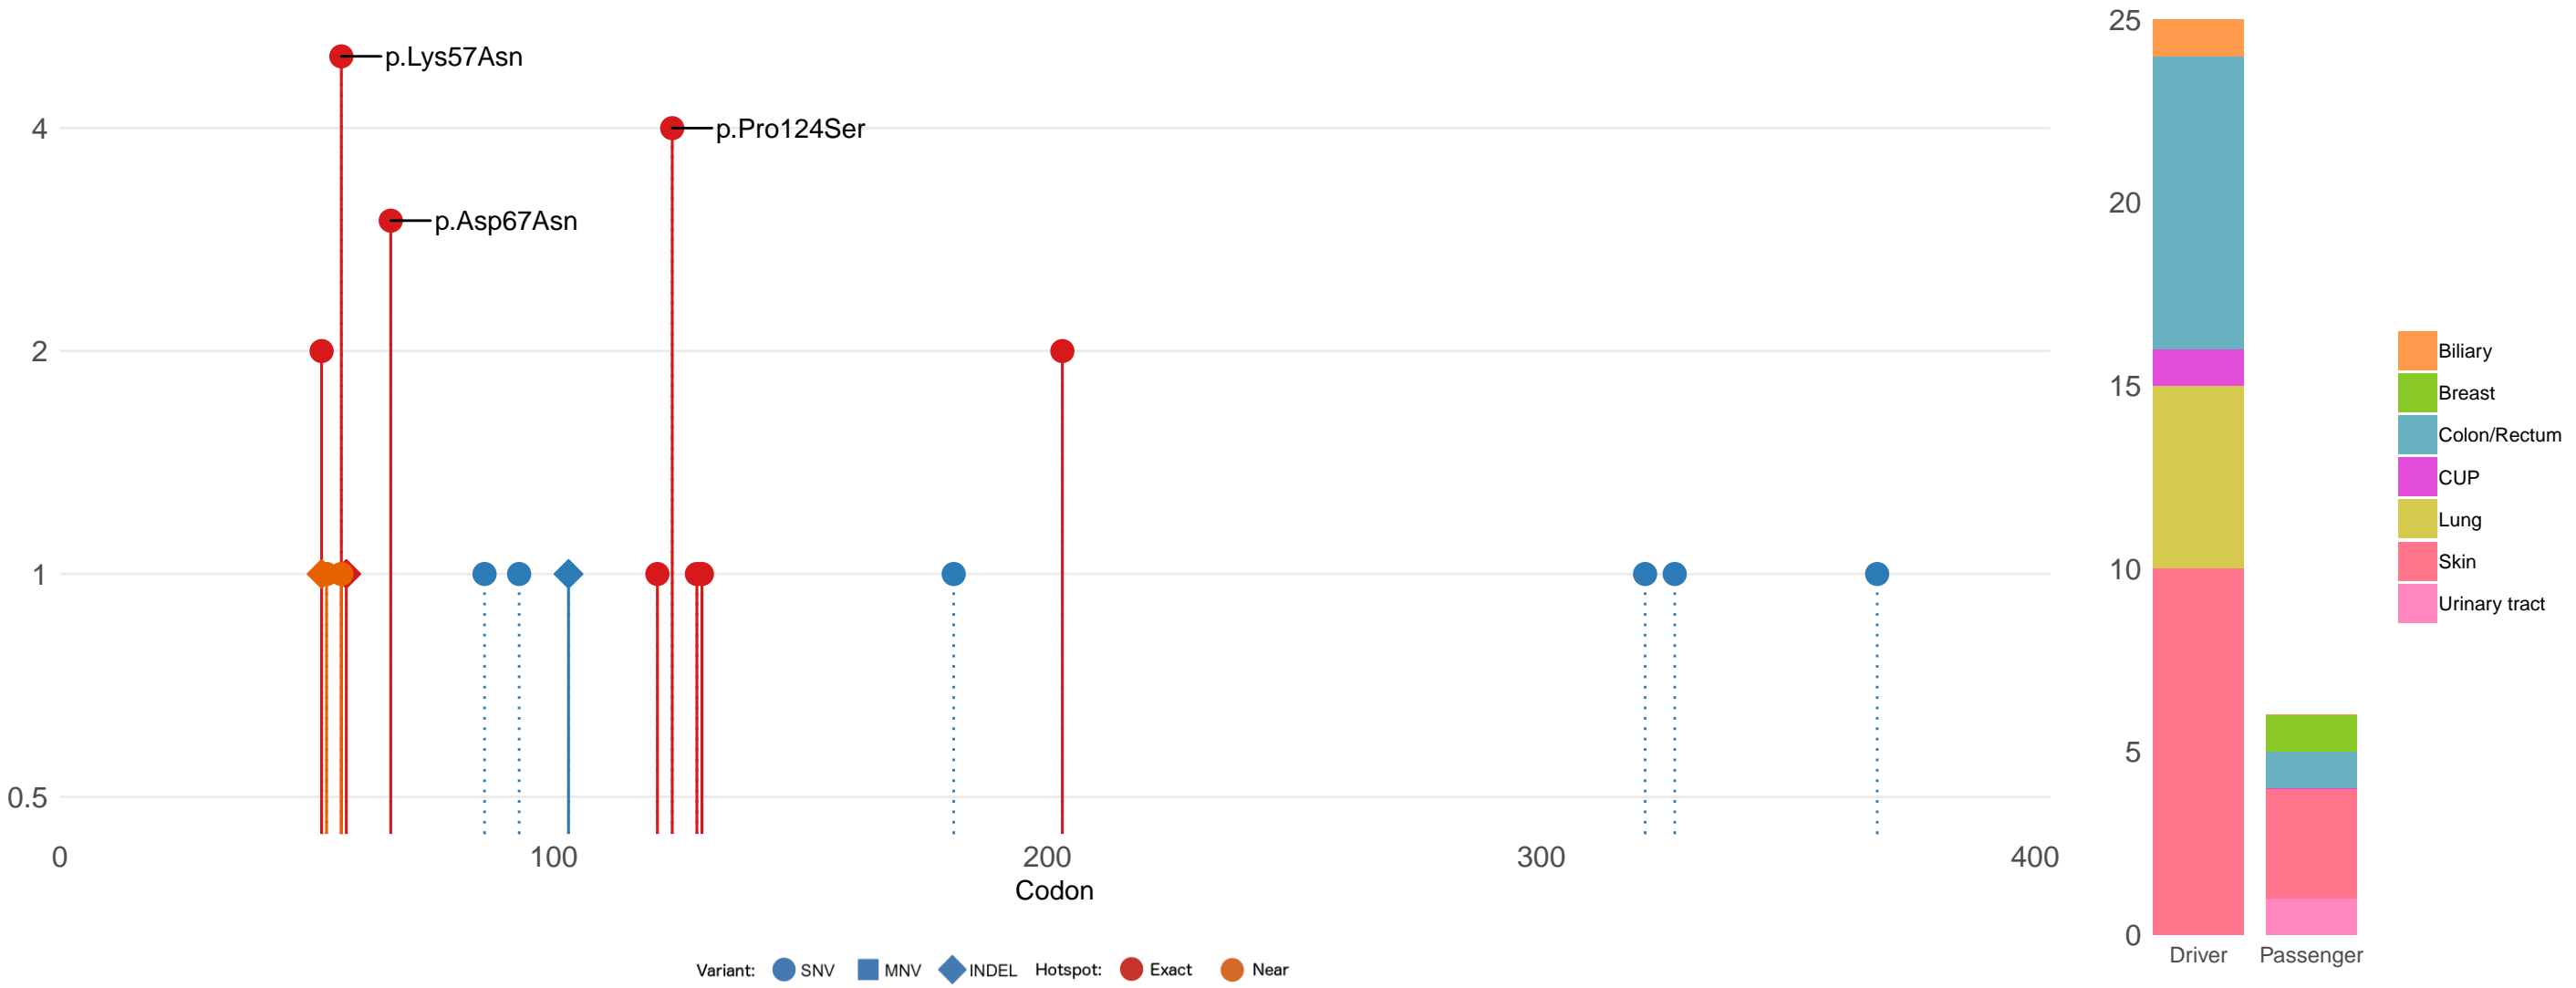

# MAP2K2 Variants

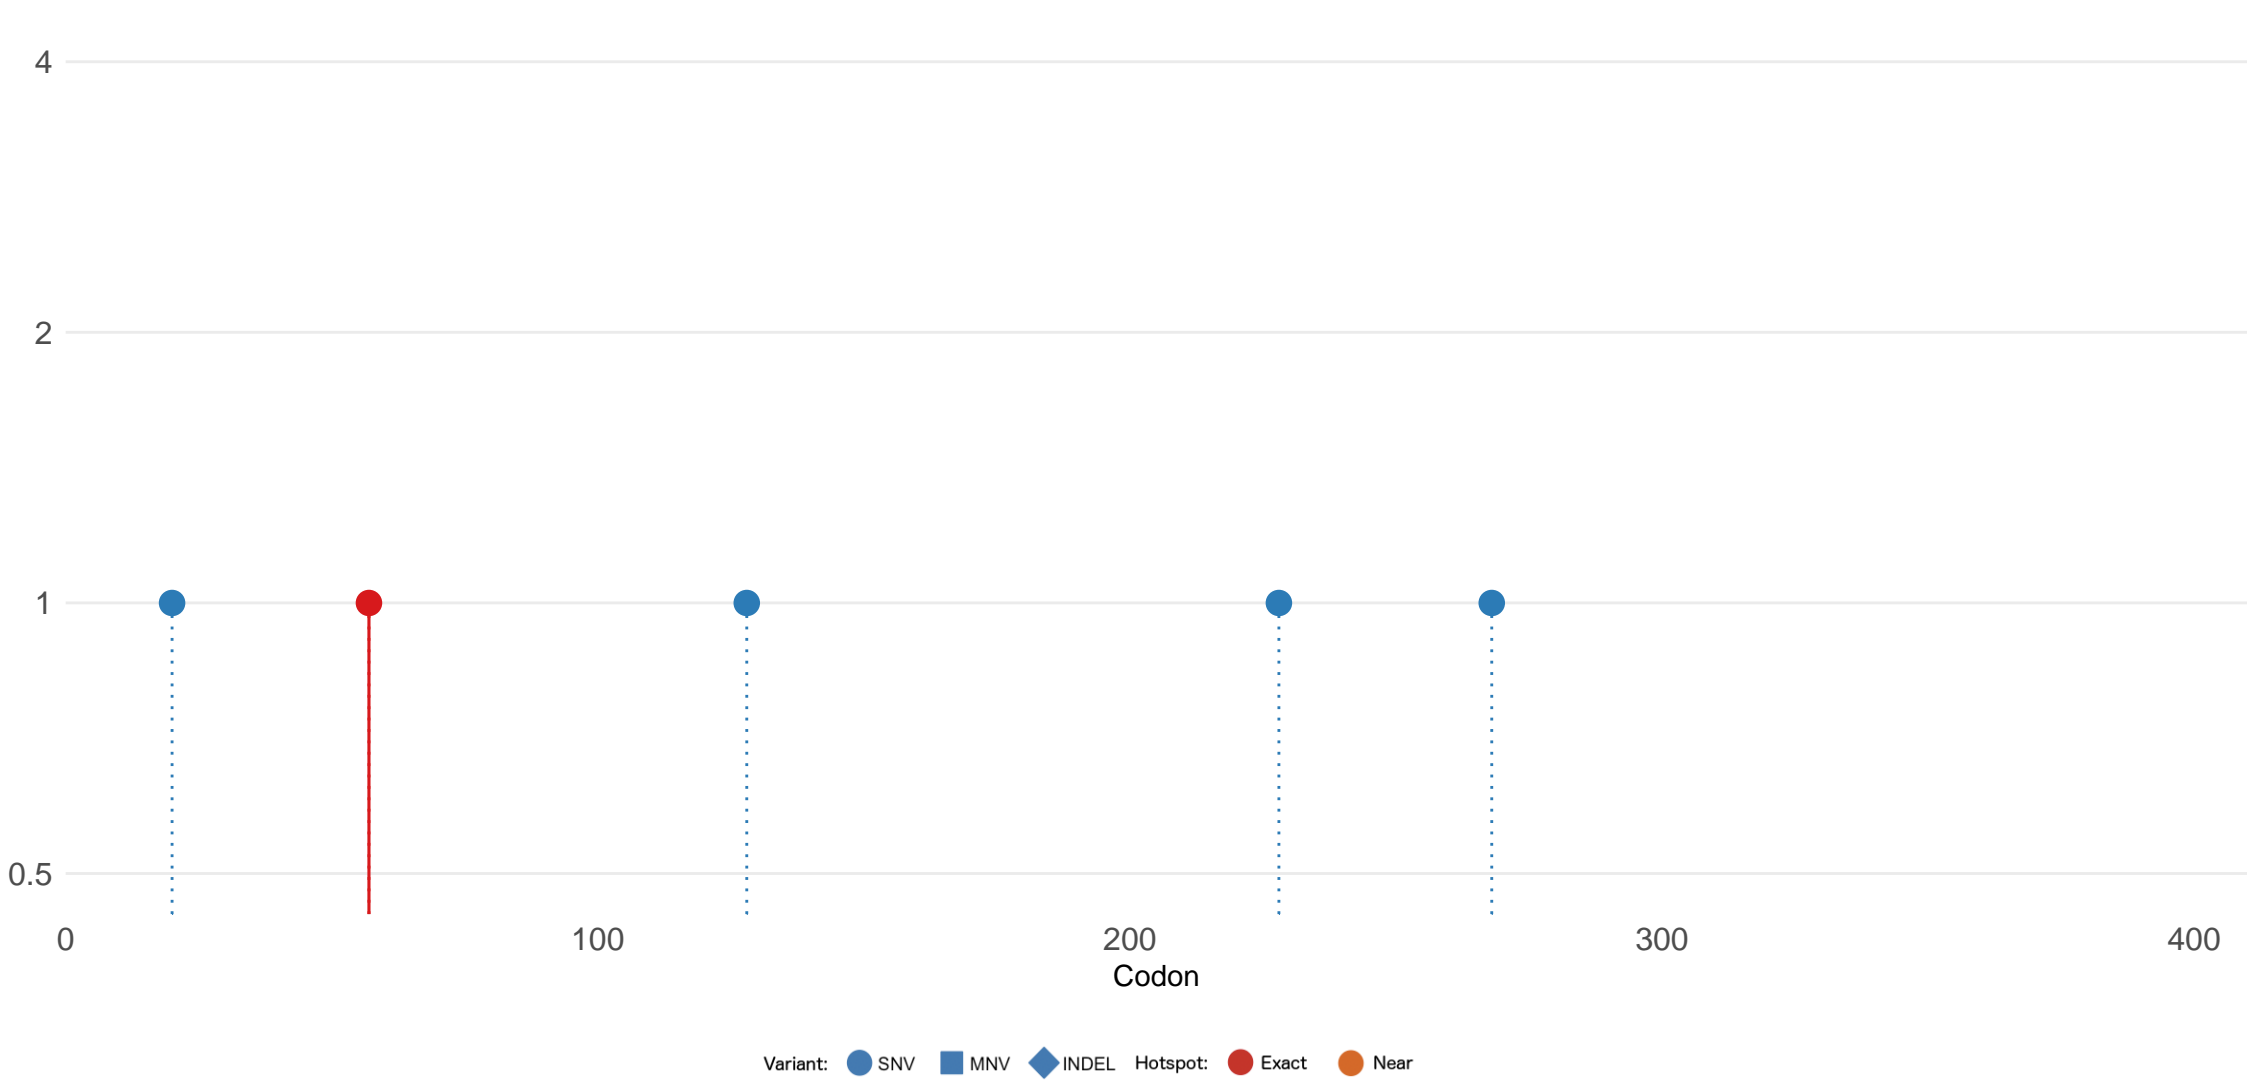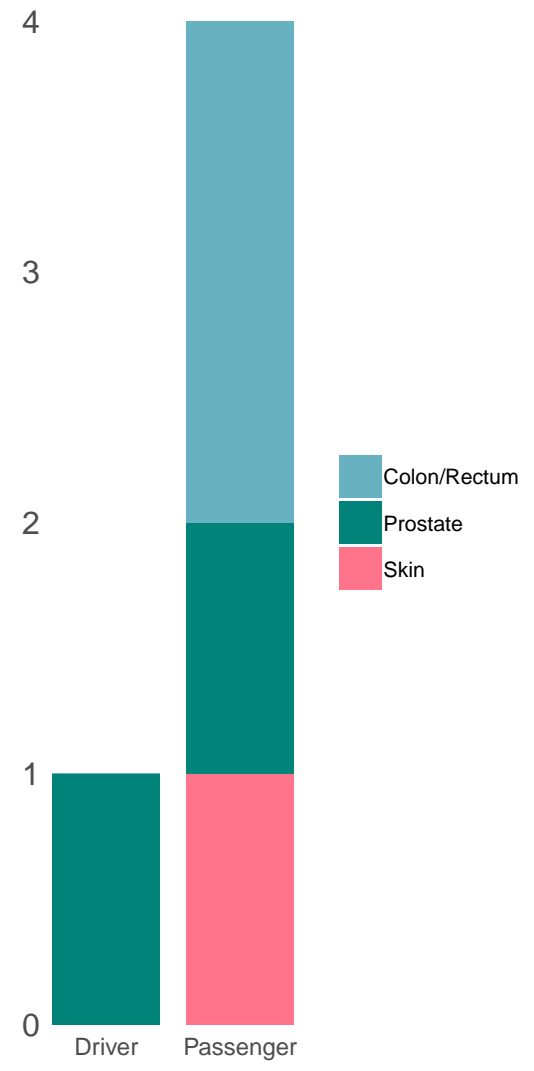

# MAP3K13 Variants

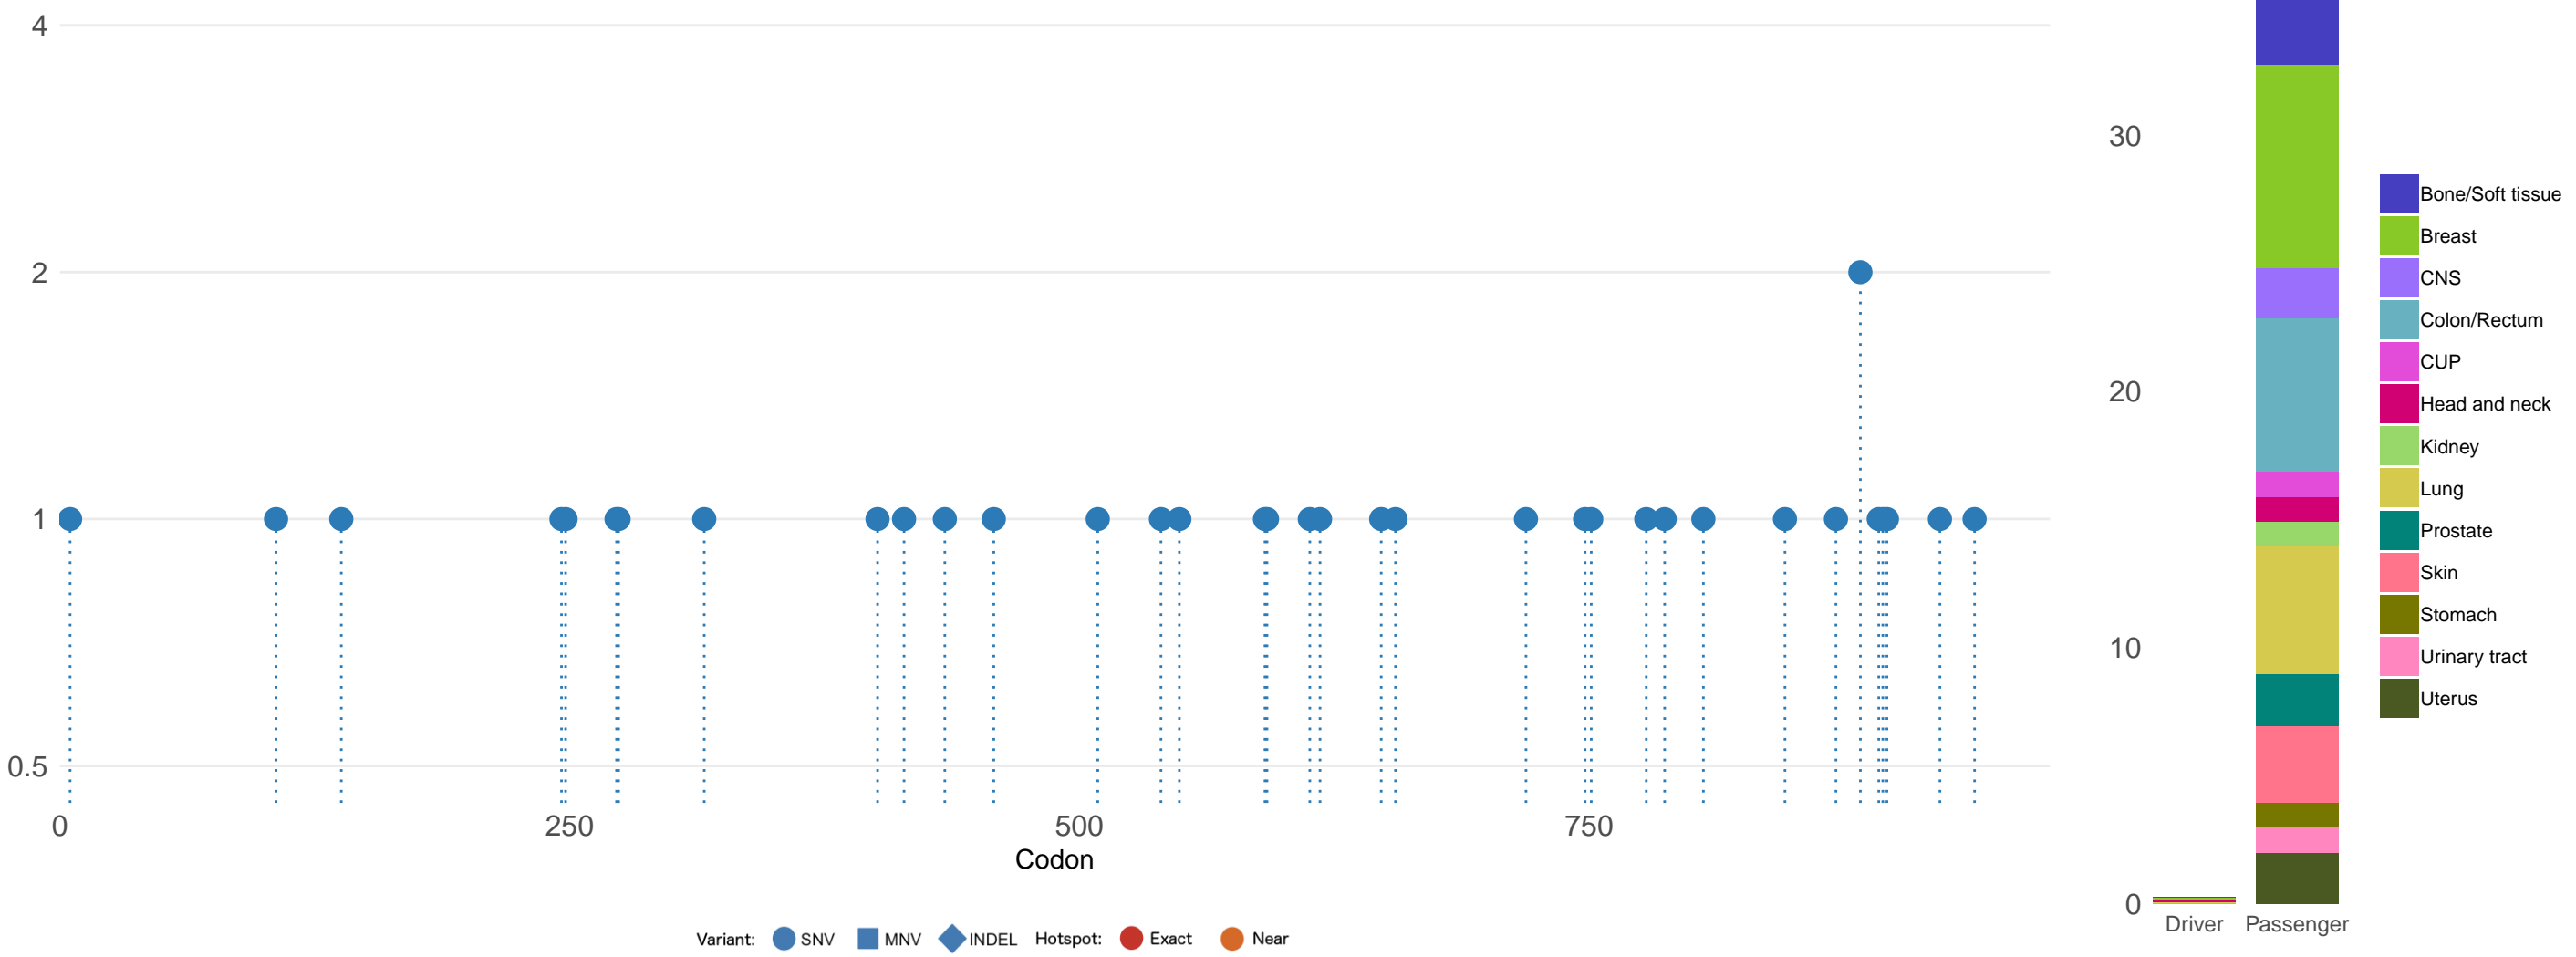



# MET Variants

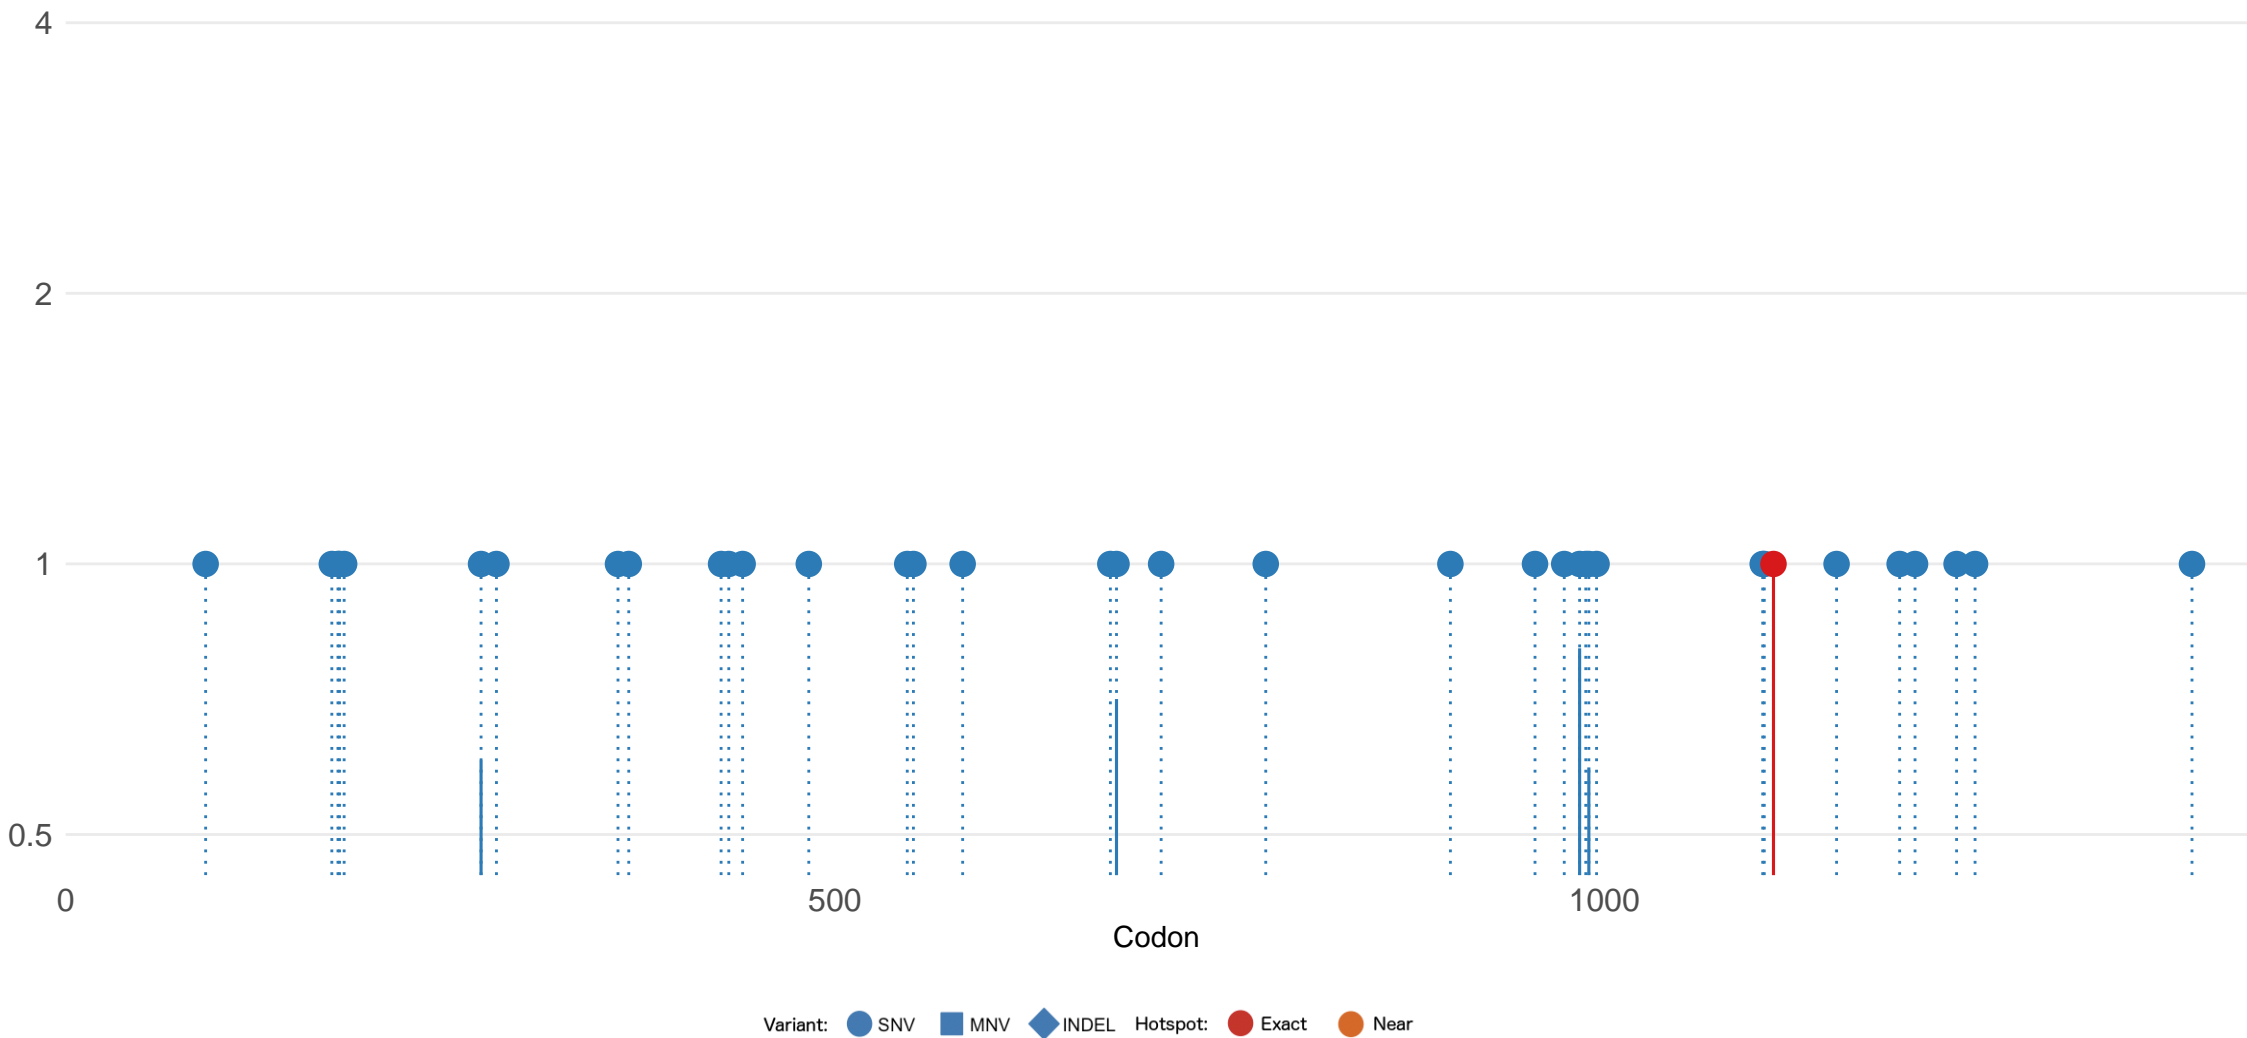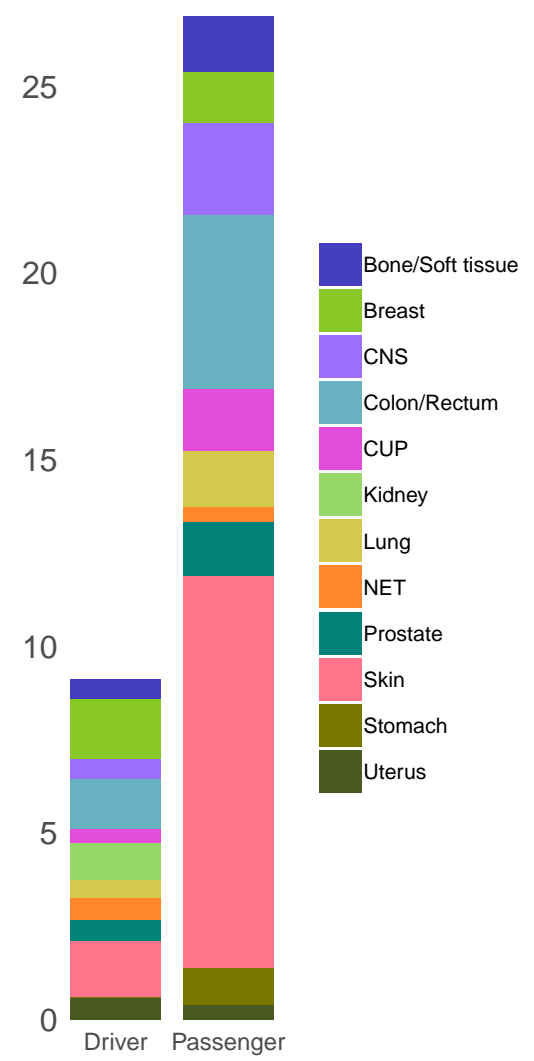

# MPL Variants

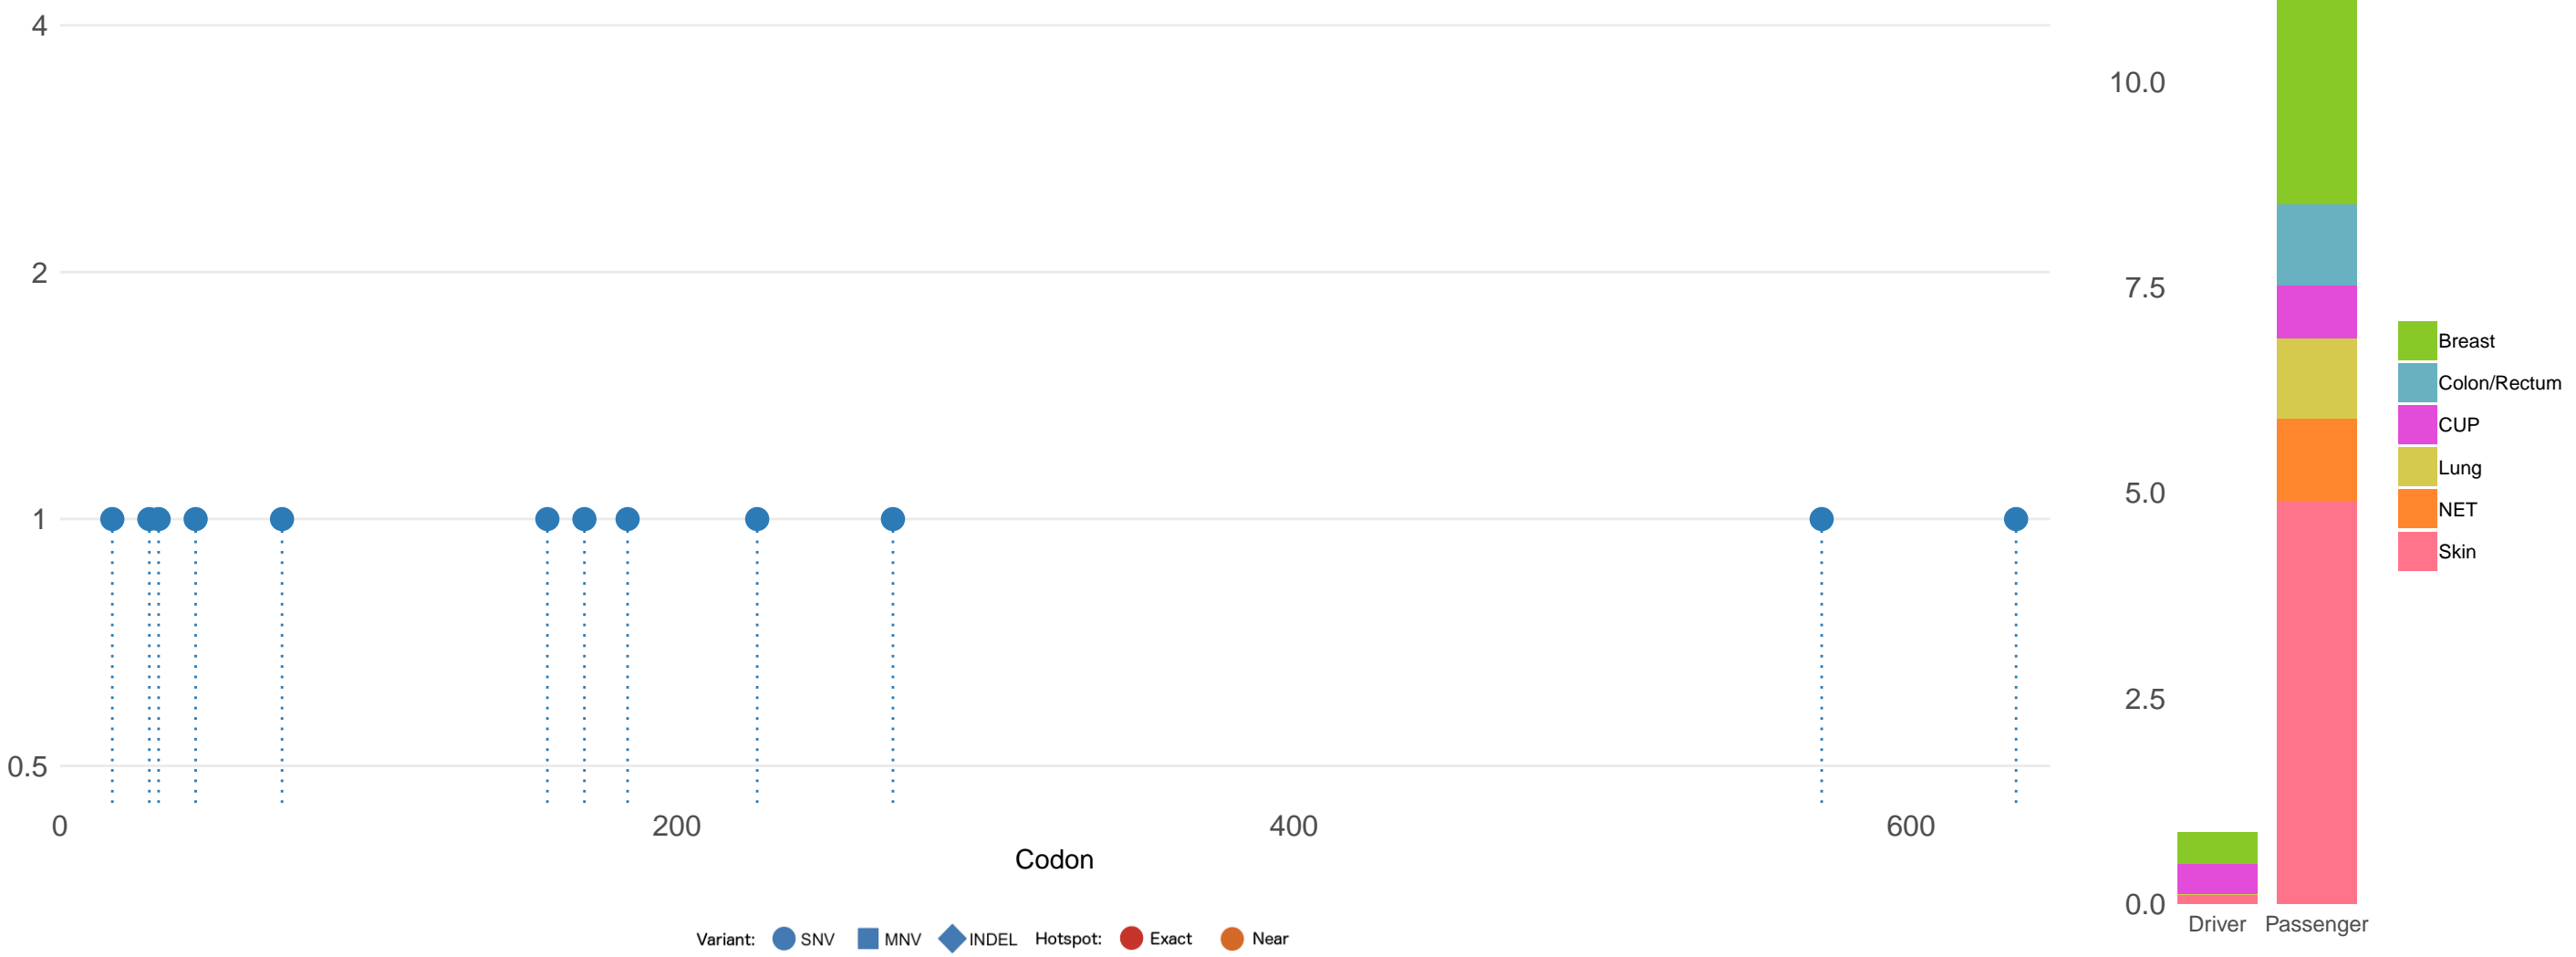

# MTOR Variants

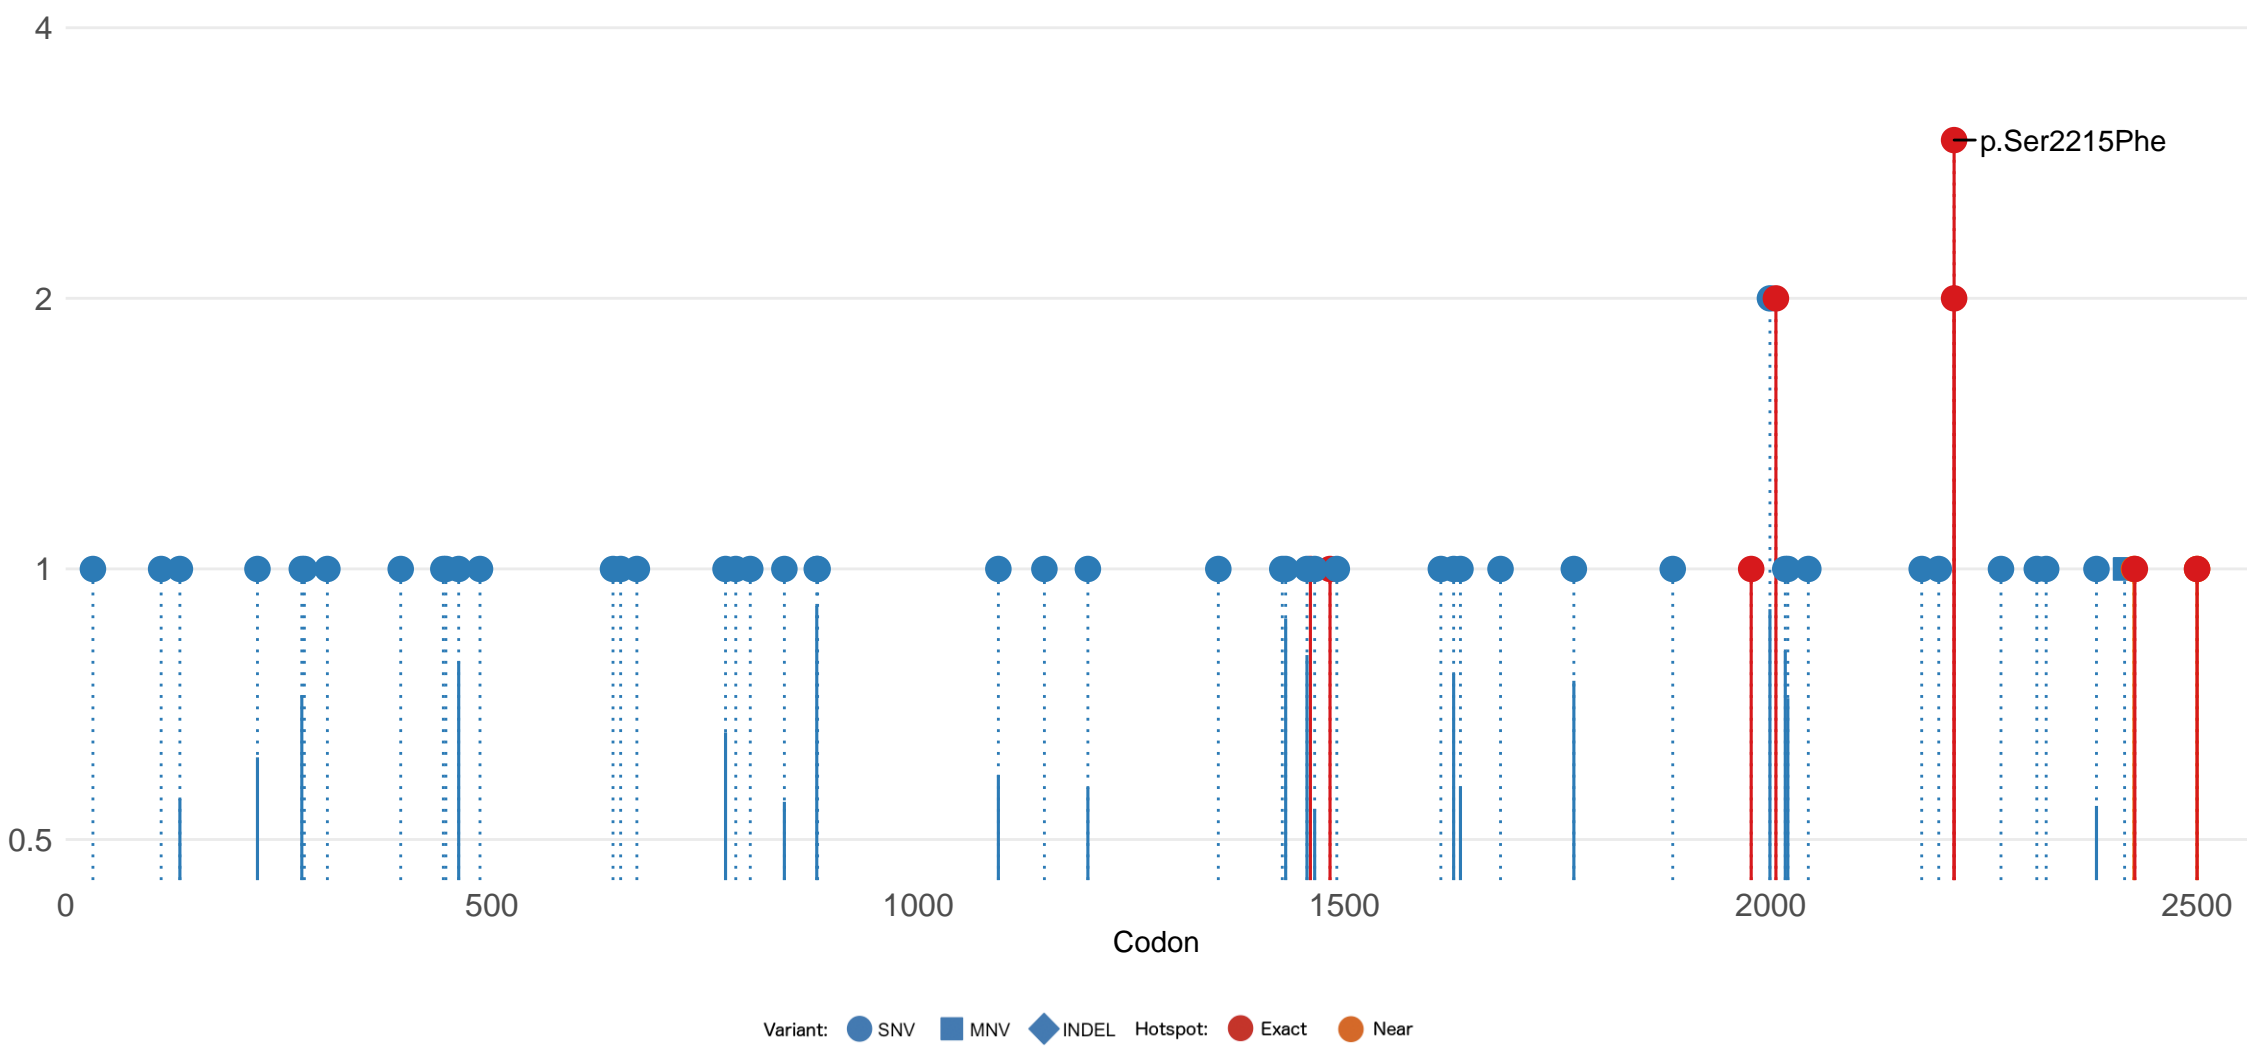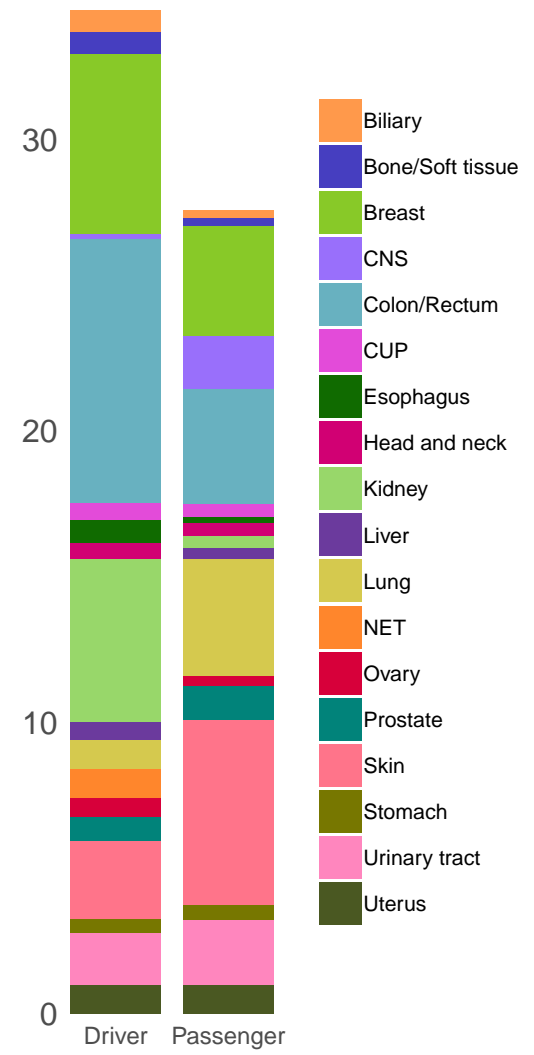

# MUC6 Variants

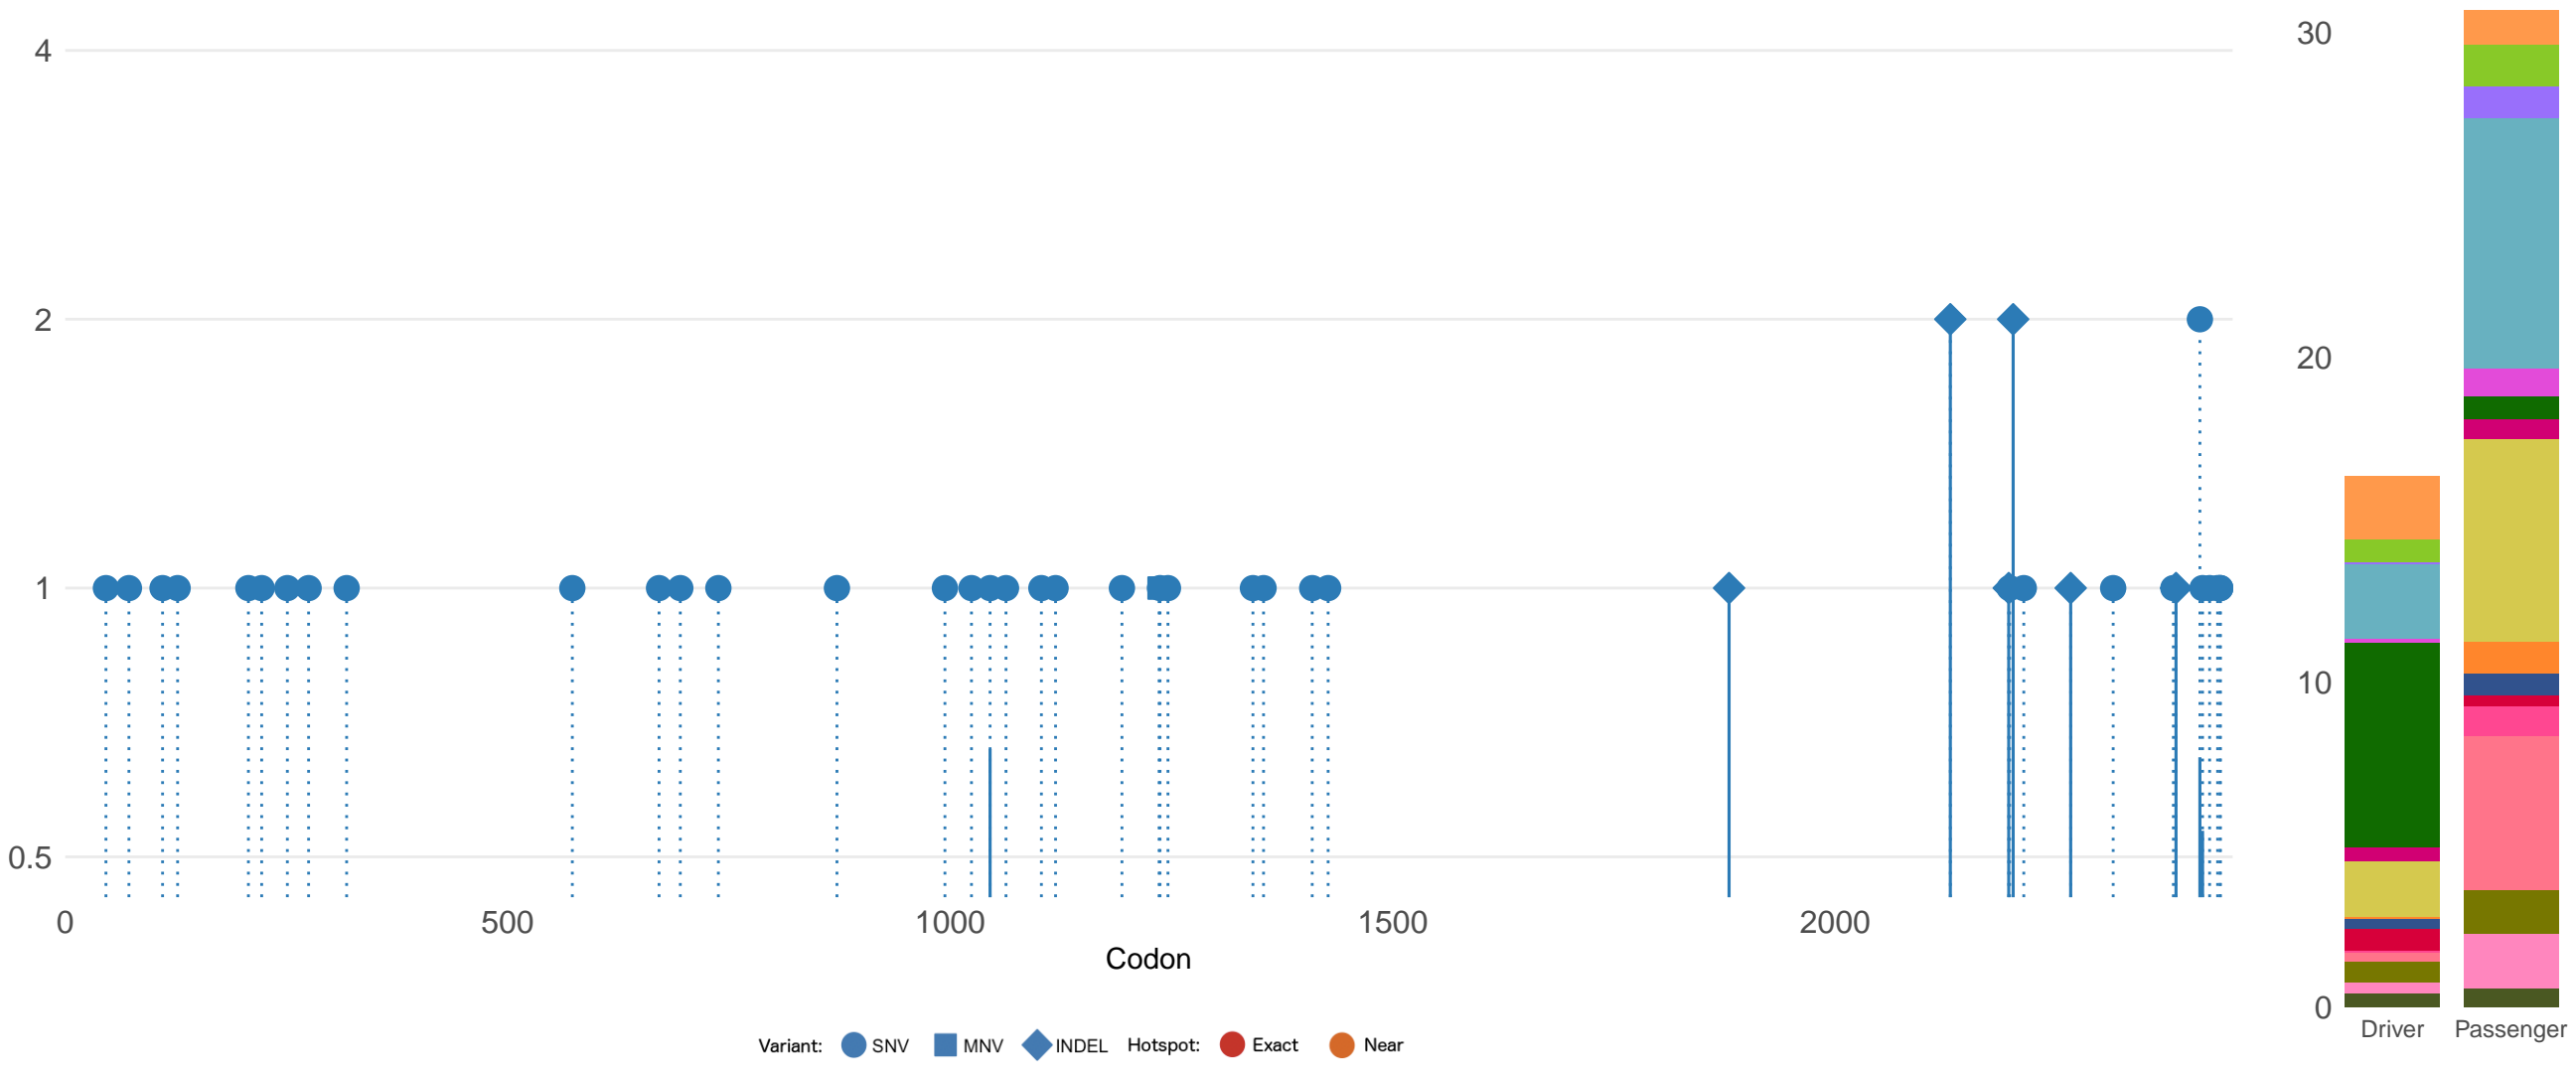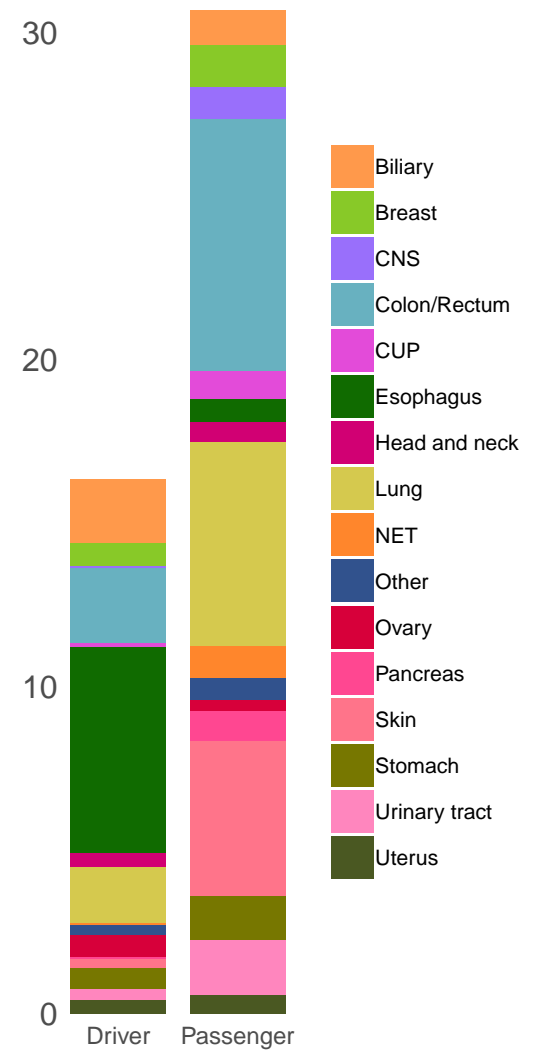

# MYD88 Variants

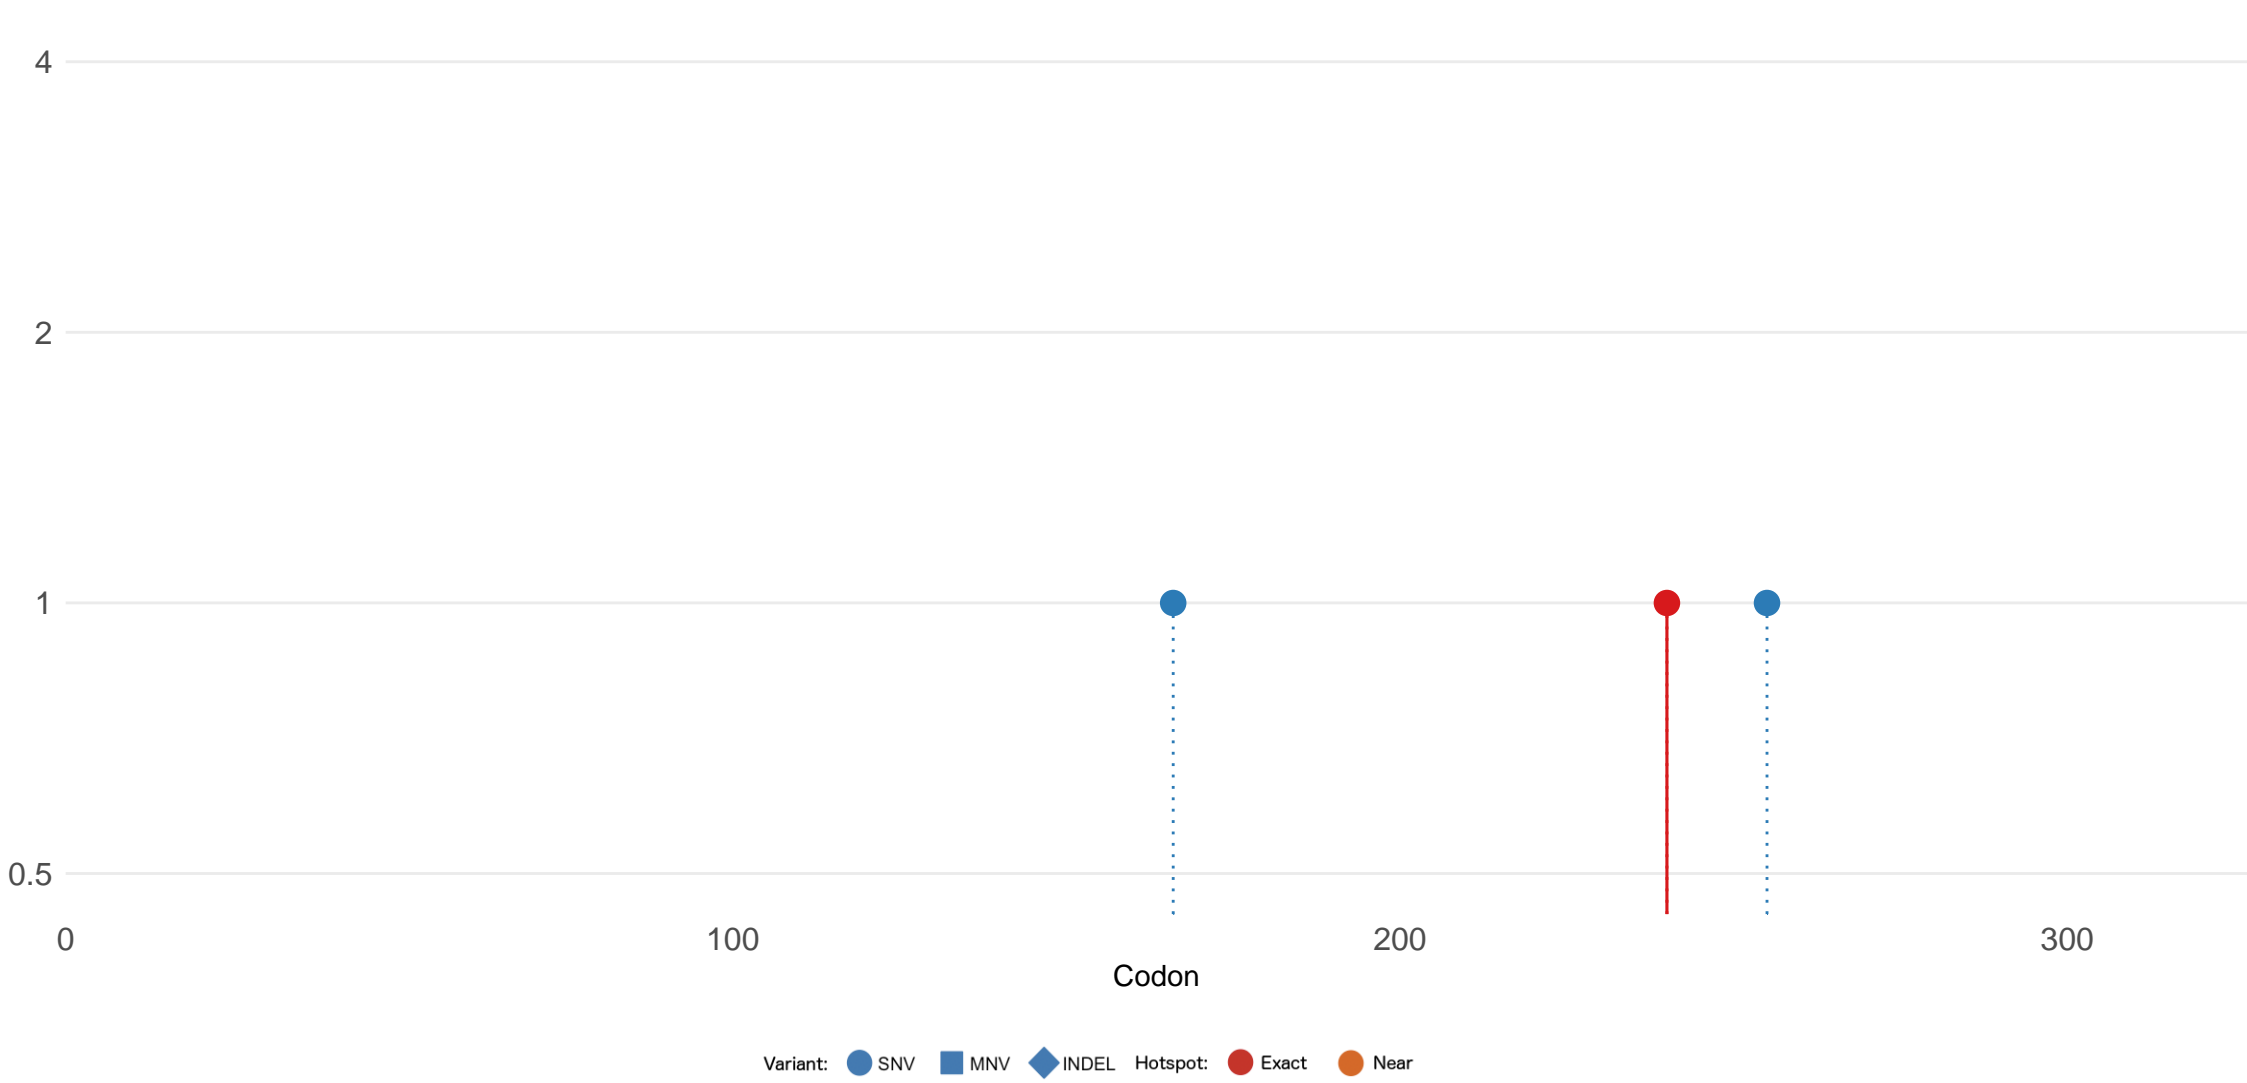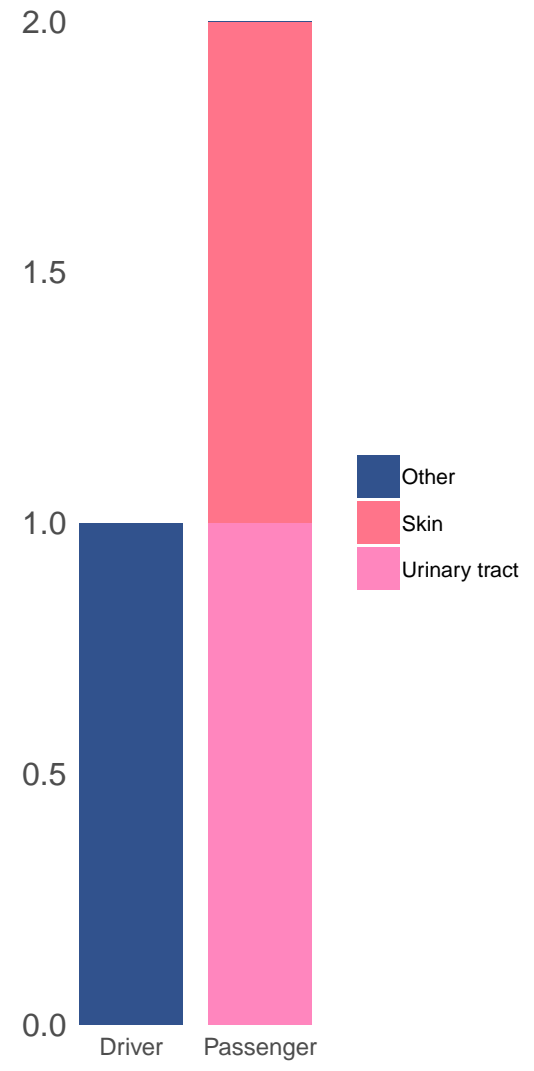

# MYOD1 Variants

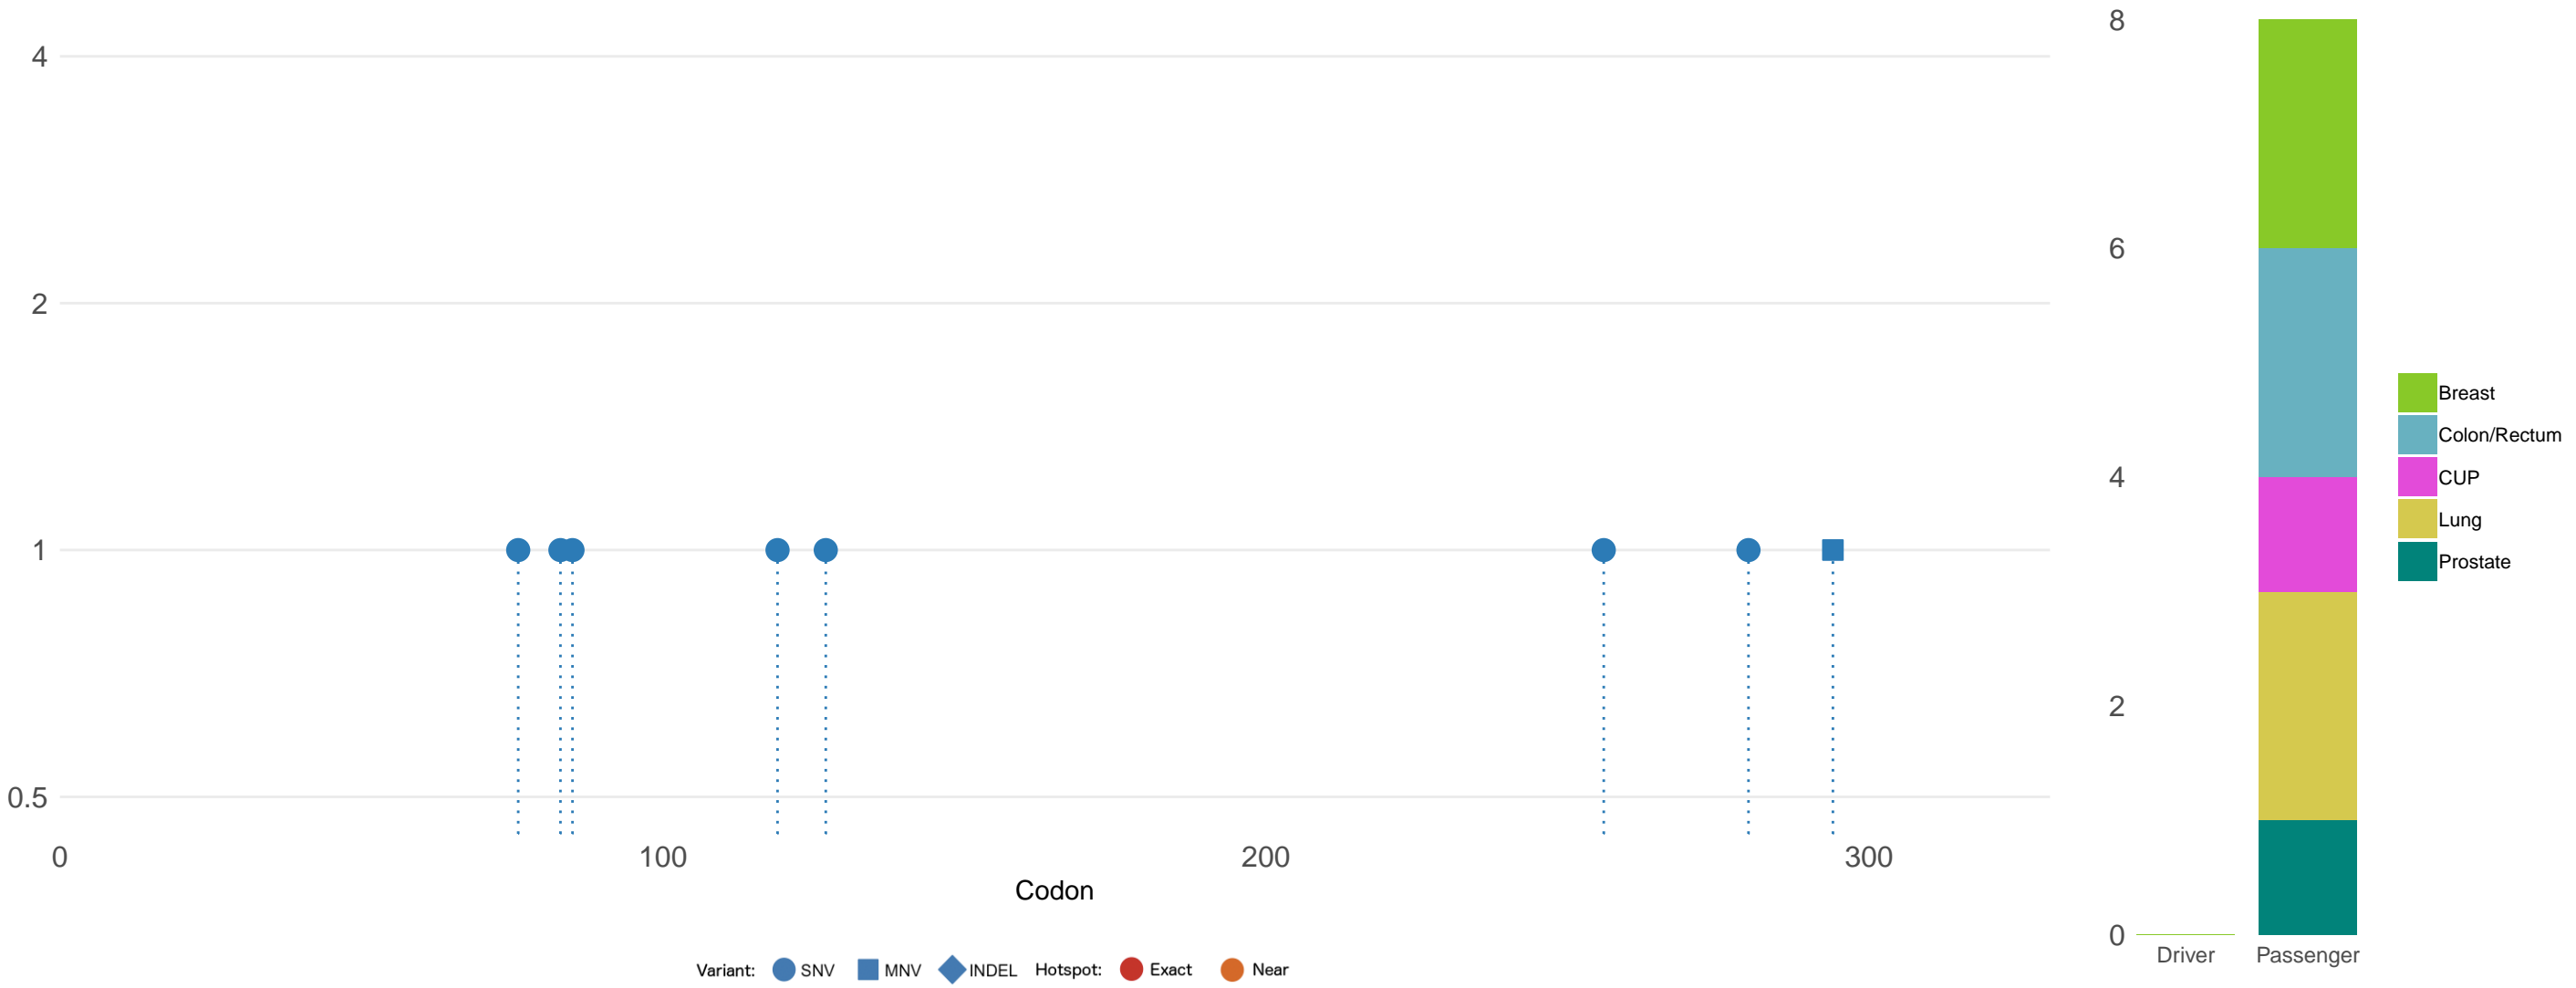

# NCOA2 Variants

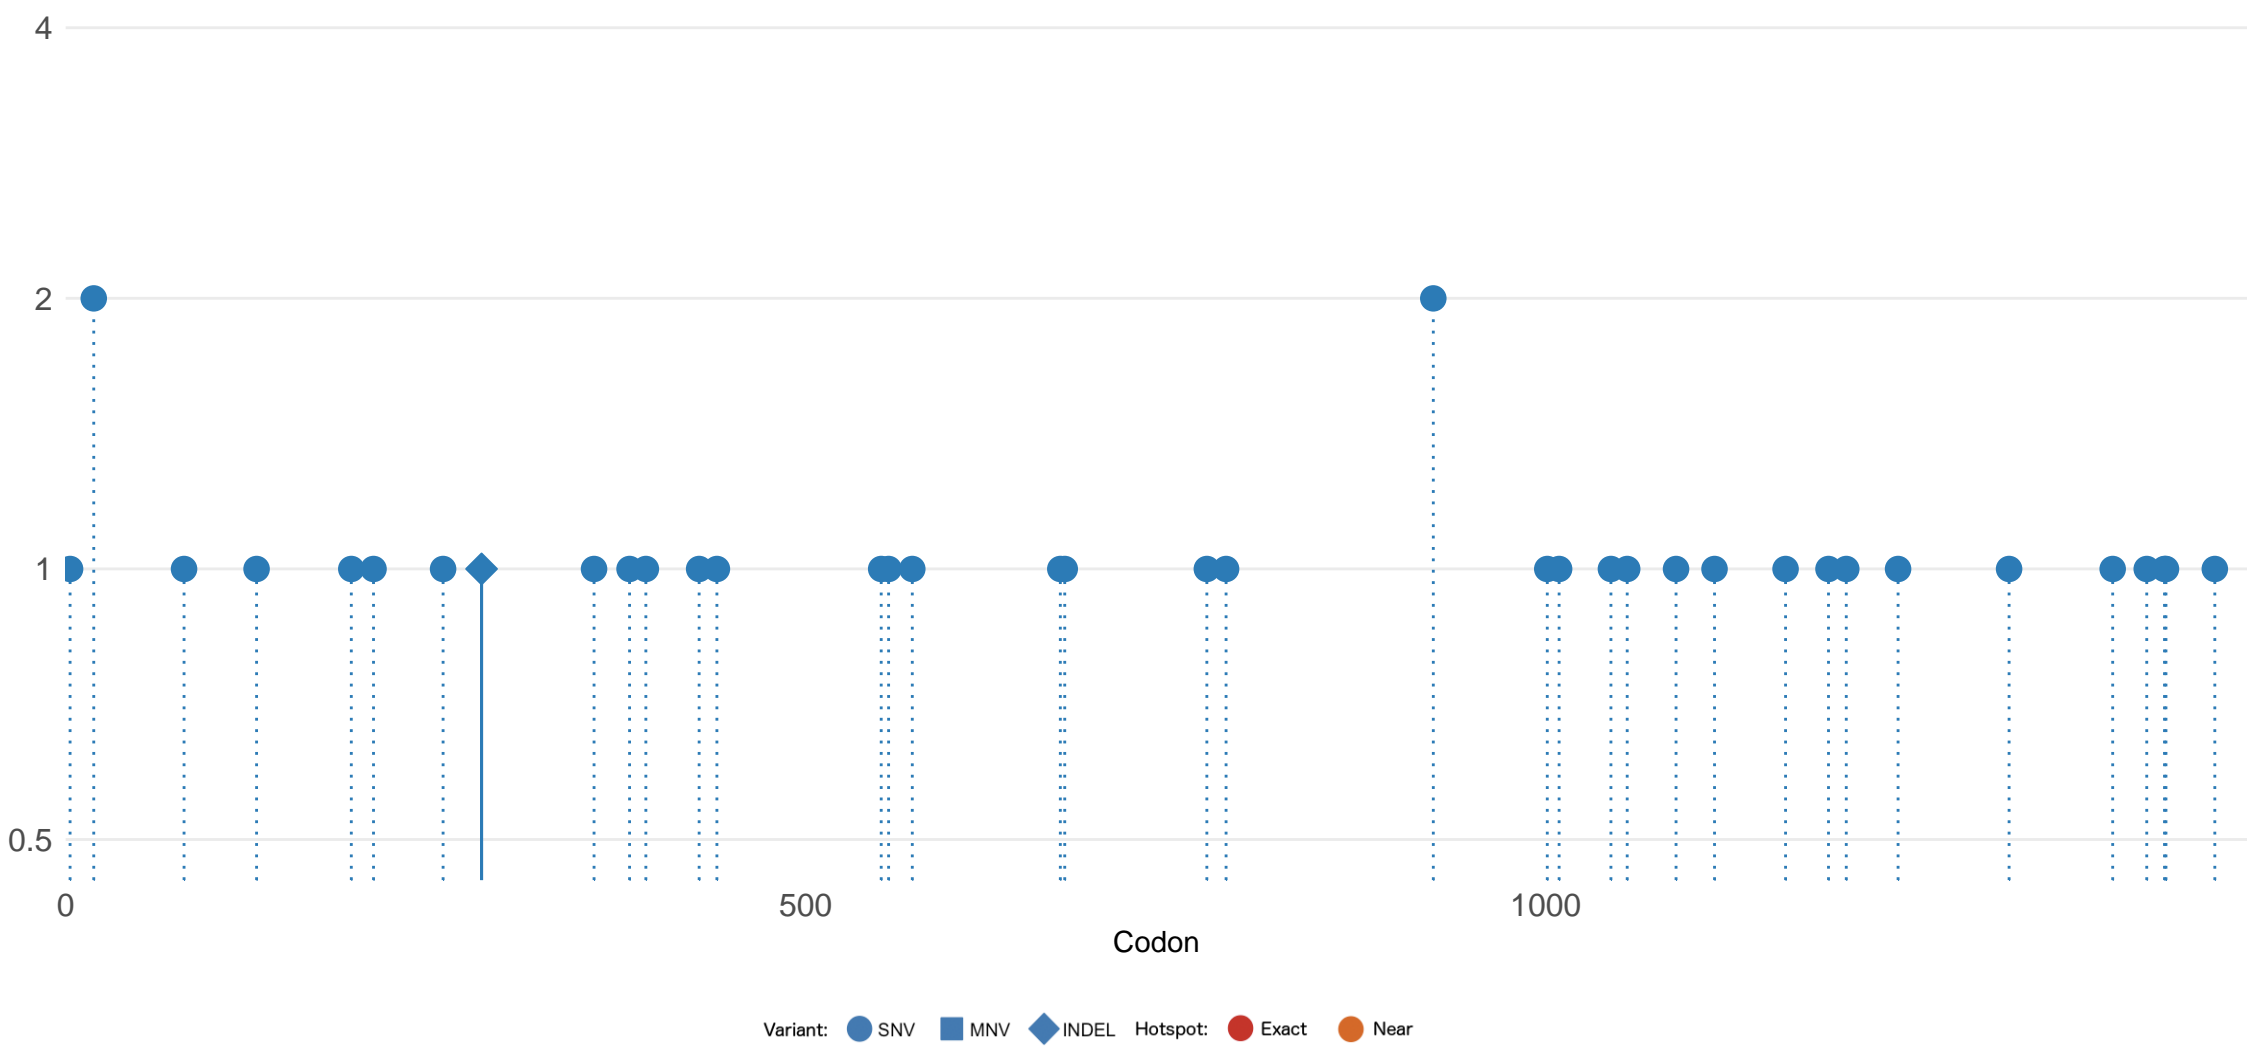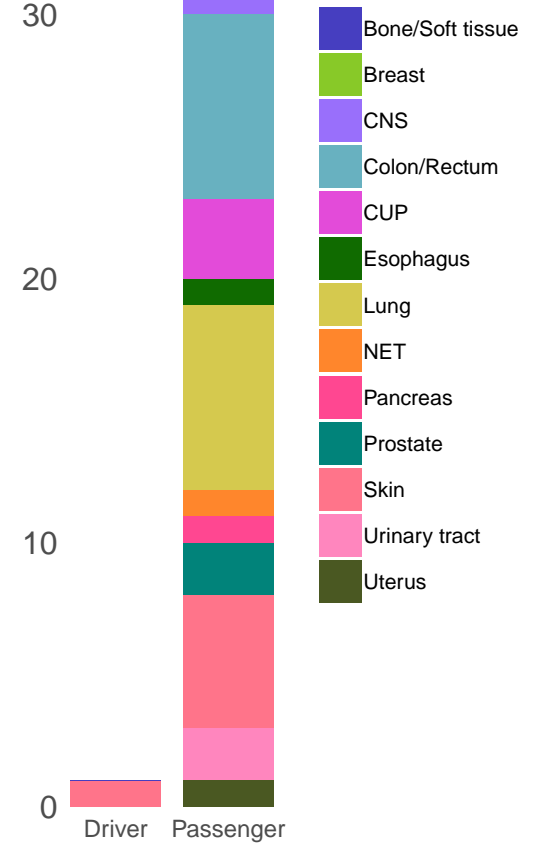

# NFE2L2 Variants

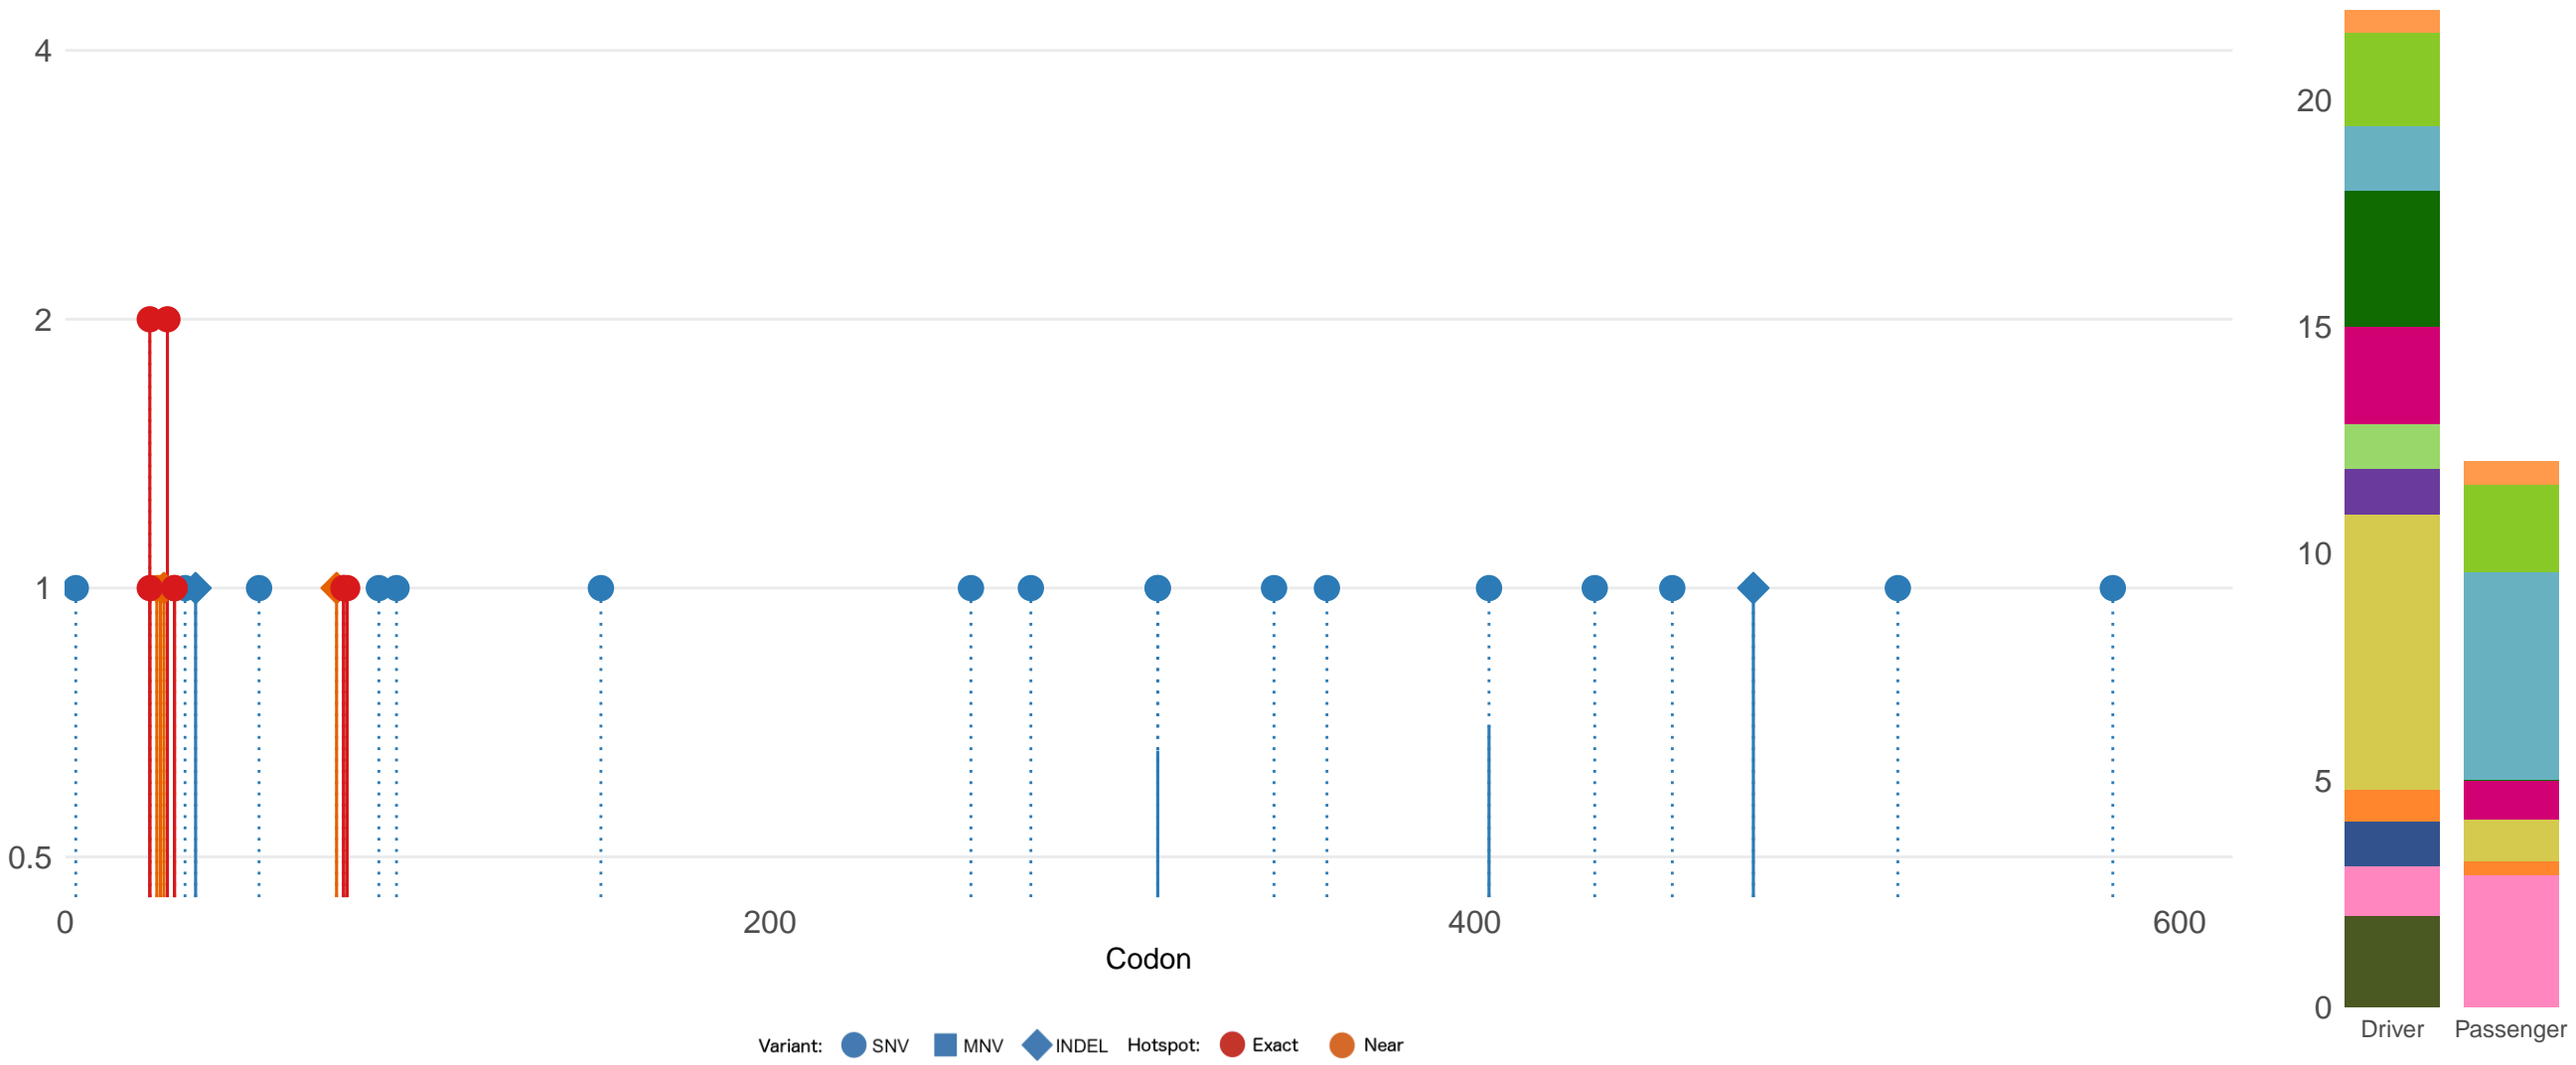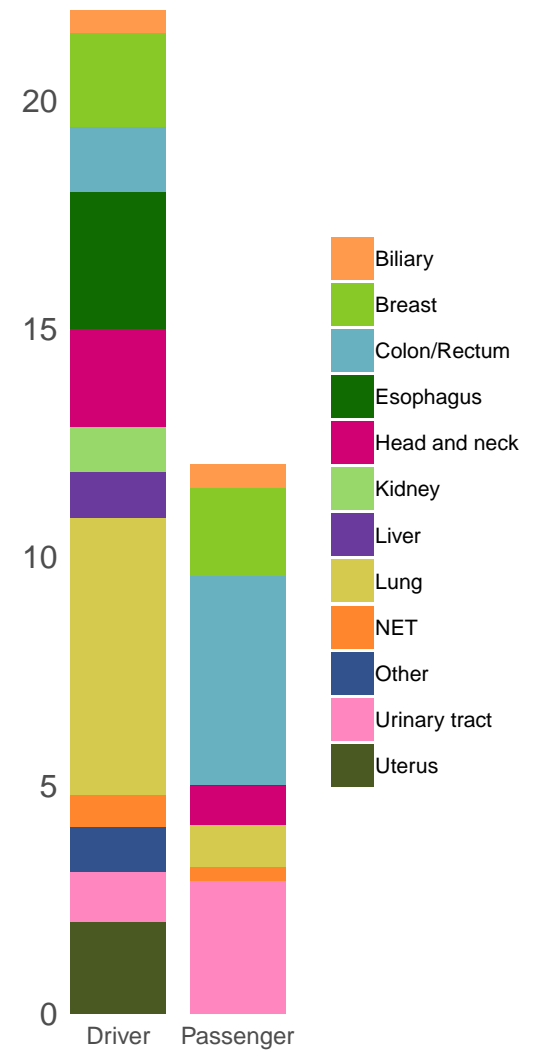



# NPM1 Variants

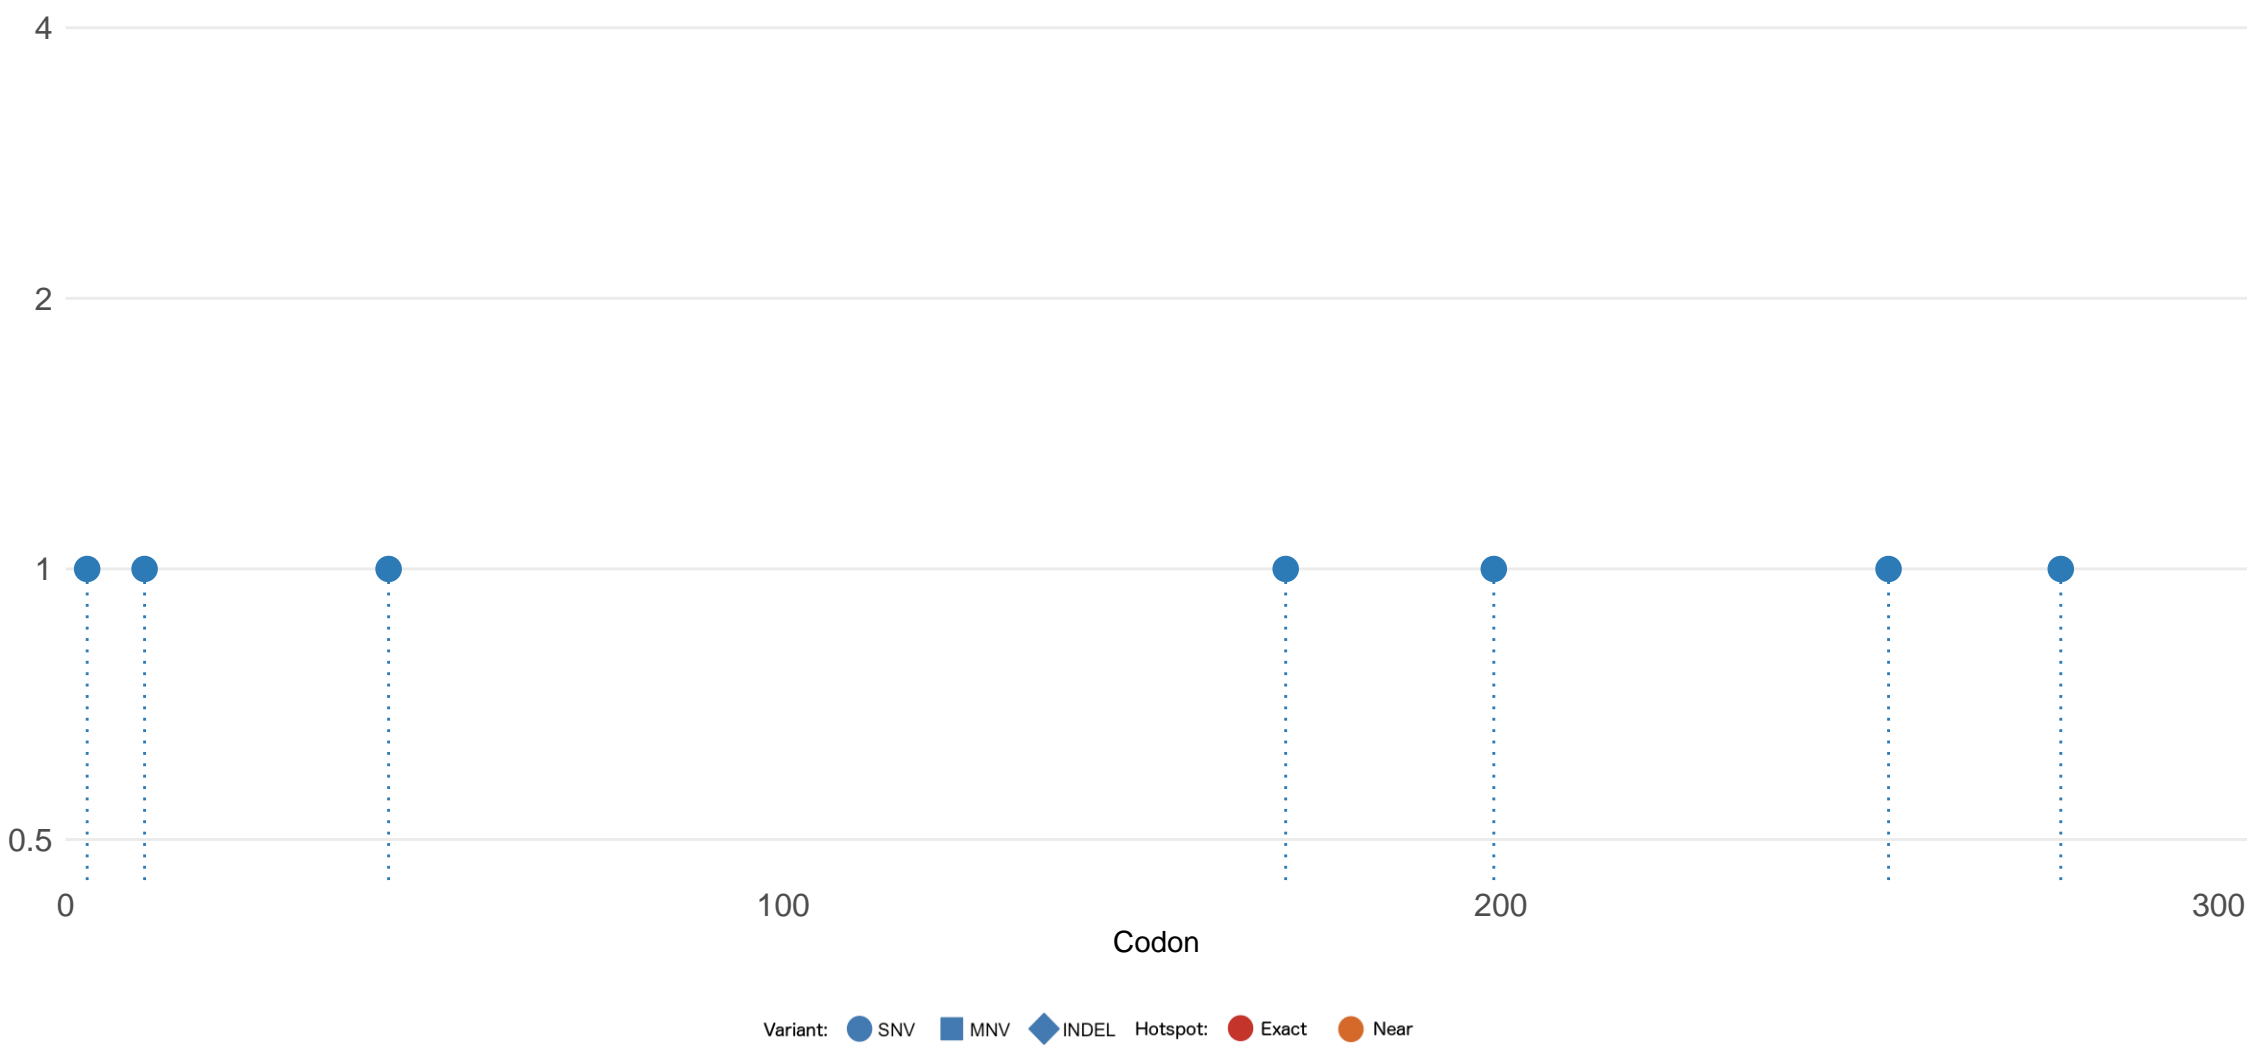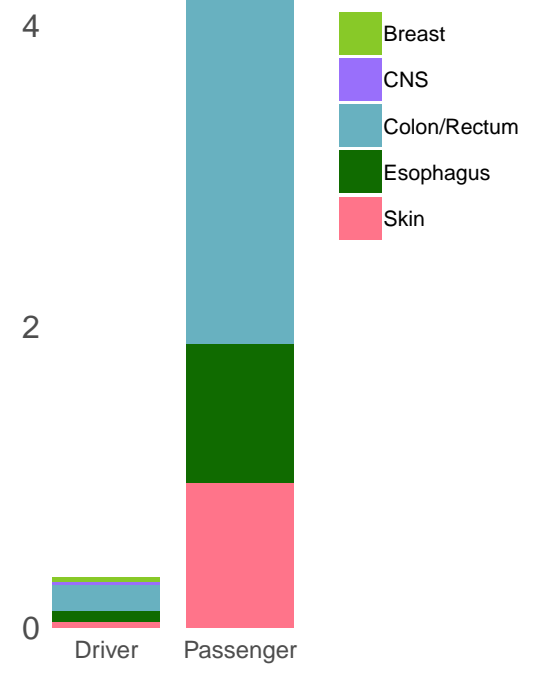

# NRAS Variants

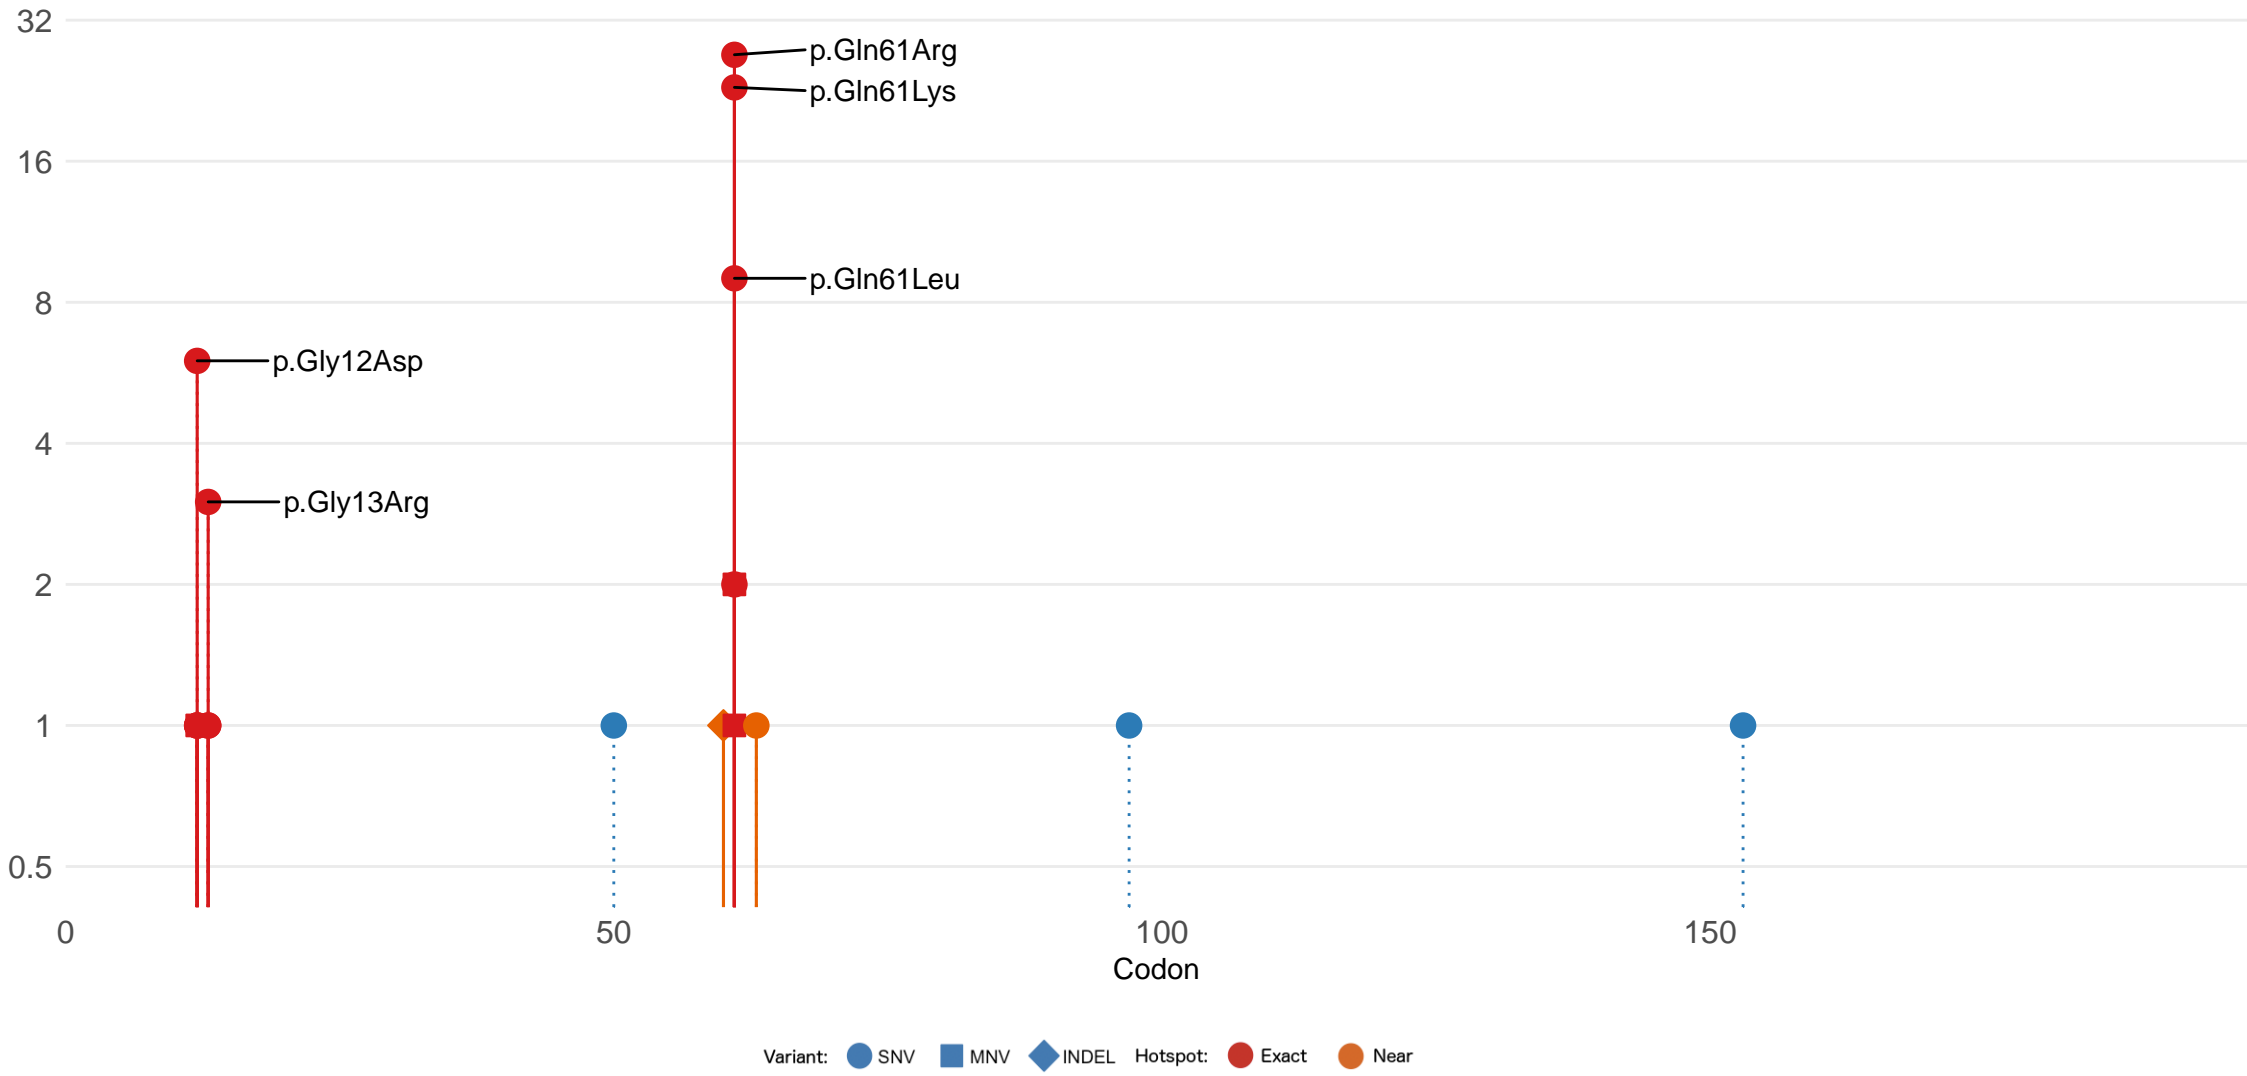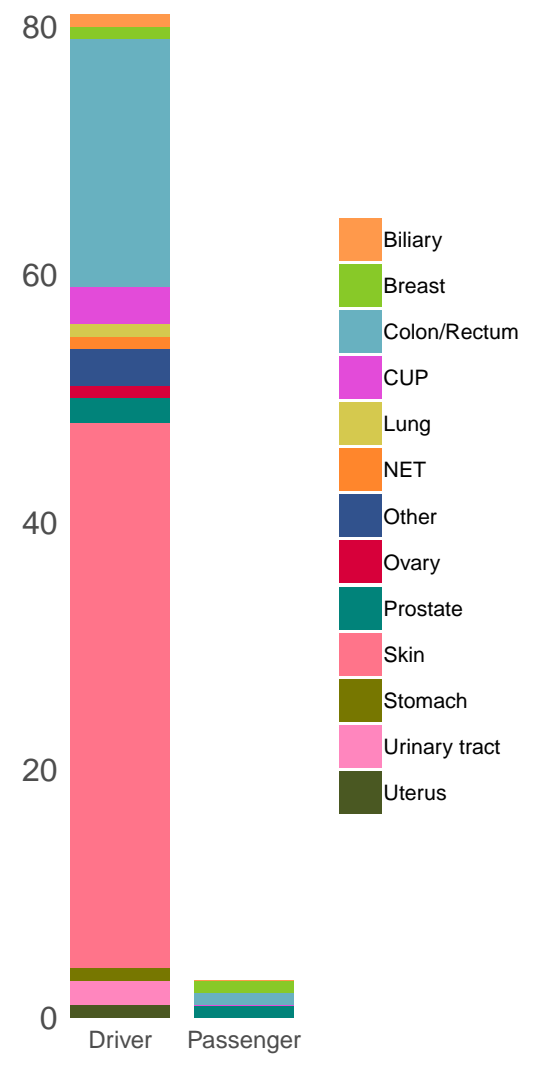

# NT5C2 Variants

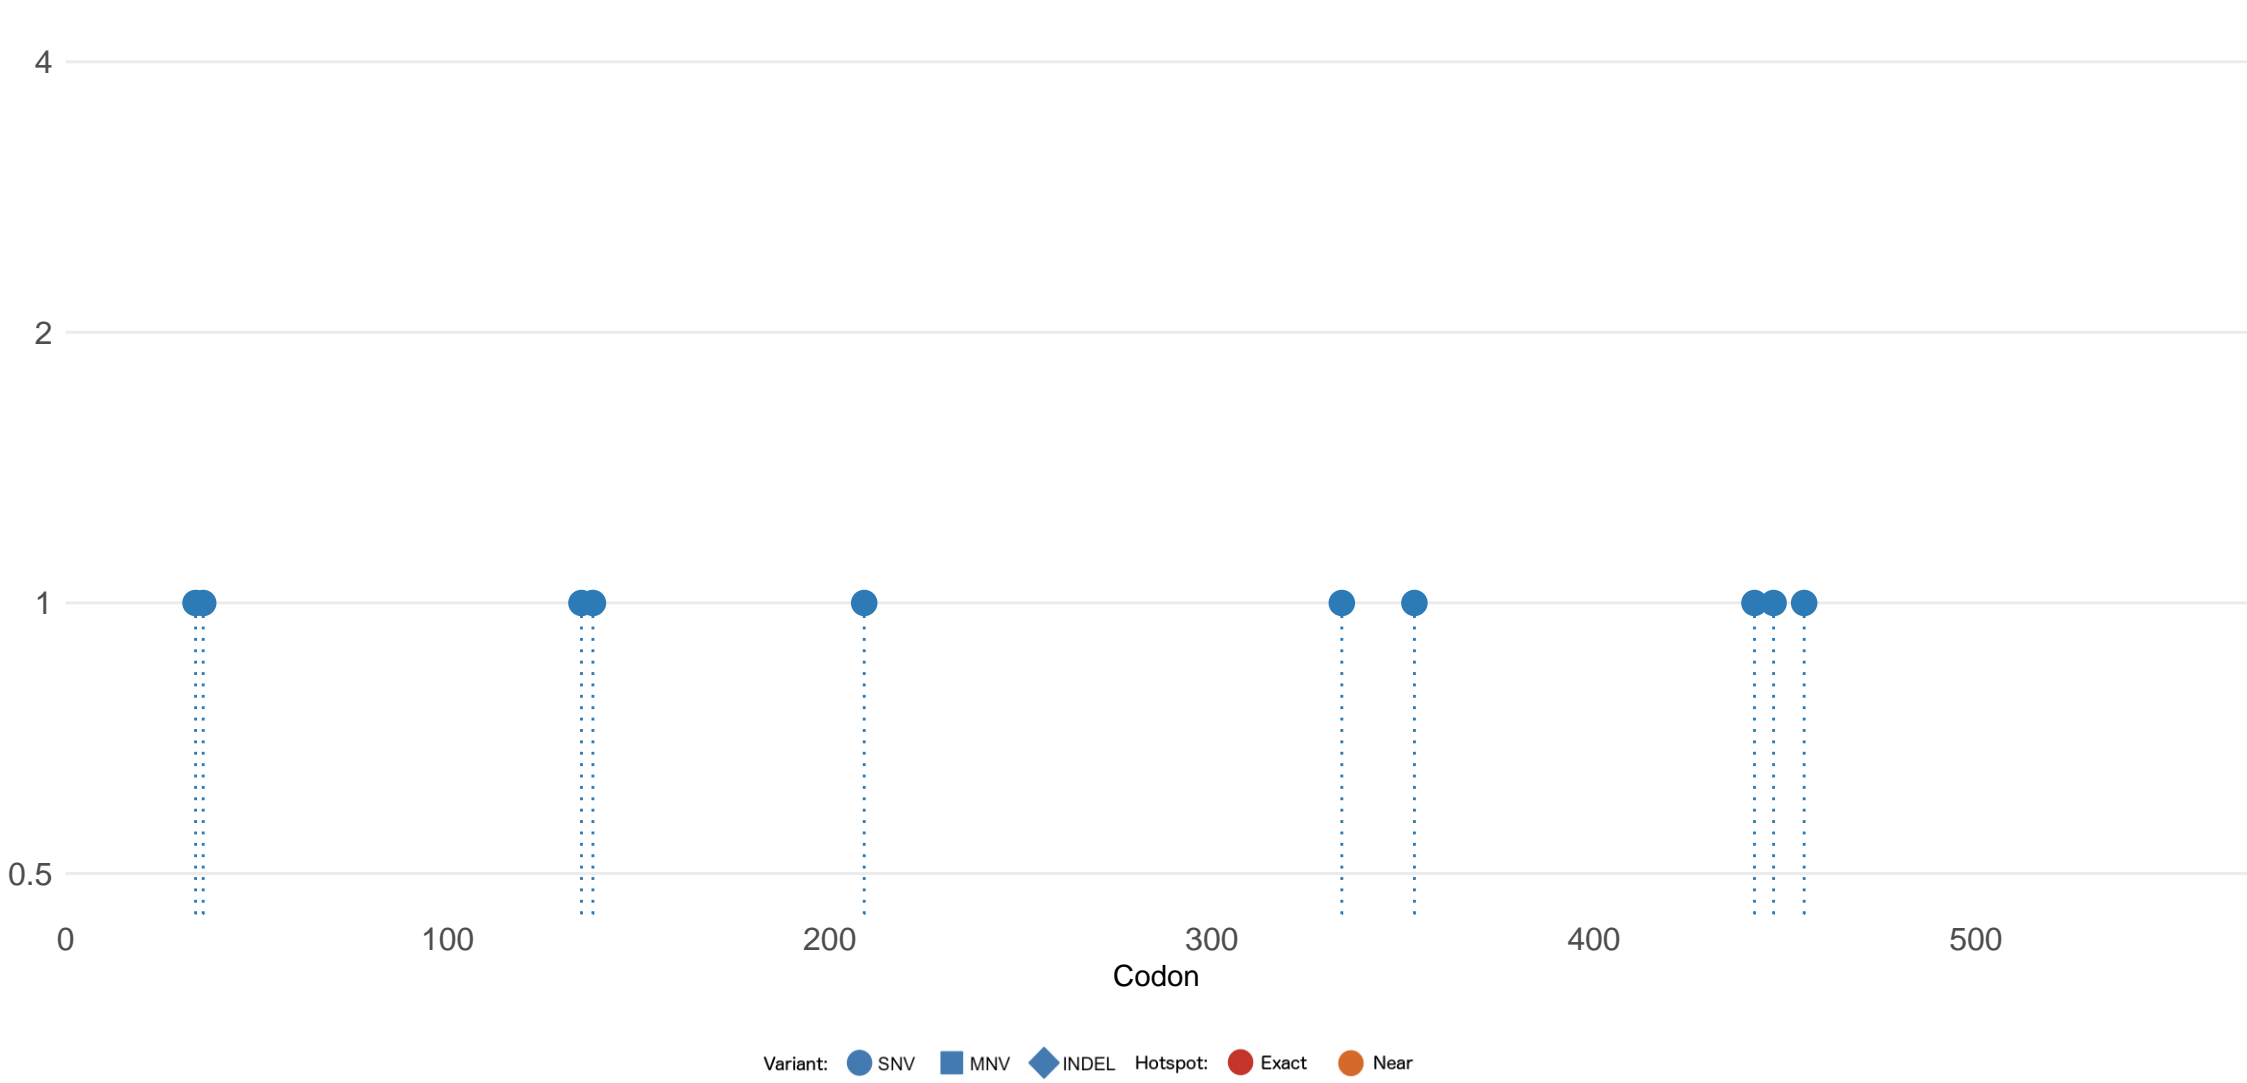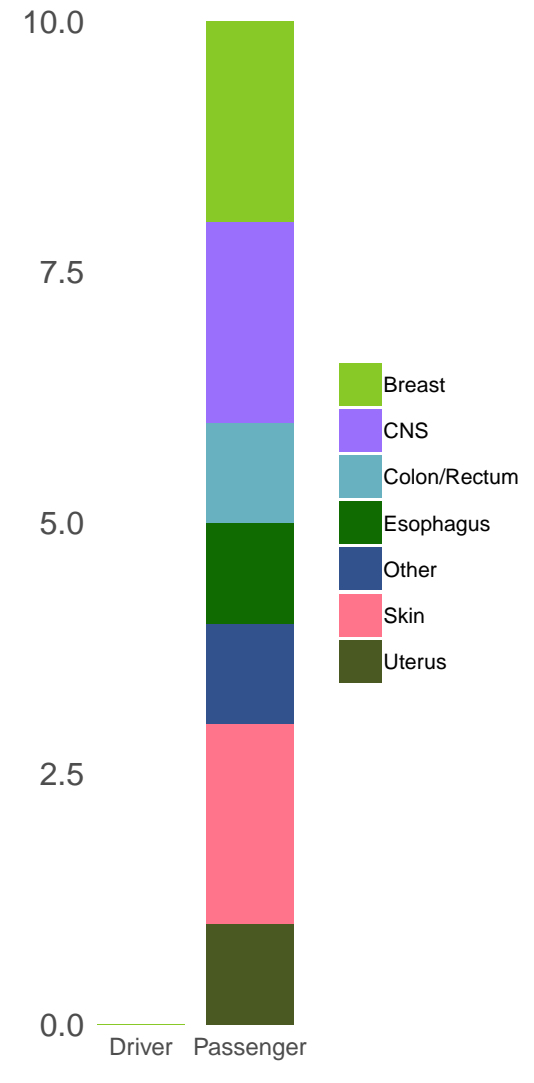

# NTRK3 Variants

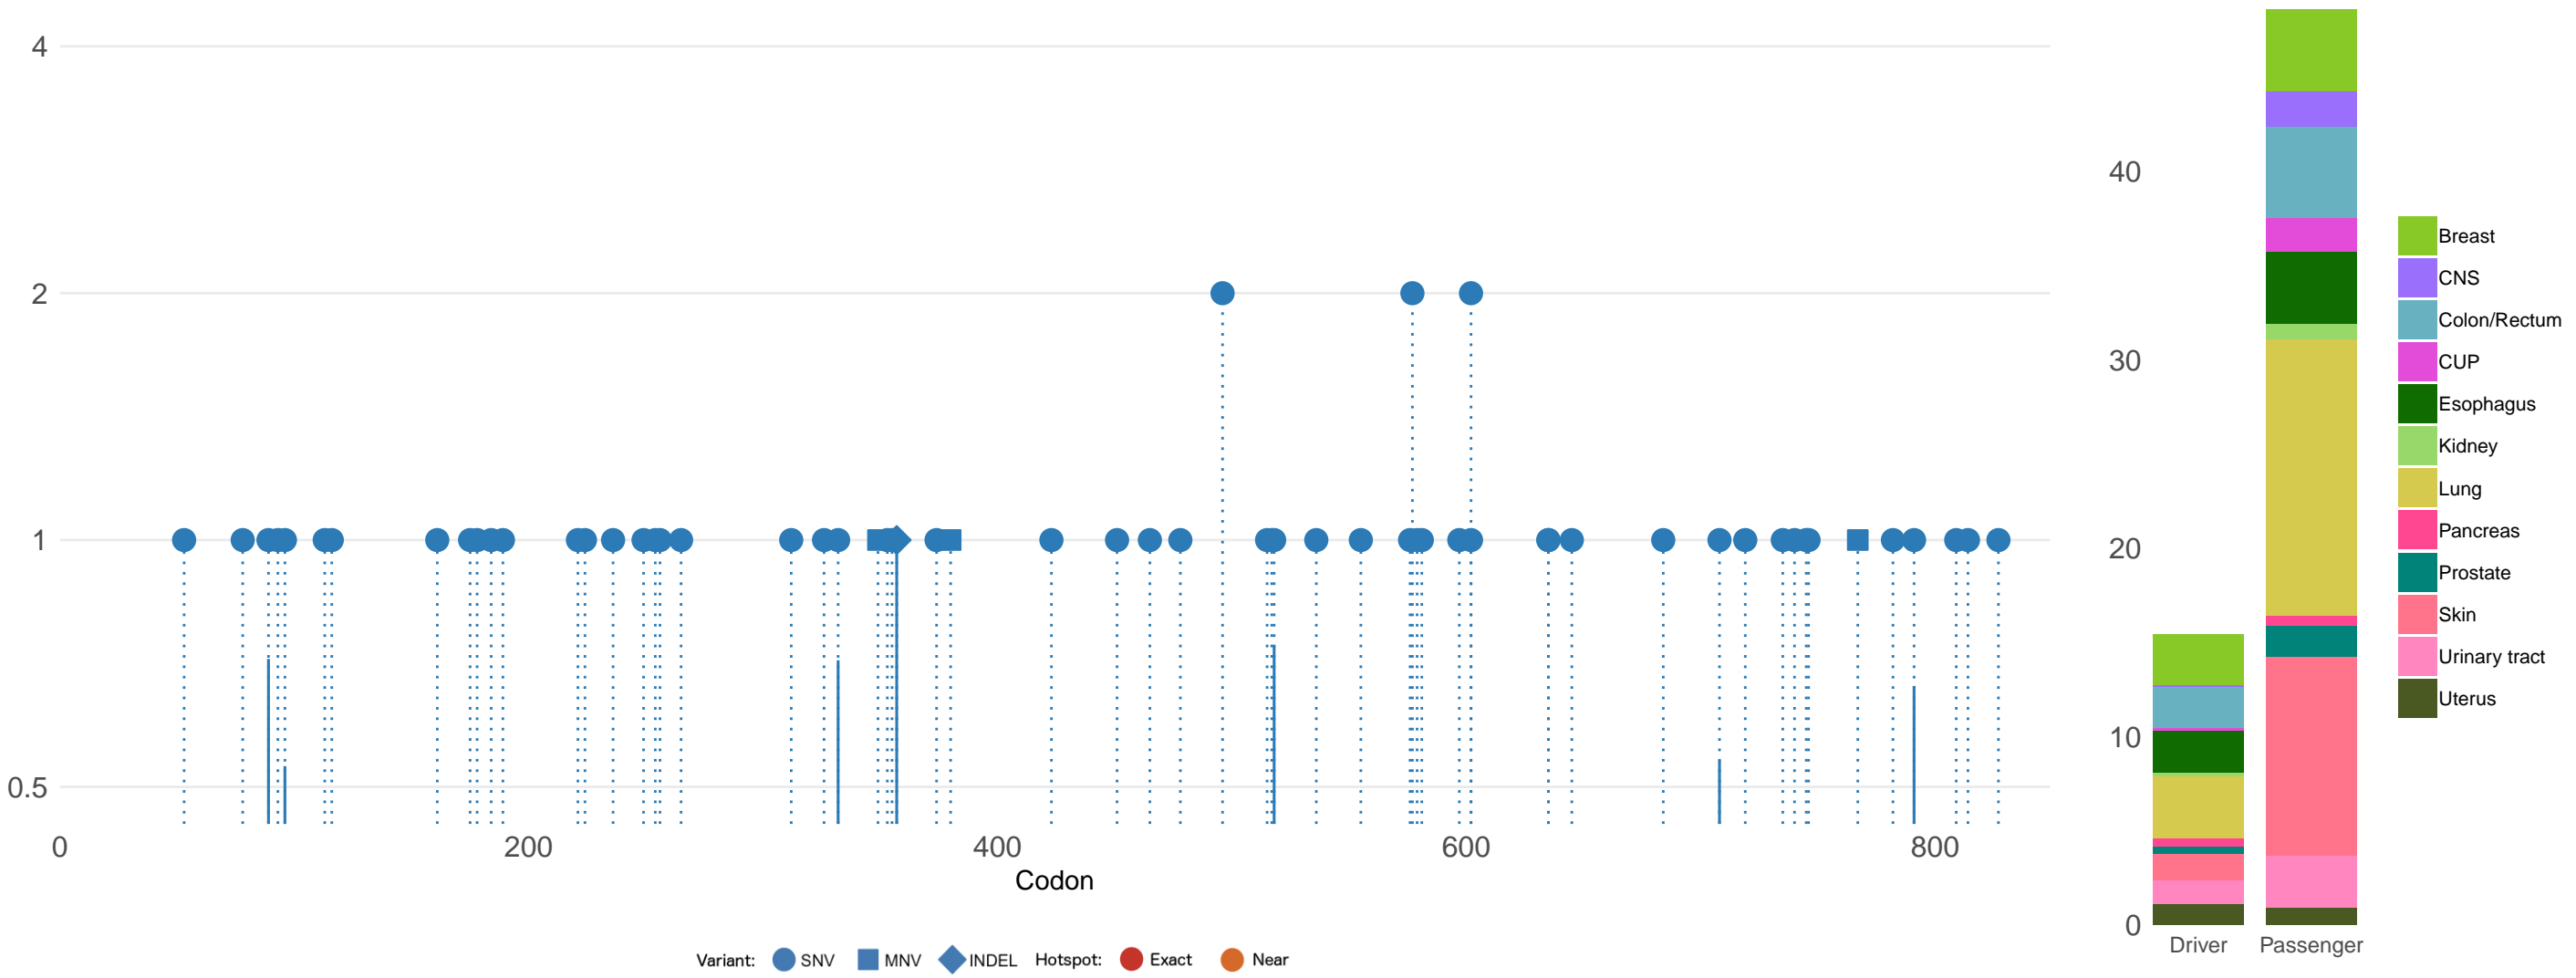

# OR11H1 Variants

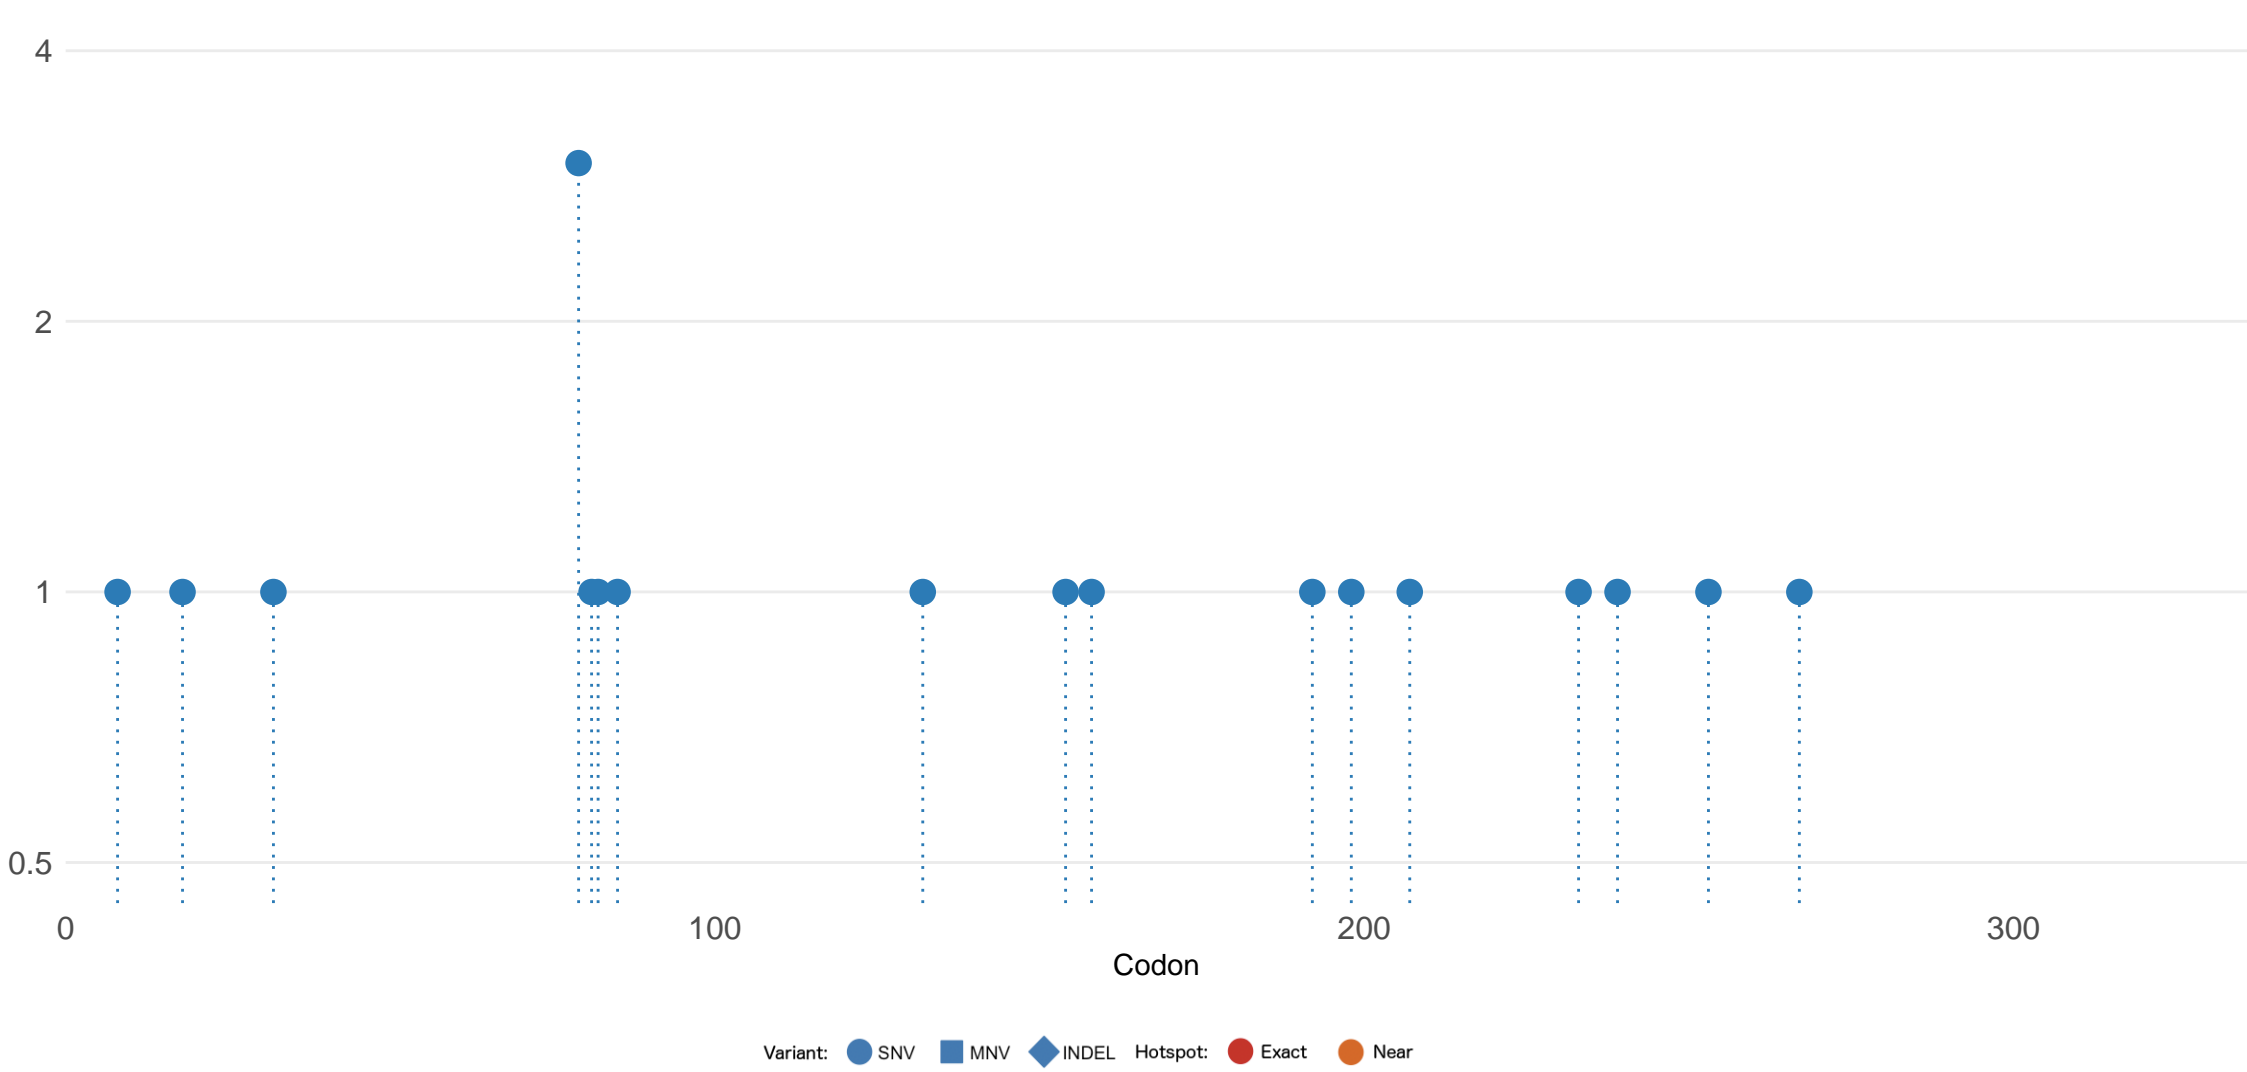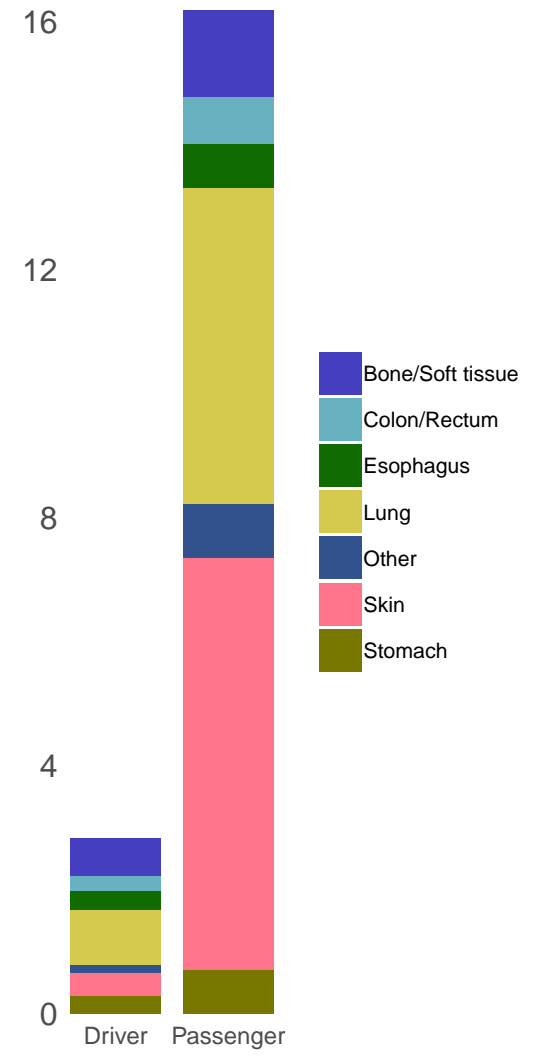

# PAX5 Variants

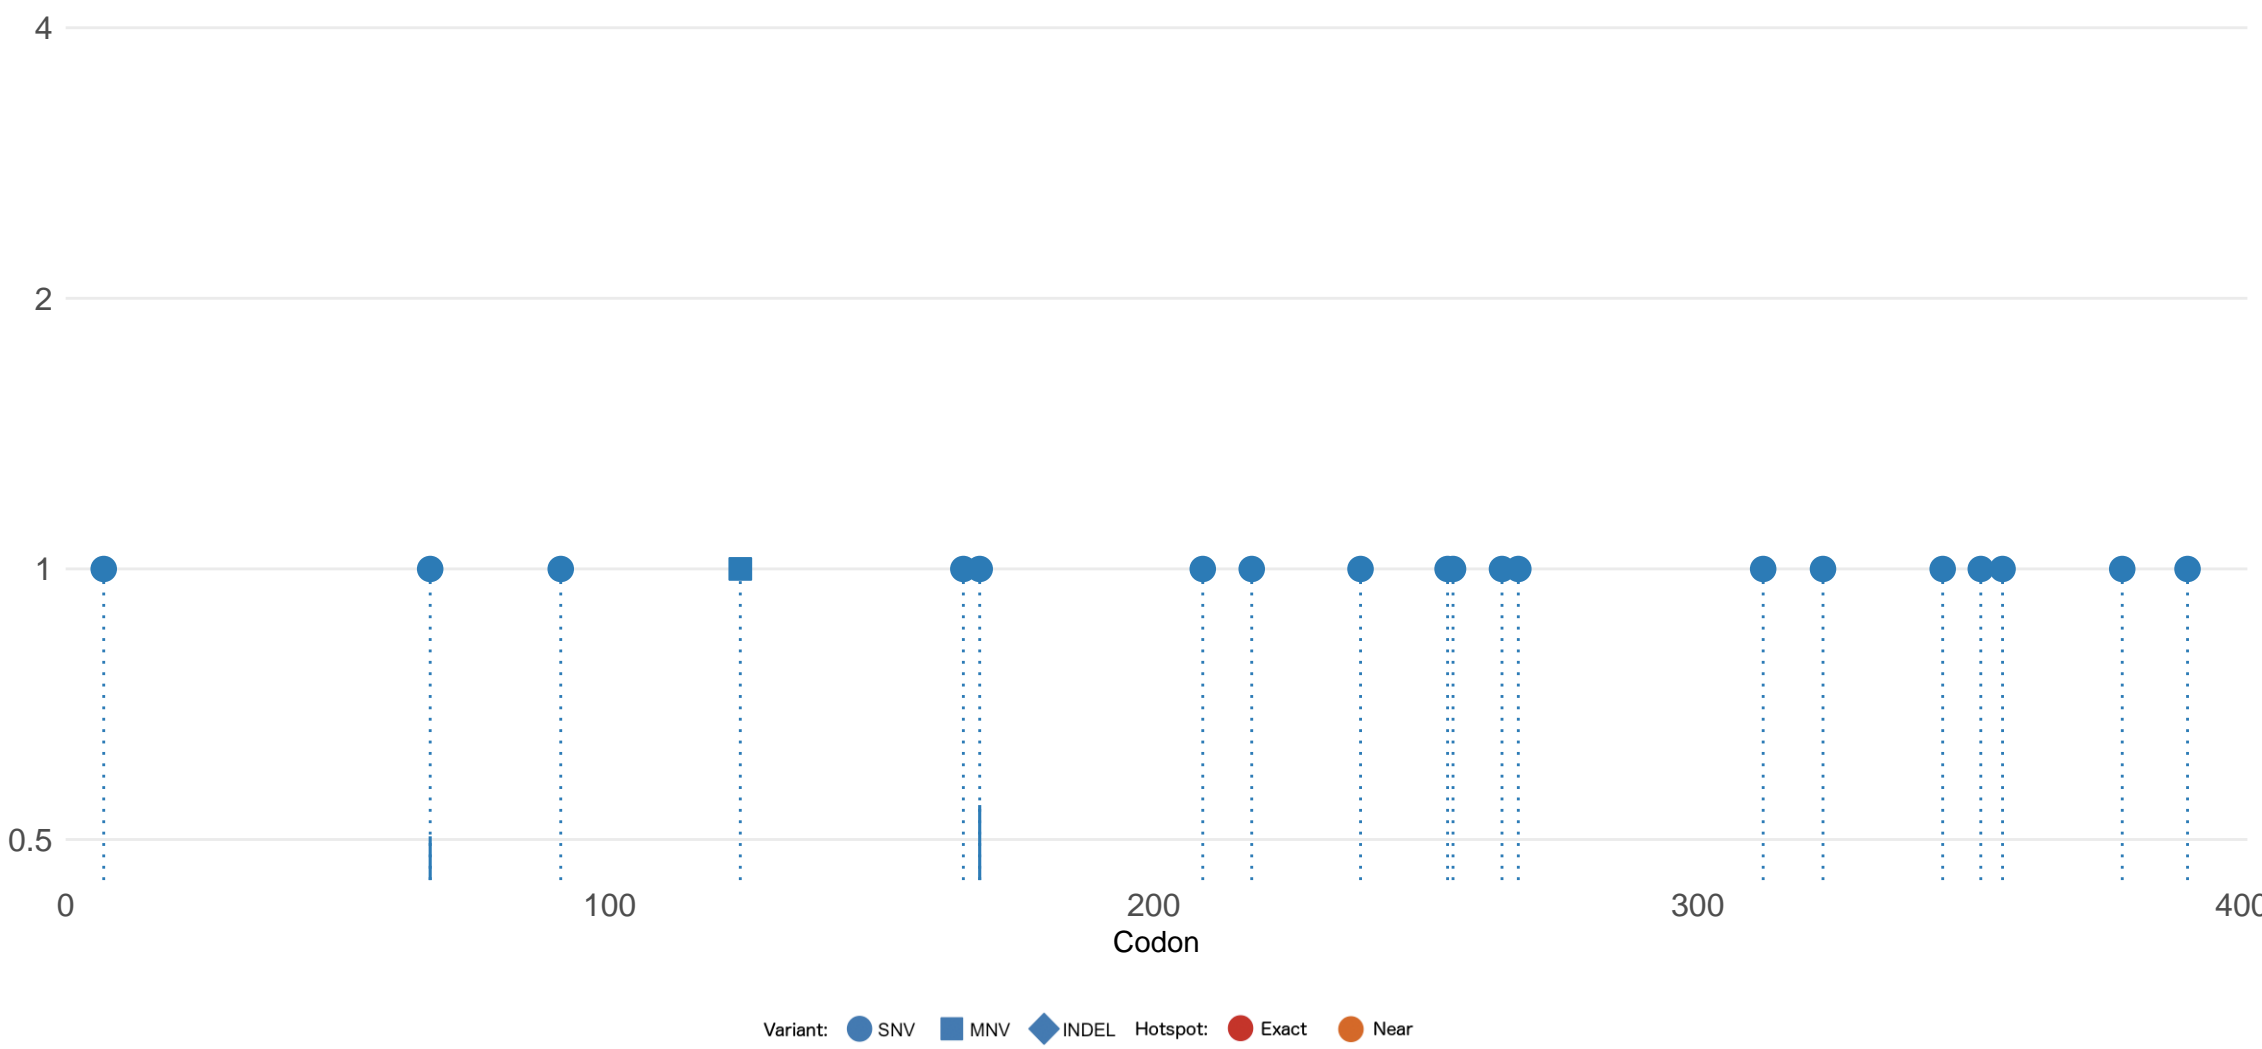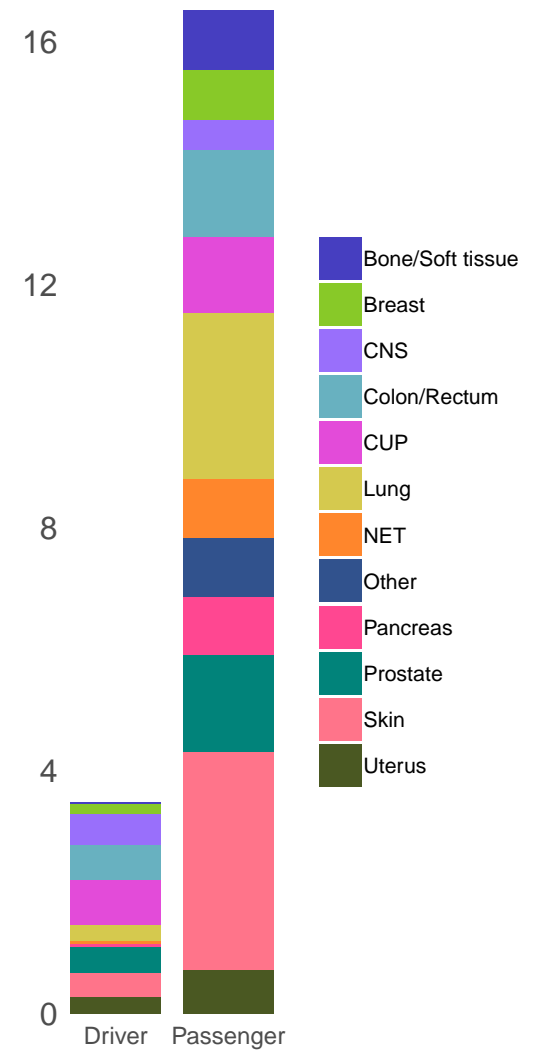

# PDGFRA Variants

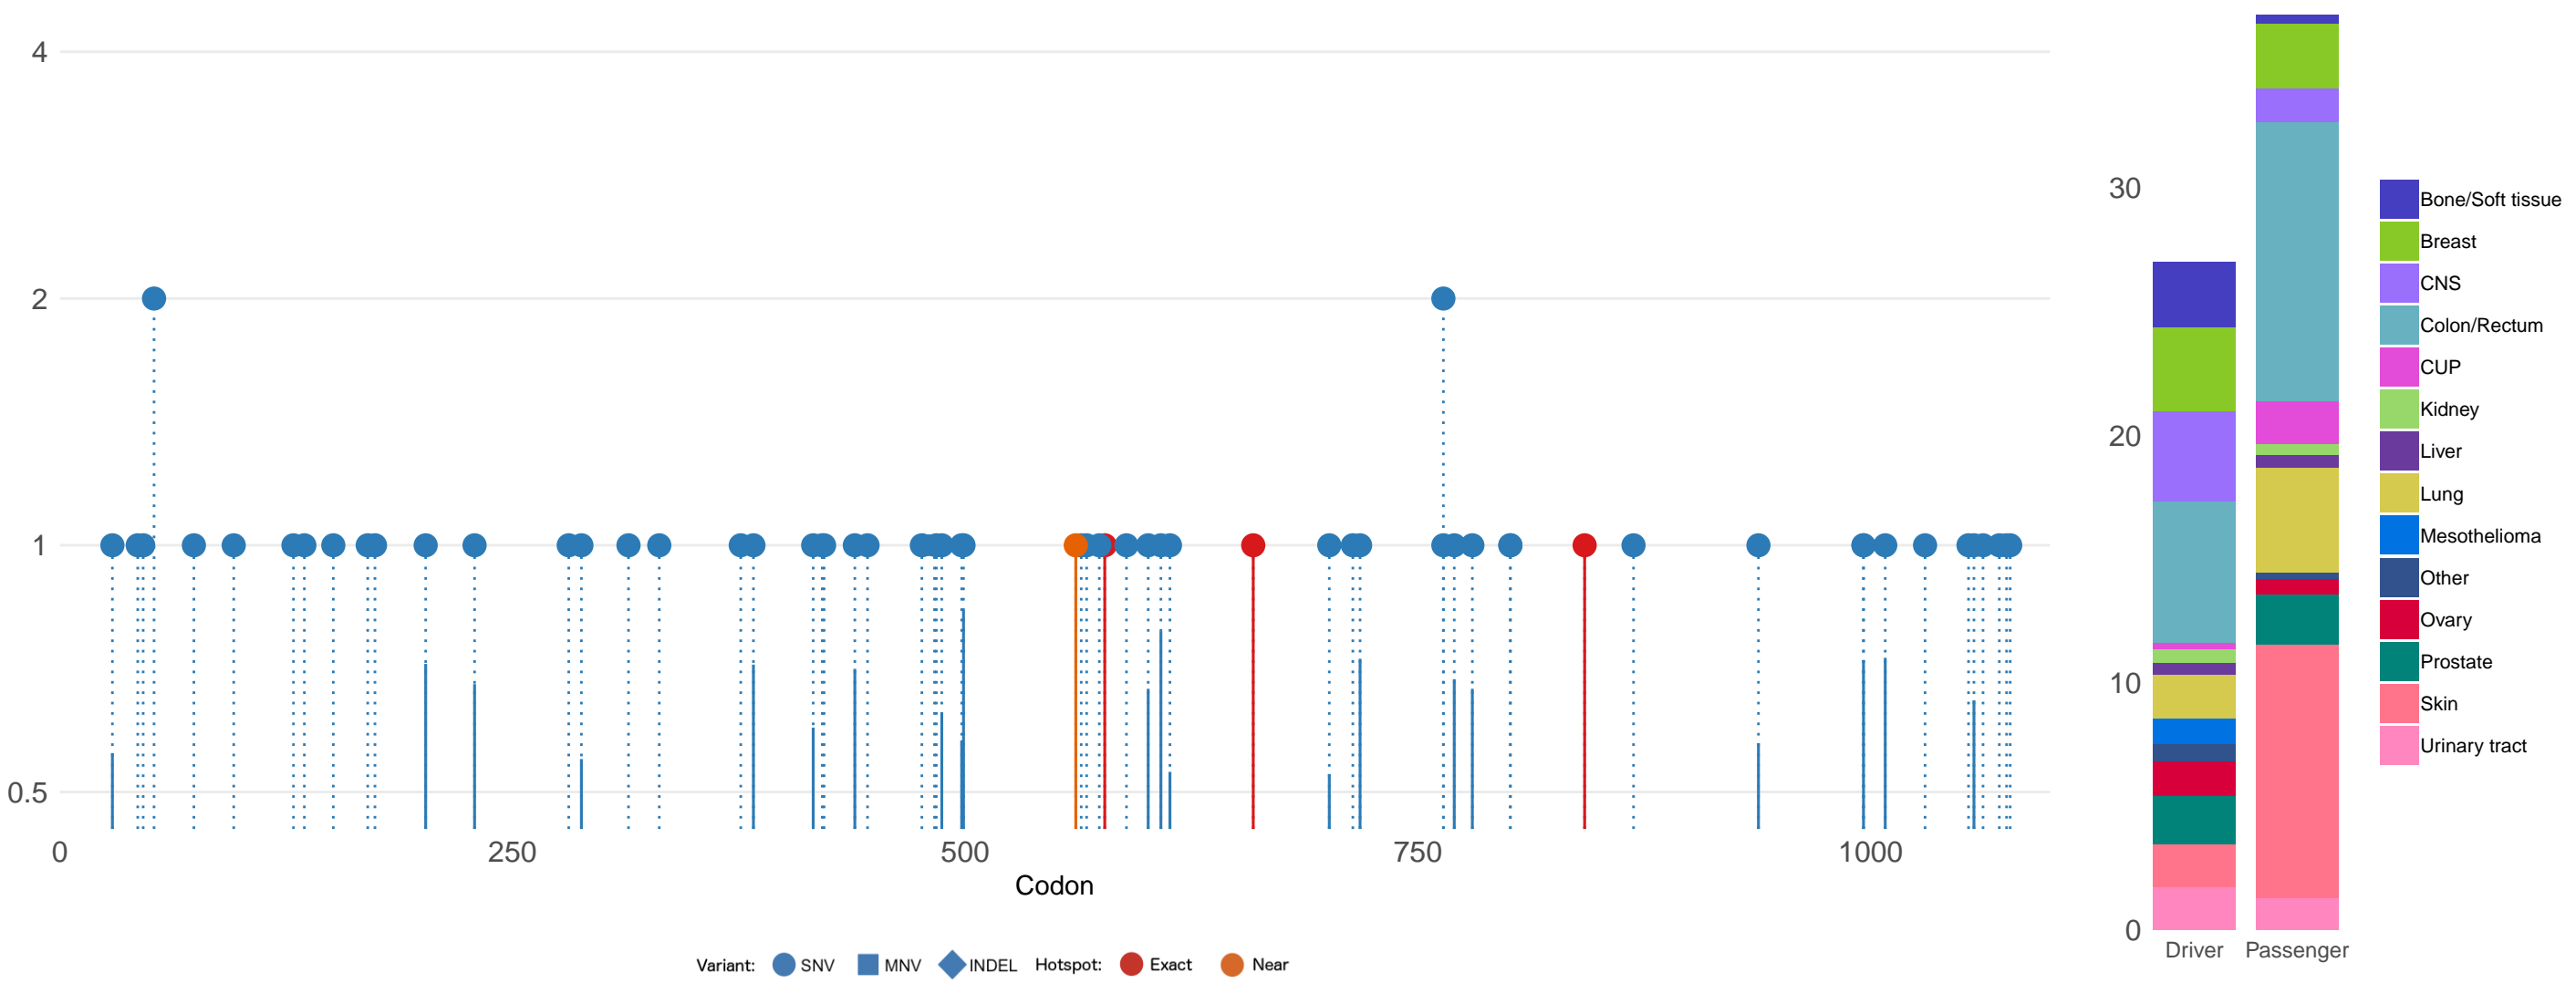

# PDYN Variants

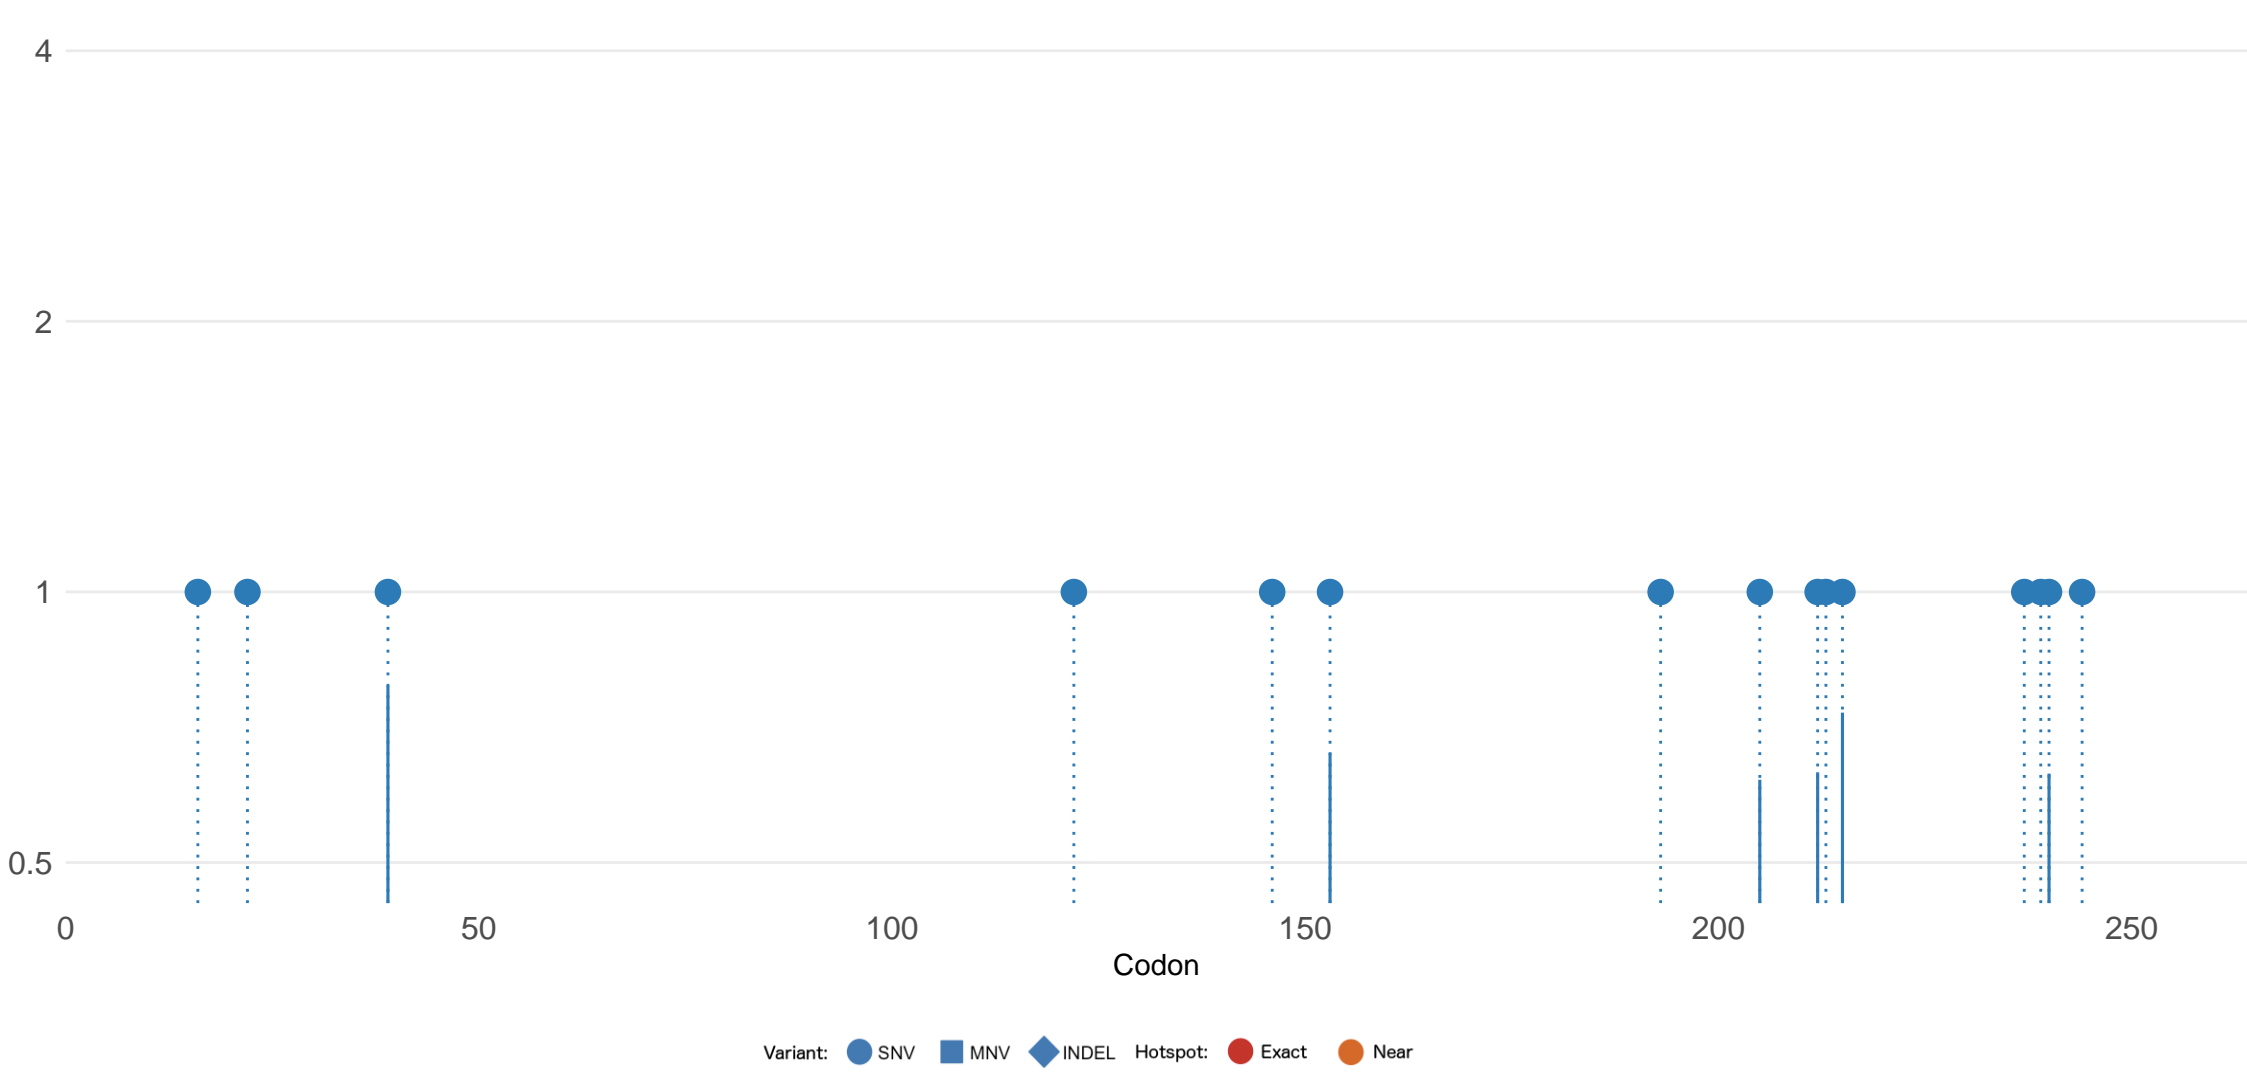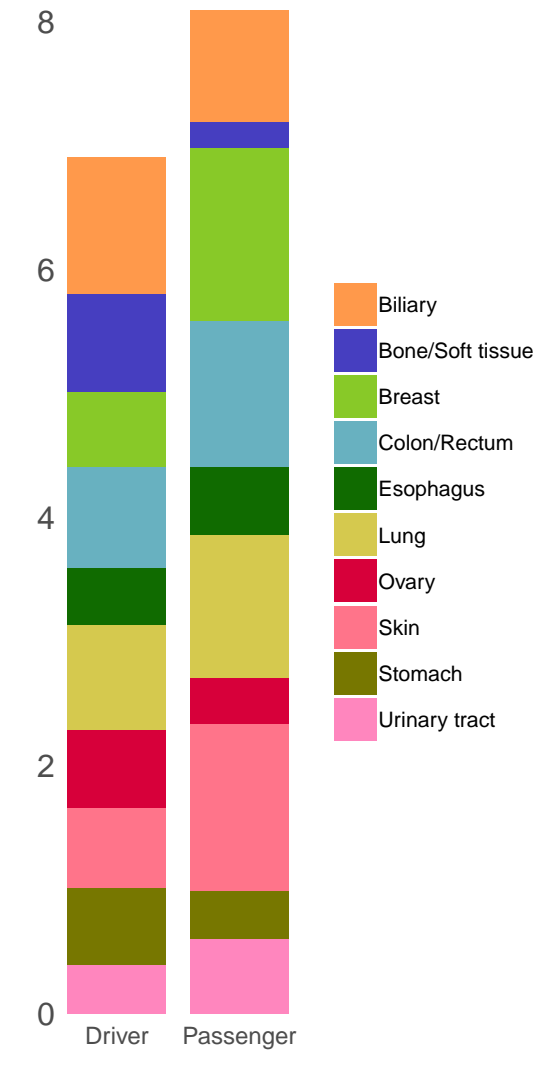



# PIK3CA Variants

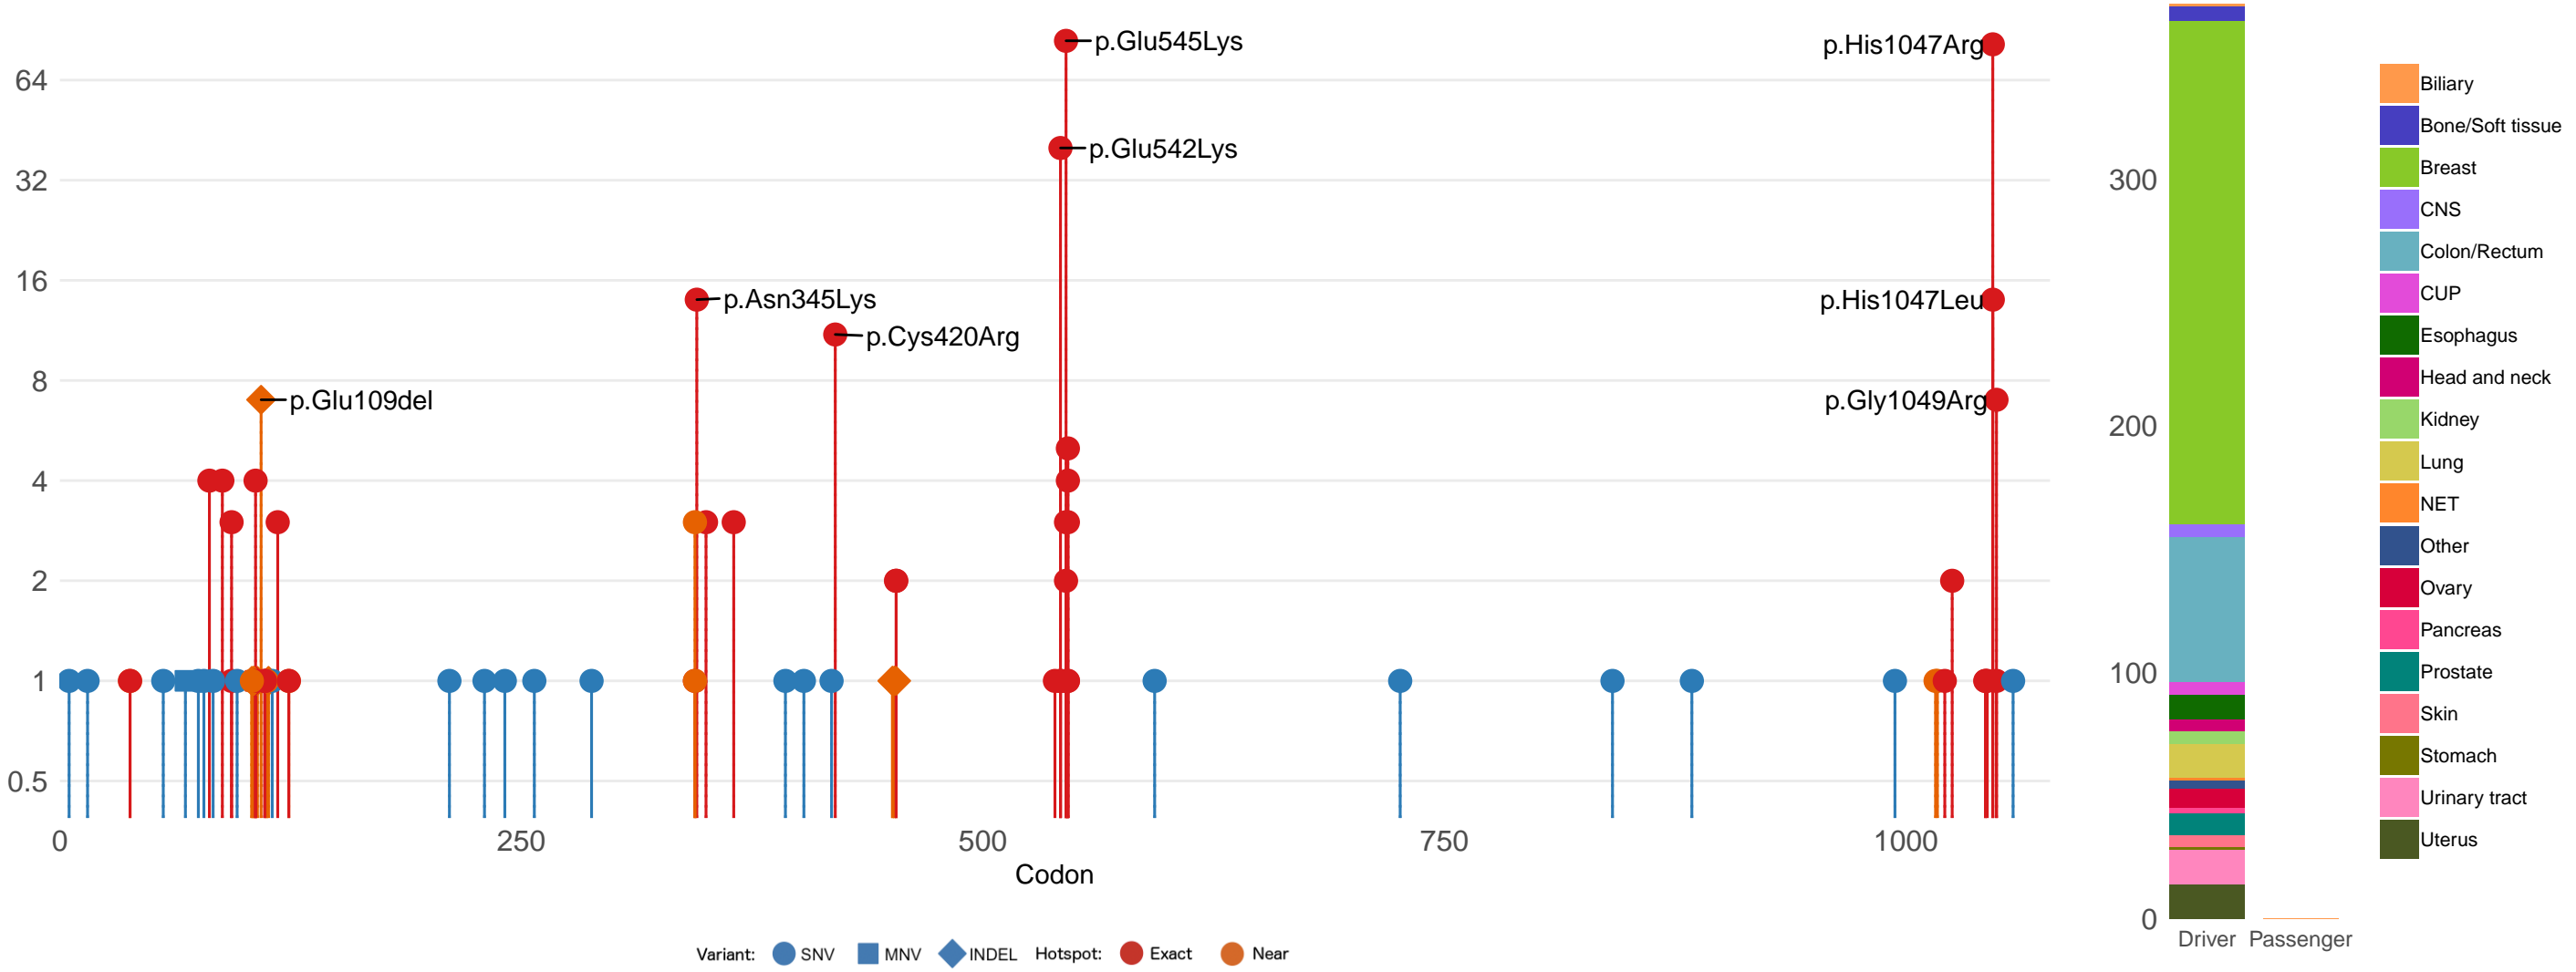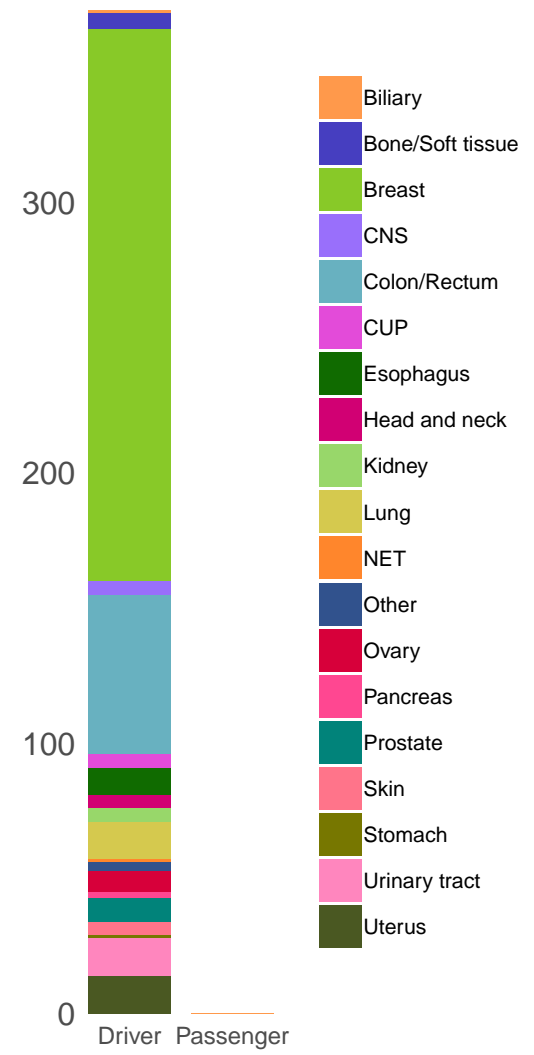

# PLCG1 Variants

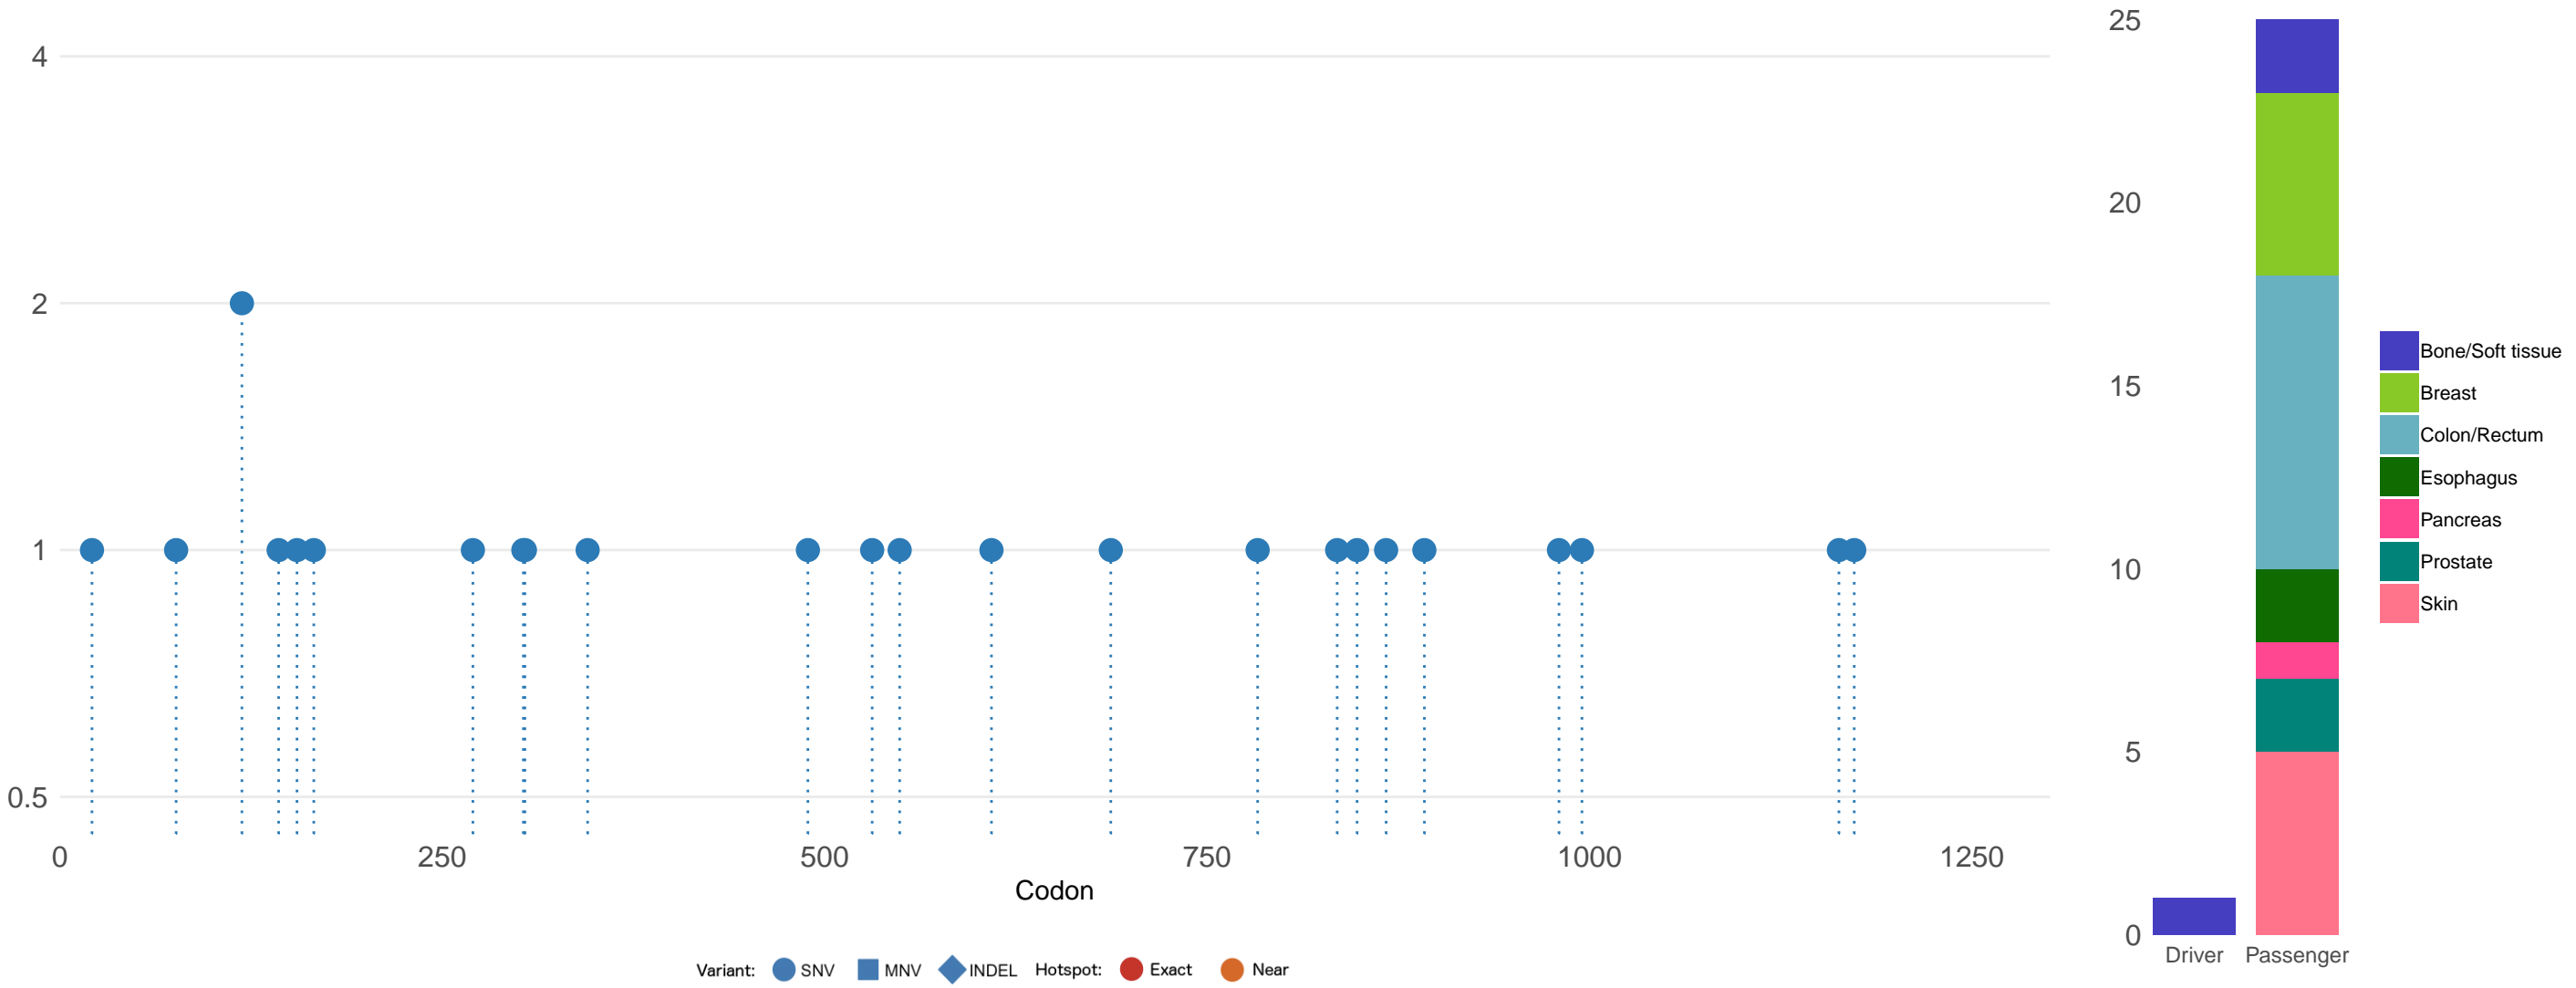

# PPP2R1A Variants

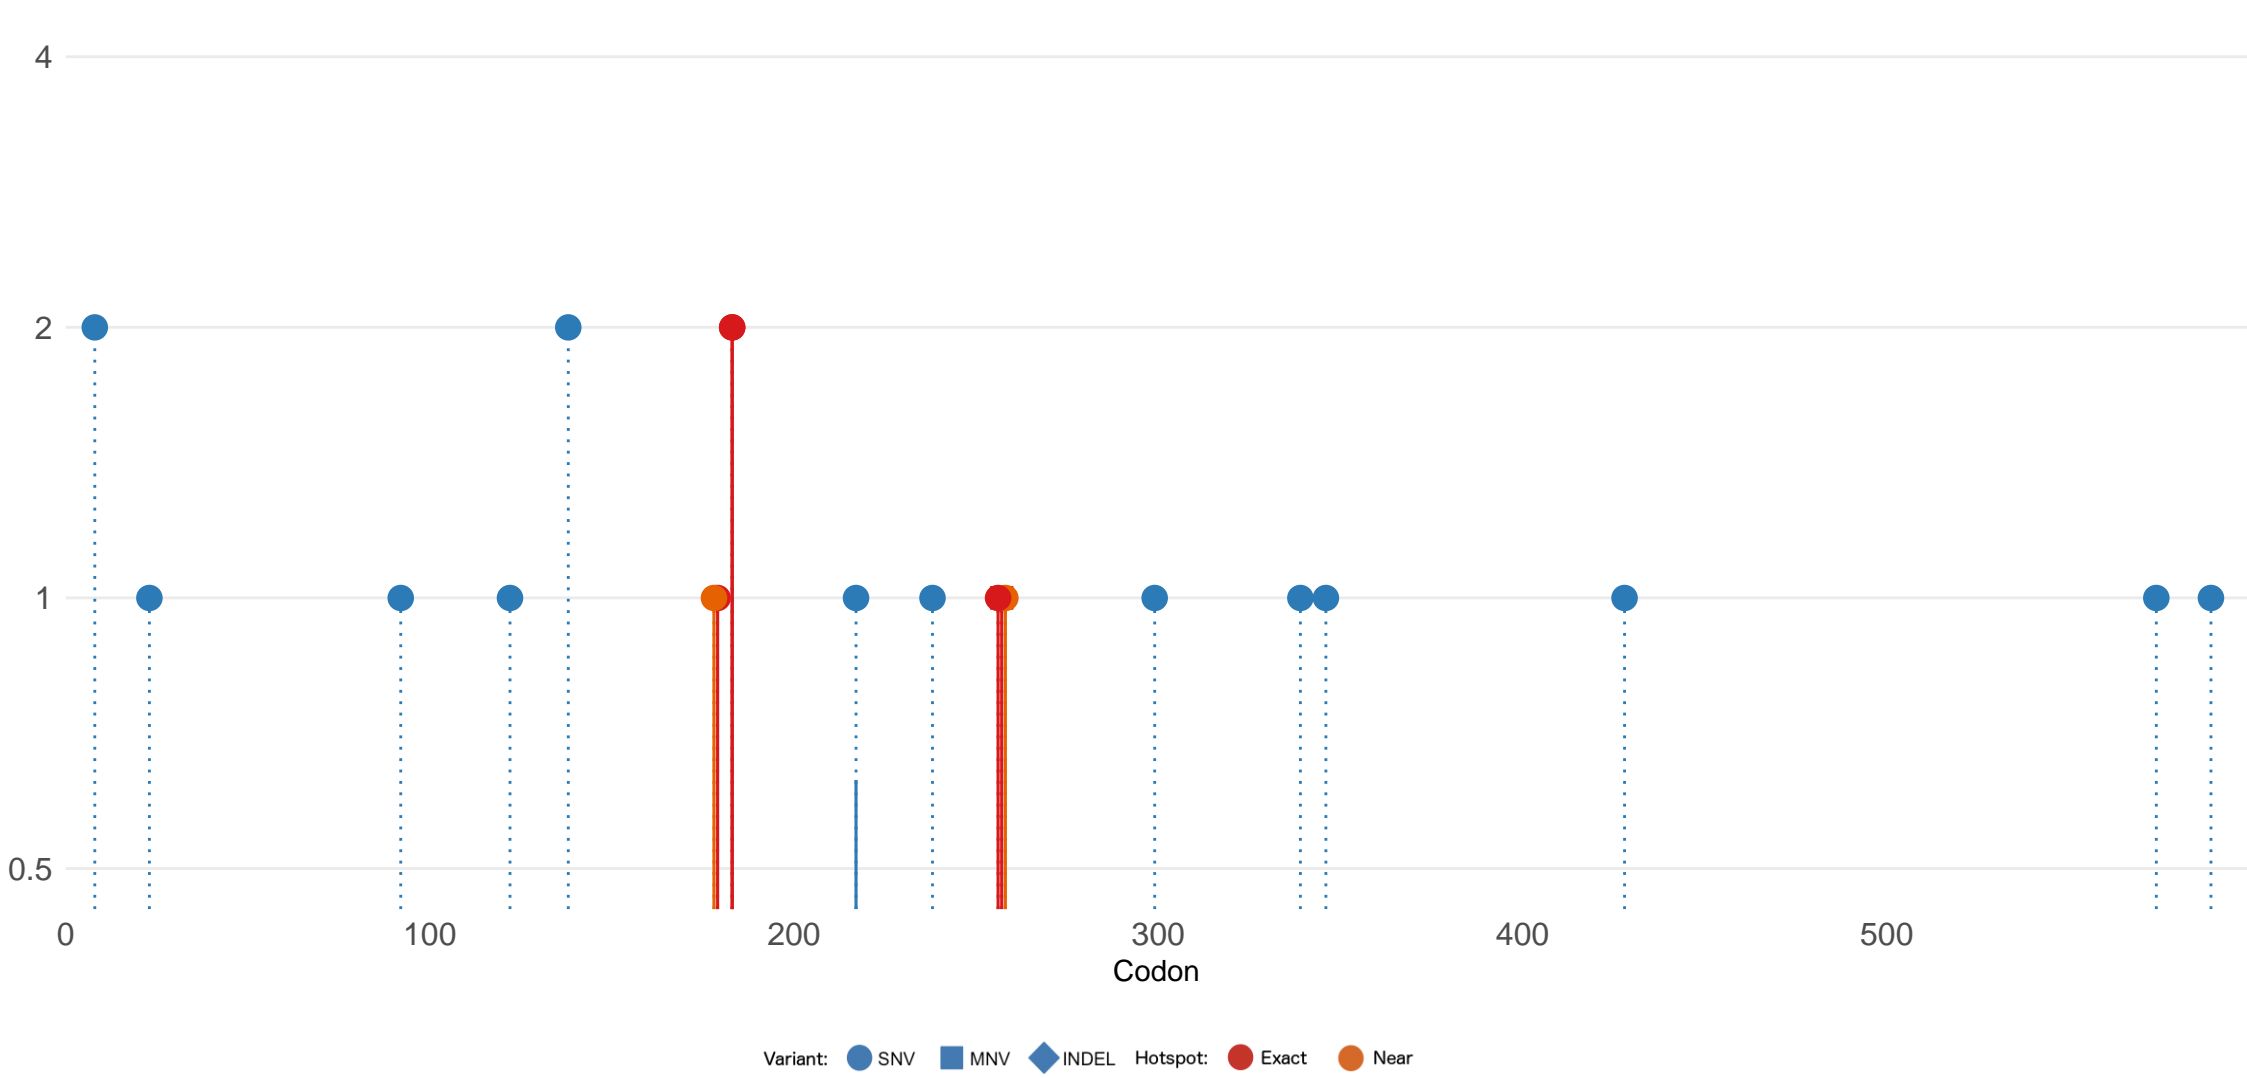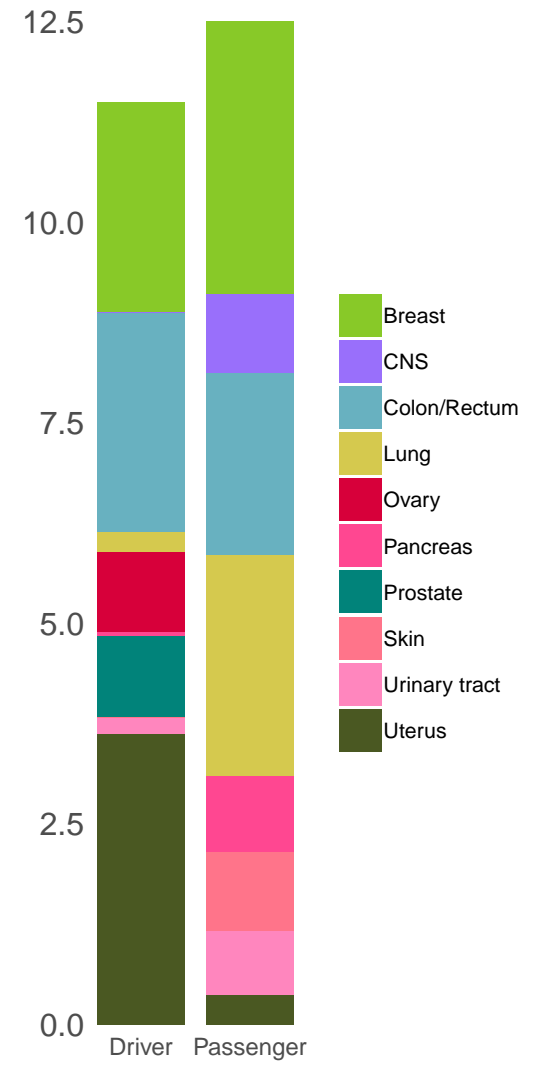

# PREX2 Variants

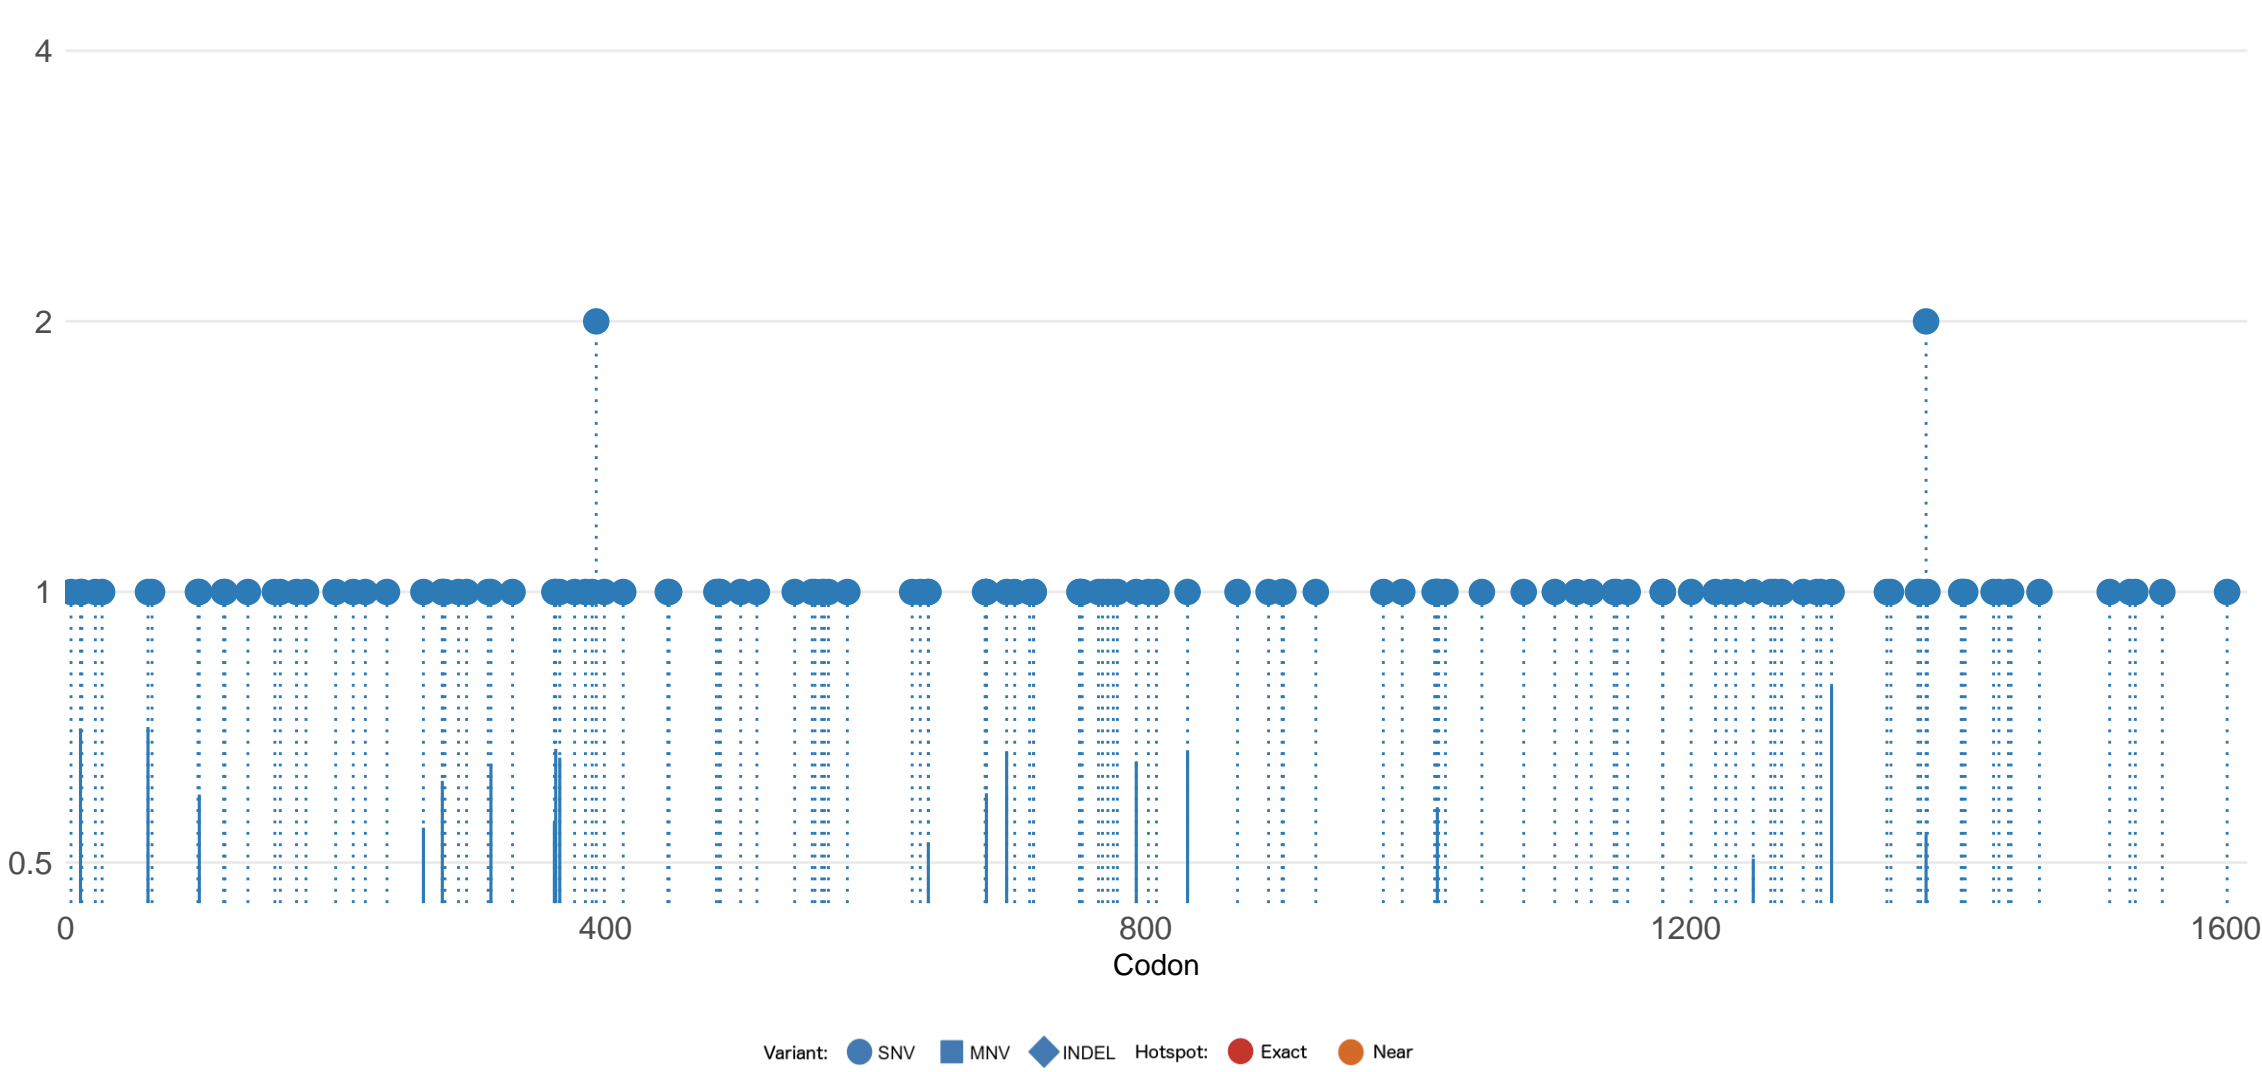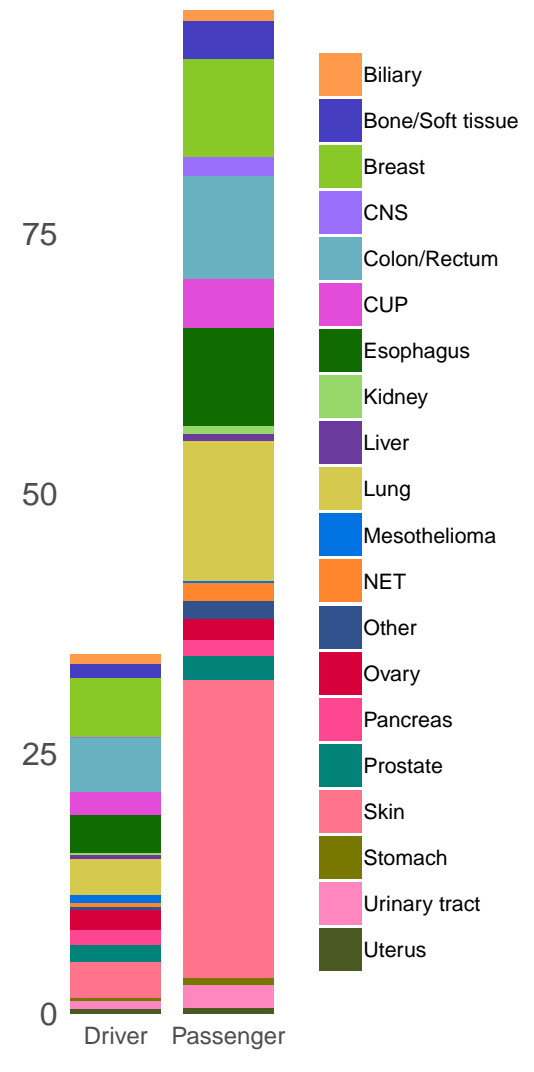

# PRKACA Variants

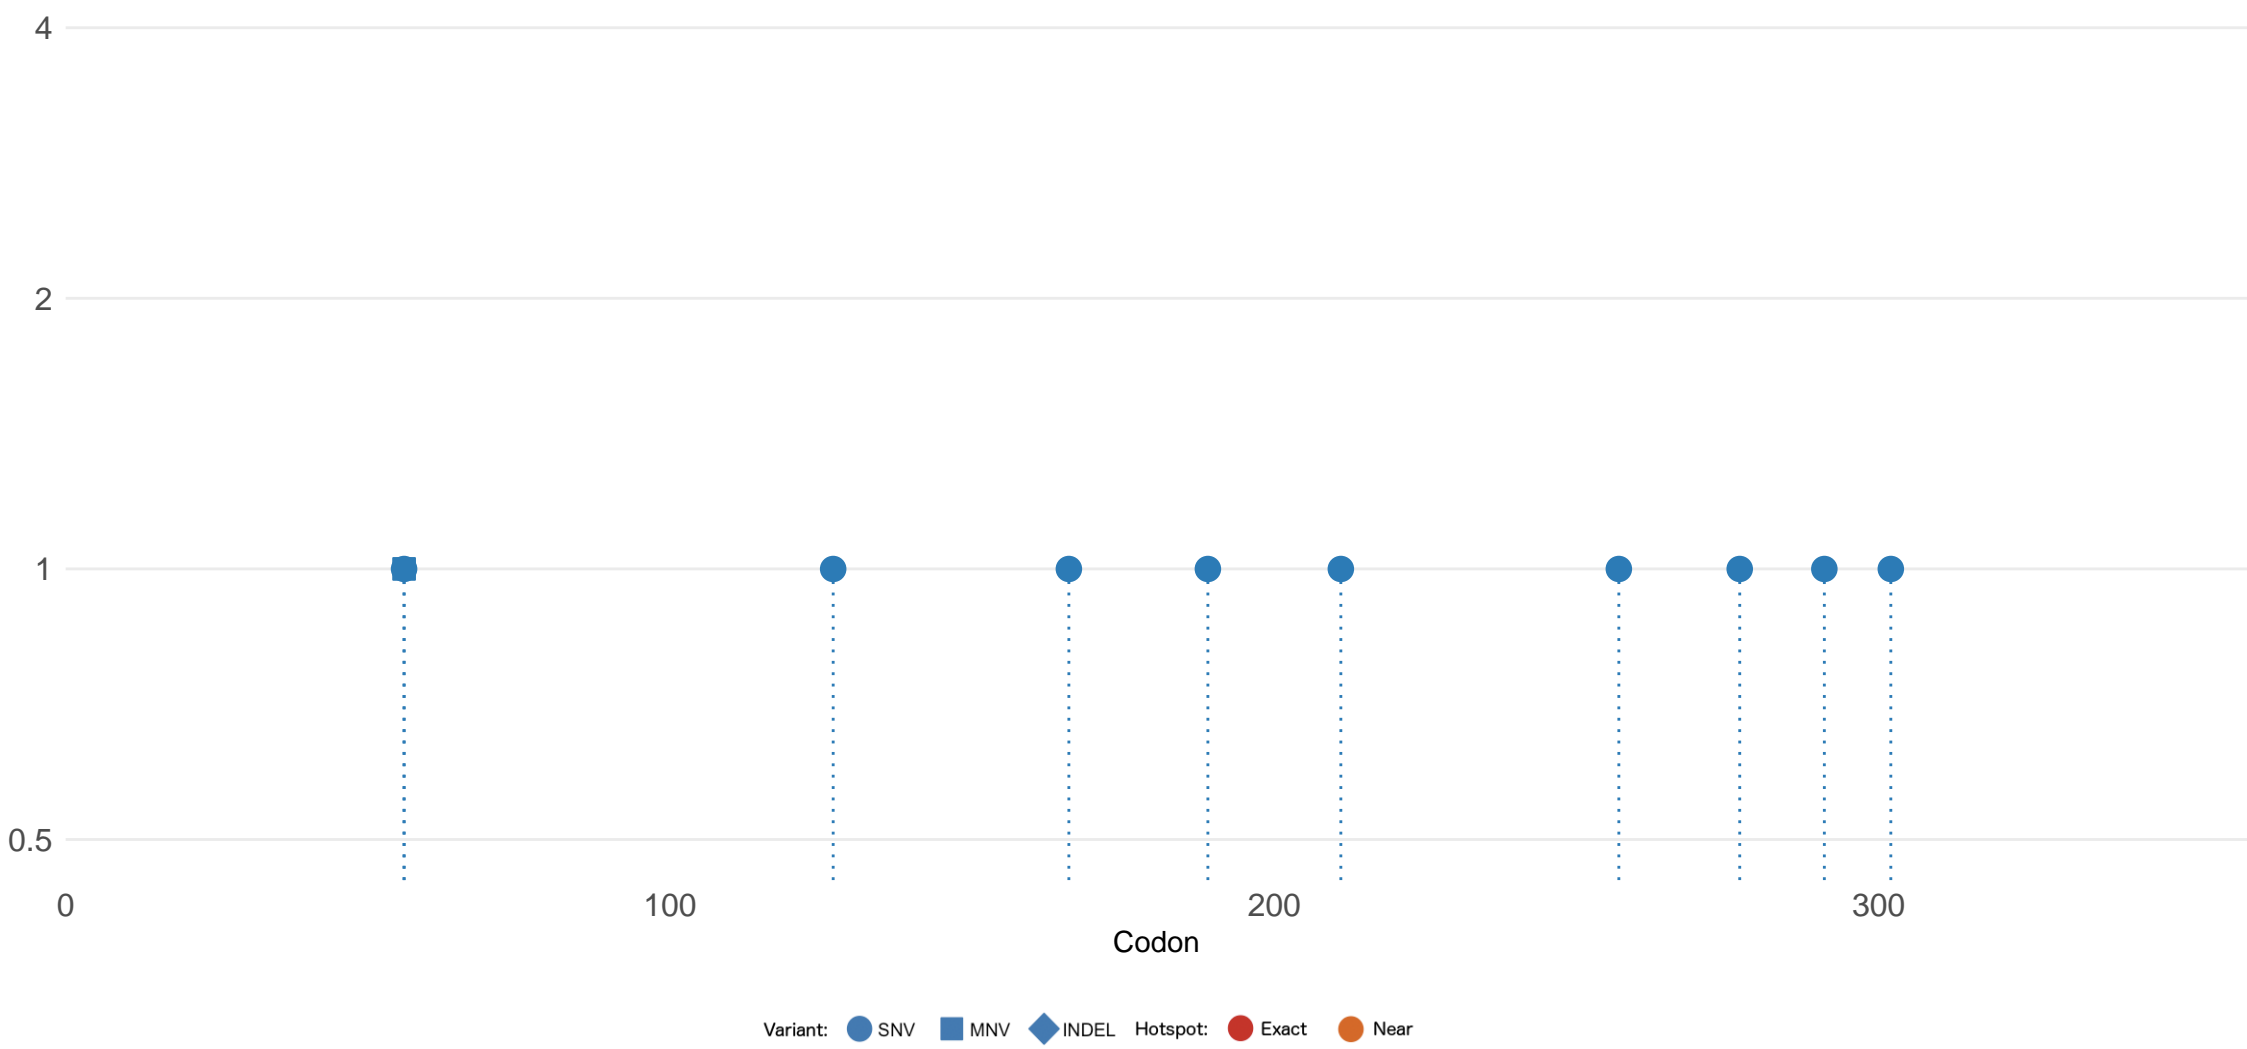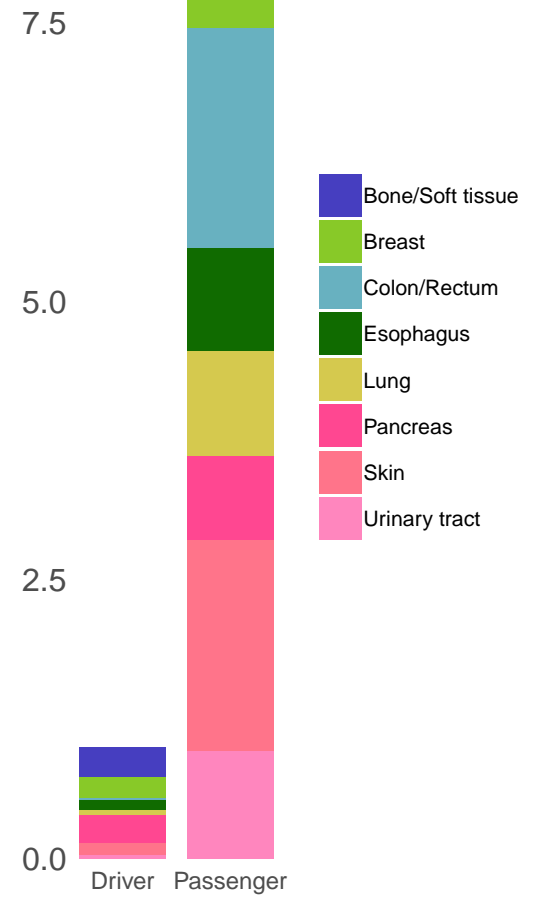

# PTPN11 Variants

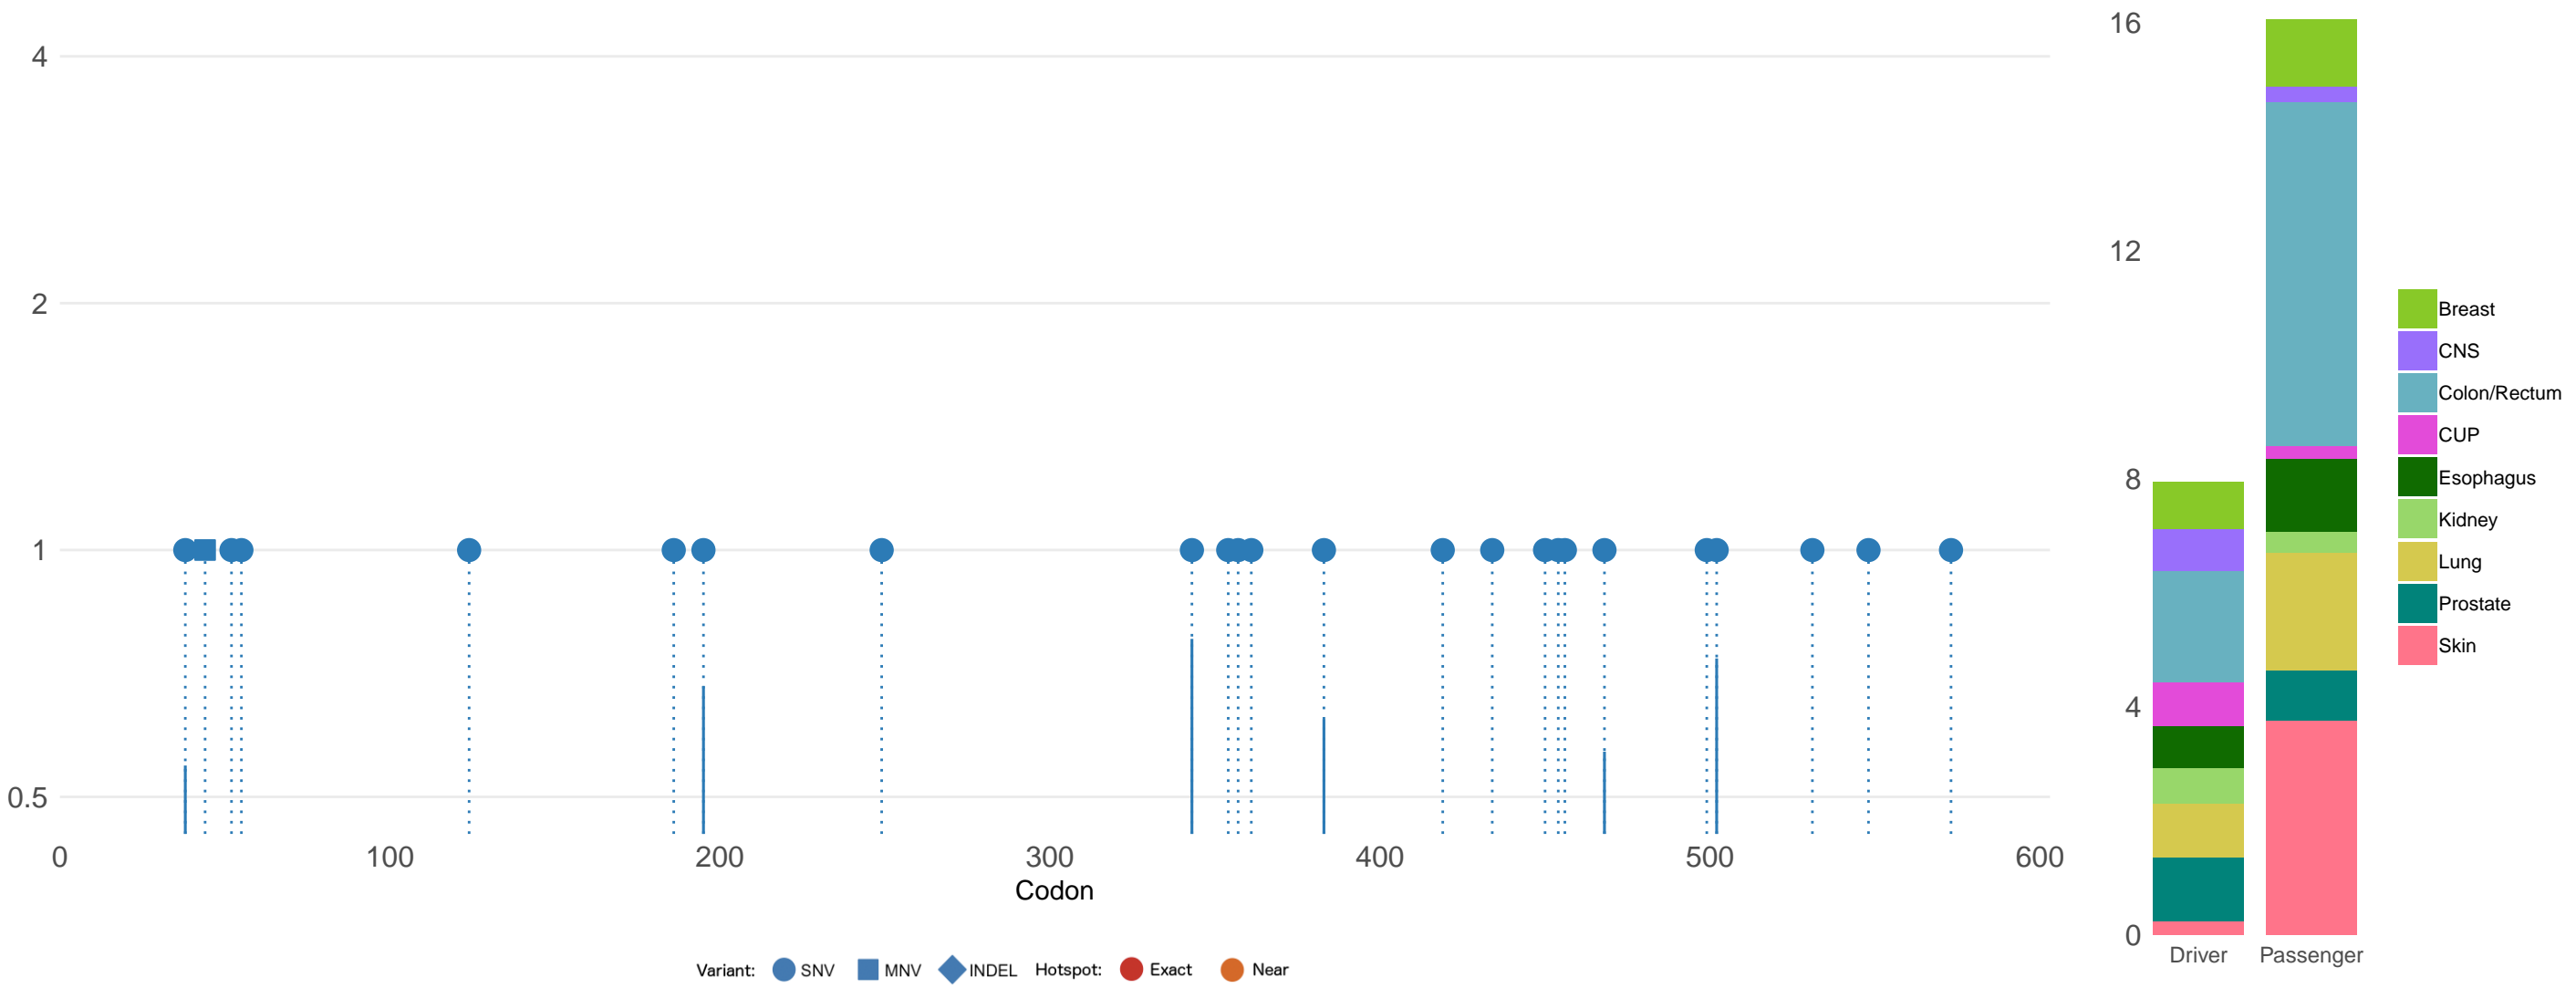

# RAC1 Variants

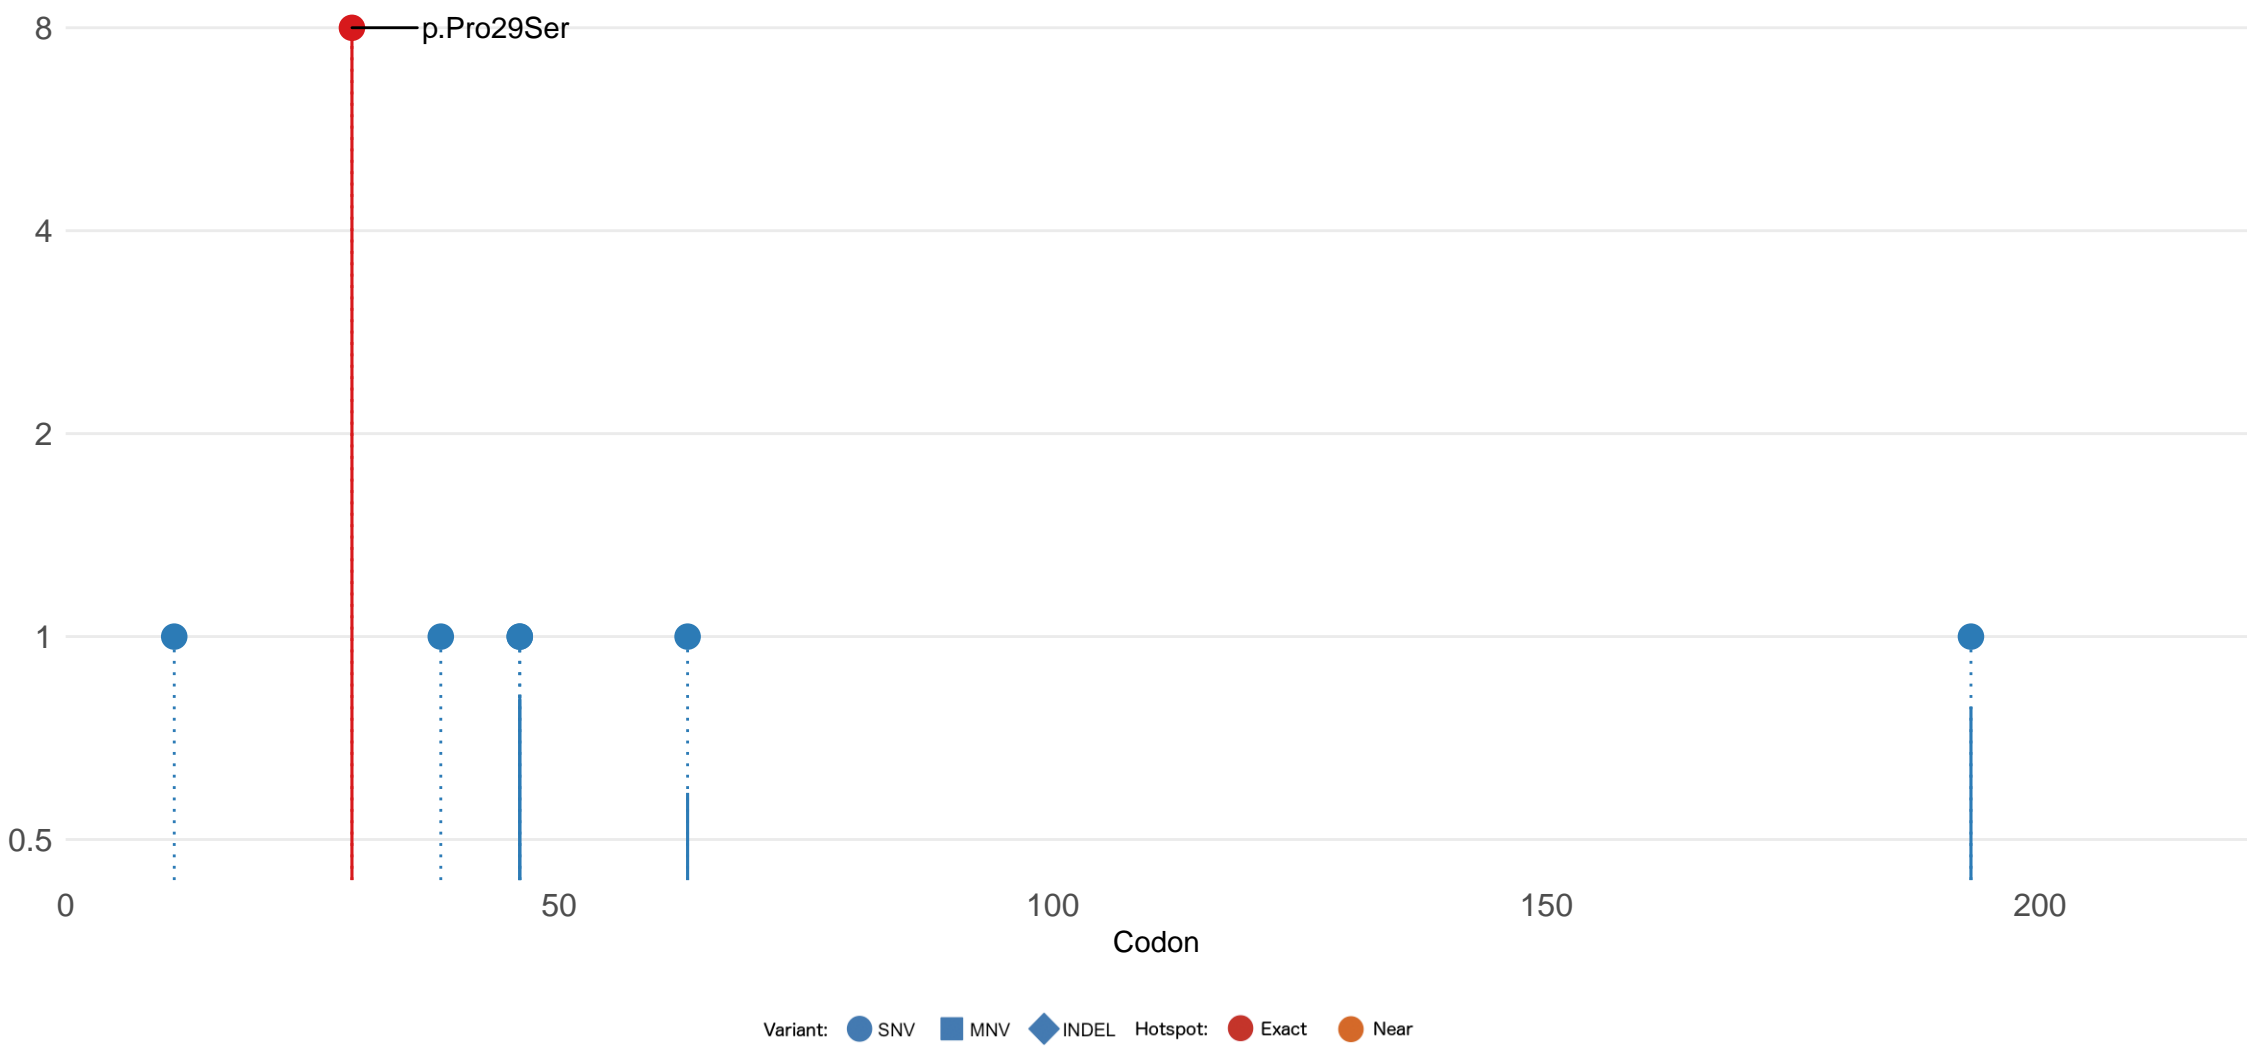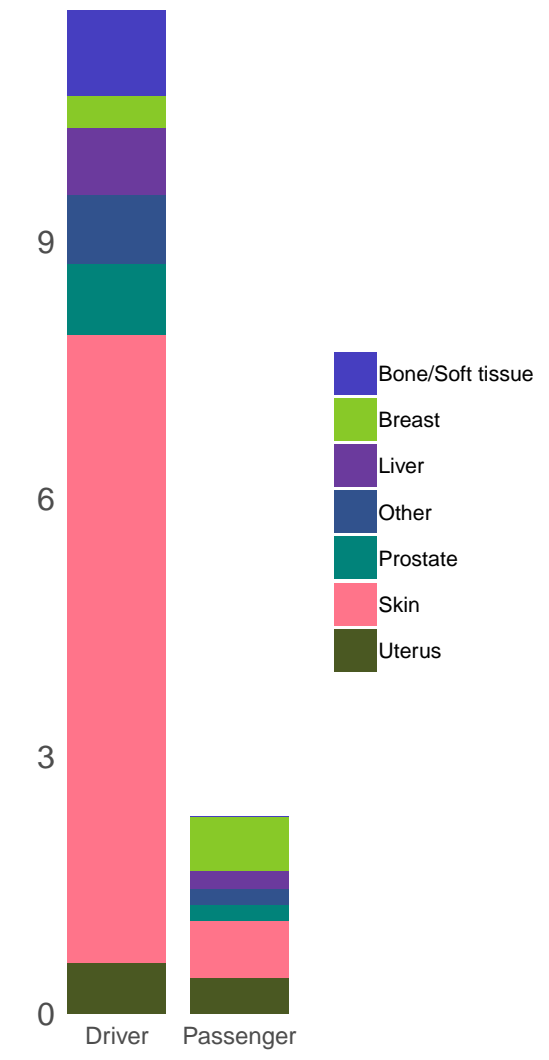

# RAD21 Variants

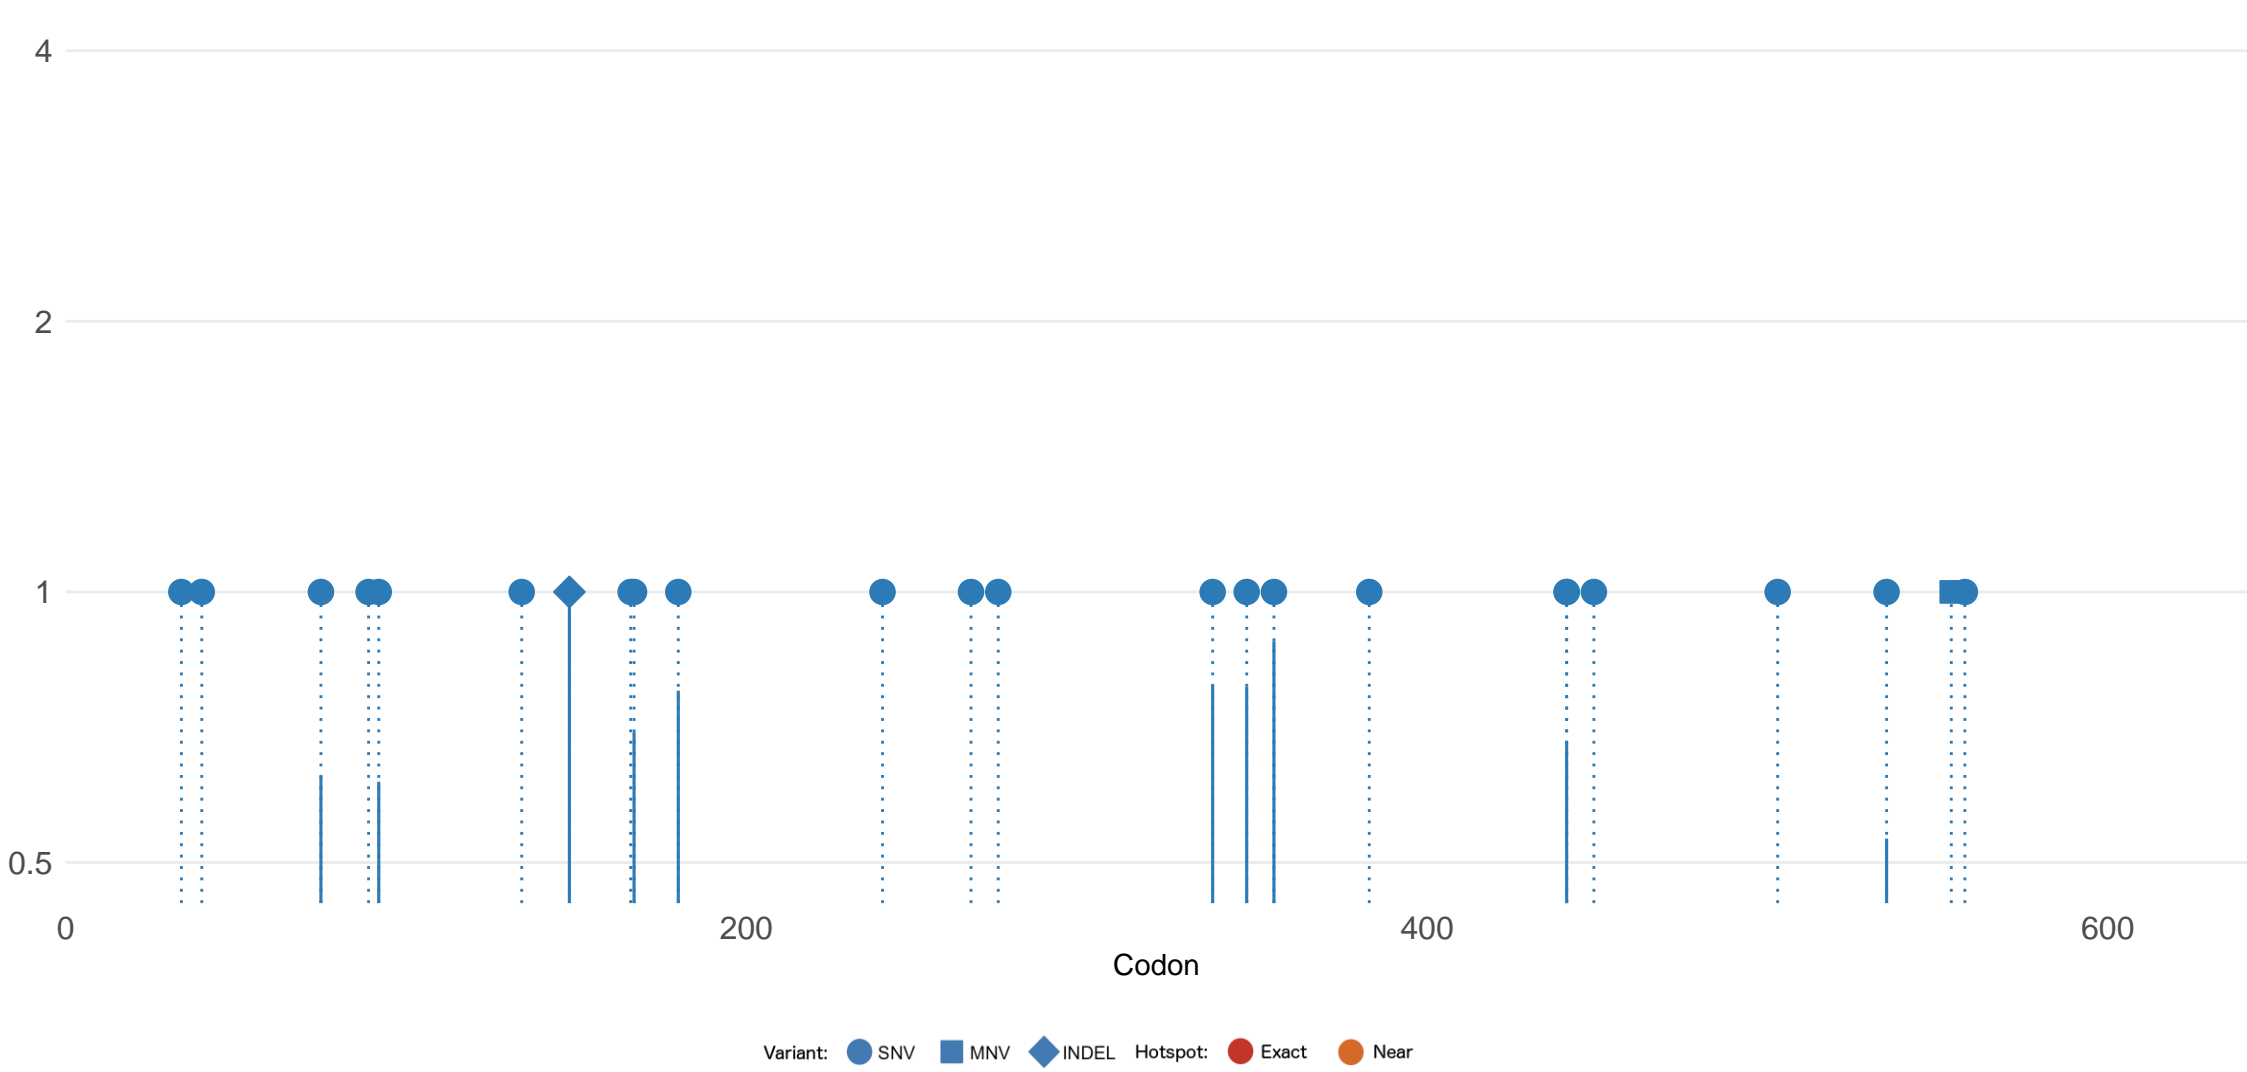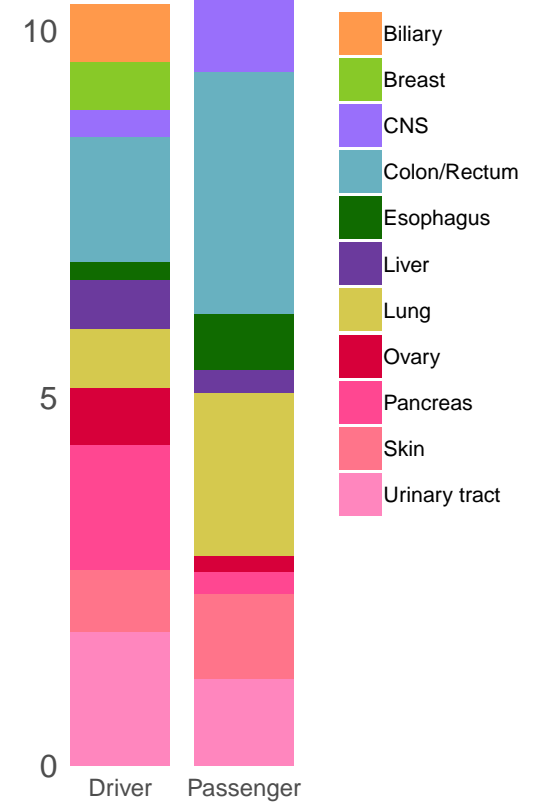



# RET Variants

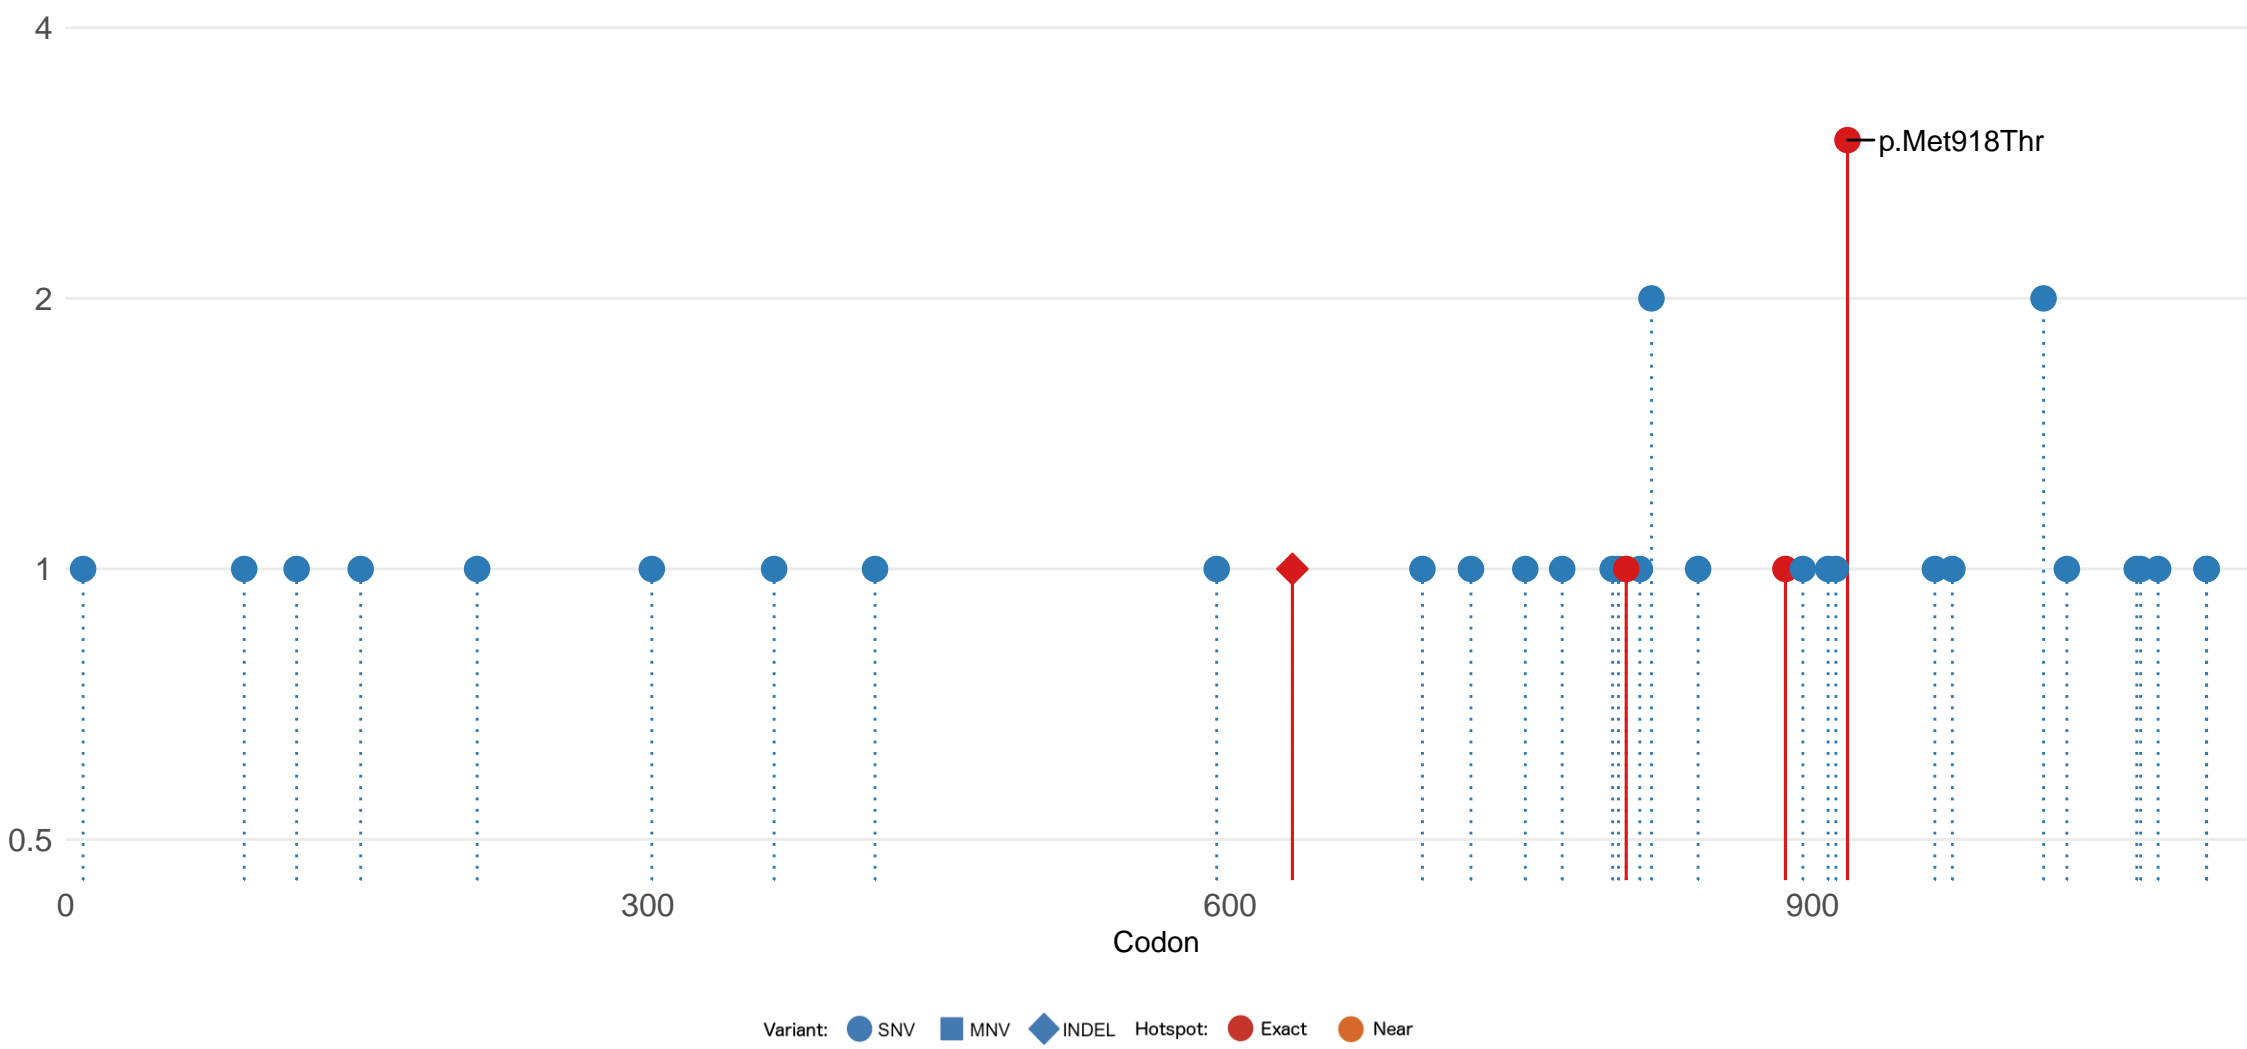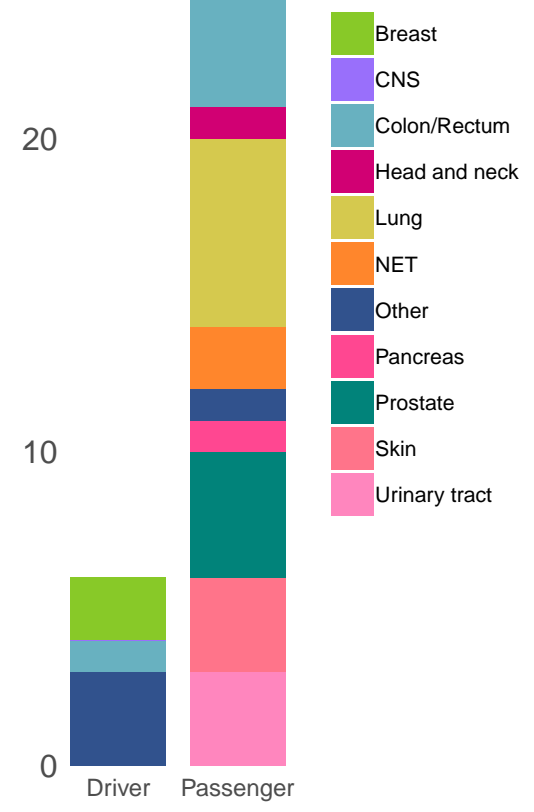

# RHOA Variants

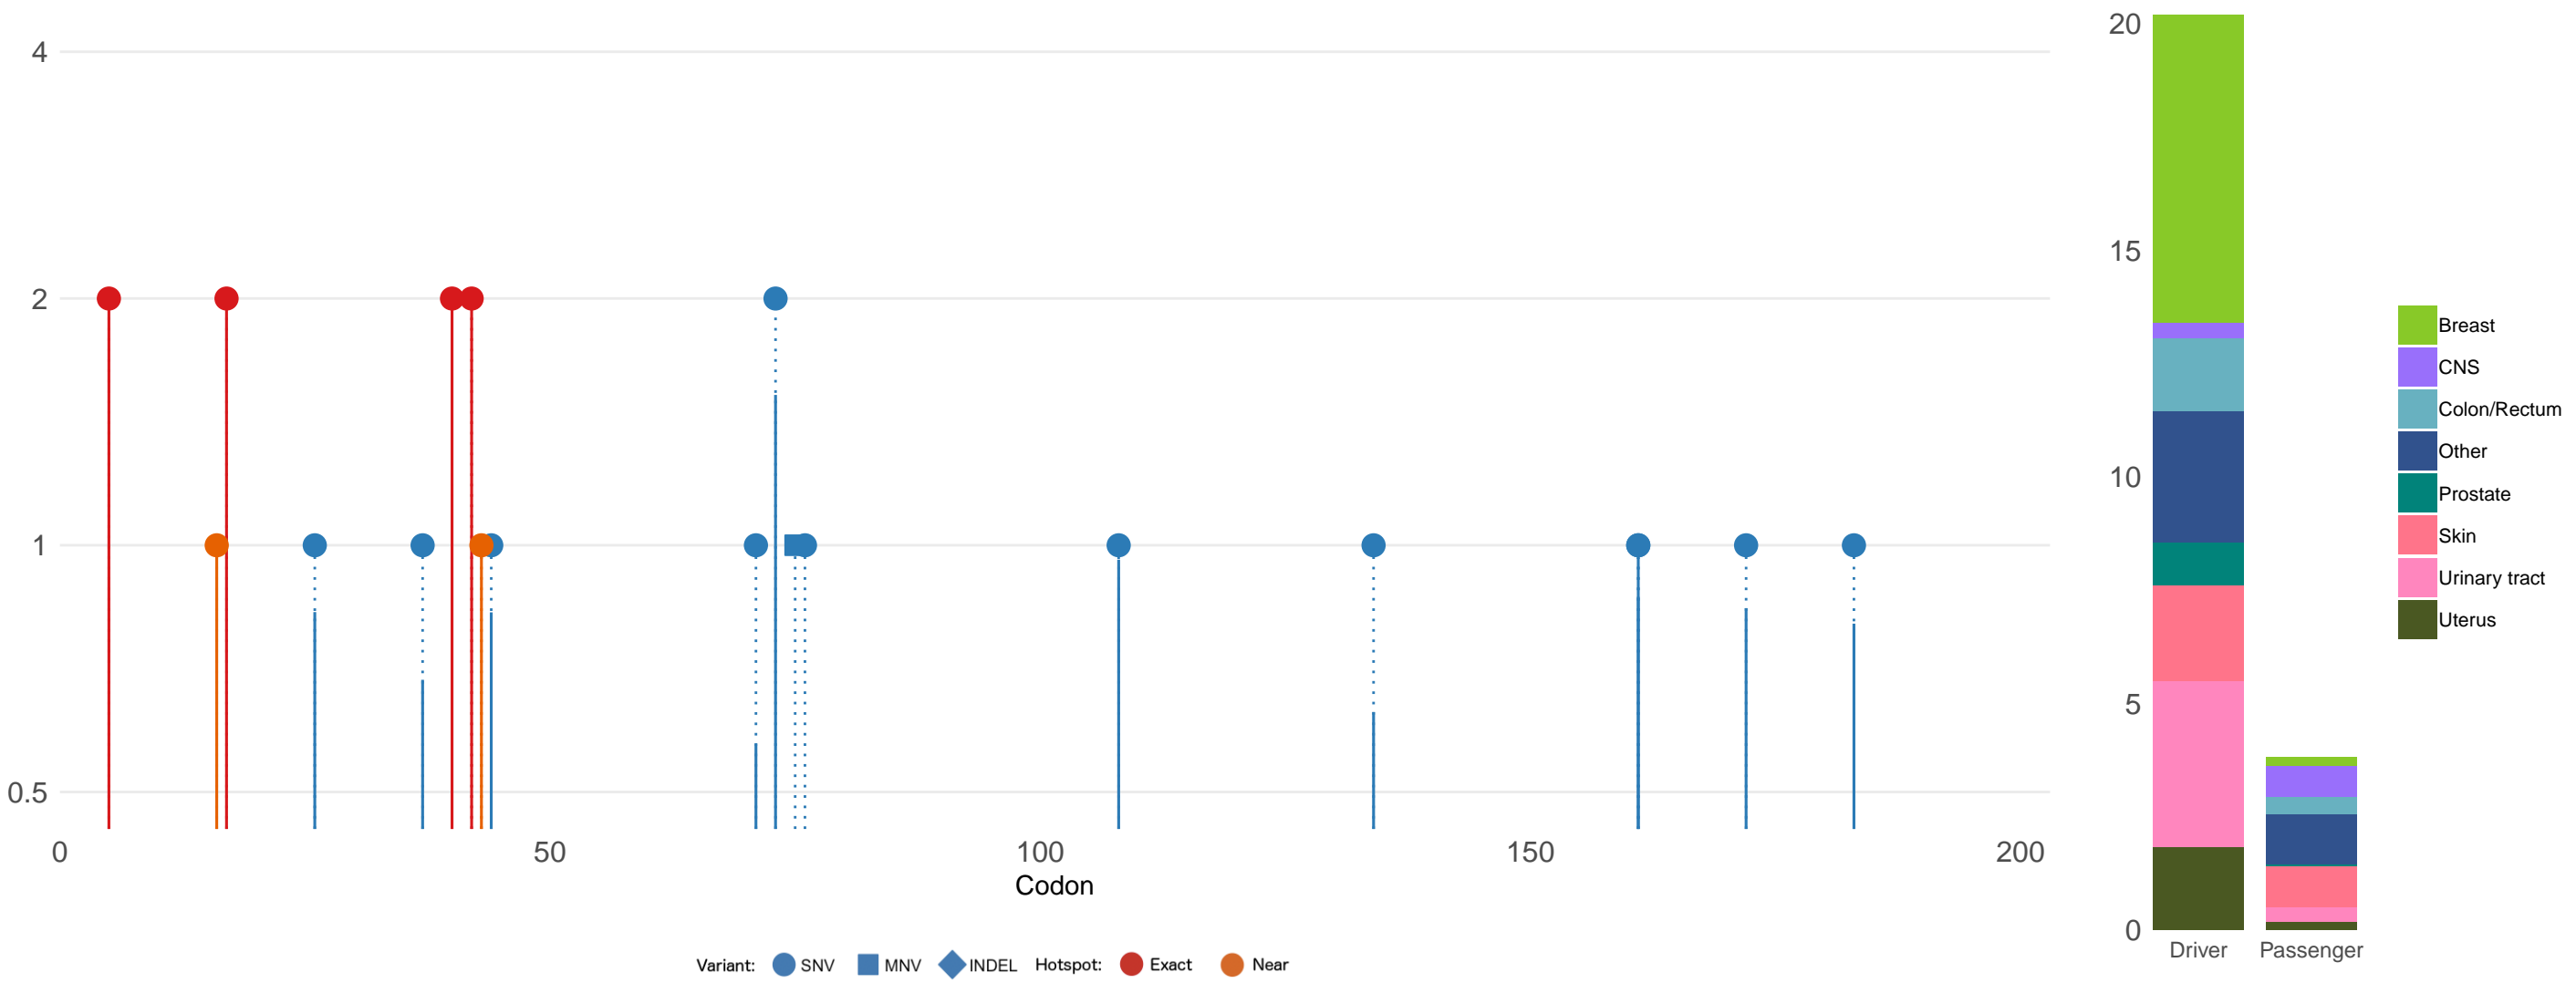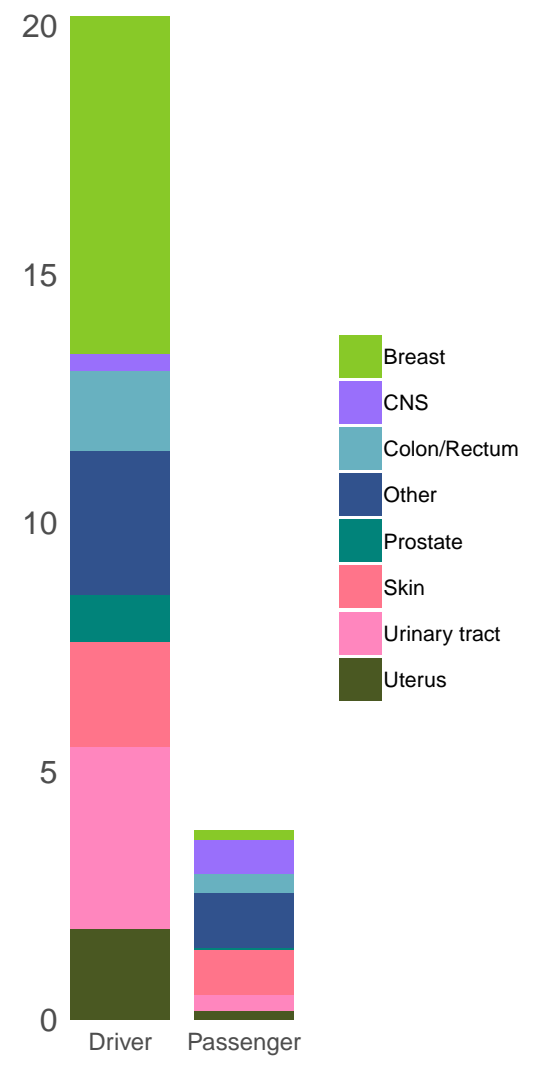

# RPL22 Variants

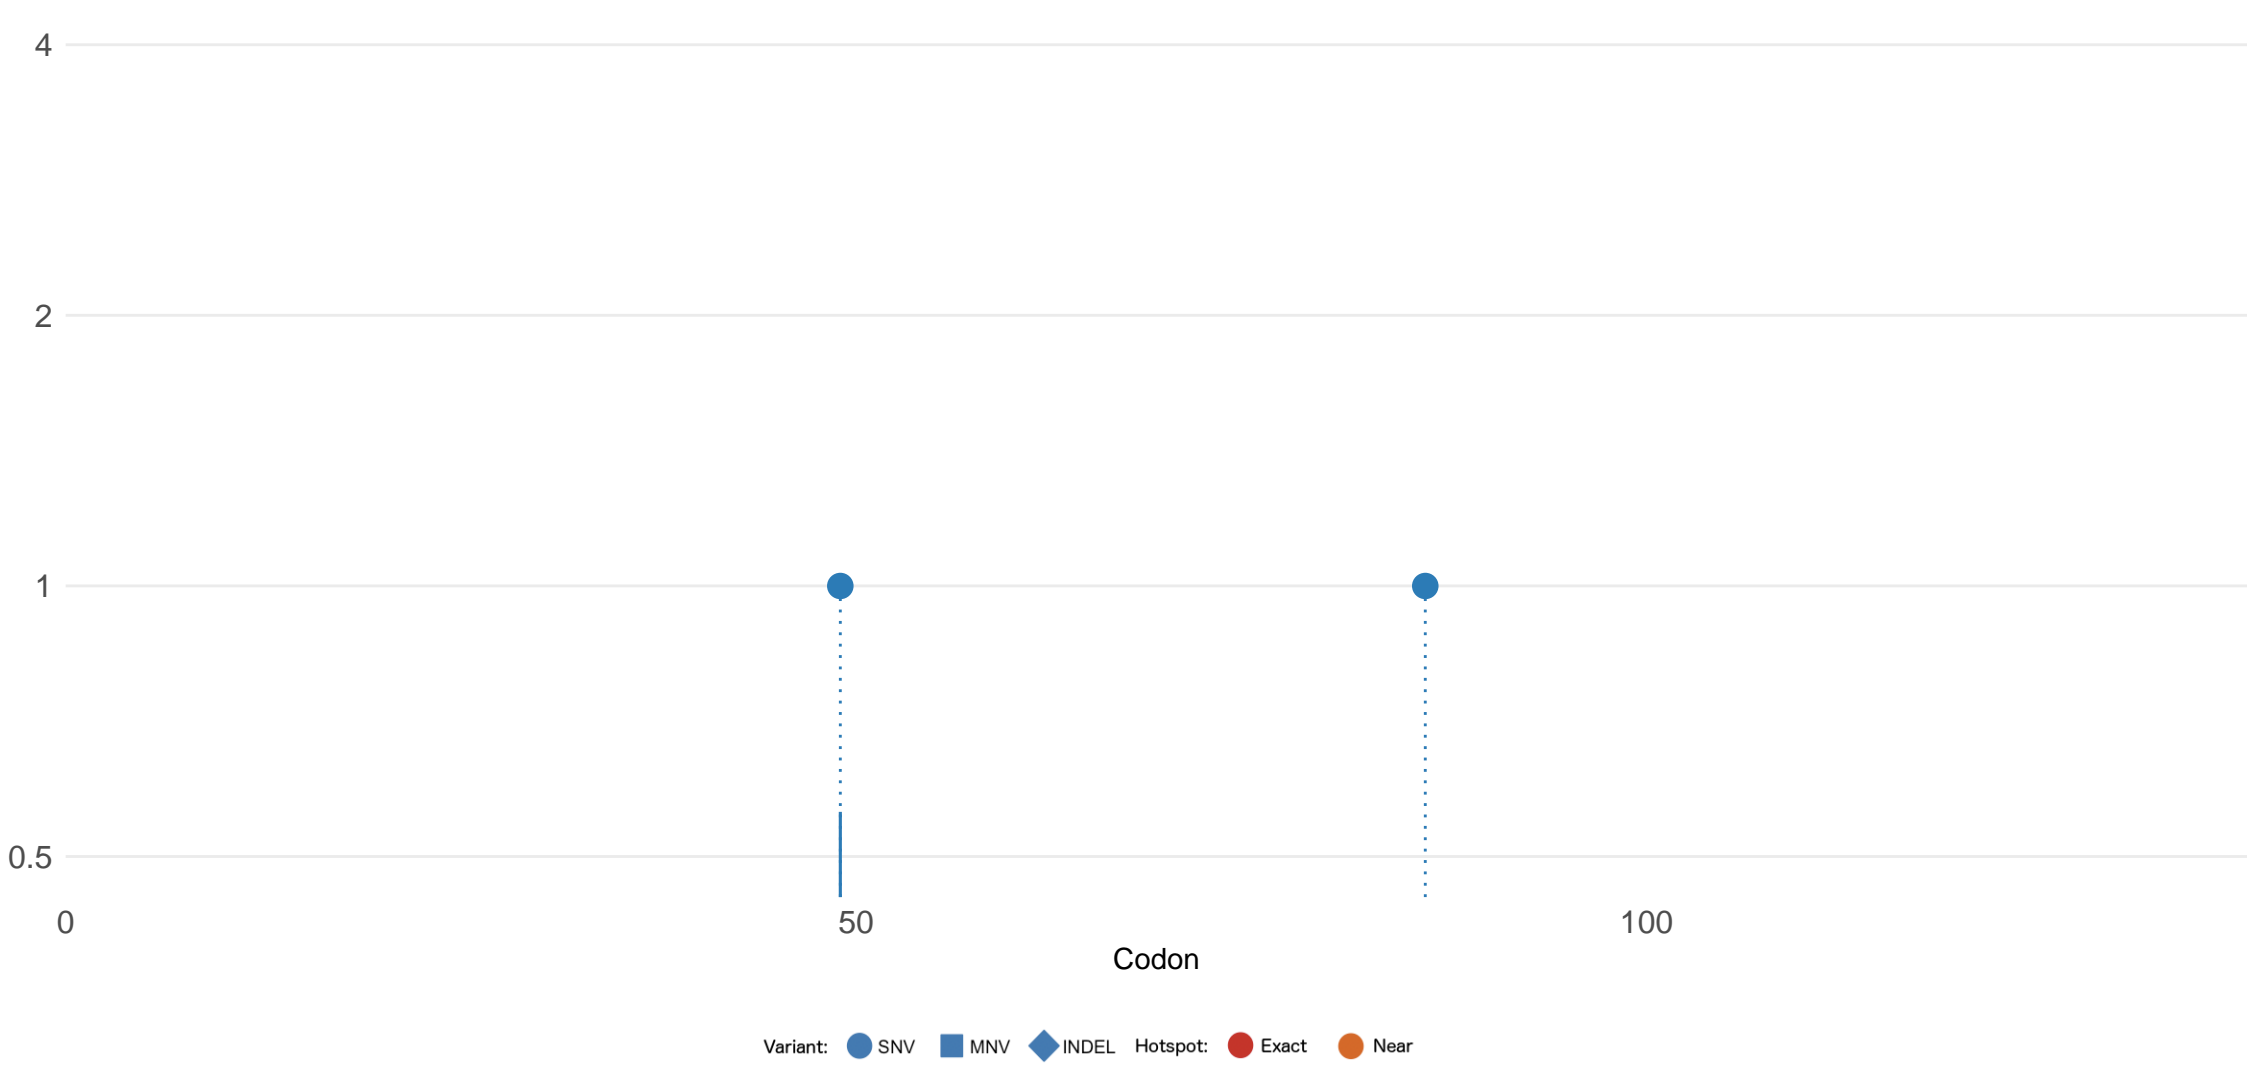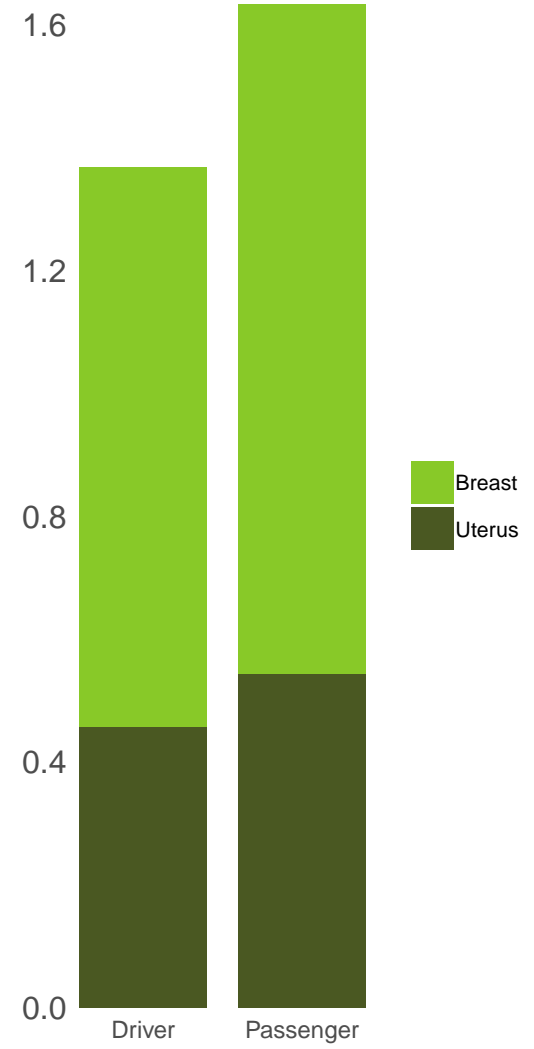

# SETBP1 Variants

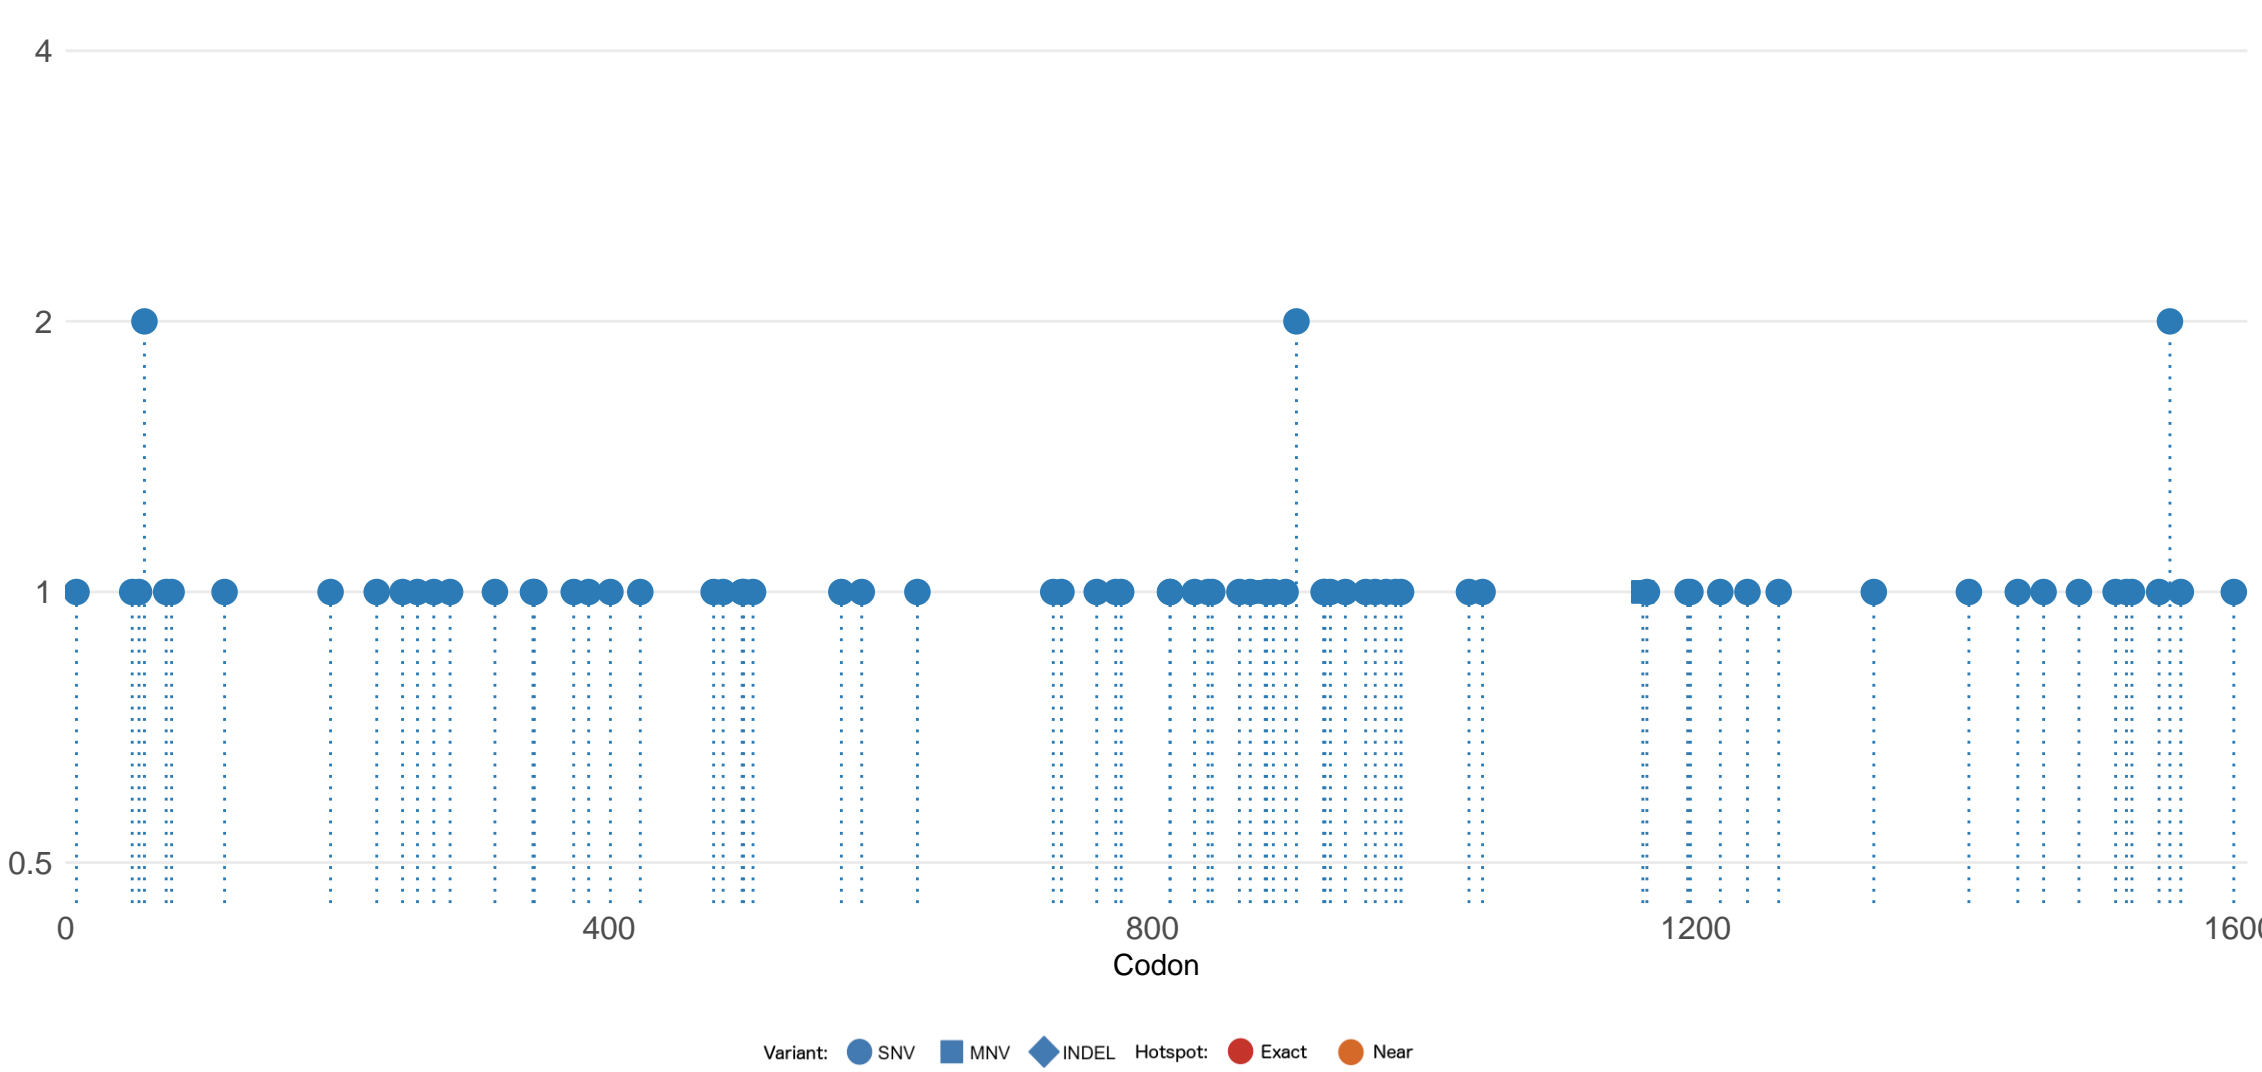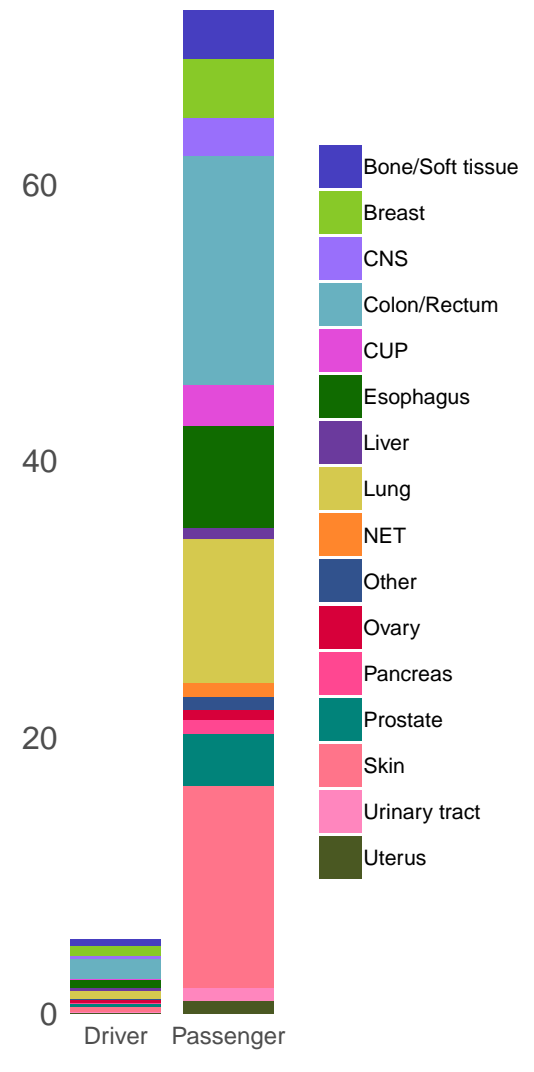

# SF3B1 Variants

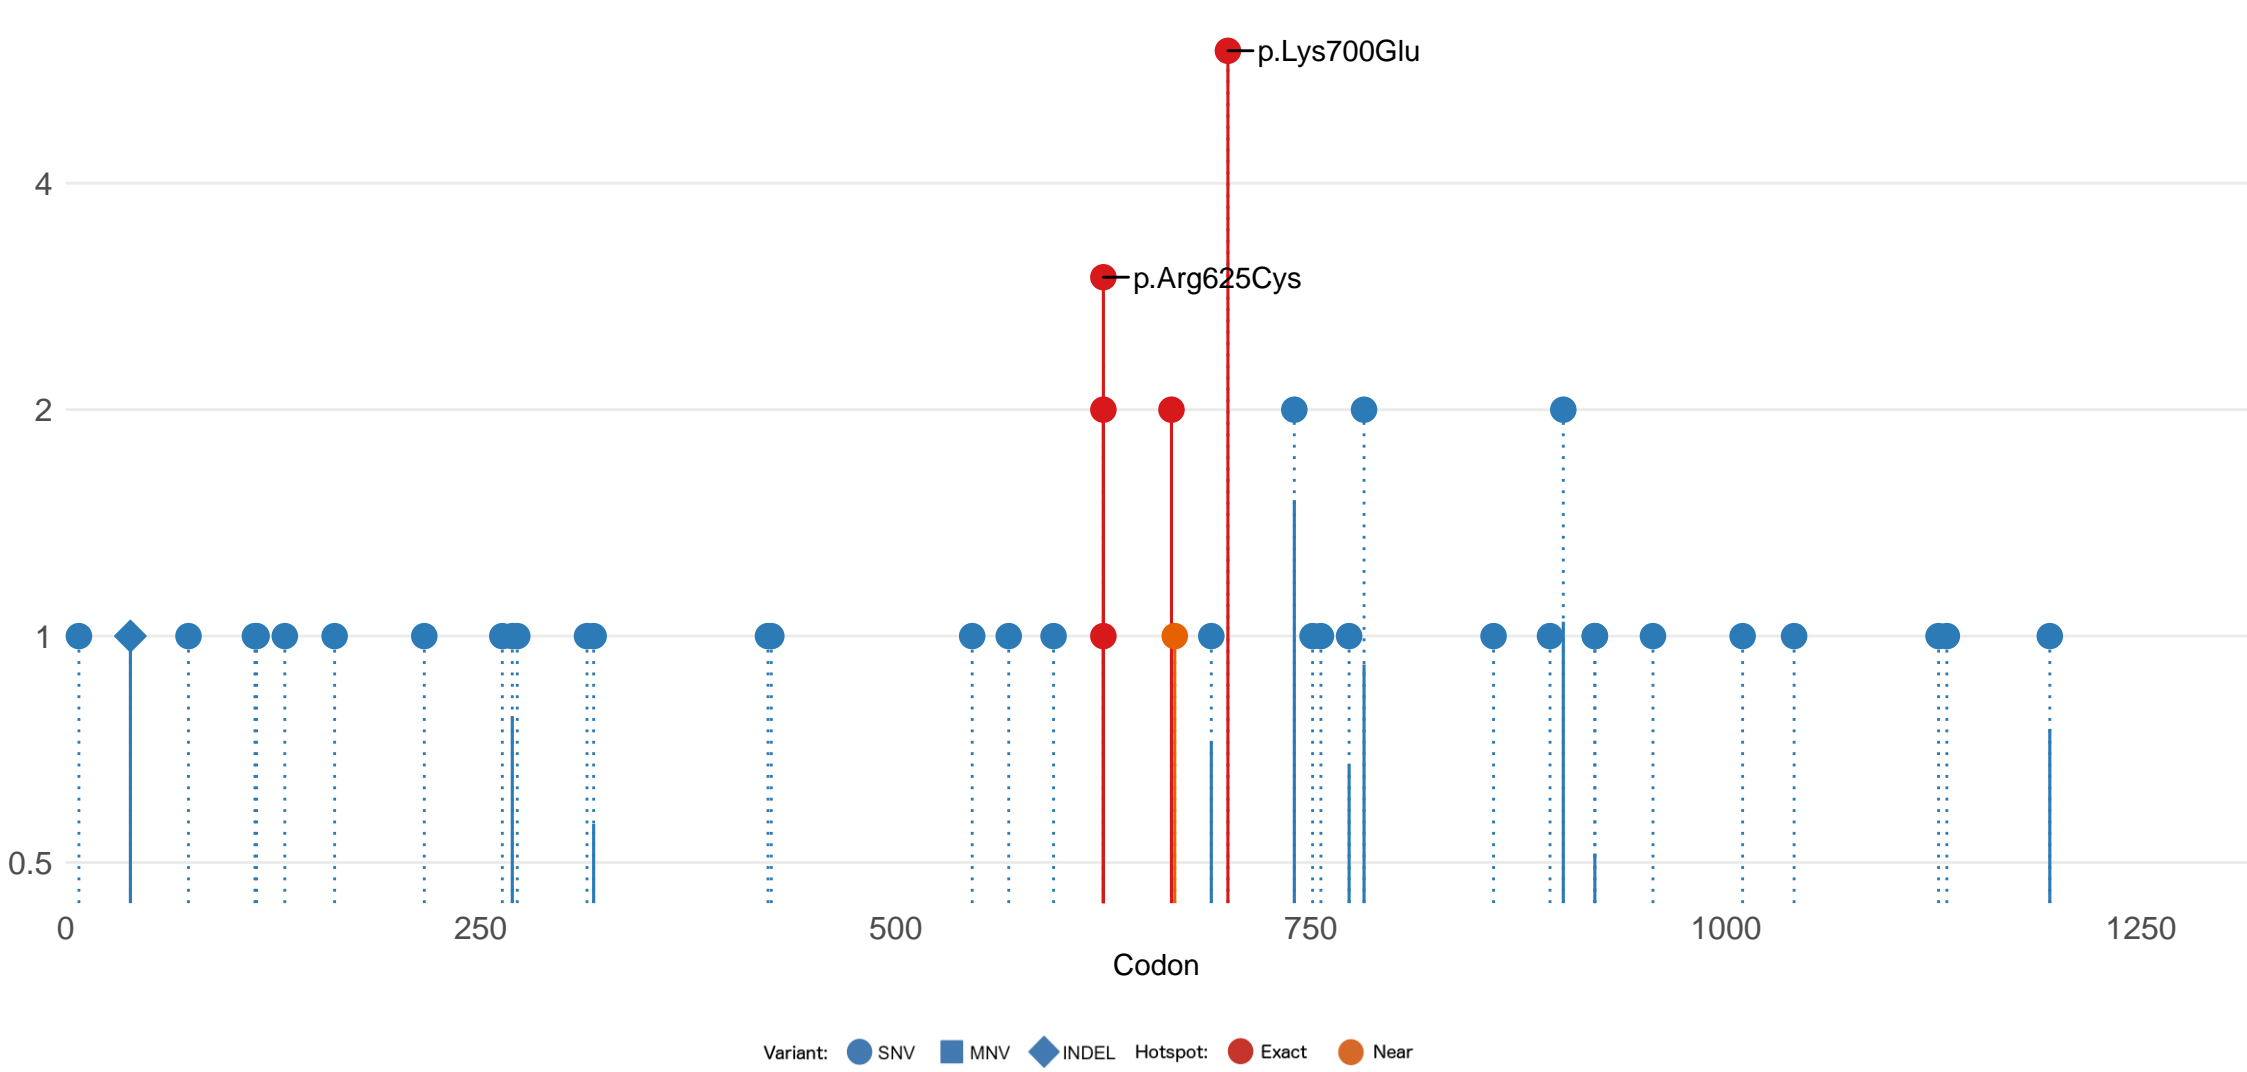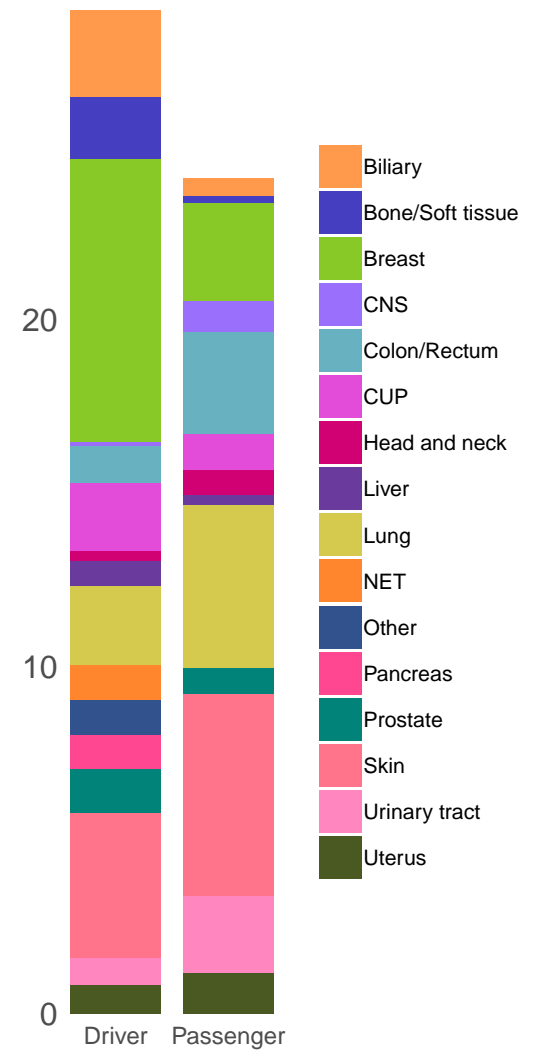

# SIX1 Variants

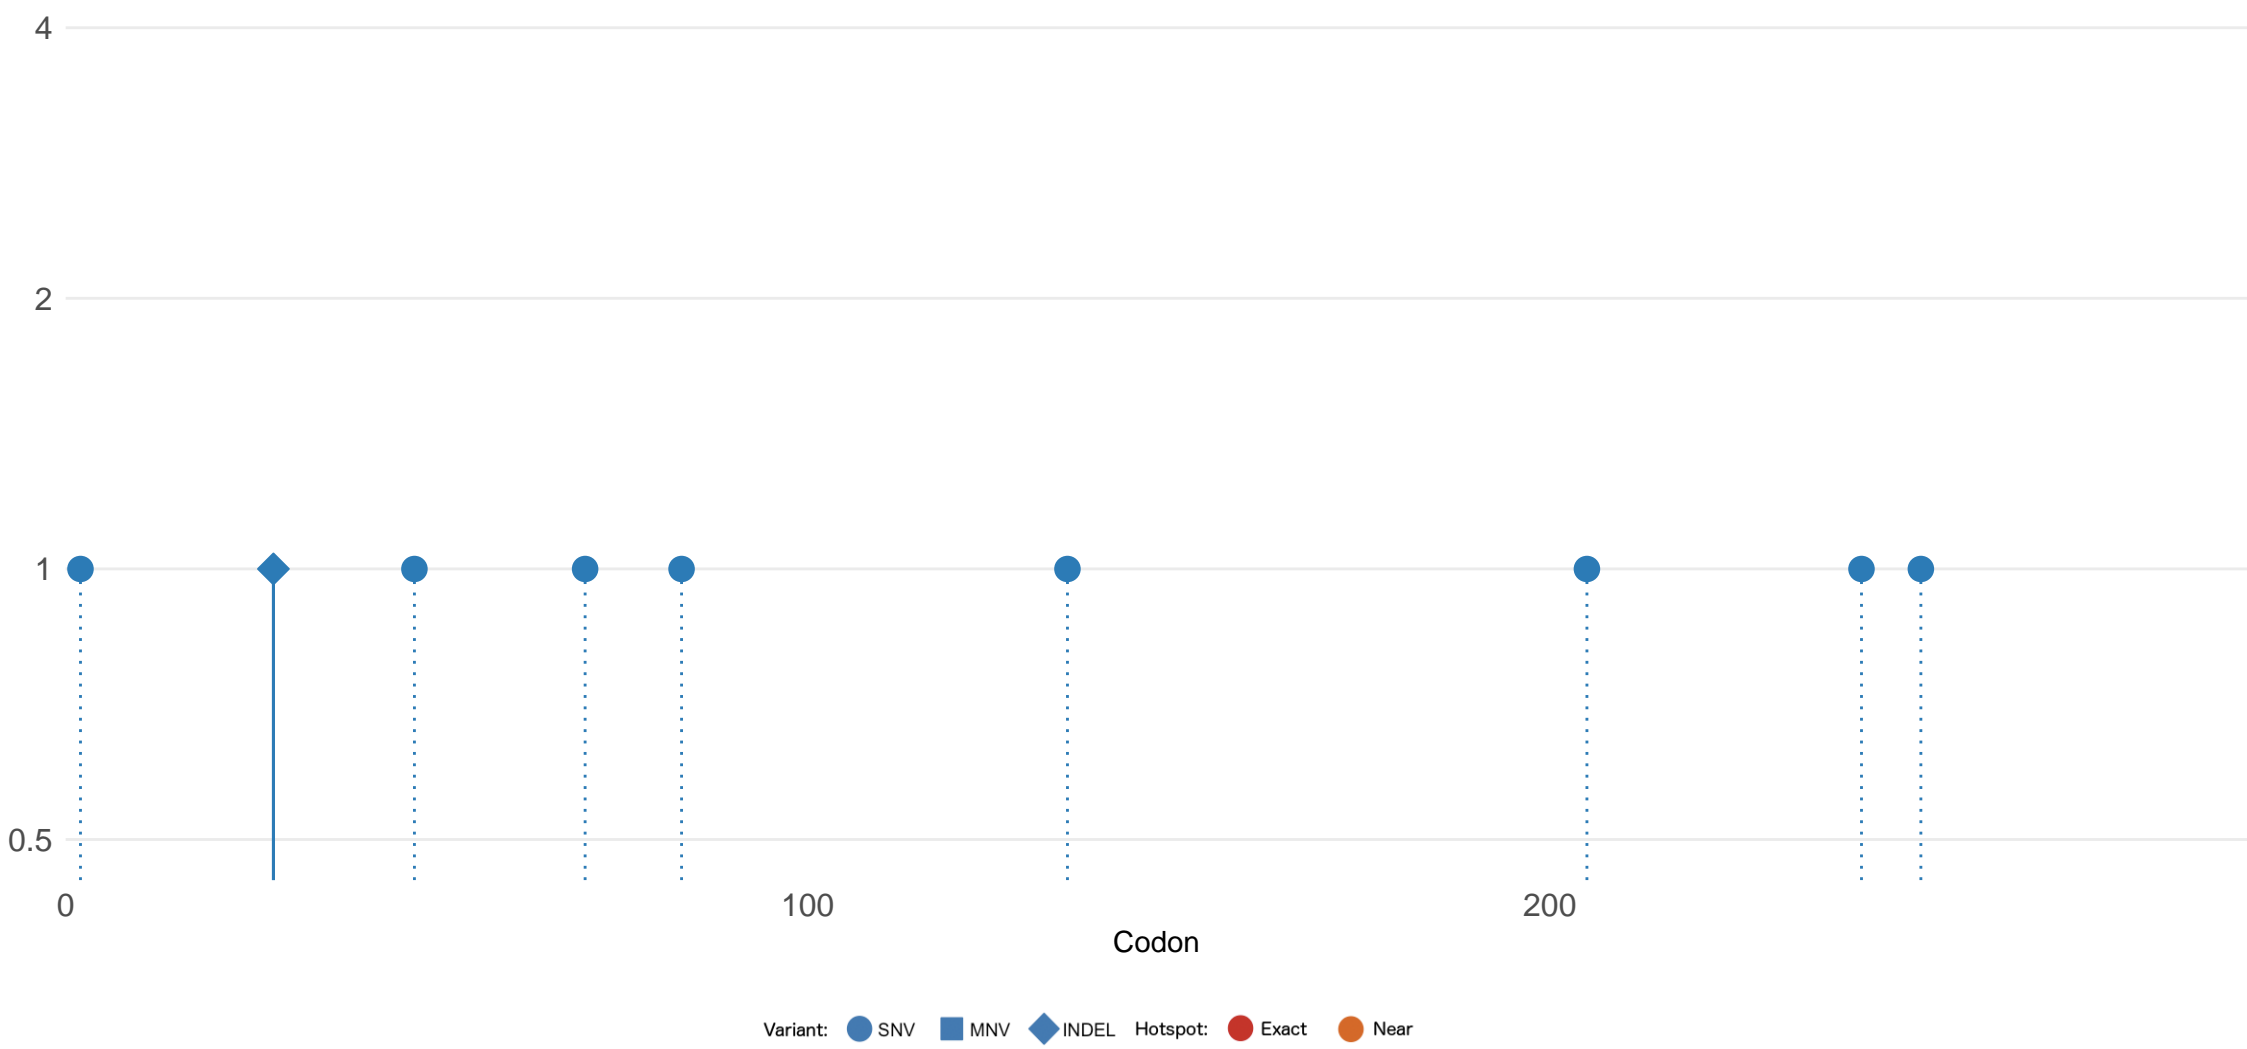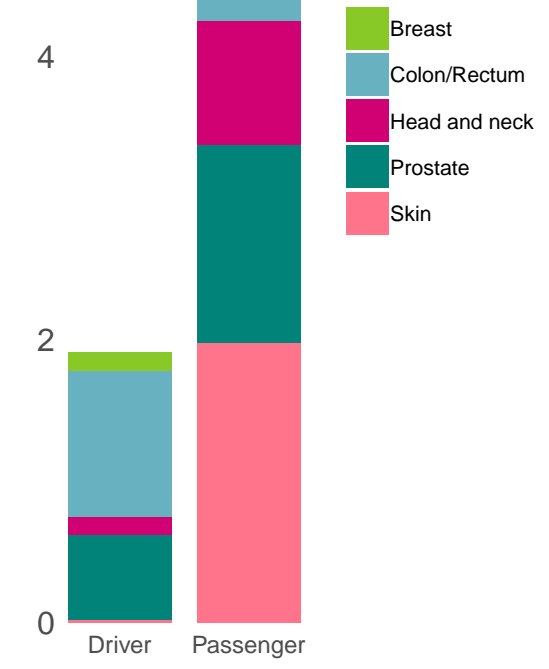

# SMO Variants

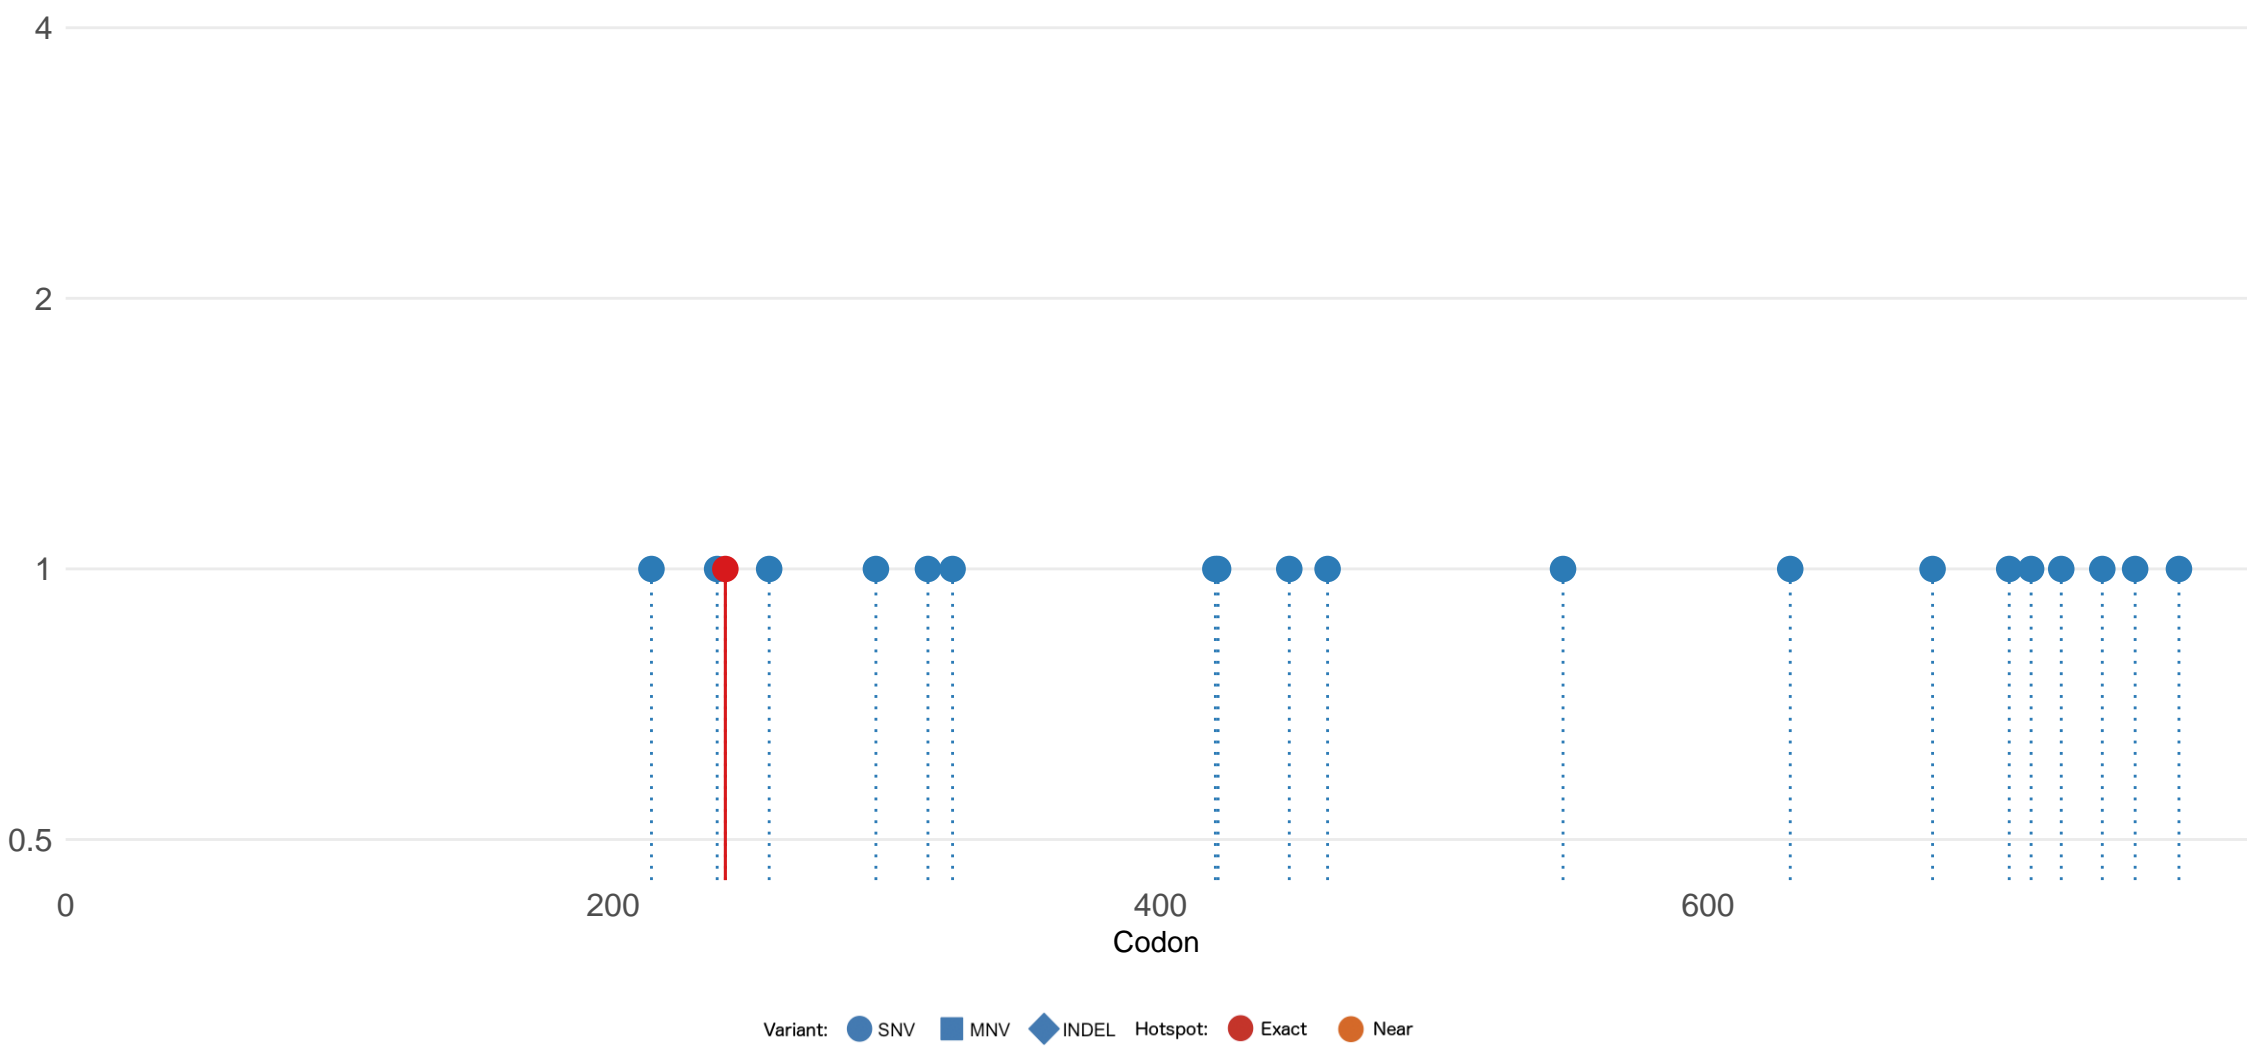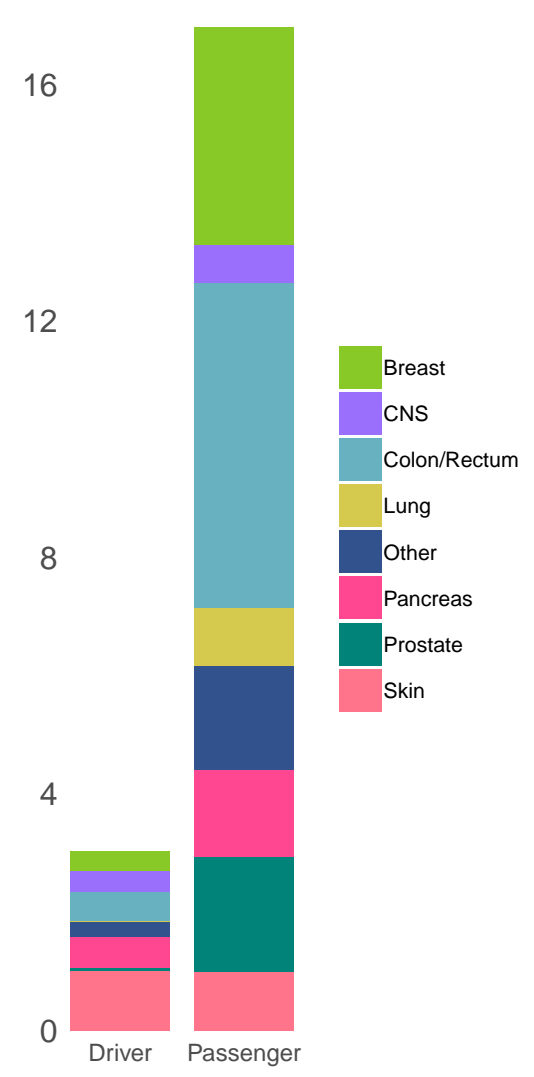

# SMTNL2 Variants

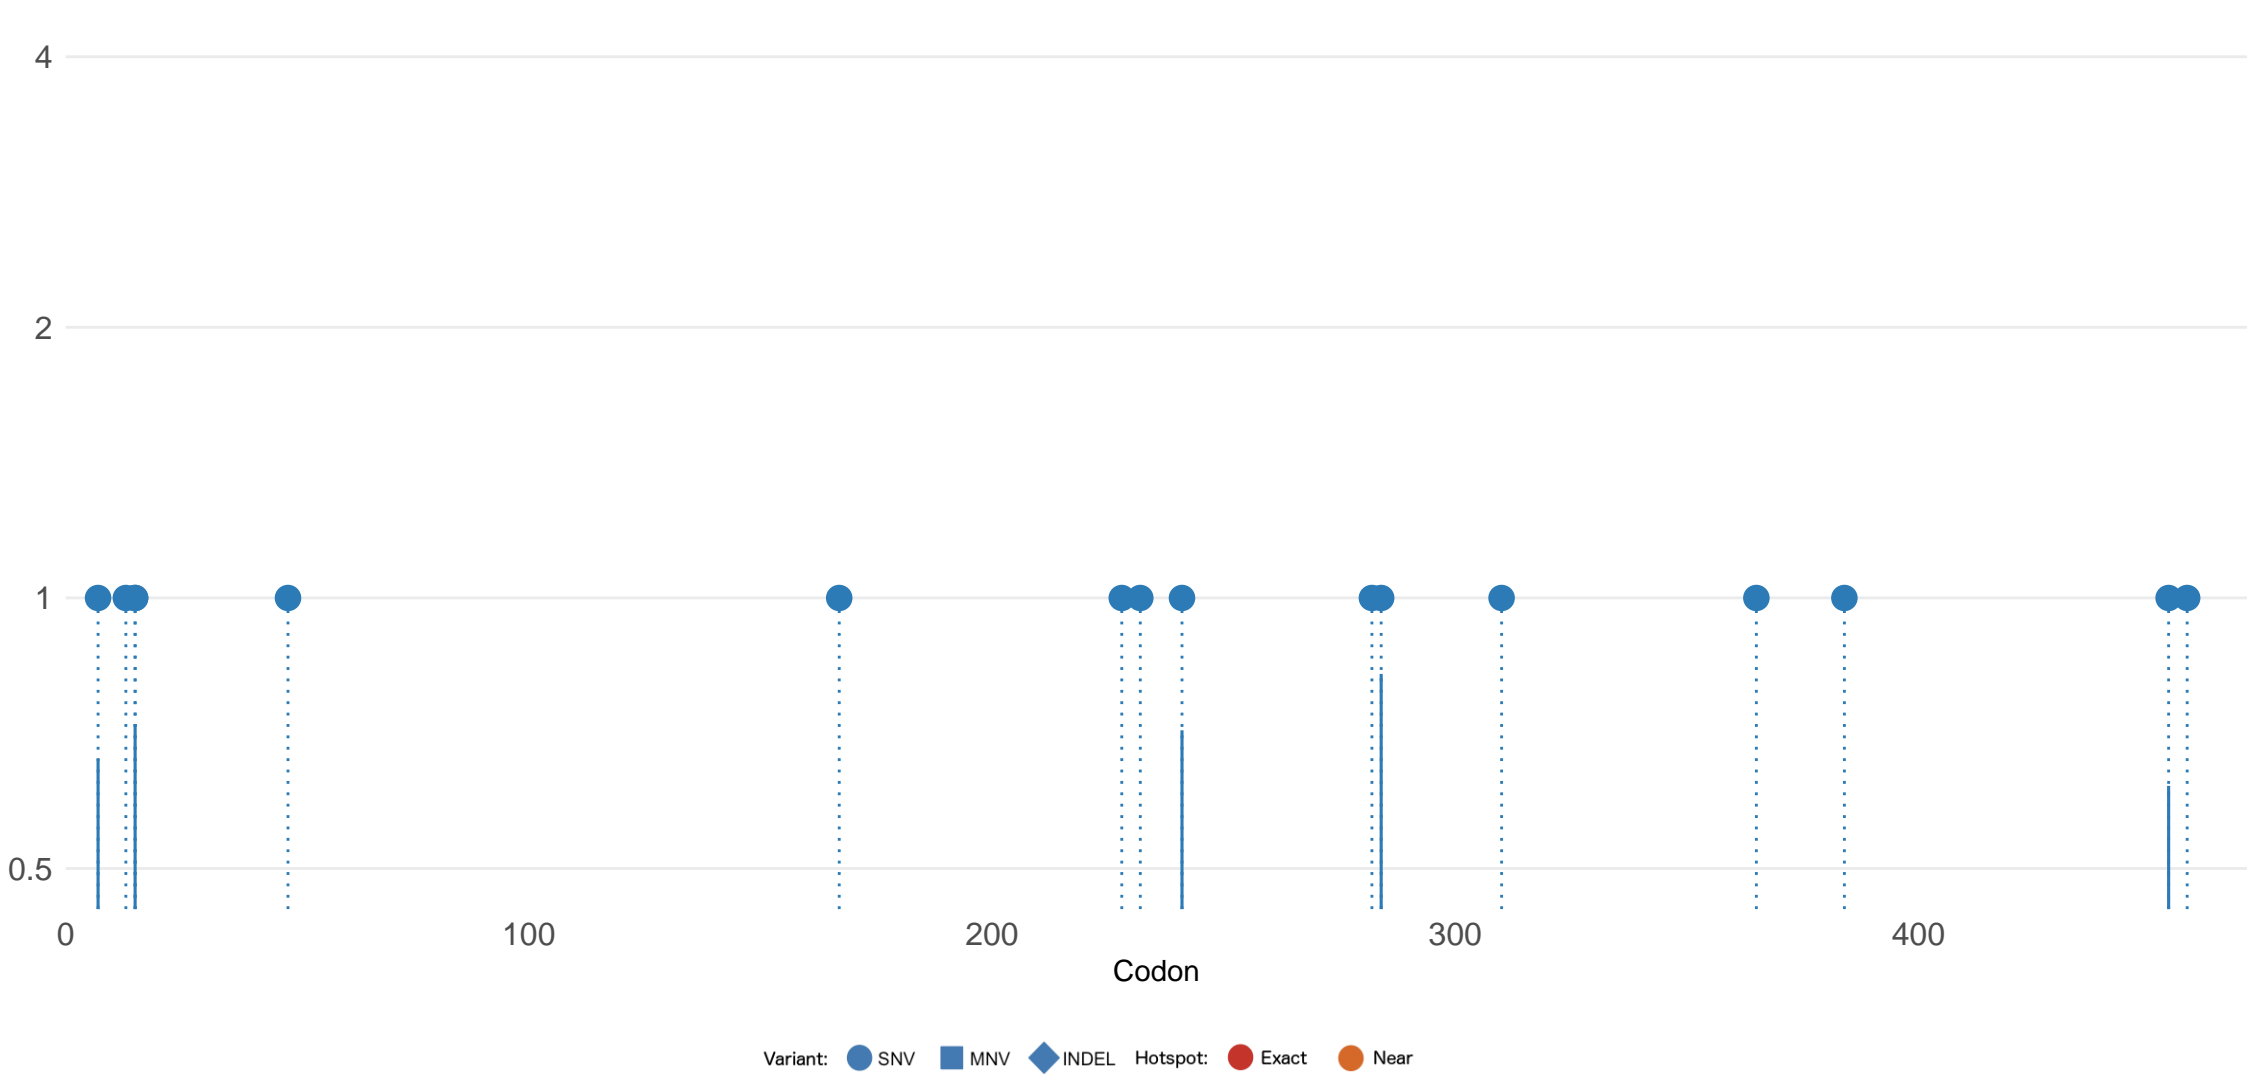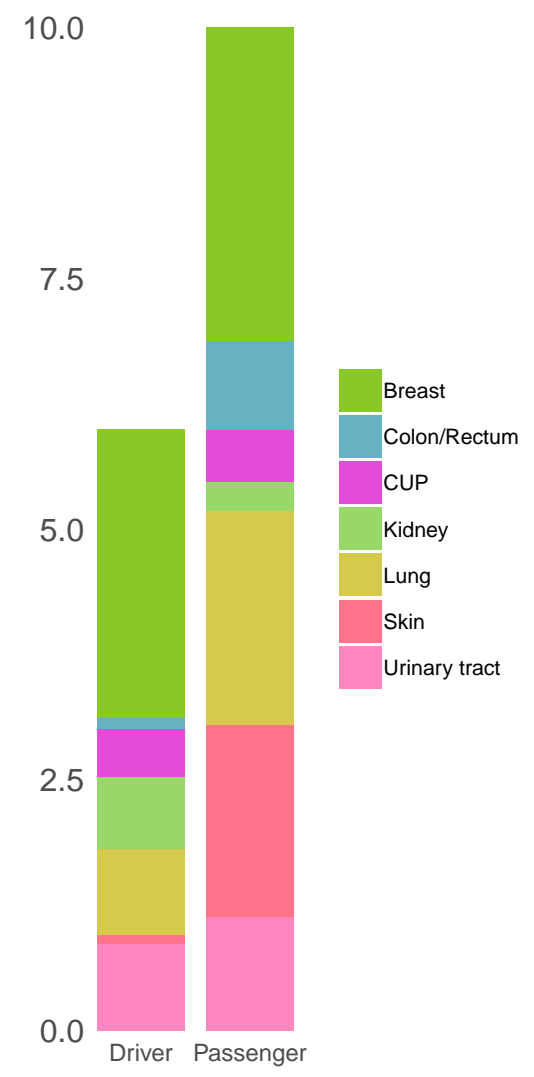



# SPOP Variants

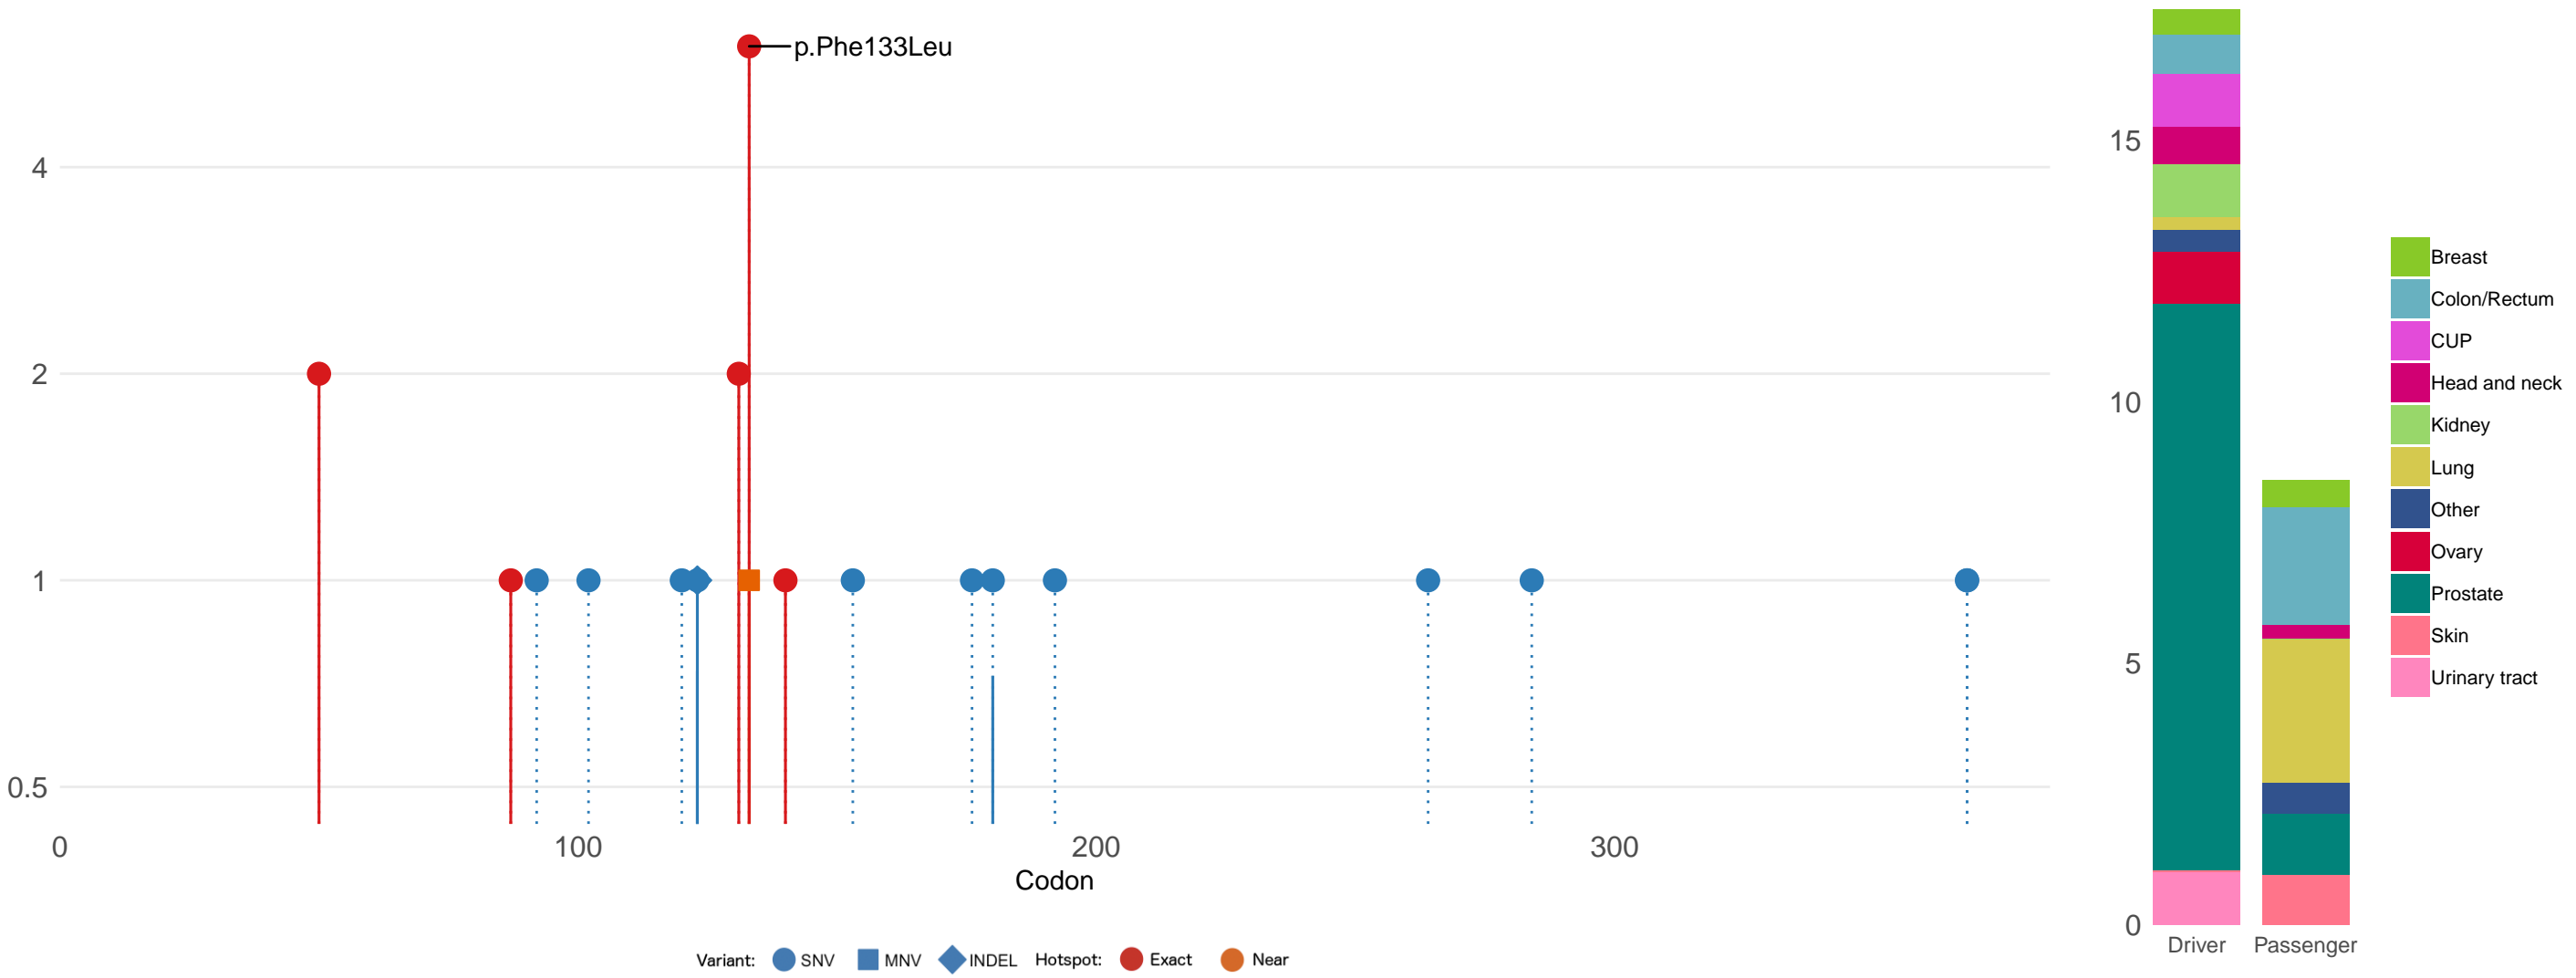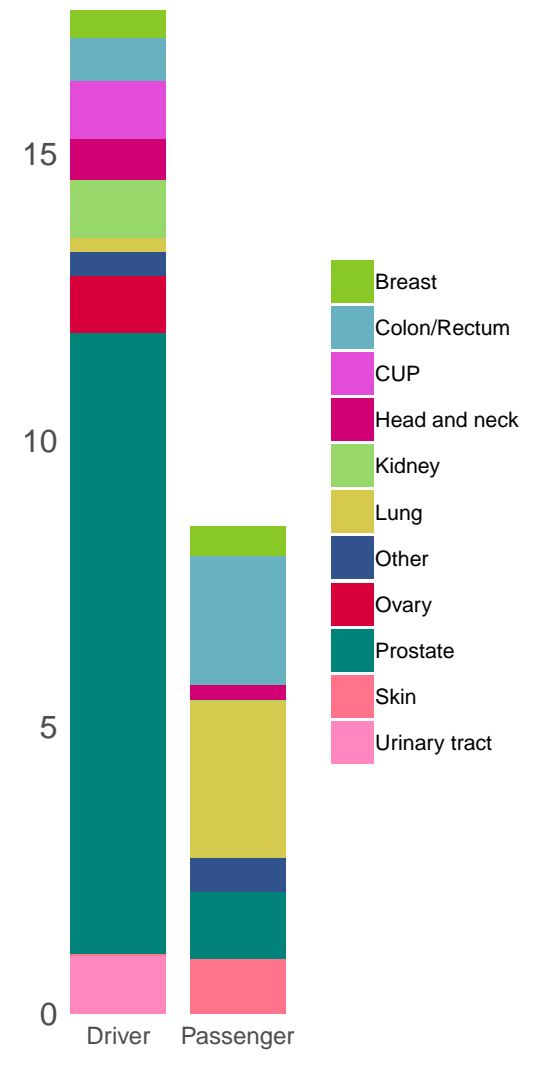

# SPTAN1 Variants

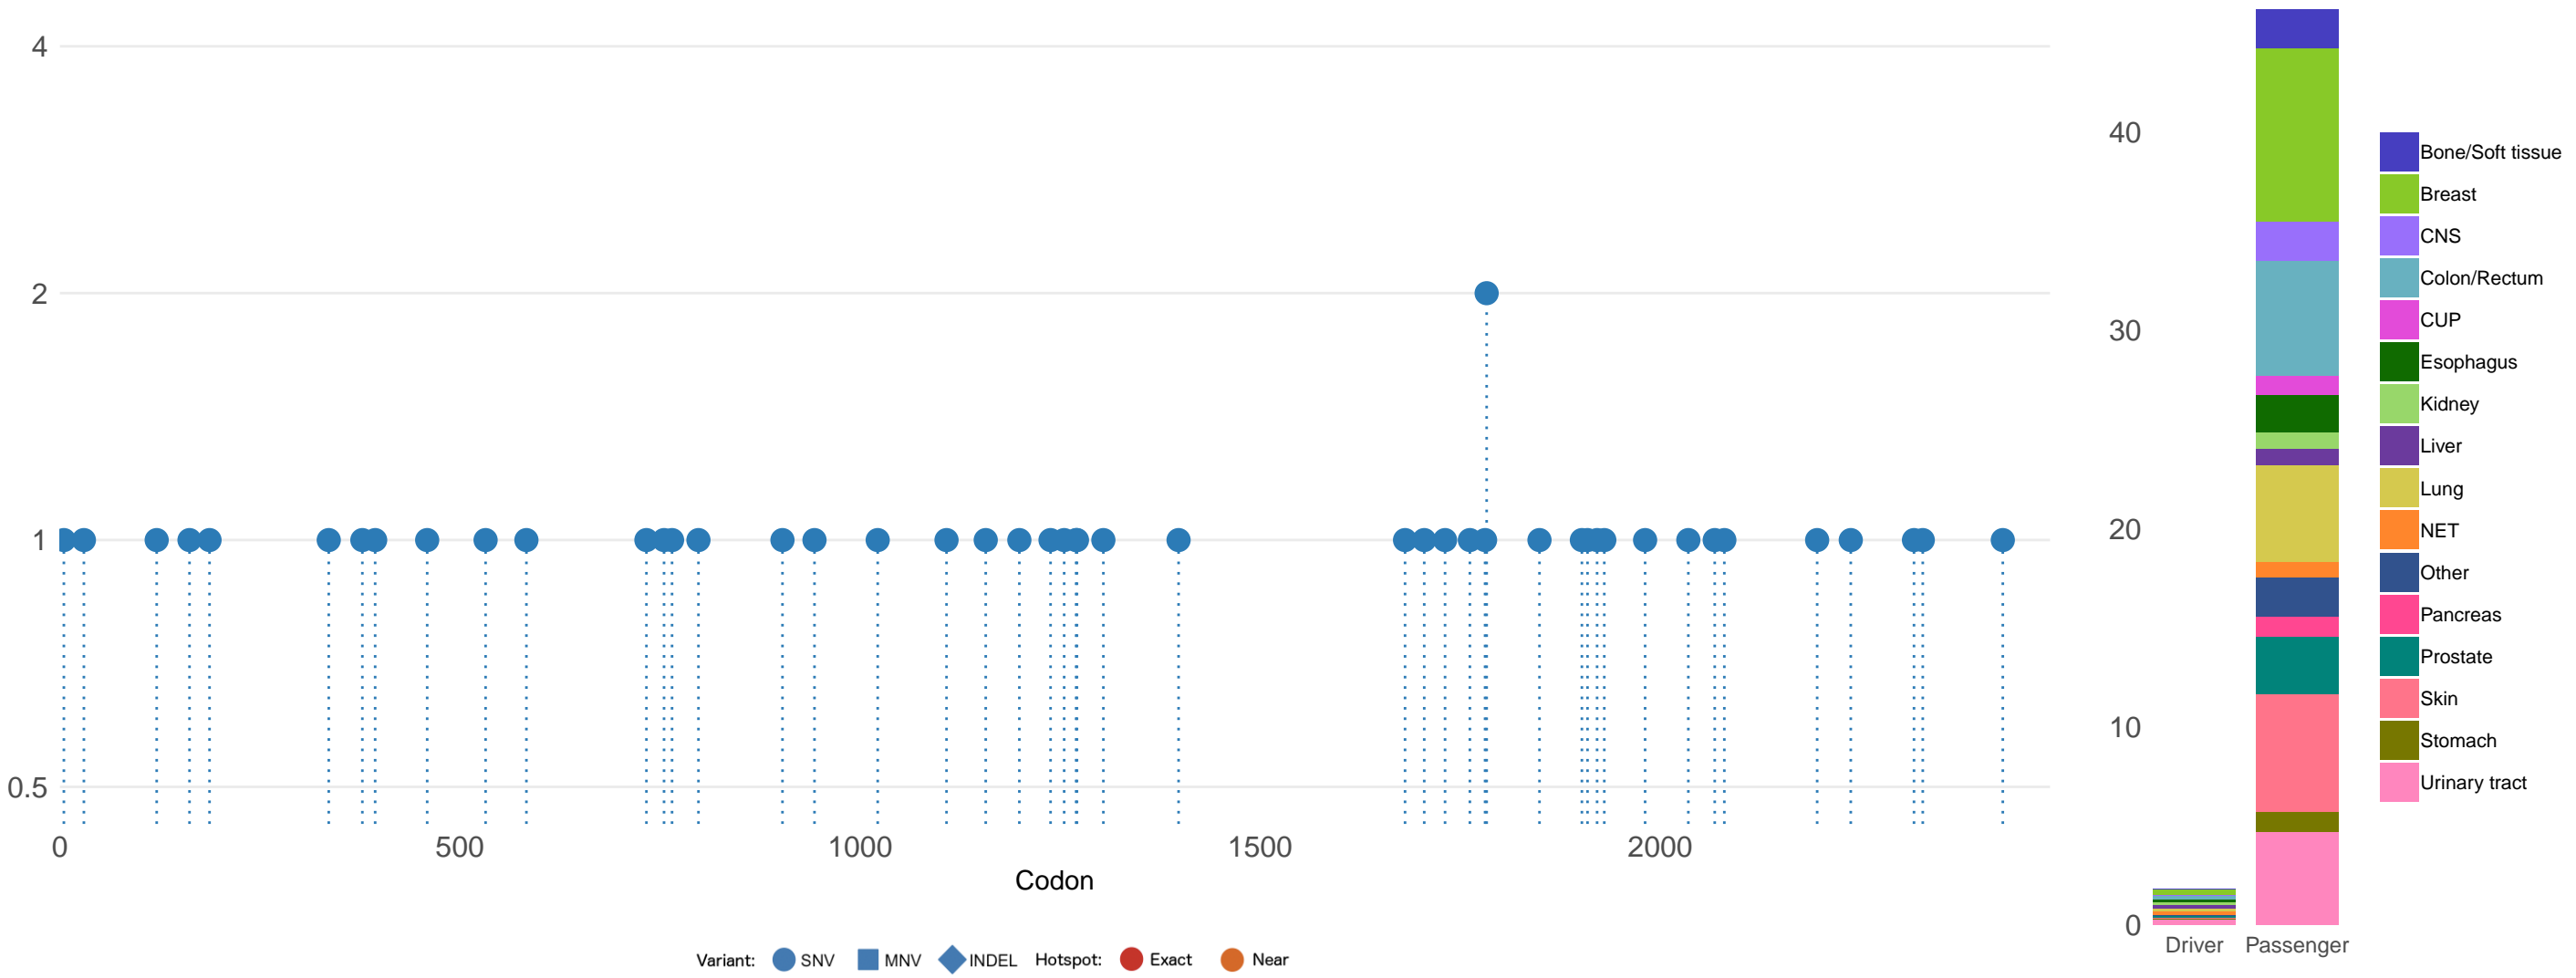

# SRC Variants

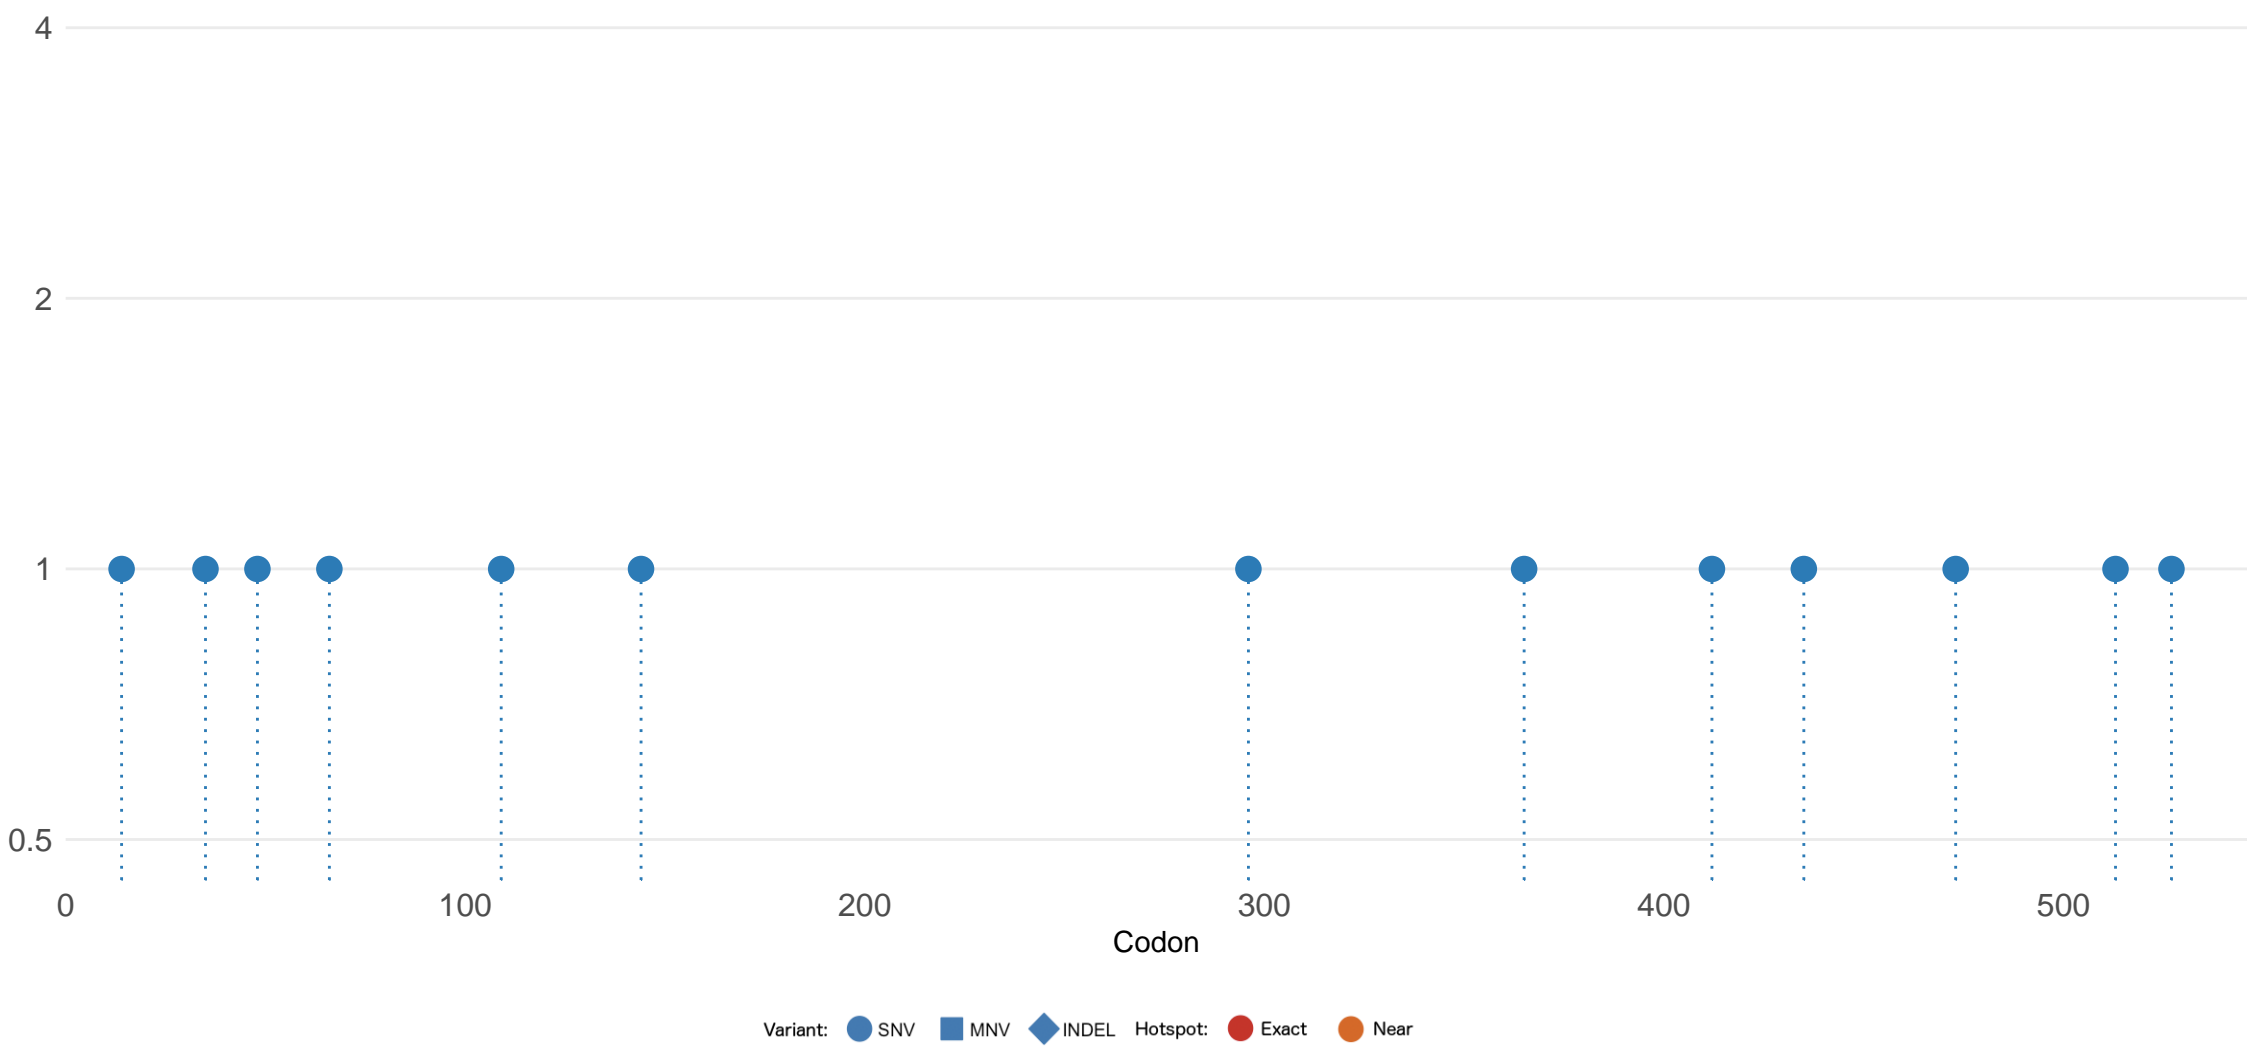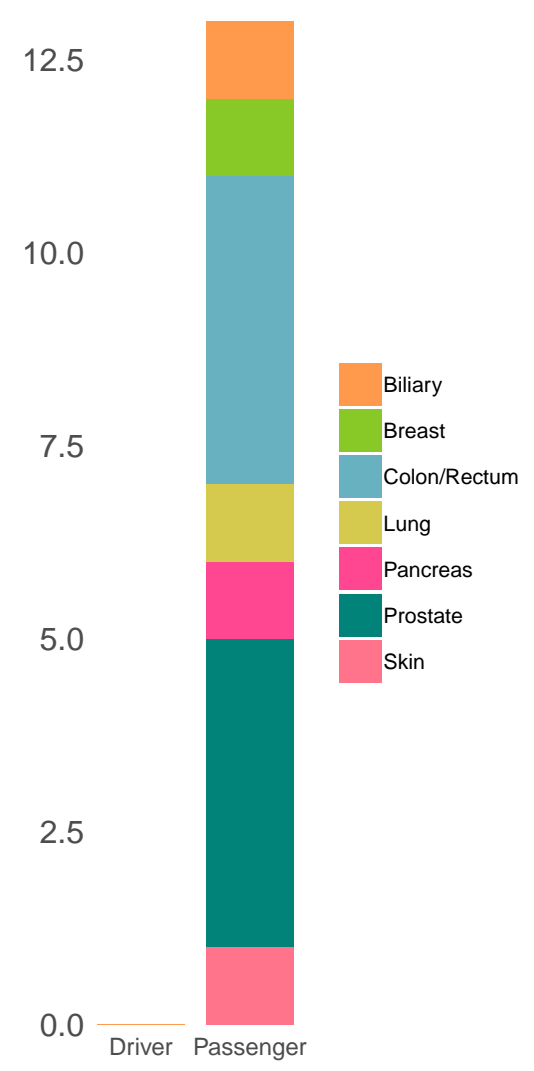

# SRSF2 Variants

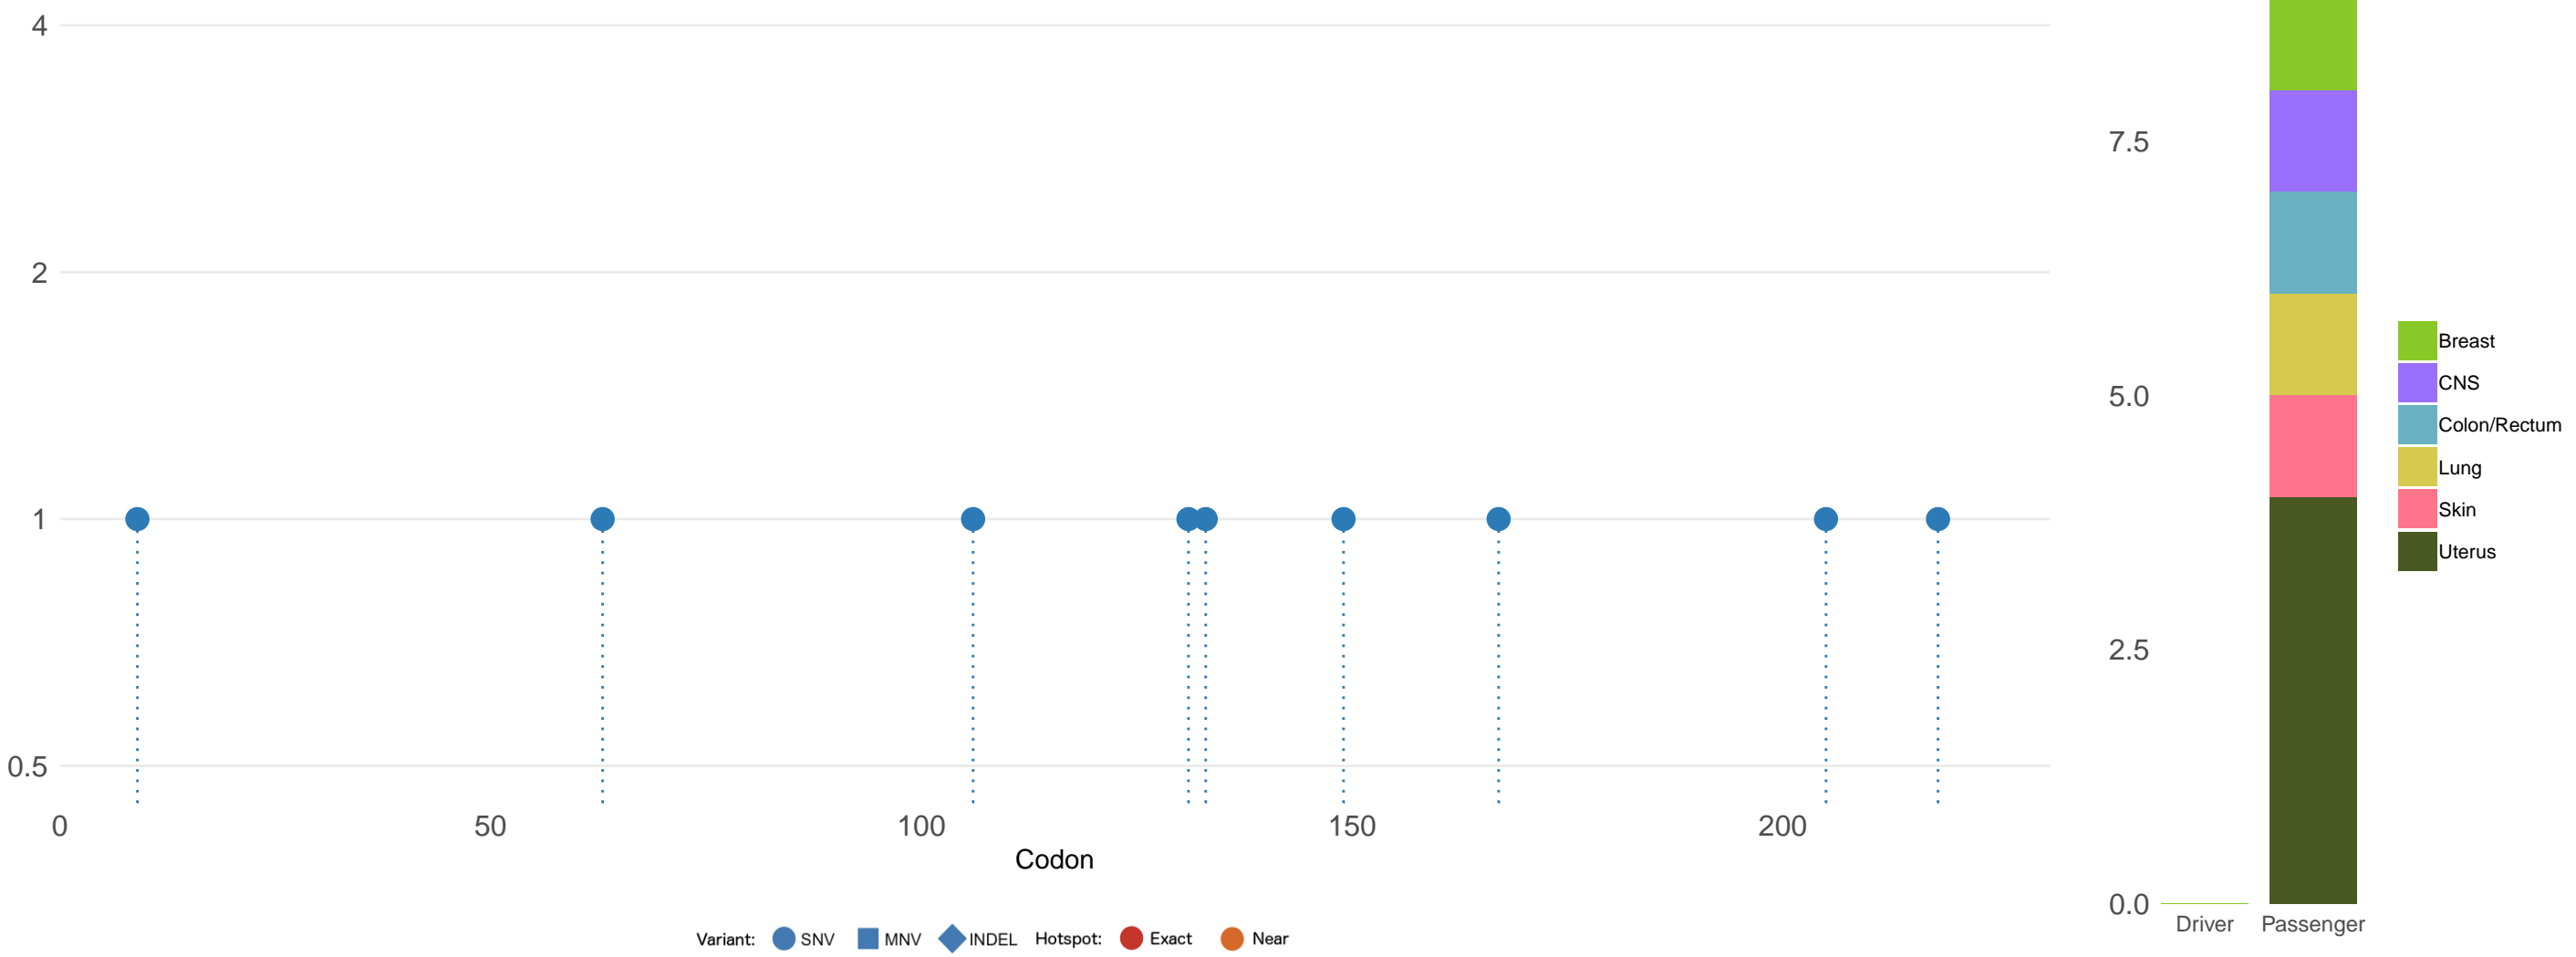

# STAT3 Variants

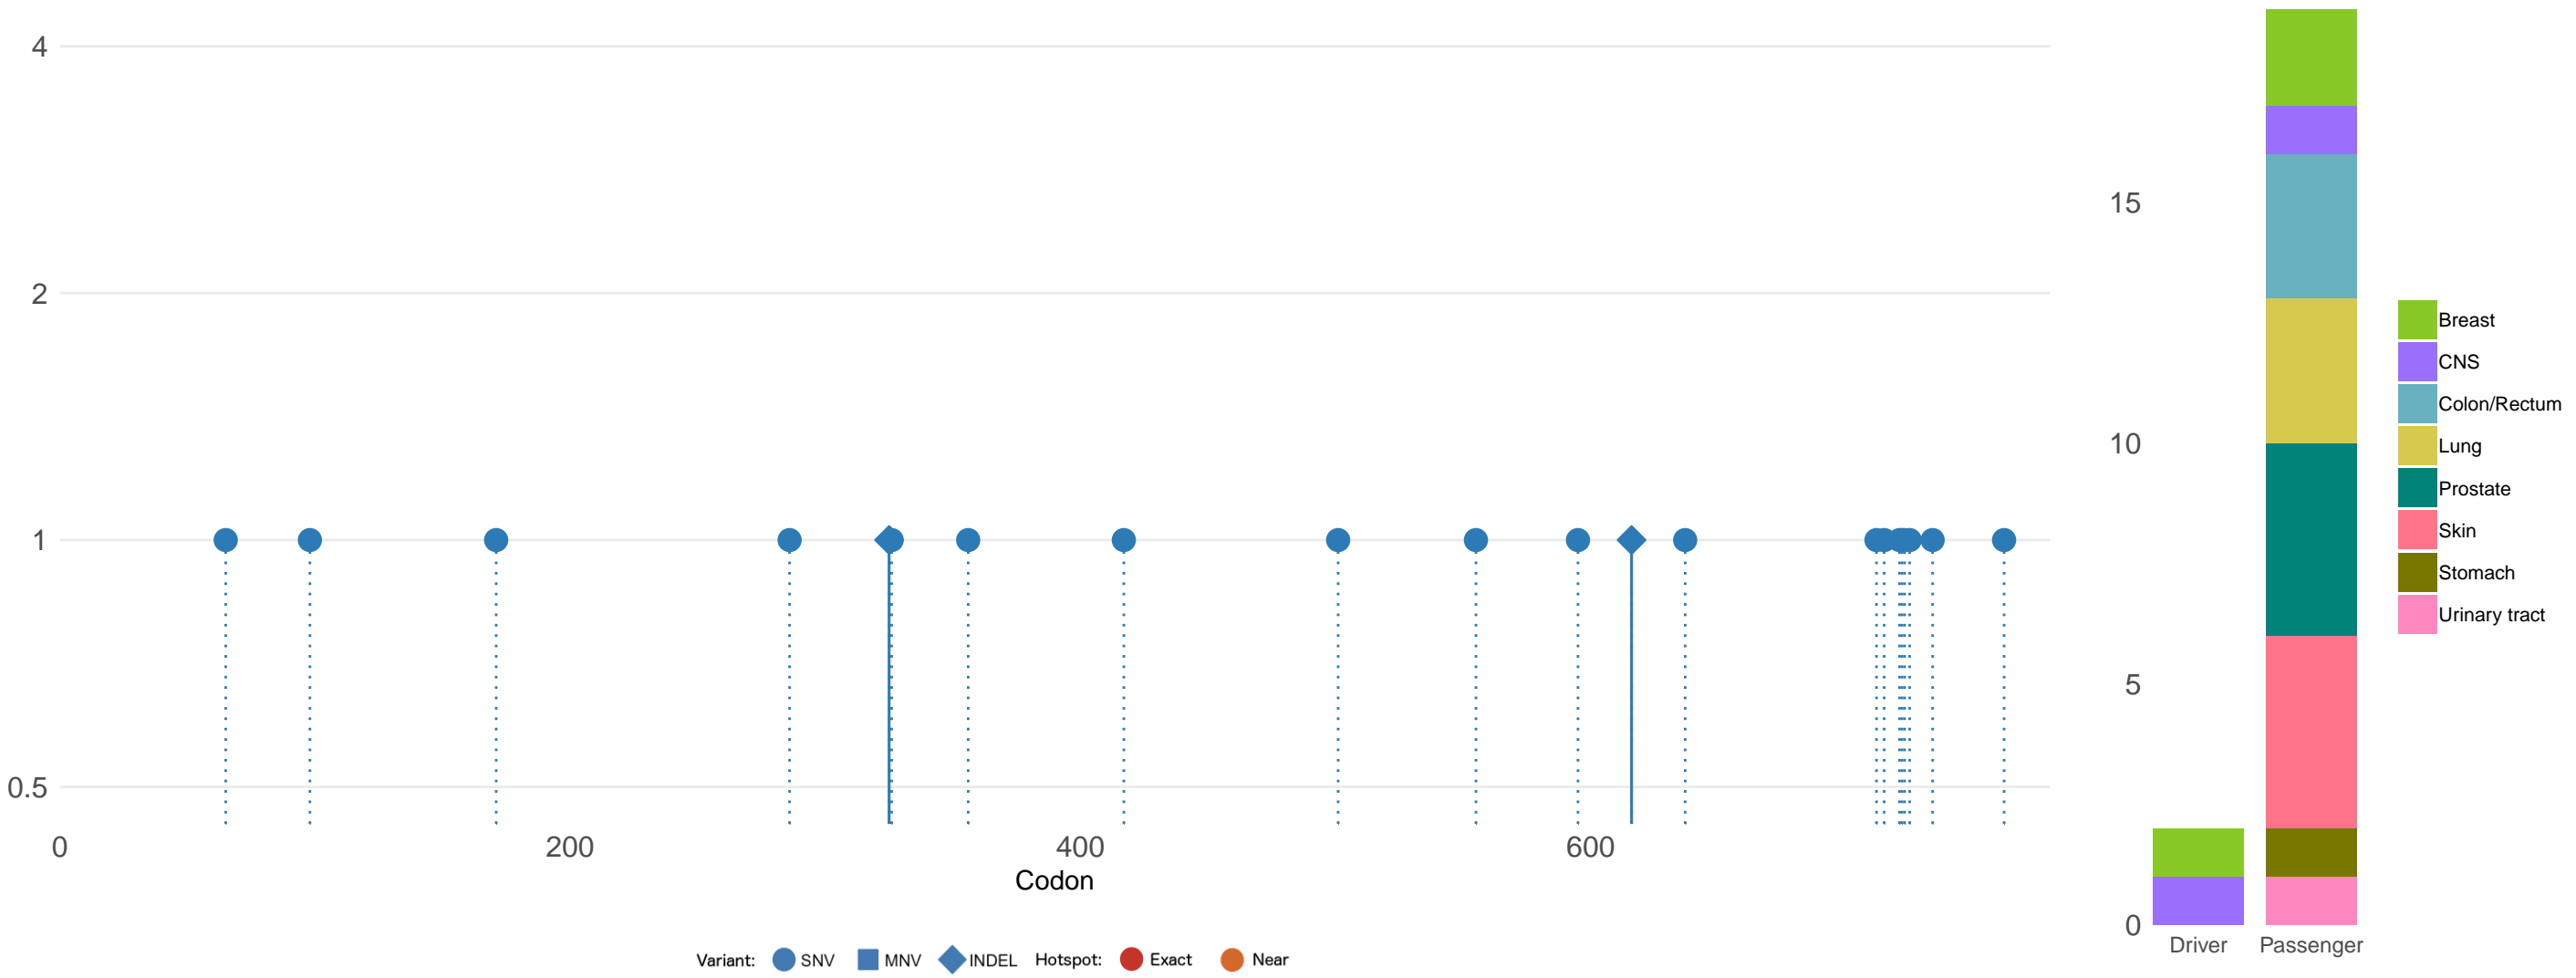

# STAT5B Variants

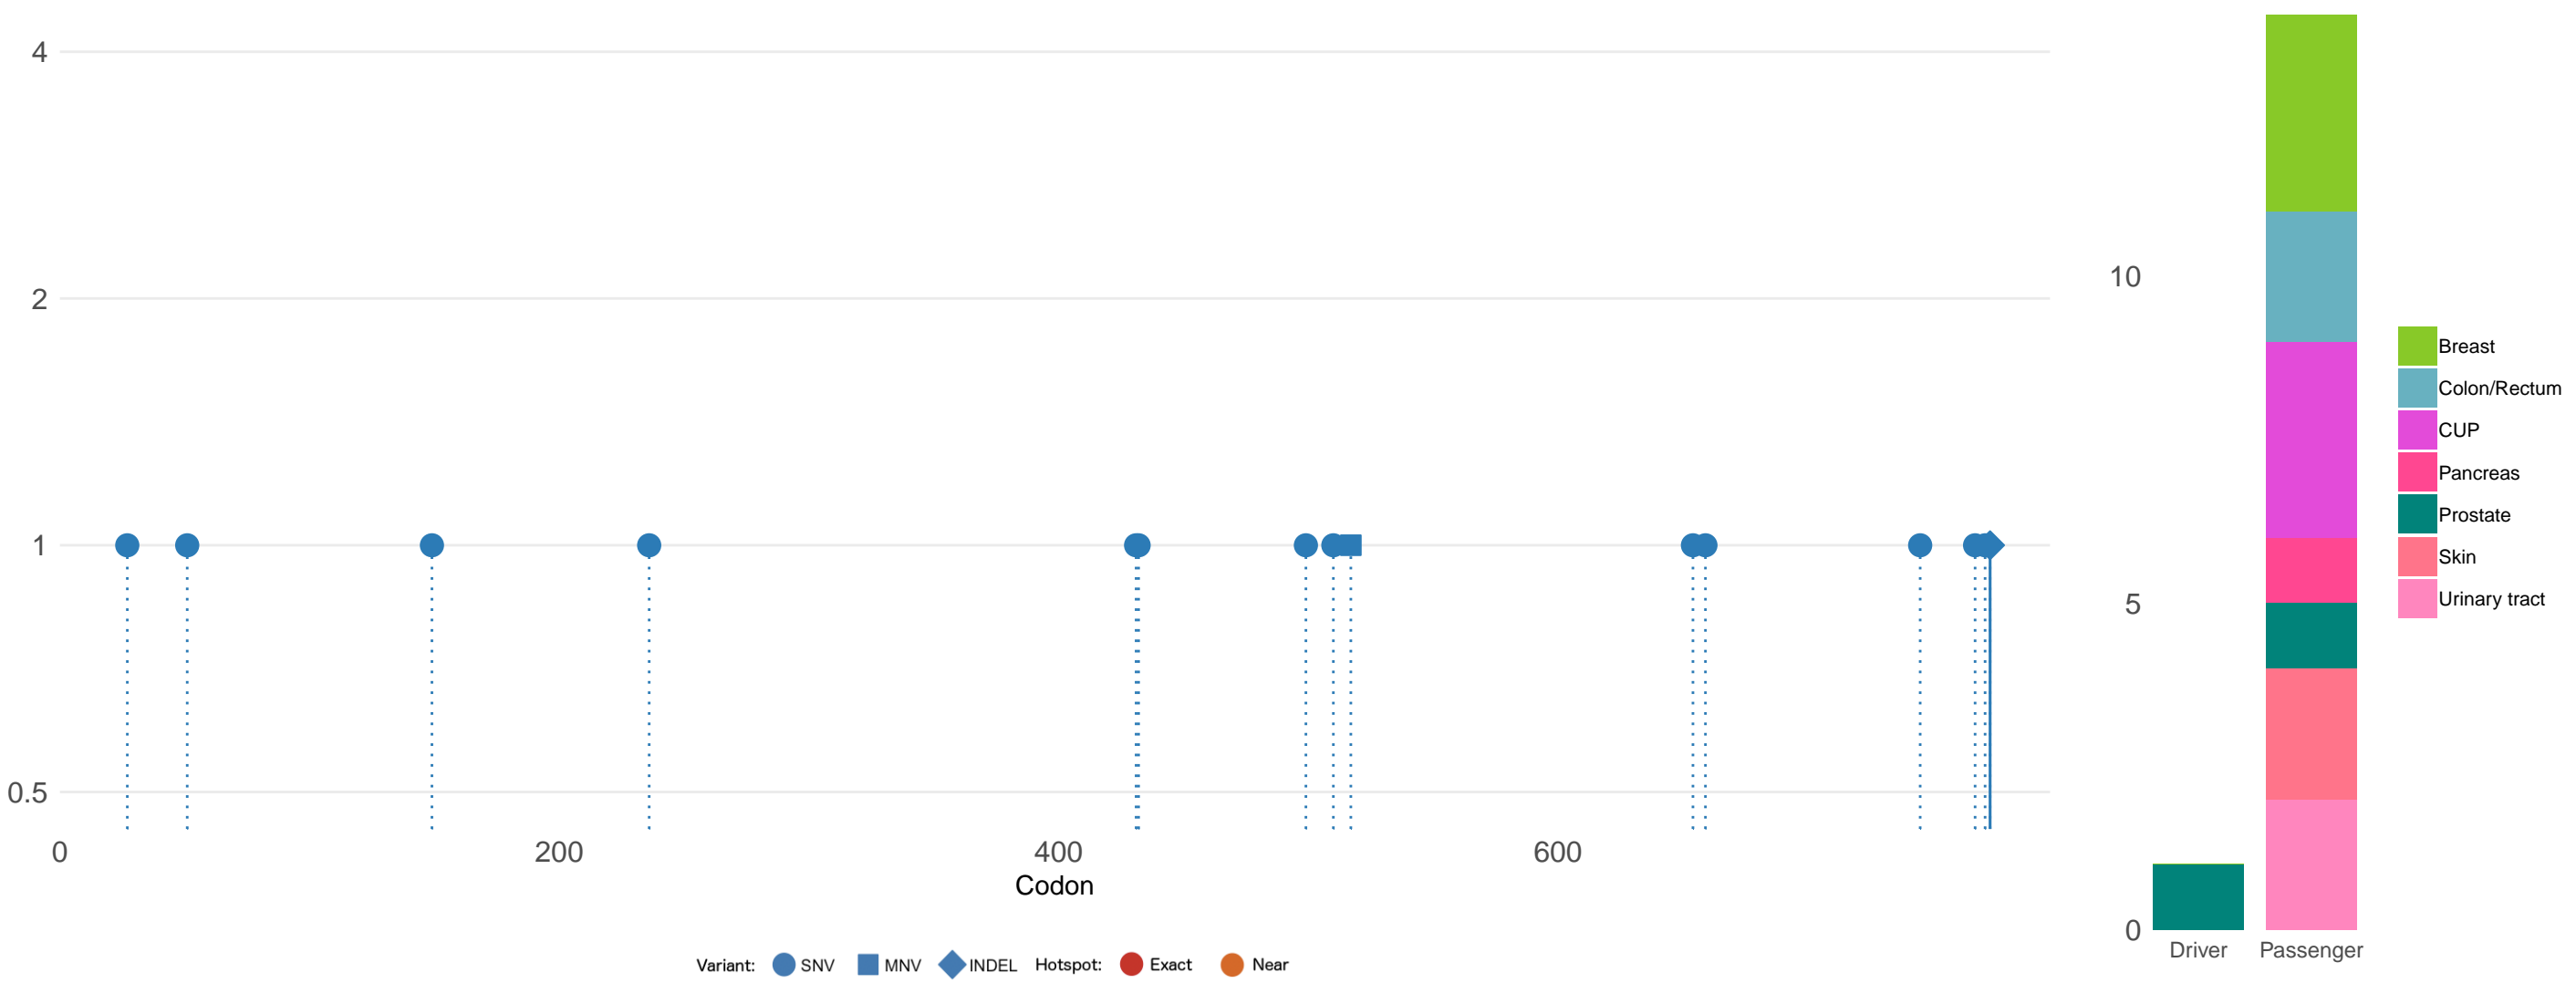

# TERT Variants

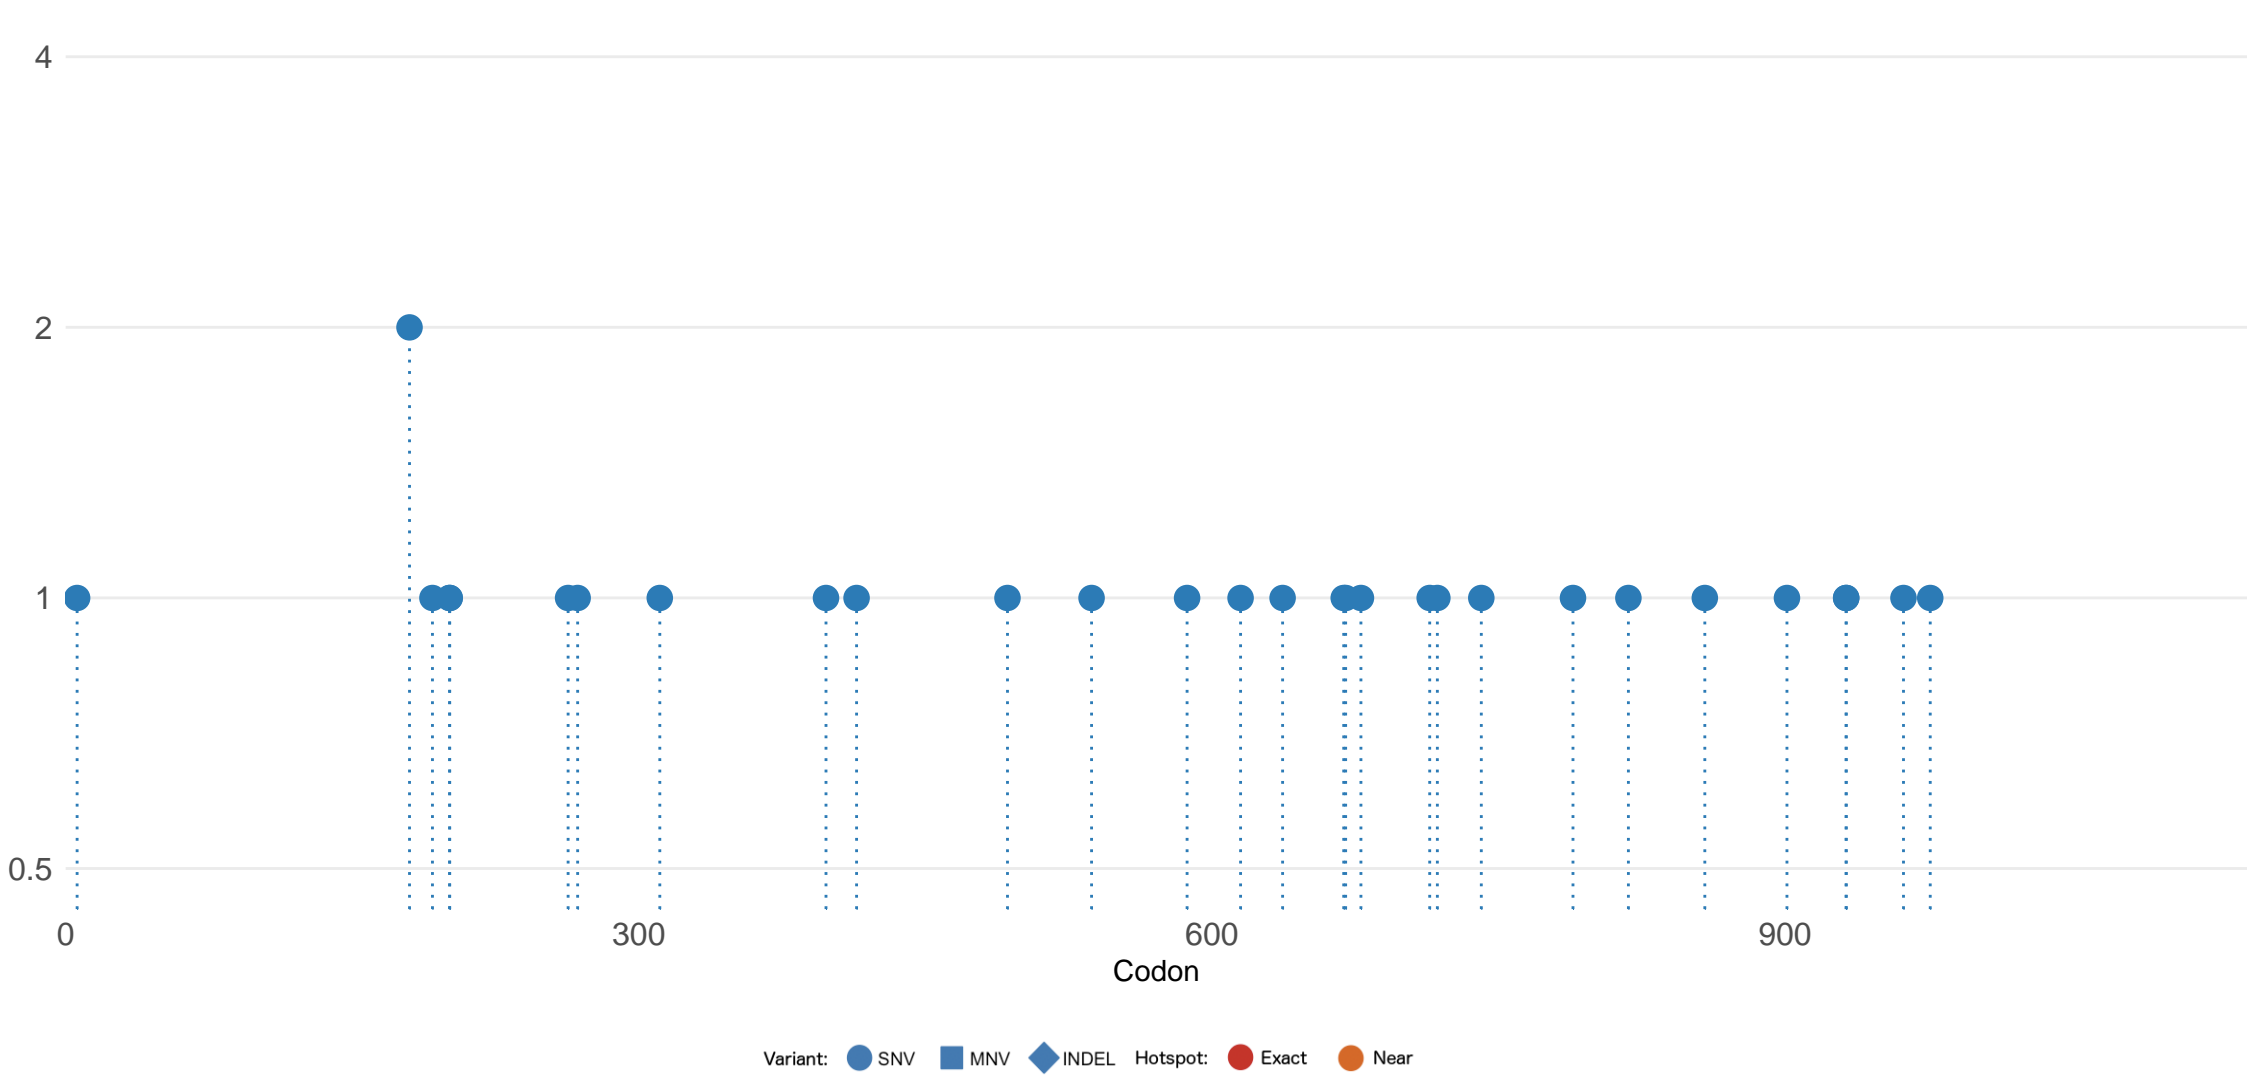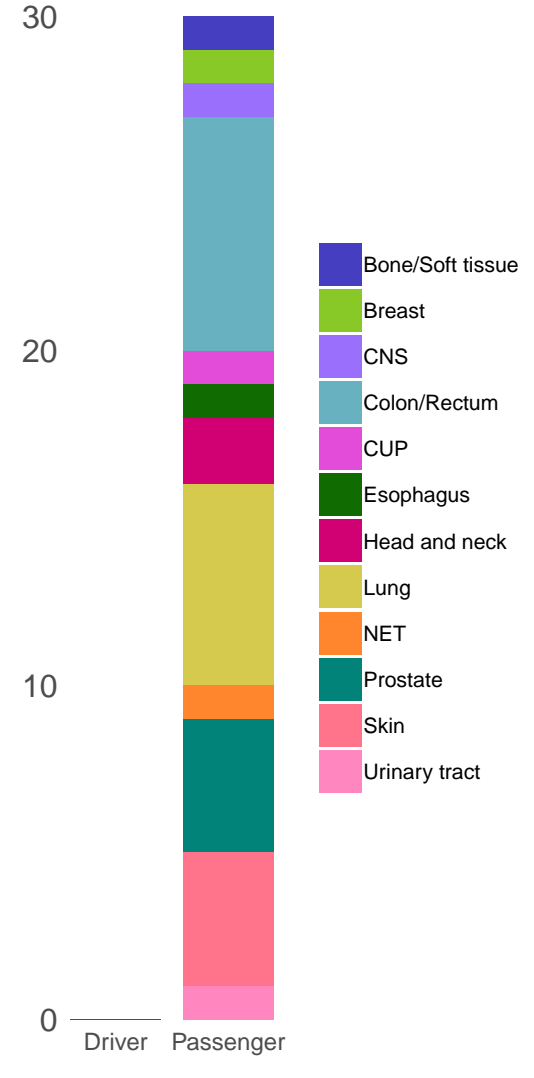

# TOP2A Variants

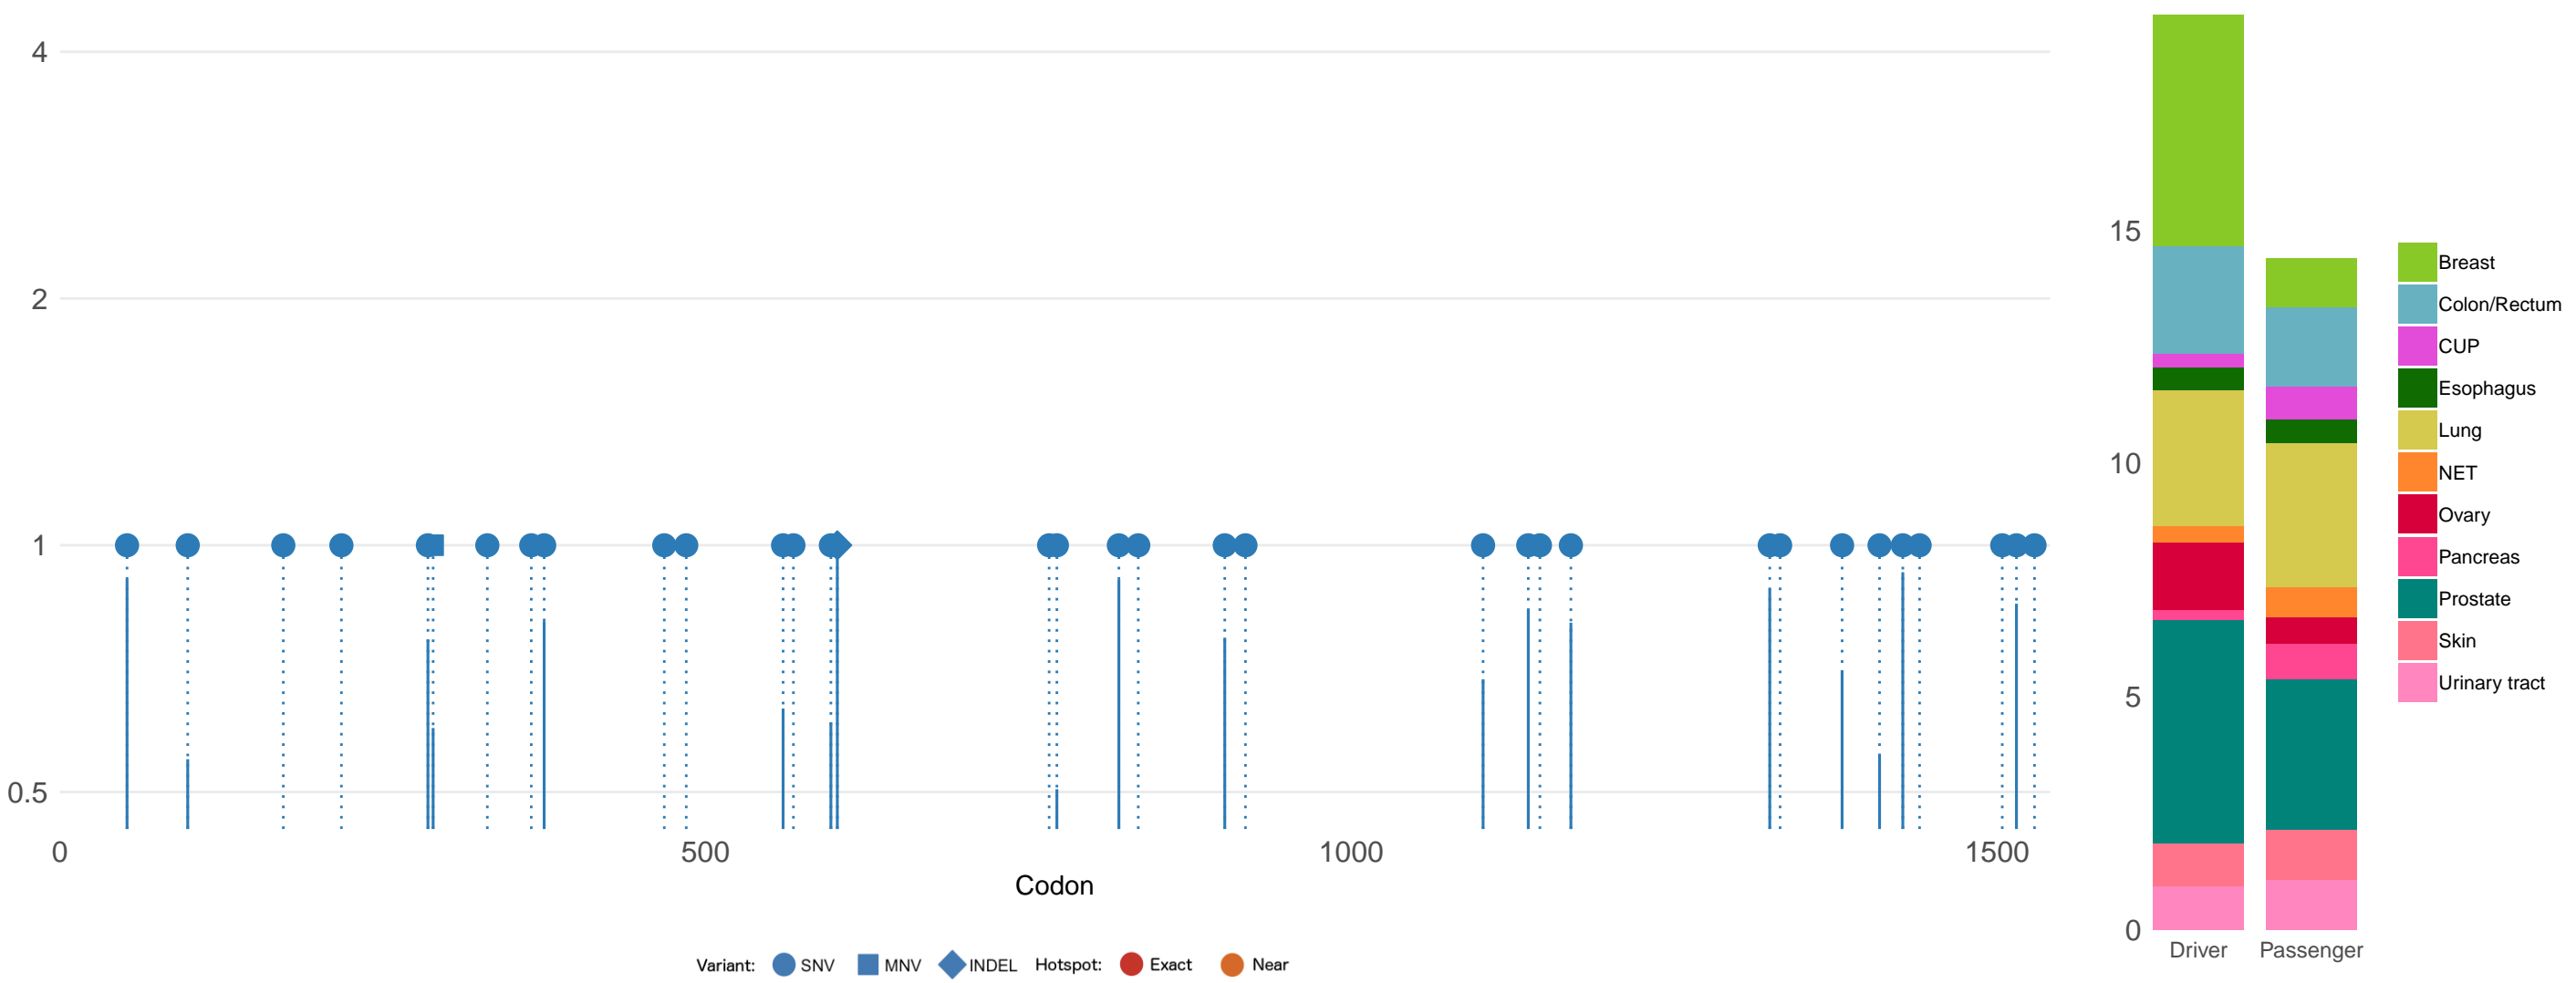



# TSHR Variants

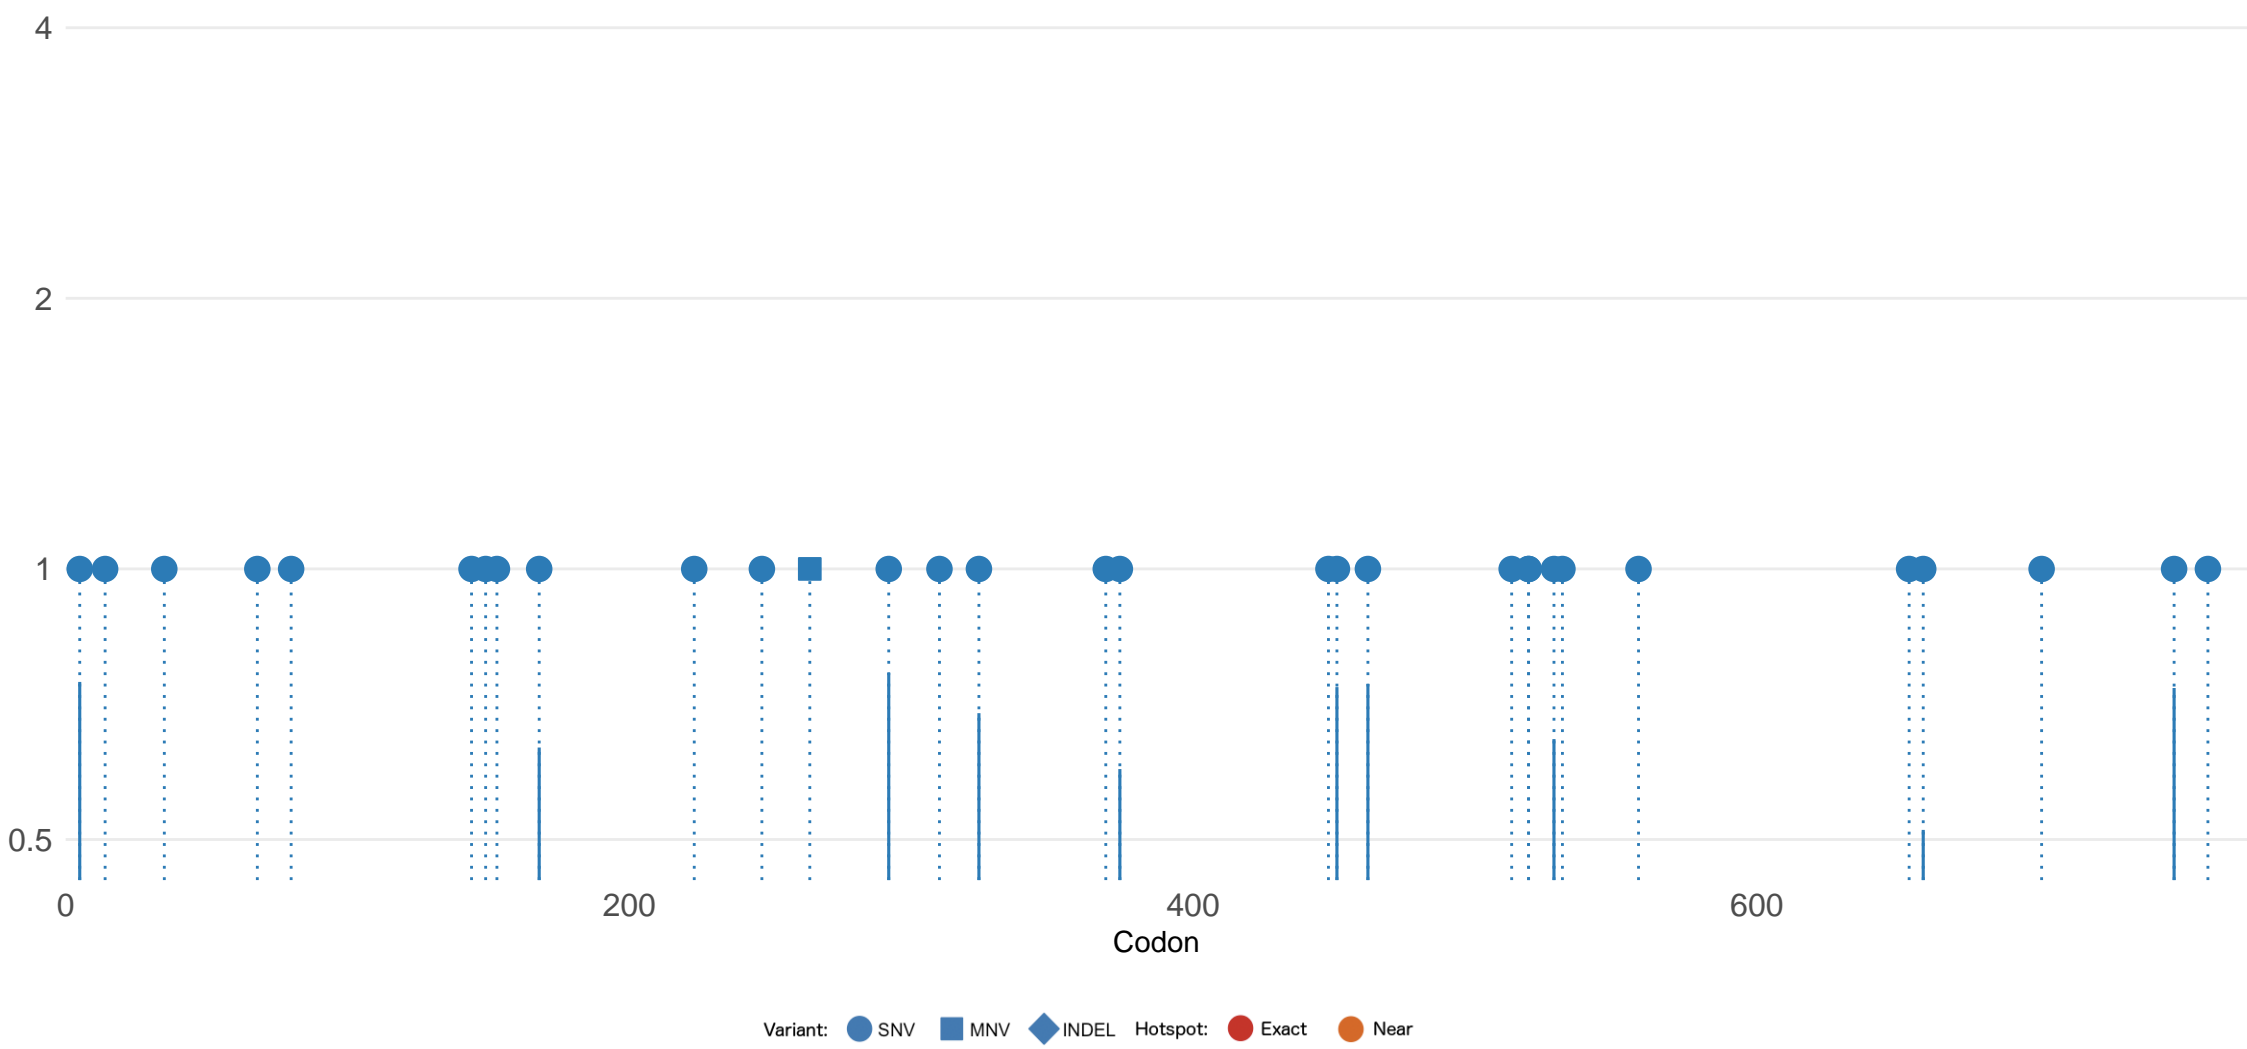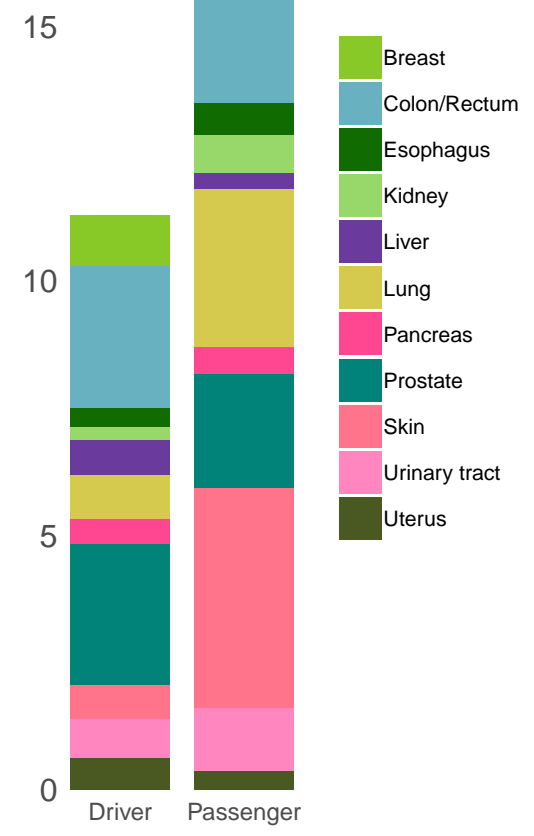

# U2AF1 Variants

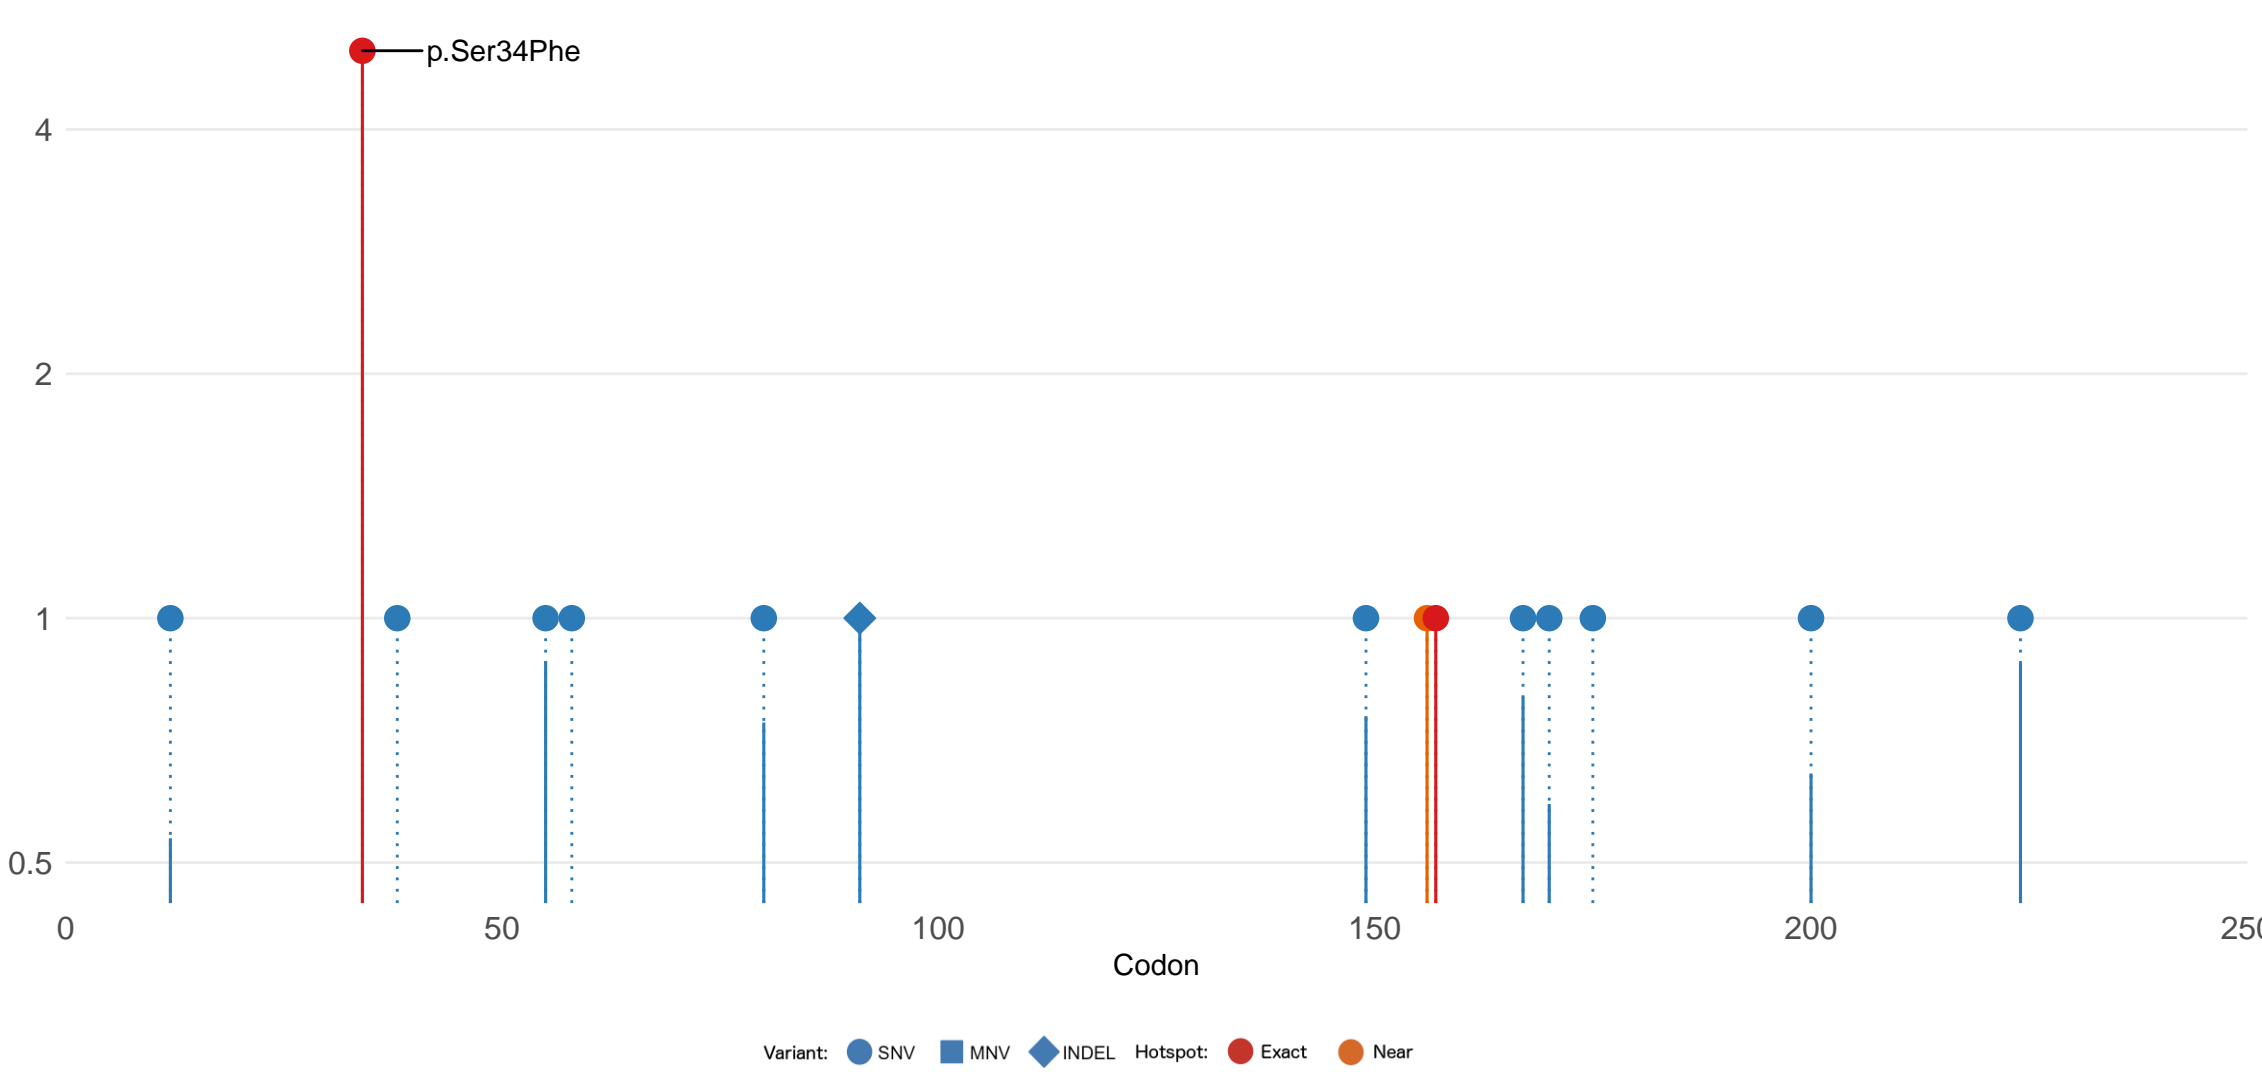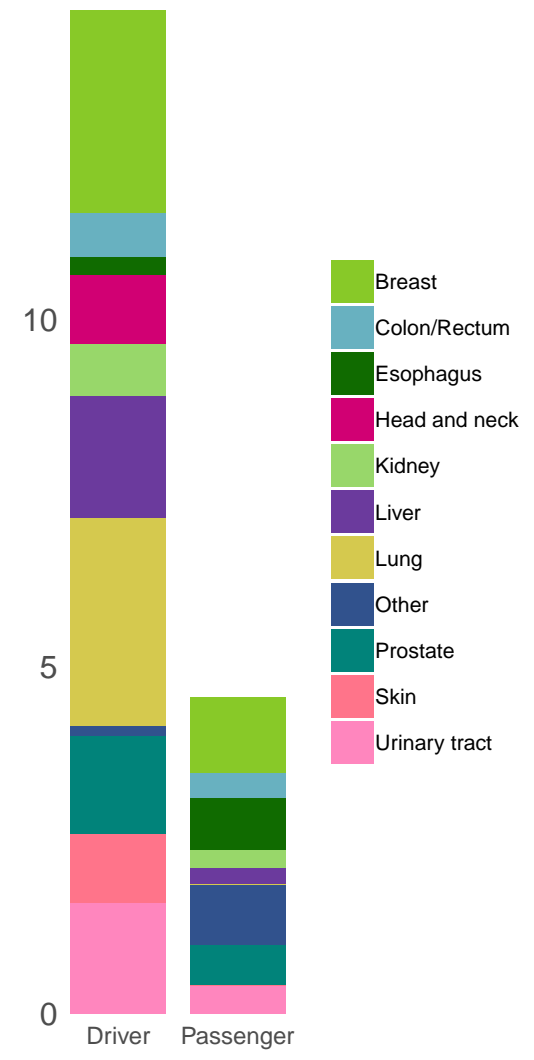

# USP8 Variants

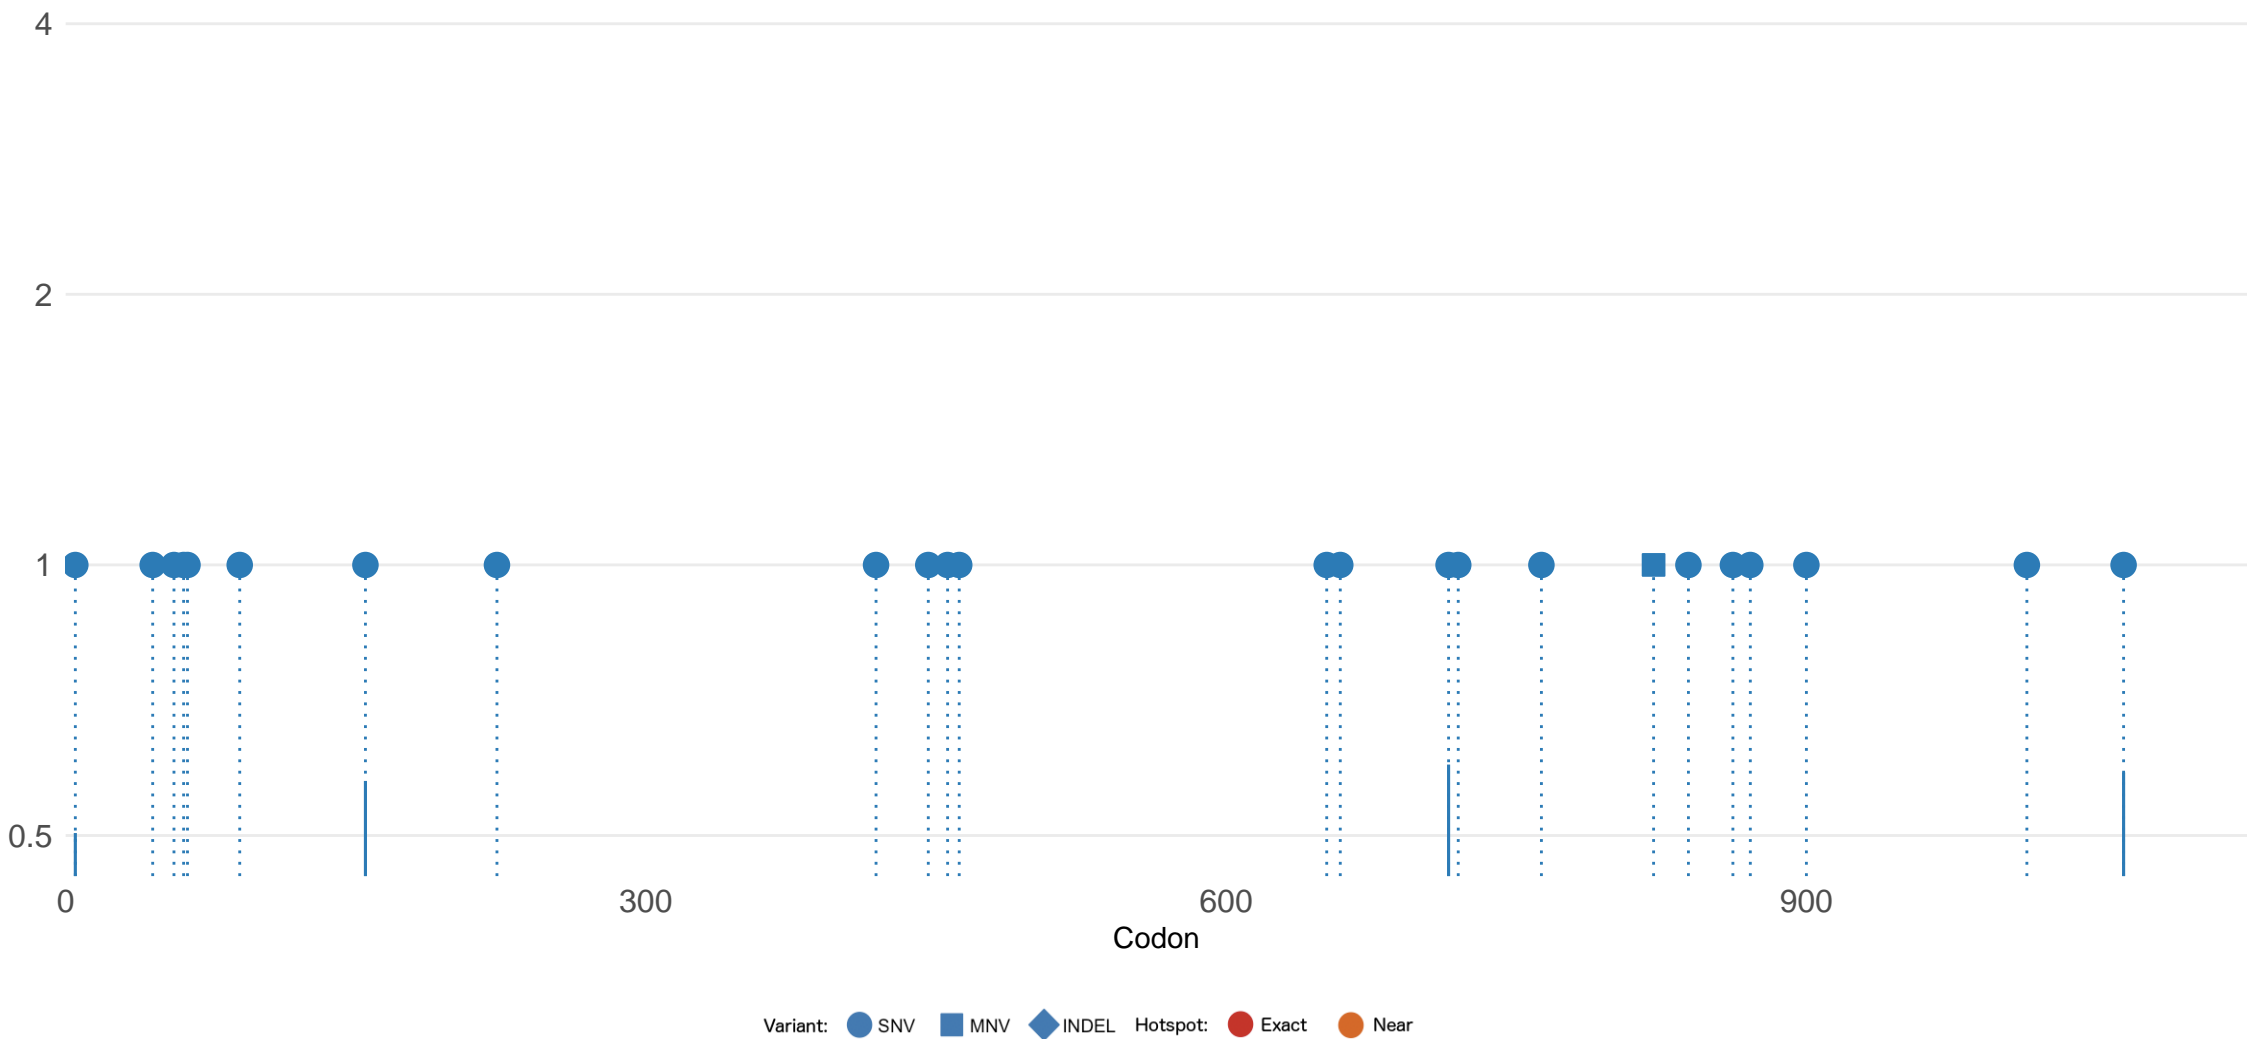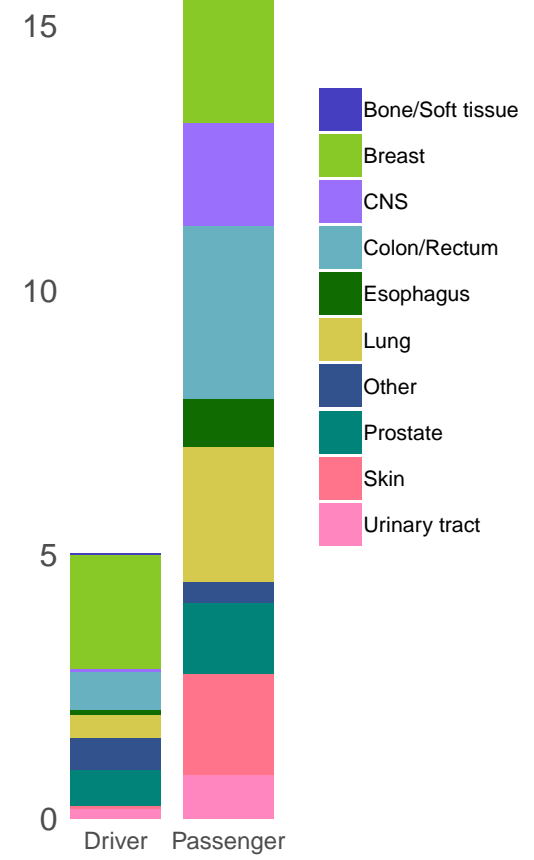

# WT1 Variants

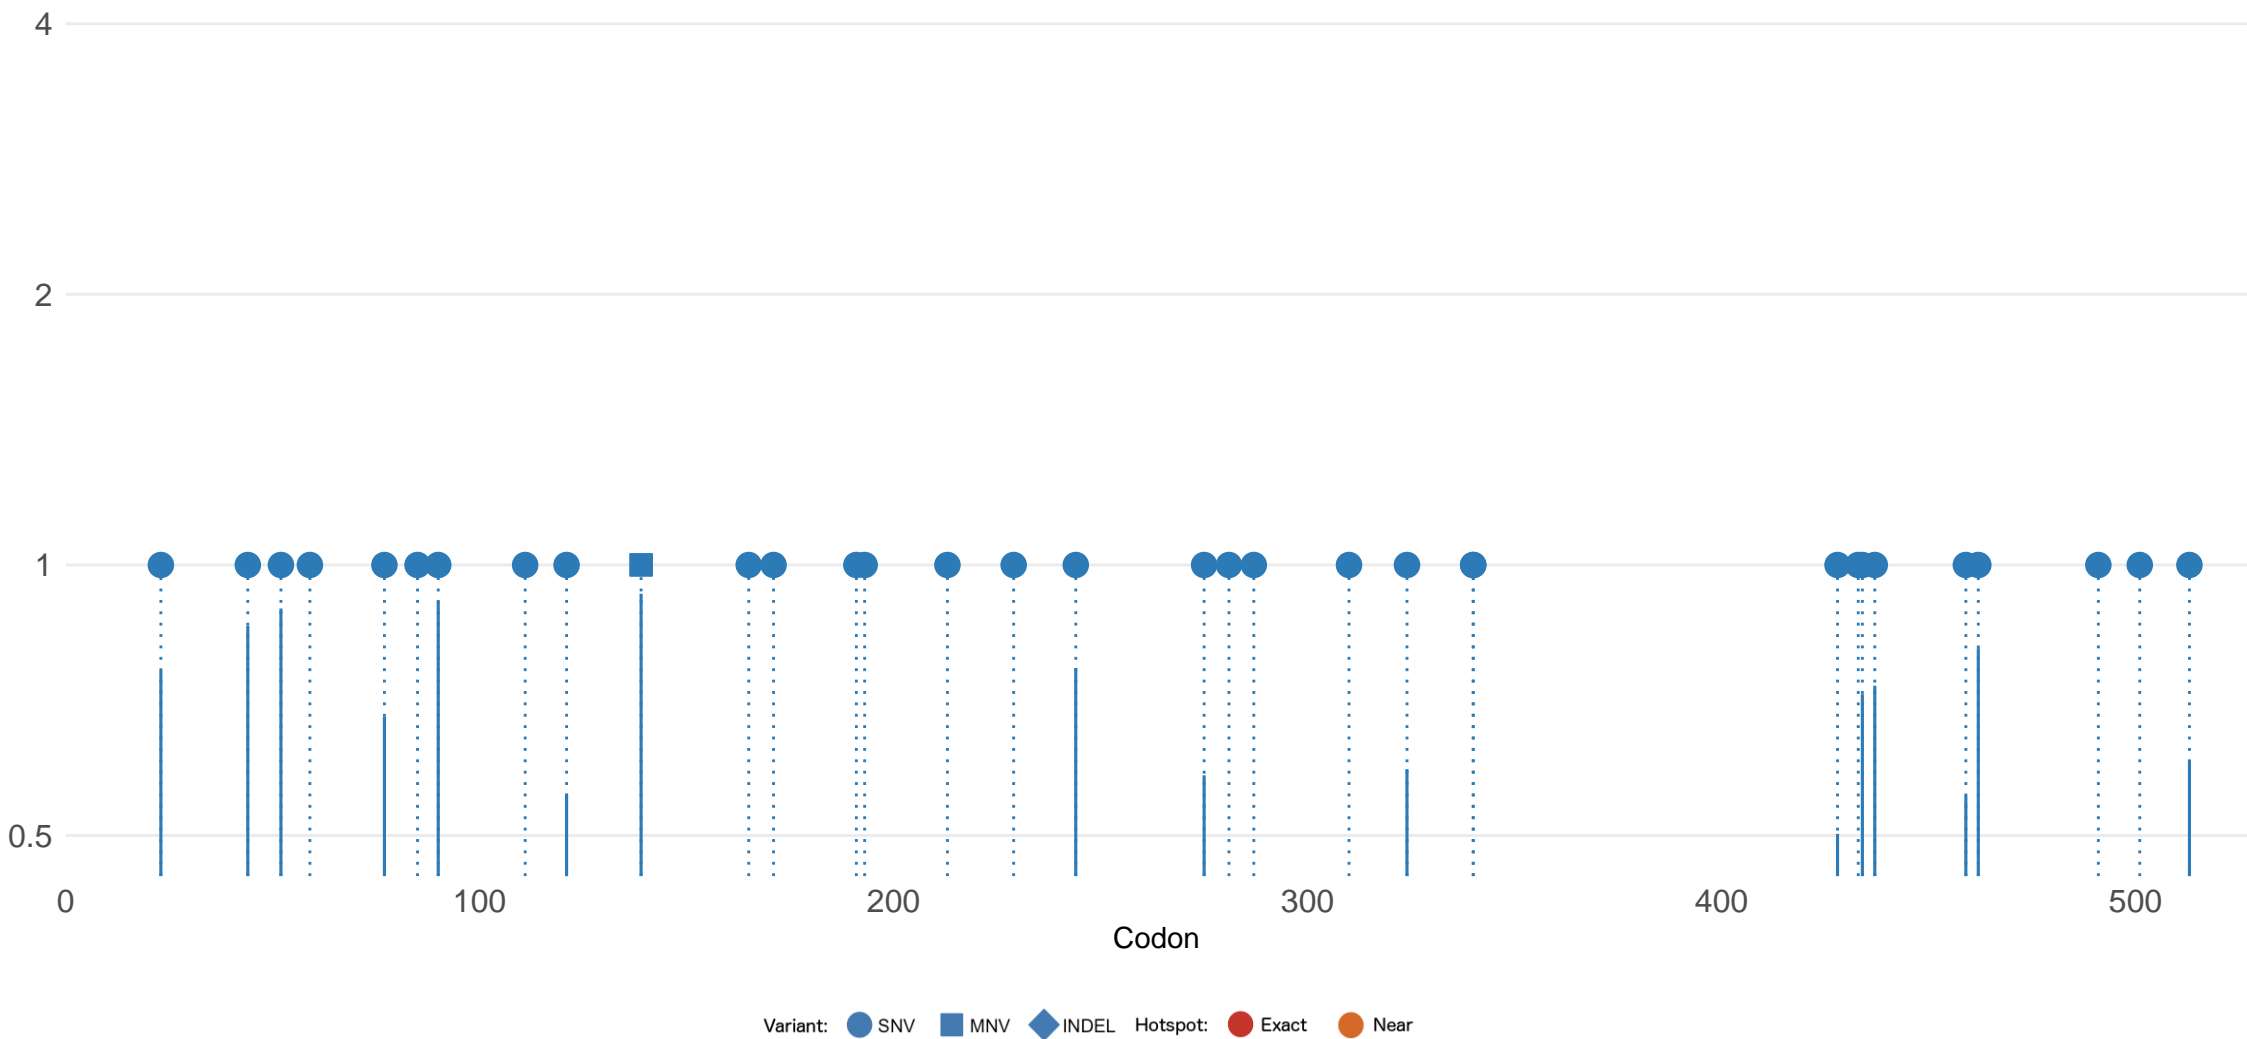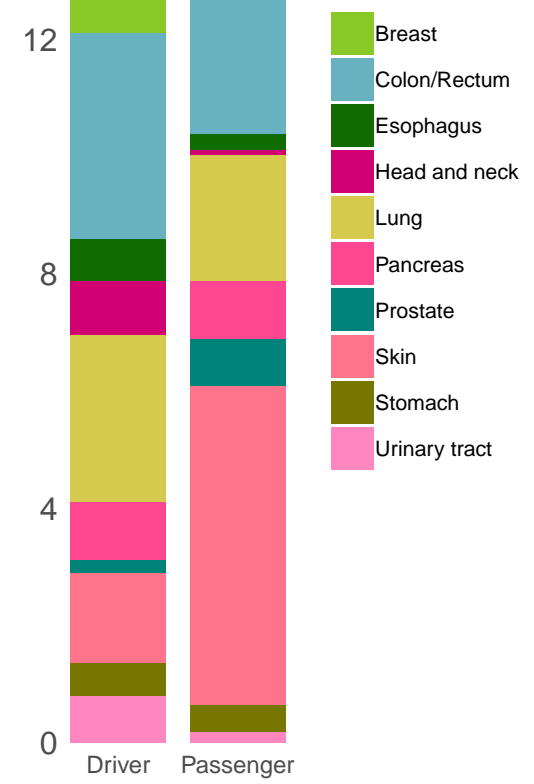

# XPO1 Variants

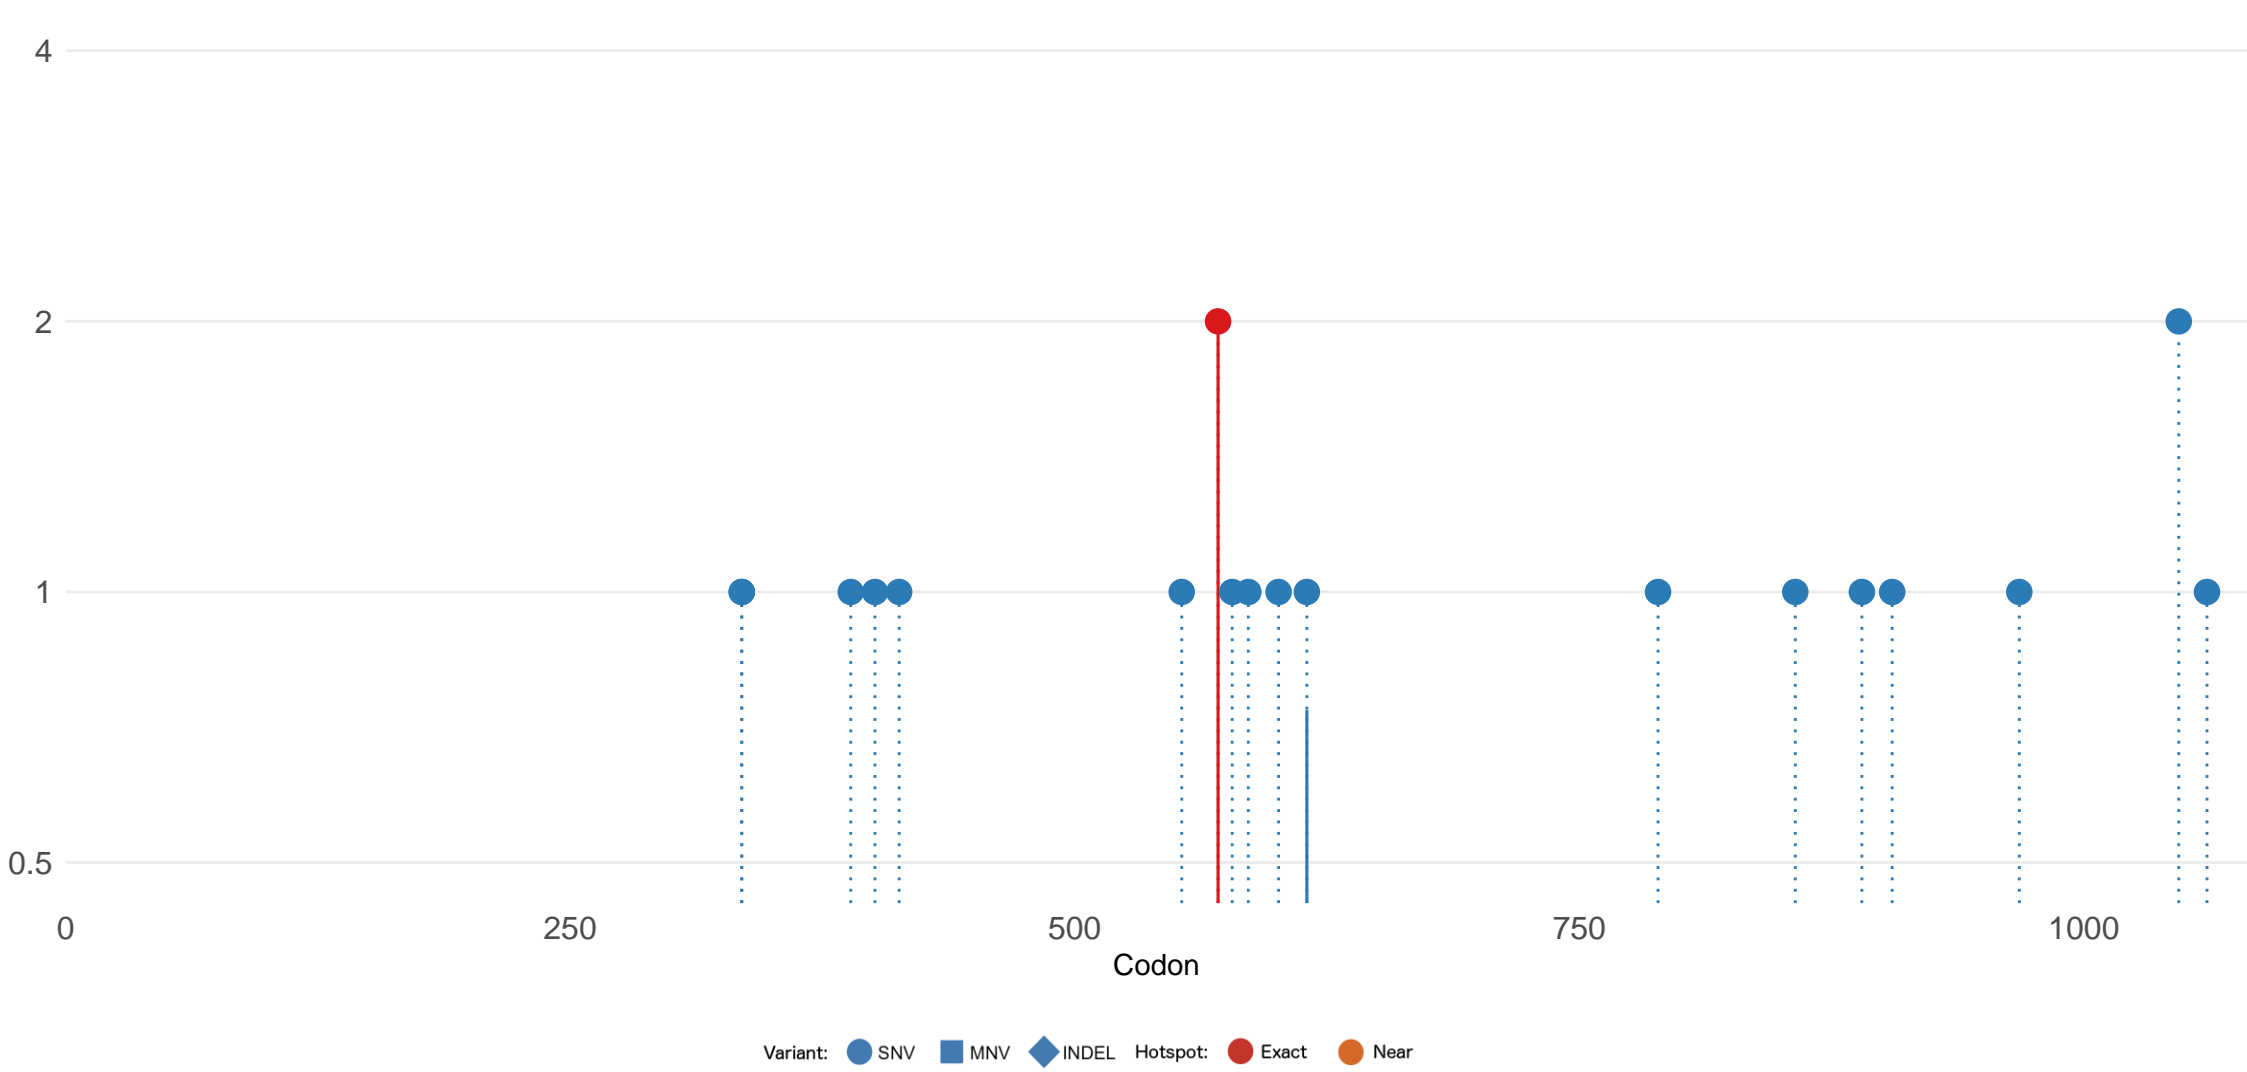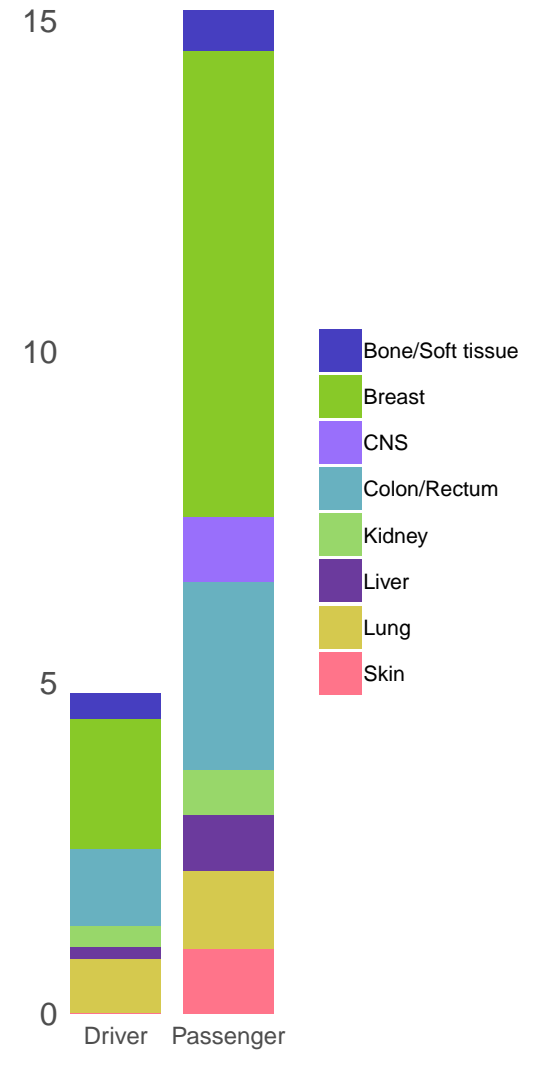

# ZNF750 Variants

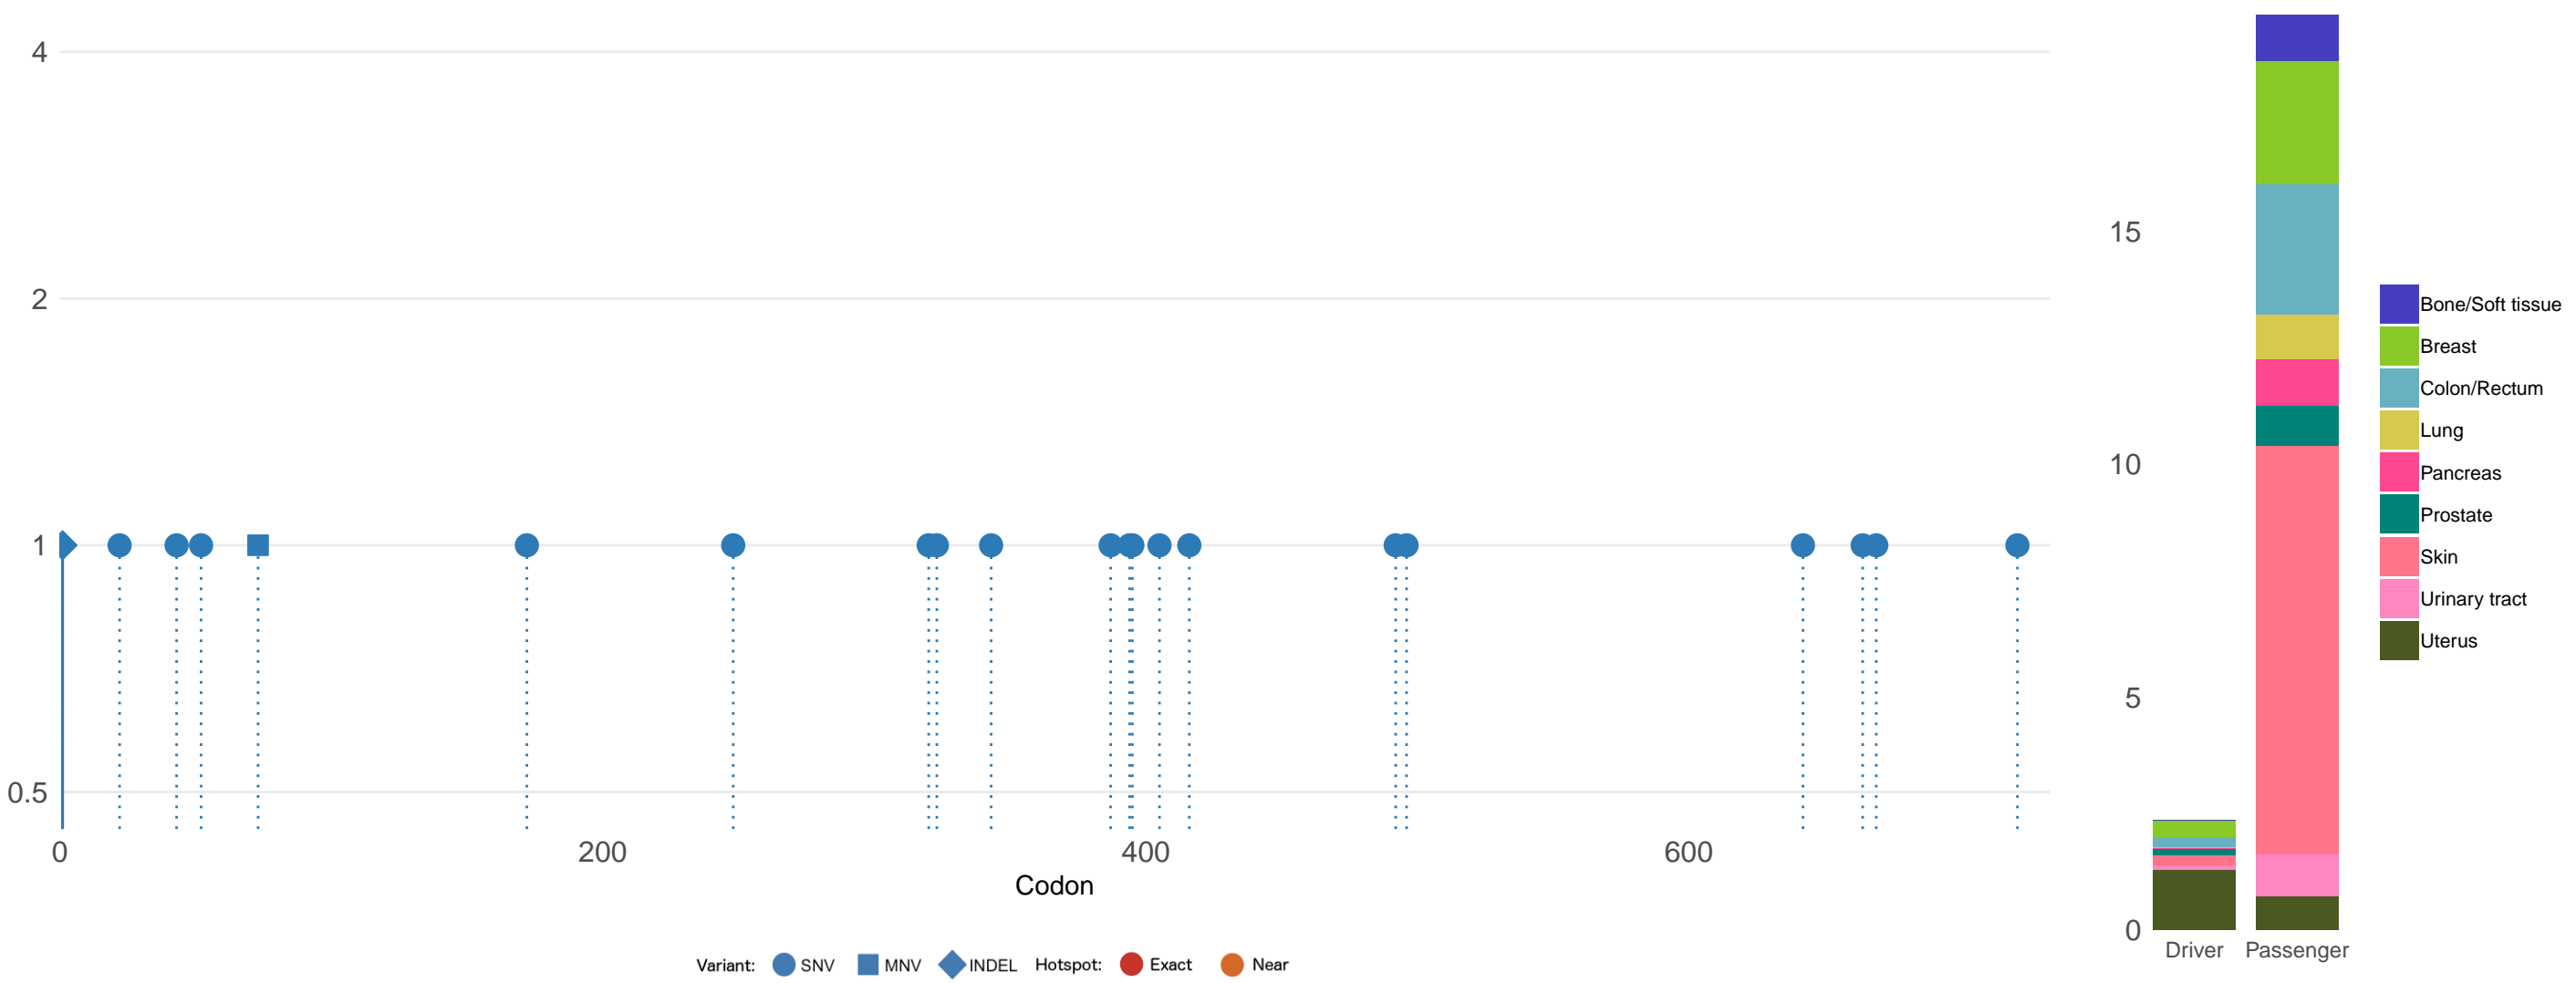

Supplement: Supplementary file [file media-7.pdf]
