# Supplementary material for: Pan-cancer whole genome analyses of metastatic solid tumors
Source: bioRxiv or medRxiv preprint supplement (doi:10.1101/415133), 2019-08-12

# ACVR1B Variants

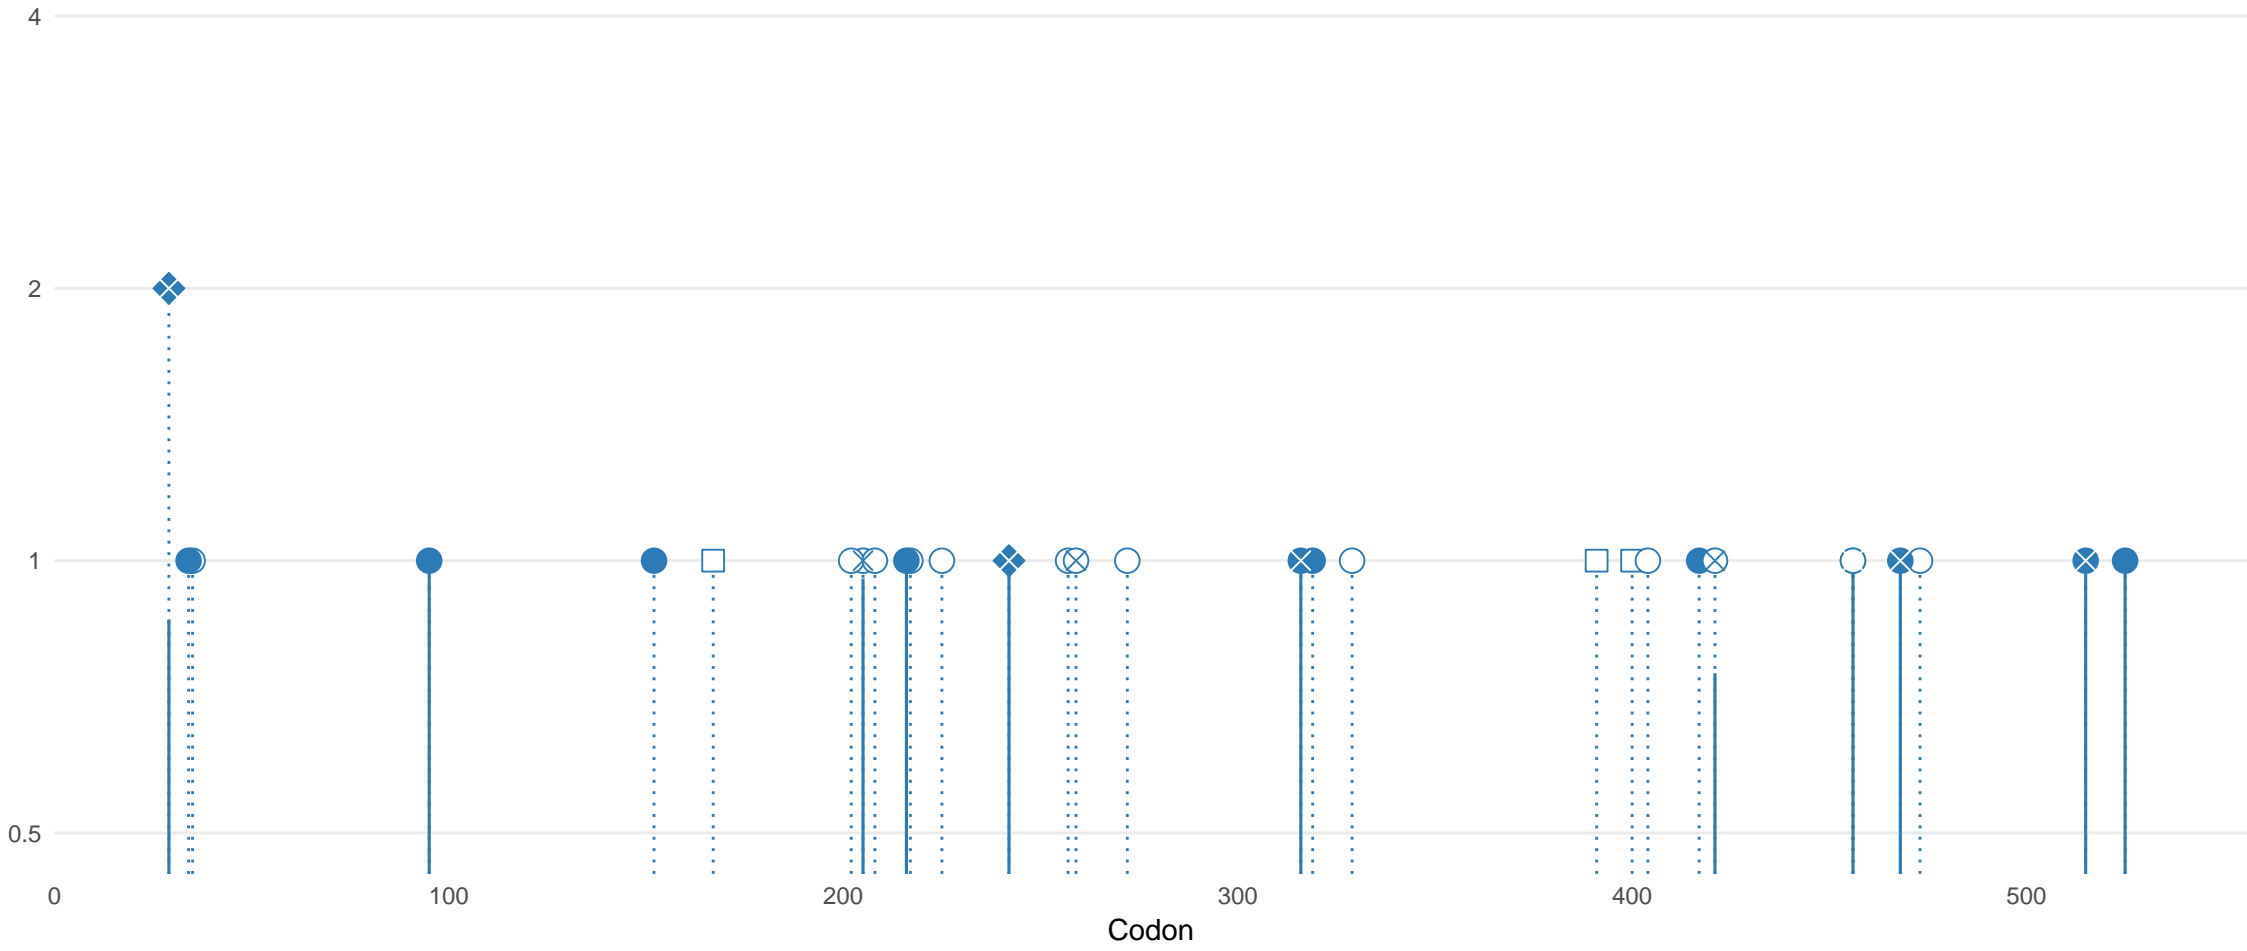

Monoallelic: ○ SNV □ MNV ◇ INDEL in frame ⊗ SNV nonsense ⊗ MNV nonsense ⊗ INDEL out of frame  
 Biallelic/Multihit: ● SNV ■ MNV ◆ INDEL in frame ⊗ SNV nonsense ⊗ MNV nonsense ◆ INDEL out of frame  
 Hotspot: ●

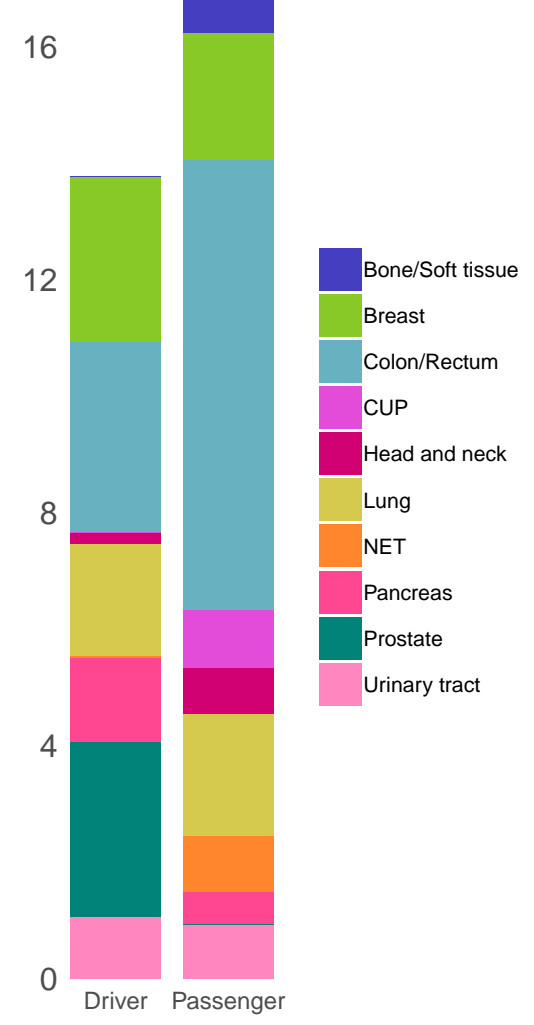

# ACVR2A Variants

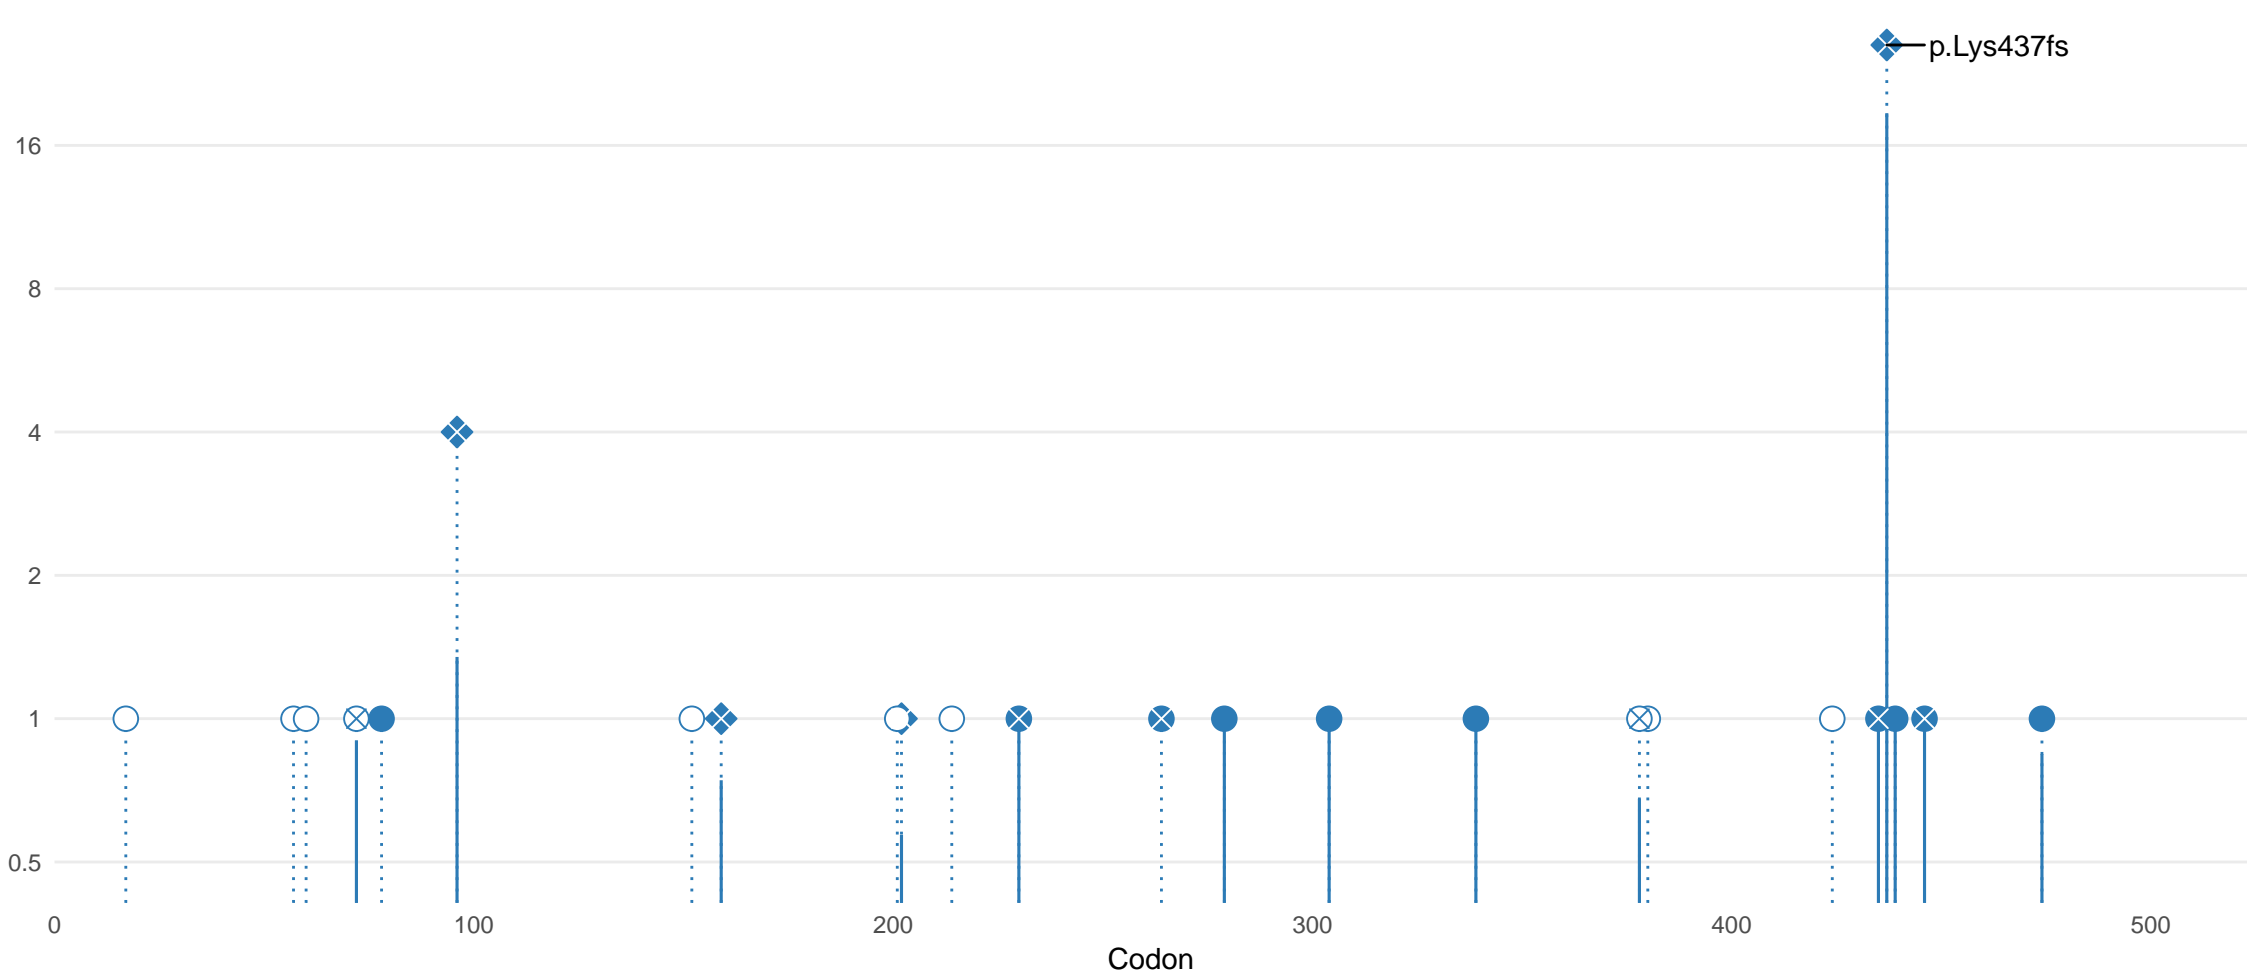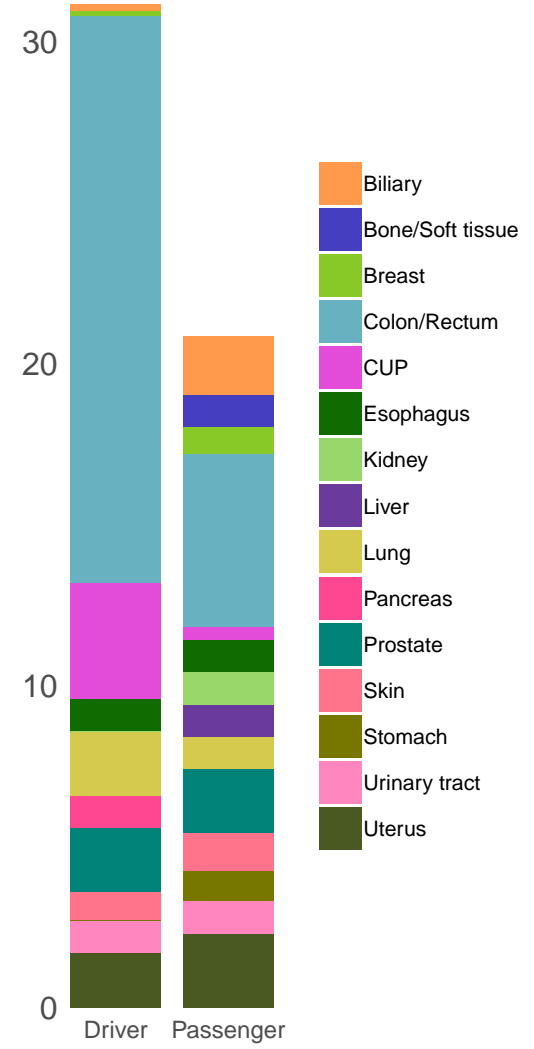

Monoallelic: ○ SNV □ MNV ◇ INDEL in frame ⊗ SNV nonsense ⊗ MNV nonsense ⊗ INDEL out of frame  
 Biallelic/Multihit: ● SNV ■ MNV ◆ INDEL in frame ⊗ SNV nonsense ⊗ MNV nonsense ◆ INDEL out of frame Hotspot: ●

# AJUBA Variants

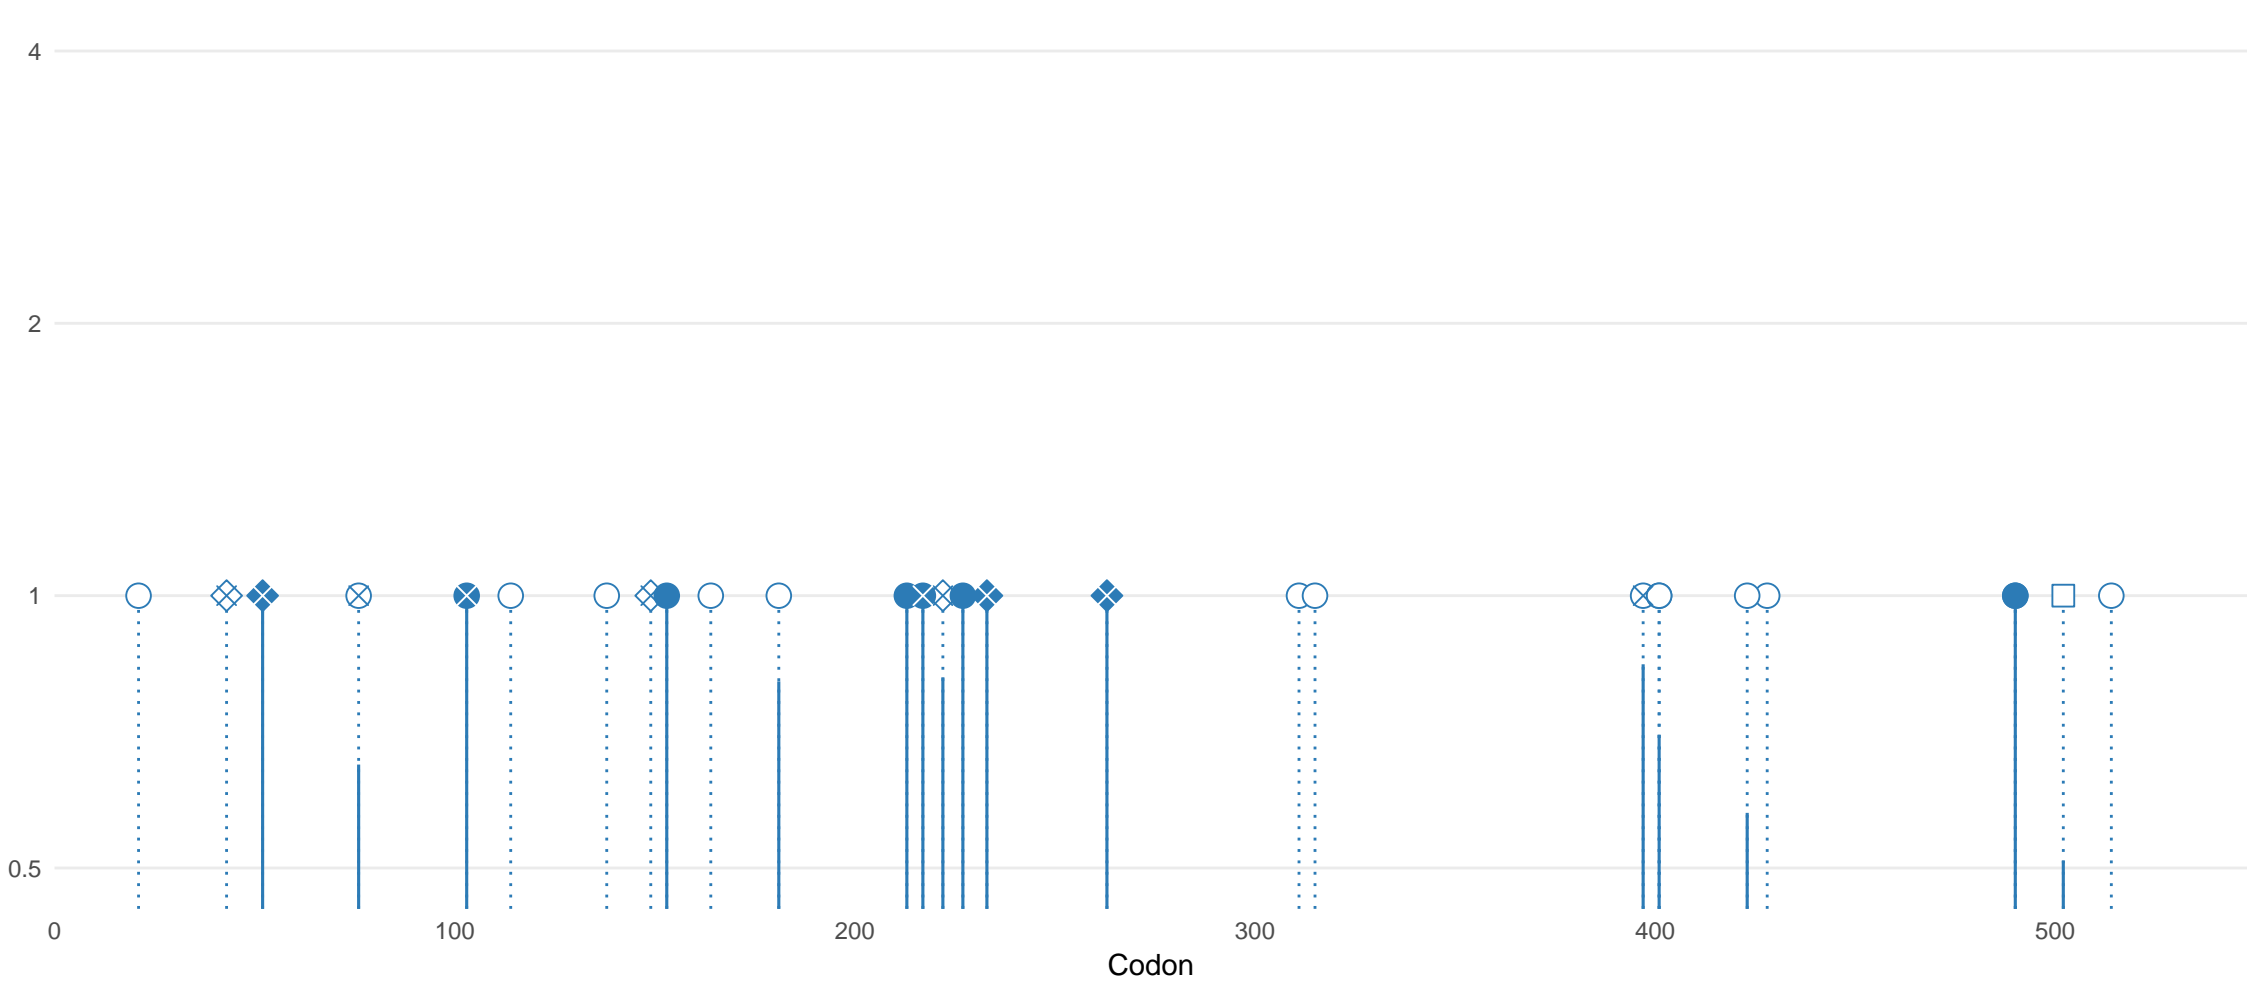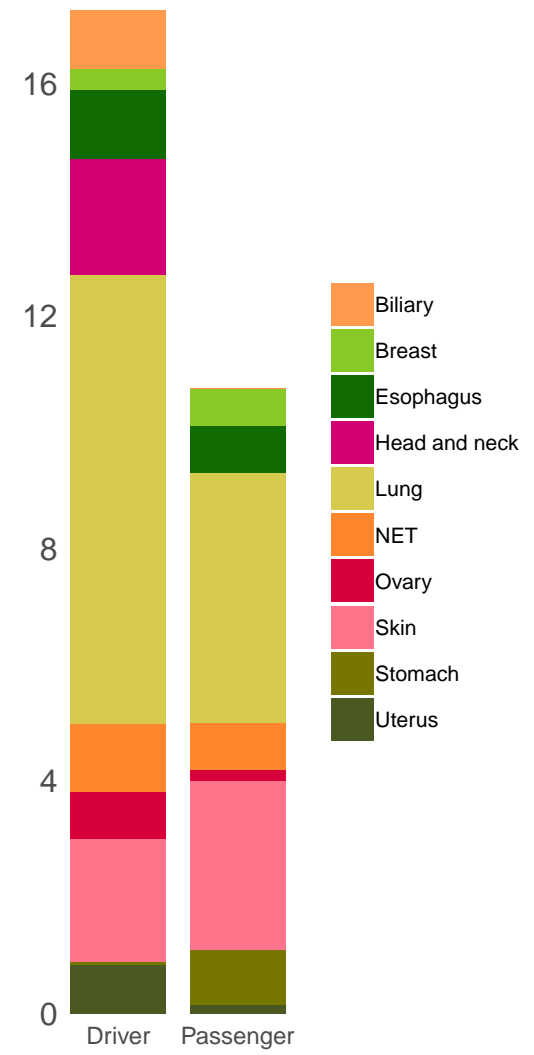

Monoallelic: ○ SNV □ MNV ◇ INDEL in frame ⊗ SNV nonsense ⊗ MNV nonsense ⊗ INDEL out of frame  
 Biallelic/Multihit: ● SNV ■ MNV ◆ INDEL in frame ⊗ SNV nonsense ⊗ MNV nonsense ◆ INDEL out of frame  
 Hotspot: ●

# AMER1 Variants

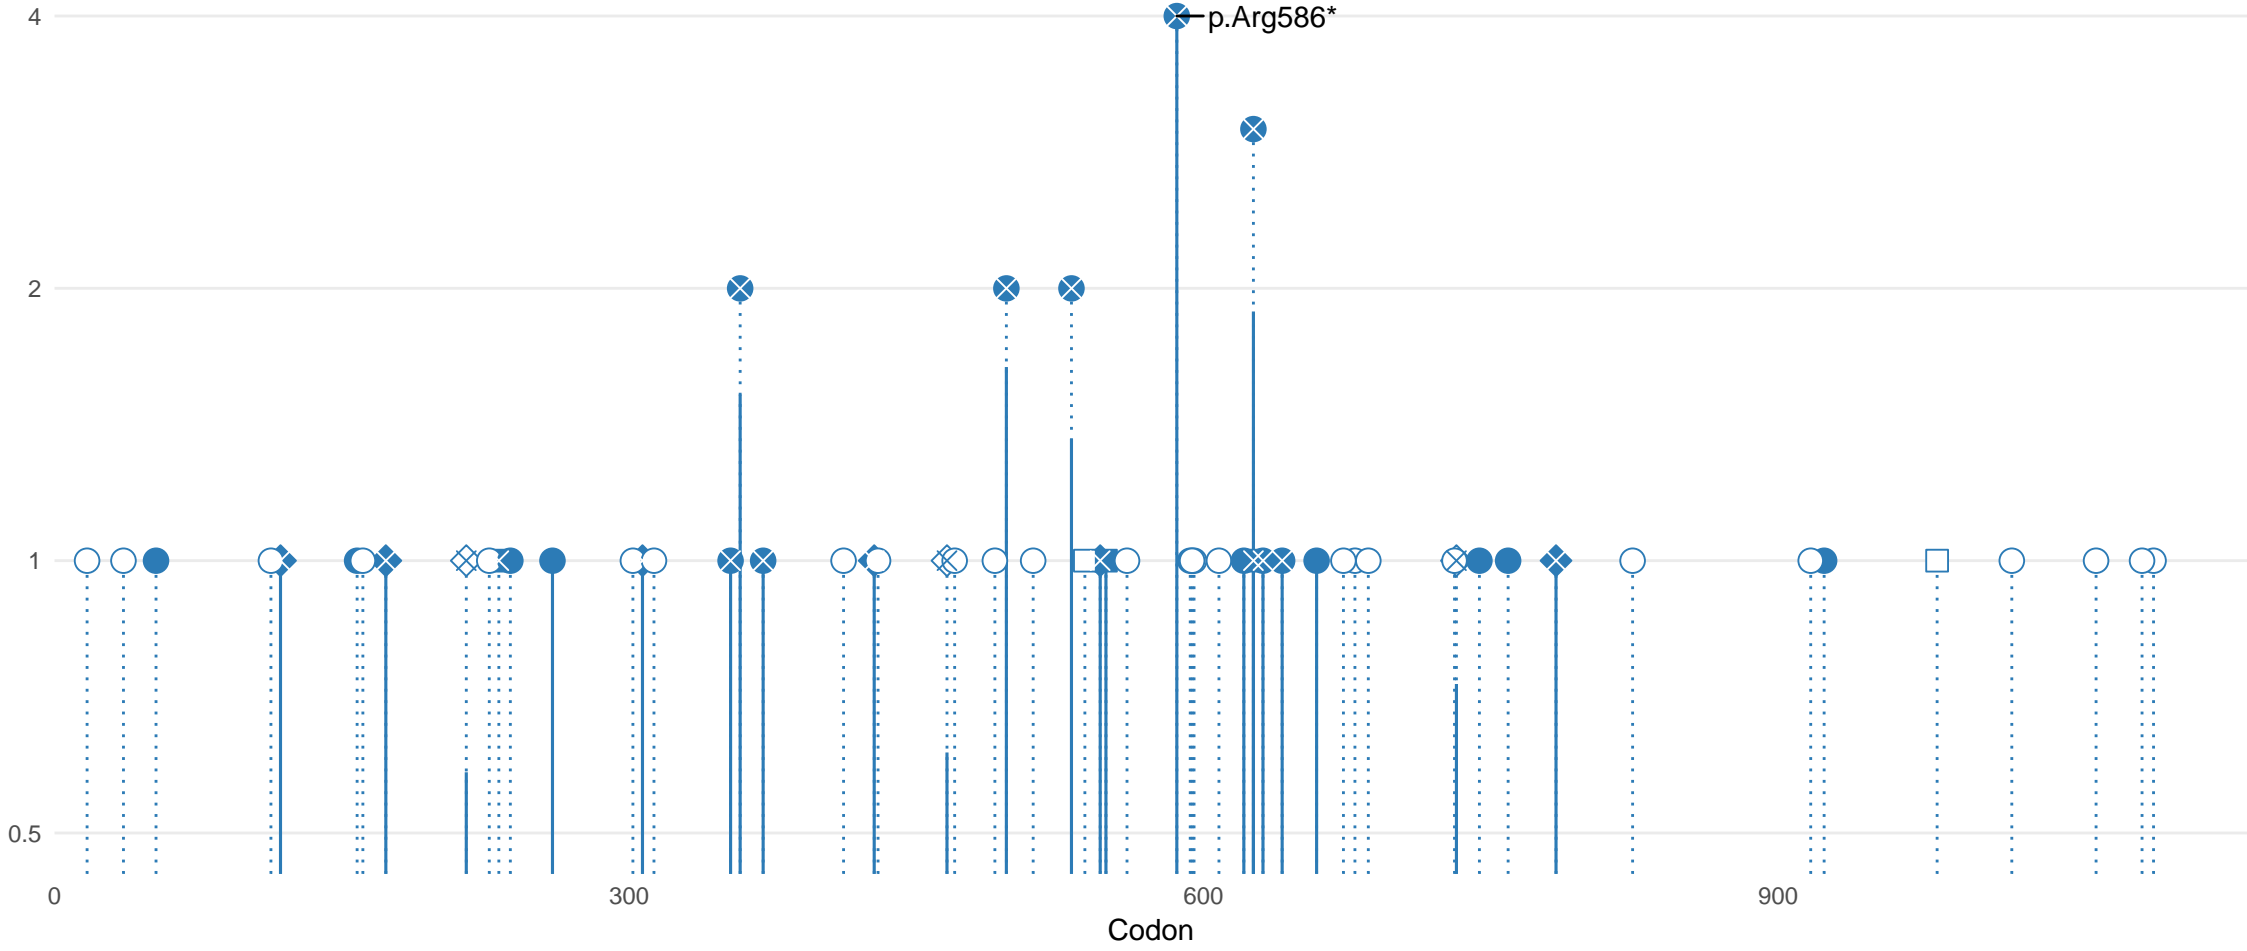

**Monoallelic:** ○ SNV □ MNV ◇ INDEL in frame ⊗ SNV nonsense ⊗ MNV nonsense ⊗ INDEL out of frame  
**Biallelic/Multihit:** ● SNV ■ MNV ◆ INDEL in frame ⊗ SNV nonsense ⊗ MNV nonsense ◆ INDEL out of frame  
**Hotspot:** ●

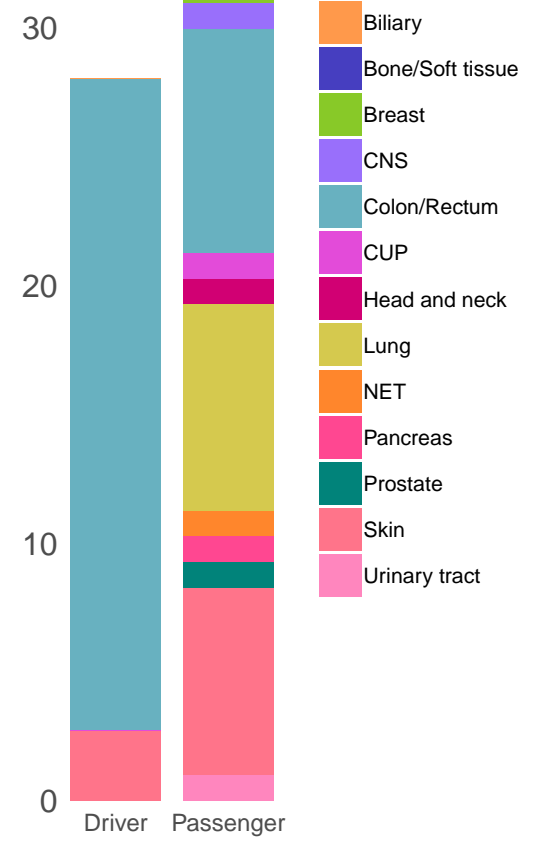

# APC Variants

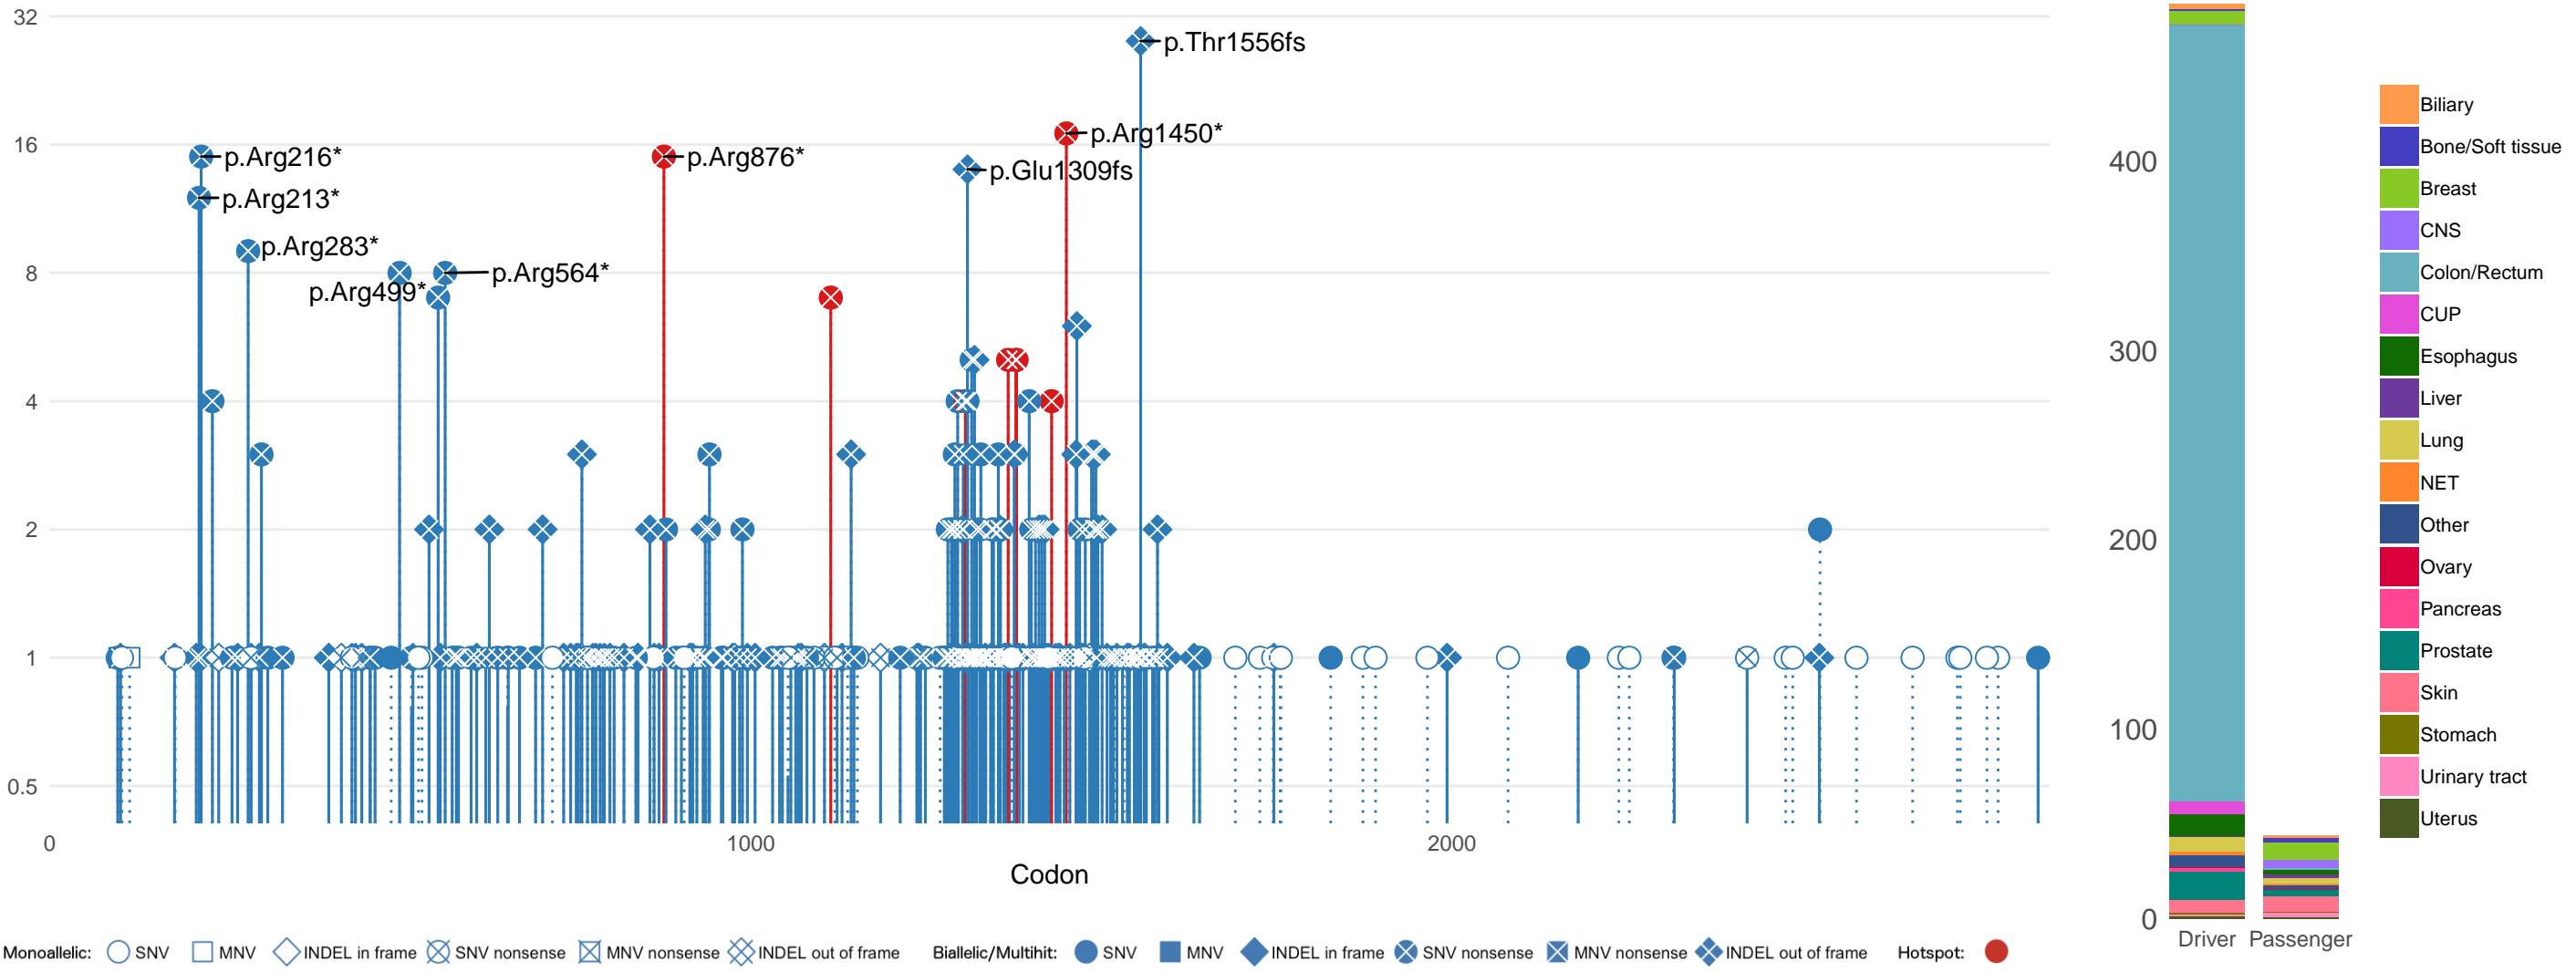

# ARHGAP35 Variants

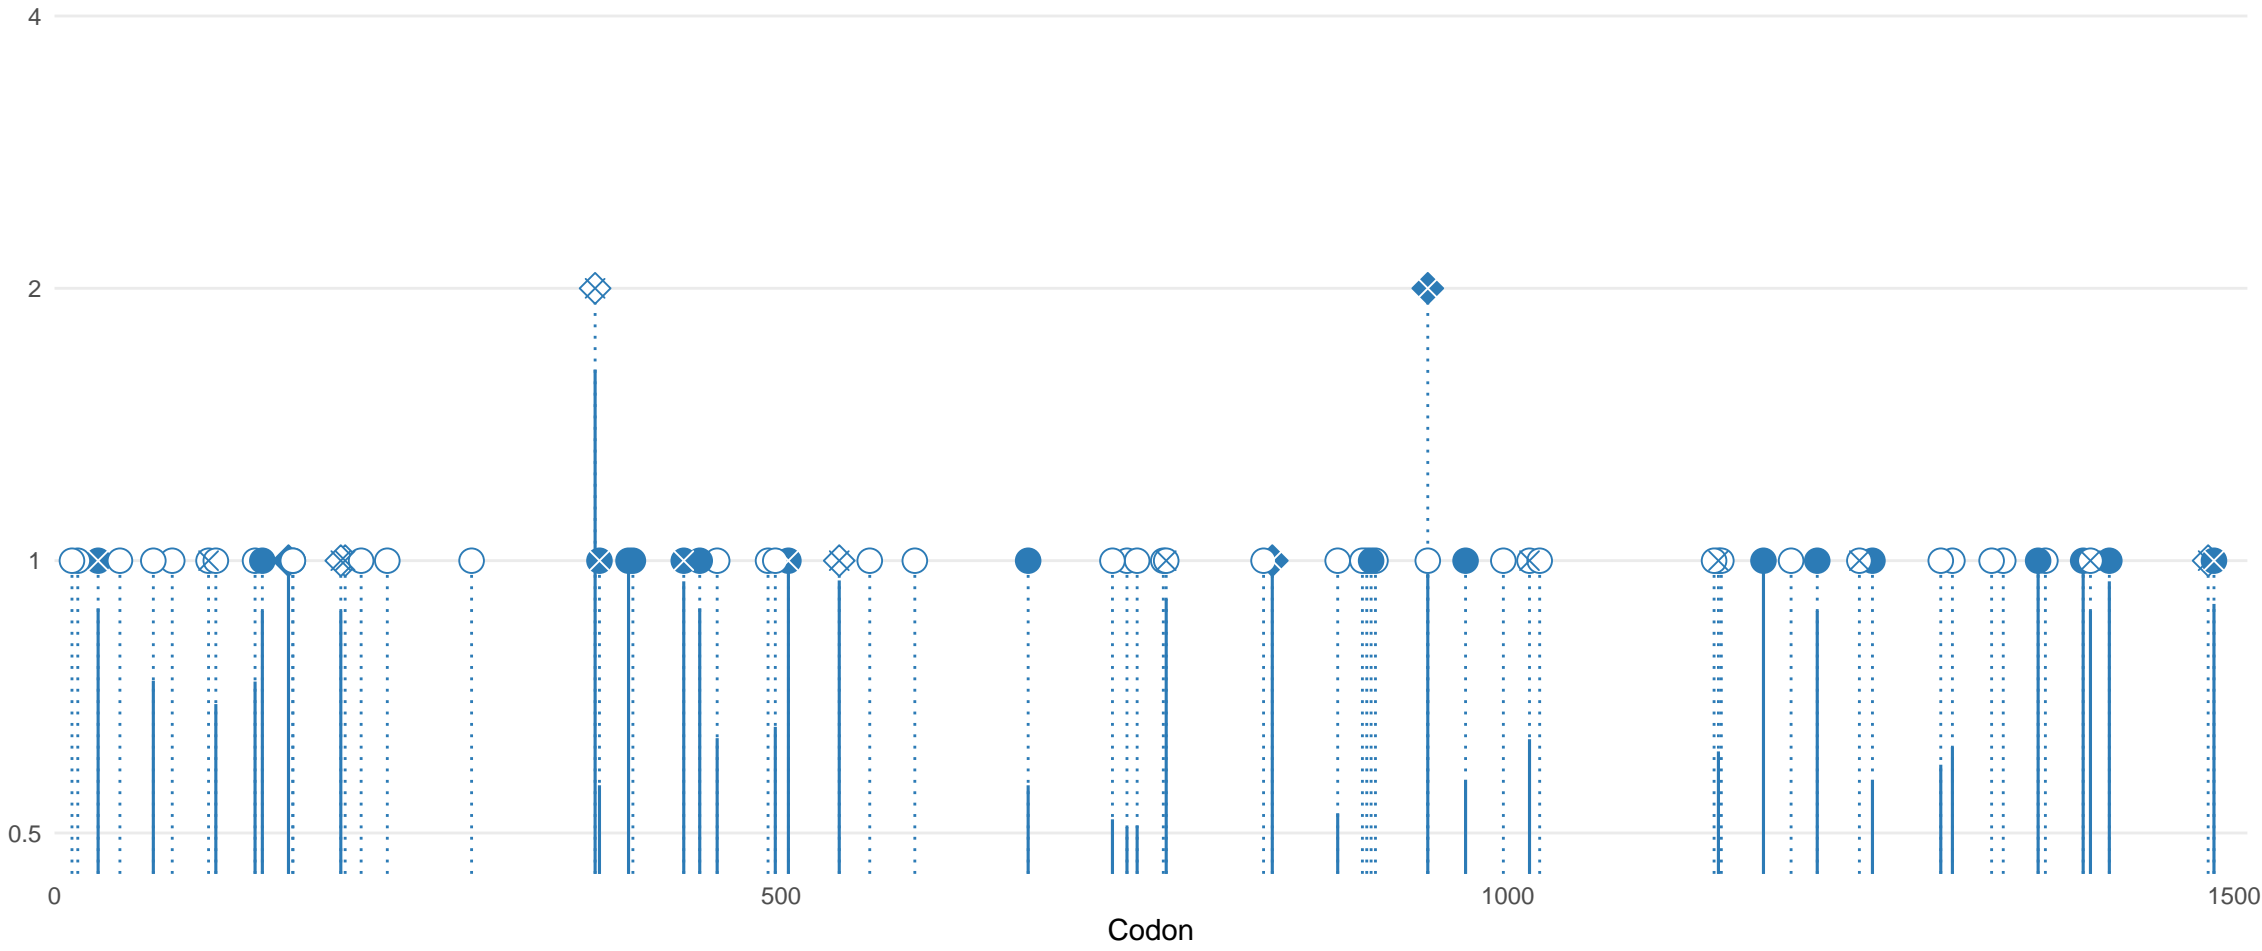

**Monoallelic:** ○ SNV □ MNV ◇ INDEL in frame ⊗ SNV nonsense ⊠ MNV nonsense ⊡ INDEL out of frame  
**Biallelic/Multihit:** ● SNV ■ MNV ◆ INDEL in frame ⊗ SNV nonsense ⊠ MNV nonsense ⊡ INDEL out of frame  
**Hotspot:** ●

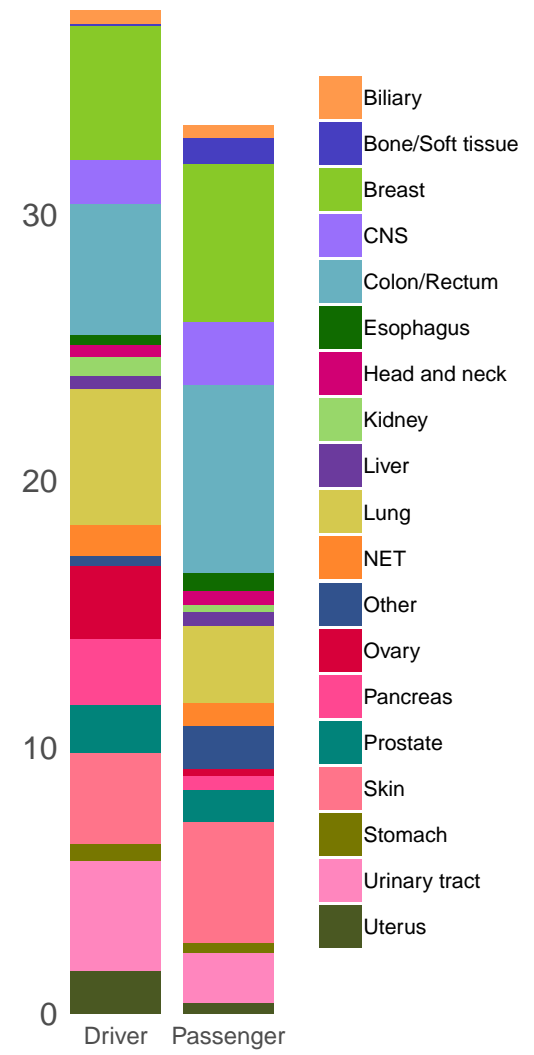

Driver Passenger

# ARID1A Variants

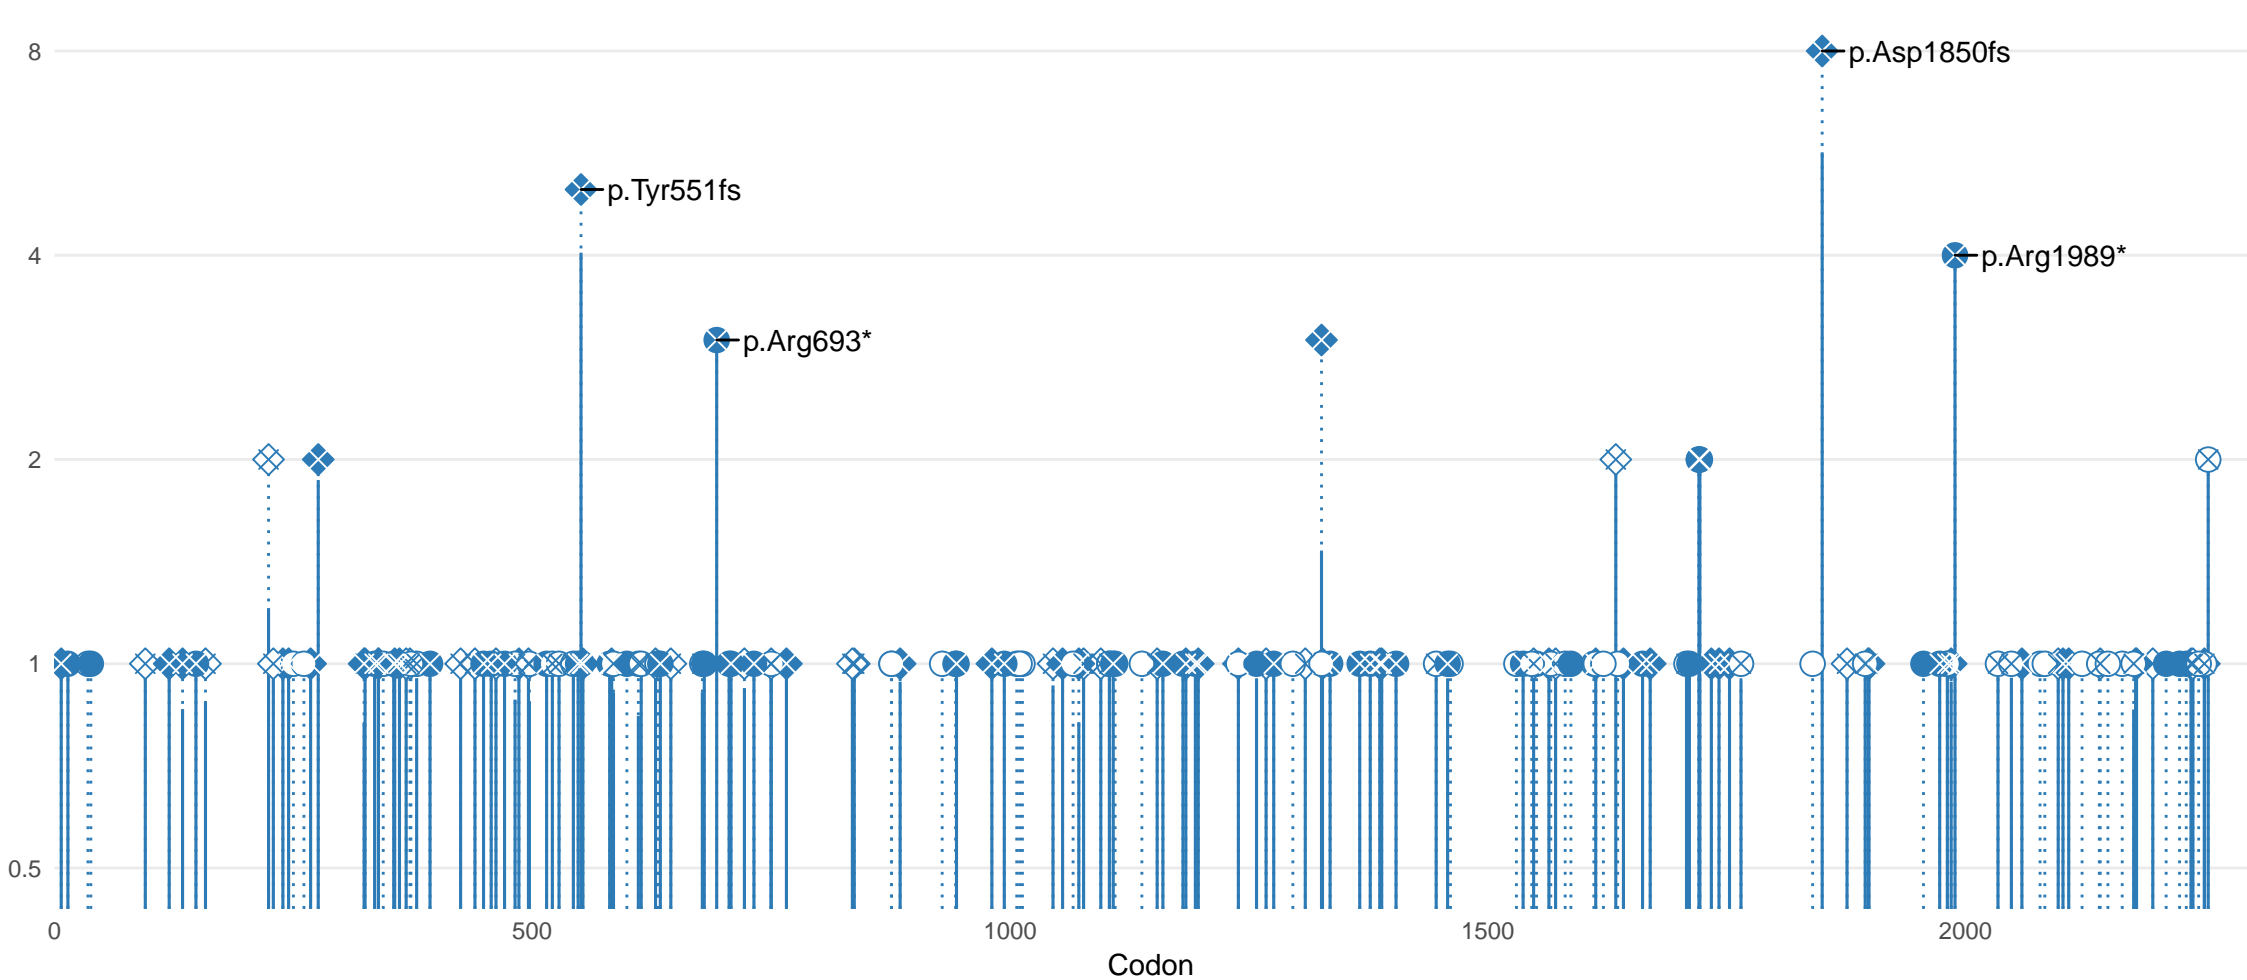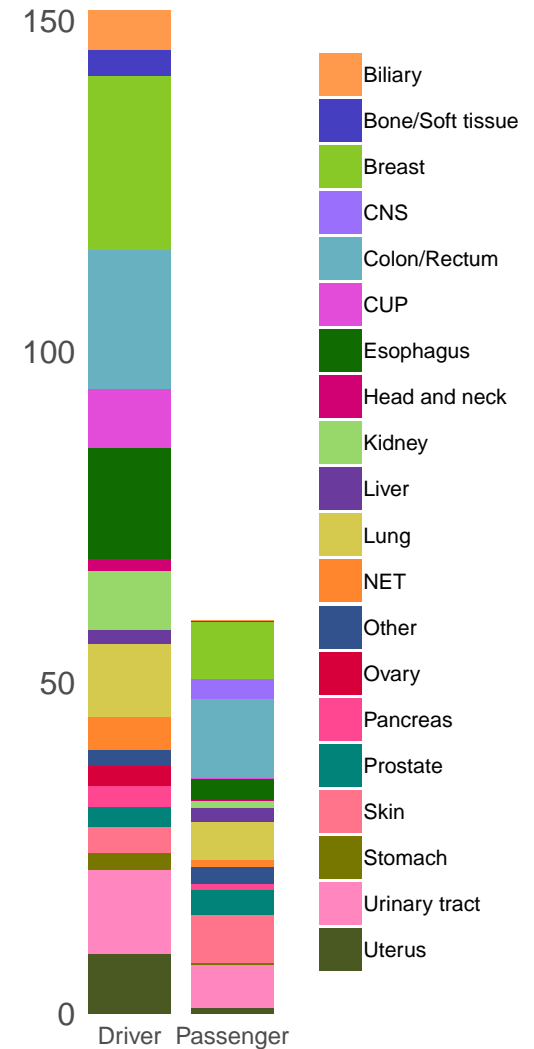

# ARID1B Variants

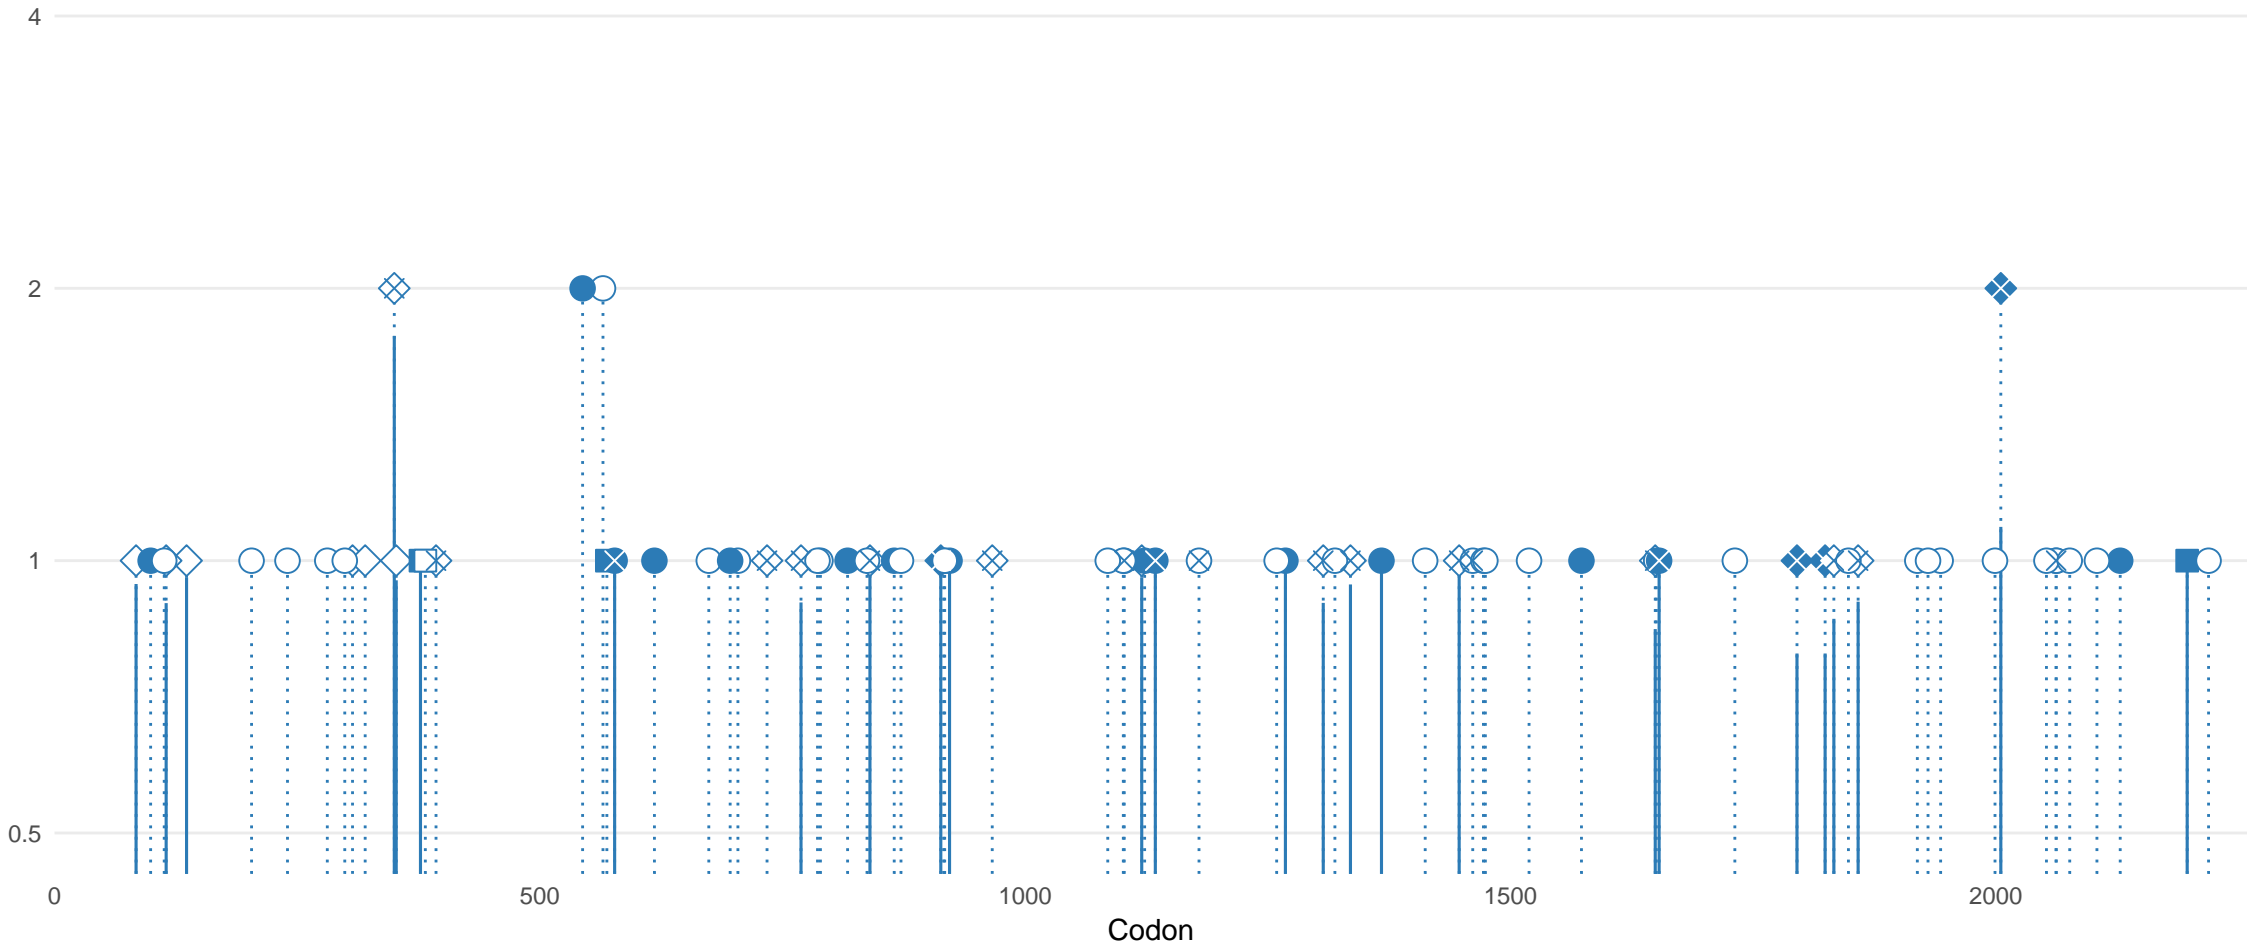

**Monoallelic:** ○ SNV □ MNV ◇ INDEL in frame ⊗ SNV nonsense ⊗ MNV nonsense ⊗ INDEL out of frame  
**Biallelic/Multihit:** ● SNV ■ MNV ◆ INDEL in frame ⊗ SNV nonsense ⊗ MNV nonsense ◆ INDEL out of frame  
**Hotspot:** ●

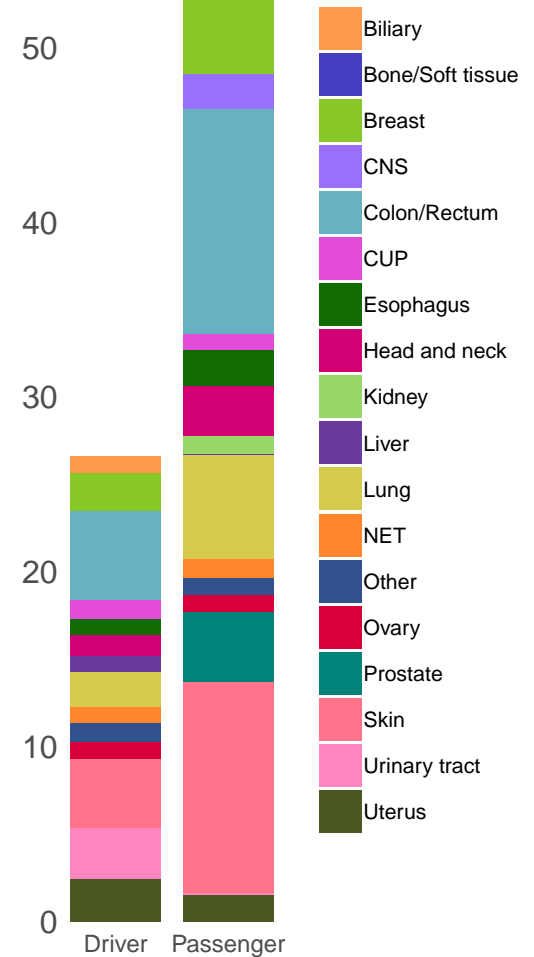

Driver Passenger



# ARID2 Variants

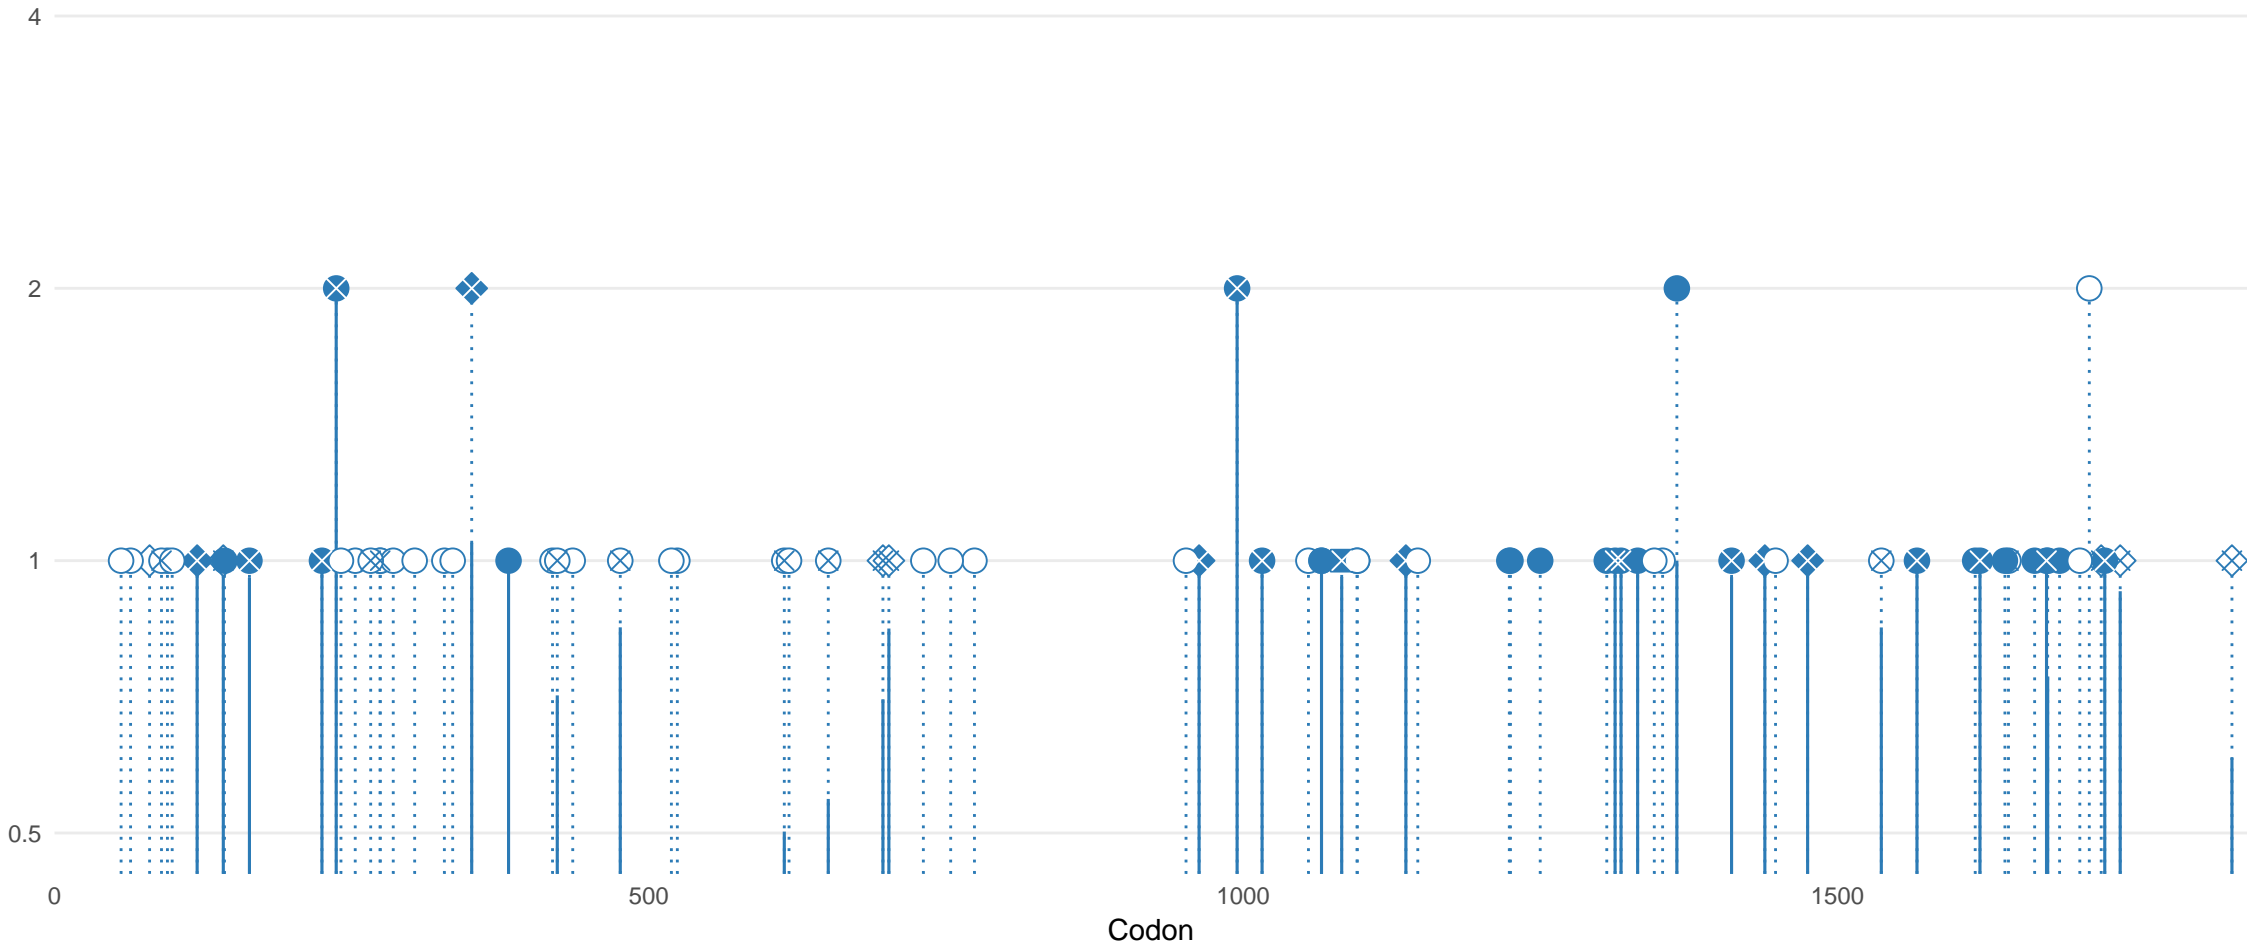

**Monoallelic:** ○ SNV □ MNV ◇ INDEL in frame ⊗ SNV nonsense ⊗ MNV nonsense ⊗ INDEL out of frame  
**Biallelic/Multi-hit:** ● SNV ■ MNV ◆ INDEL in frame ⊗ SNV nonsense ⊗ MNV nonsense ◆ INDEL out of frame  
**Hotspot:** ●

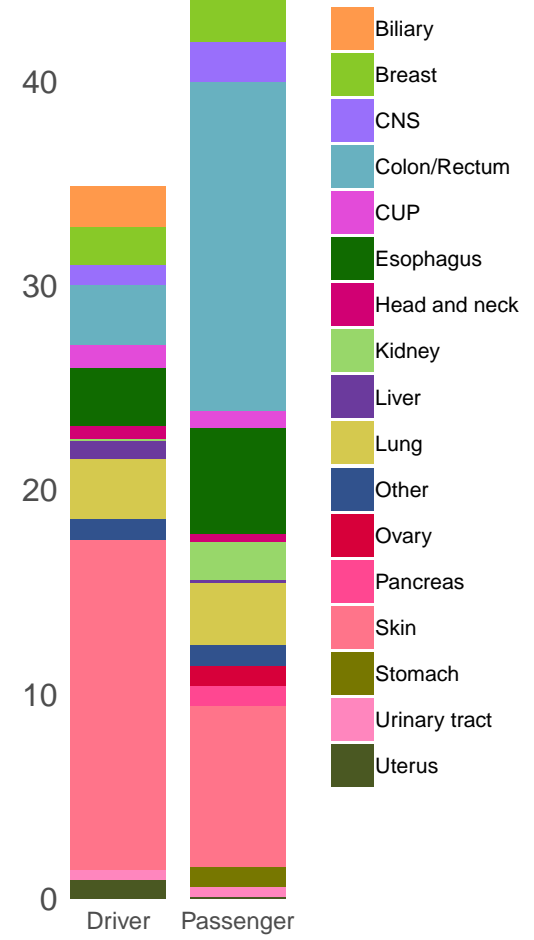

# ASXL1 Variants

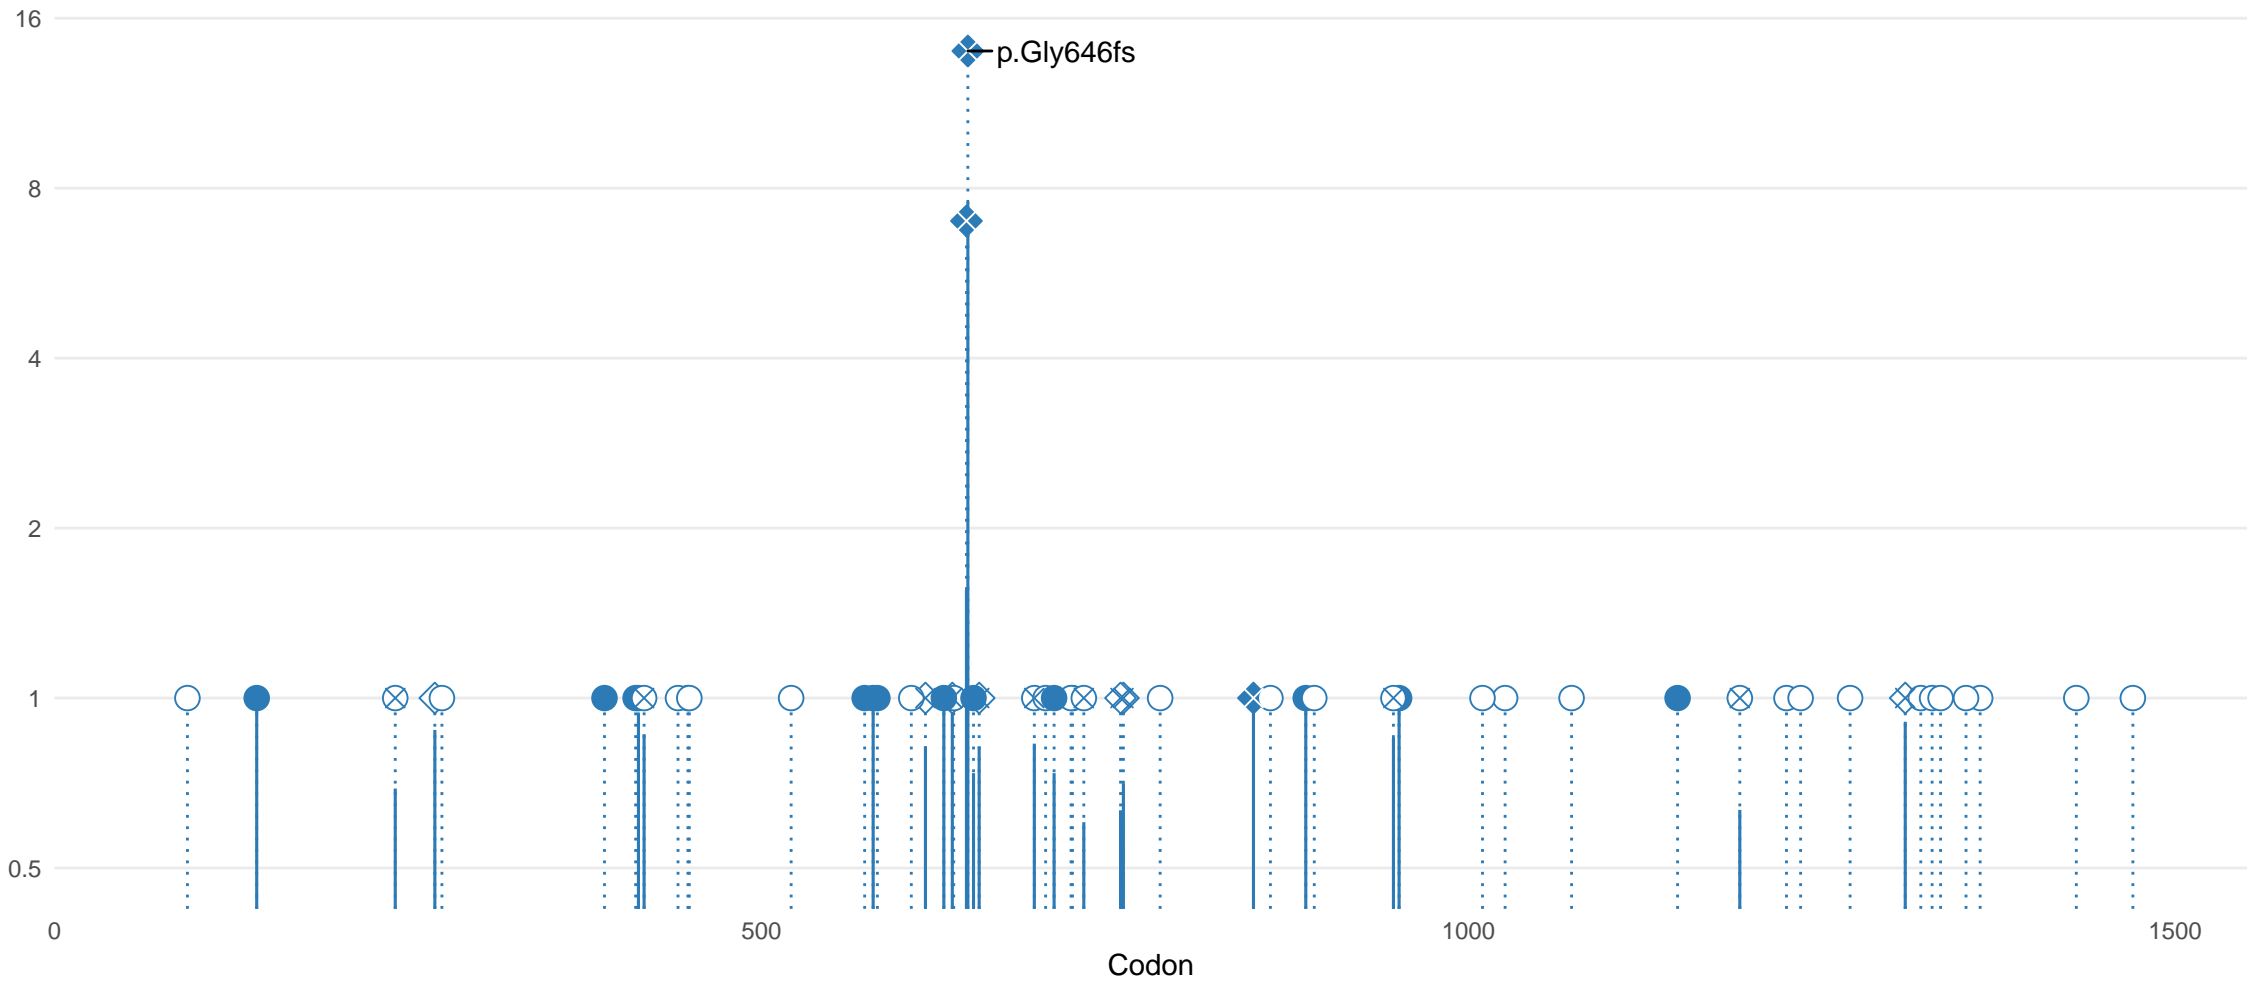

**Monoallelic:** ○ SNV □ MNV ◇ INDEL in frame ⊗ SNV nonsense ⊗ MNV nonsense ⊗ INDEL out of frame  
**Biallelic/Multihit:** ● SNV ■ MNV ◆ INDEL in frame ⊗ SNV nonsense ⊗ MNV nonsense ◆ INDEL out of frame  
**Hotspot:** ●

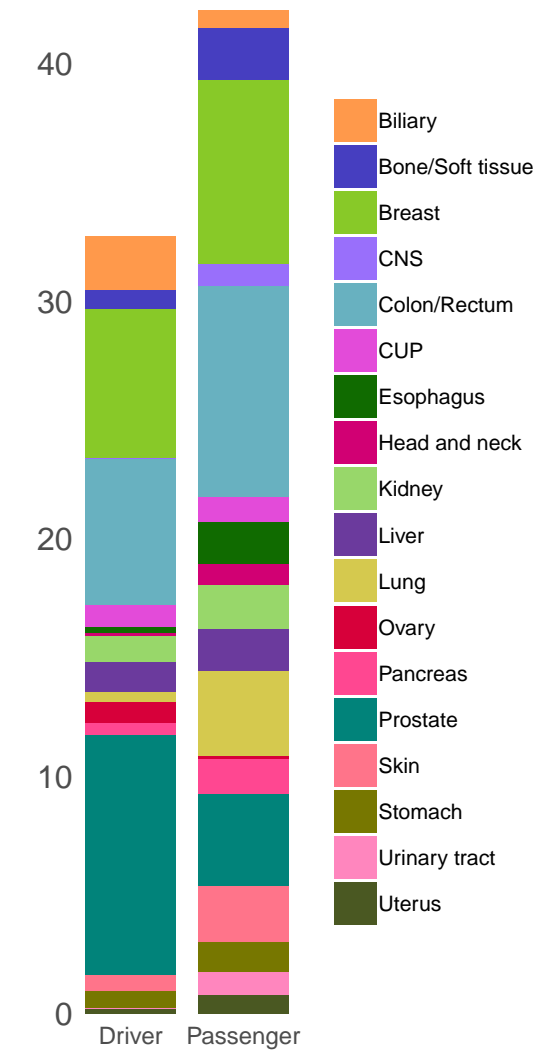

# ATM Variants

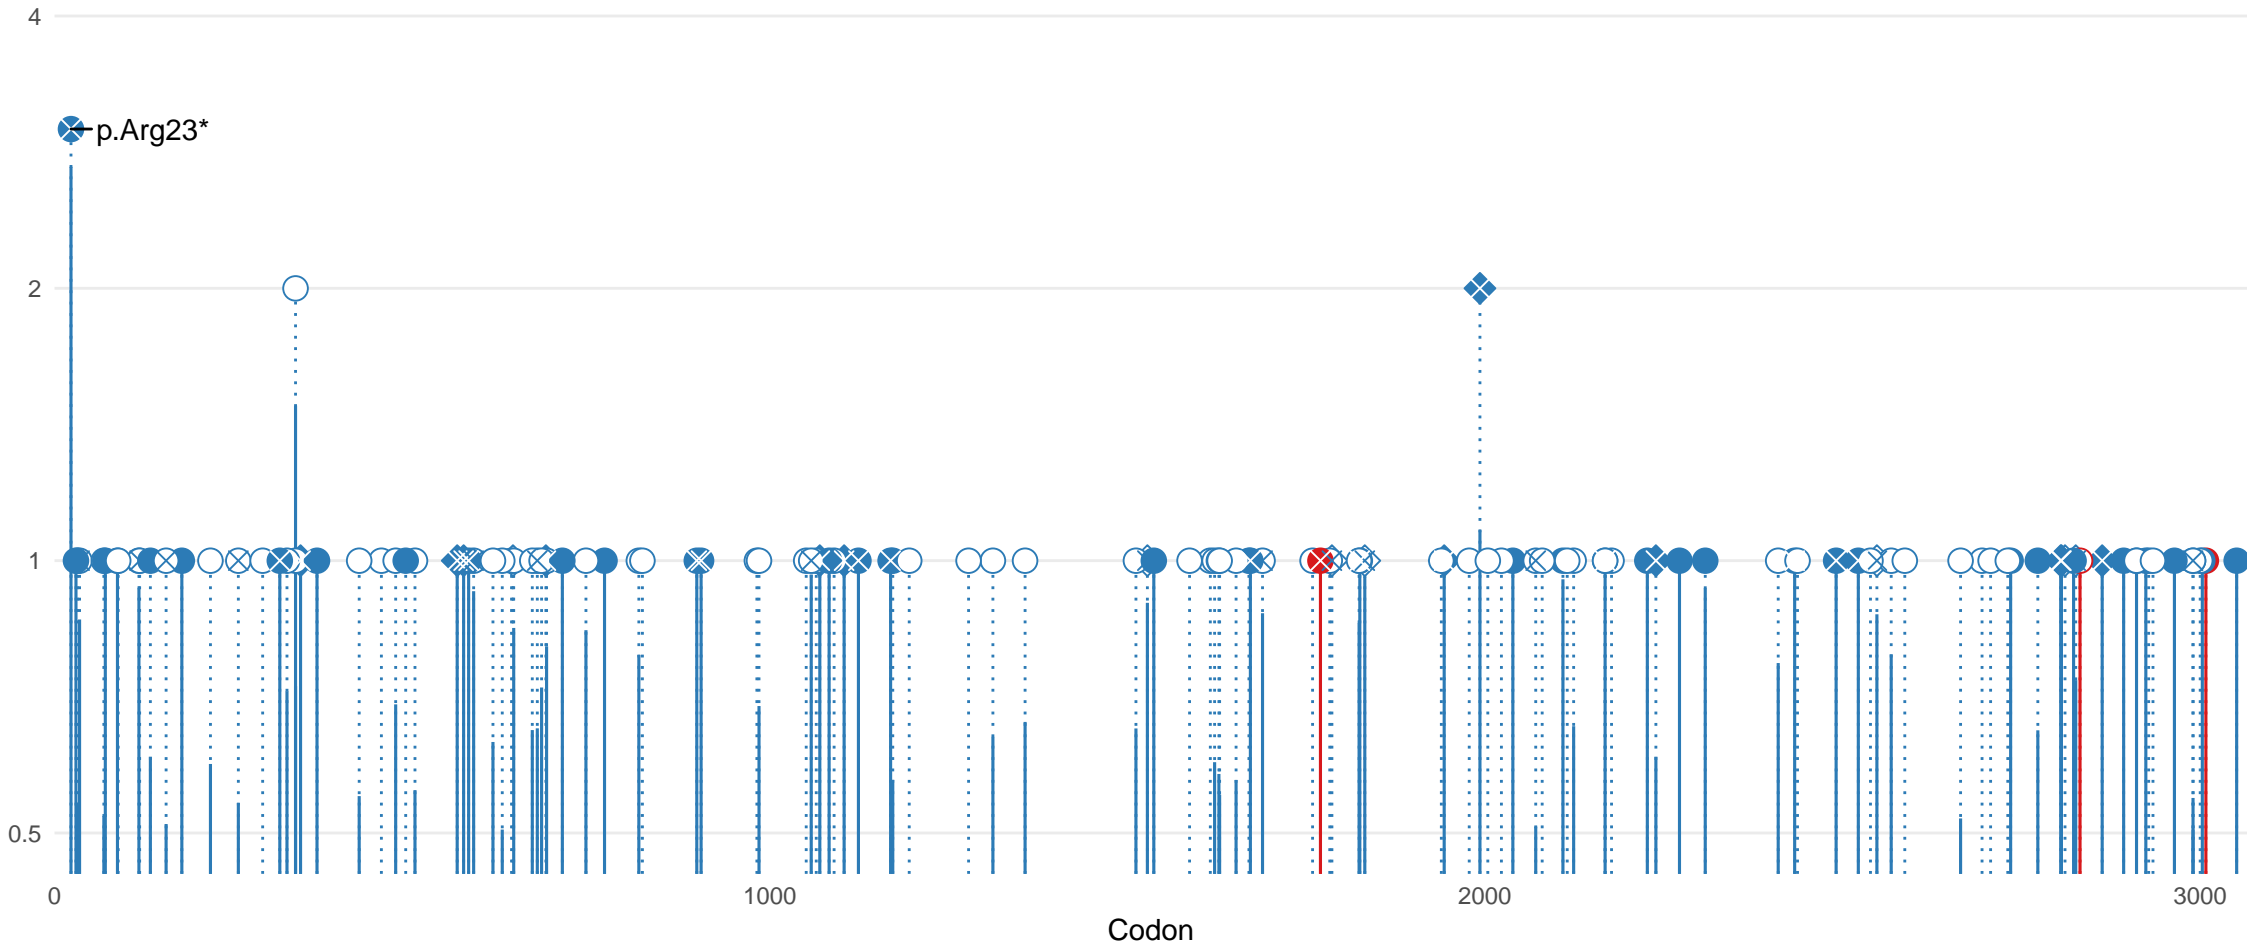

**Monoallelic:** ○ SNV □ MNV ◇ INDEL in frame ⊗ SNV nonsense ⊗ MNV nonsense ⊗ INDEL out of frame  
**Biallelic/Multihit:** ● SNV ■ MNV ◆ INDEL in frame ⊗ SNV nonsense ⊗ MNV nonsense ◆ INDEL out of frame  
**Hotspot:** ●

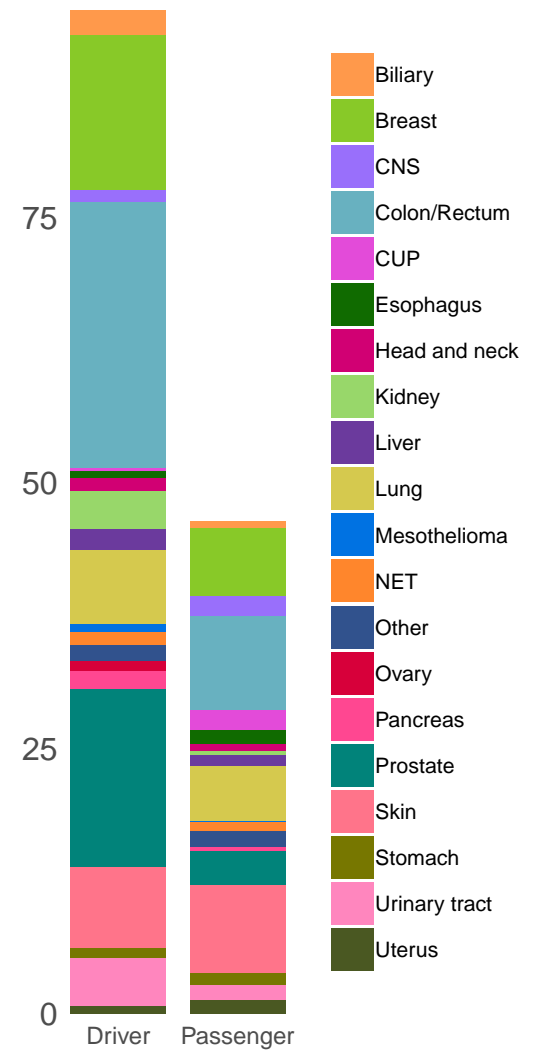

Driver Passenger

# ATP1A1 Variants

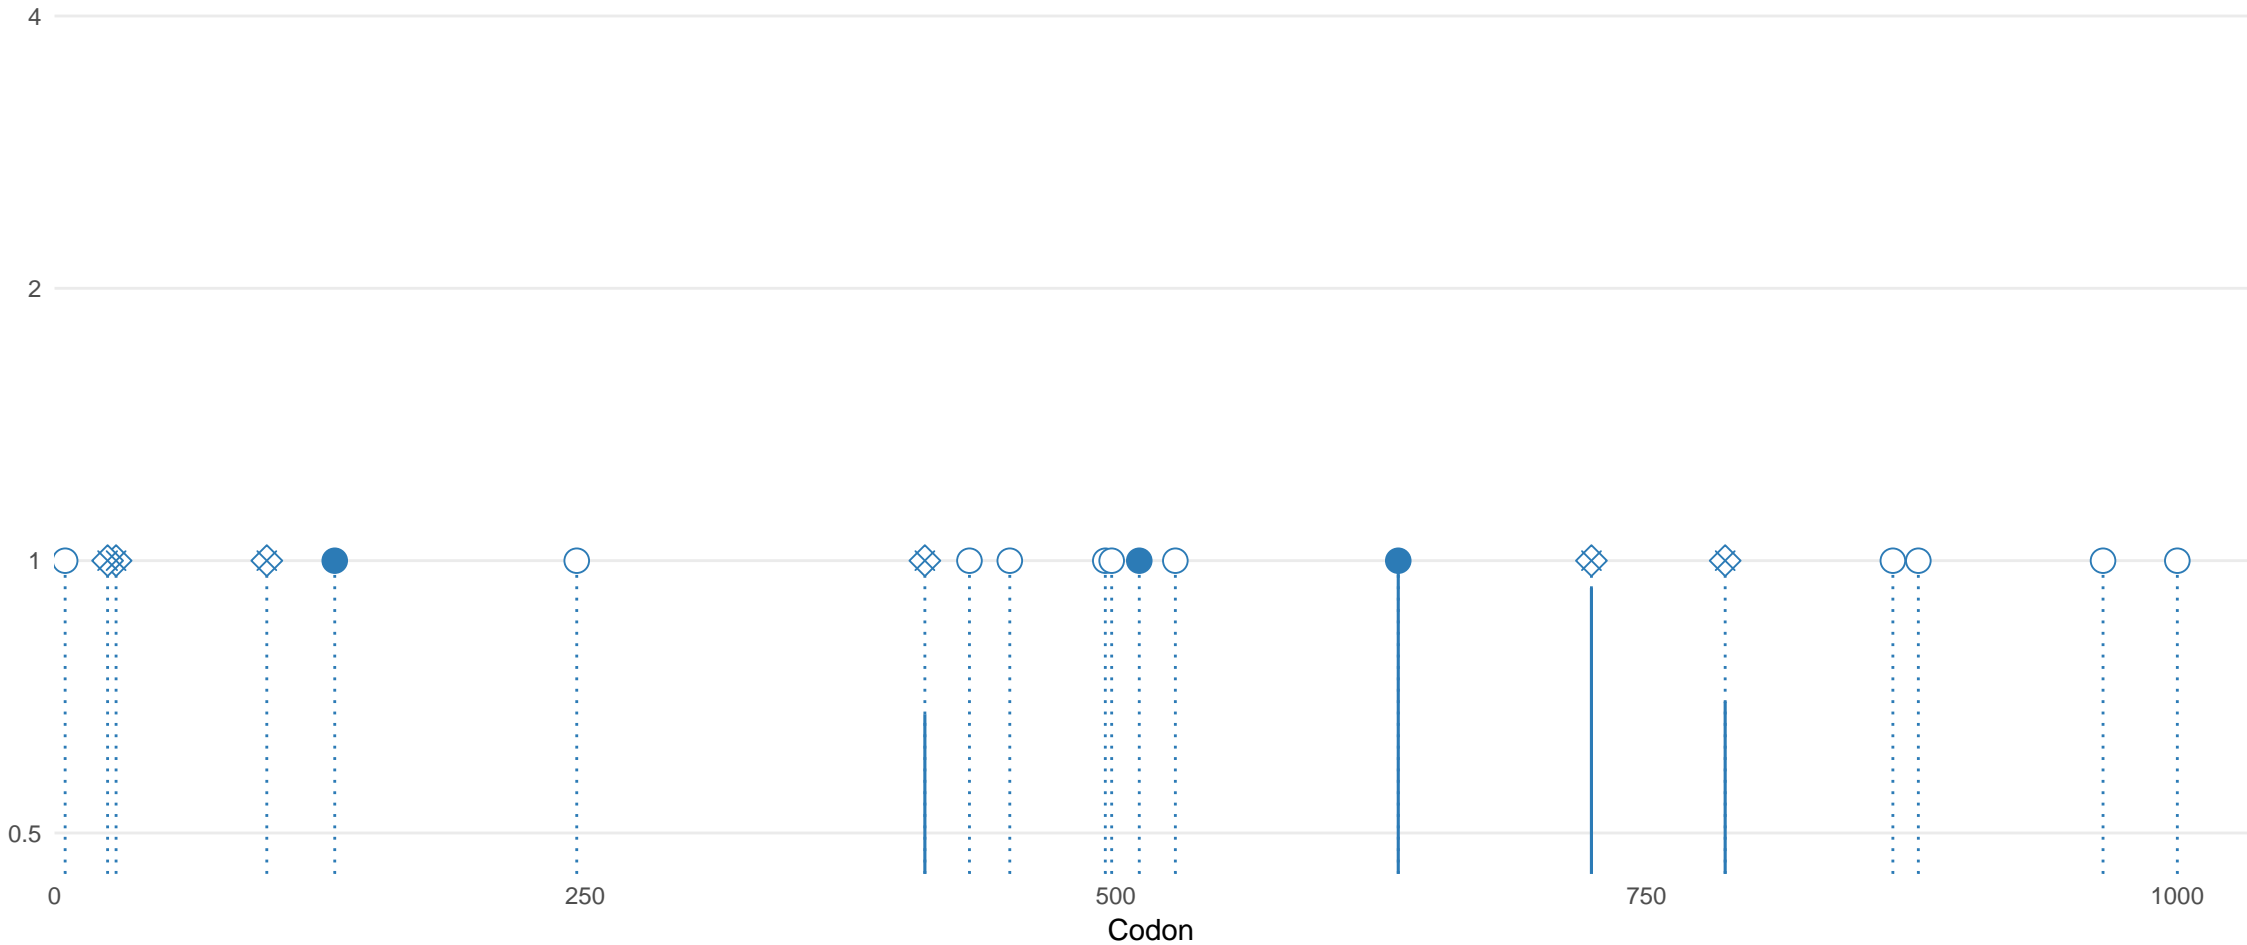

**Monoallelic:** ○ SNV □ MNV ◇ INDEL in frame ⊗ SNV nonsense ⊗ MNV nonsense ⊗ INDEL out of frame  
**Biallelic/Multihit:** ● SNV ■ MNV ◆ INDEL in frame ⊗ SNV nonsense ⊗ MNV nonsense ◆ INDEL out of frame  
**Hotspot:** ●

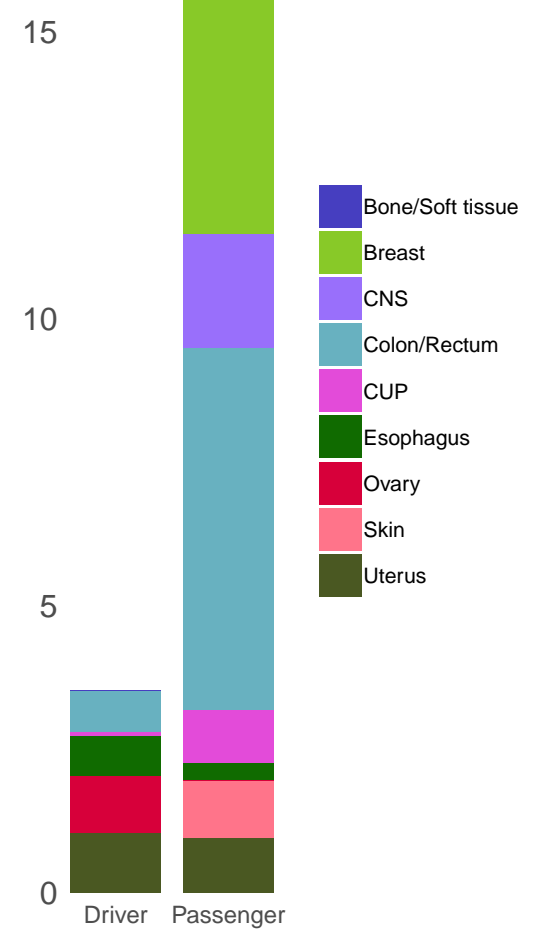

# ATP2B3 Variants

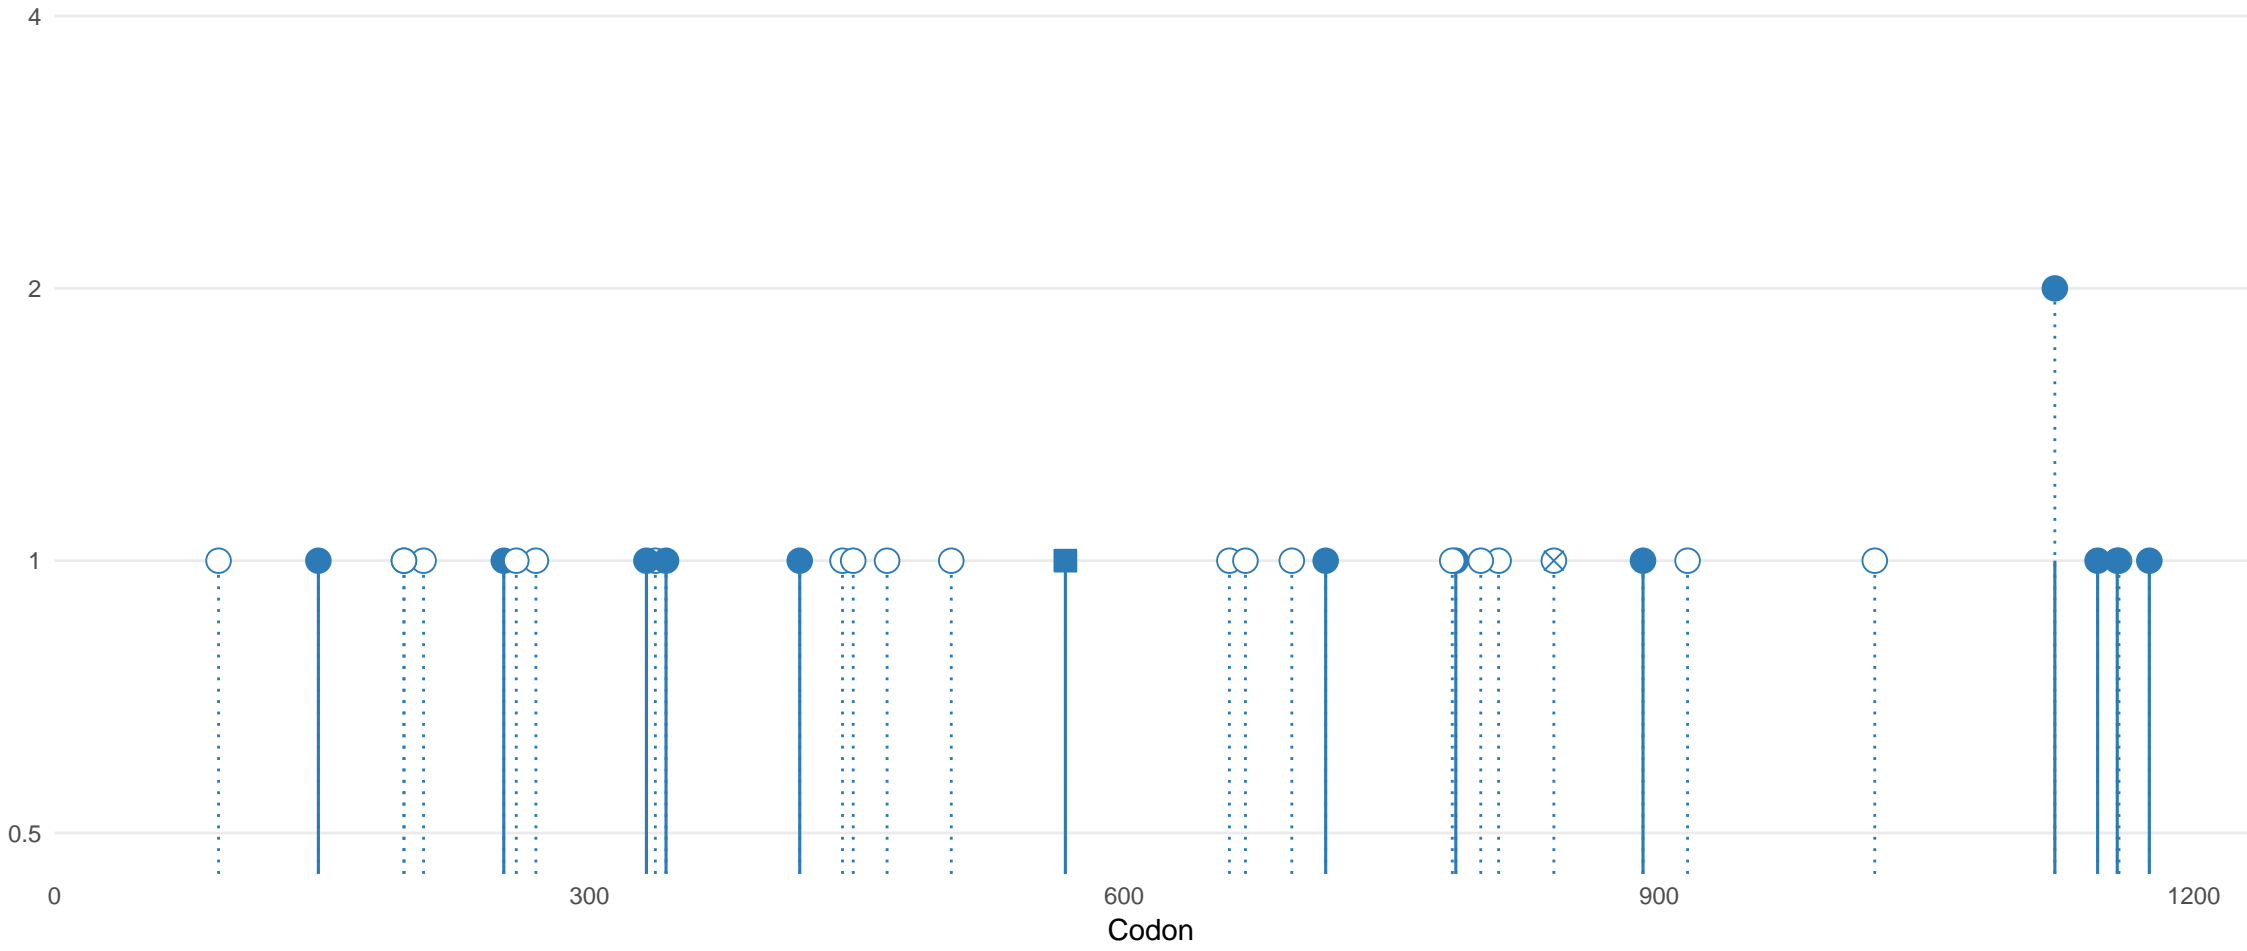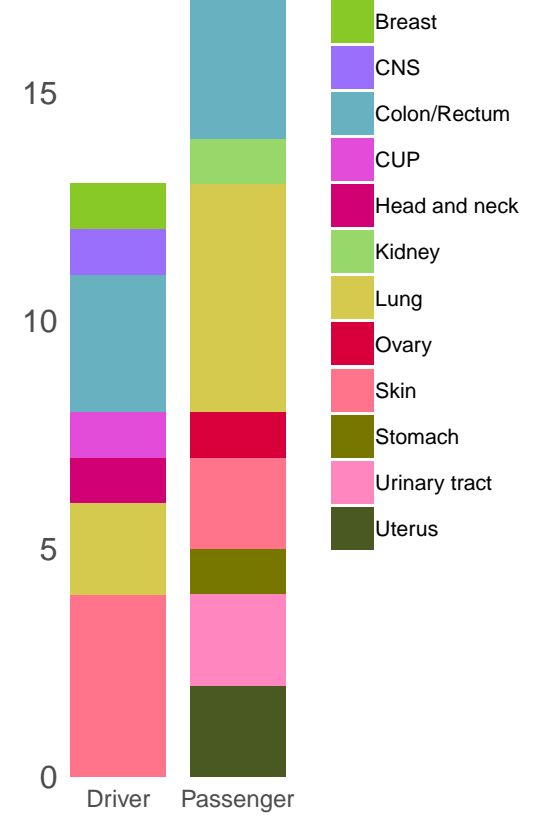

**Monoallelic:** ○ SNV □ MNV ◇ INDEL in frame ⊗ SNV nonsense ⊗ MNV nonsense ⊗ INDEL out of frame  
**Biallelic/Multihit:** ● SNV ■ MNV ◆ INDEL in frame ⊗ SNV nonsense ⊗ MNV nonsense ◆ INDEL out of frame  
**Hotspot:** ●

# ATR Variants

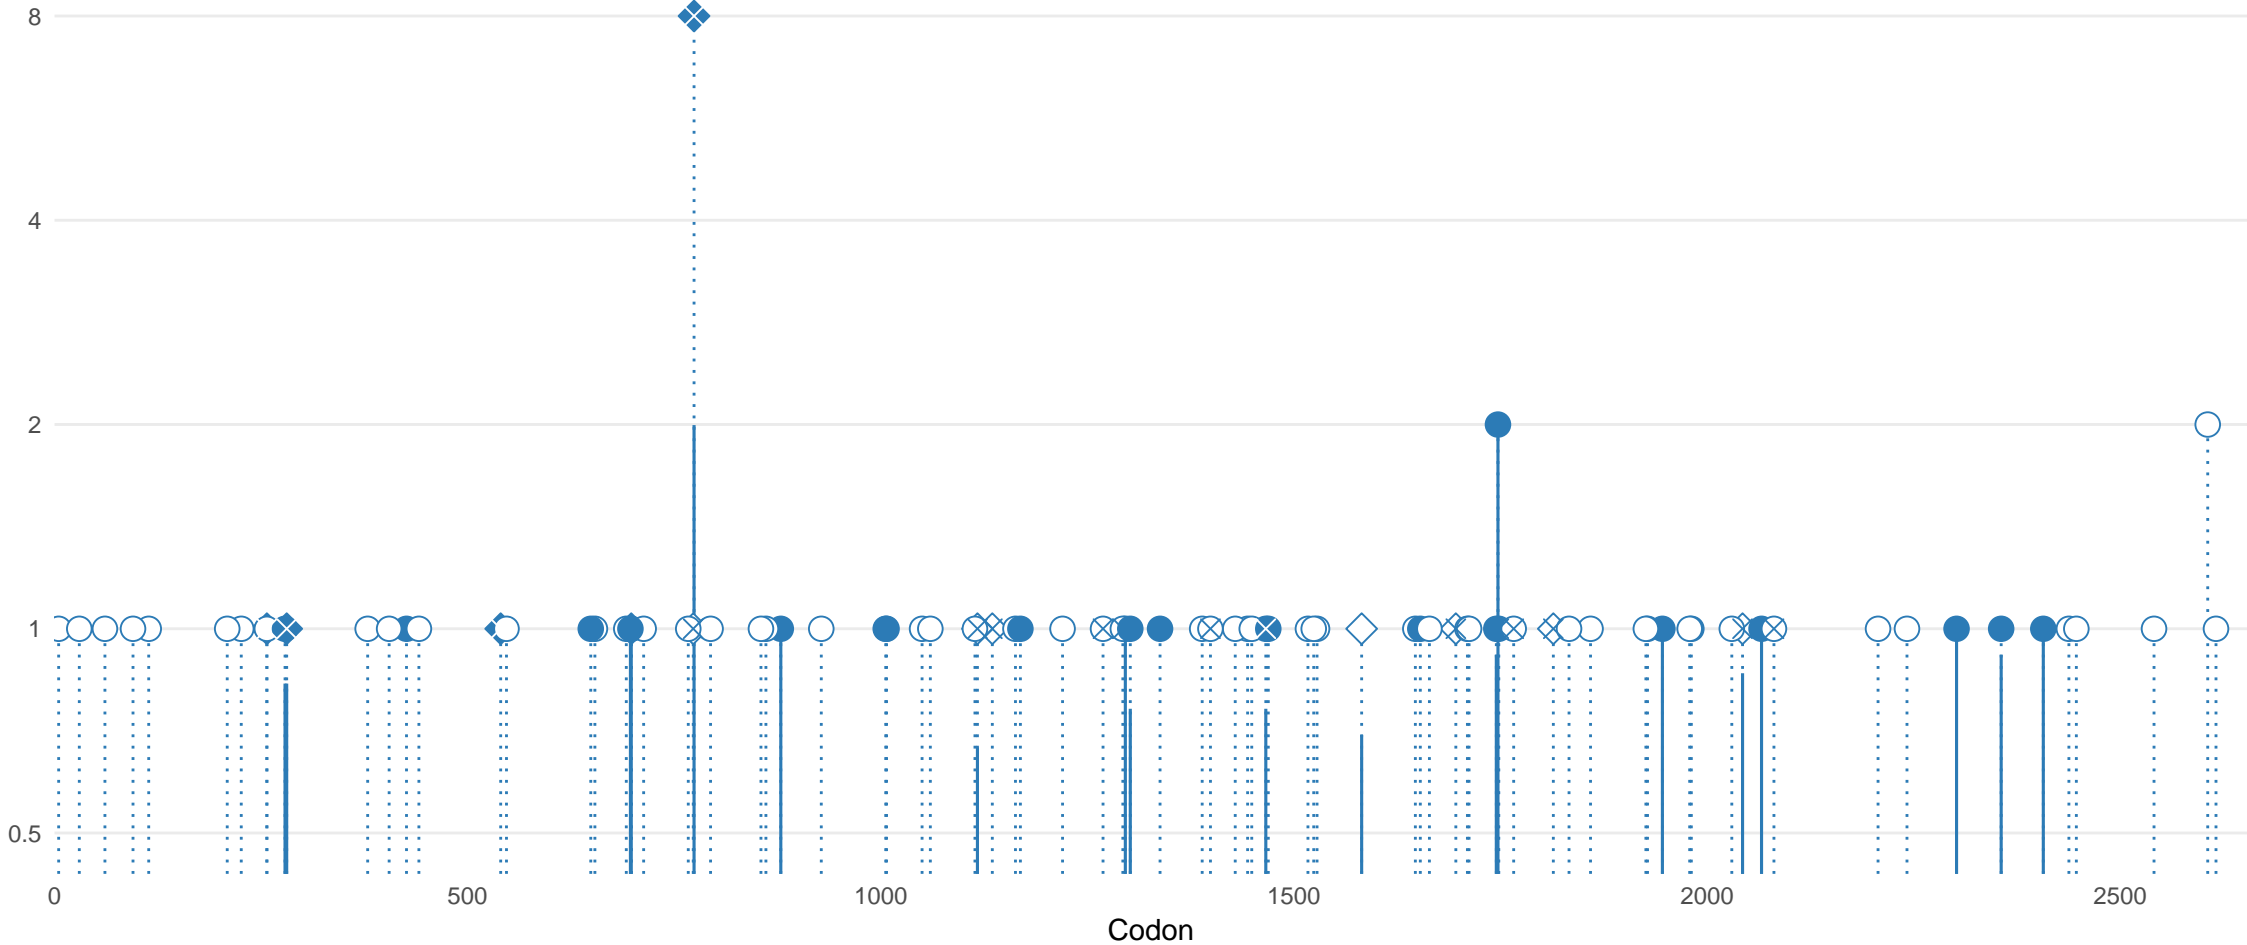

Monoallelic: ○ SNV □ MNV ◇ INDEL in frame ⊗ SNV nonsense ⊗ MNV nonsense ⊗ INDEL out of frame  
 Biallelic/Multihit: ● SNV ■ MNV ◆ INDEL in frame ⊗ SNV nonsense ⊗ MNV nonsense ◆ INDEL out of frame  
 Hotspot: ●

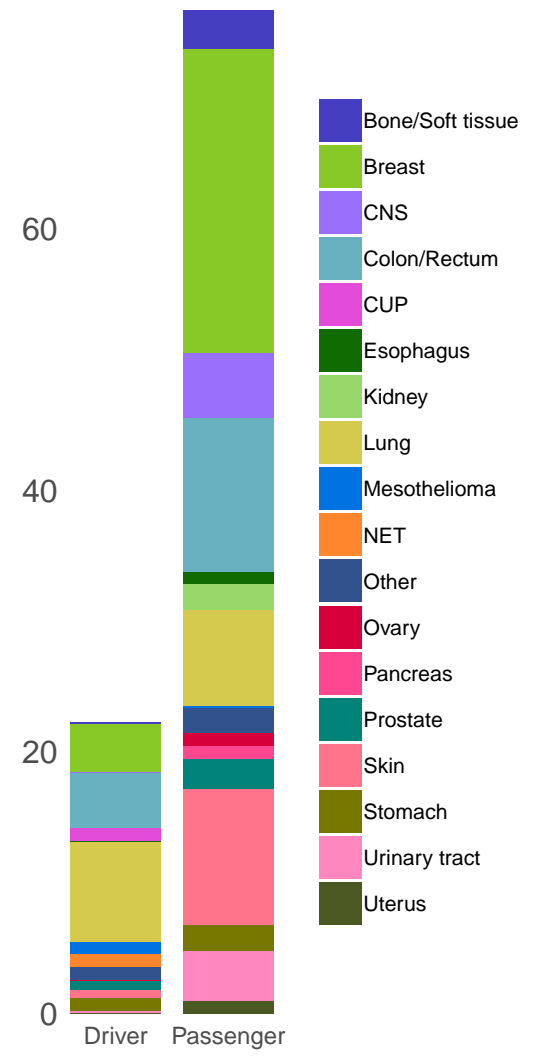

# ATRX Variants

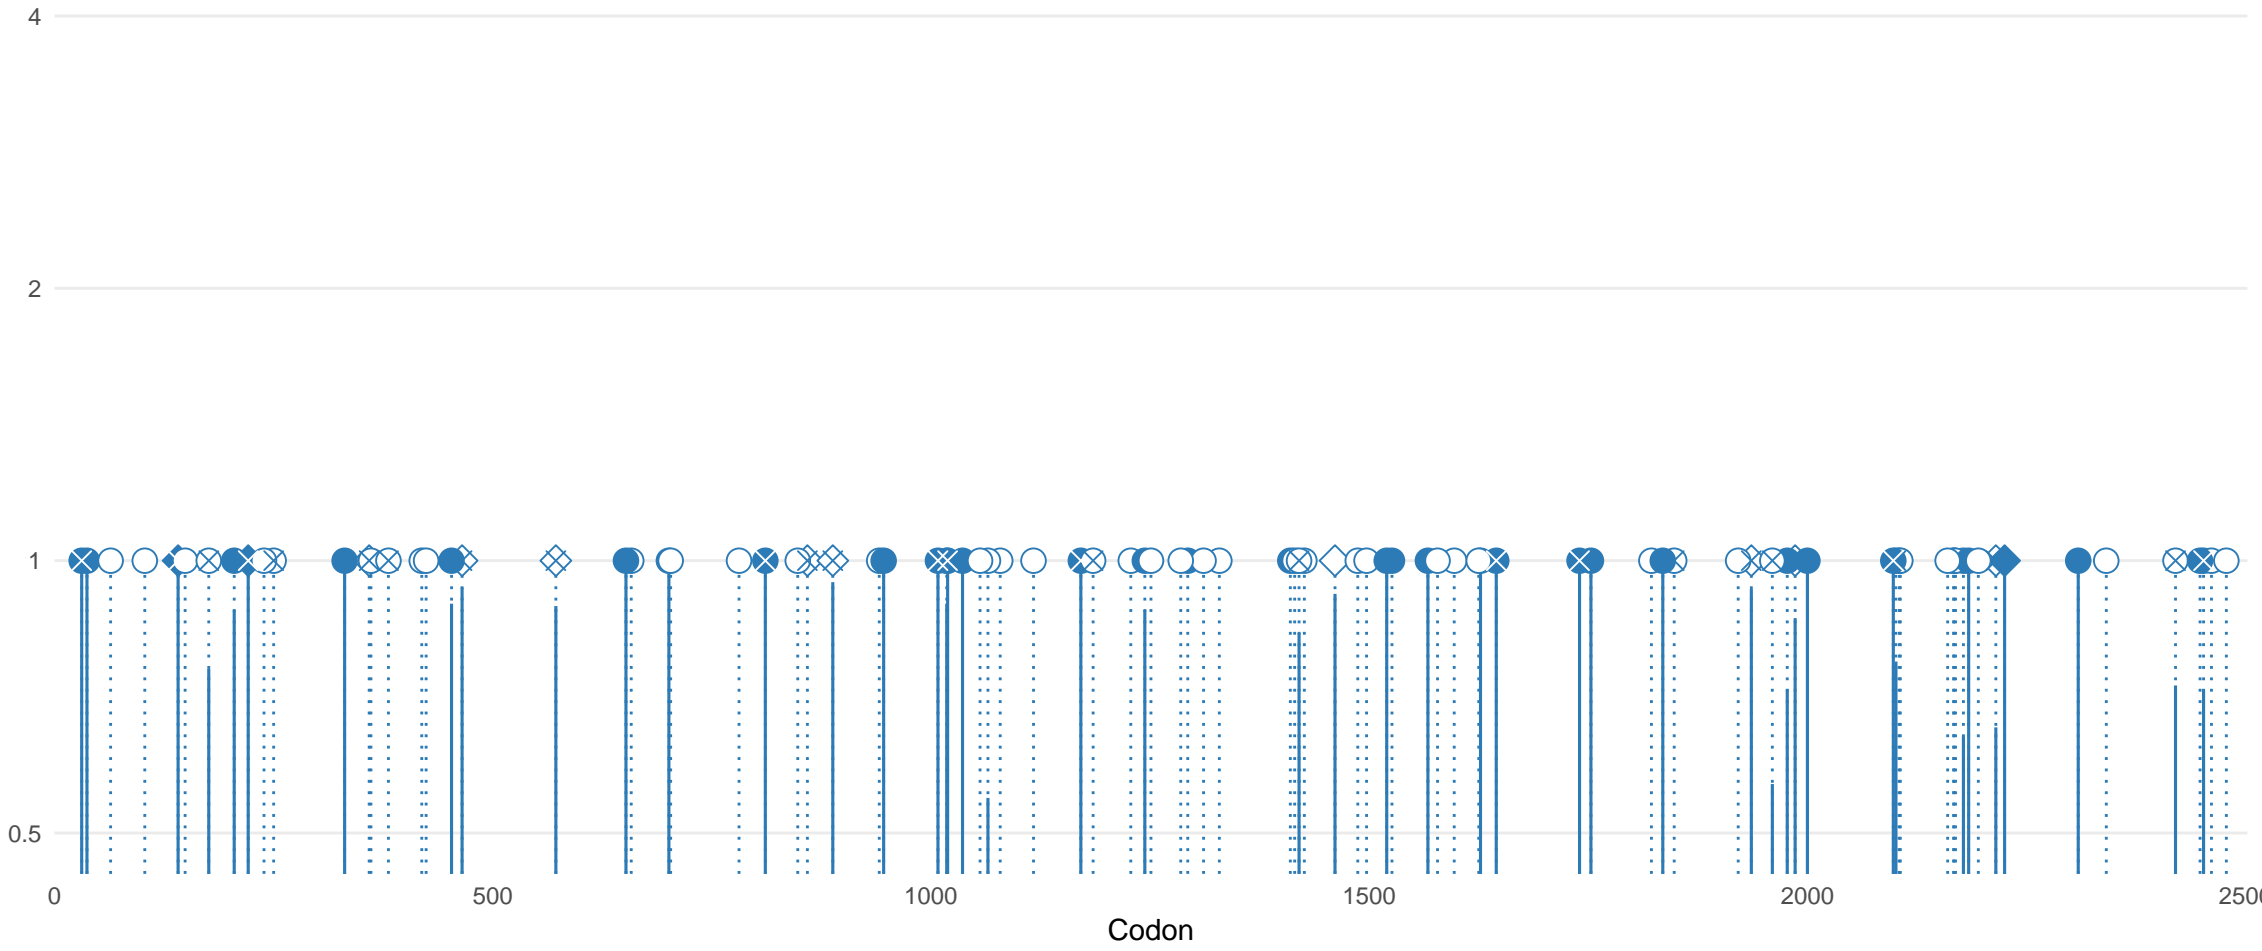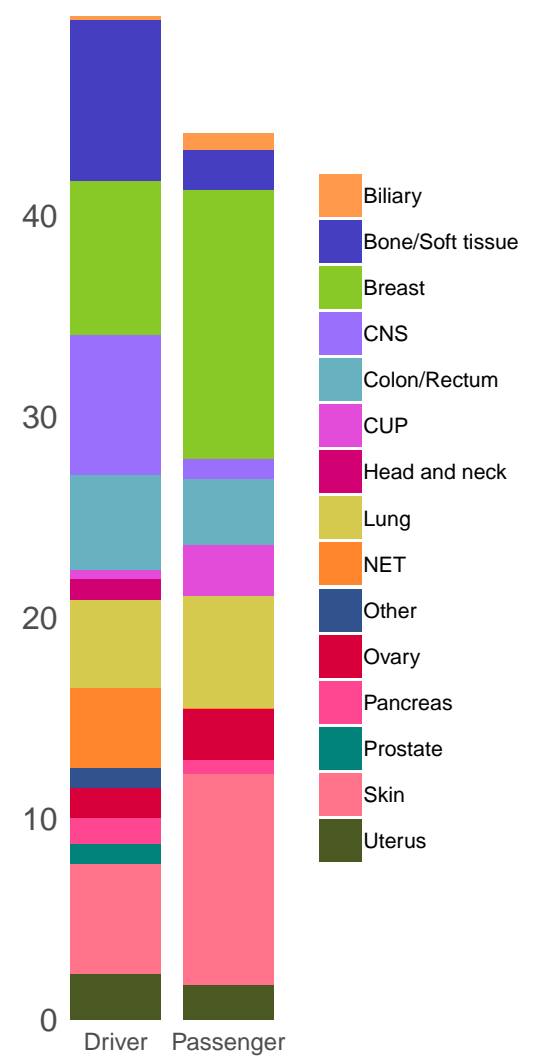

**Monoallelic:** ○ SNV □ MNV ◇ INDEL in frame ⊗ SNV nonsense ⊗ MNV nonsense ⊗ INDEL out of frame  
**Biallelic/Multihit:** ● SNV ■ MNV ◆ INDEL in frame ⊗ SNV nonsense ⊗ MNV nonsense ◆ INDEL out of frame  
**Hotspot:** ●

# AXIN1 Variants

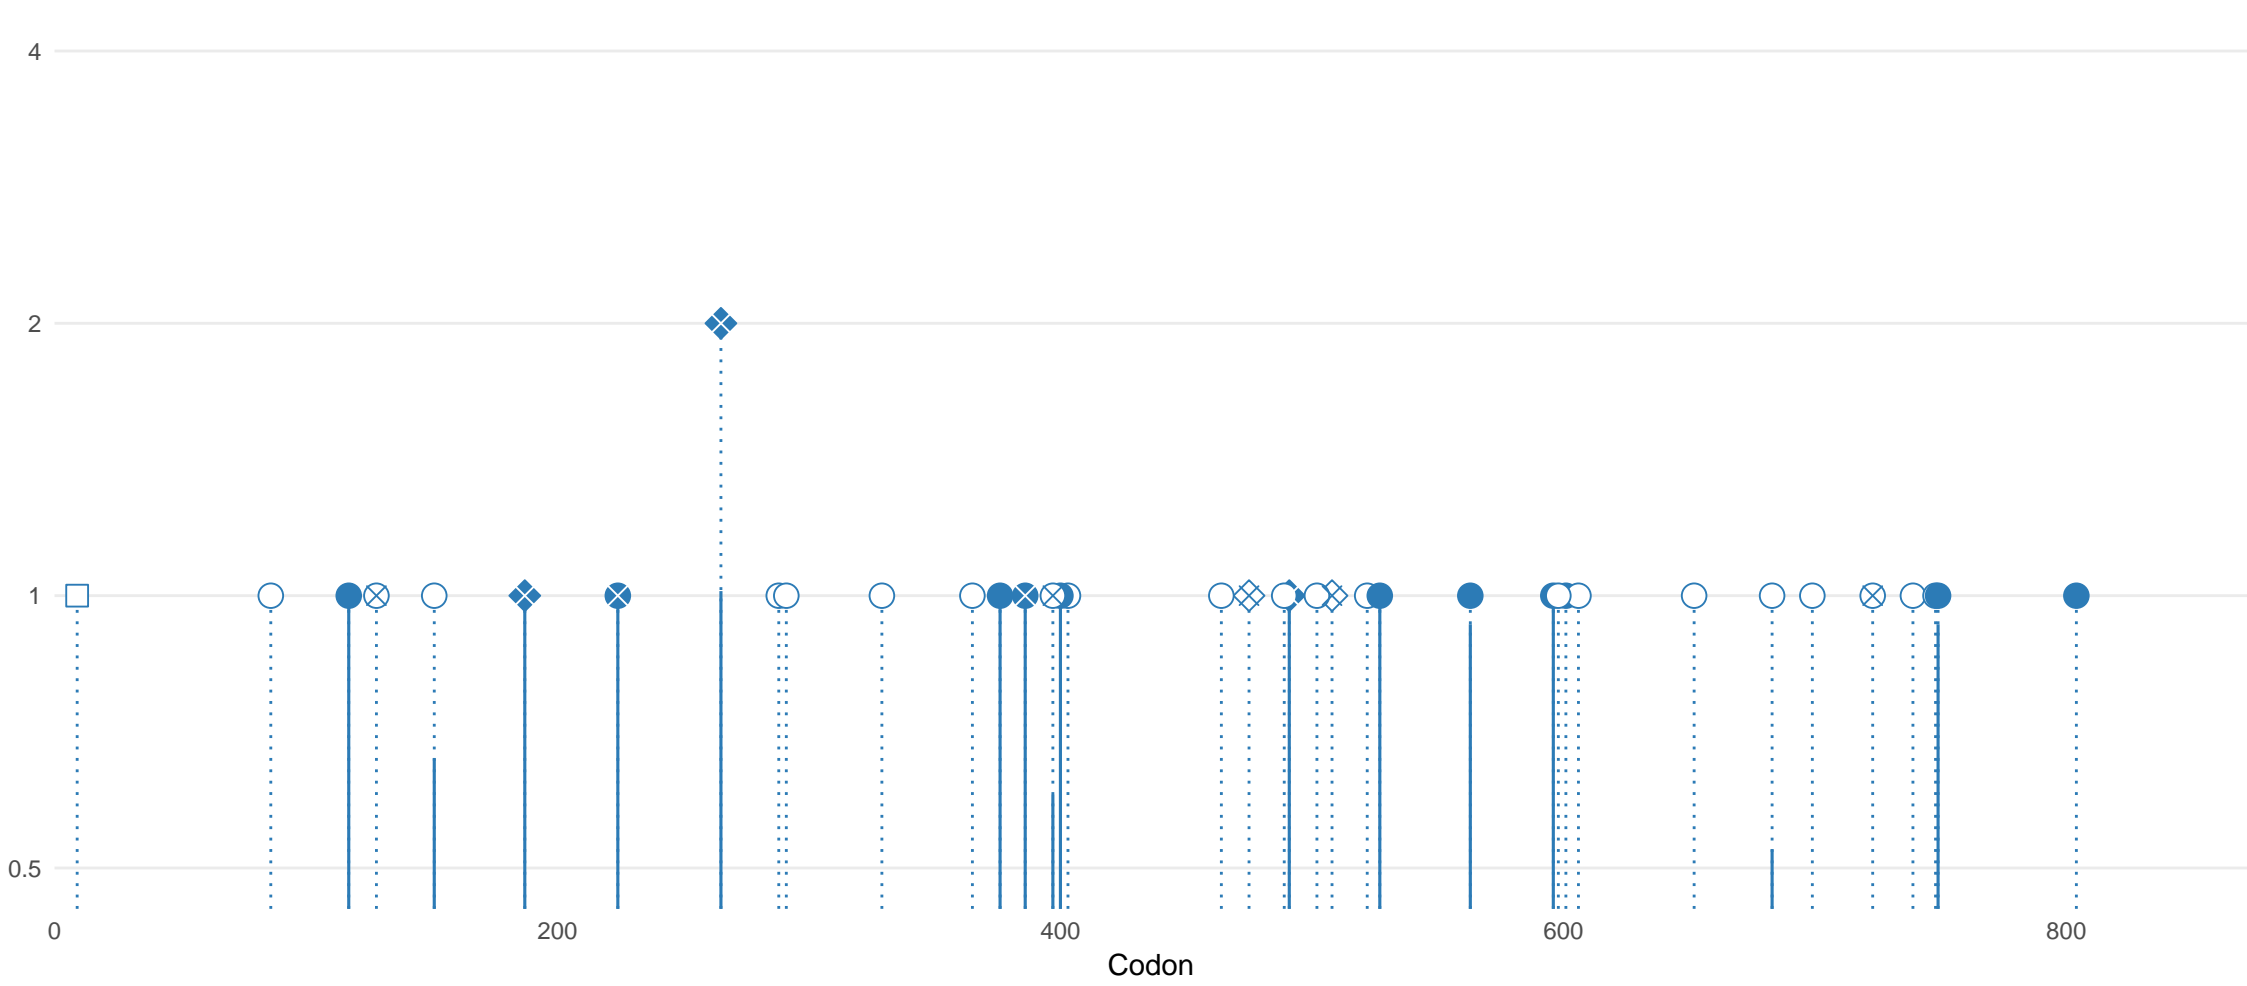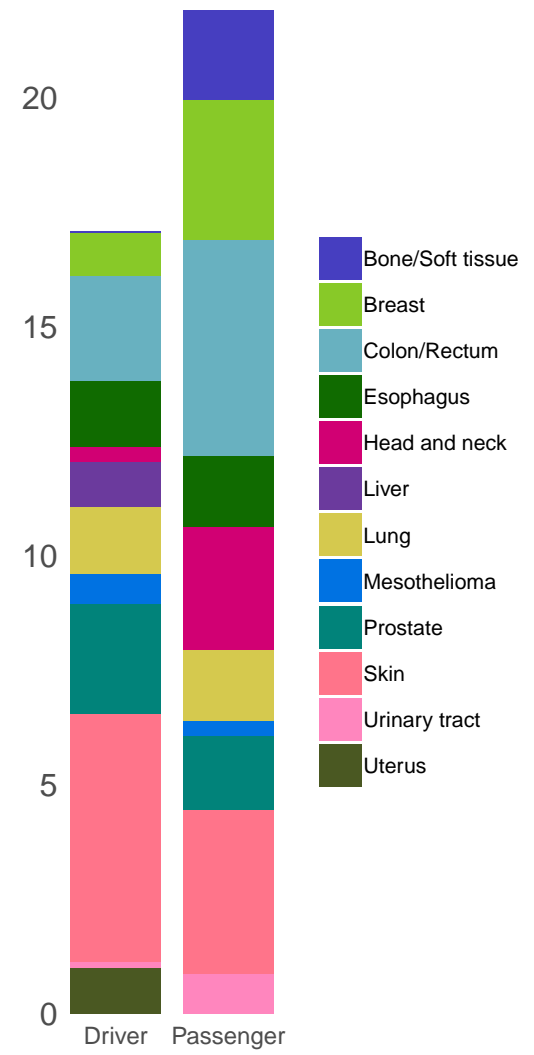



# AXIN2 Variants

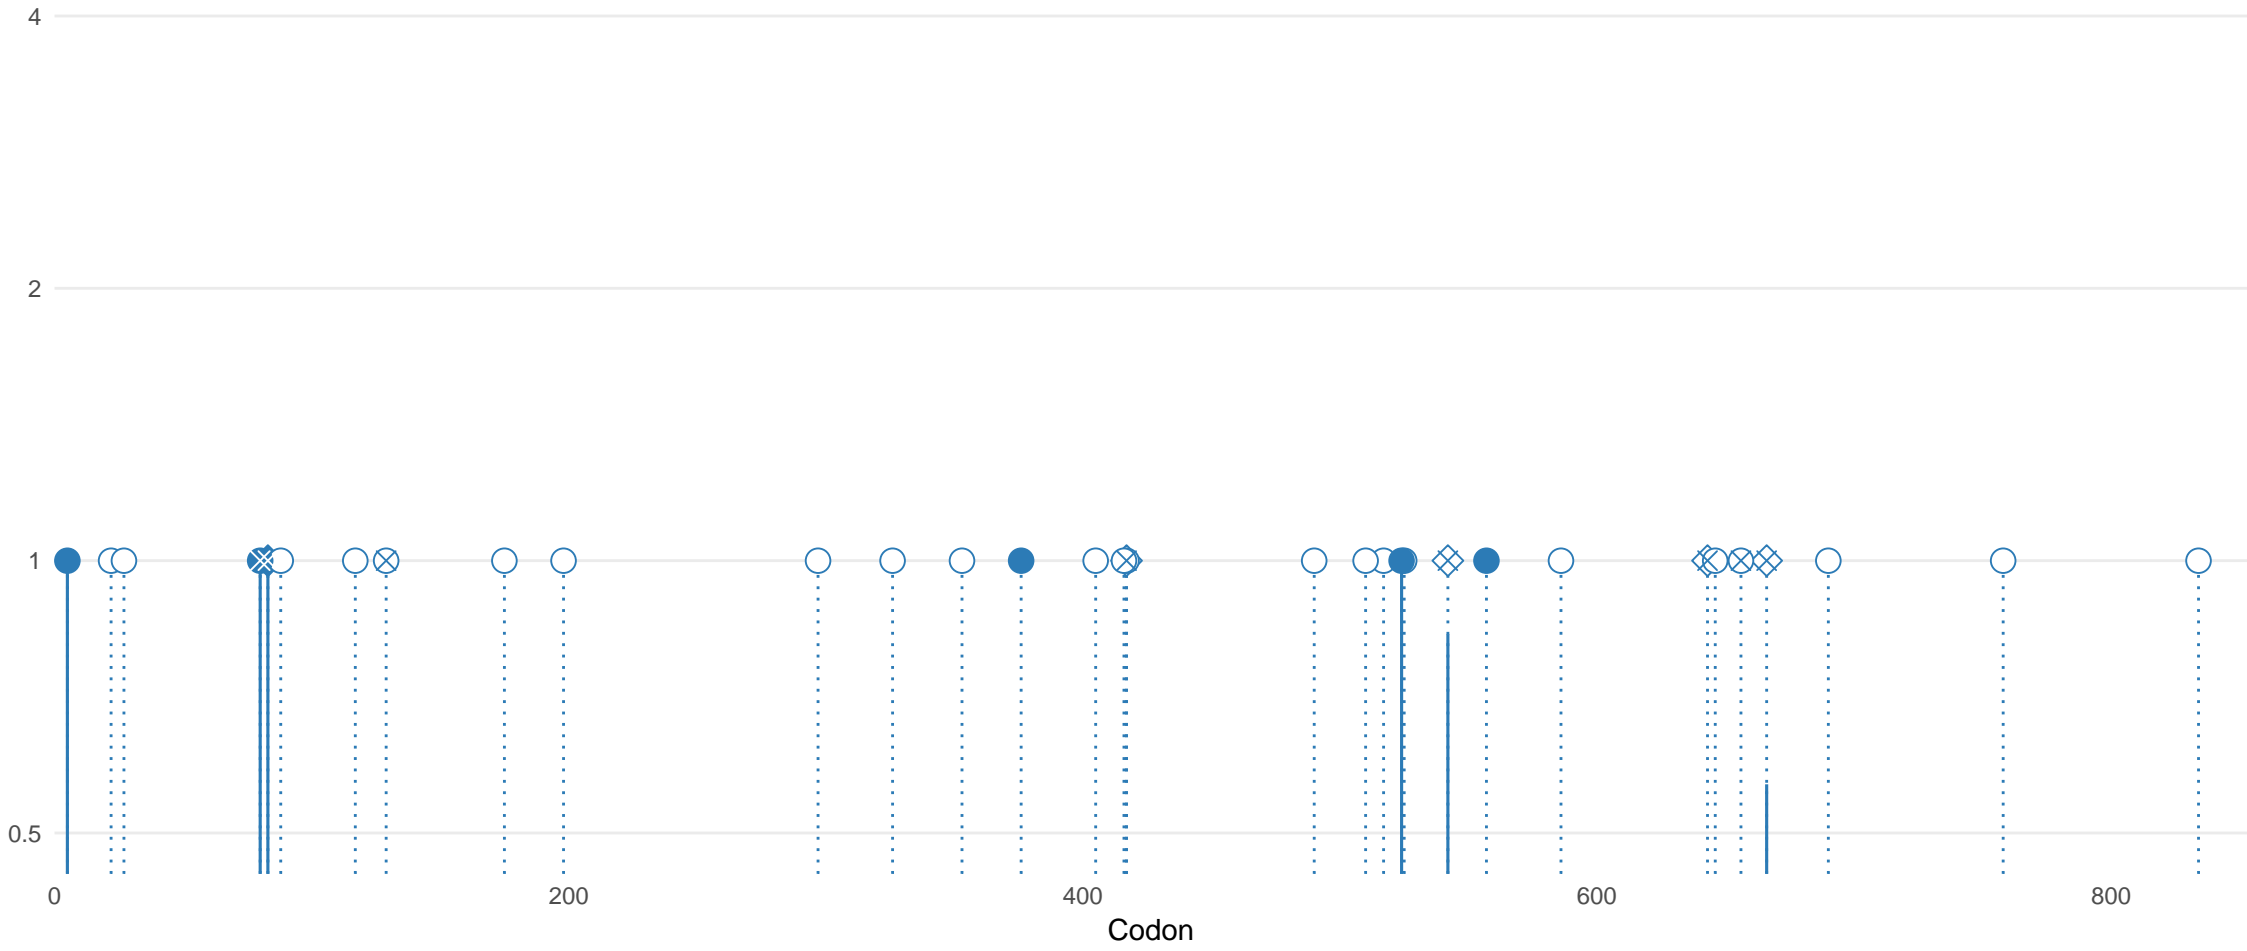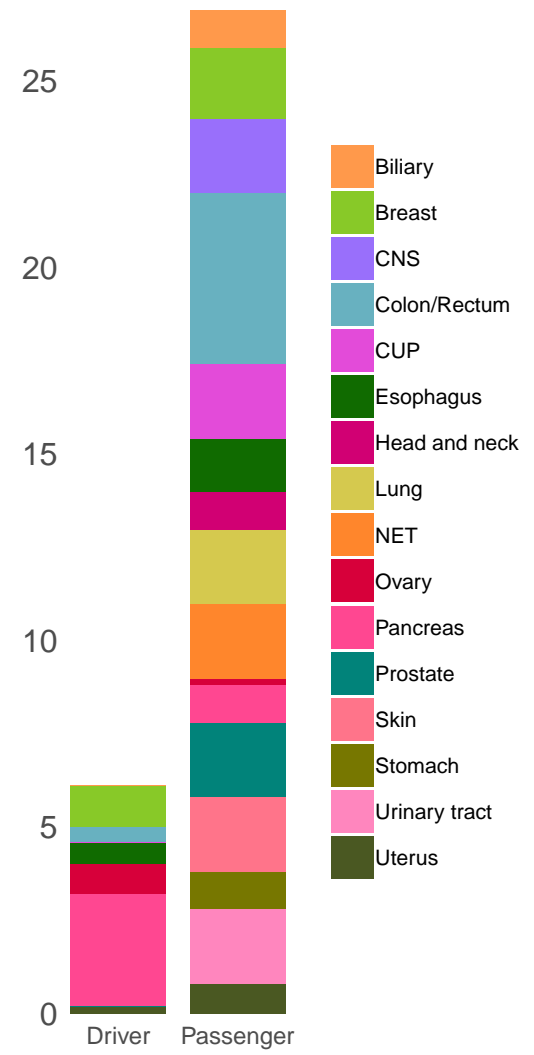

# B2M Variants

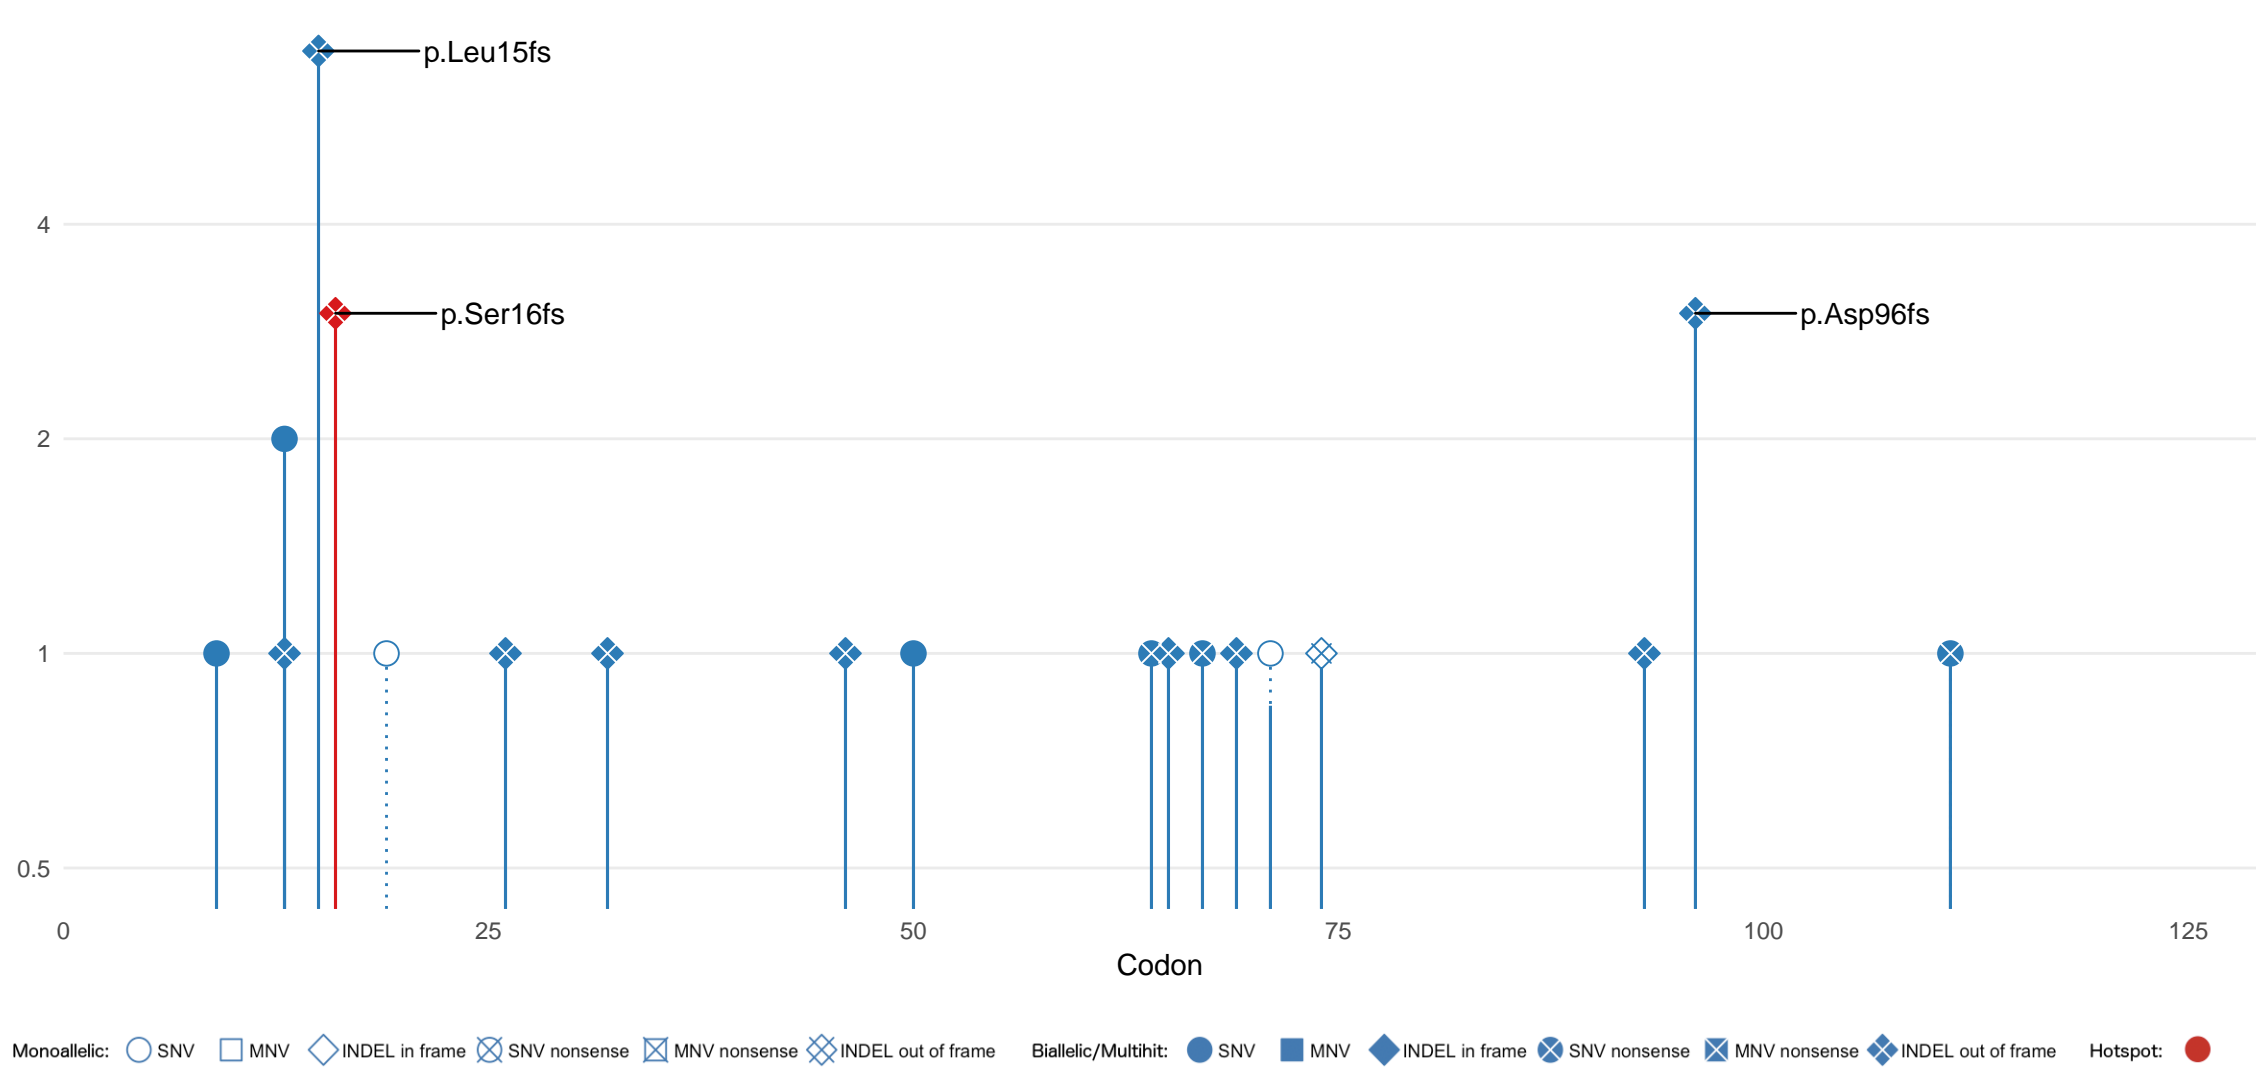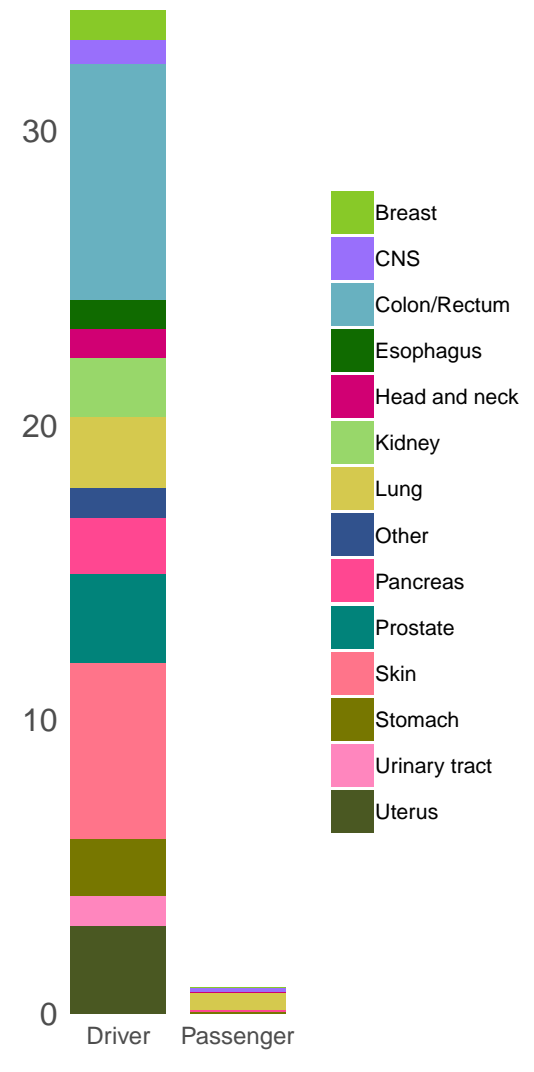

# BAP1 Variants

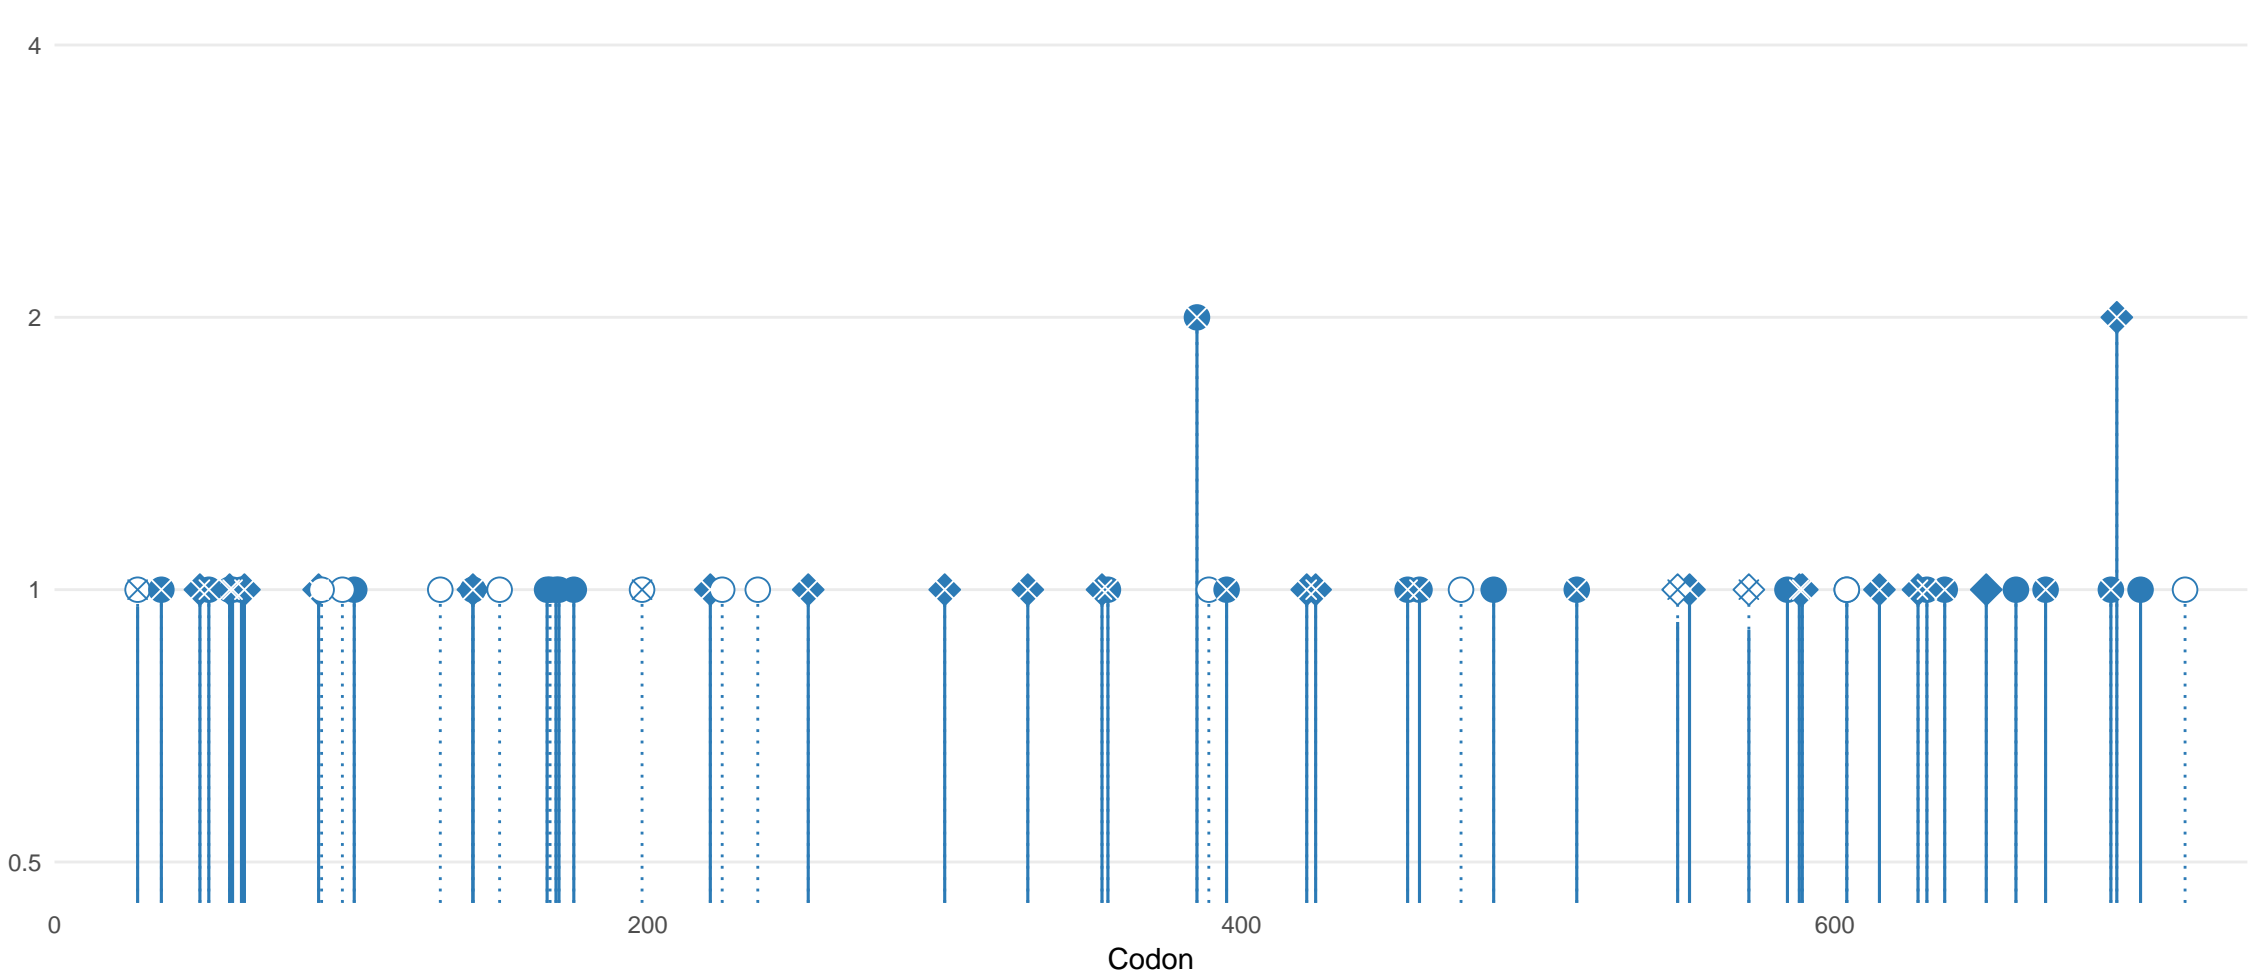

**Monoallelic:** ○ SNV □ MNV ◇ INDEL in frame ⊗ SNV nonsense ⊠ MNV nonsense ⊡ INDEL out of frame  
**Biallelic/Multihit:** ● SNV ■ MNV ◆ INDEL in frame ⊗ SNV nonsense ⊠ MNV nonsense ⊡ INDEL out of frame  
**Hotspot:** ●

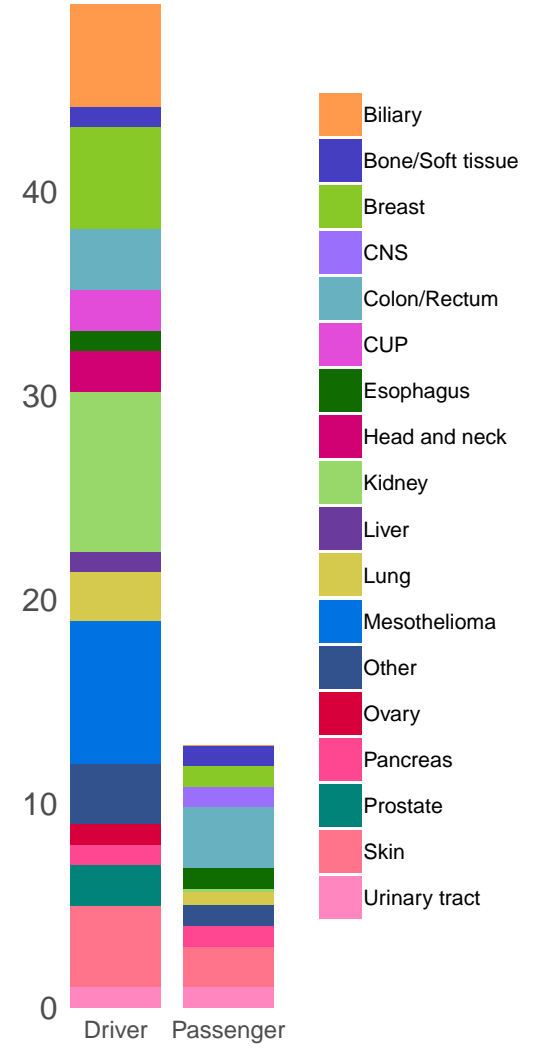

Driver Passenger

- Biliary
- Bone/Soft tissue
- Breast
- CNS
- Colon/Rectum
- CUP
- Esophagus
- Head and neck
- Kidney
- Liver
- Lung
- Mesothelioma
- Other
- Ovary
- Pancreas
- Prostate
- Skin
- Urinary tract

# BCL9L Variants

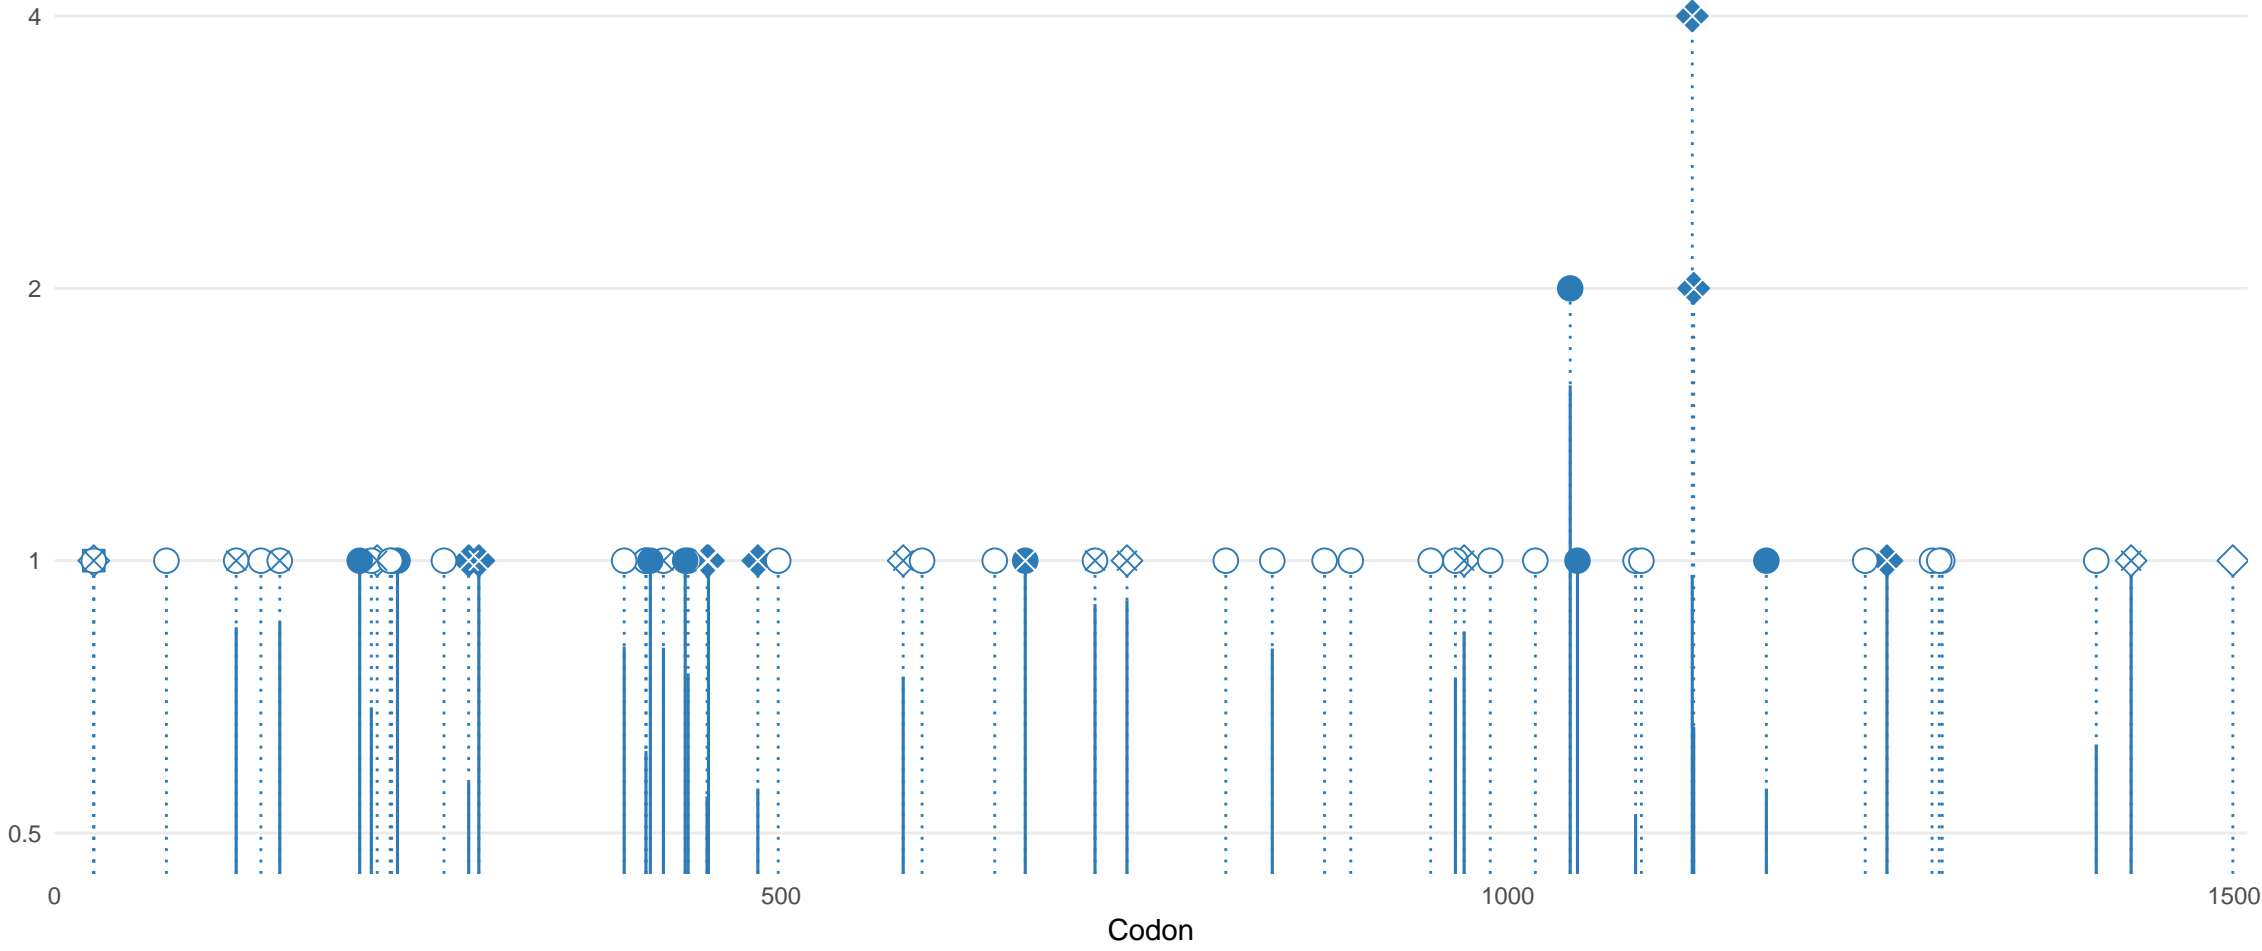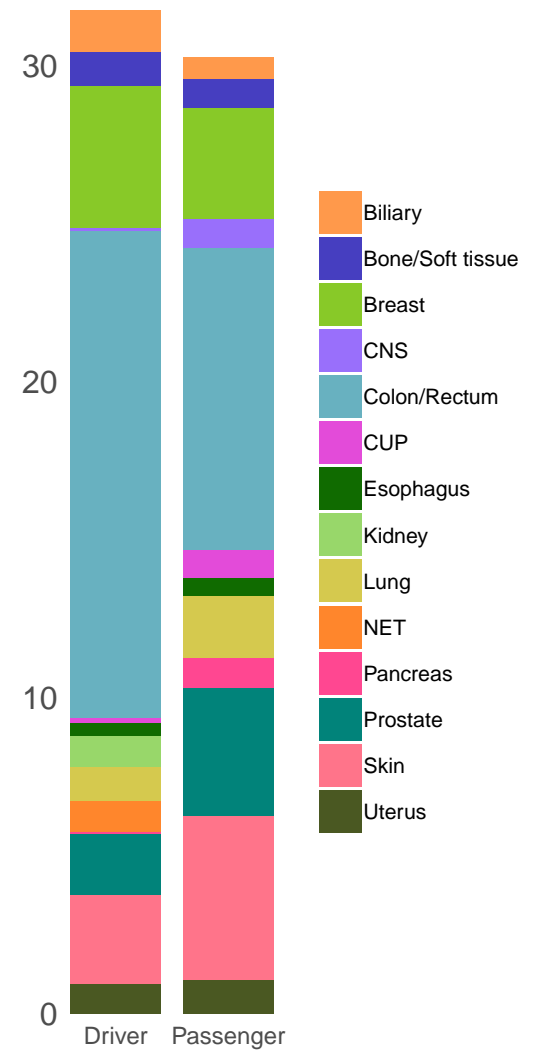

Monoallelic: ○ SNV □ MNV ◇ INDEL in frame ⊗ SNV nonsense ⊠ MNV nonsense ⊞ INDEL out of frame Biallelic/Multihit: ● SNV ■ MNV ◆ INDEL in frame ⊗ SNV nonsense ⊠ MNV nonsense ⊞ INDEL out of frame Hotspot: ● (Red)

# BCOR Variants

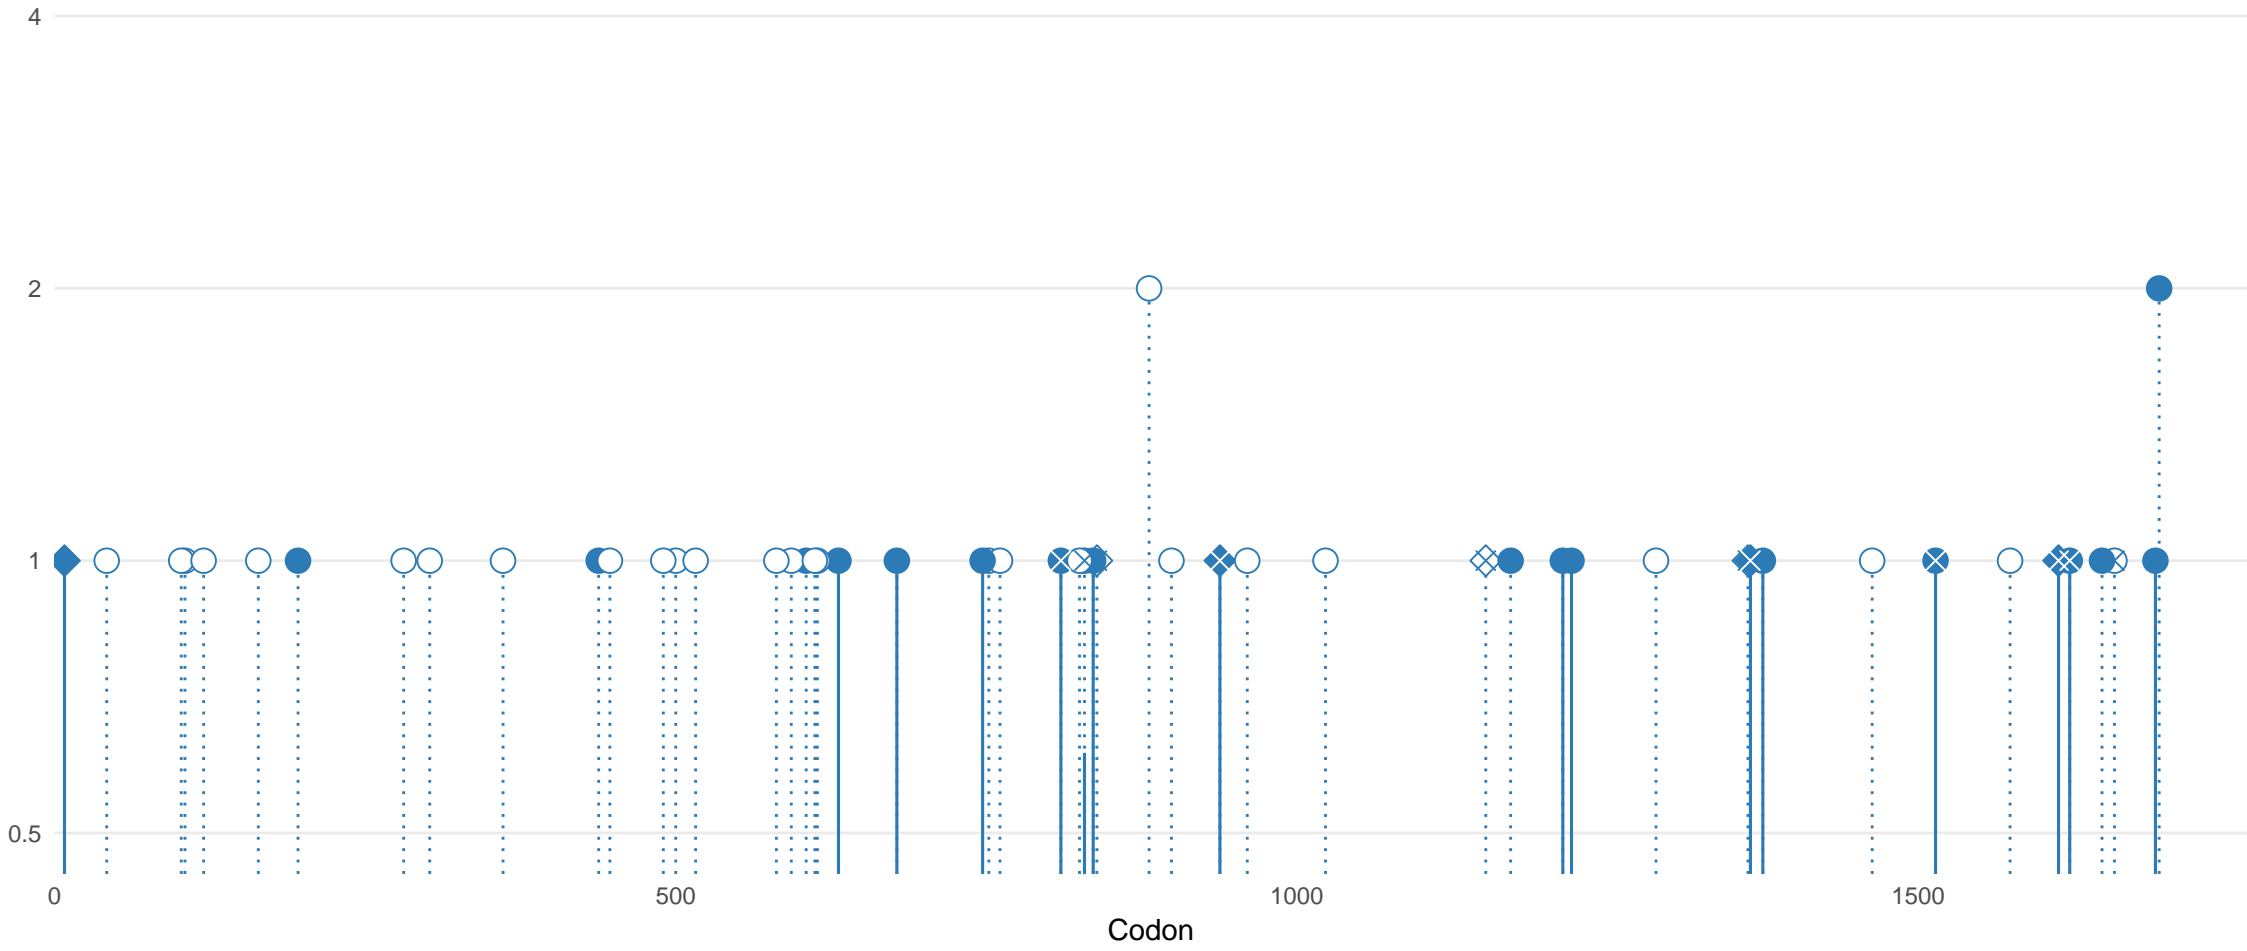

**Monoallelic:** ○ SNV □ MNV ◇ INDEL in frame ⊗ SNV nonsense ⊗ MNV nonsense ⊗ INDEL out of frame  
**Biallelic/Multihit:** ● SNV ■ MNV ◆ INDEL in frame ⊗ SNV nonsense ⊗ MNV nonsense ◆ INDEL out of frame  
**Hotspot:** ●

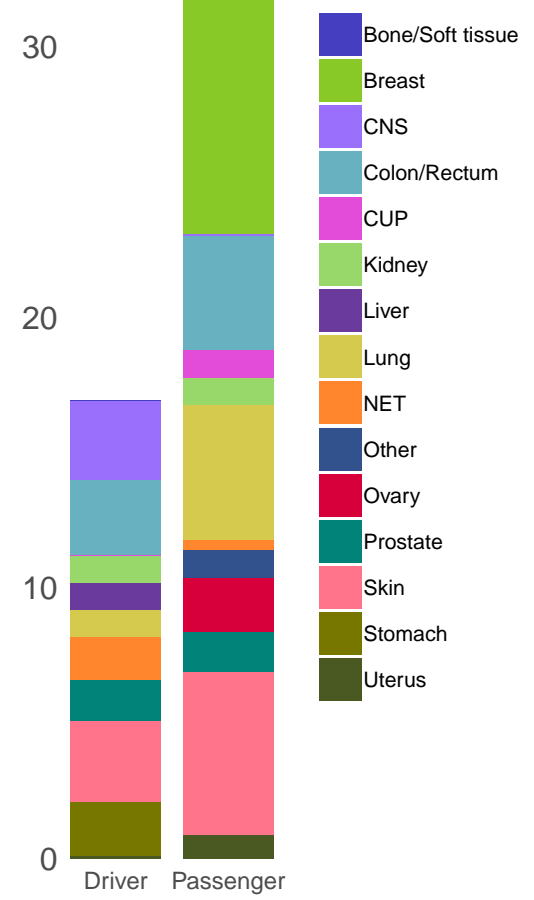

# BMPR2 Variants

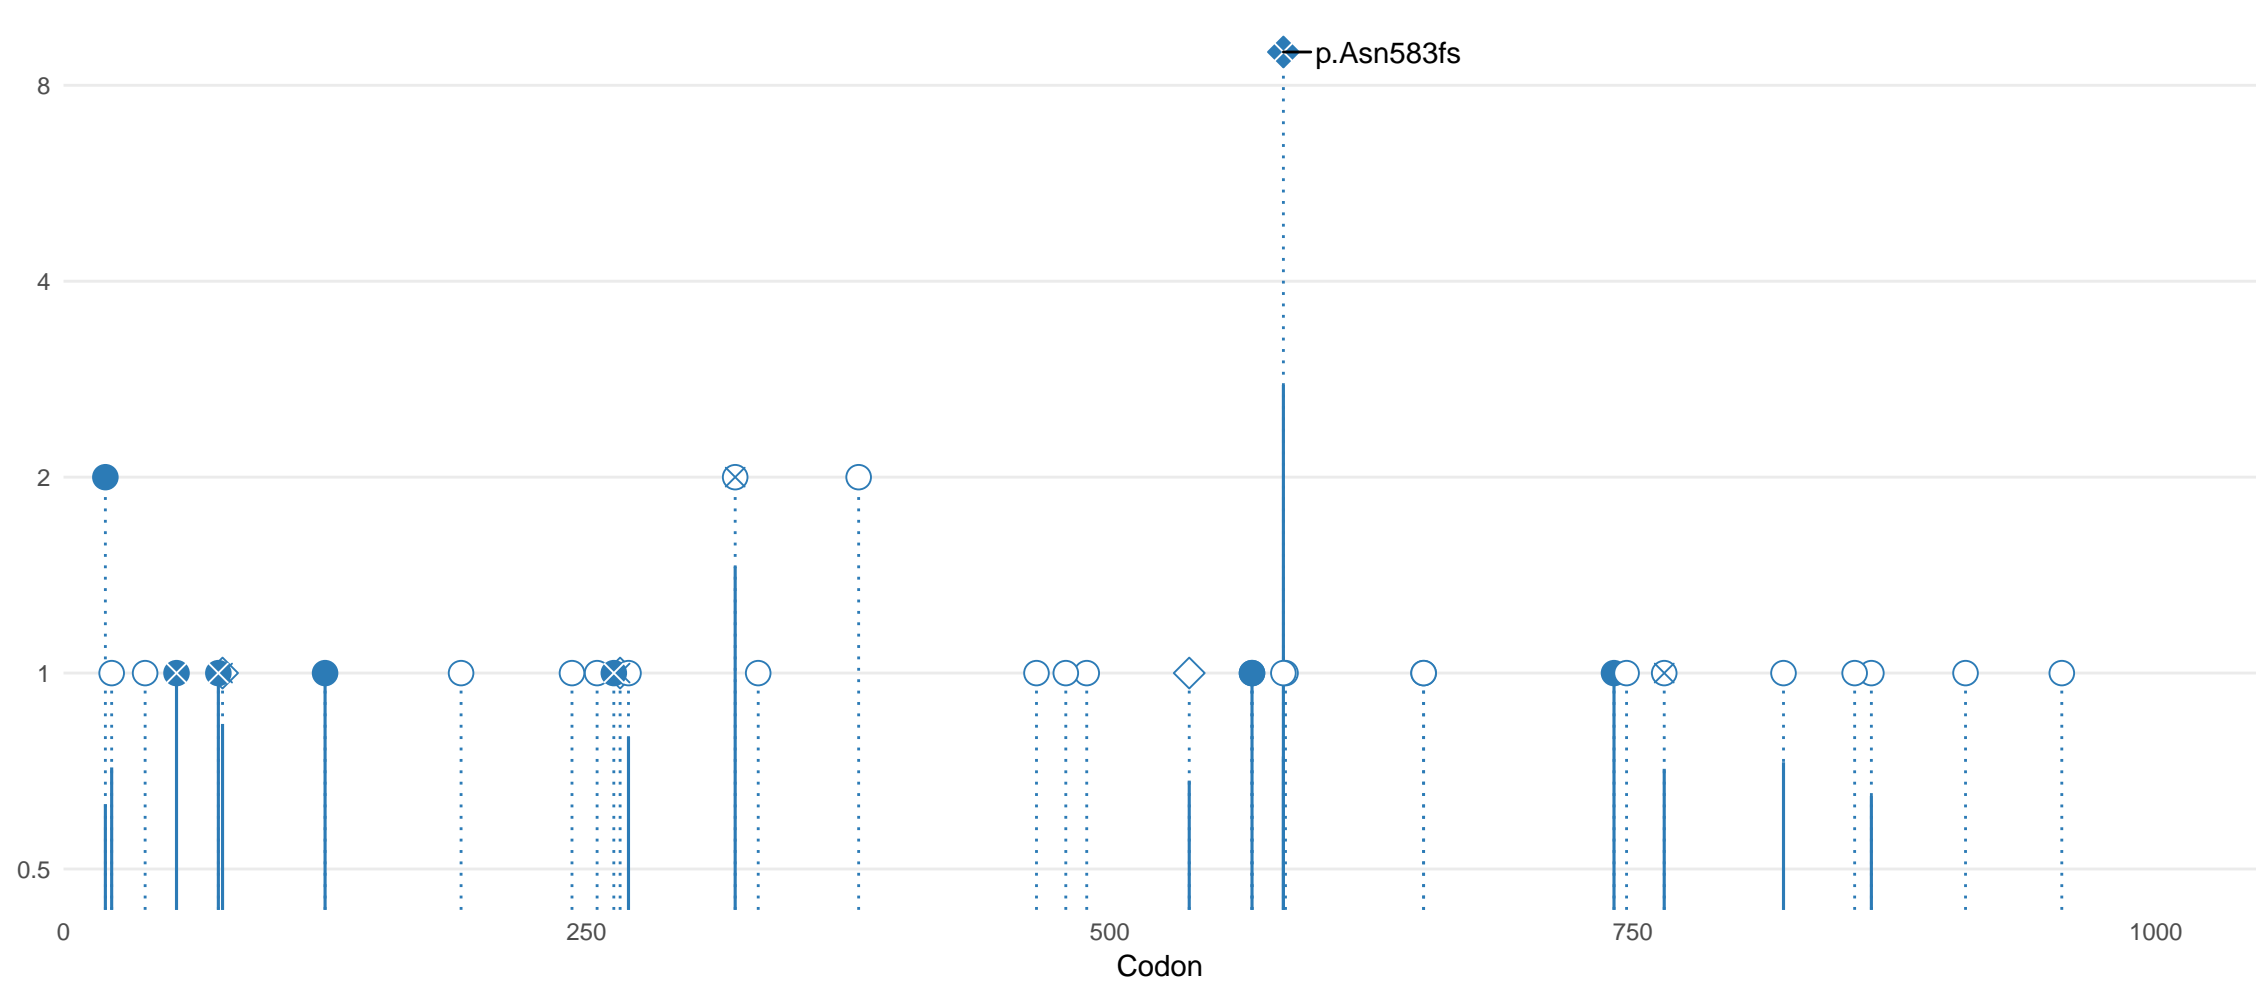

**Monoallelic:** ○ SNV □ MNV ◇ INDEL in frame ⊗ SNV nonsense ⊗ MNV nonsense ⊗ INDEL out of frame  
**Biallelic/Multihit:** ● SNV ■ MNV ◆ INDEL in frame ⊗ SNV nonsense ⊗ MNV nonsense ◆ INDEL out of frame  
**Hotspot:** ●

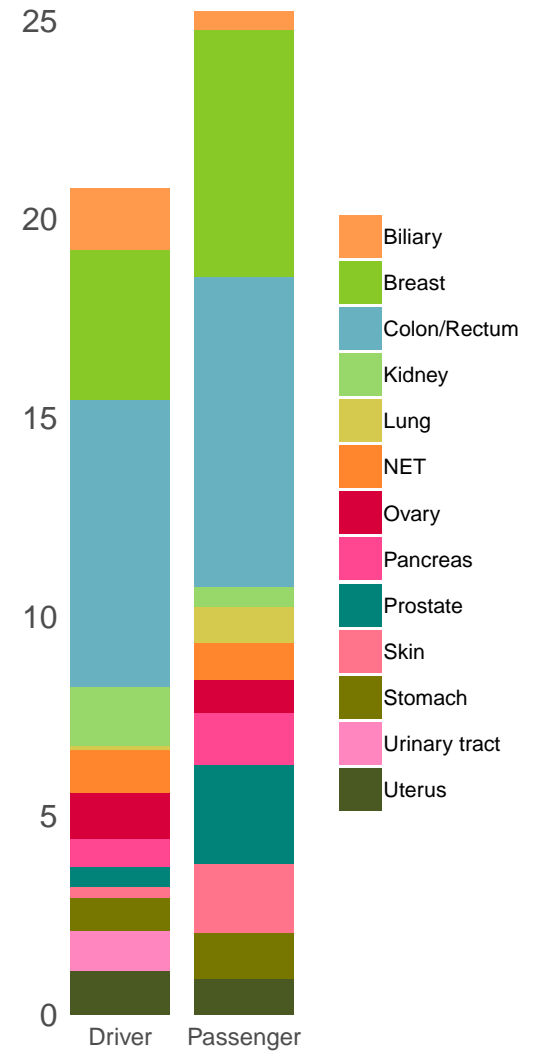

# BRCA1 Variants

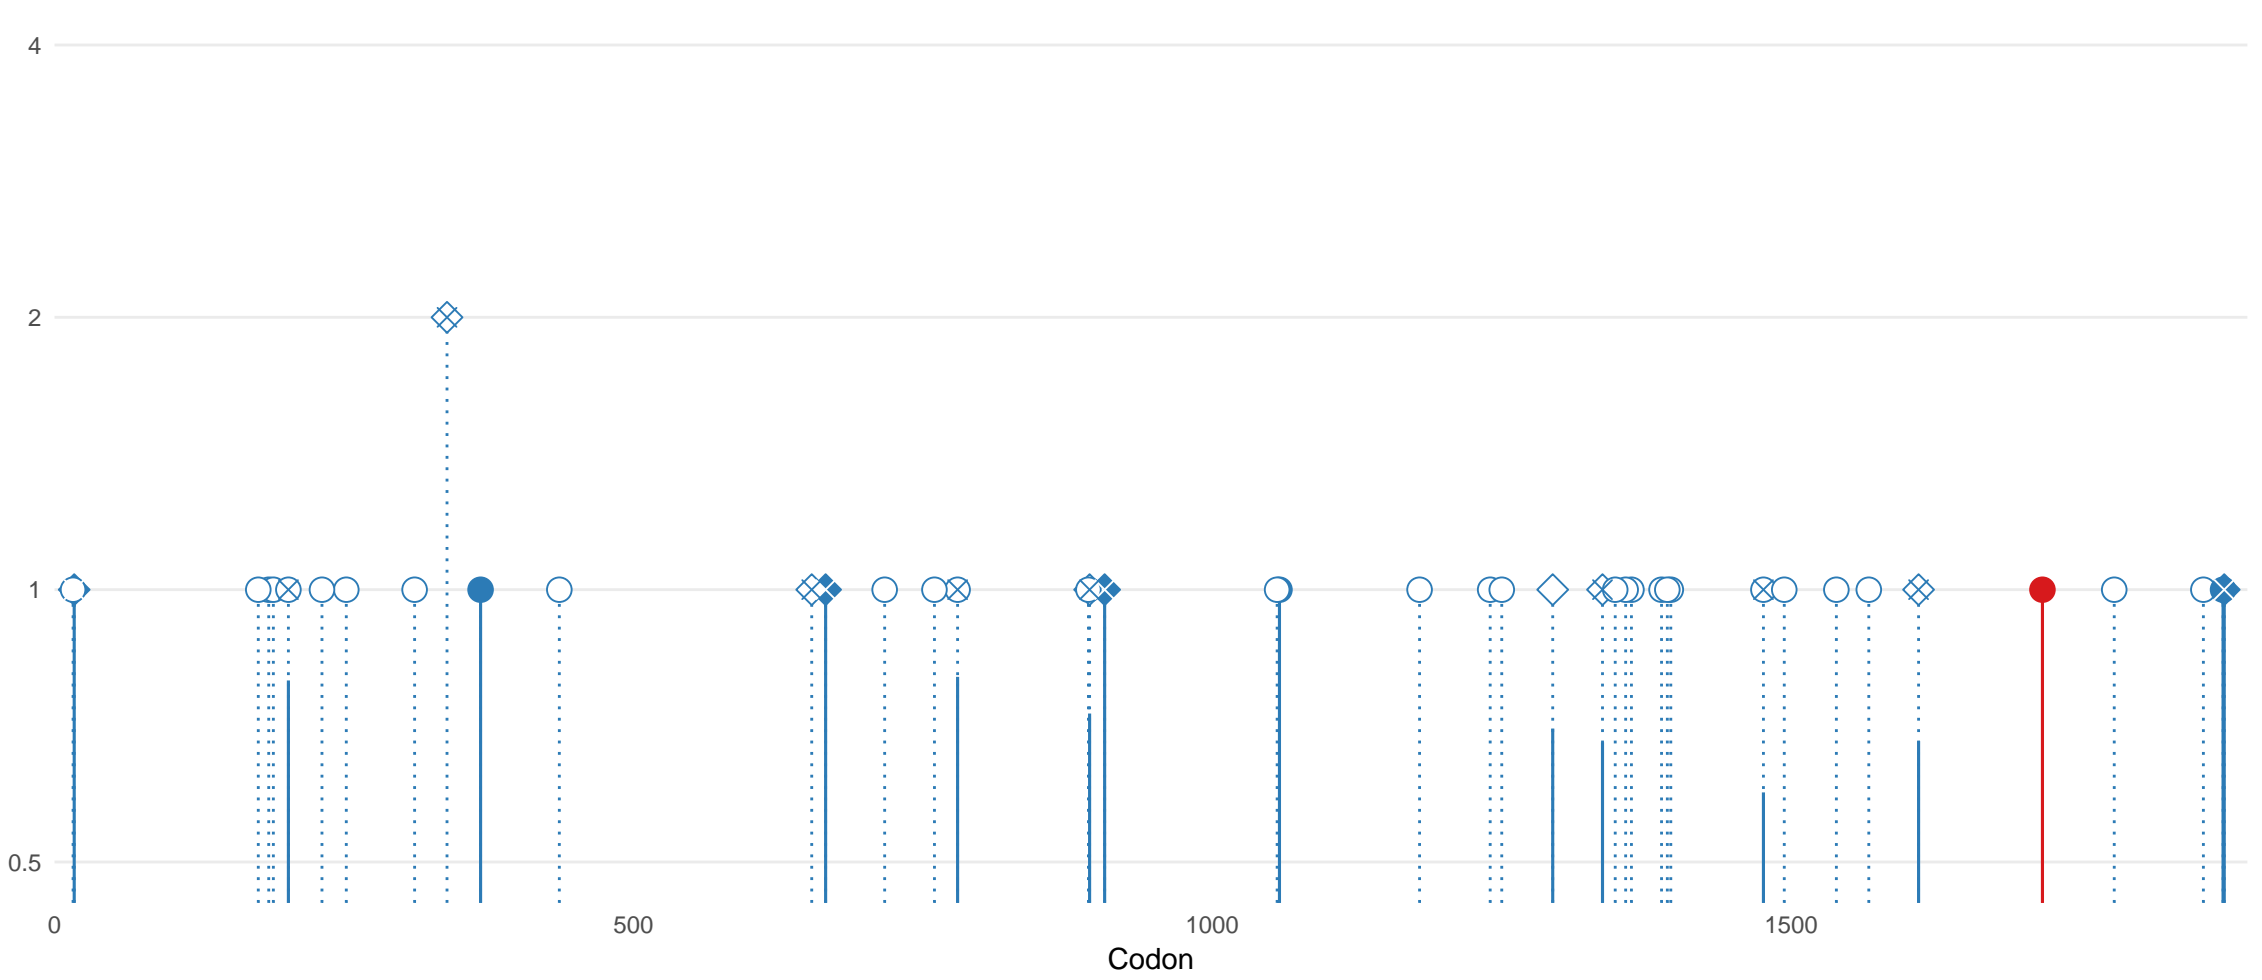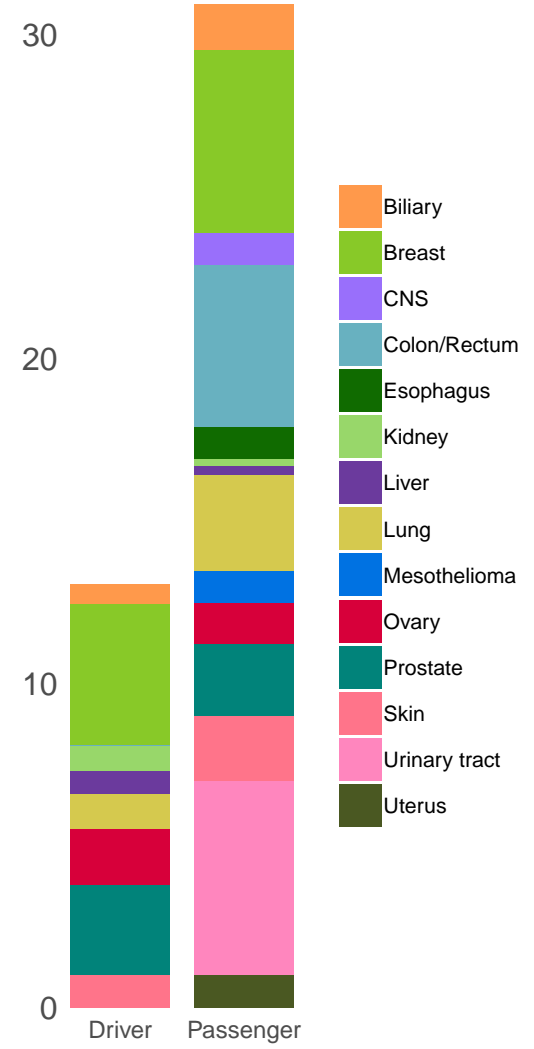

# BRCA2 Variants

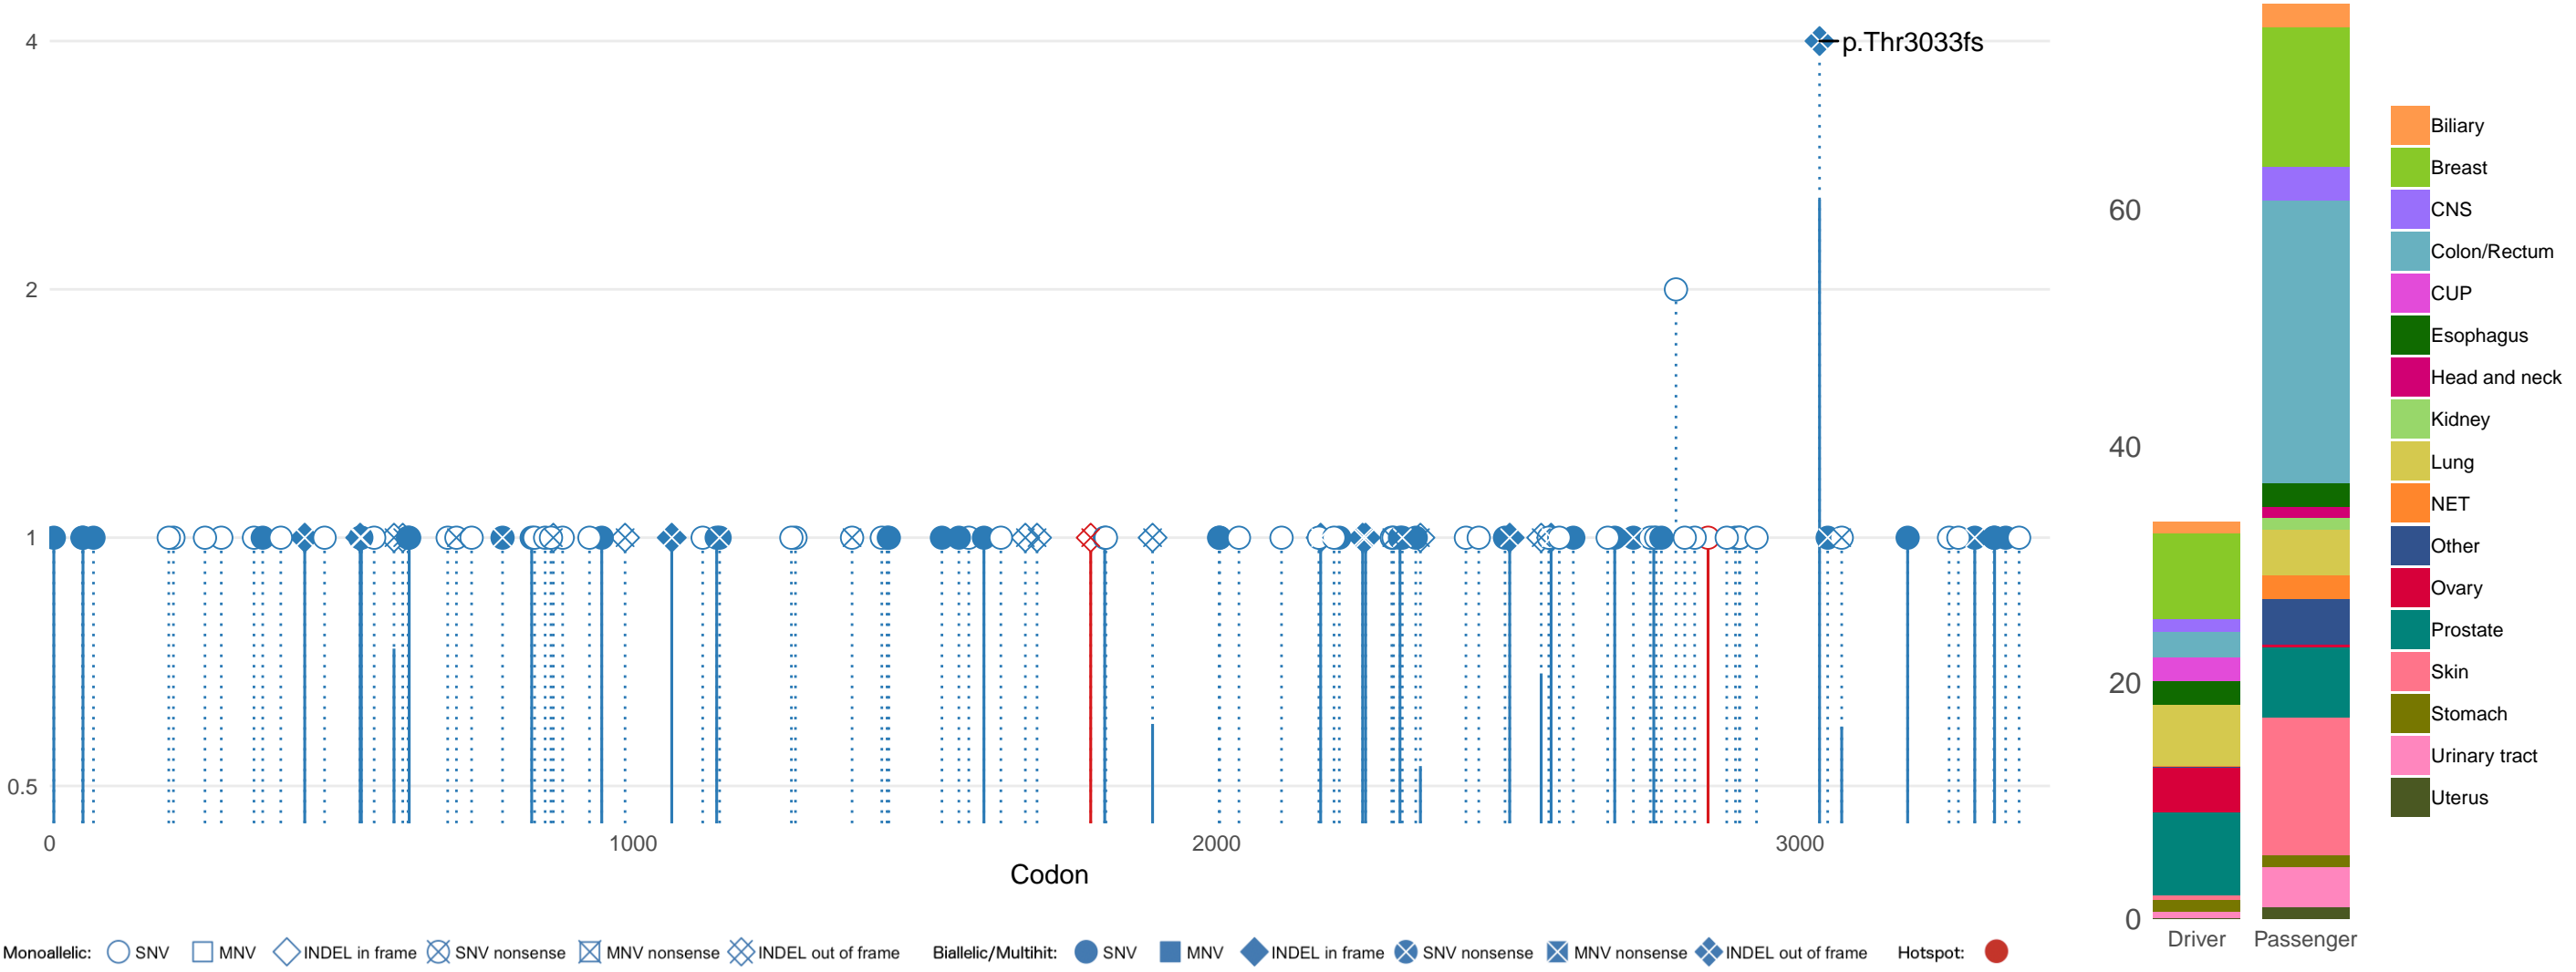



# BRD7 Variants

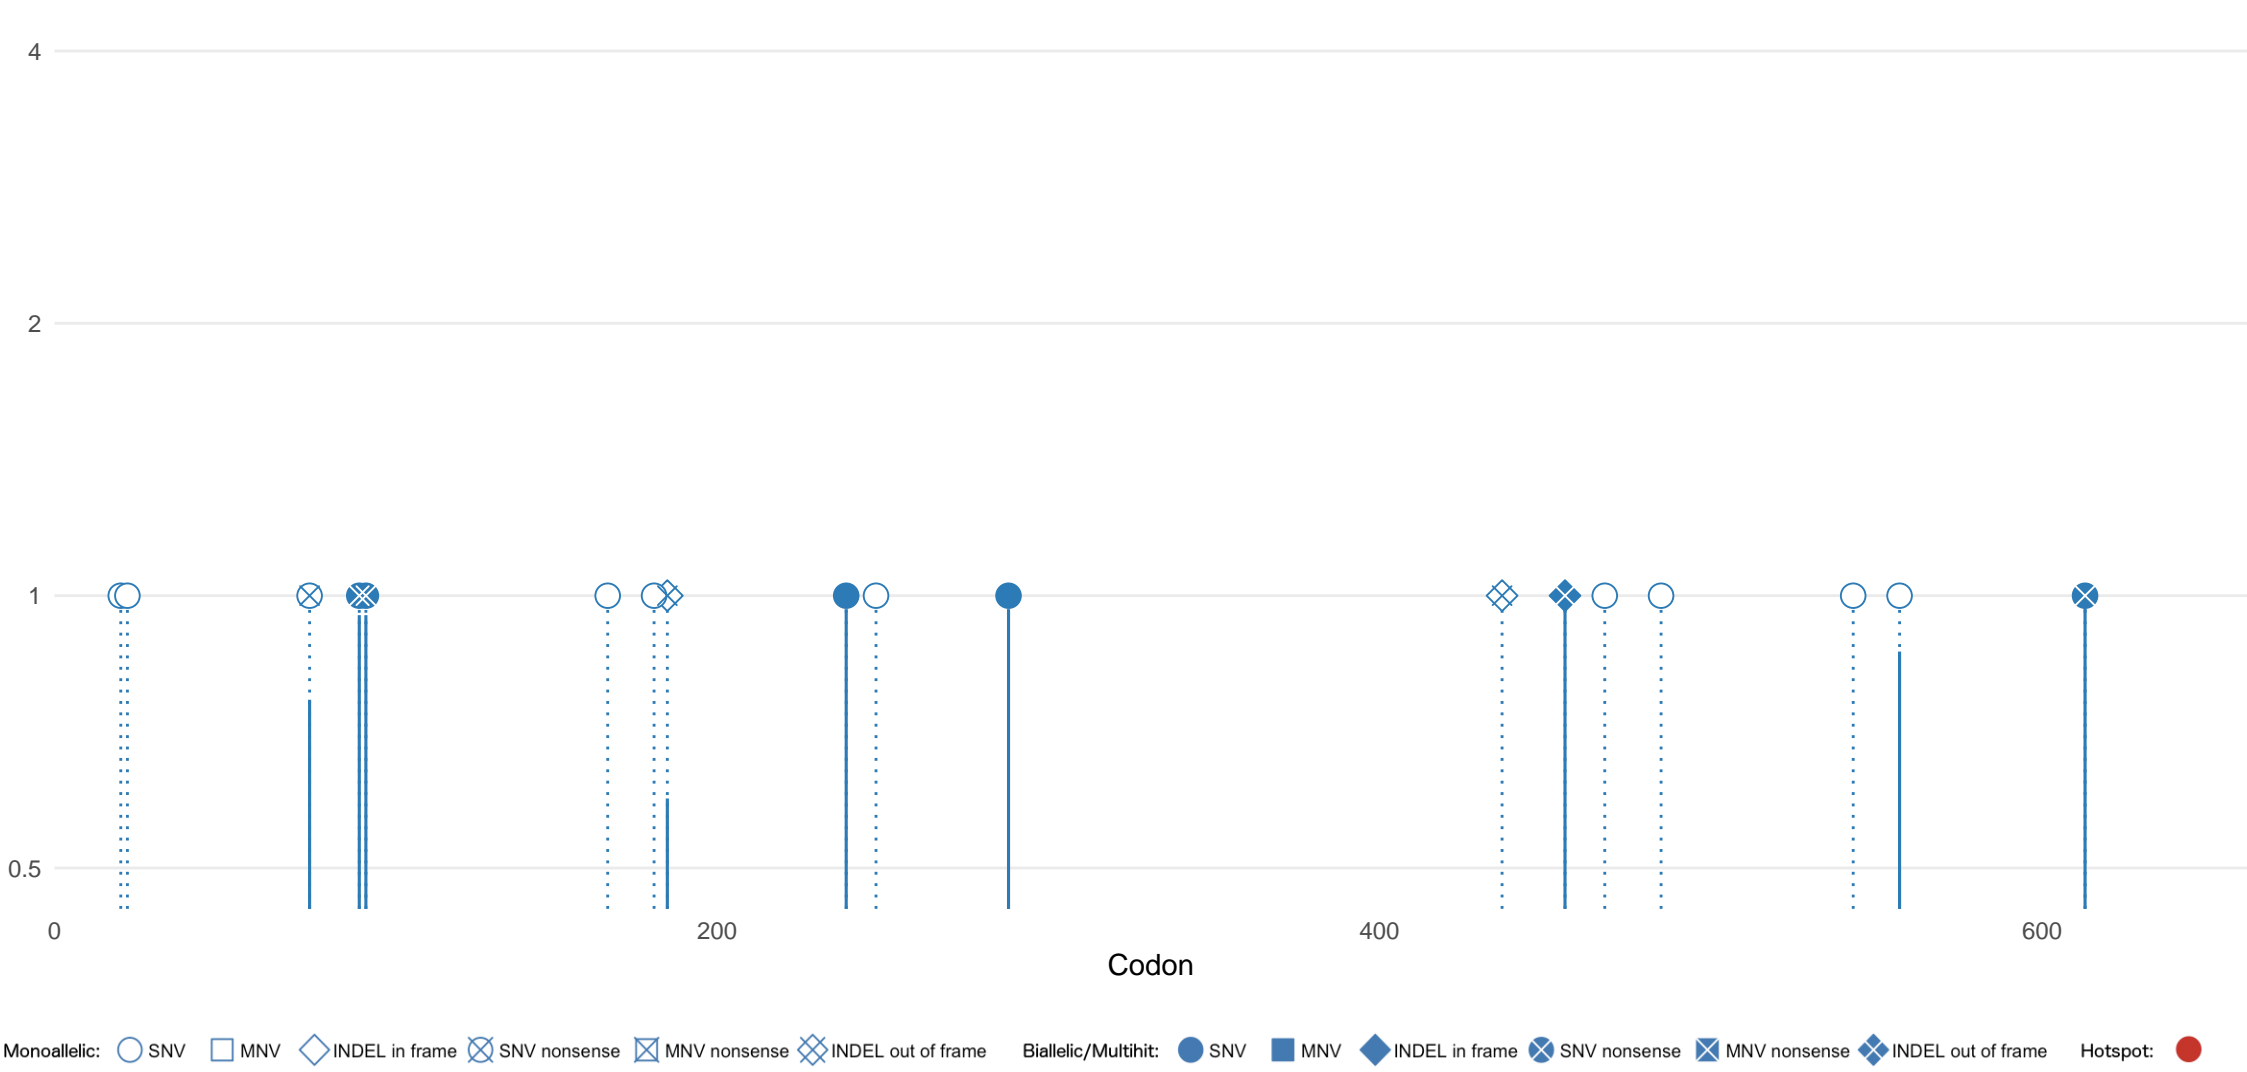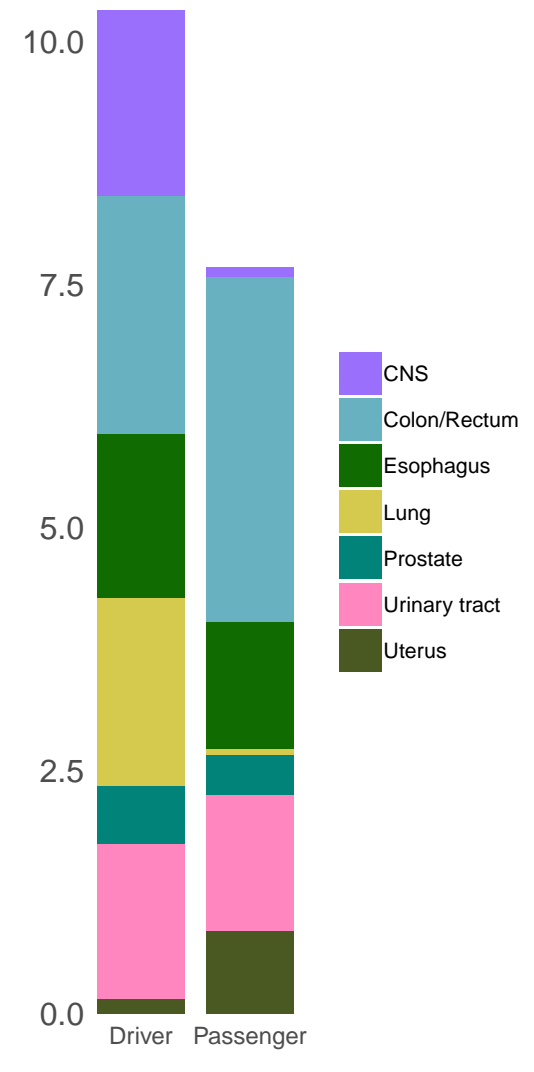

# CASP8 Variants

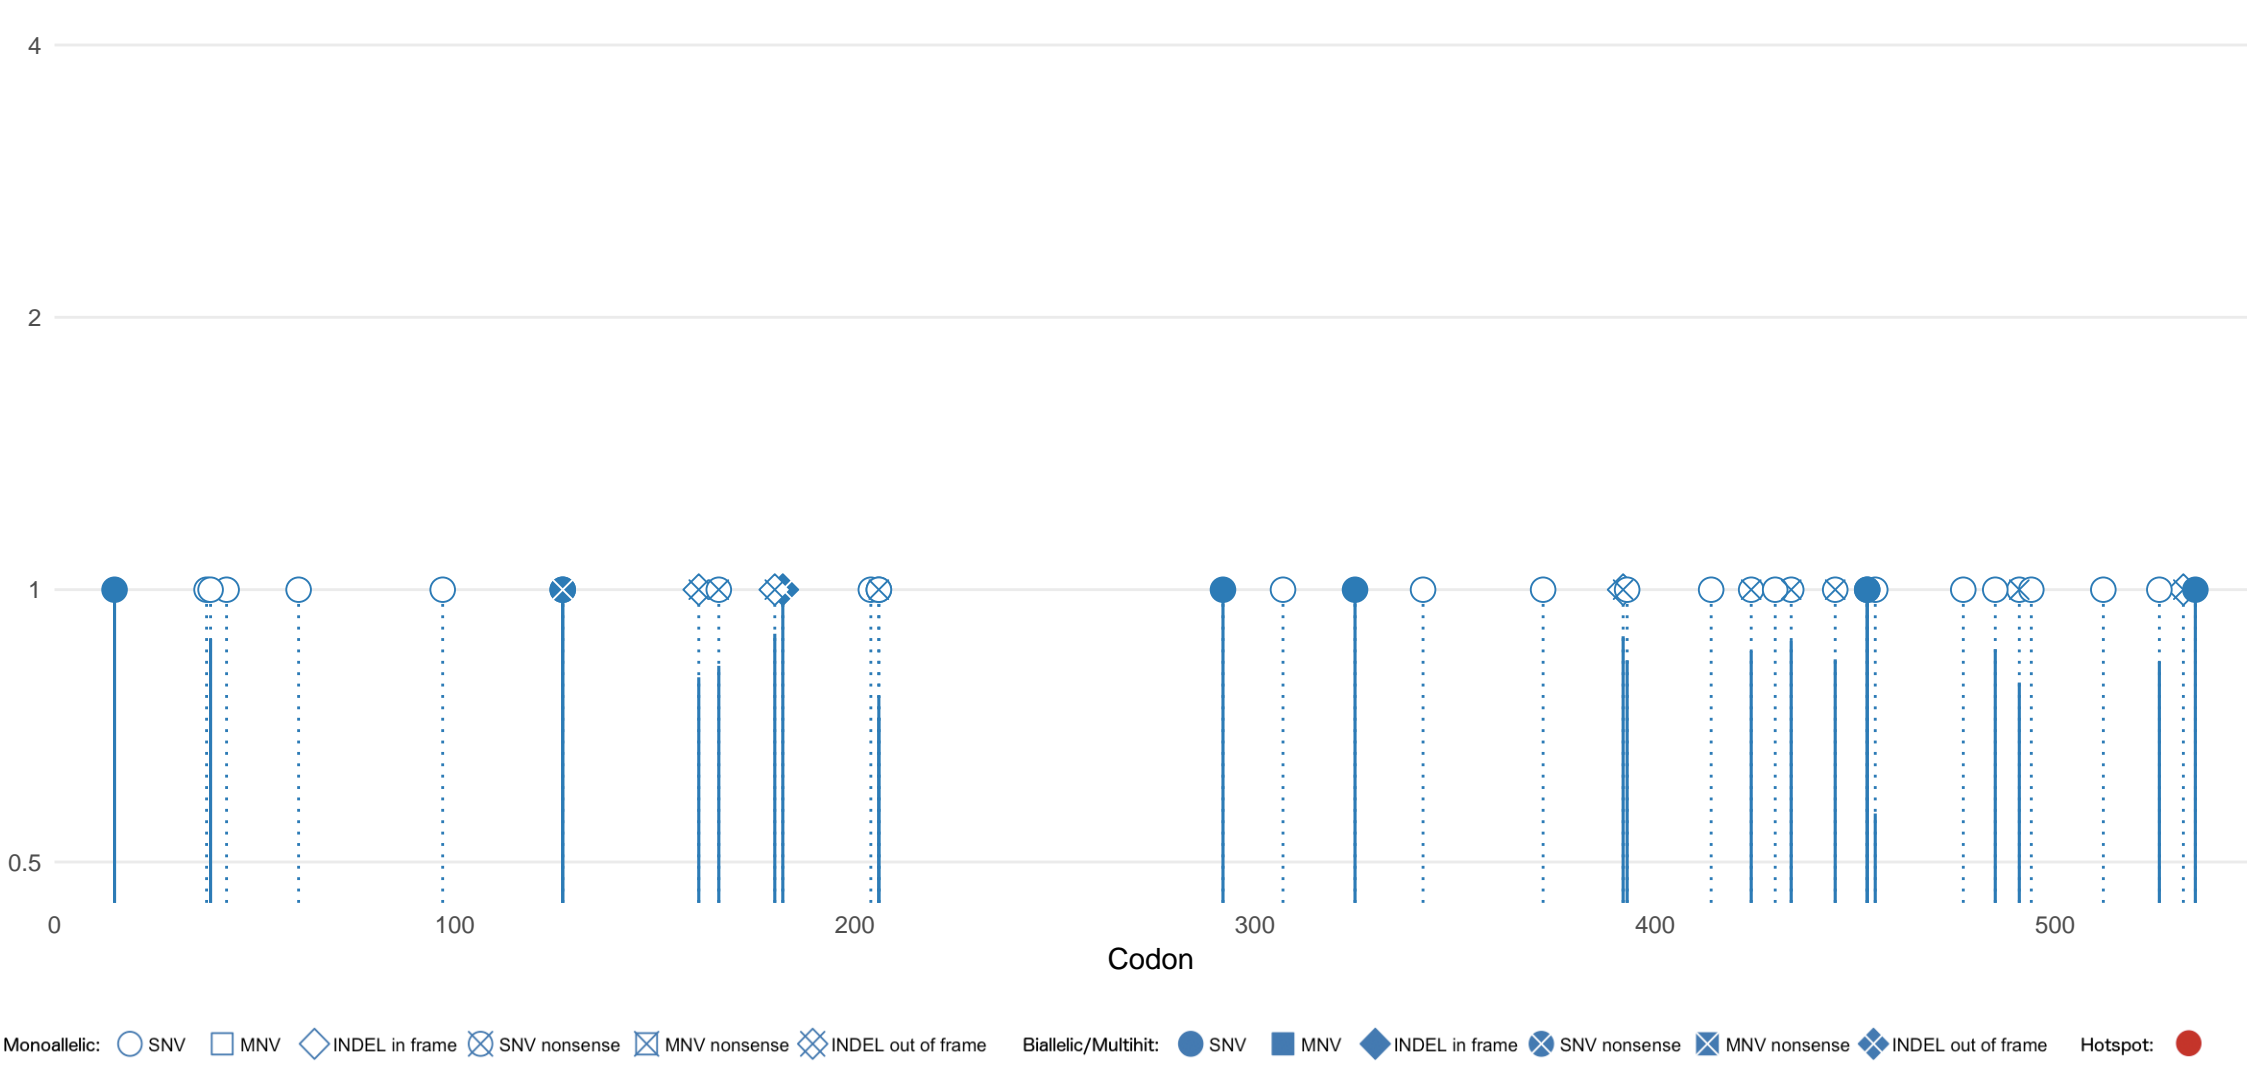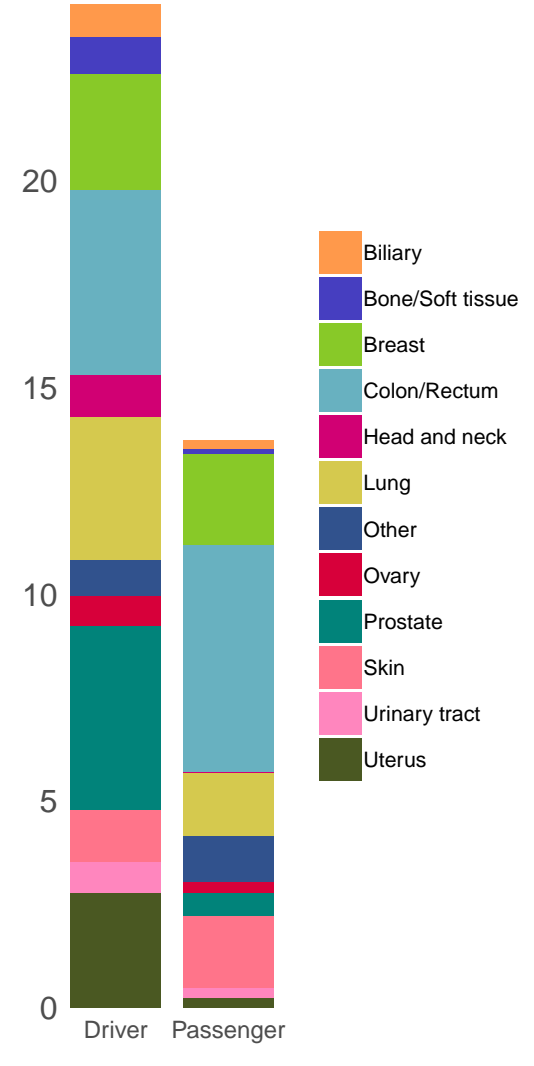

# CBFB Variants

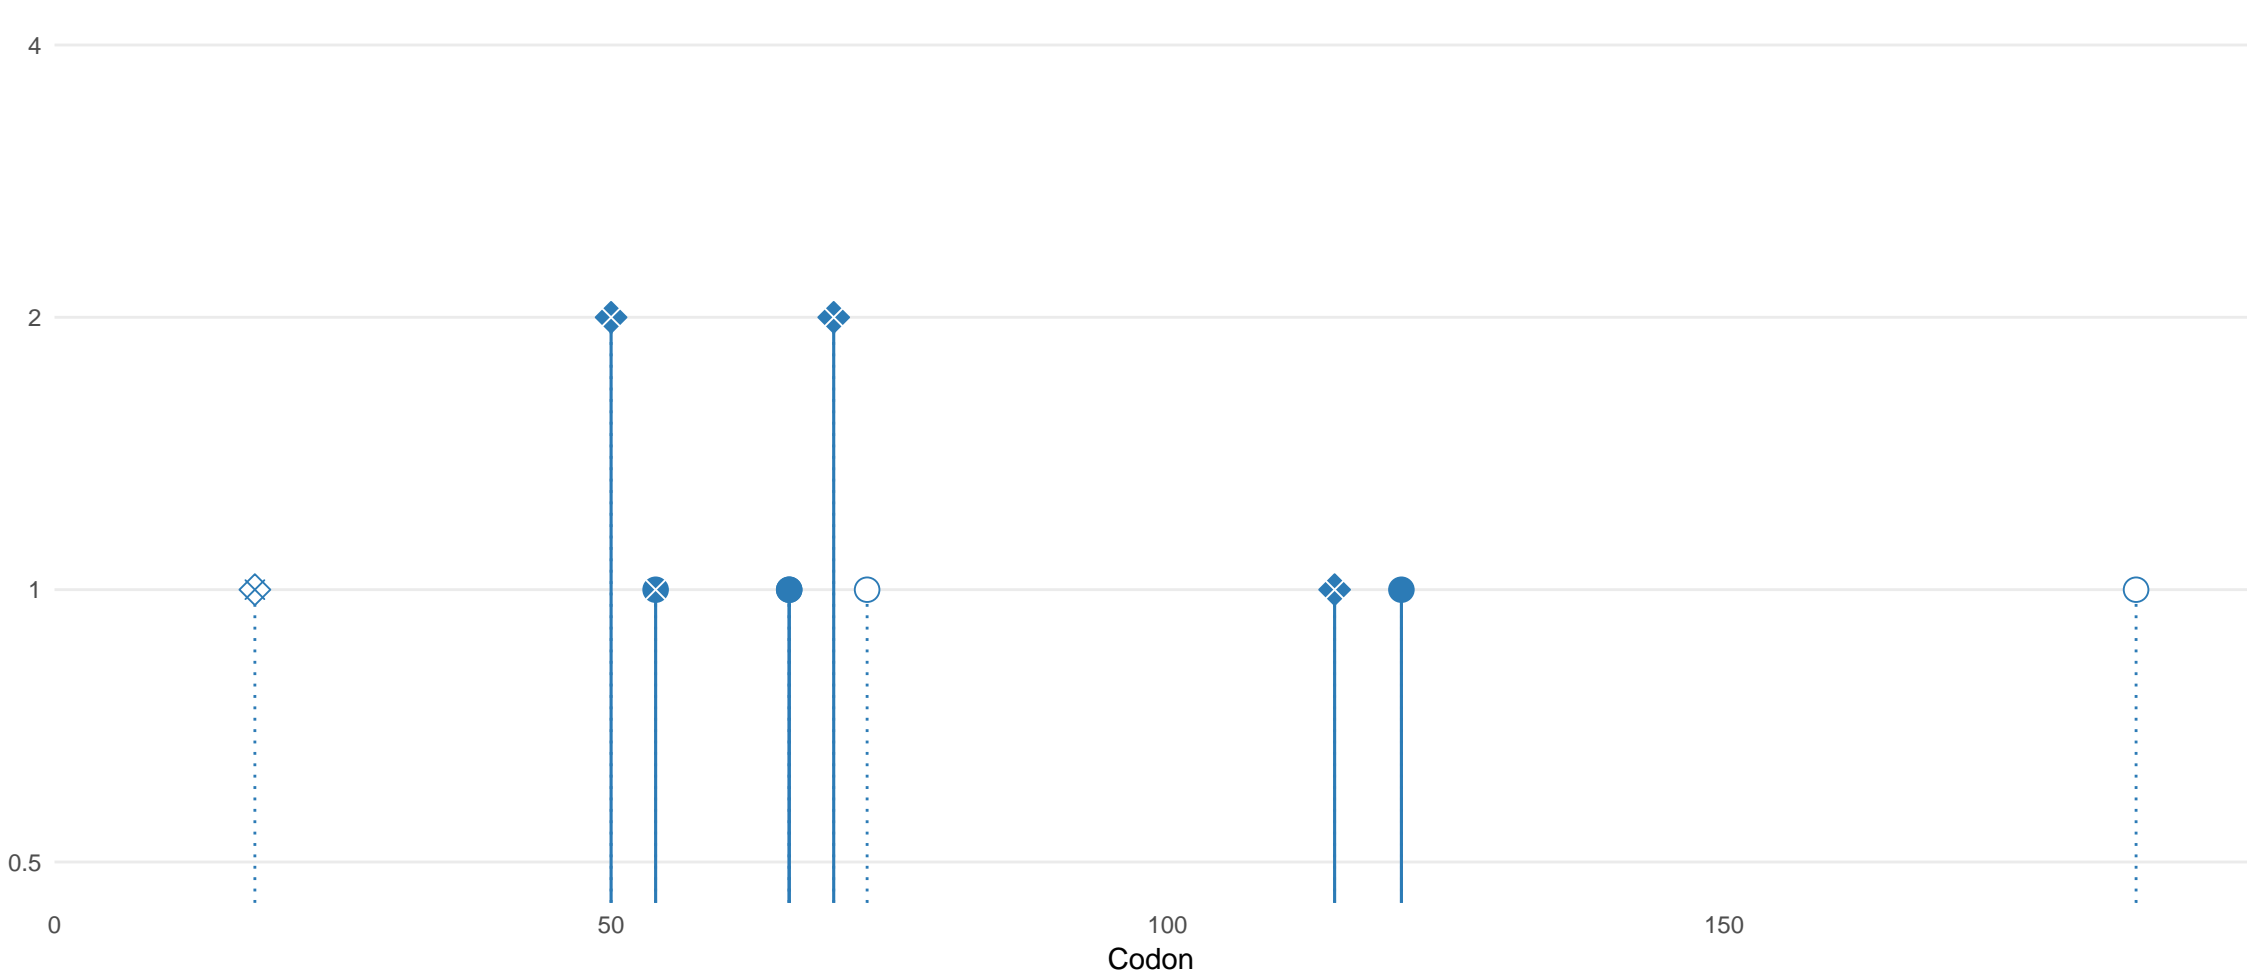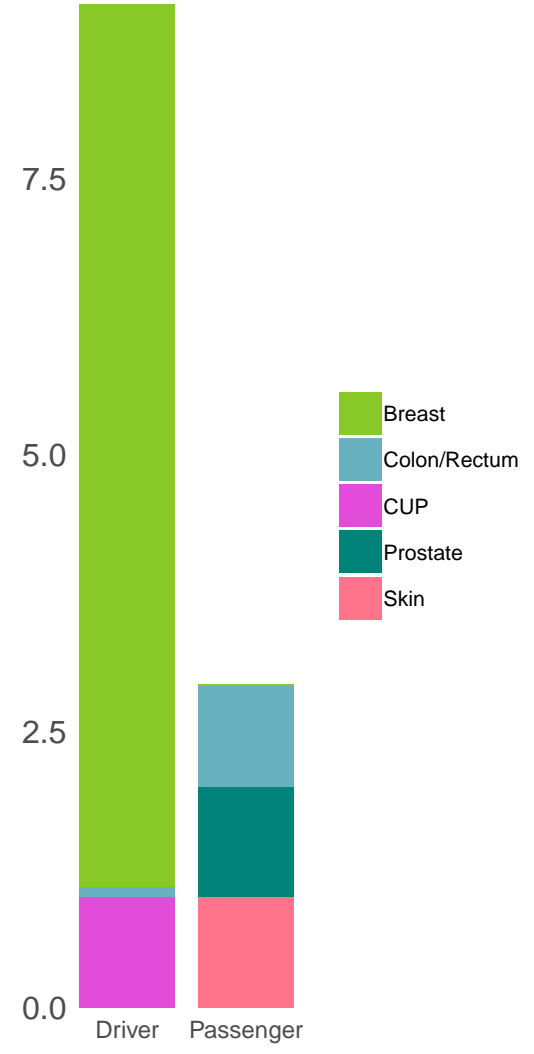

Monoallelic: ○ SNV □ MNV ◇ INDEL in frame ⊗ SNV nonsense ⊠ MNV nonsense ⊞ INDEL out of frame Biallelic/Multihit: ● SNV ■ MNV ◆ INDEL in frame ⊗ SNV nonsense ⊠ MNV nonsense ⊞ INDEL out of frame Hotspot: ●

# CBL Variants

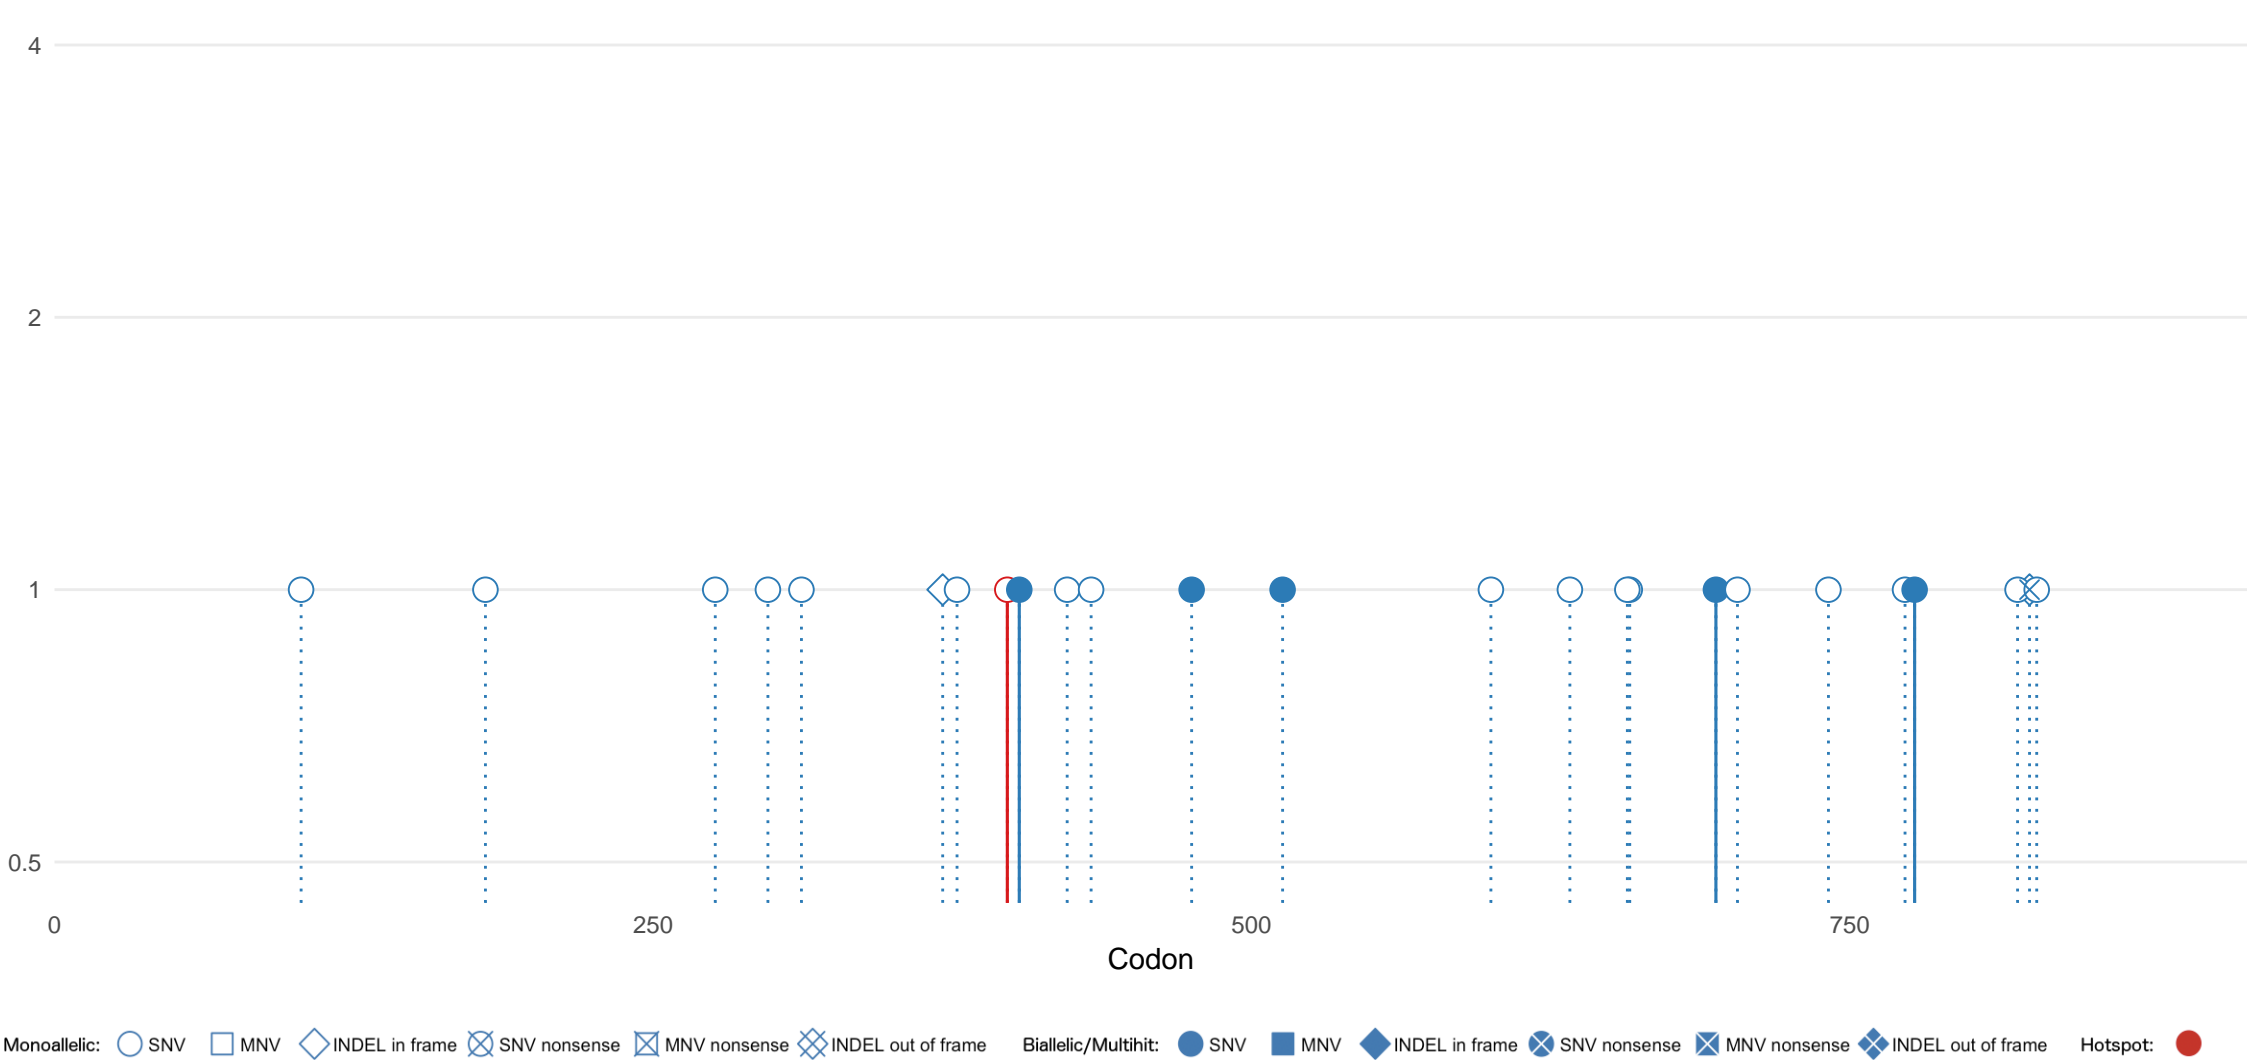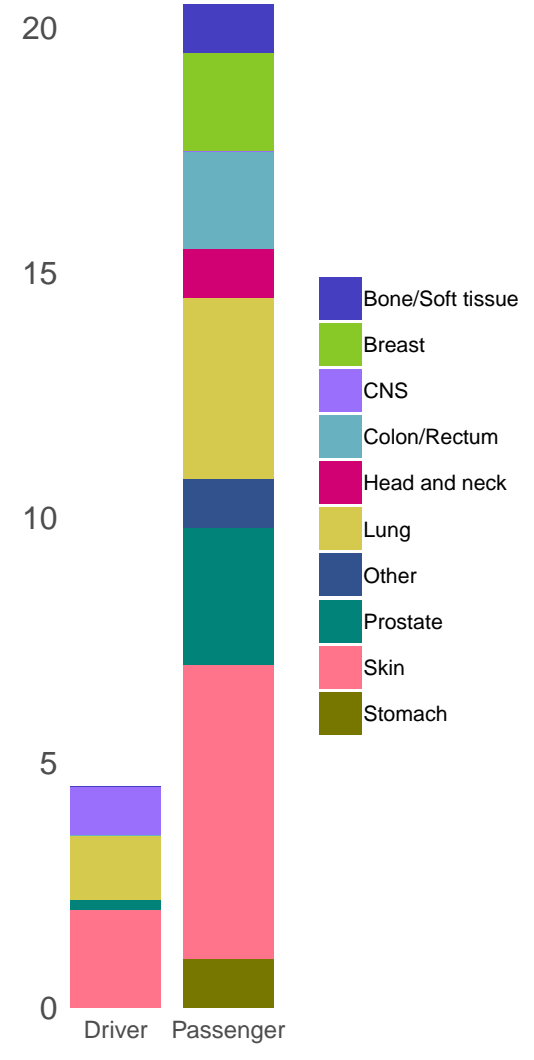

# CBLB Variants

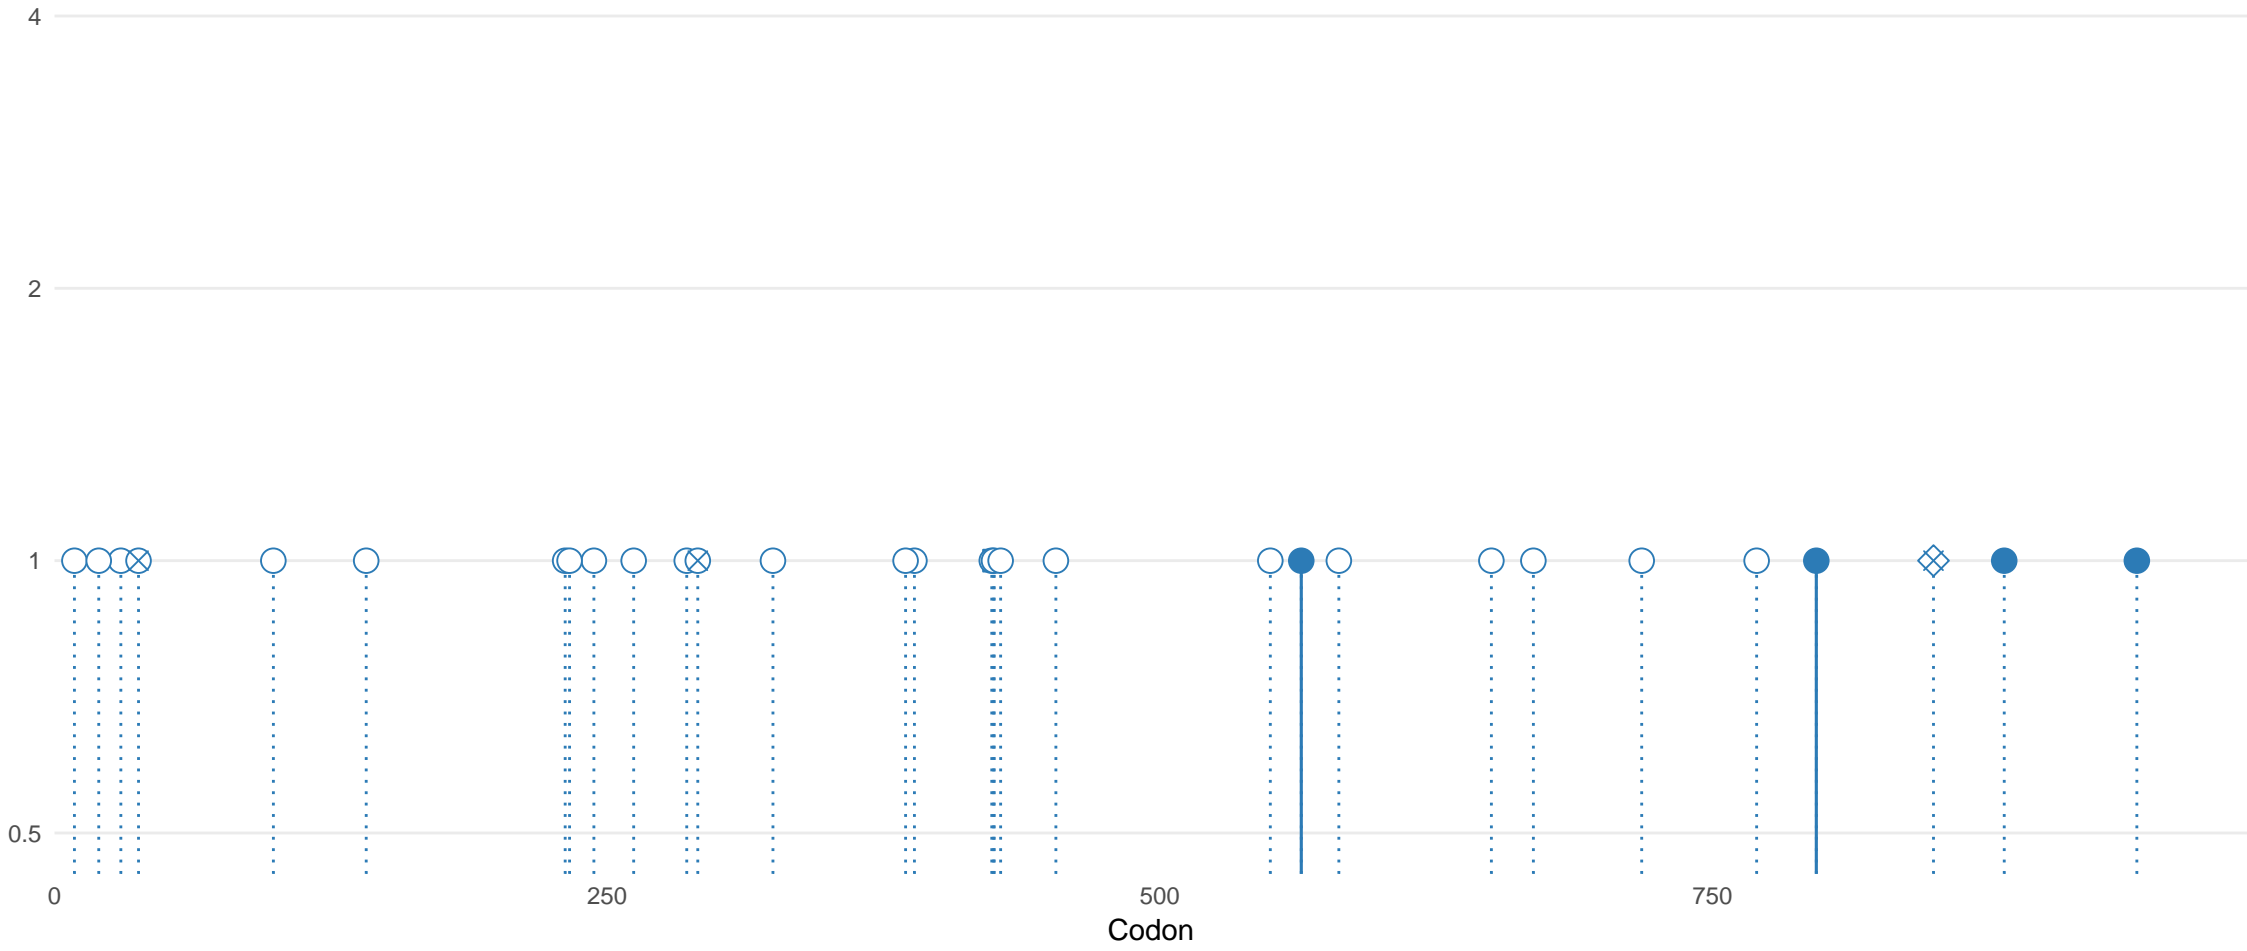

**Monoallelic:** ○ SNV □ MNV ◇ INDEL in frame ⊗ SNV nonsense ⊠ MNV nonsense ⬠ INDEL out of frame  
**Biallelic/Multihit:** ● SNV ■ MNV ◆ INDEL in frame ⊗ SNV nonsense ⊠ MNV nonsense ⬠ INDEL out of frame  
**Hotspot:** ●

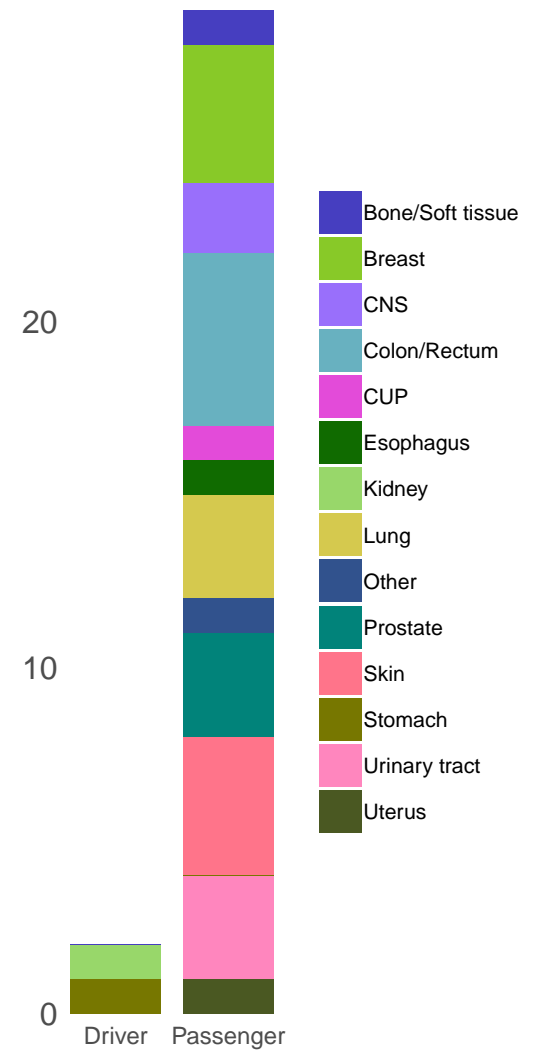

**Driver** **Passenger**

# CD58 Variants

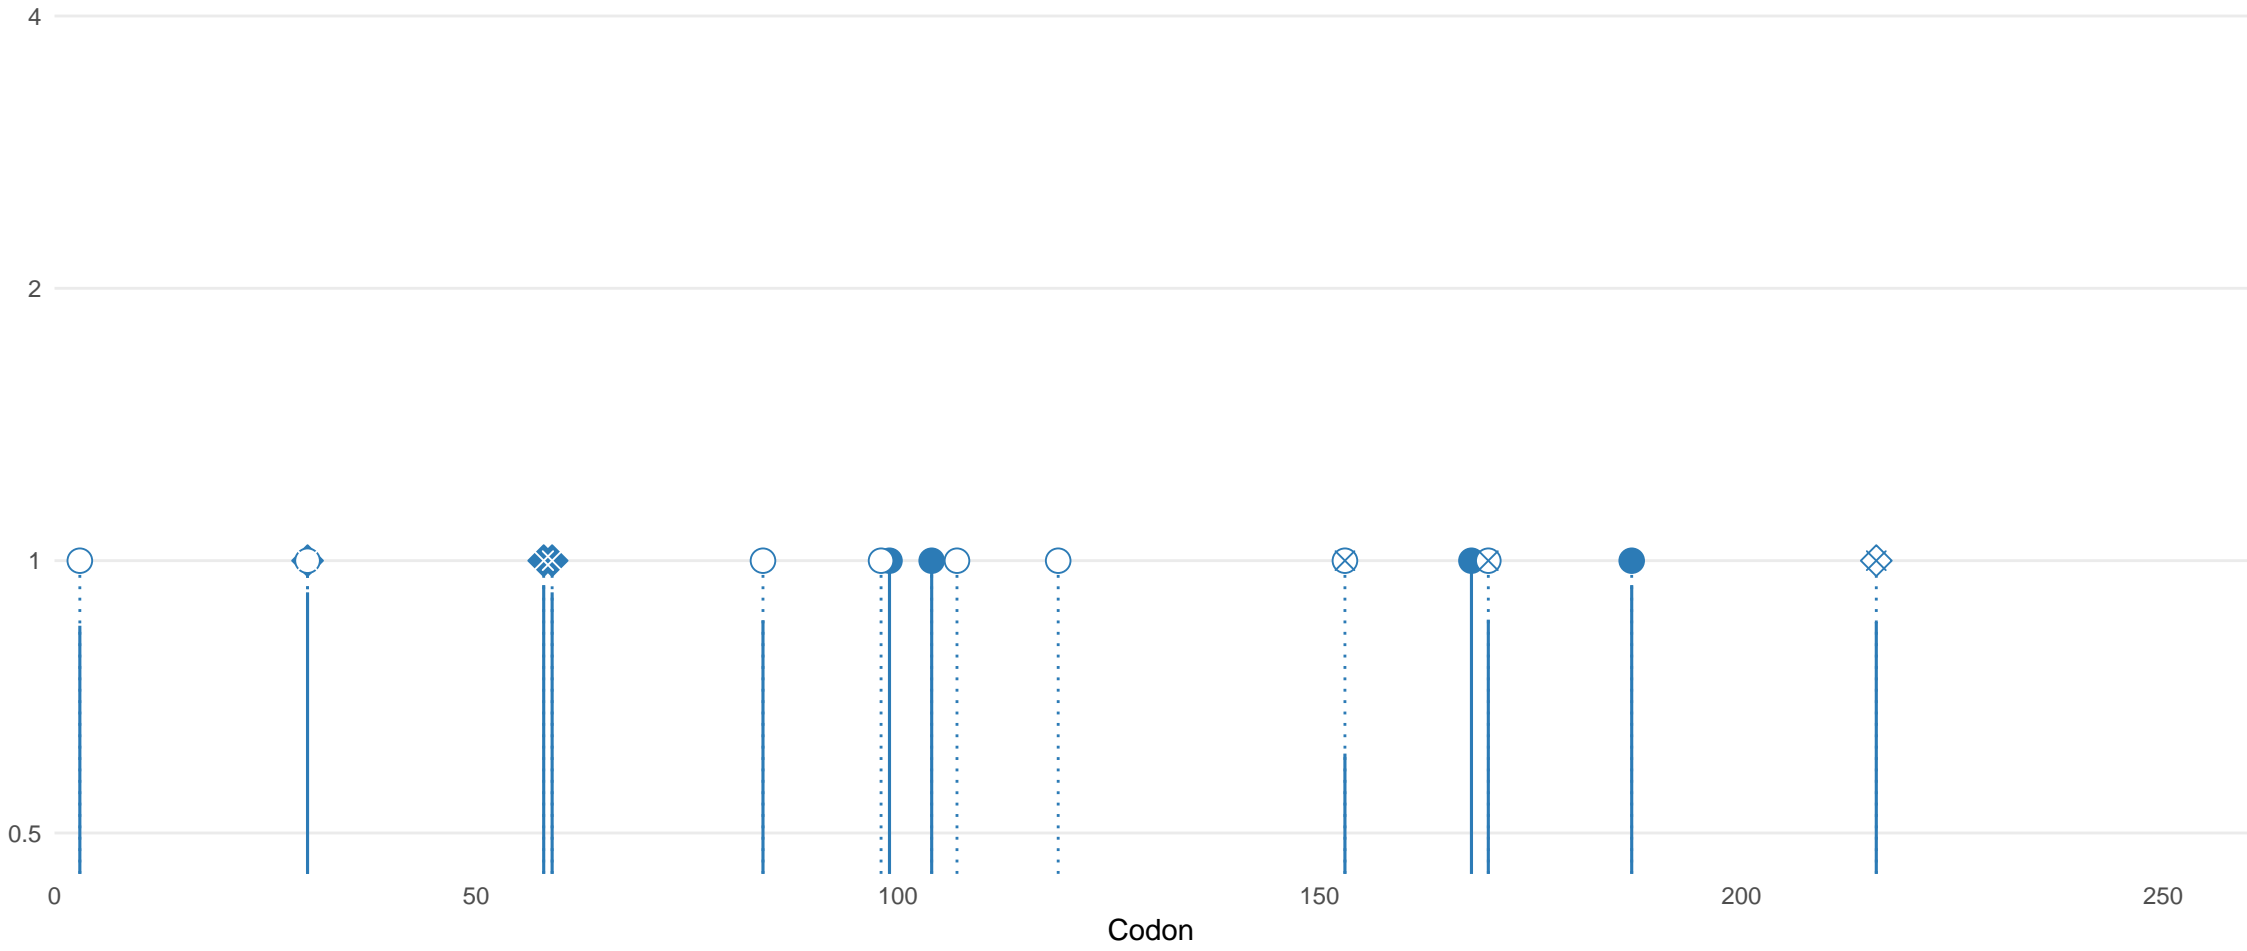

**Monoallelic:** ○ SNV □ MNV ◇ INDEL in frame ⊗ SNV nonsense ⊗ MNV nonsense ⊗ INDEL out of frame  
**Biallelic/Multi-hit:** ● SNV ■ MNV ◆ INDEL in frame ⊗ SNV nonsense ⊗ MNV nonsense ◆ INDEL out of frame  
**Hotspot:** ●

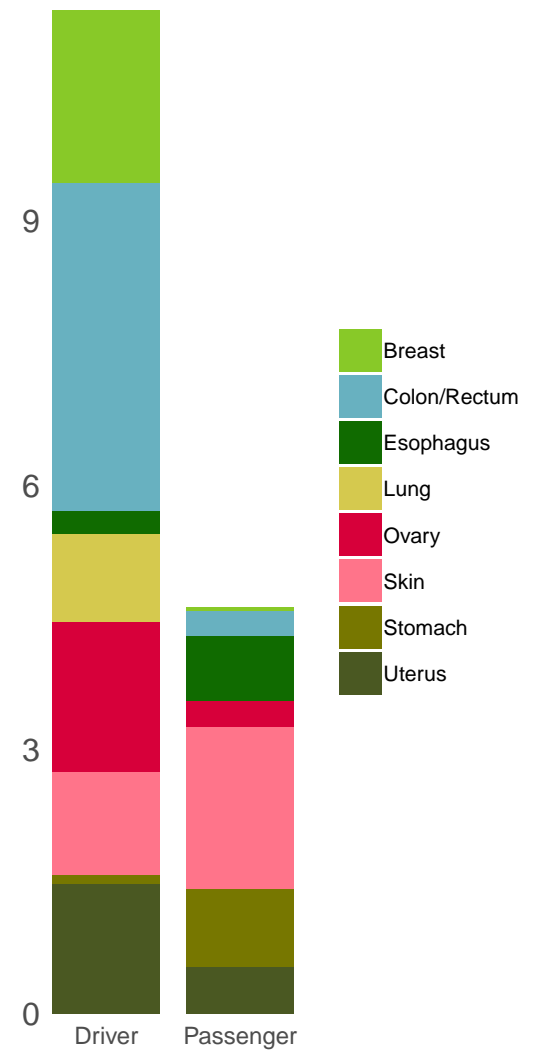

# CDC73 Variants

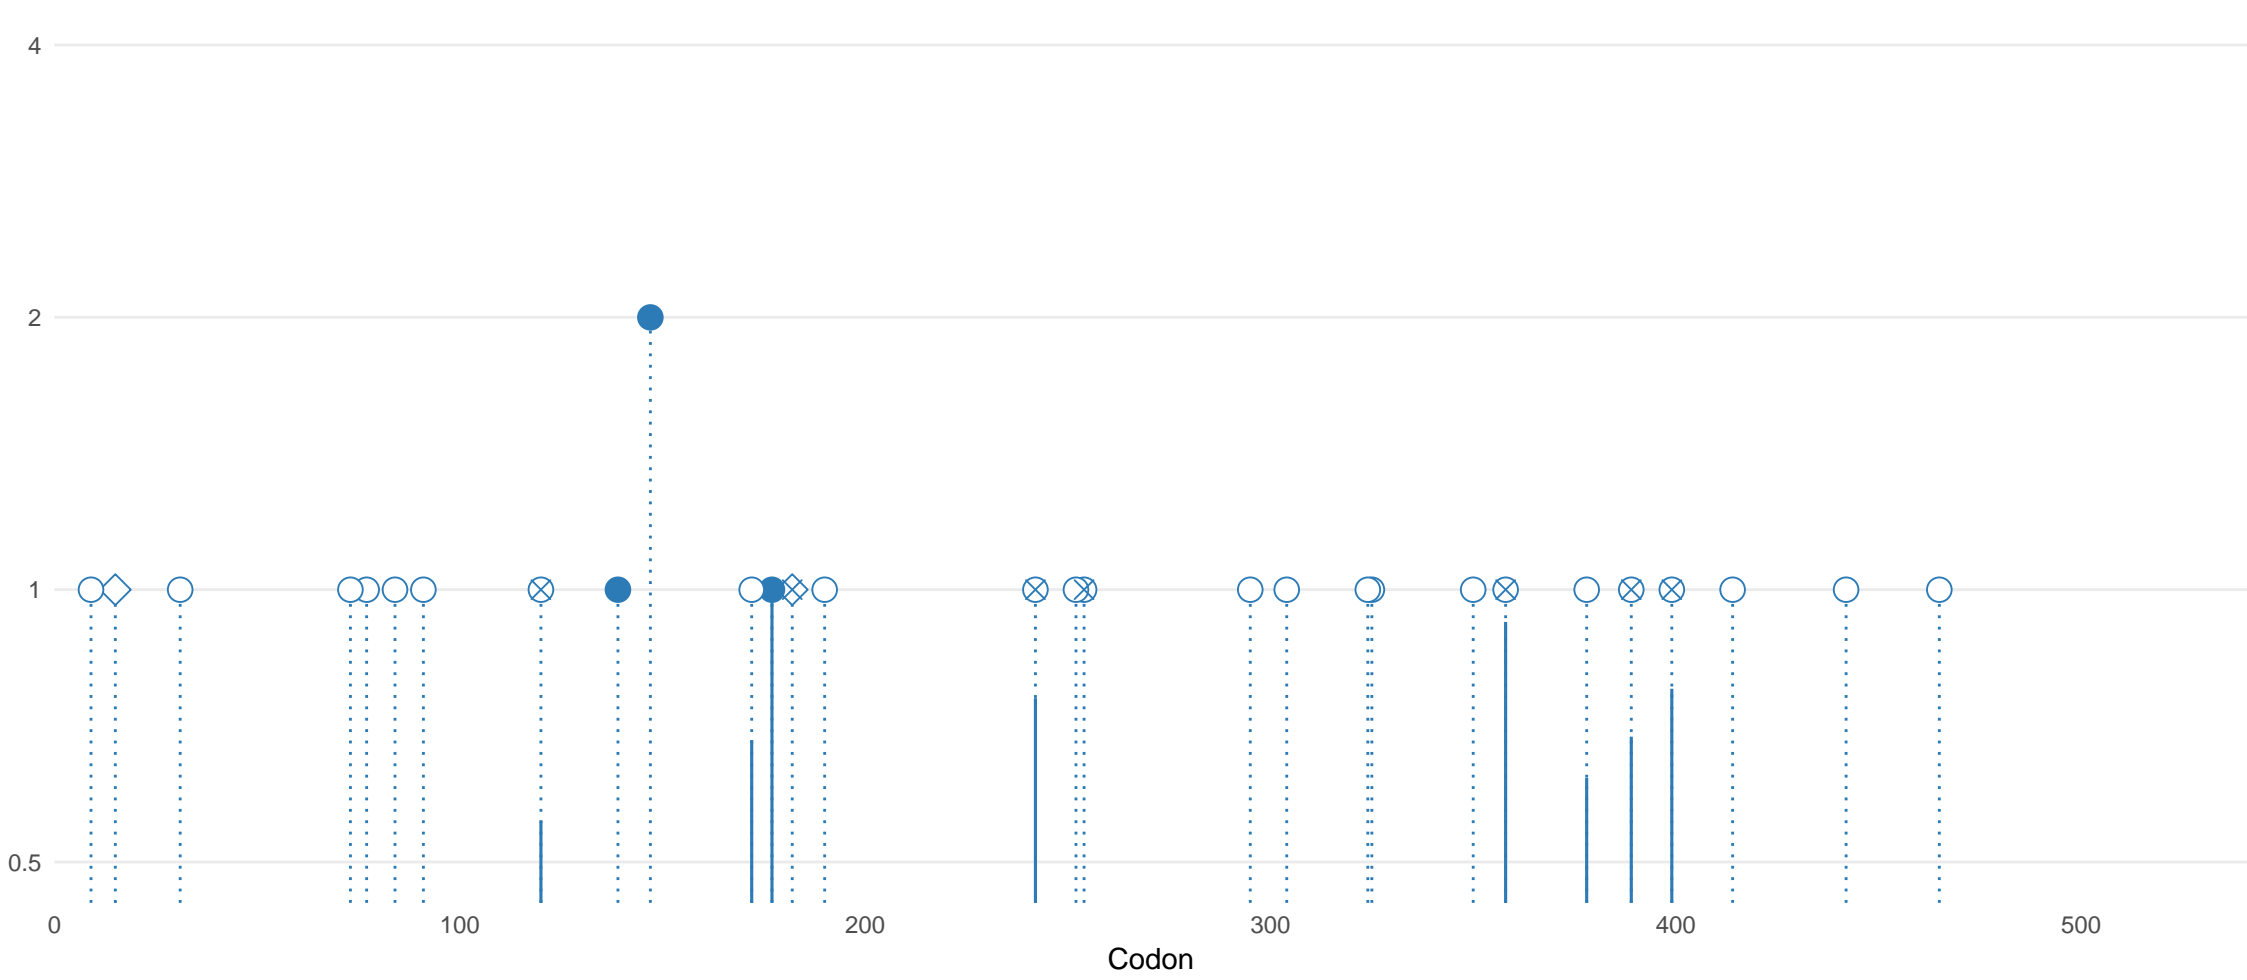

**Monoallelic:** ○ SNV □ MNV ◇ INDEL in frame ⊗ SNV nonsense ⊗ MNV nonsense ⊗ INDEL out of frame  
**Biallelic/Multihit:** ● SNV ■ MNV ◆ INDEL in frame ⊗ SNV nonsense ⊗ MNV nonsense ◆ INDEL out of frame  
**Hotspot:** ●

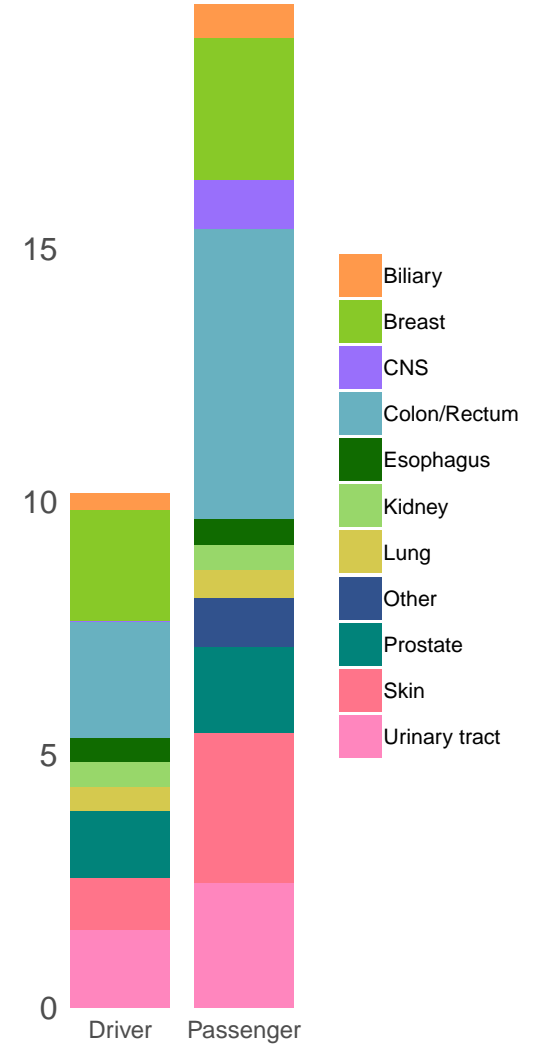

# CDH1 Variants

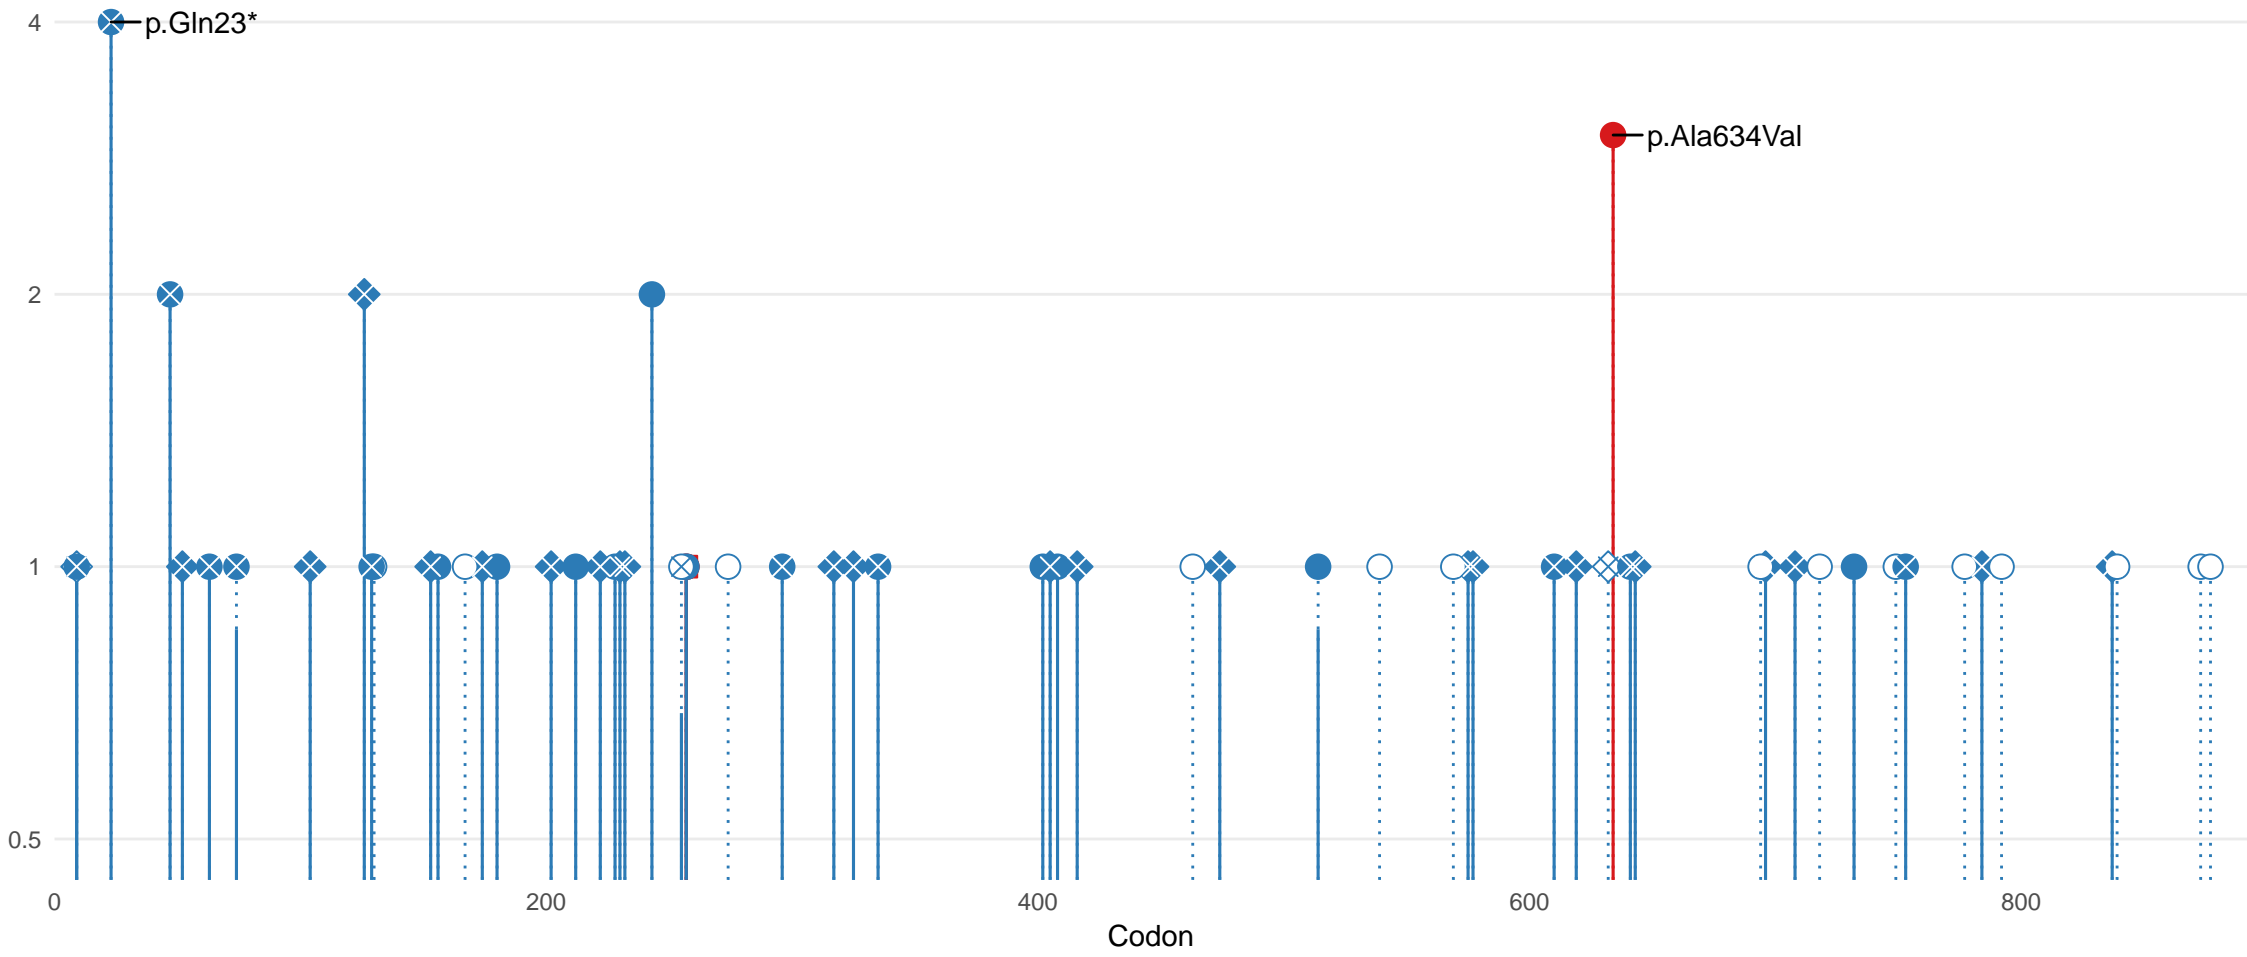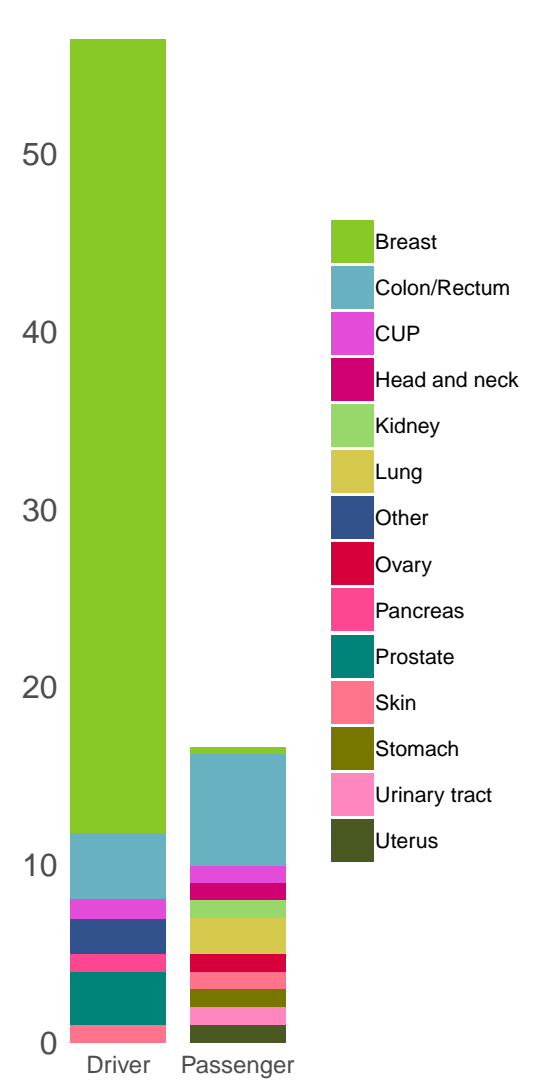



# CDK12 Variants

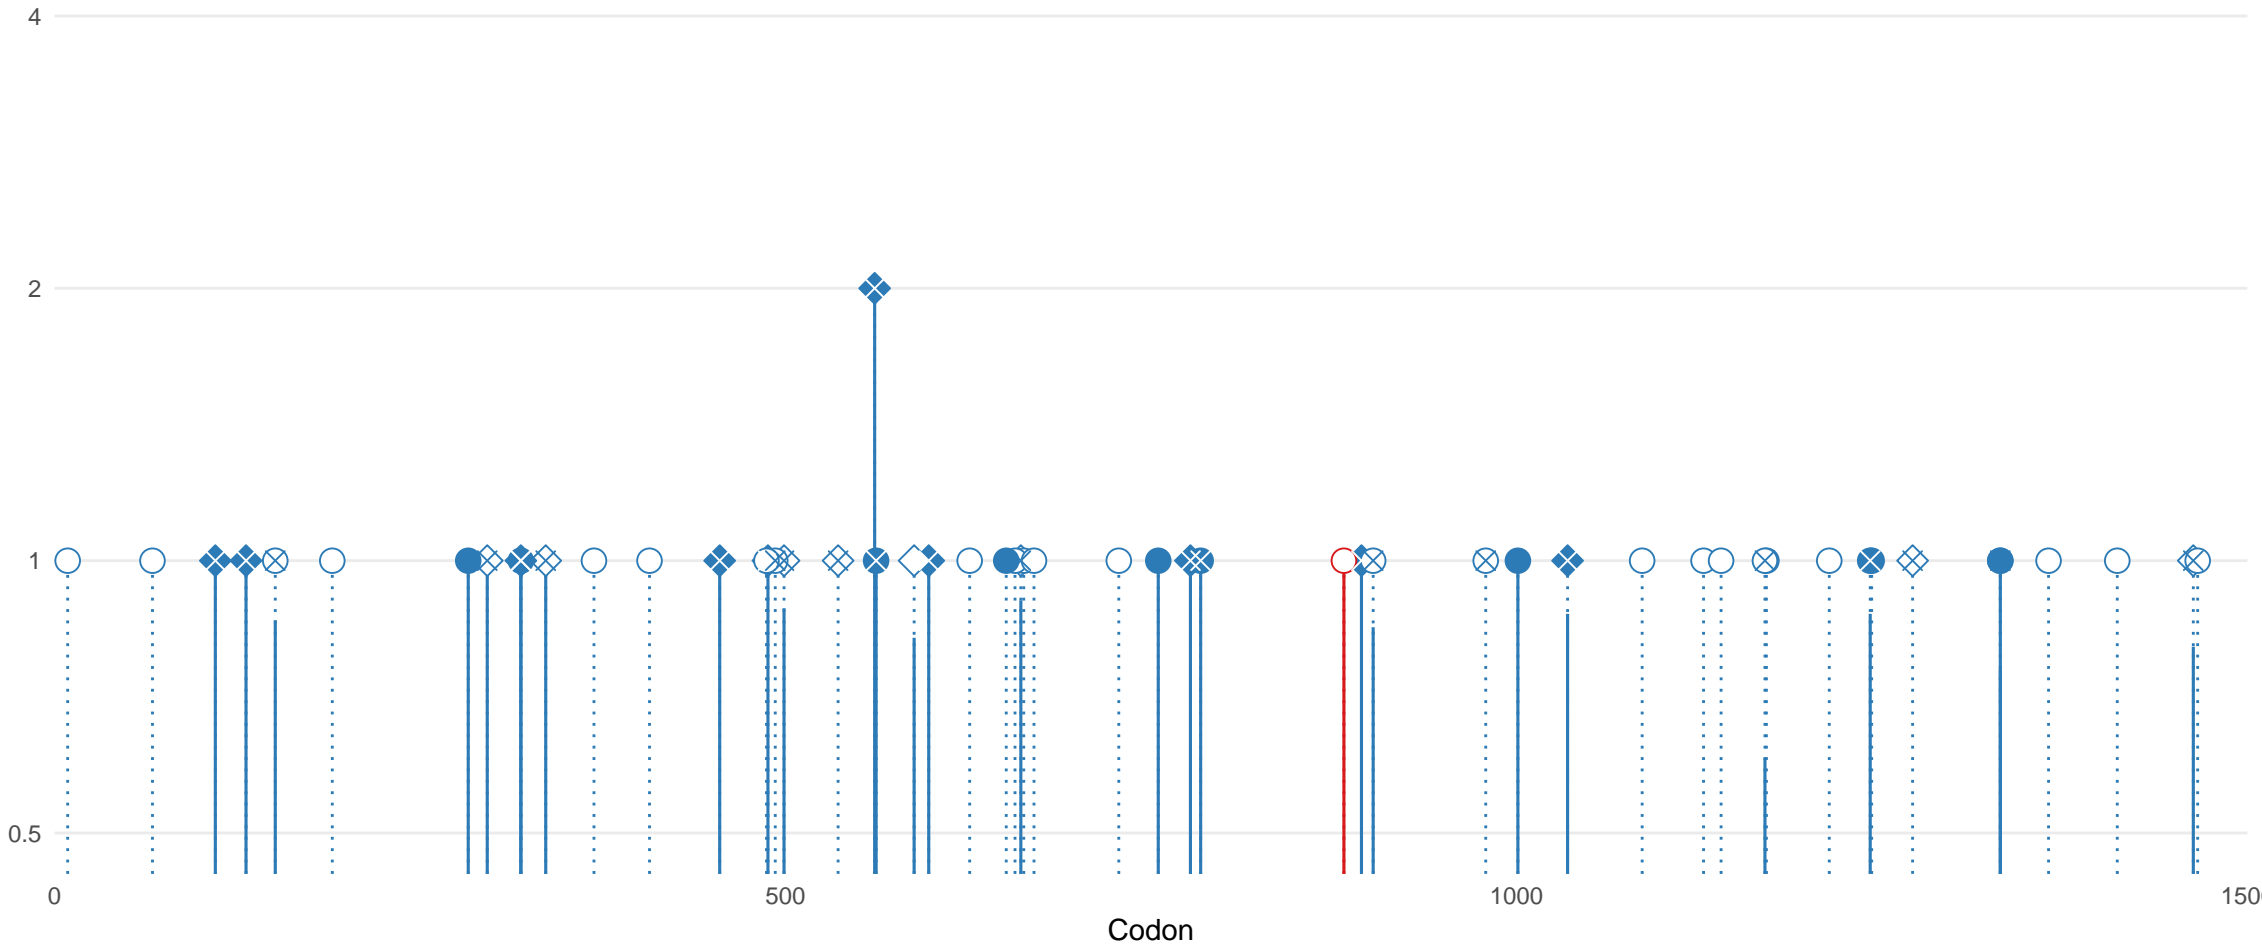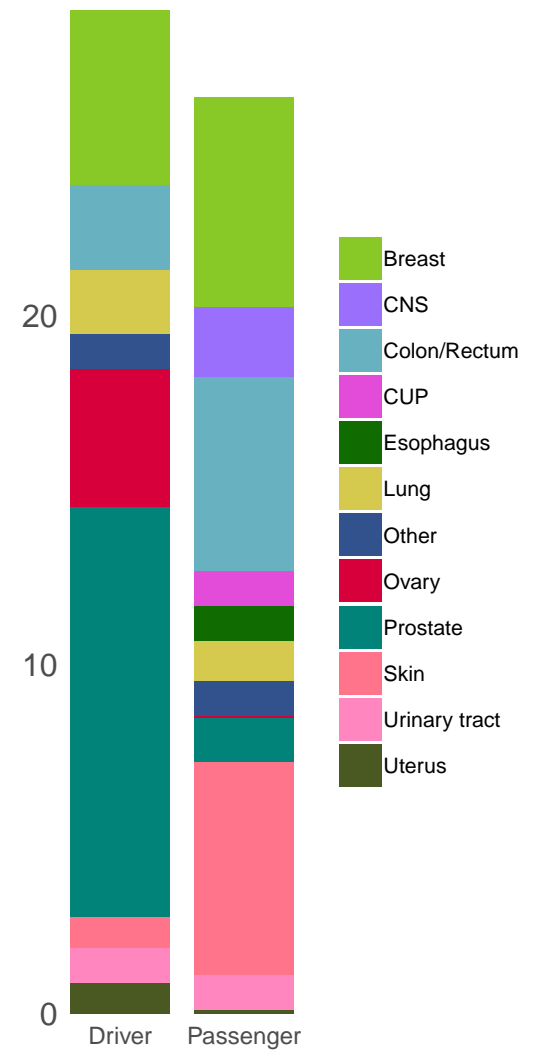

# CDKN1A Variants

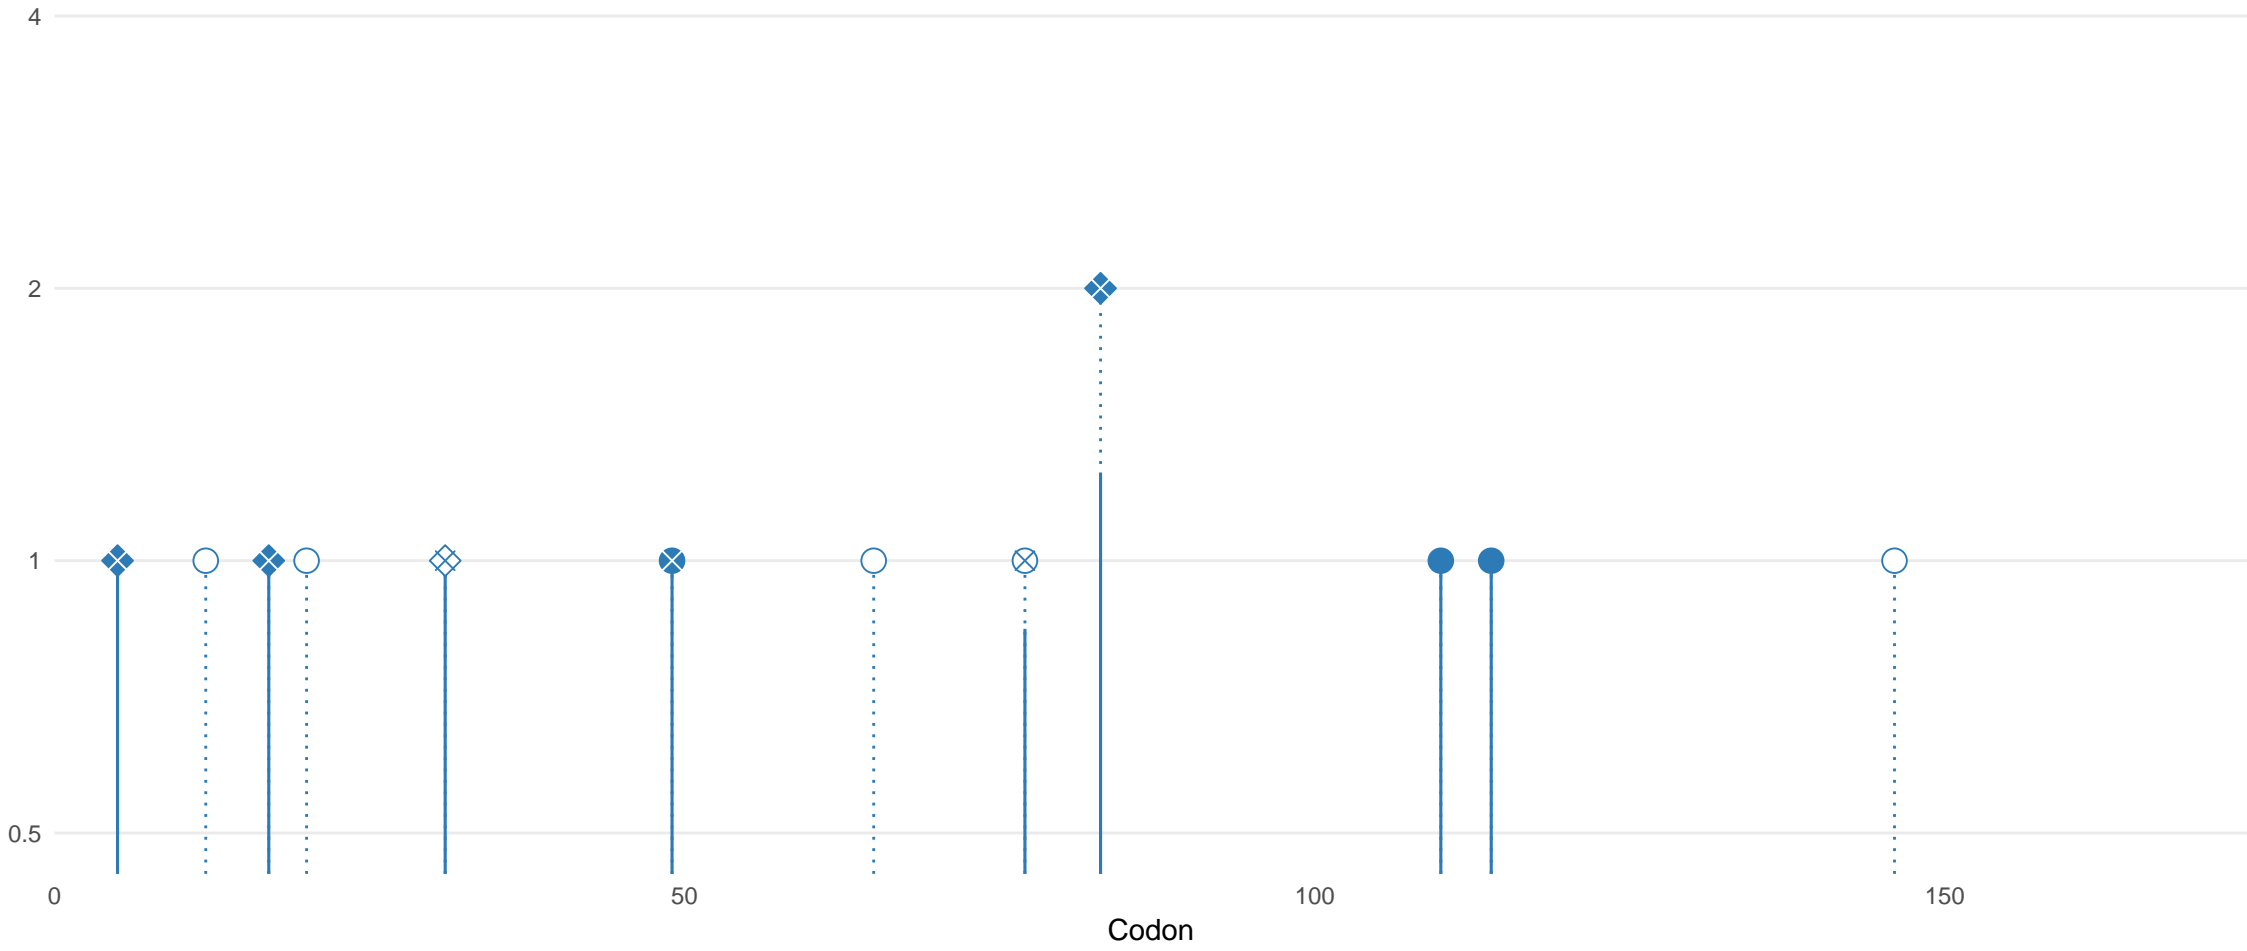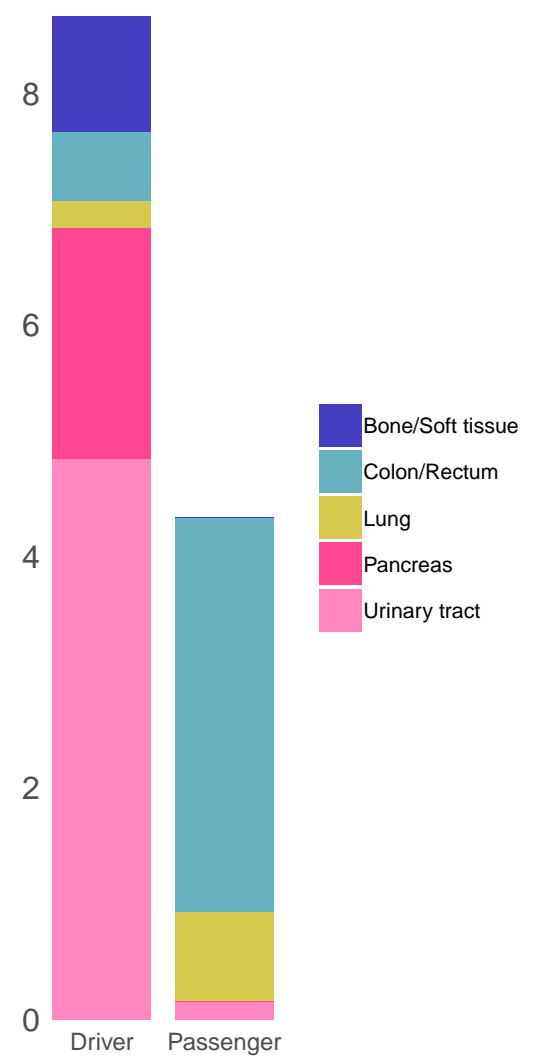

Monoallelic: ○ SNV □ MNV ◇ INDEL in frame ⊗ SNV nonsense ⊗ MNV nonsense ⊗ INDEL out of frame  
 Biallelic/Multihit: ● SNV ■ MNV ◆ INDEL in frame ⊗ SNV nonsense ⊗ MNV nonsense ◆ INDEL out of frame  
 Hotspot: ●

# CDKN1B Variants

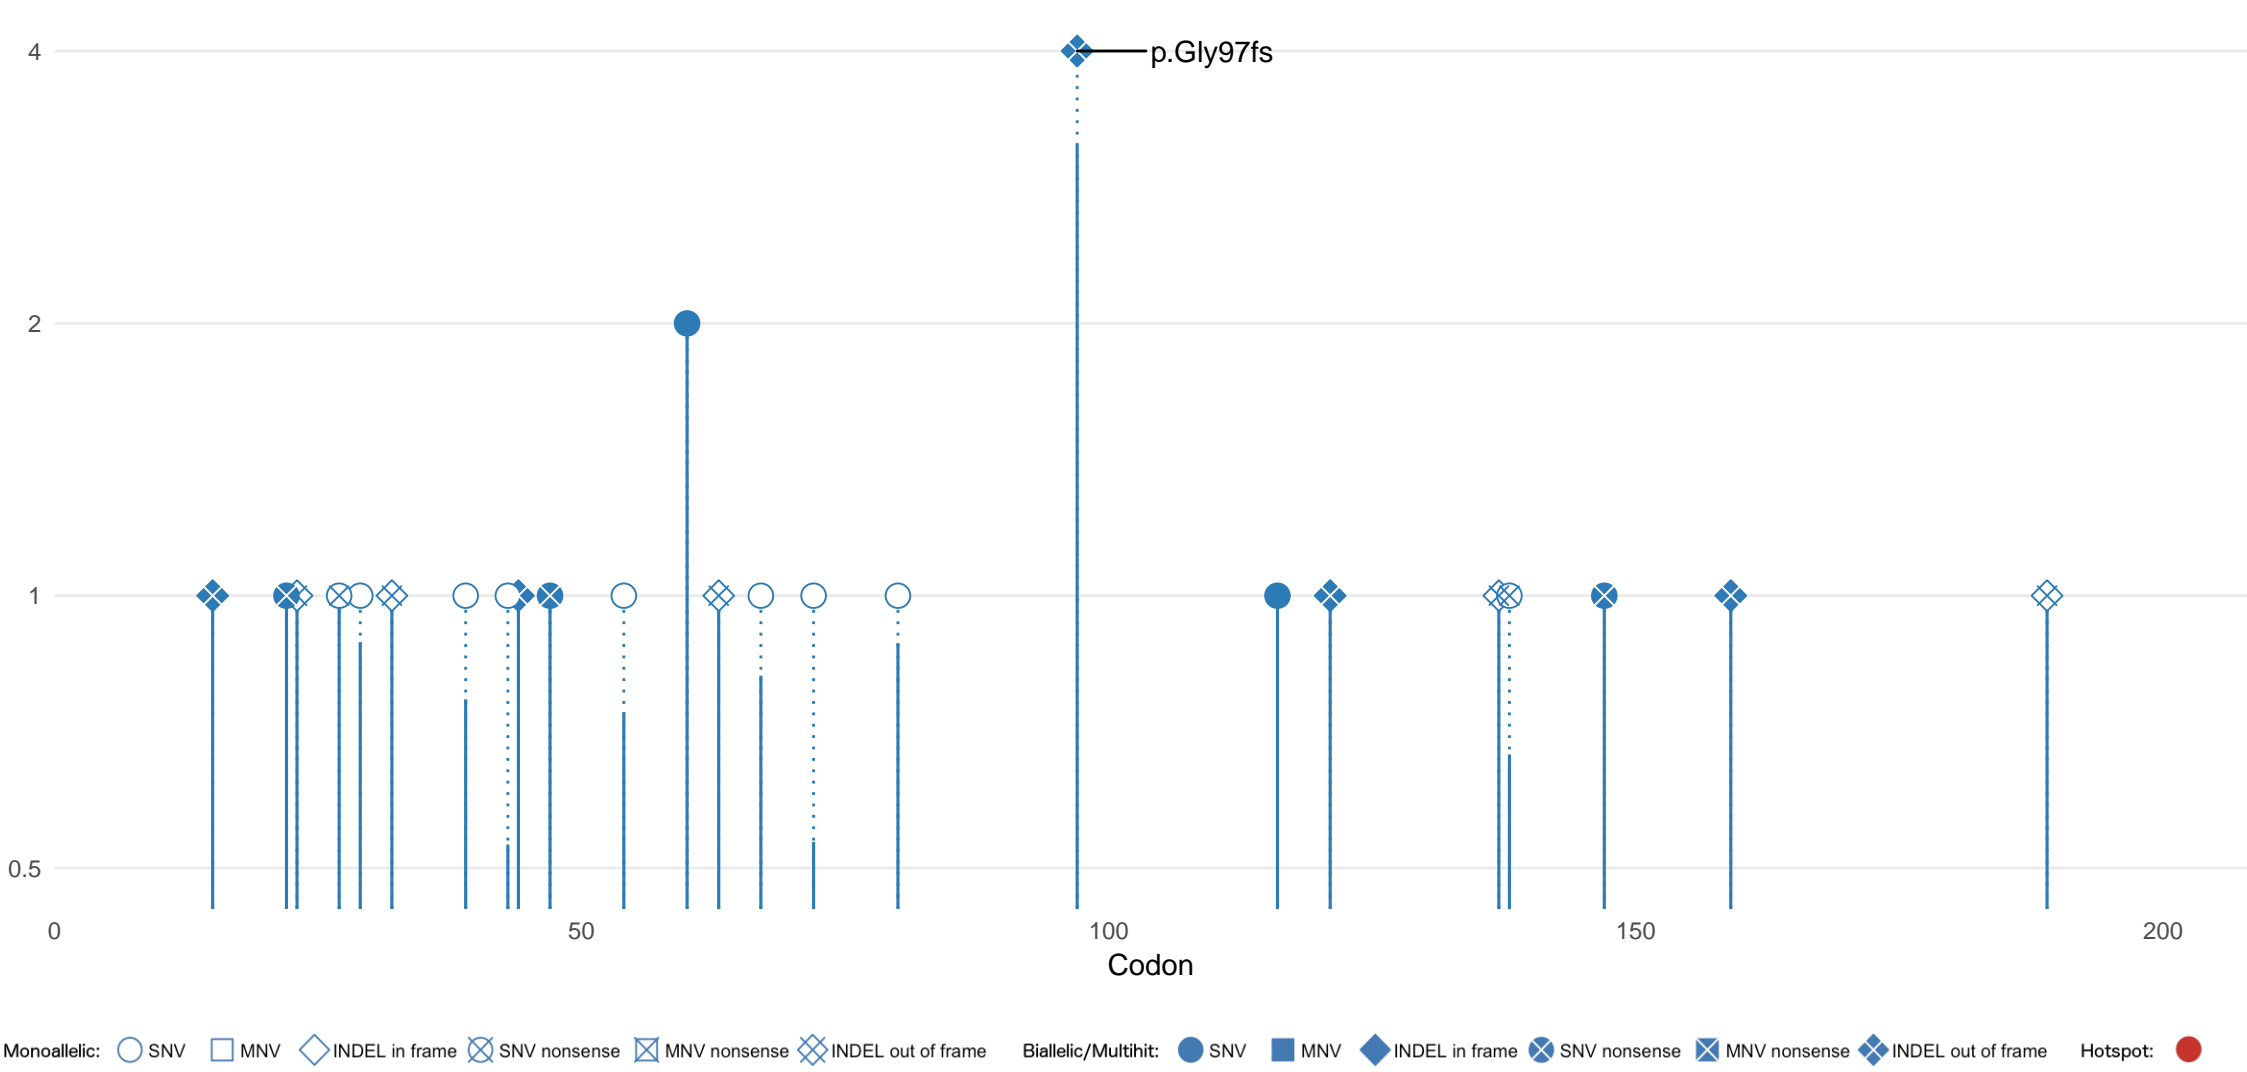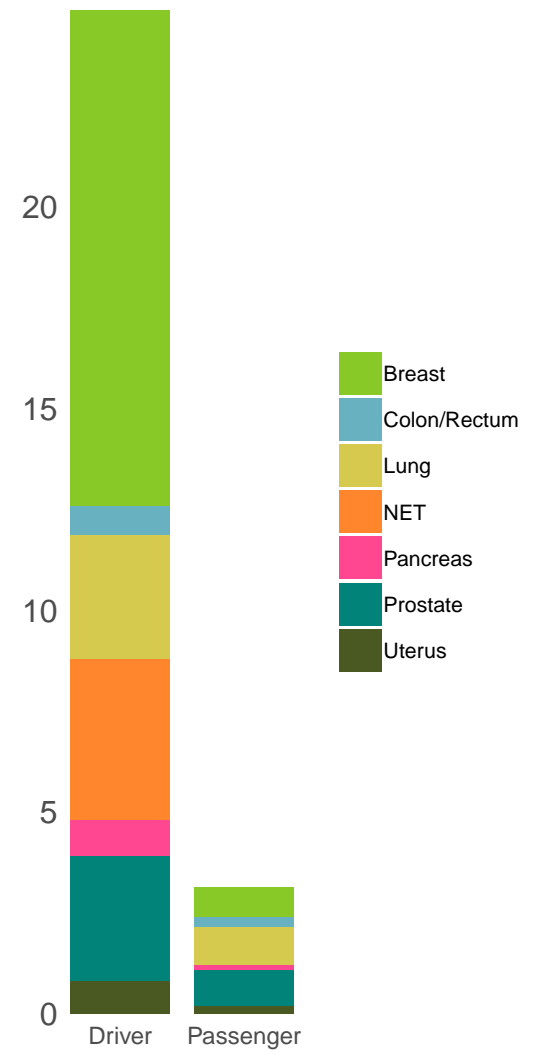

# CDKN2A Variants

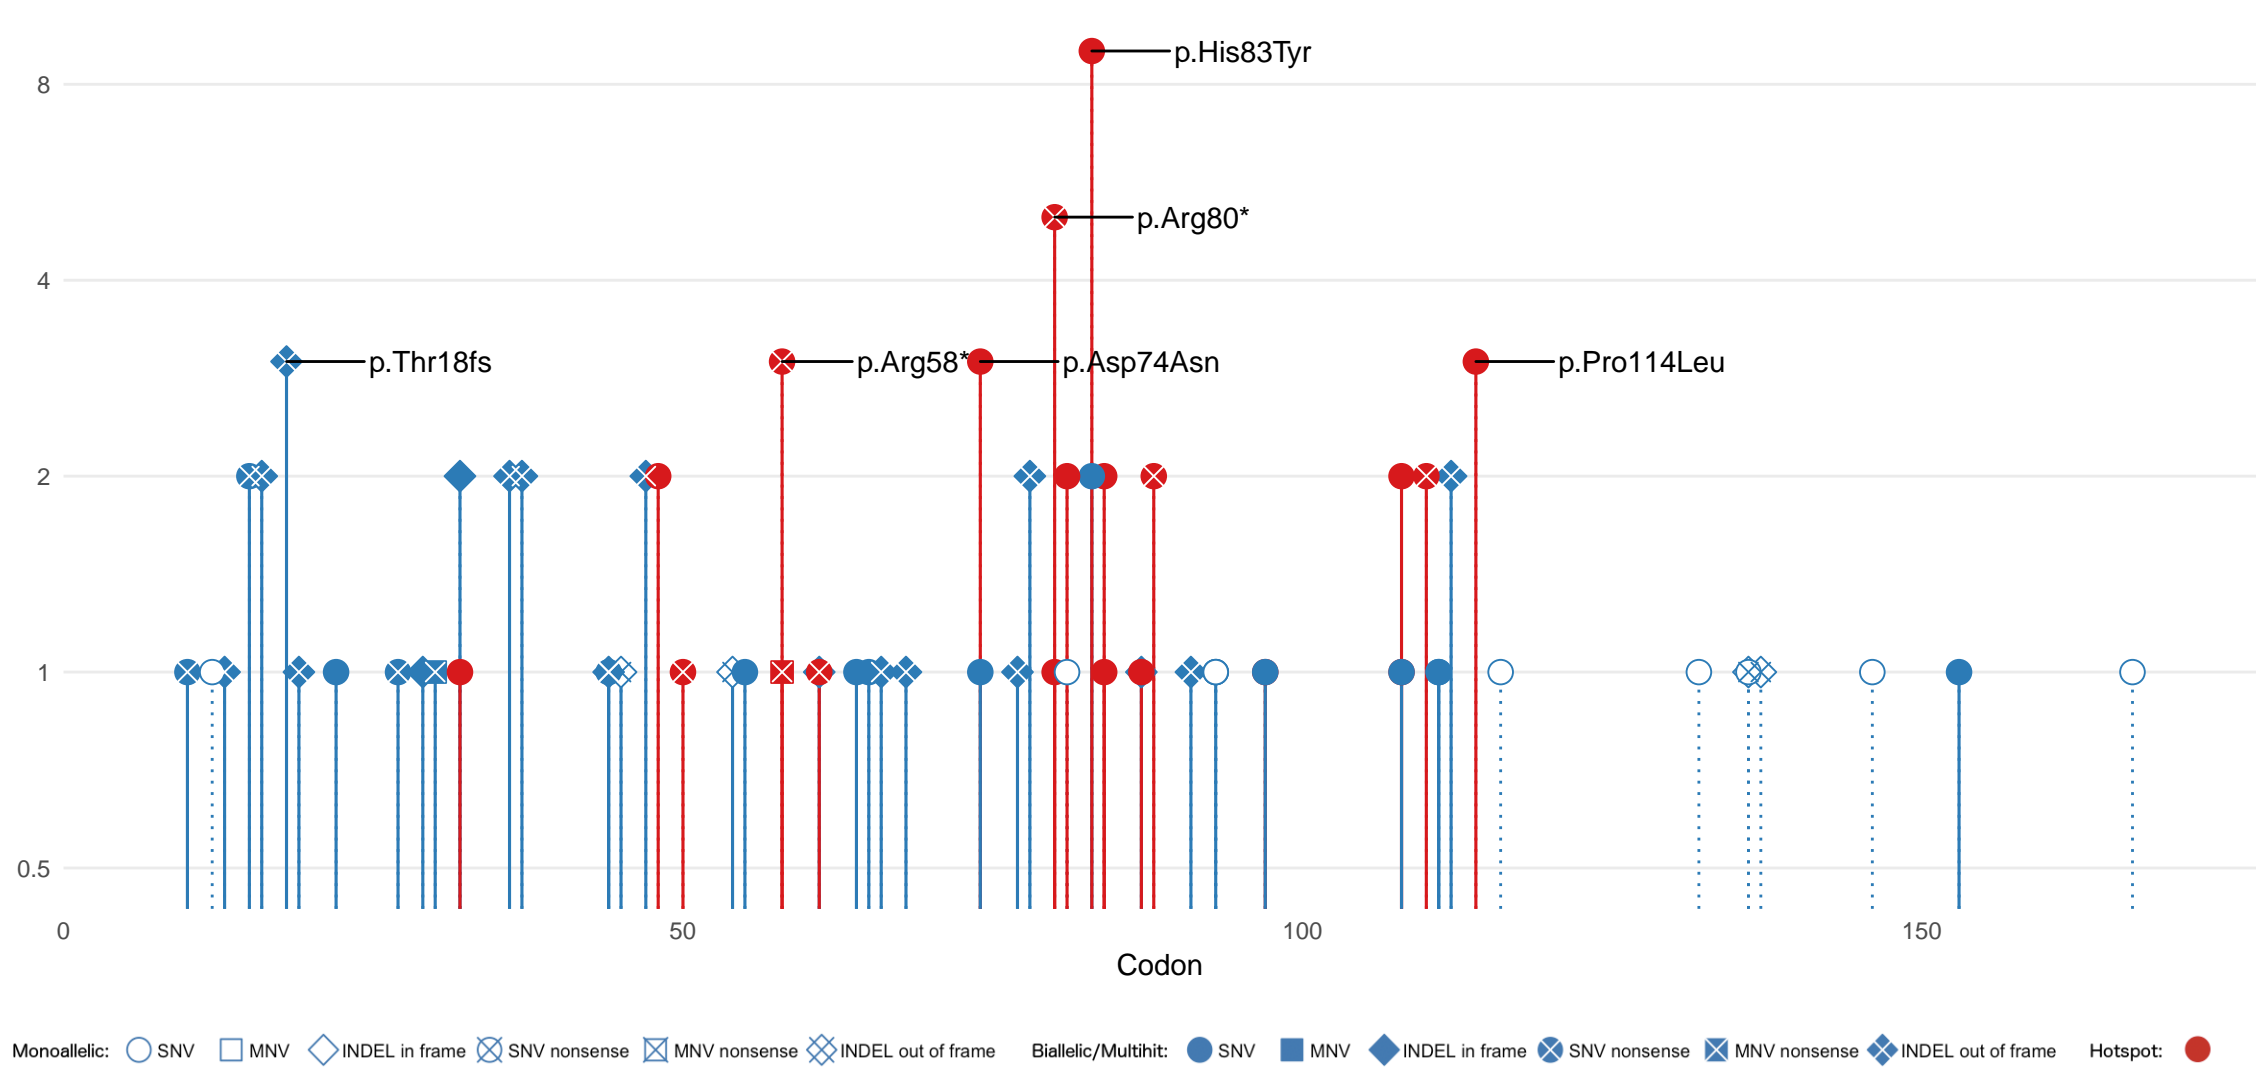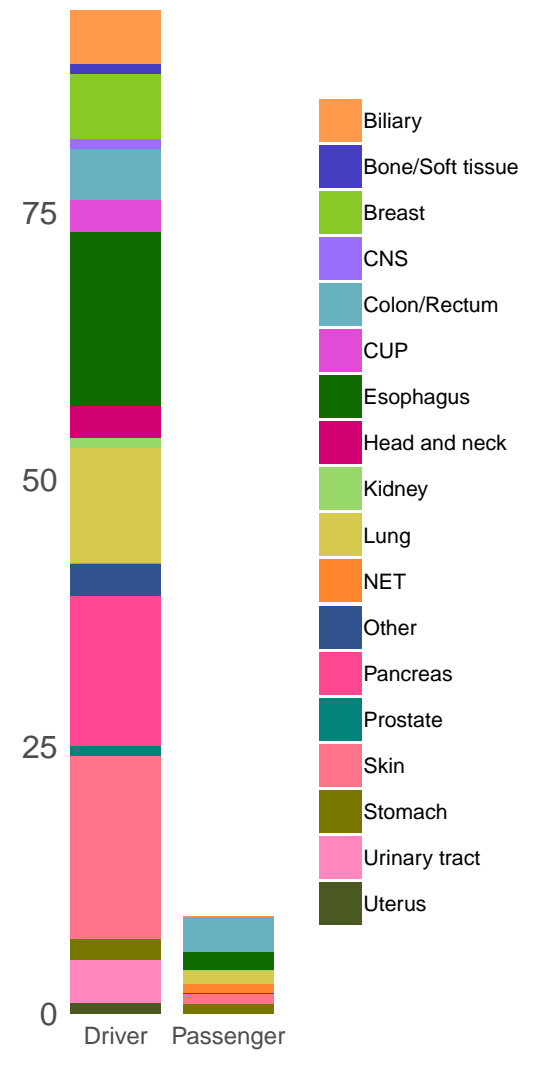

# CDKN2C Variants

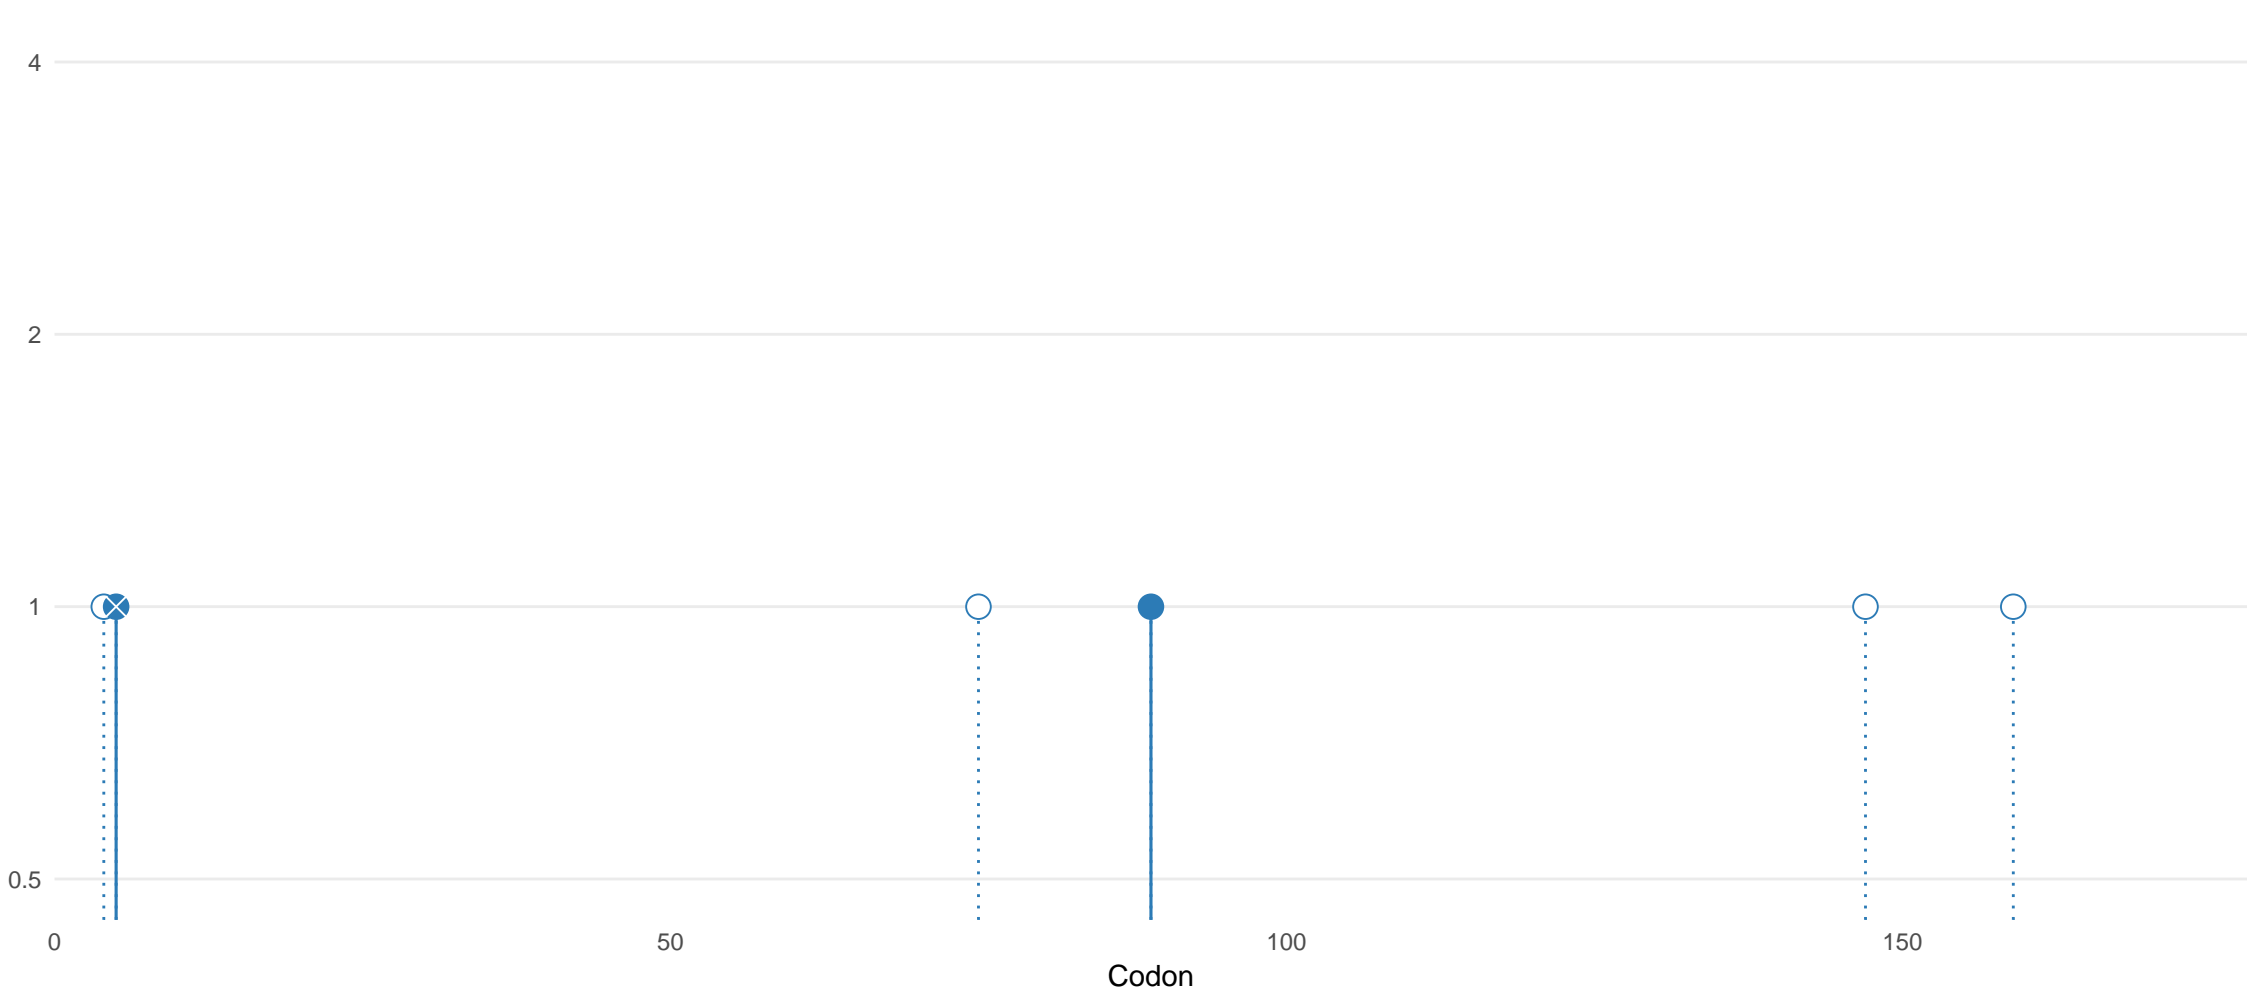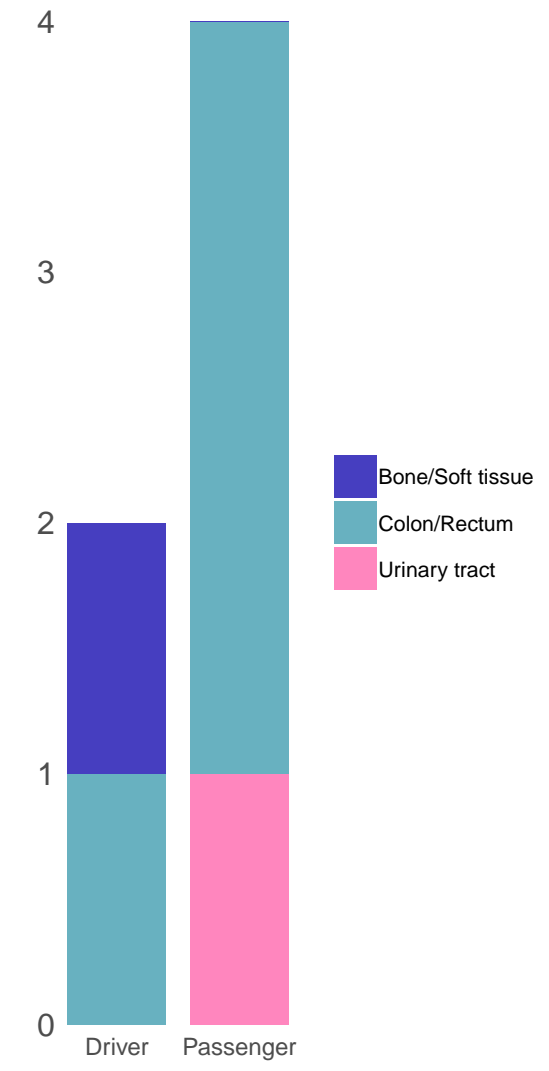

**Monoallelic:** ○ SNV □ MNV ◇ INDEL in frame ⊗ SNV nonsense ⊗ MNV nonsense ⊗ INDEL out of frame  
**Biallelic/Multihit:** ● SNV ■ MNV ◆ INDEL in frame ⊗ SNV nonsense ⊗ MNV nonsense ◆ INDEL out of frame  
**Hotspot:** ●

# CEBPA Variants

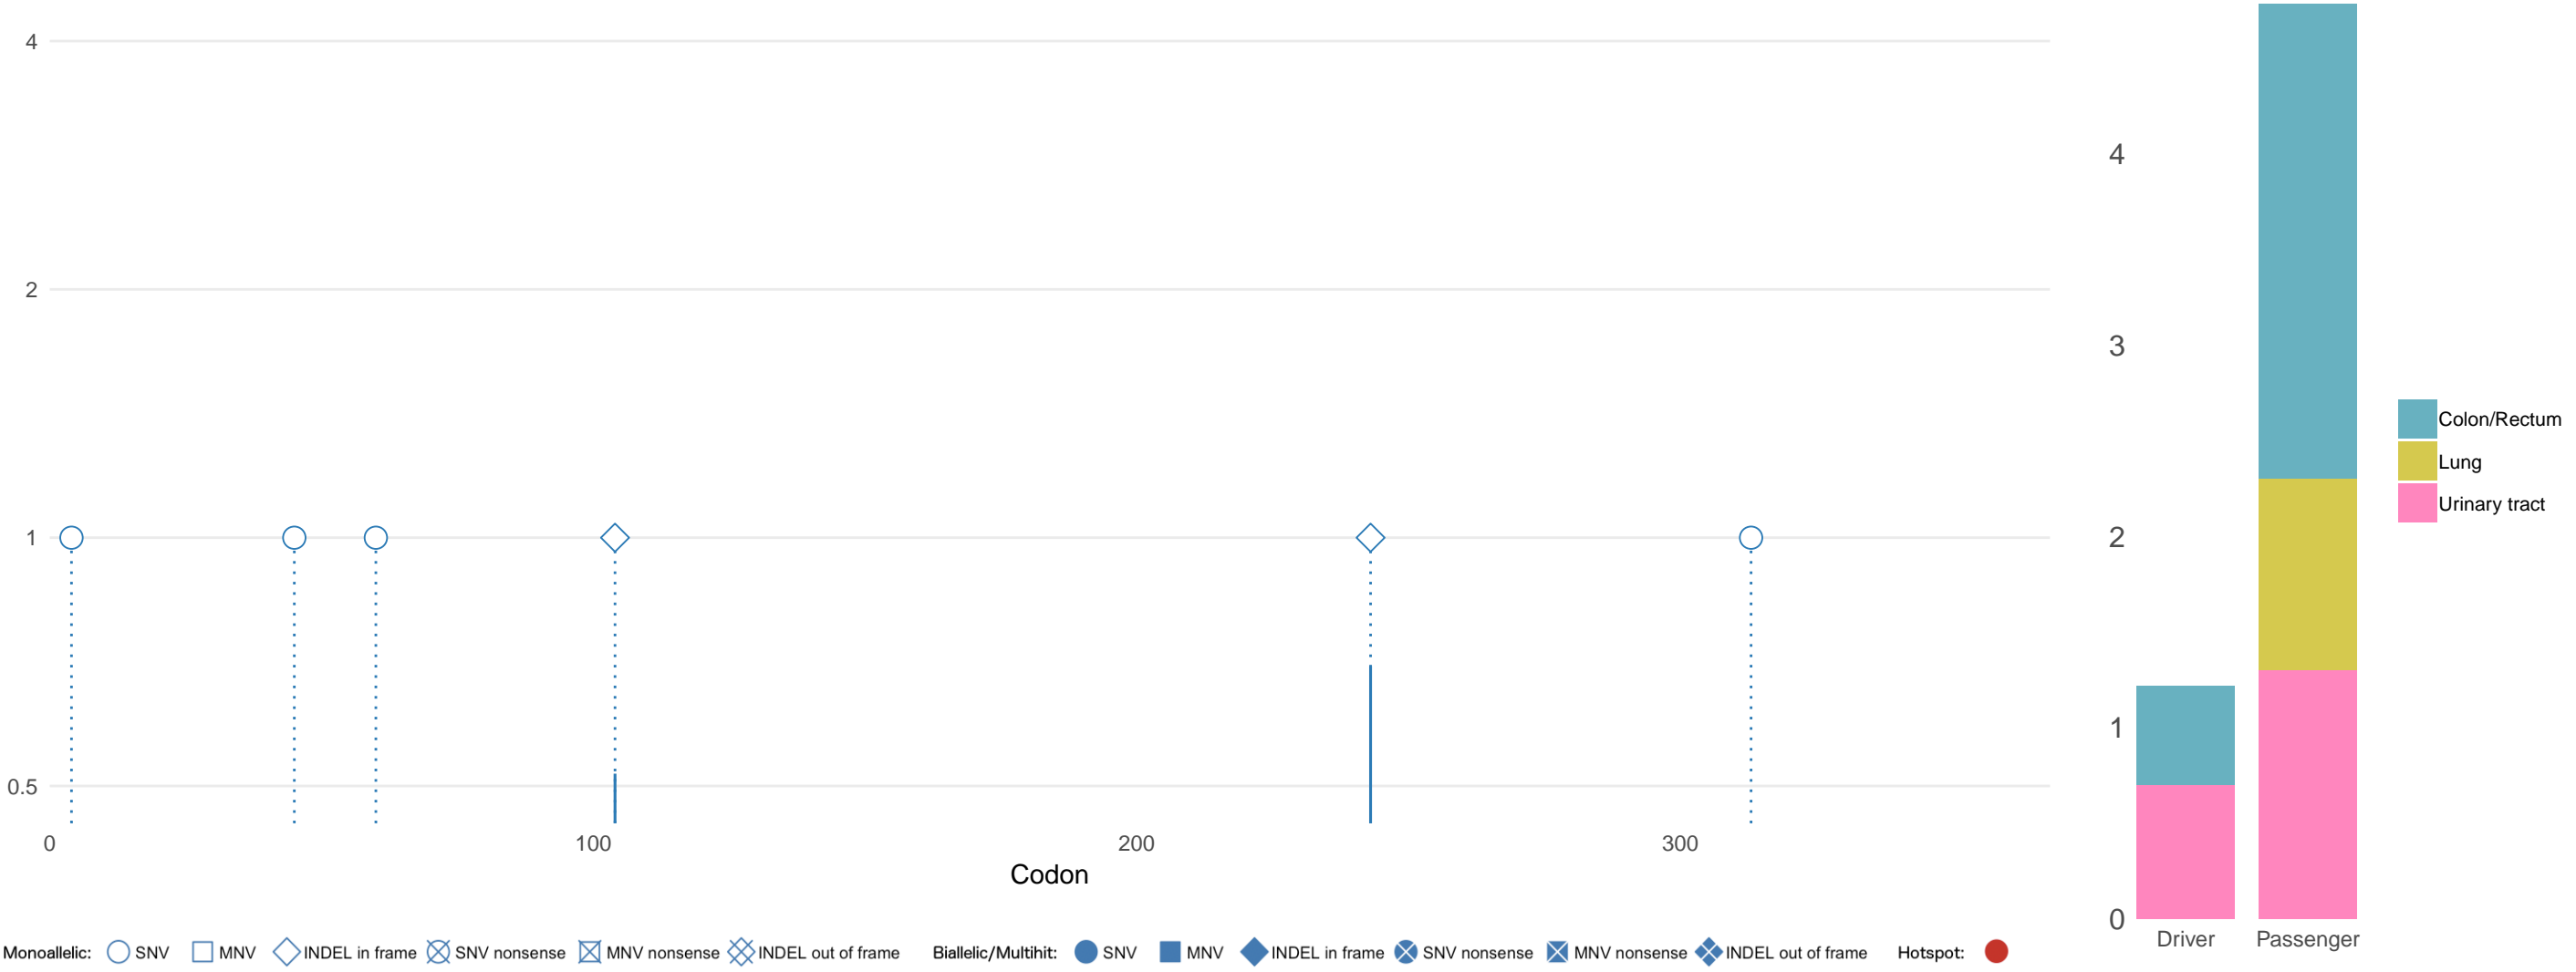

# CNOT3 Variants

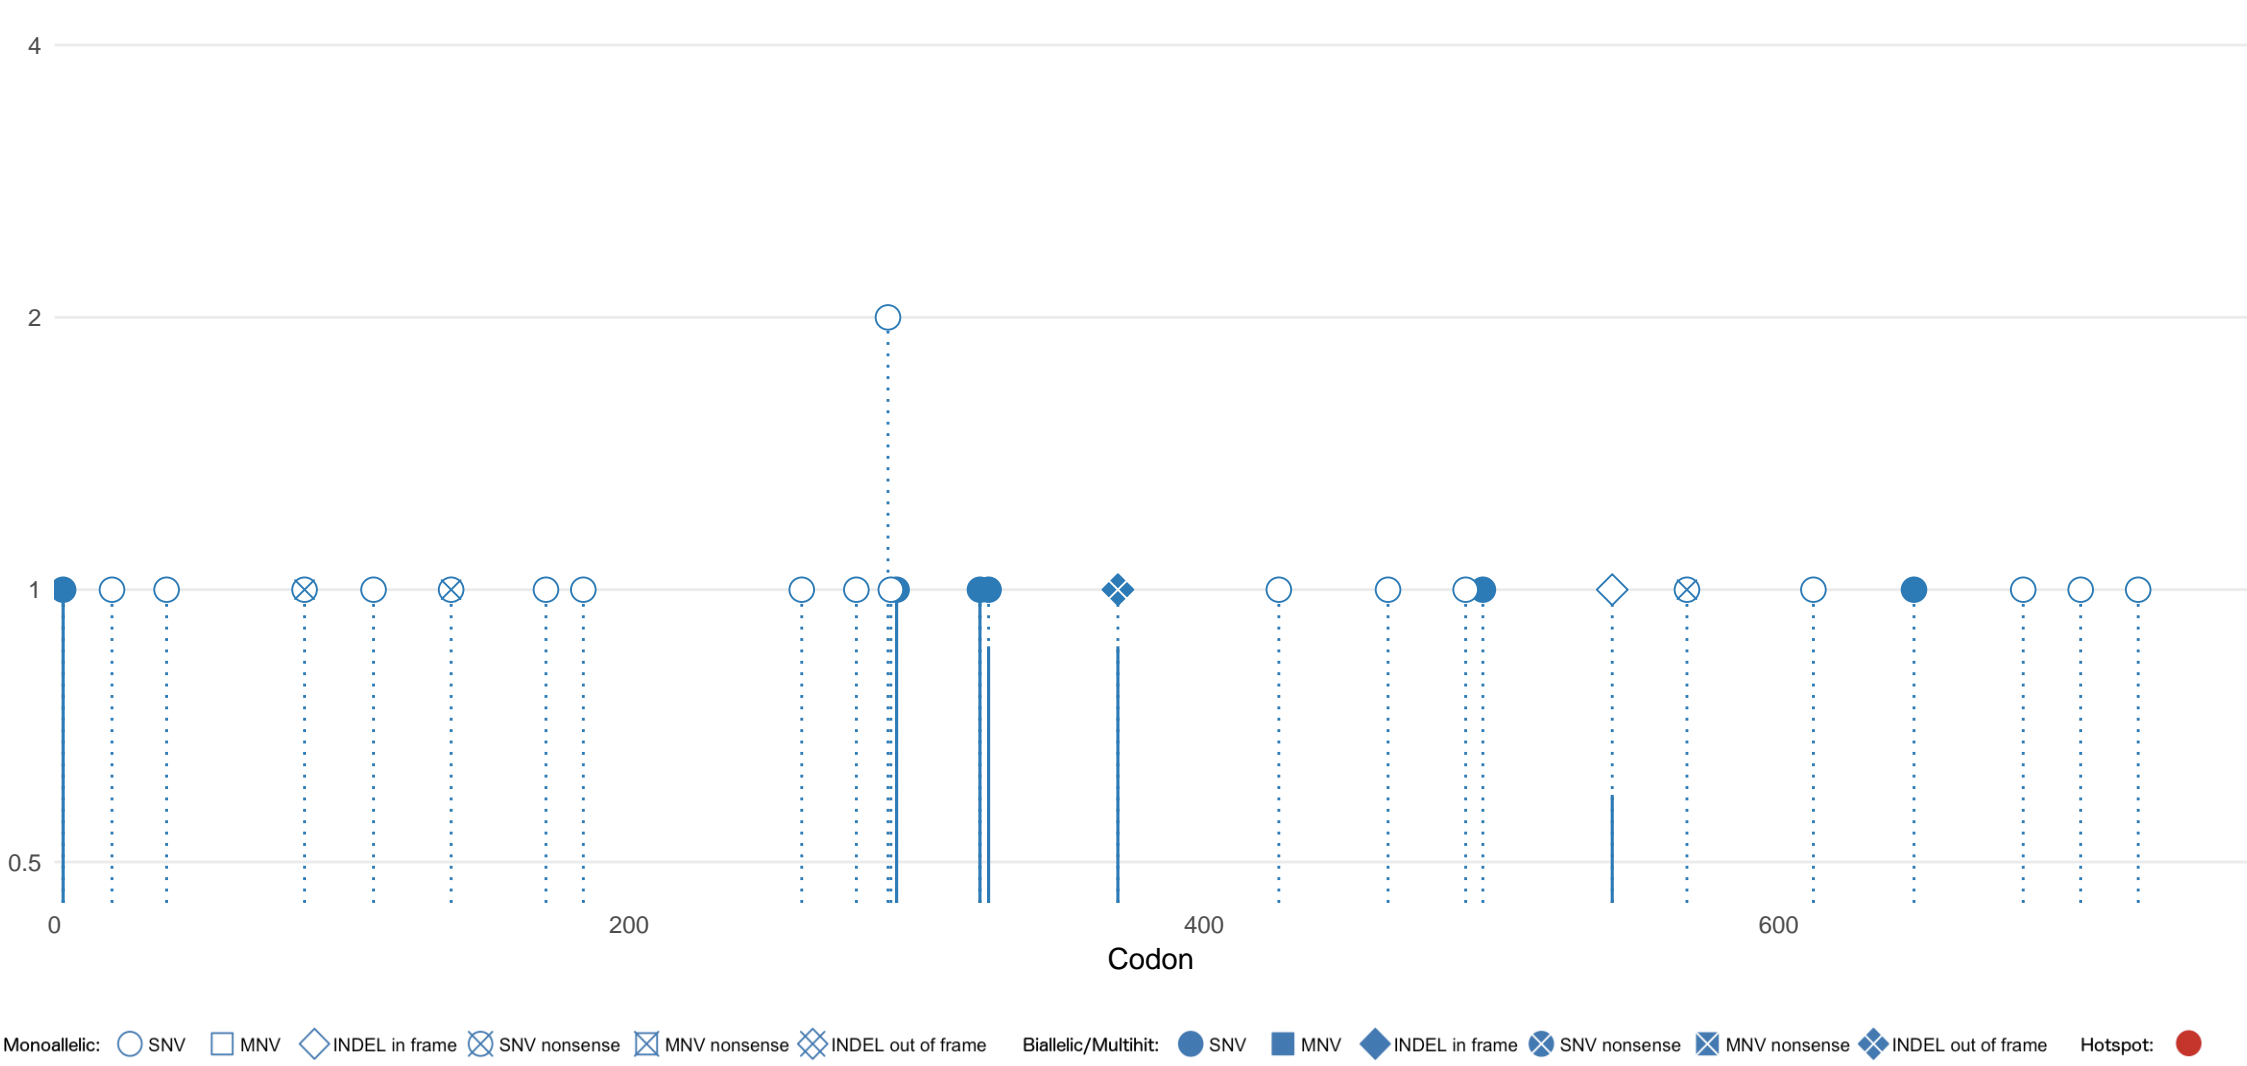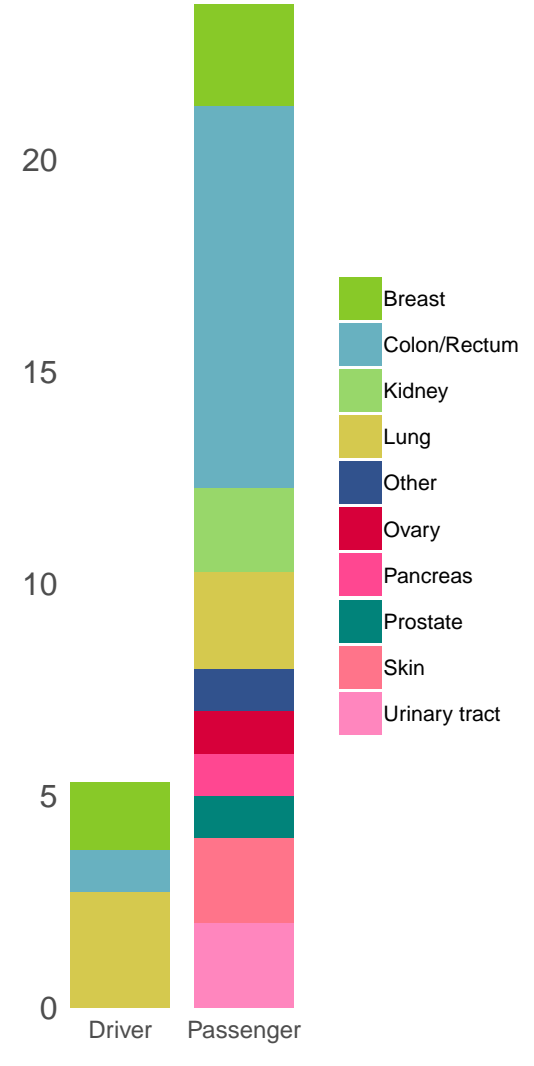

# CREBBP Variants

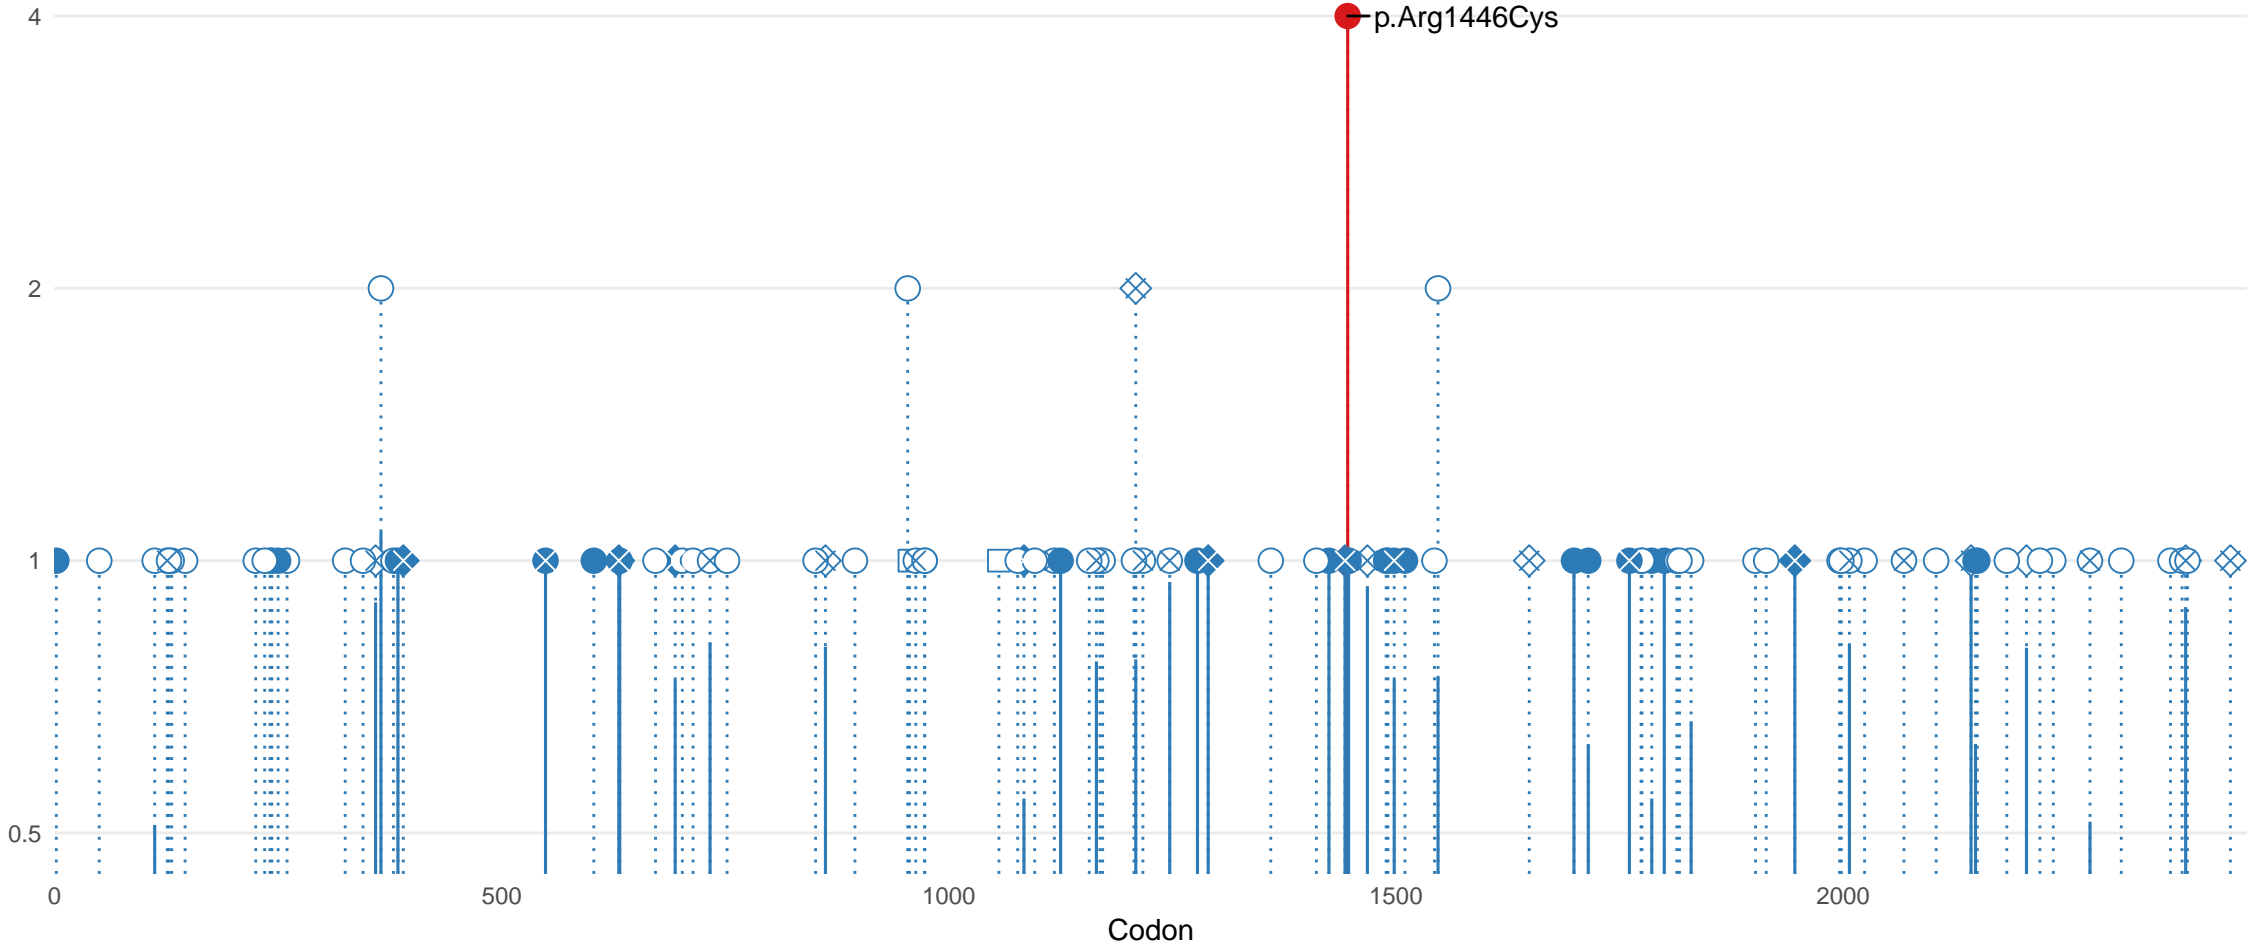

**Monoallelic:** ○ SNV □ MNV ◇ INDEL in frame ⊗ SNV nonsense ⊗ MNV nonsense ⊗ INDEL out of frame  
**Biallelic/Multihit:** ● SNV ■ MNV ◆ INDEL in frame ⊗ SNV nonsense ⊗ MNV nonsense ◆ INDEL out of frame  
**Hotspot:** ●

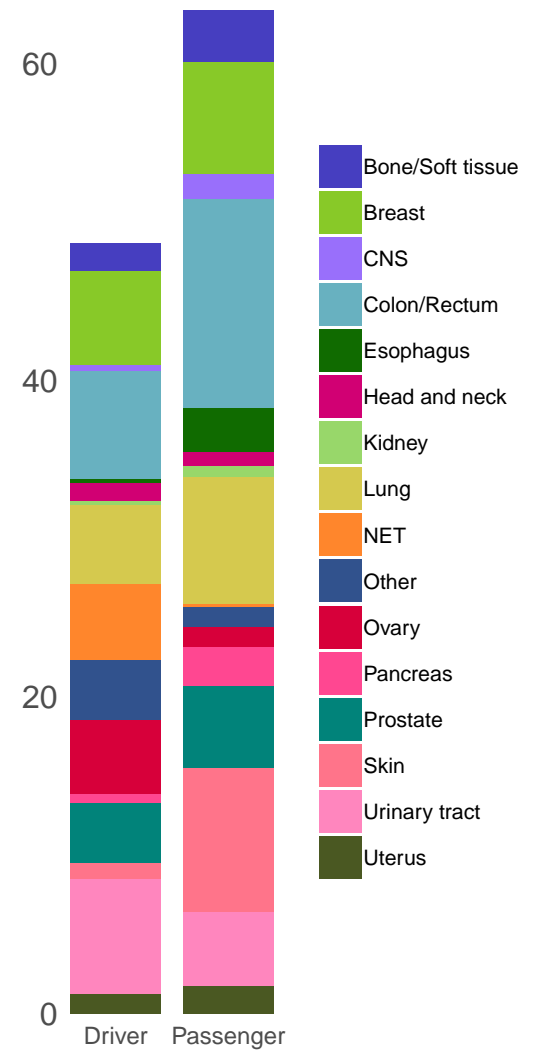



# CTCF Variants

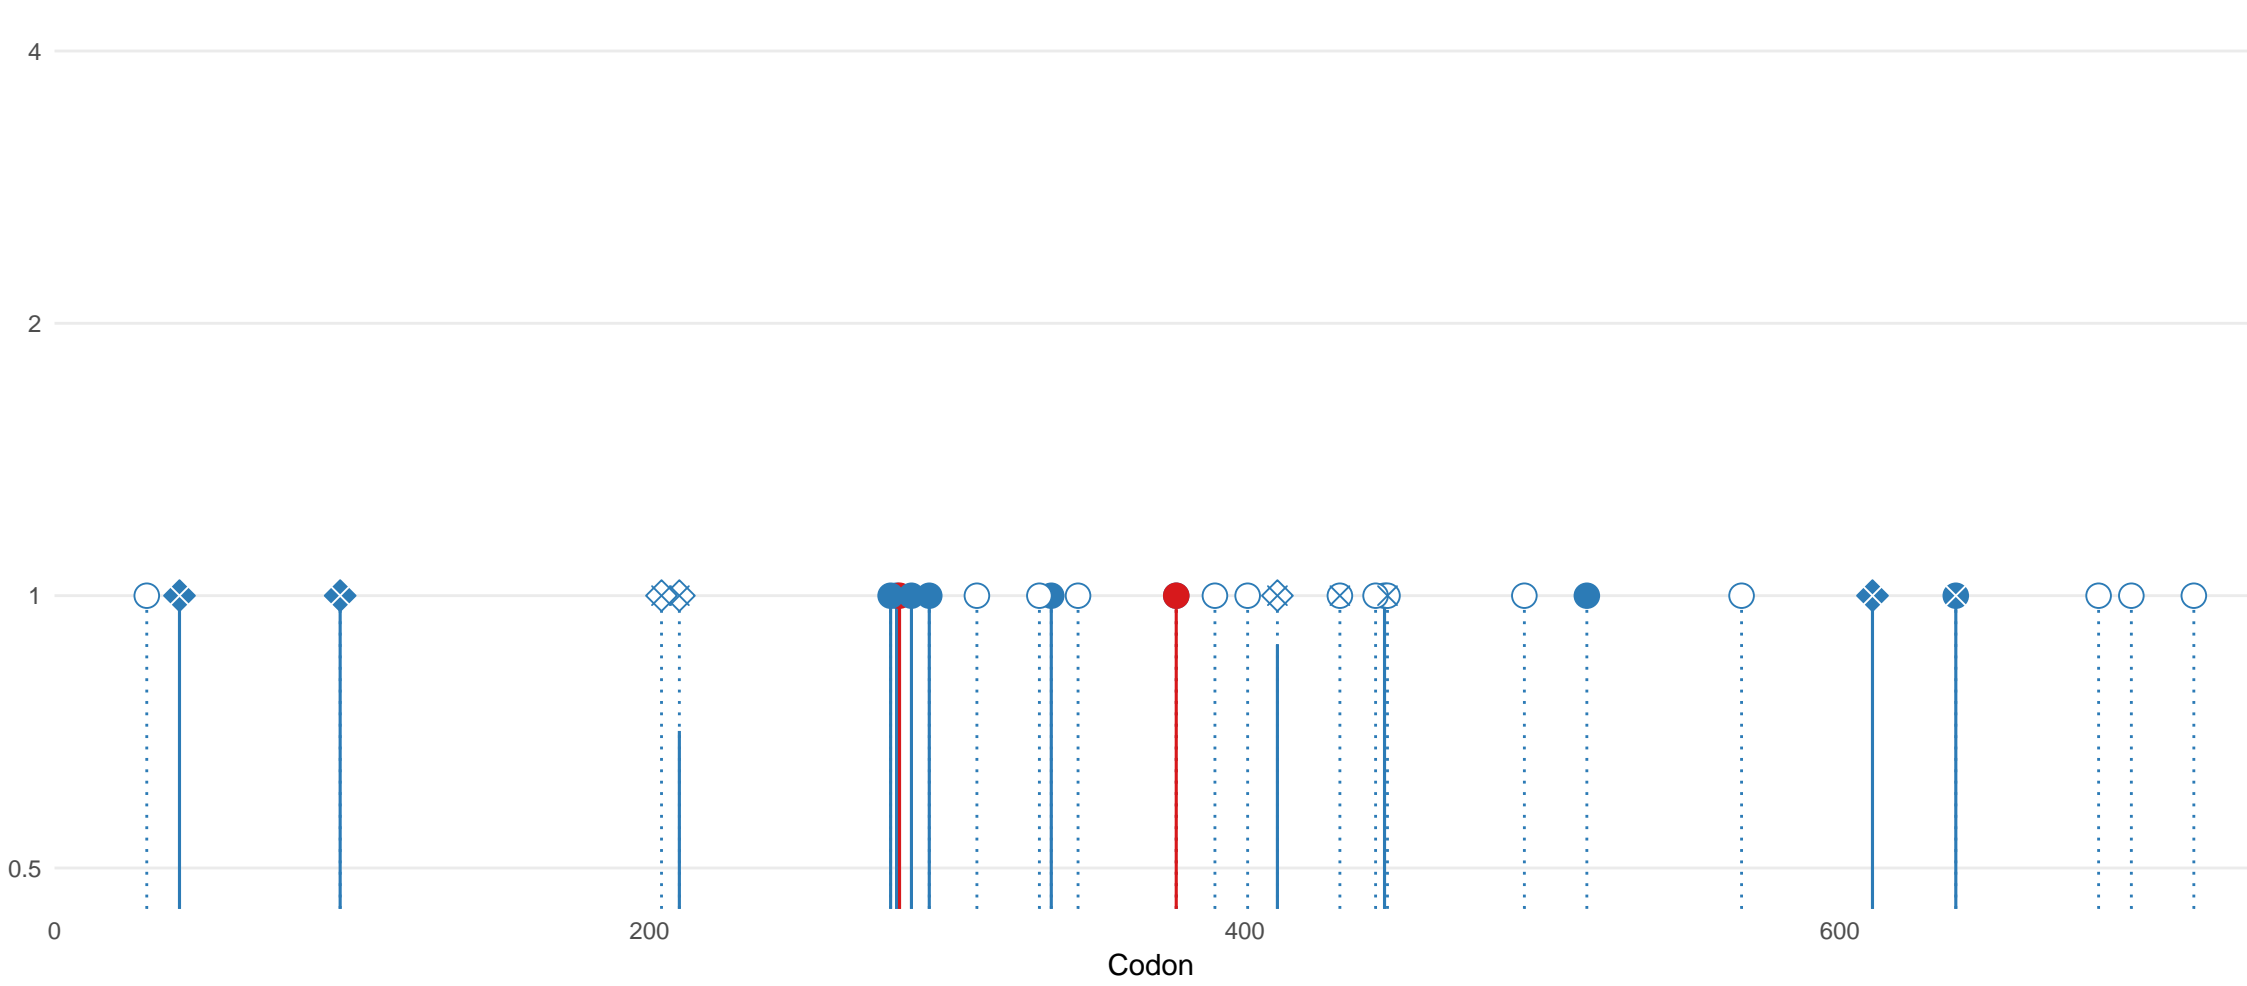

**Monoallelic:** ○ SNV □ MNV ◇ INDEL in frame ⊗ SNV nonsense ⊗ MNV nonsense ⊗ INDEL out of frame  
**Biallelic/Multihit:** ● SNV ■ MNV ◆ INDEL in frame ⊗ SNV nonsense ⊗ MNV nonsense ◆ INDEL out of frame  
**Hotspot:** ●

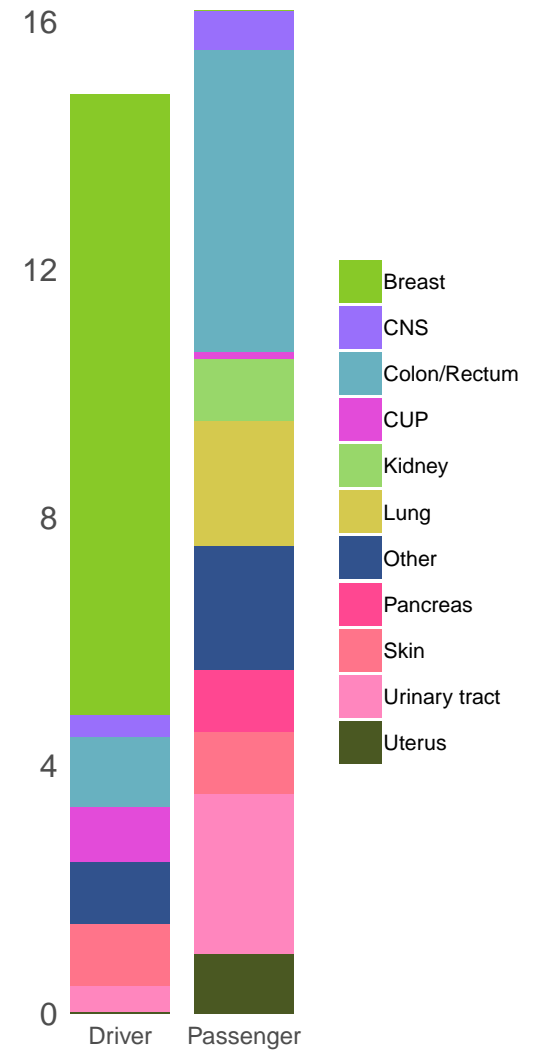

# CTNNA1 Variants

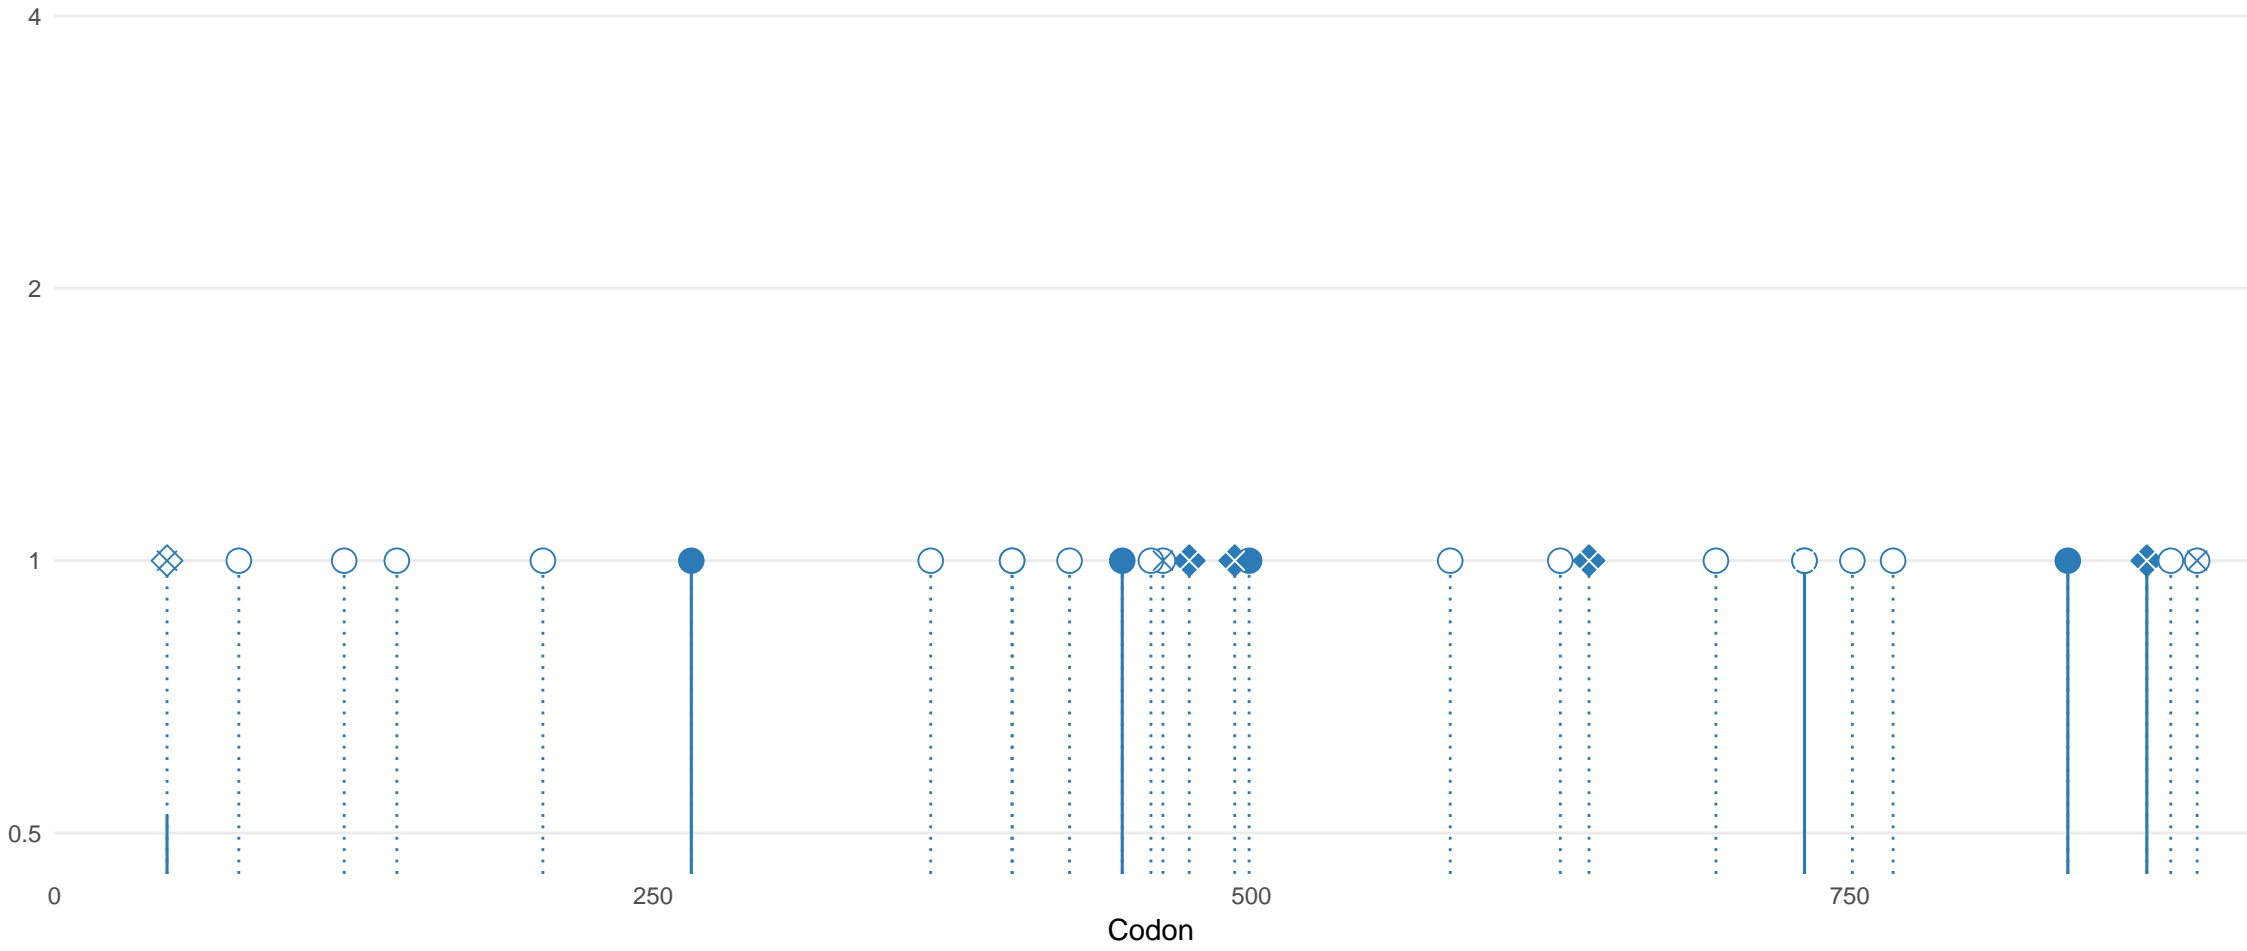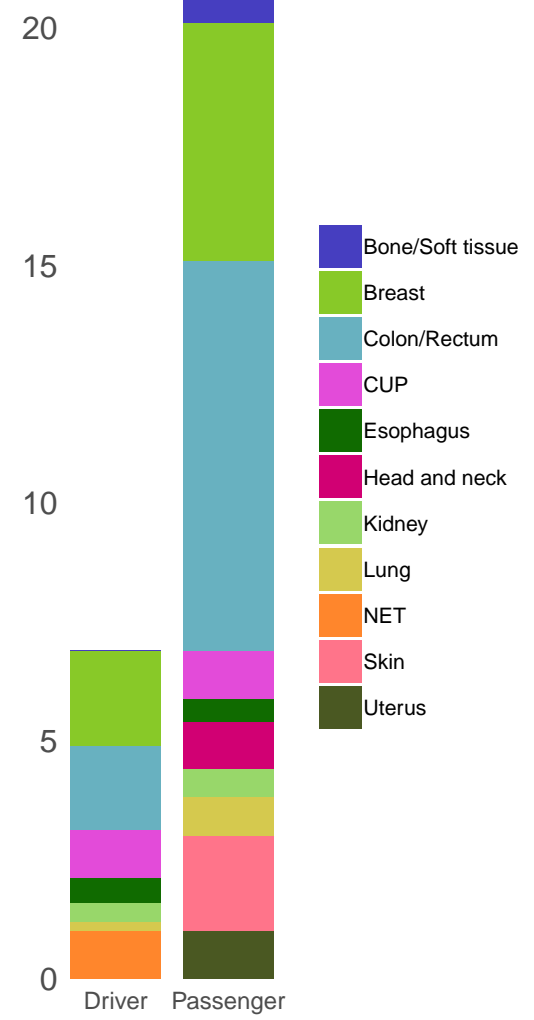

# CYLD Variants

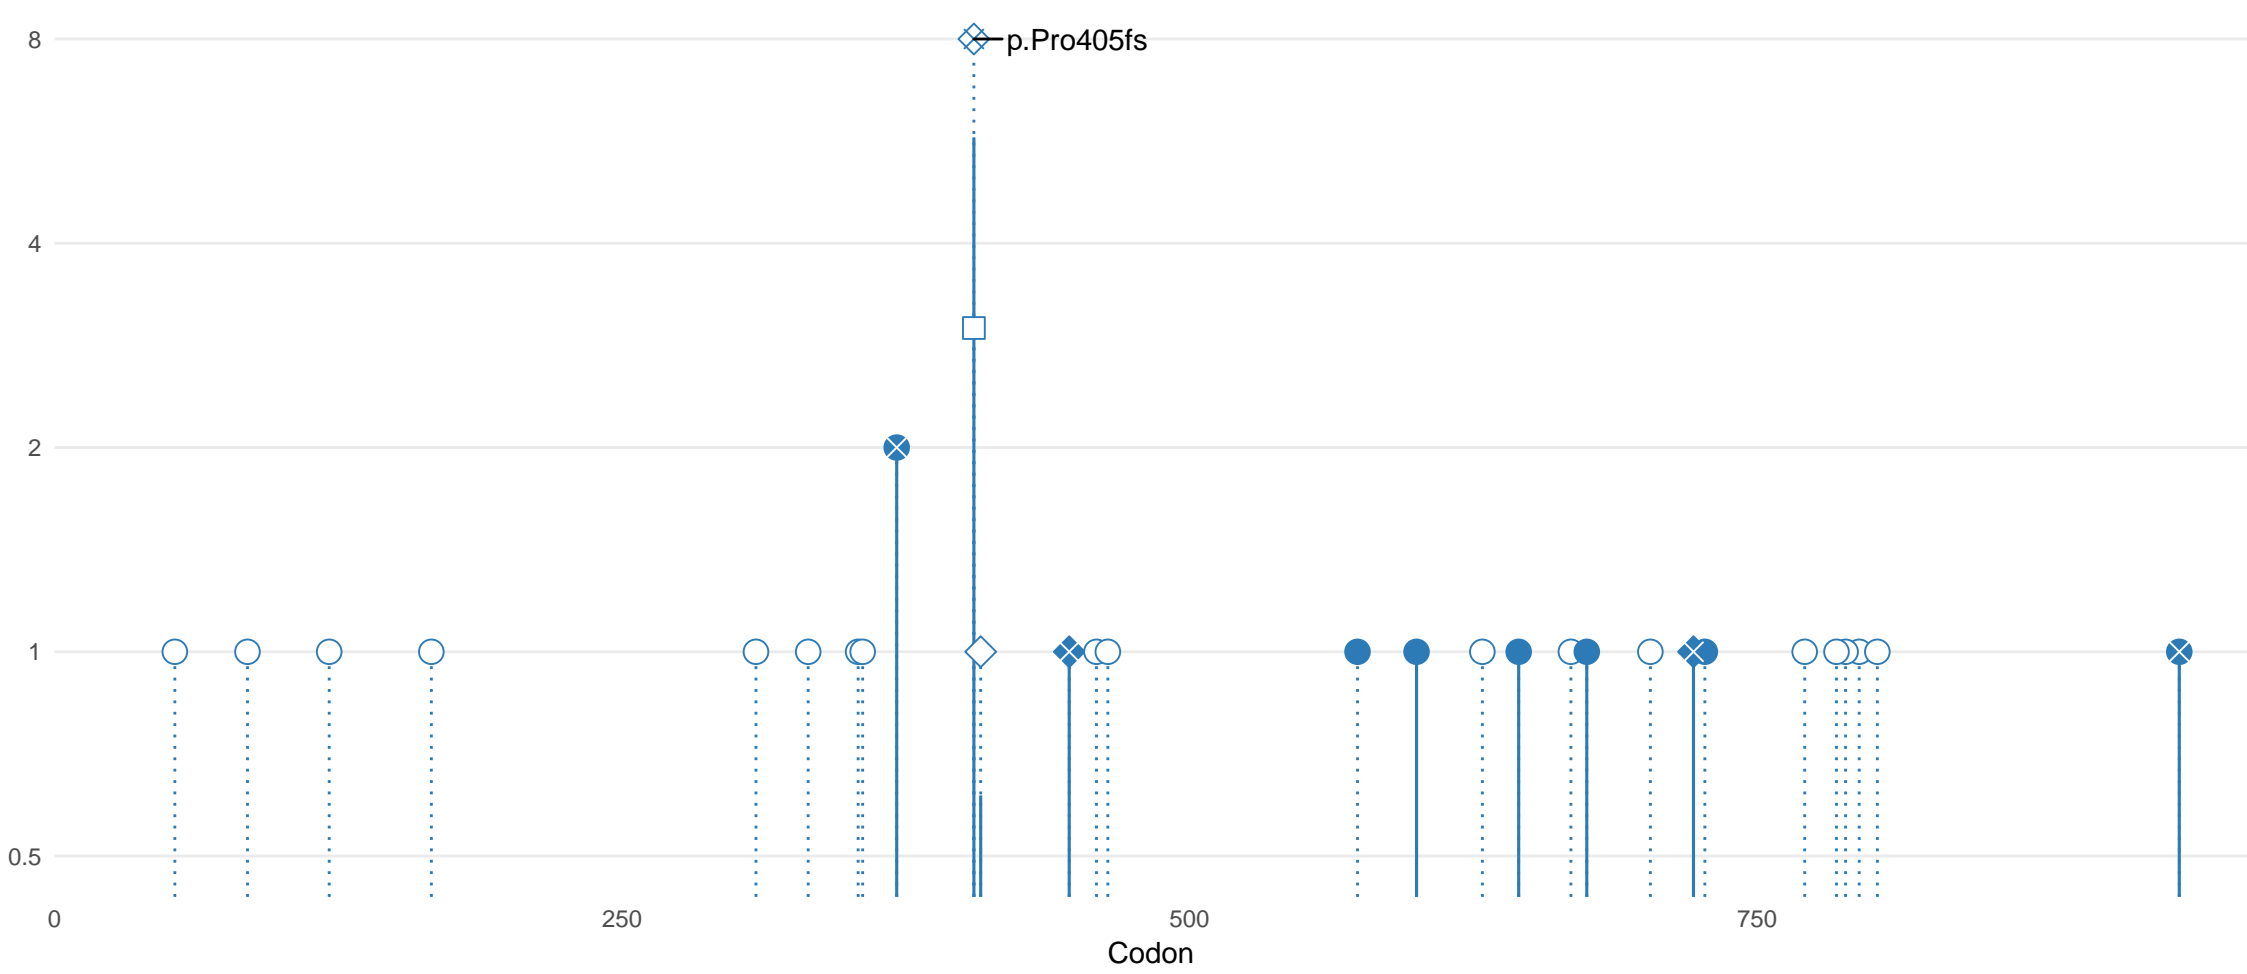

**Monoallelic:** ○ SNV □ MNV ◇ INDEL in frame ⊗ SNV nonsense ⊗ MNV nonsense ⊗ INDEL out of frame  
**Biallelic/Multihit:** ● SNV ■ MNV ◆ INDEL in frame ⊗ SNV nonsense ⊗ MNV nonsense ◆ INDEL out of frame  
**Hotspot:** ●

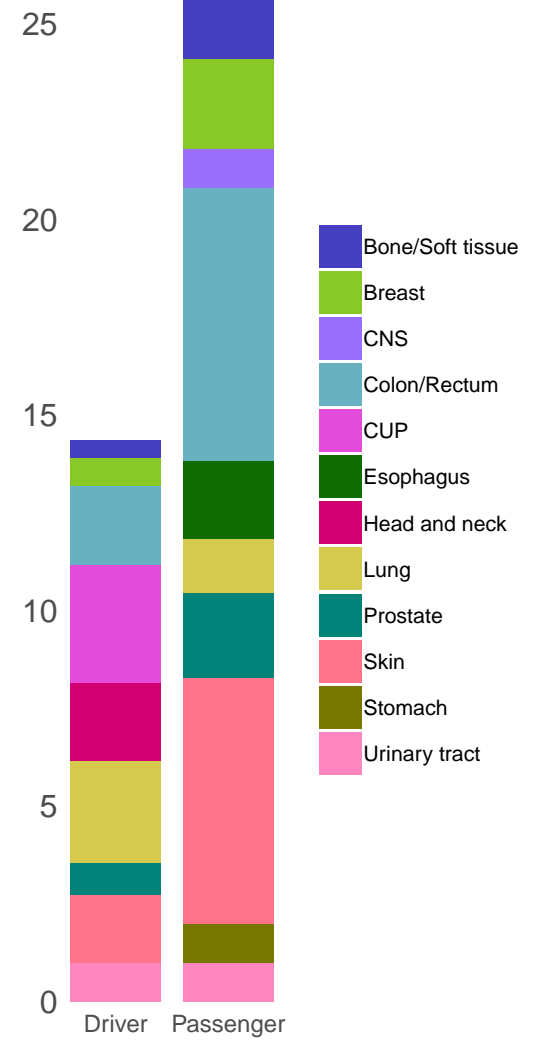

# DAXX Variants

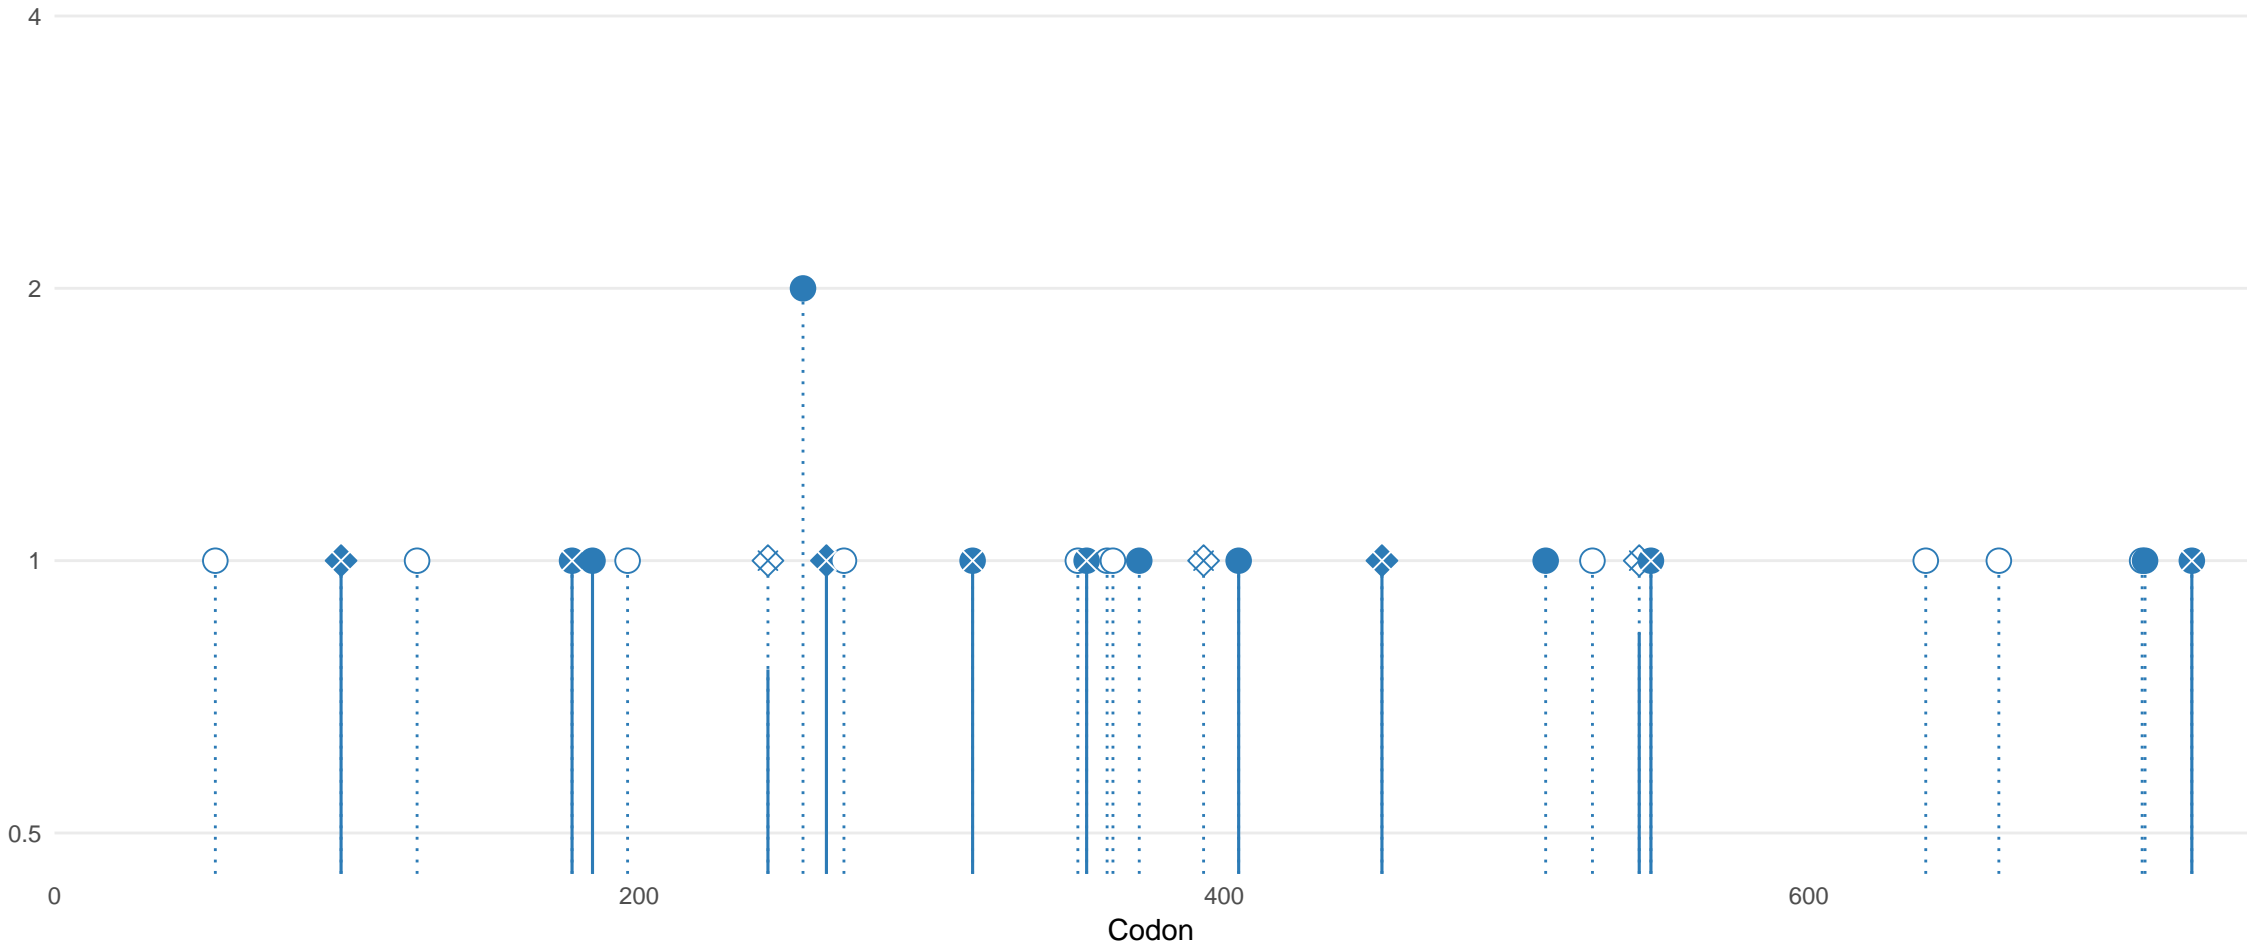

Monoallelic: ○ SNV □ MNV ◇ INDEL in frame ⊗ SNV nonsense ⊗ MNV nonsense ⊗ INDEL out of frame  
 Biallelic/Multihit: ● SNV ■ MNV ◆ INDEL in frame ⊗ SNV nonsense ⊗ MNV nonsense ◆ INDEL out of frame  
 Hotspot: ●

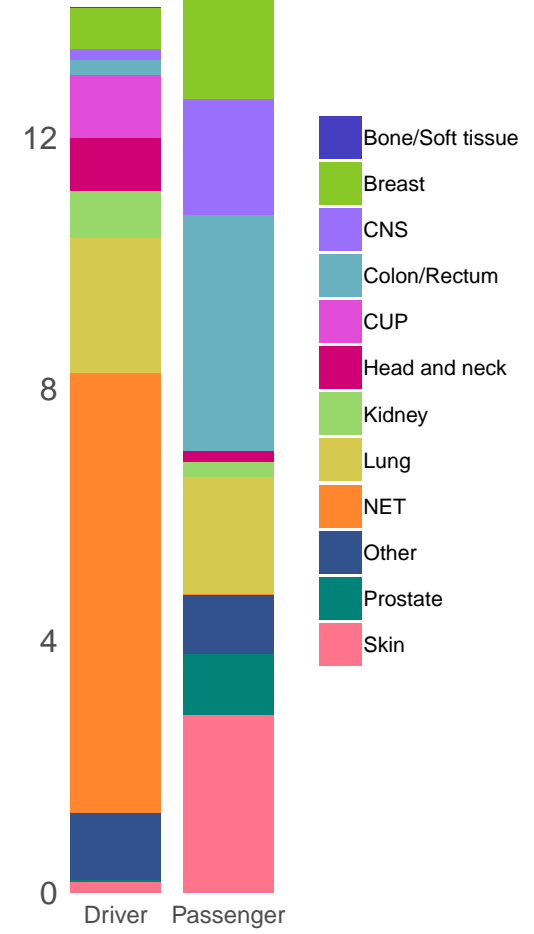

# DDX3X Variants

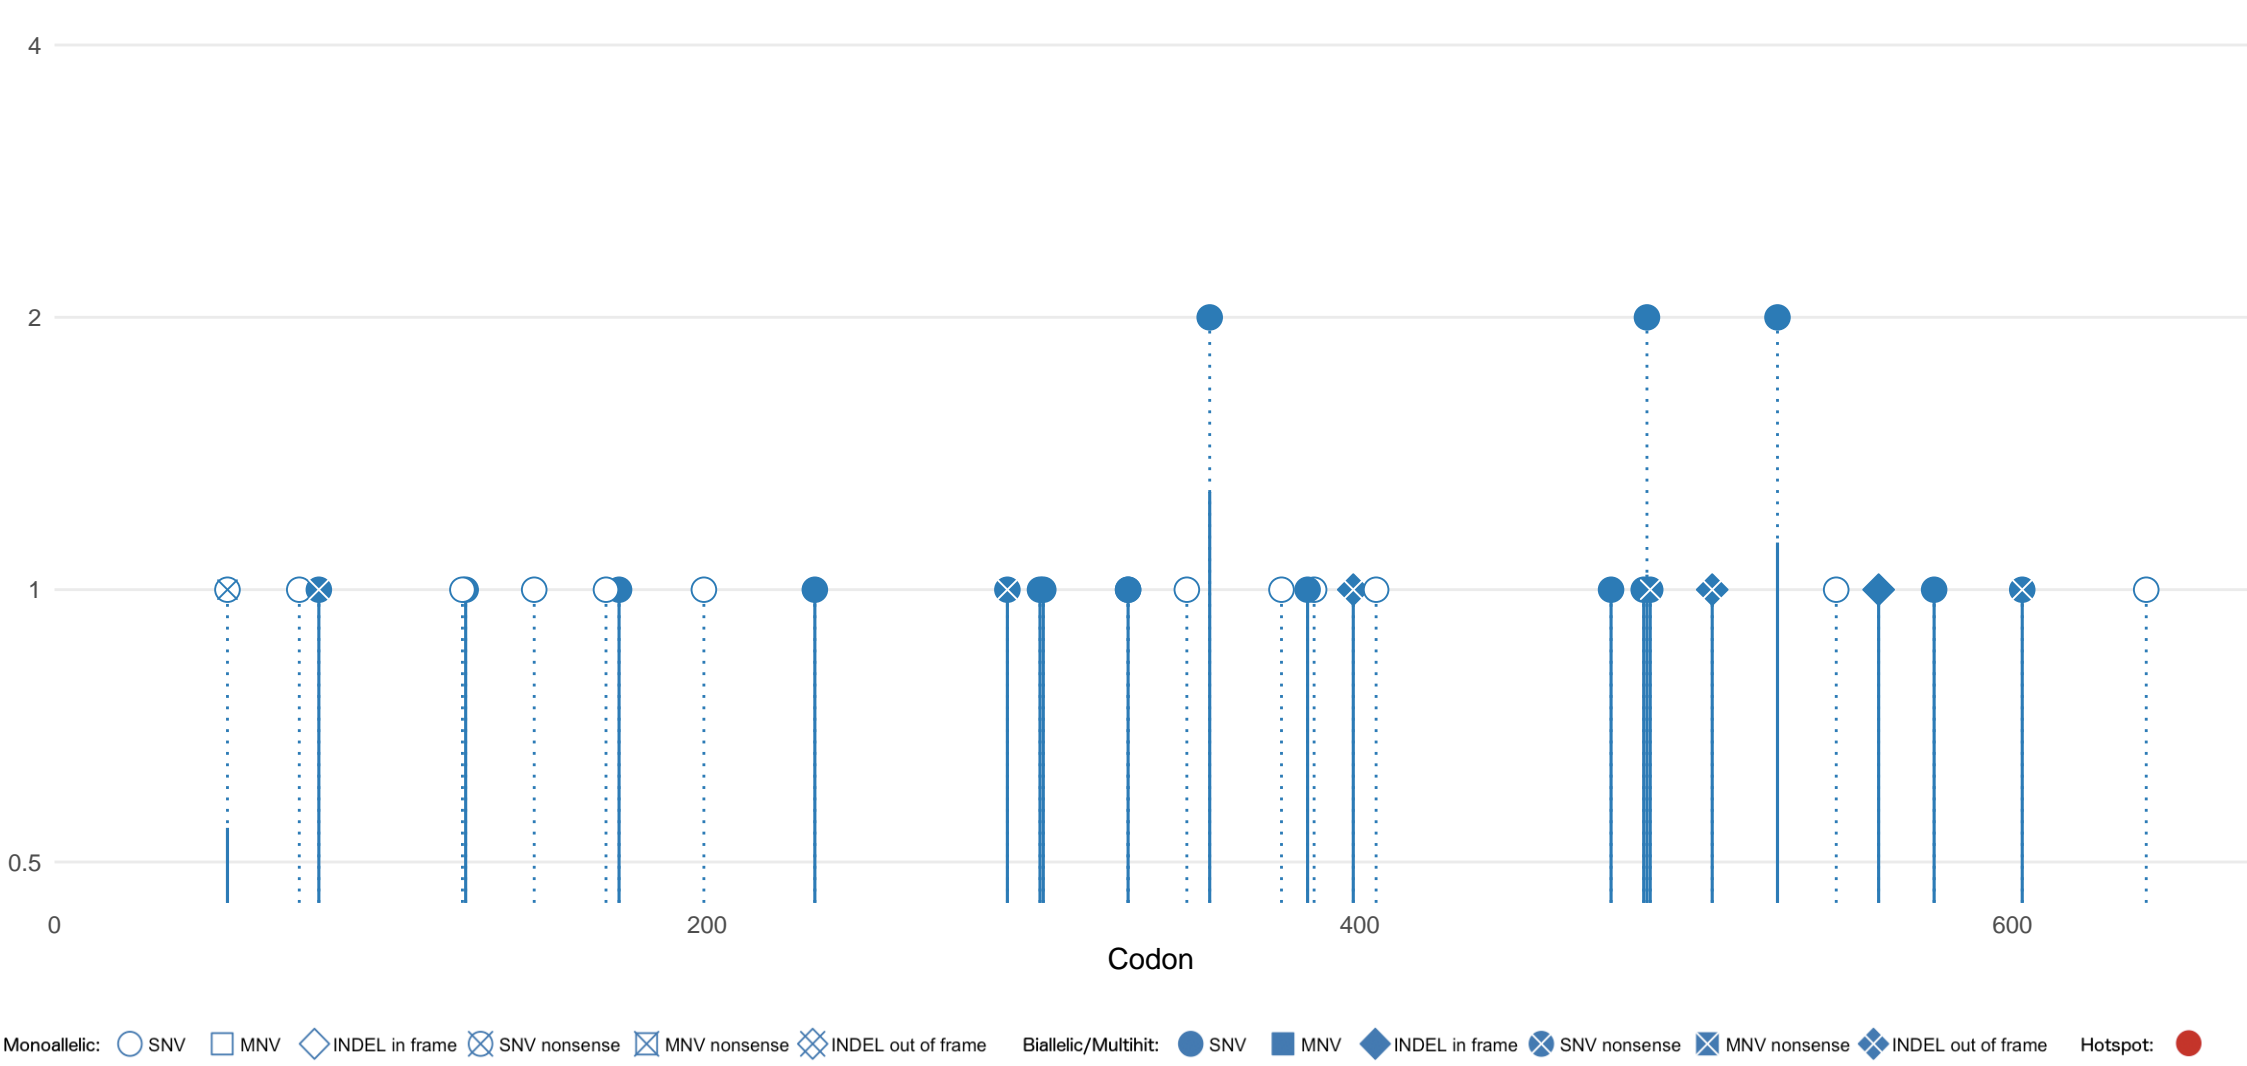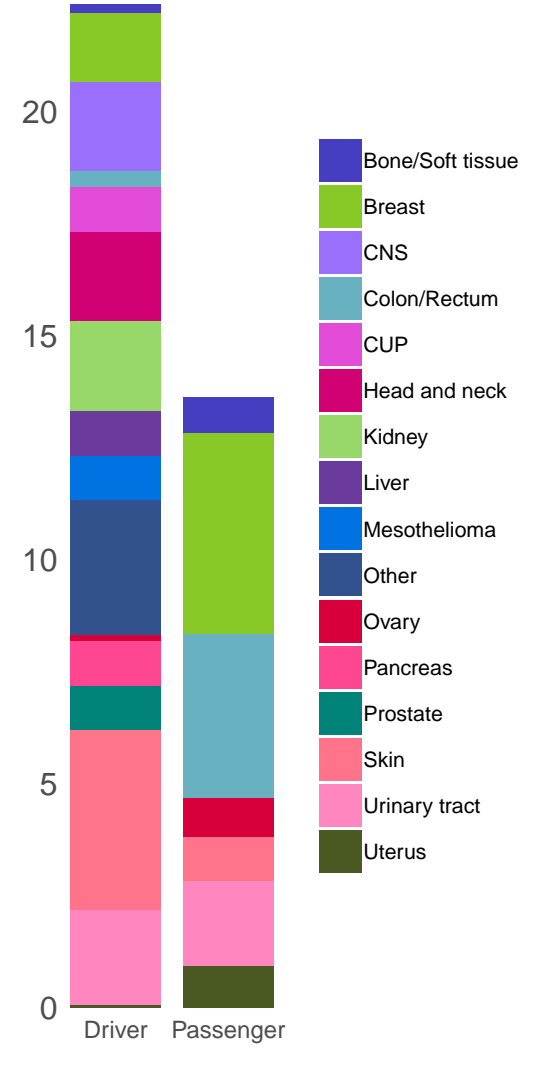

# DICER1 Variants

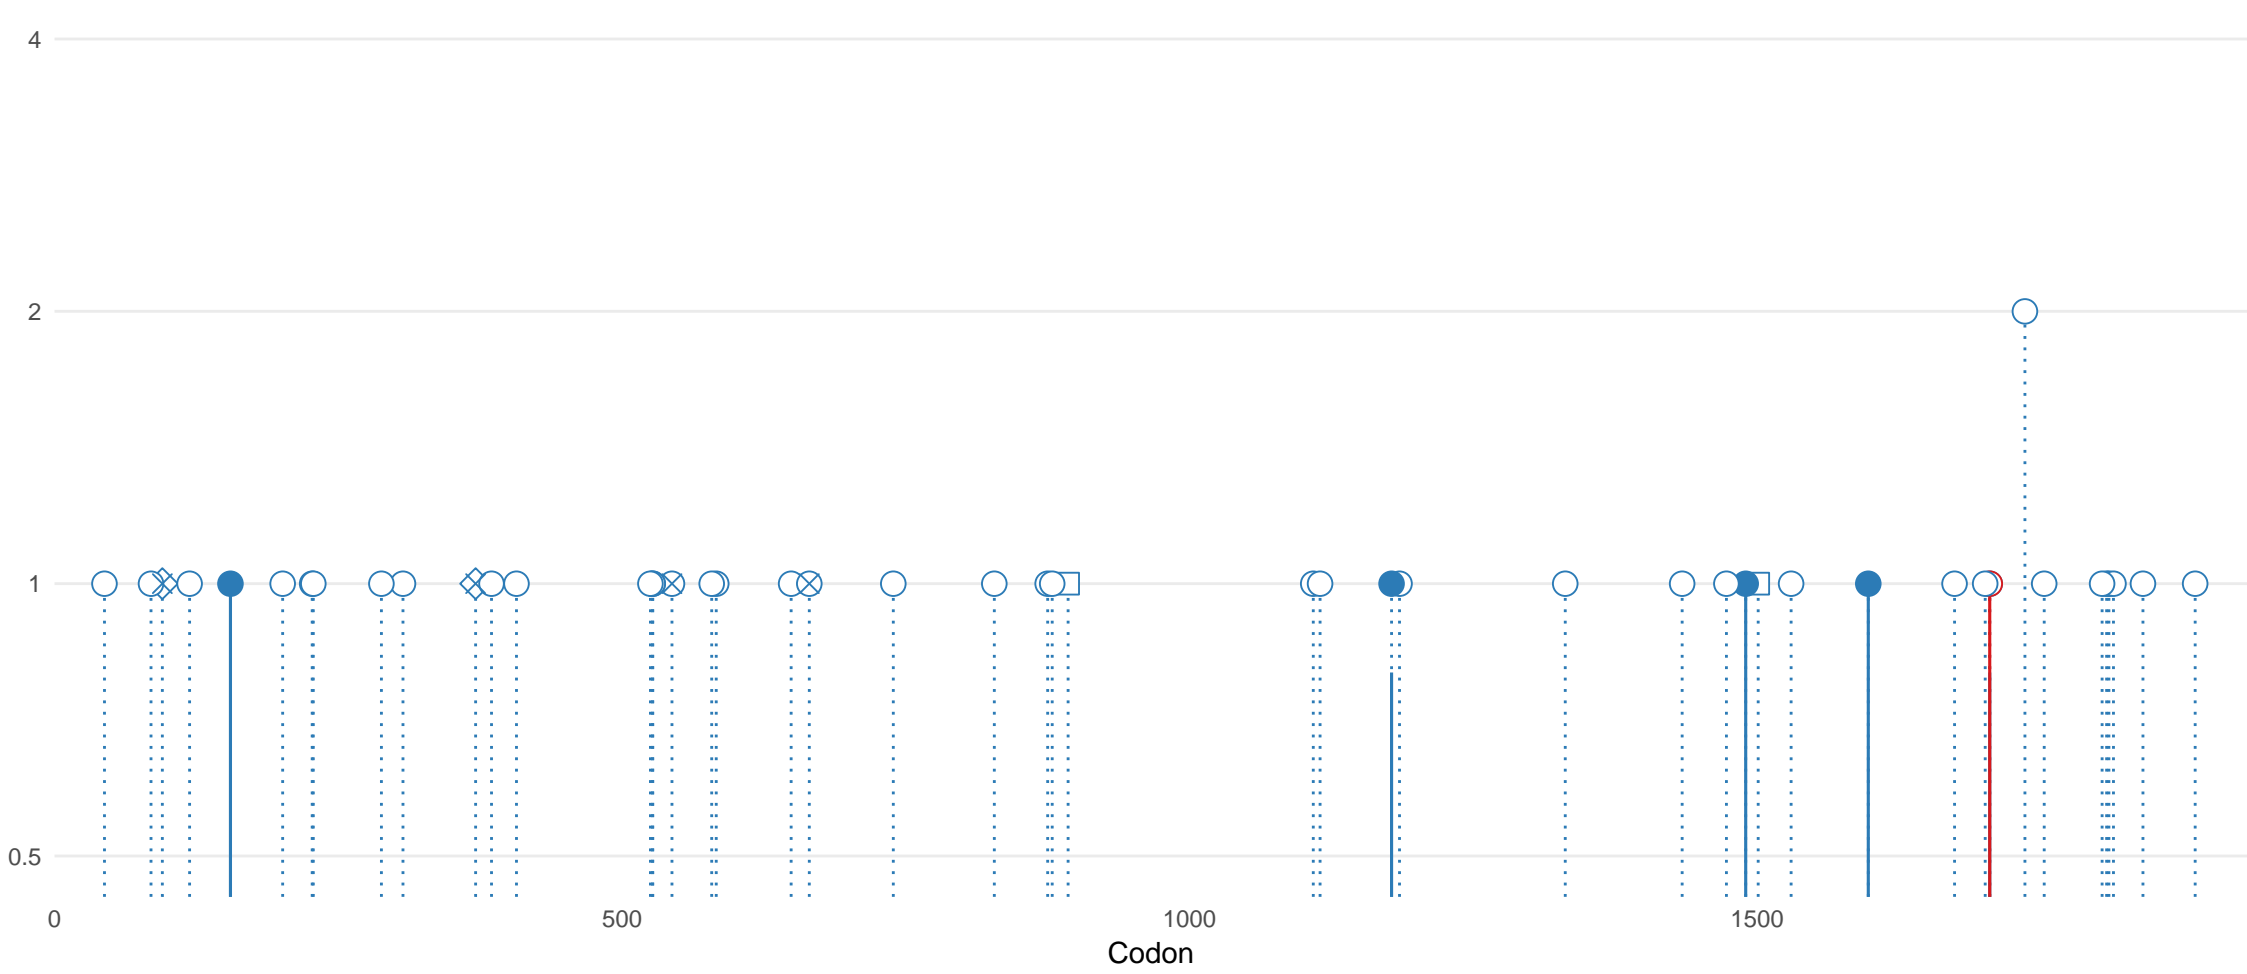

**Monoallelic:** ○ SNV □ MNV ◇ INDEL in frame ⊗ SNV nonsense ⊗ MNV nonsense ⊗ INDEL out of frame  
**Biallelic/Multihit:** ● SNV ■ MNV ◆ INDEL in frame ⊗ SNV nonsense ⊗ MNV nonsense ◆ INDEL out of frame  
**Hotspot:** ●

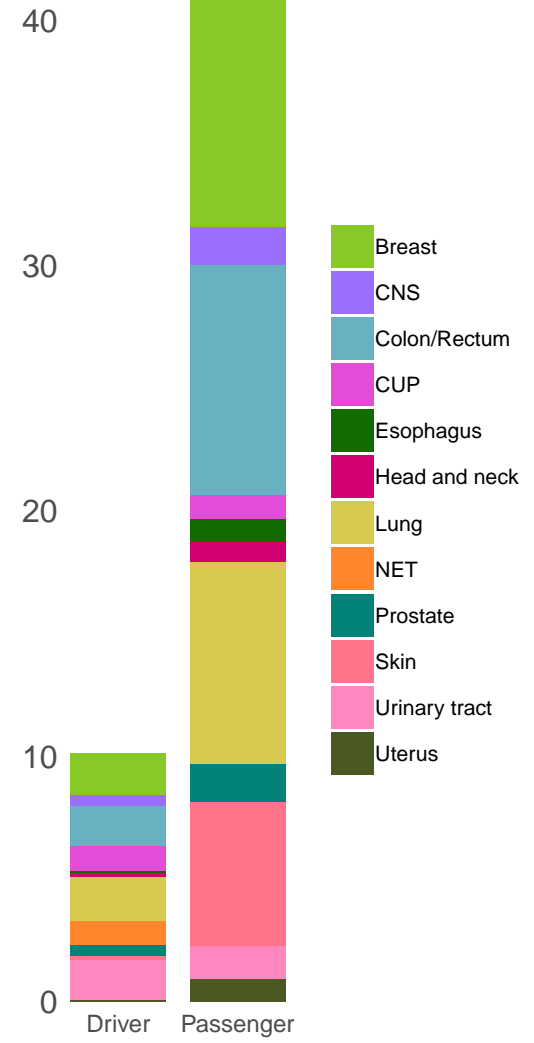

# DNM2 Variants

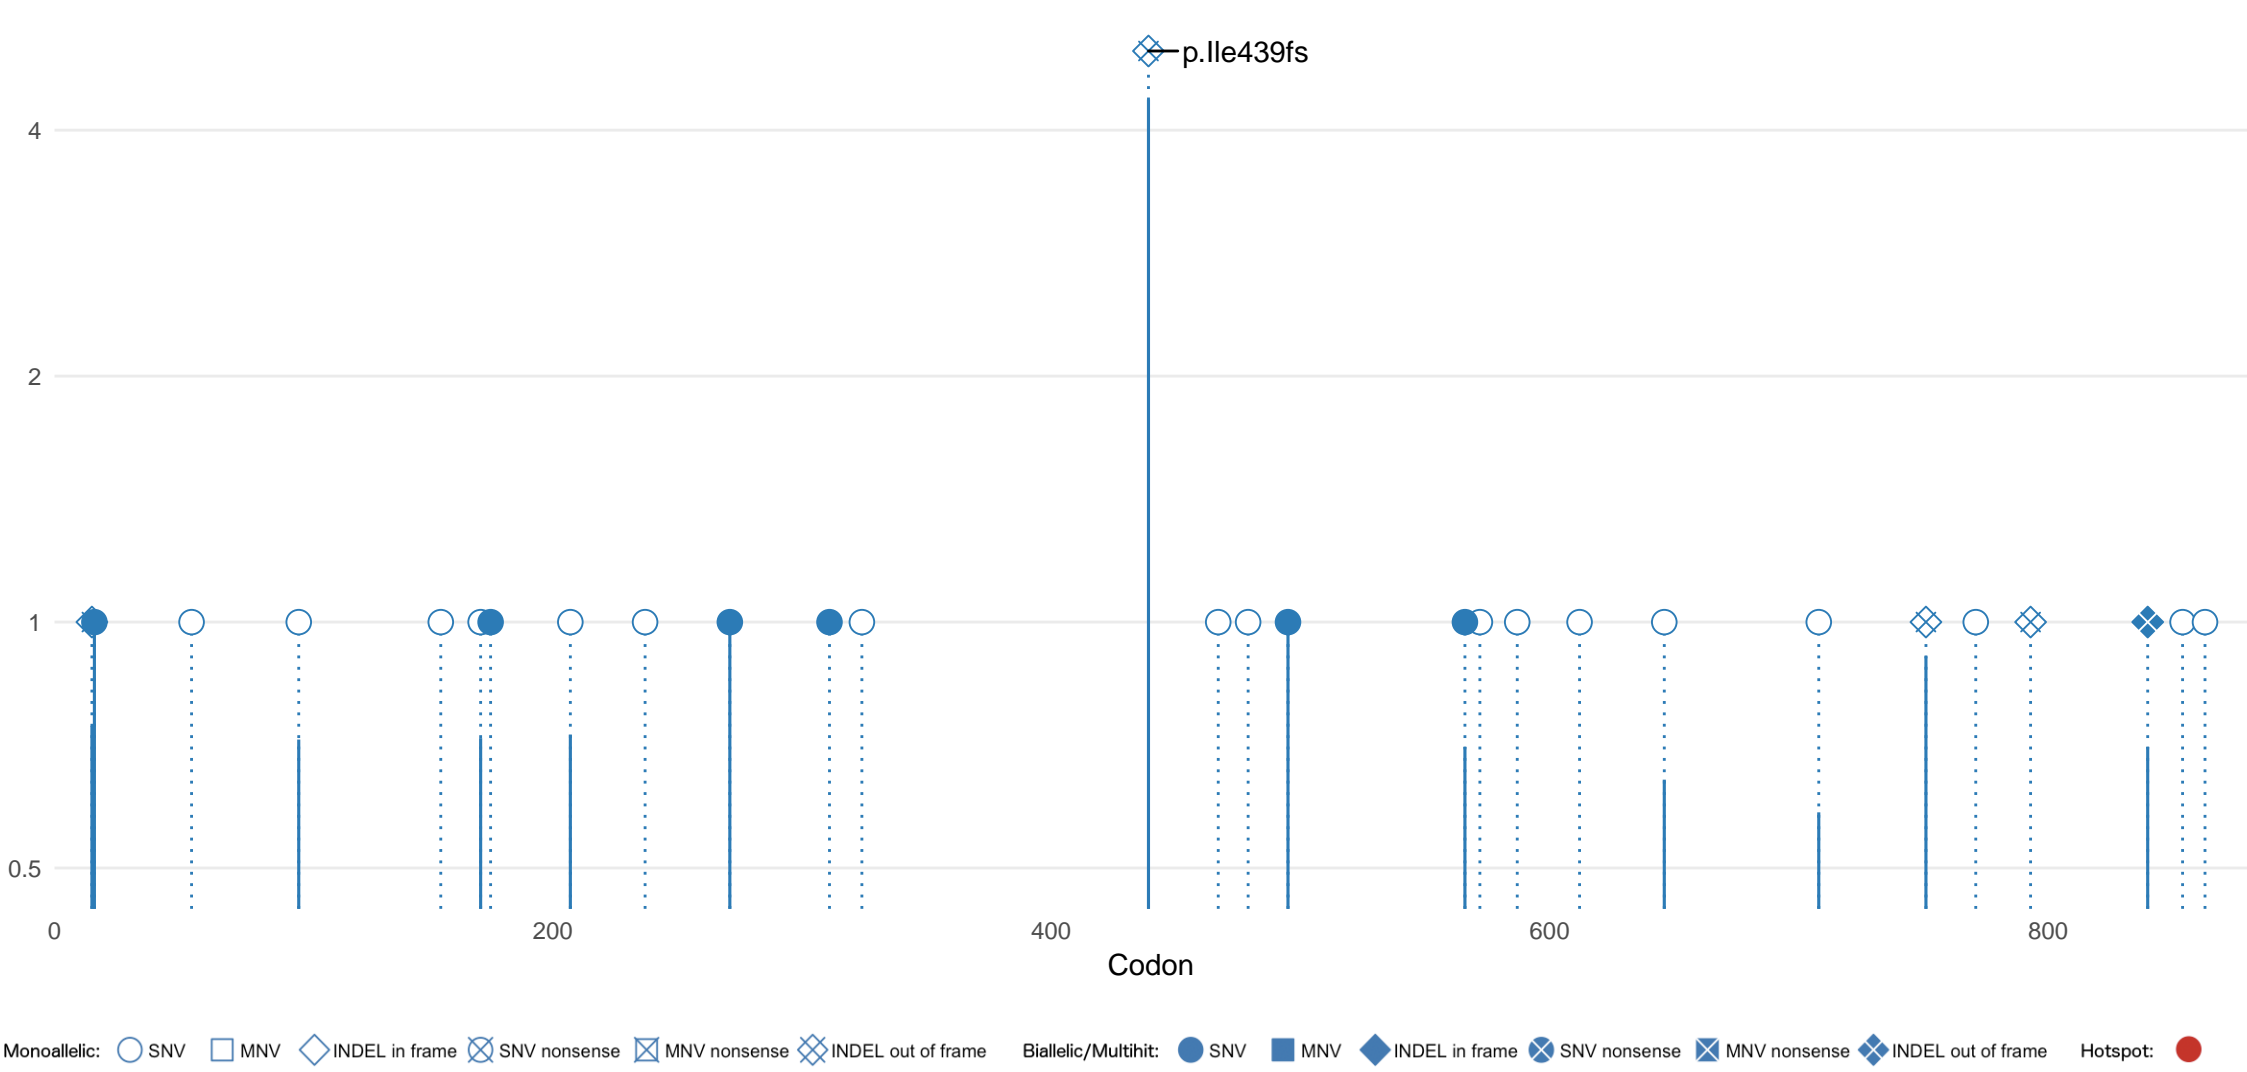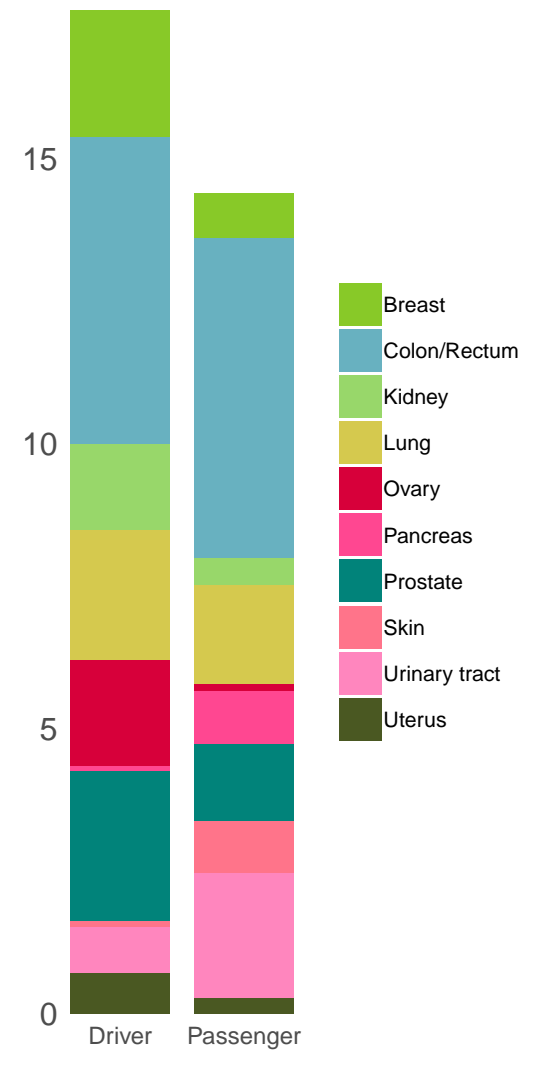

Monoallelic: ○ SNV □ MNV ◇ INDEL in frame ⊗ SNV nonsense ⊗ MNV nonsense ⊗ INDEL out of frame  
 Biallelic/Multihit: ● SNV ■ MNV ◆ INDEL in frame ⊗ SNV nonsense ⊗ MNV nonsense ◆ INDEL out of frame  
 Hotspot: ●

# DNMT3A Variants

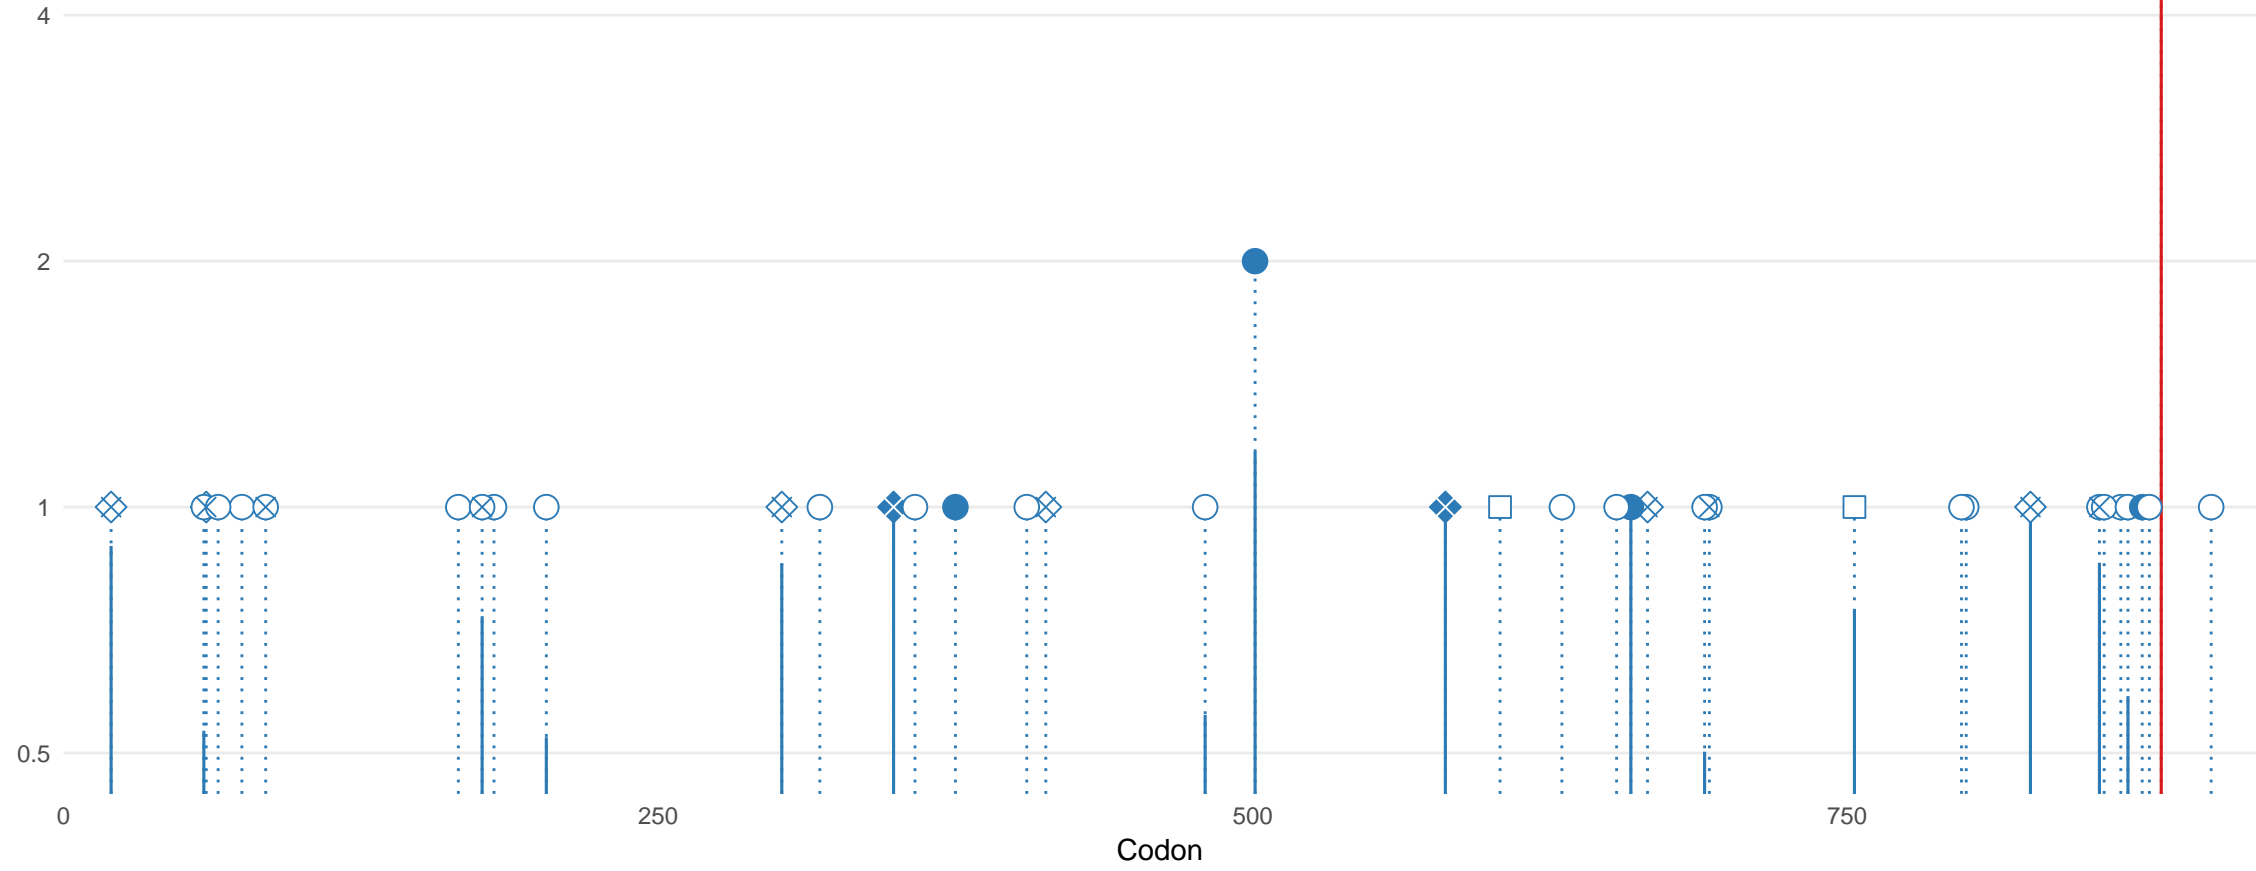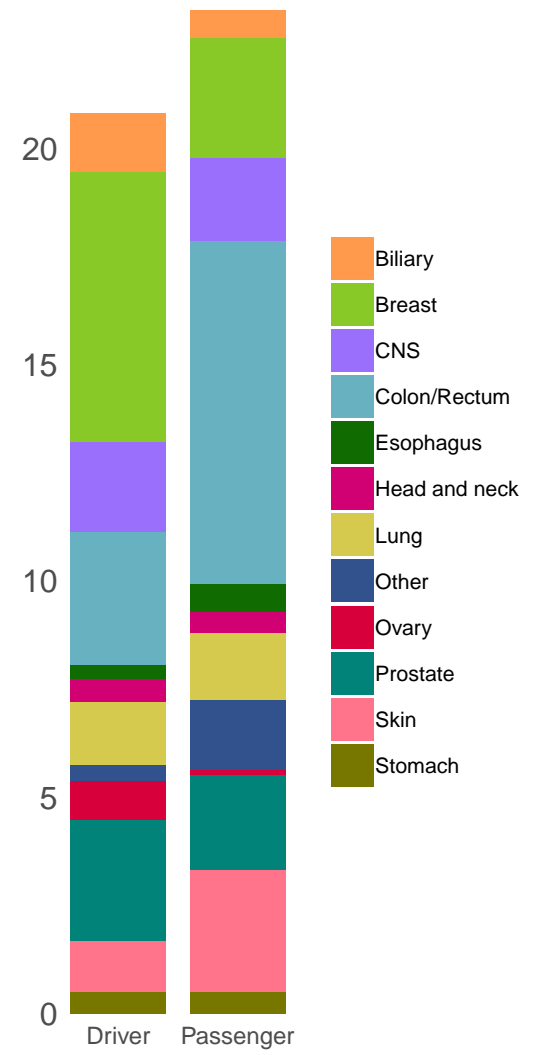



# DROSHA Variants

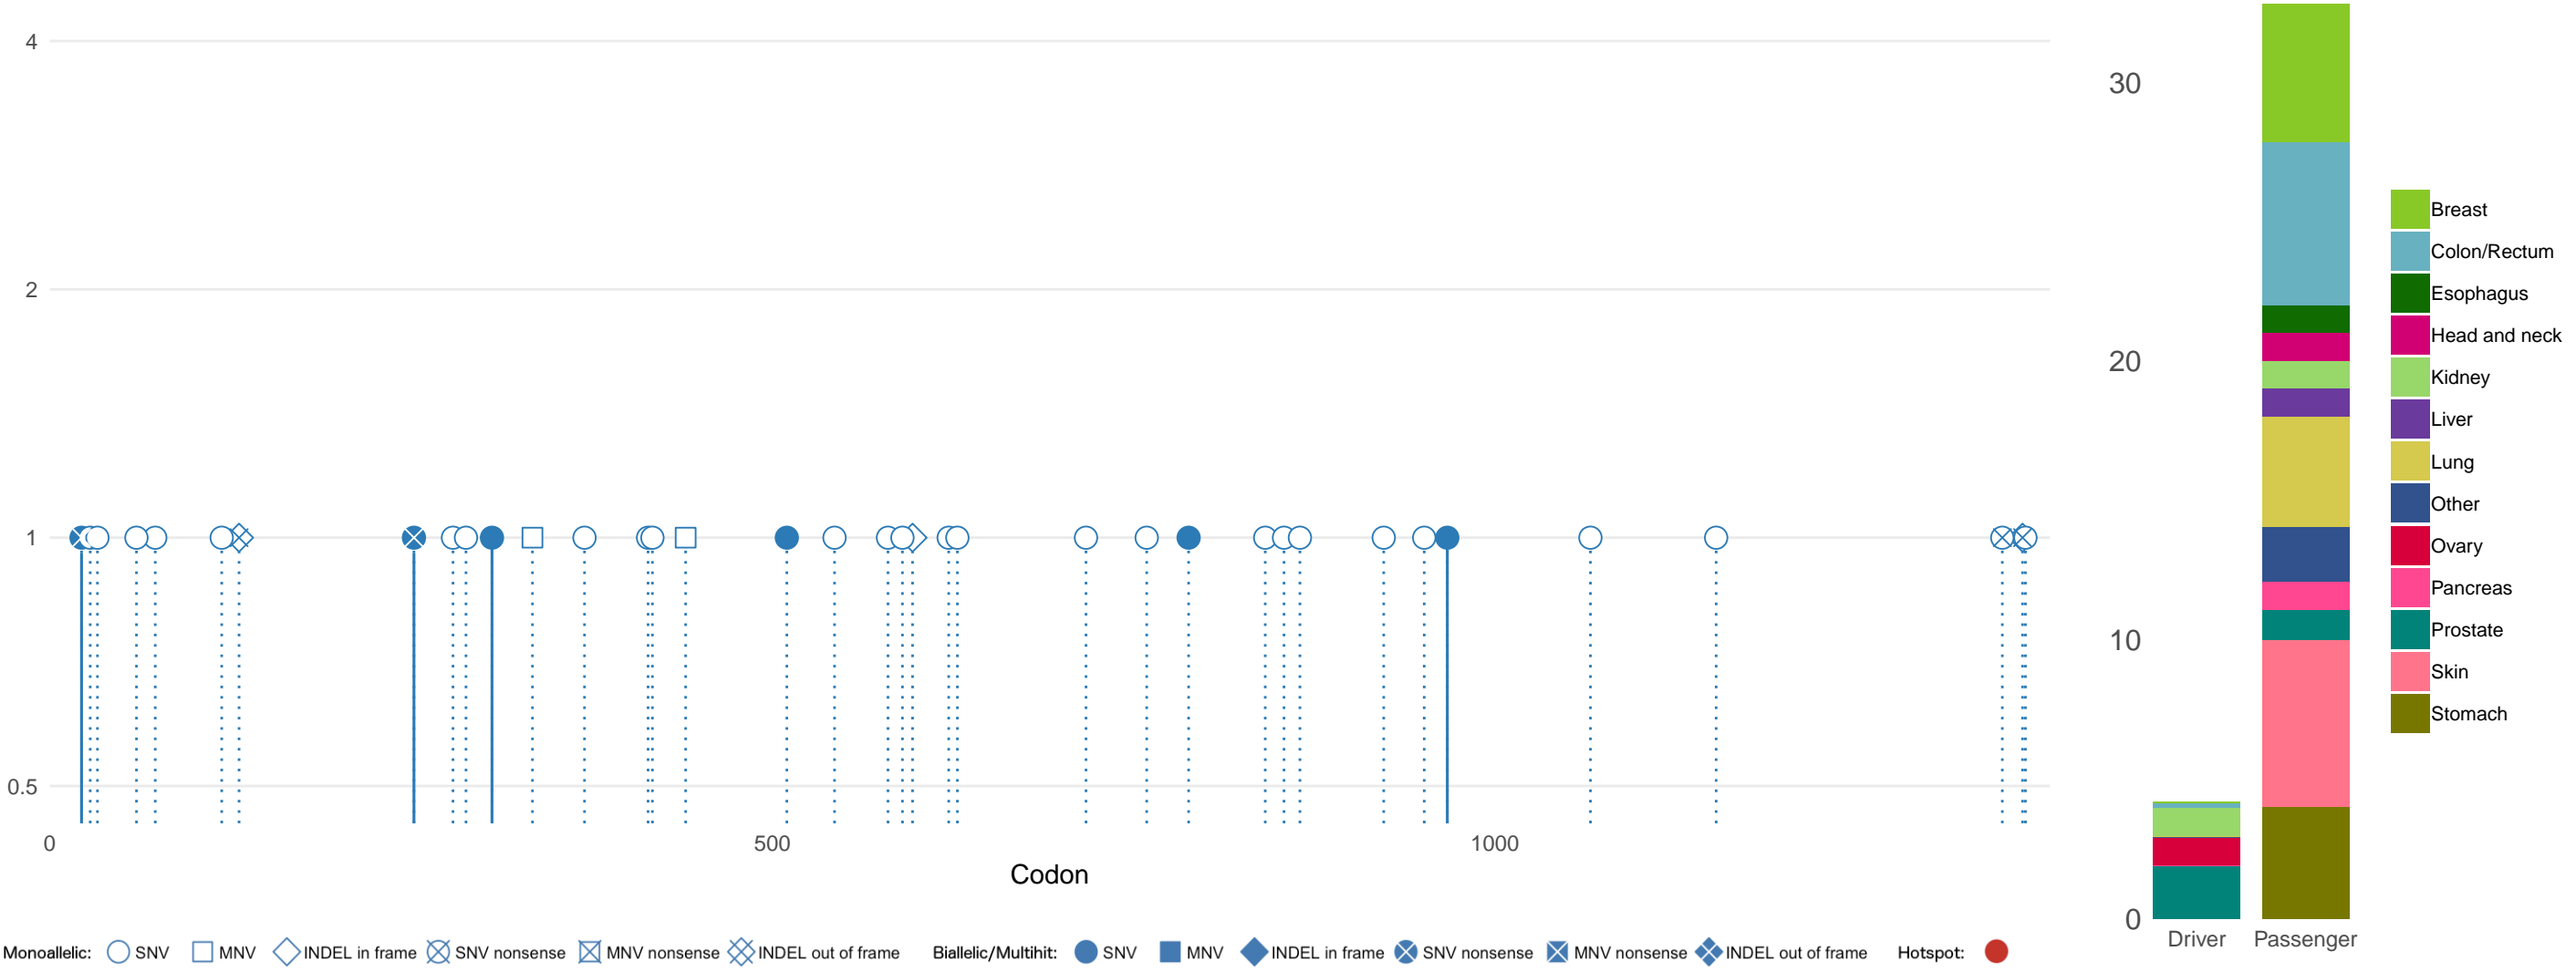

# ELF3 Variants

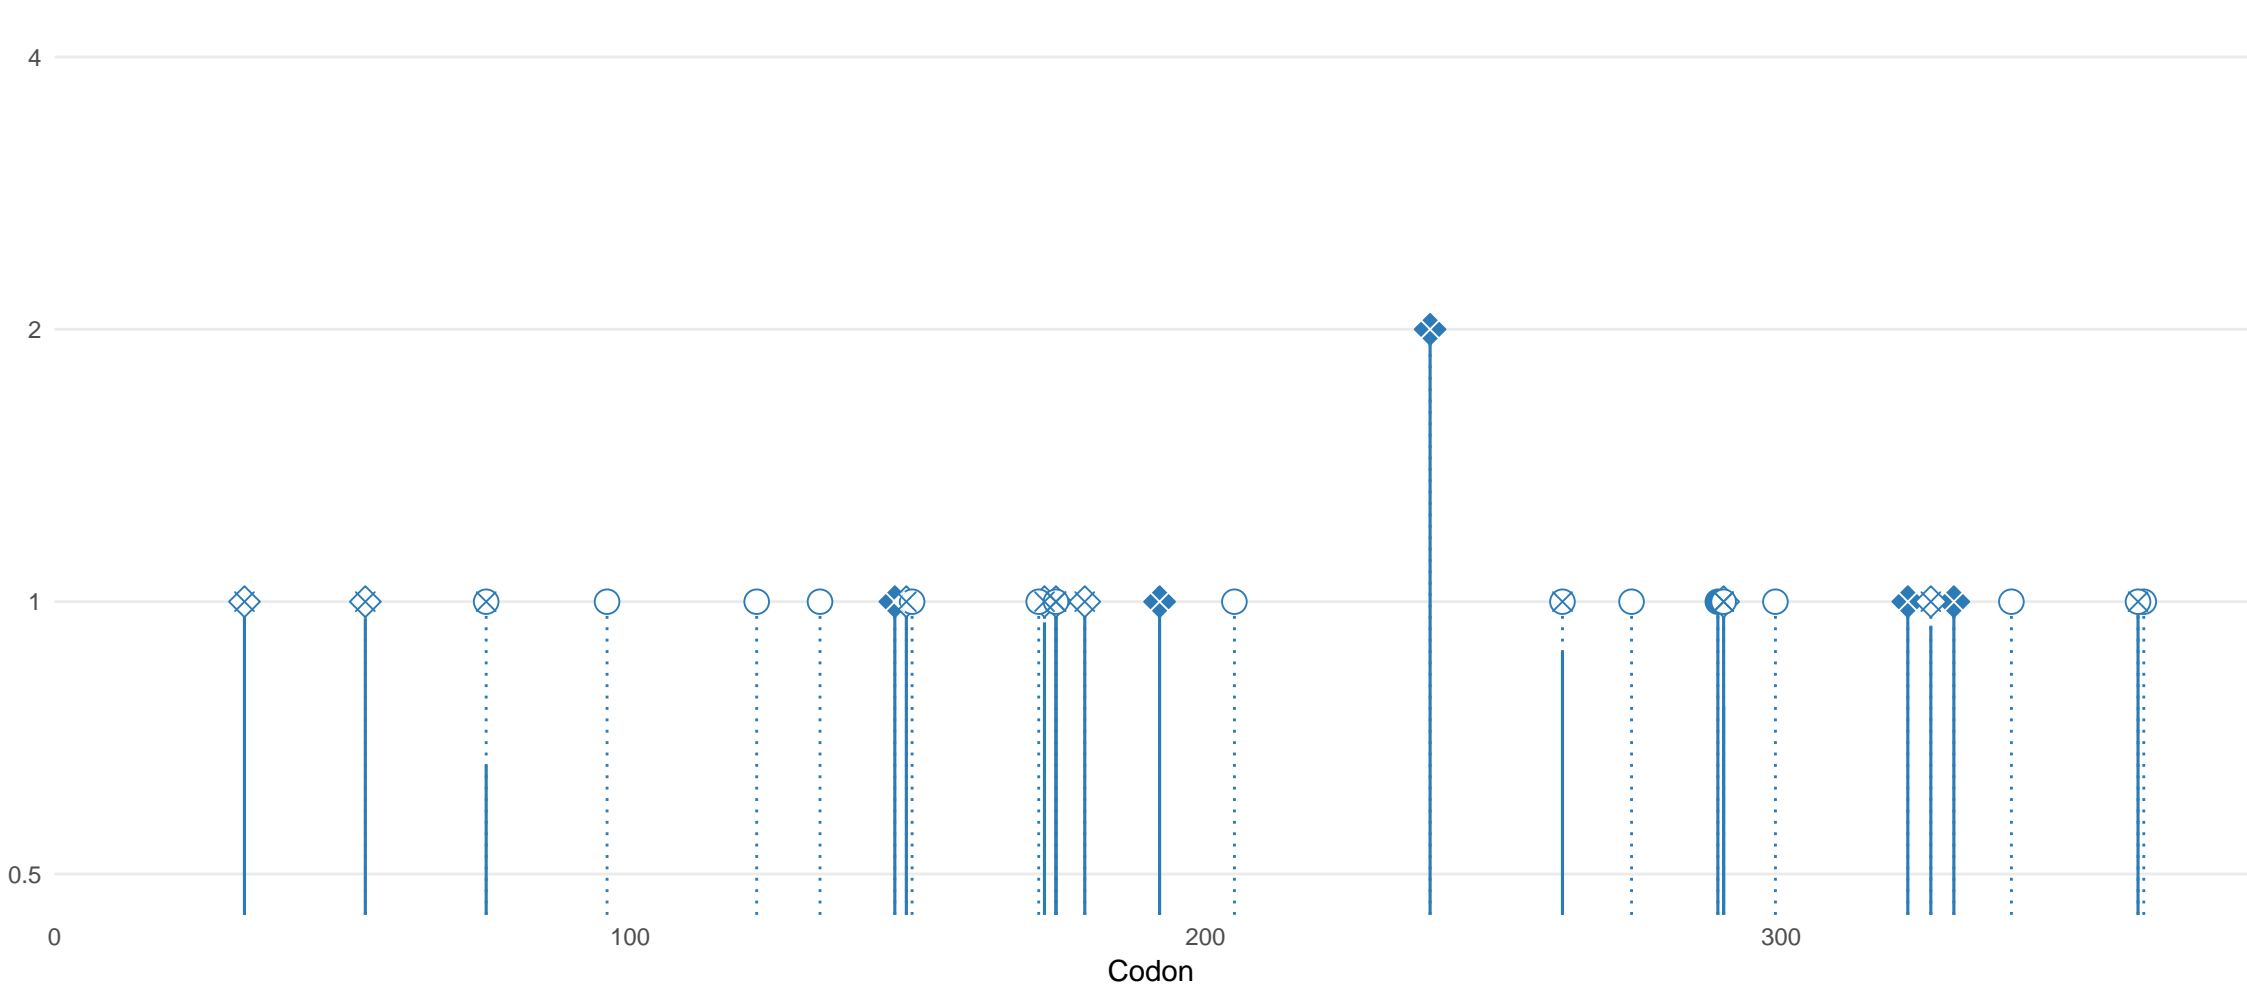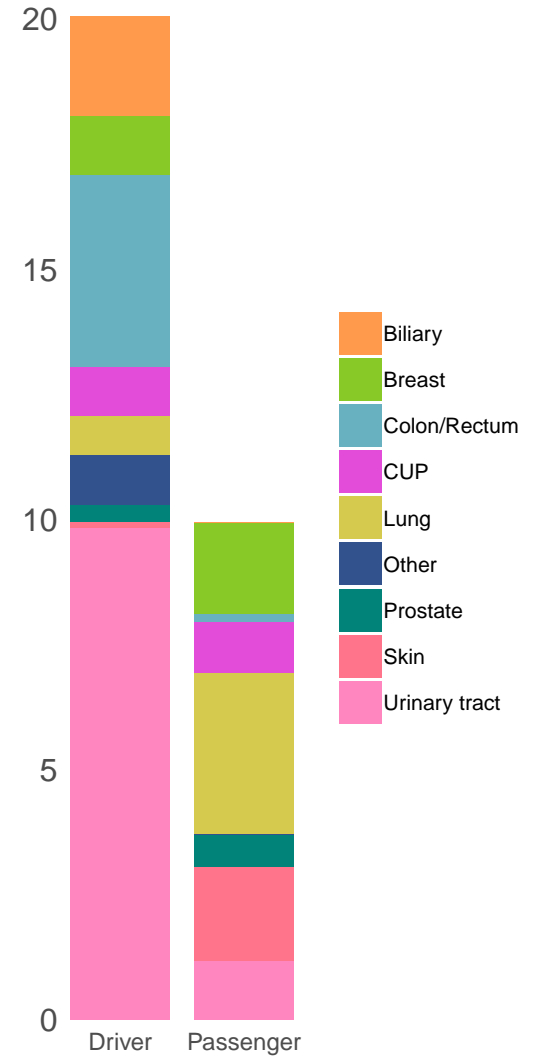

Monoallelic: ○ SNV □ MNV ◇ INDEL in frame ⊗ SNV nonsense ⊗ MNV nonsense ⊗ INDEL out of frame Biallelic/Multihit: ● SNV ■ MNV ◆ INDEL in frame ⊗ SNV nonsense ⊗ MNV nonsense ◆ INDEL out of frame Hotspot: ●

# EML4 Variants

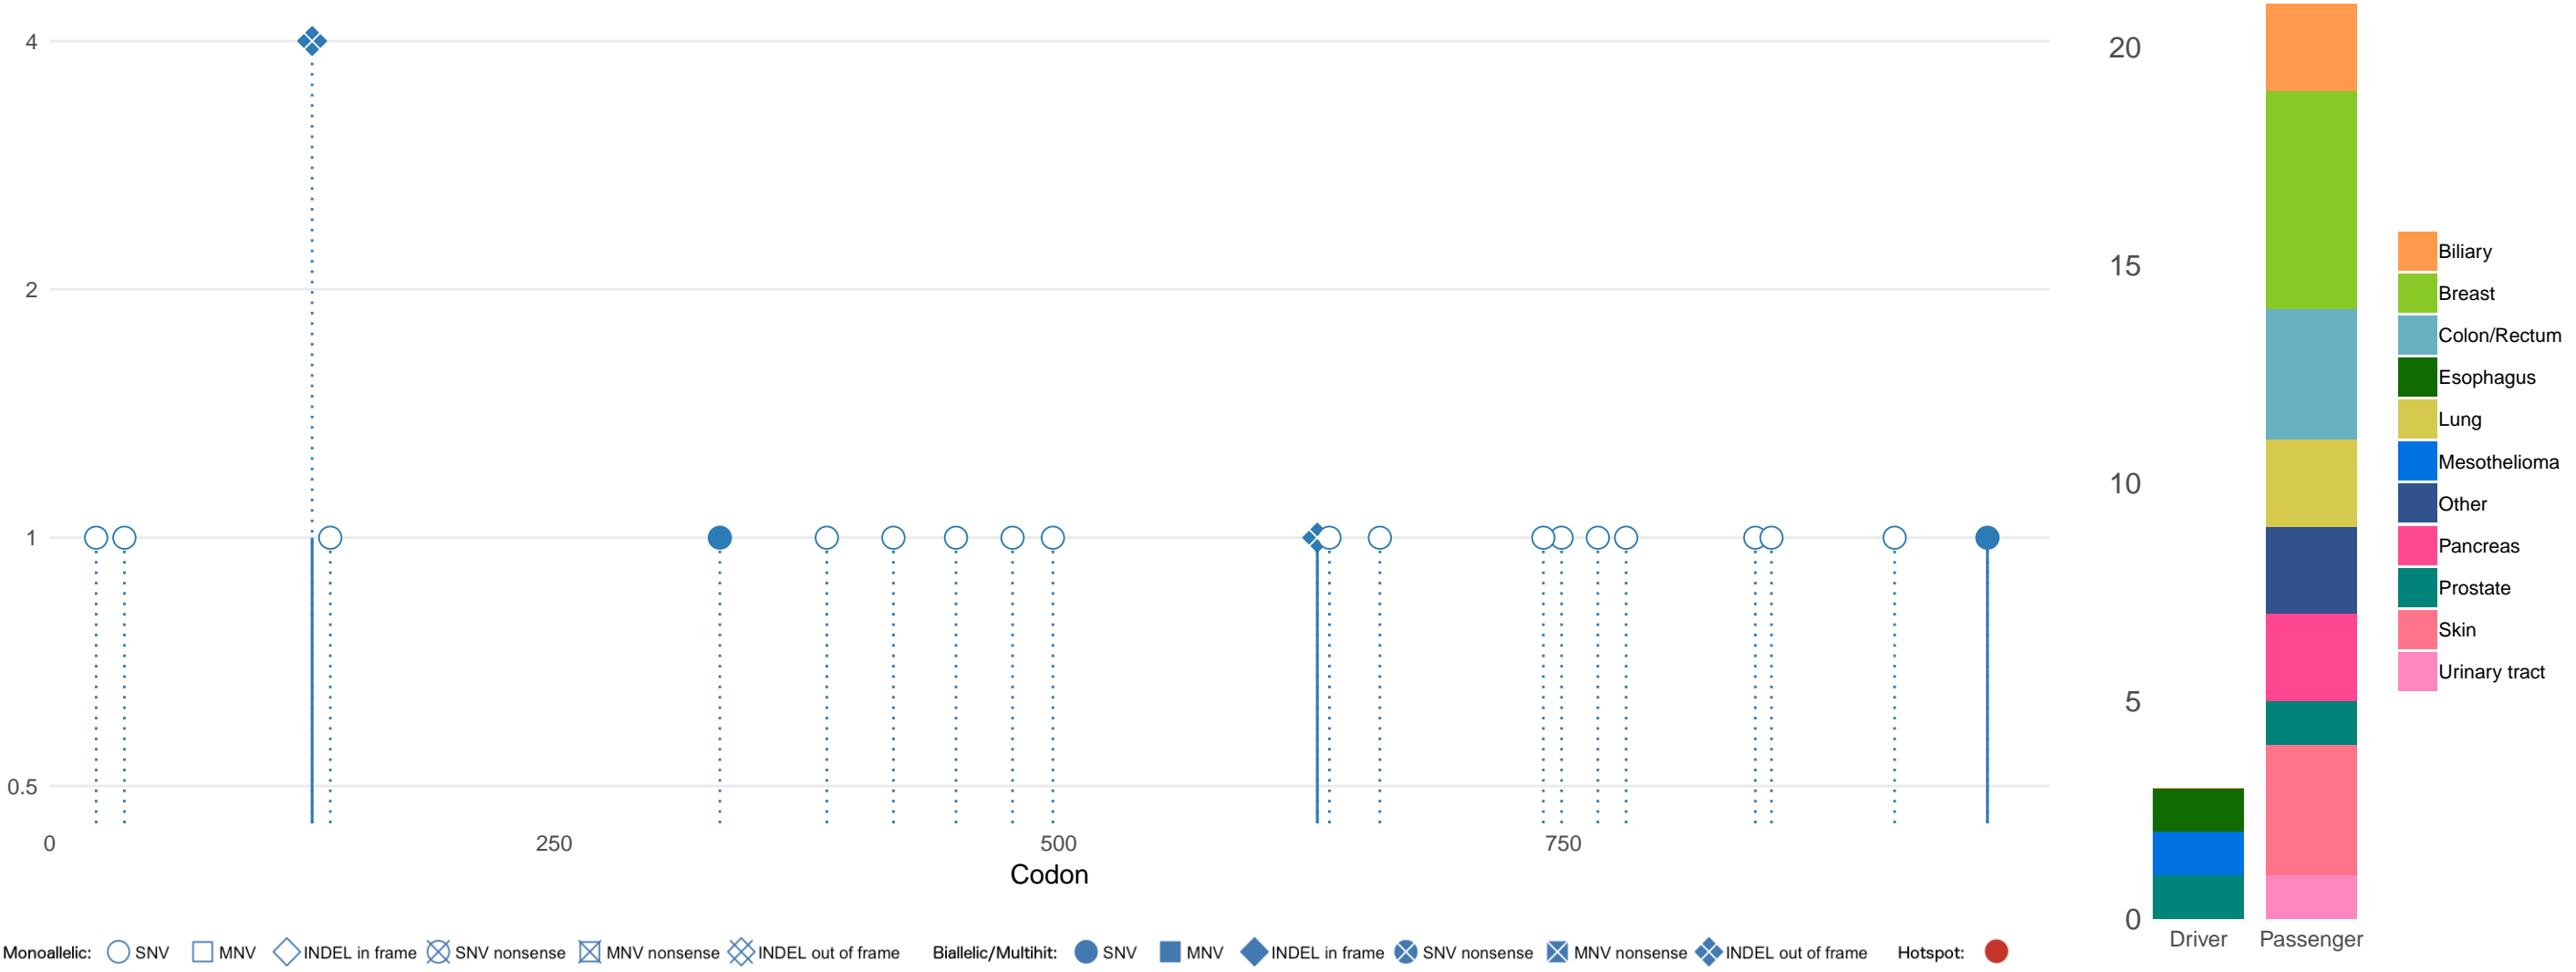

# EP300 Variants

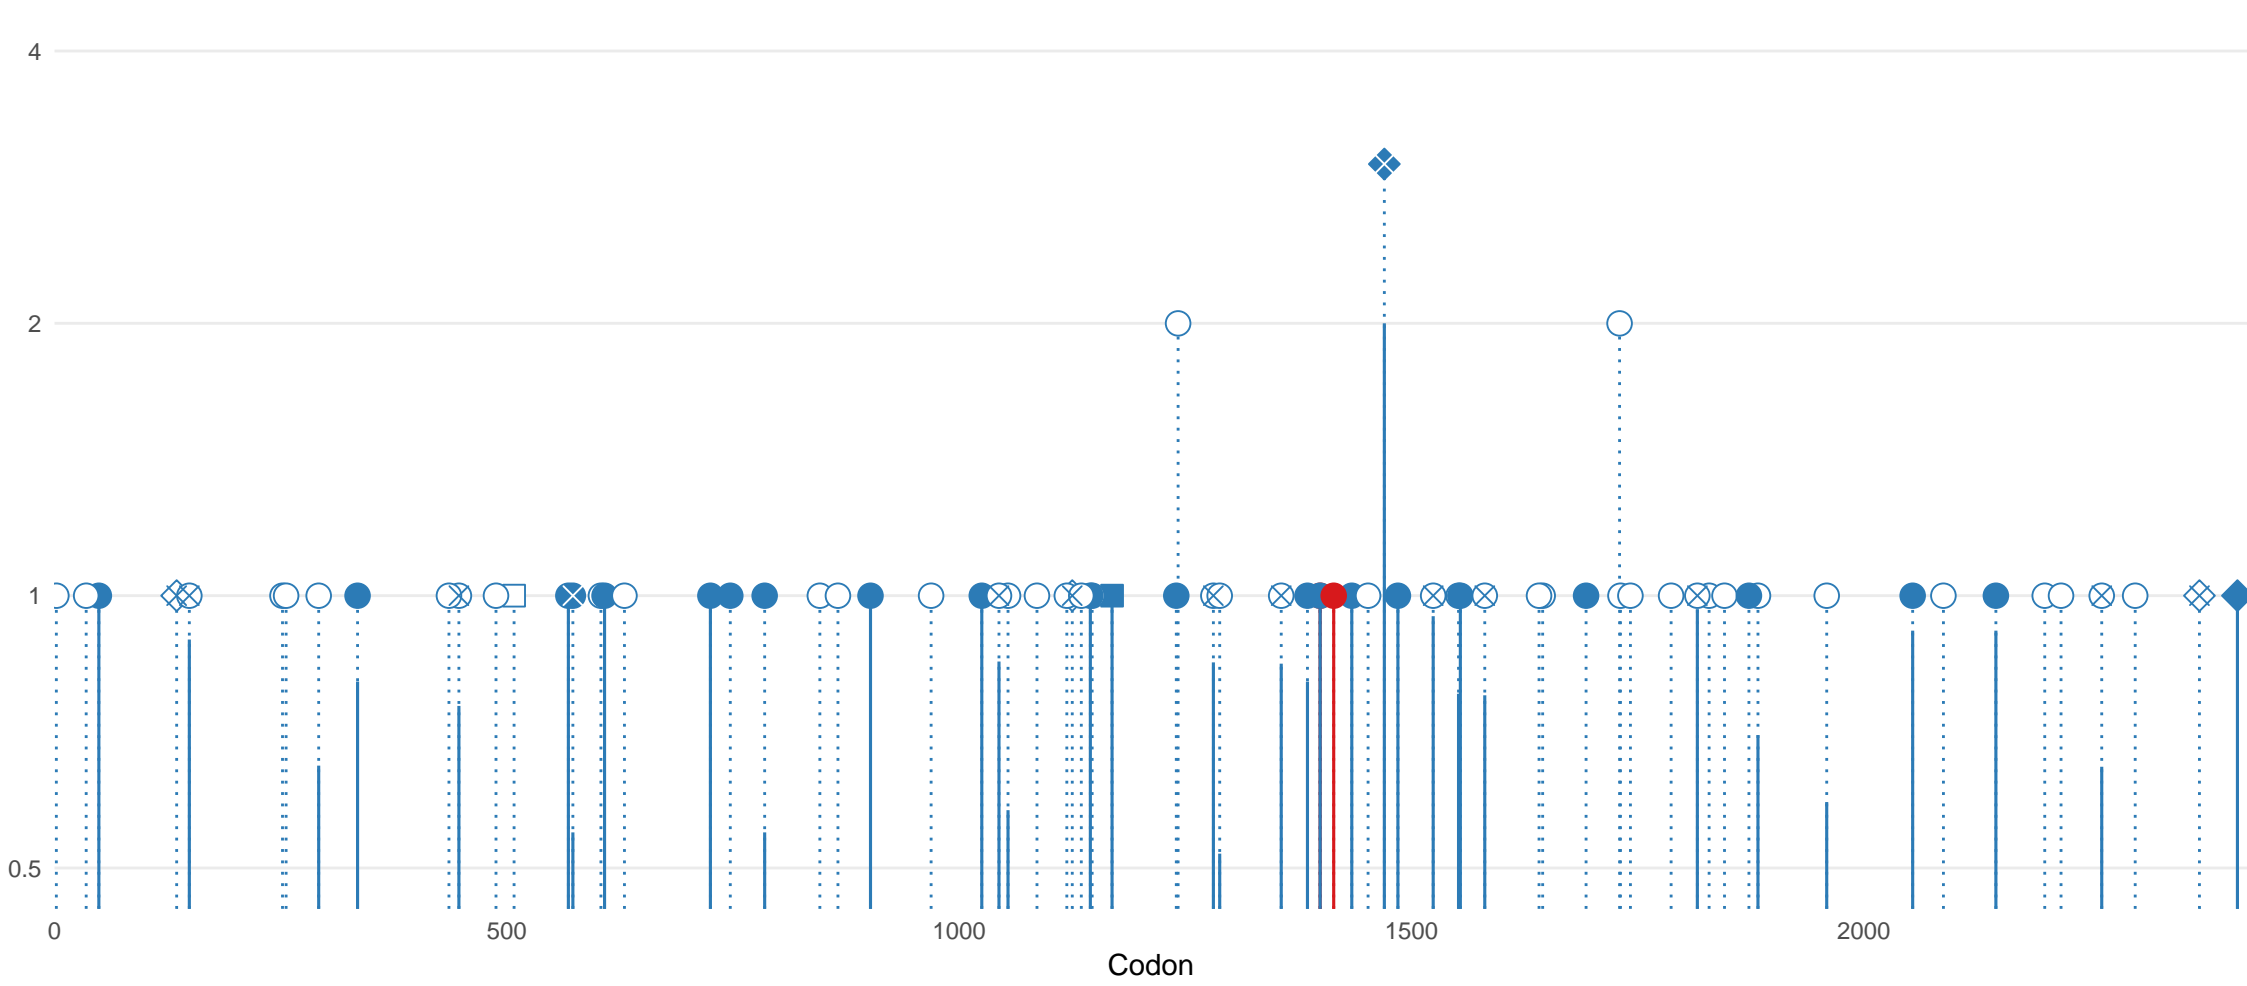

**Monoallelic:** ○ SNV □ MNV ◇ INDEL in frame ⊗ SNV nonsense ⊗ MNV nonsense ⊗ INDEL out of frame  
**Biallelic/Multihit:** ● SNV ■ MNV ◆ INDEL in frame ⊗ SNV nonsense ⊗ MNV nonsense ◆ INDEL out of frame  
**Hotspot:** ●

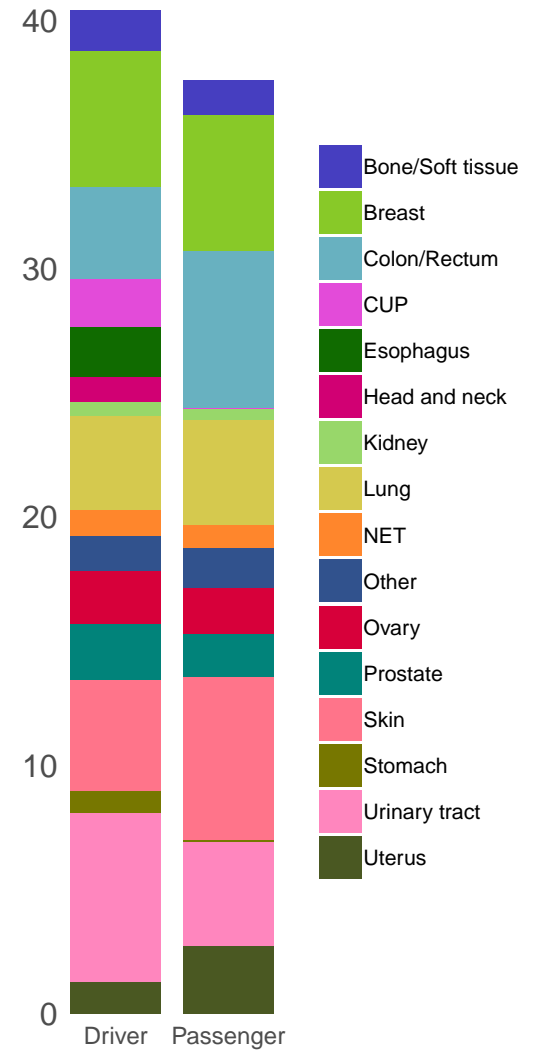

Driver Passenger

# EPHA2 Variants

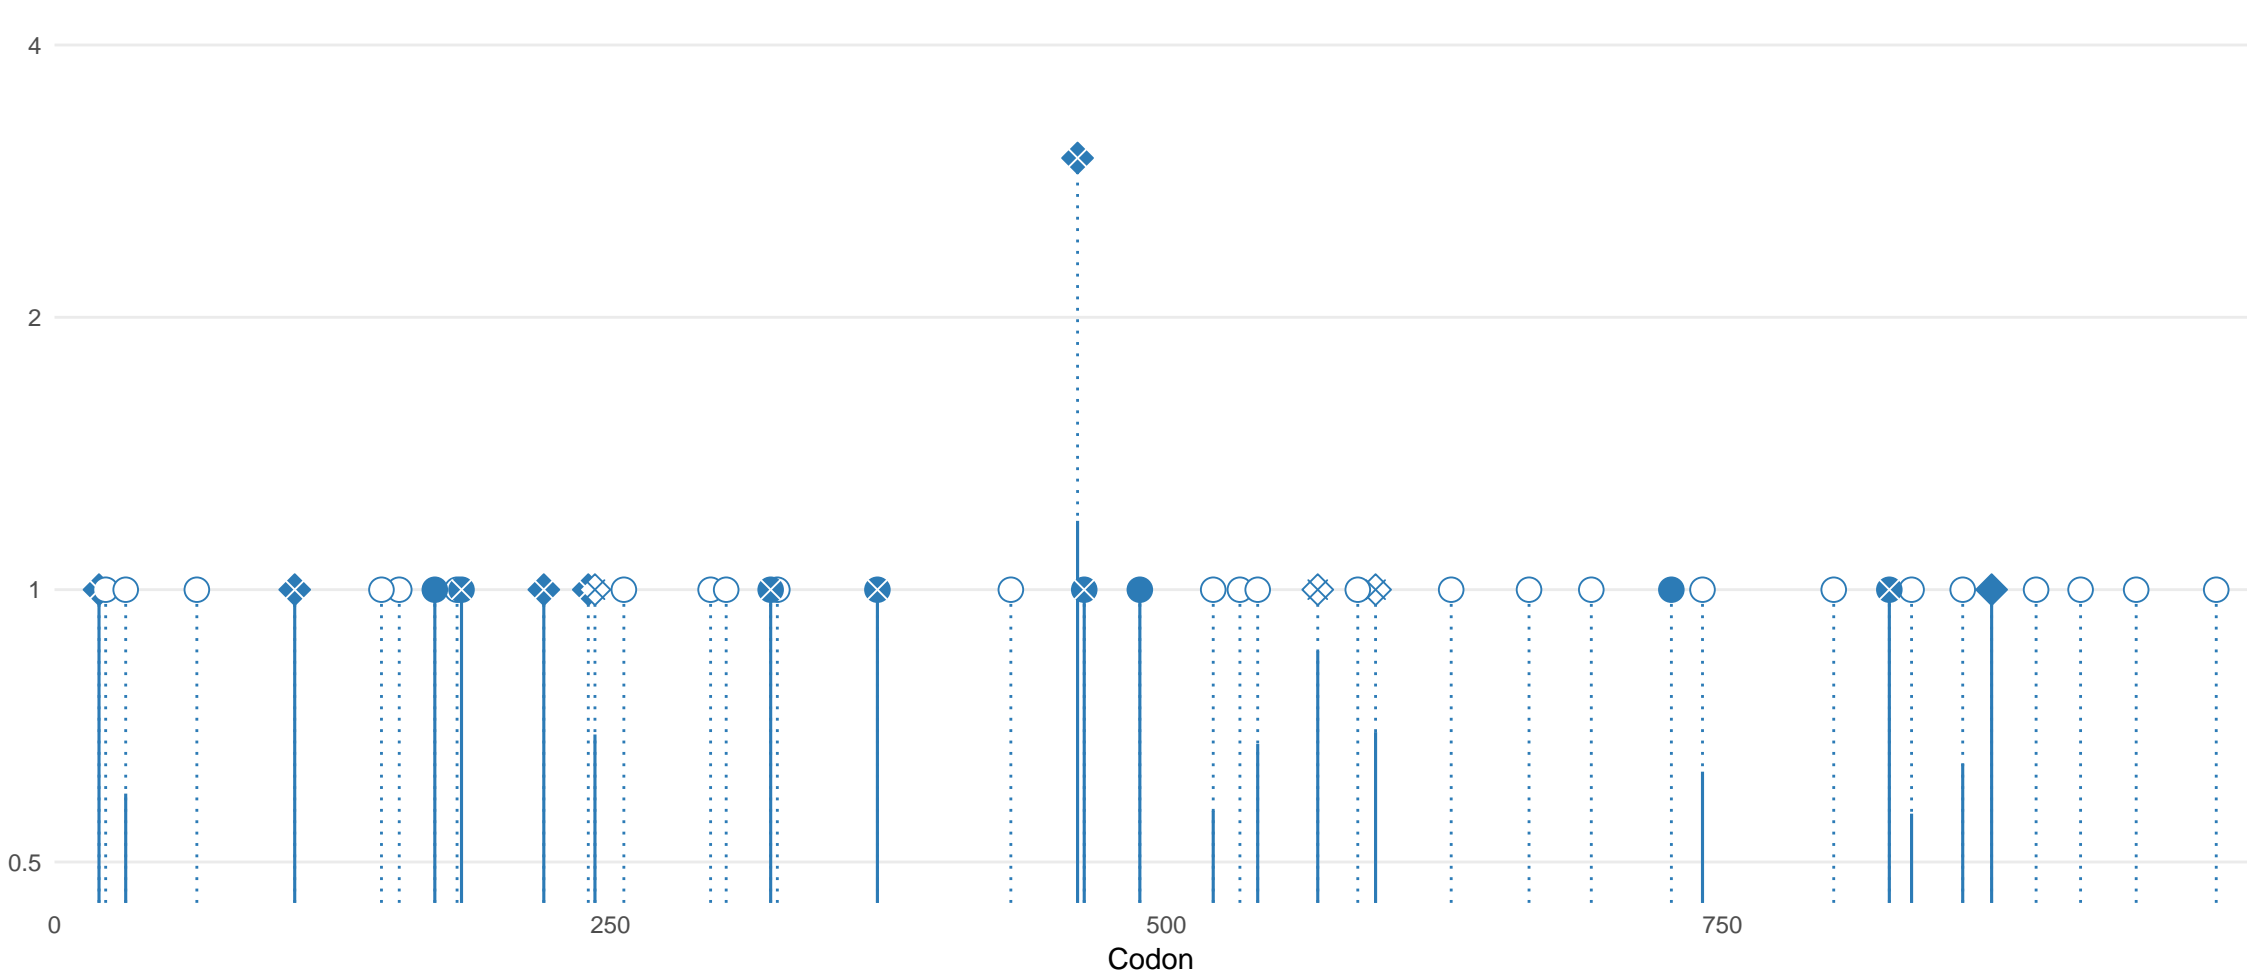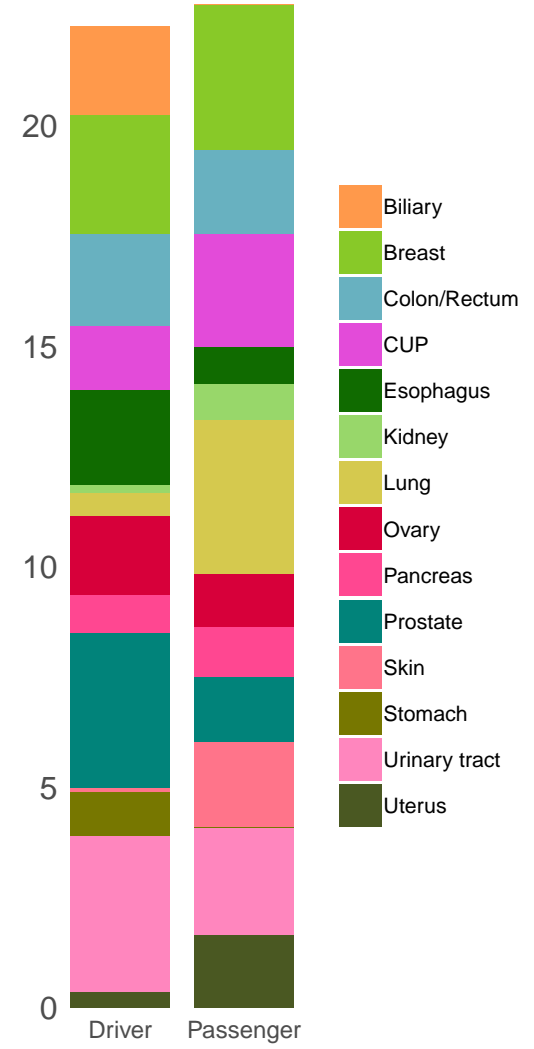

# ERBB4 Variants

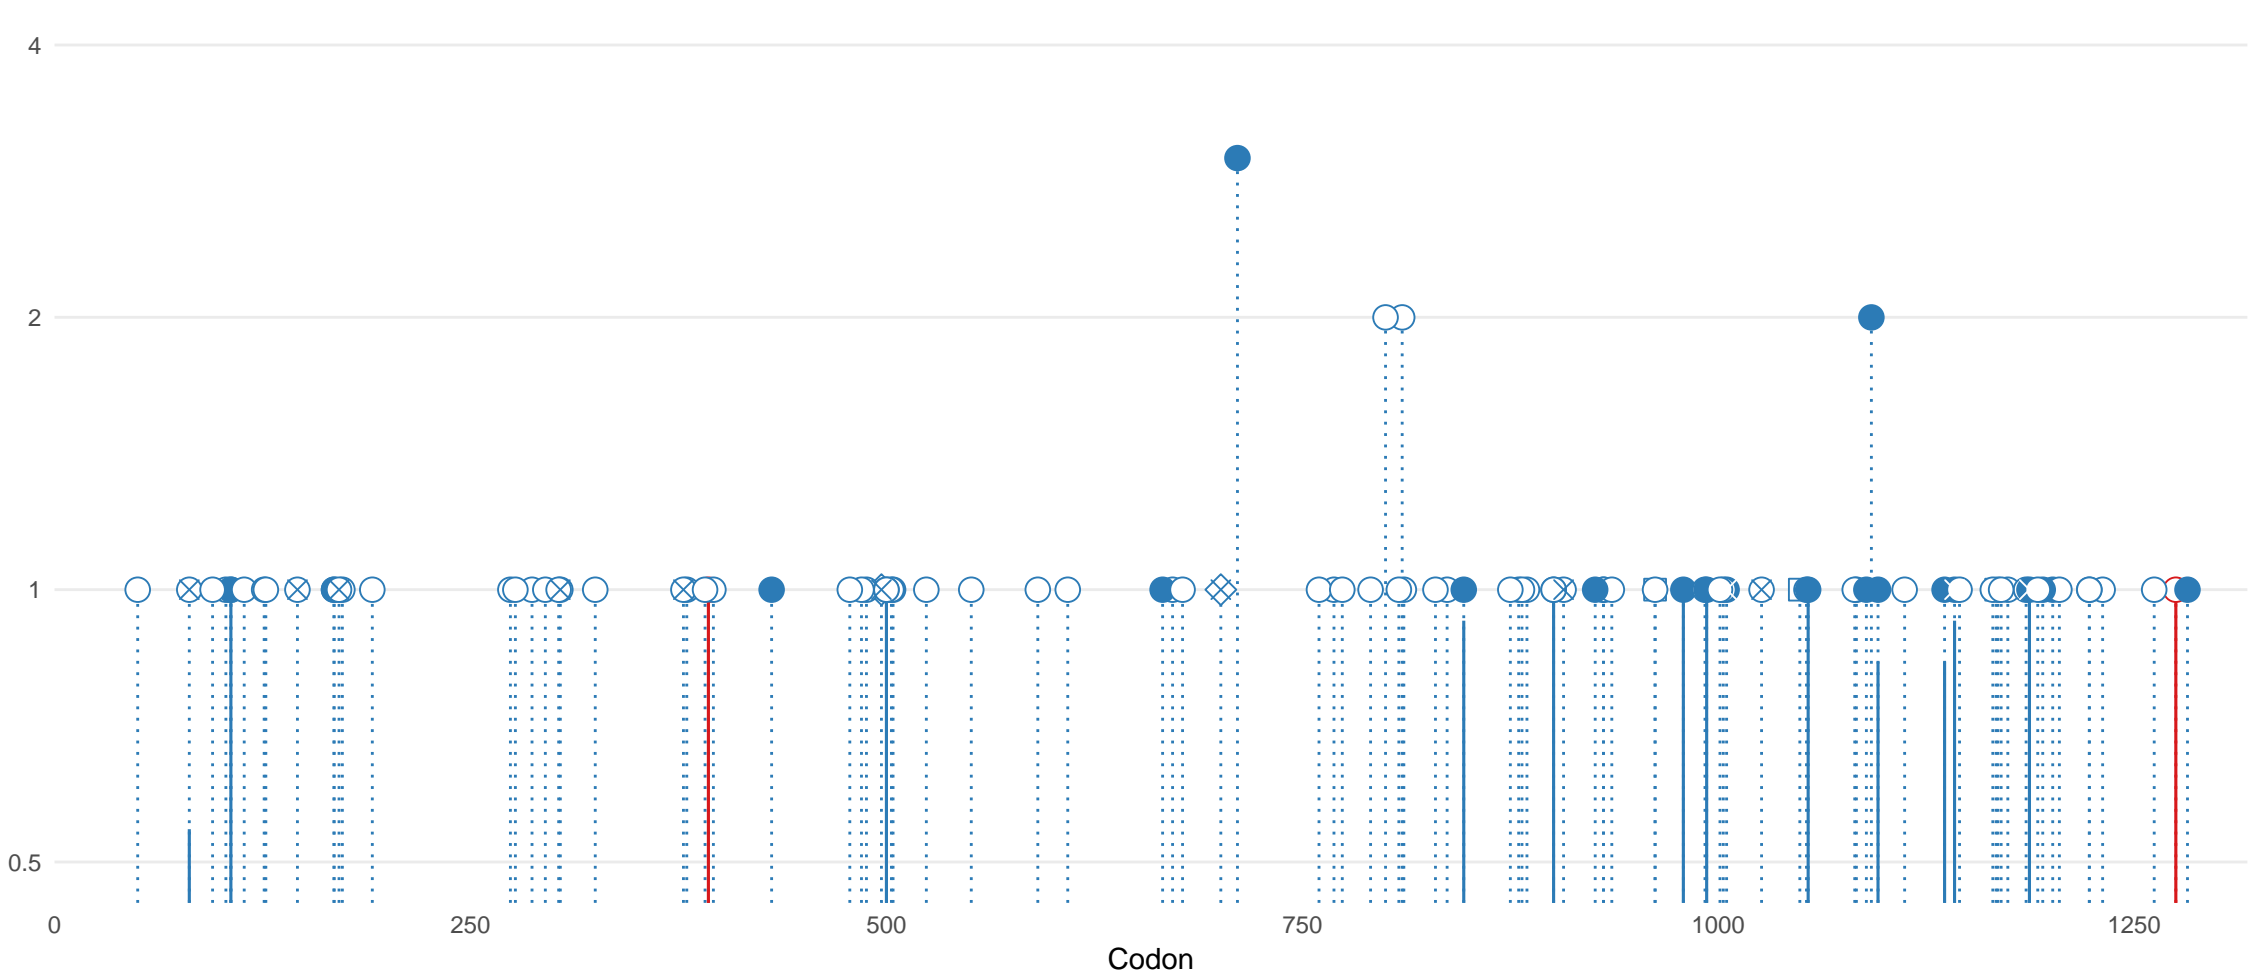

**Monoallelic:** ○ SNV □ MNV ◇ INDEL in frame ⊗ SNV nonsense ⊗ MNV nonsense ⊗ INDEL out of frame  
**Biallelic/Multihit:** ● SNV ■ MNV ◆ INDEL in frame ⊗ SNV nonsense ⊗ MNV nonsense ◆ INDEL out of frame  
**Hotspot:** ●

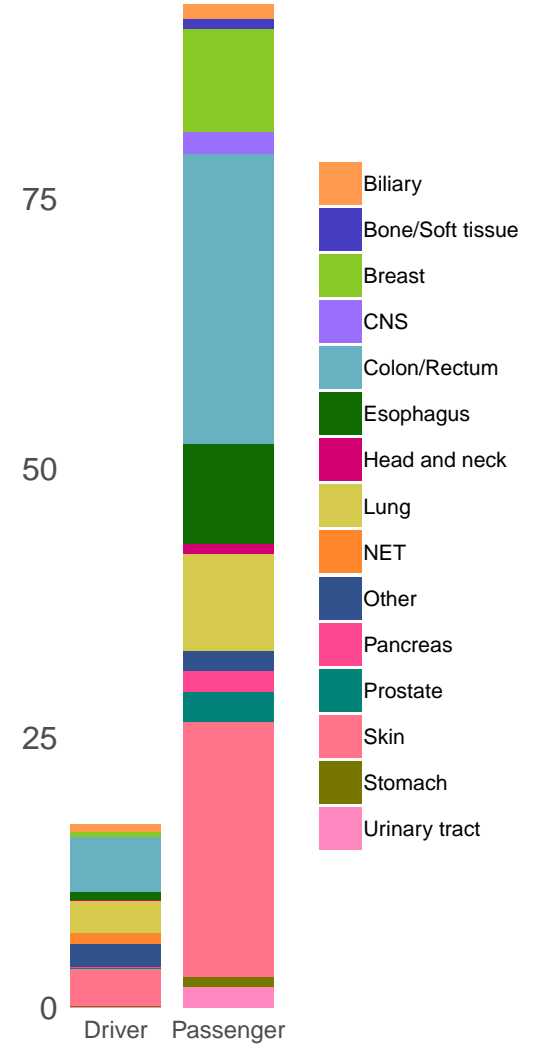

# ETNK1 Variants

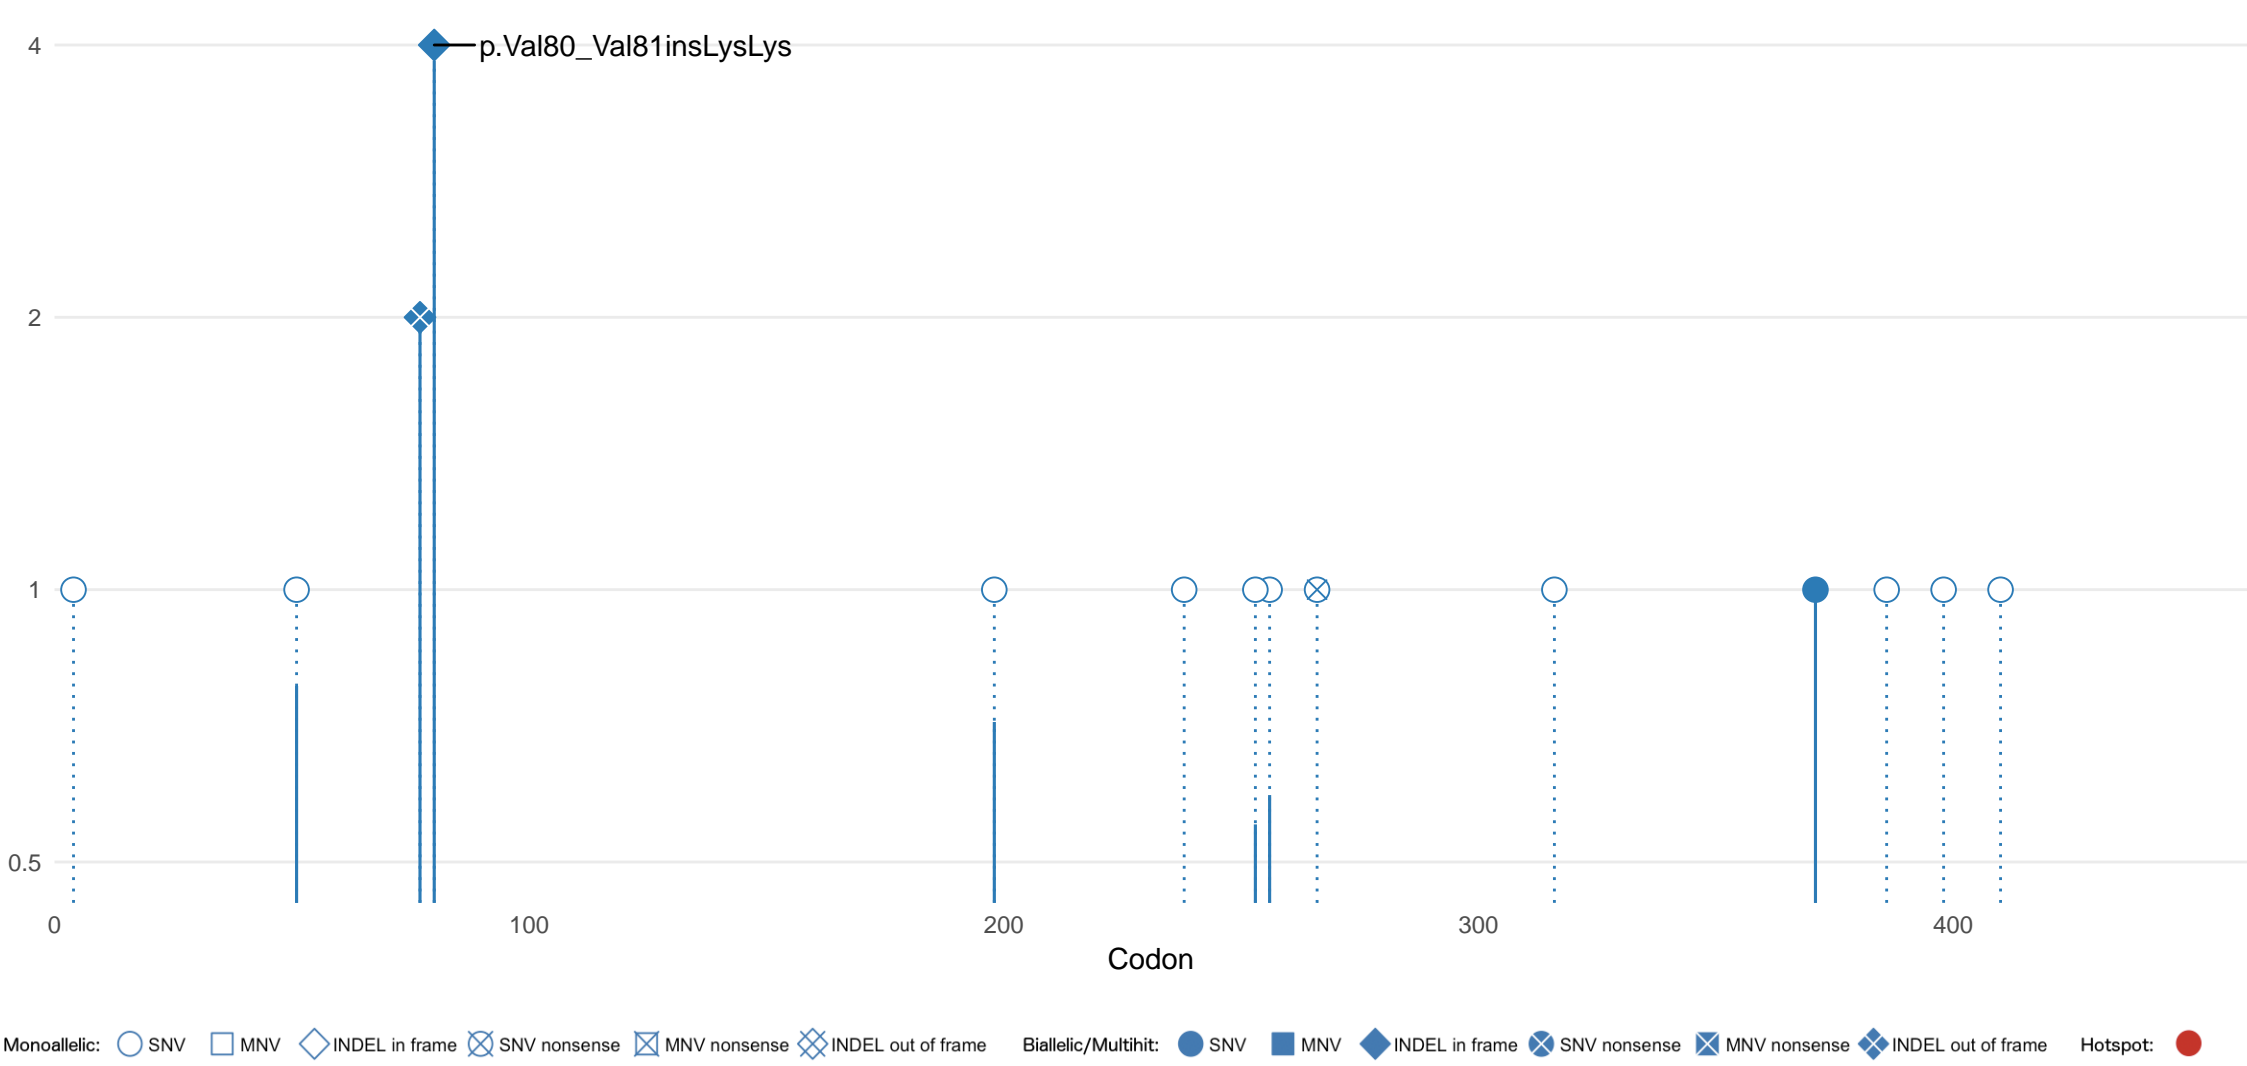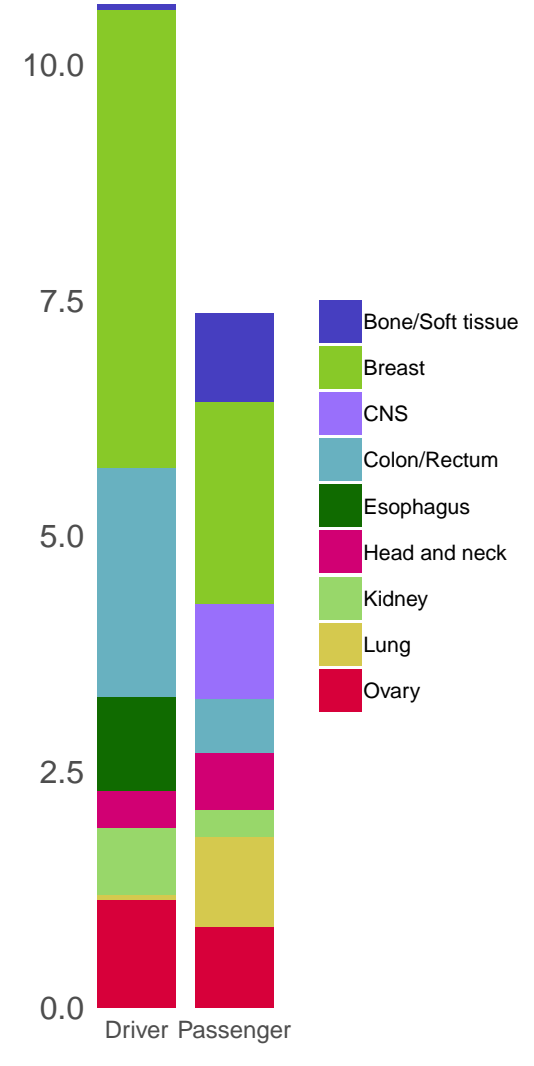

# EZH2 Variants

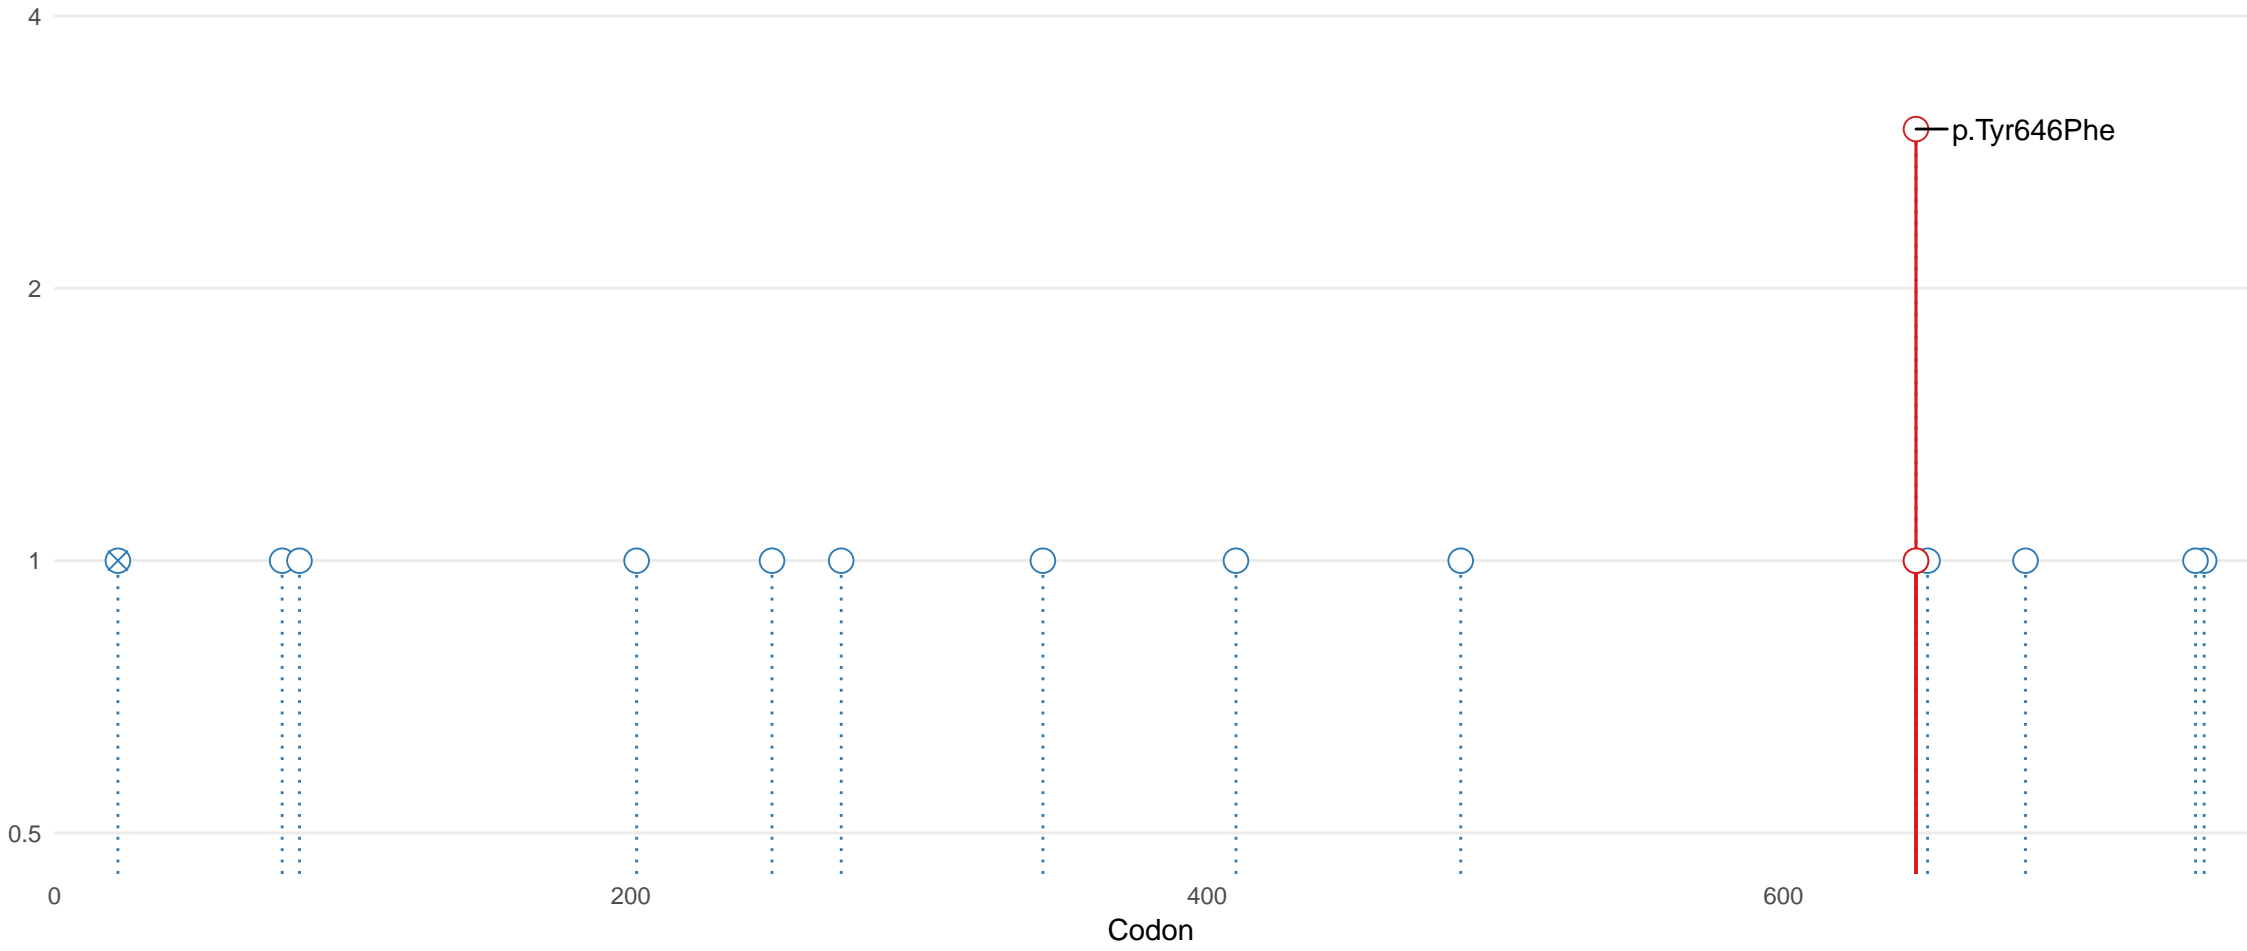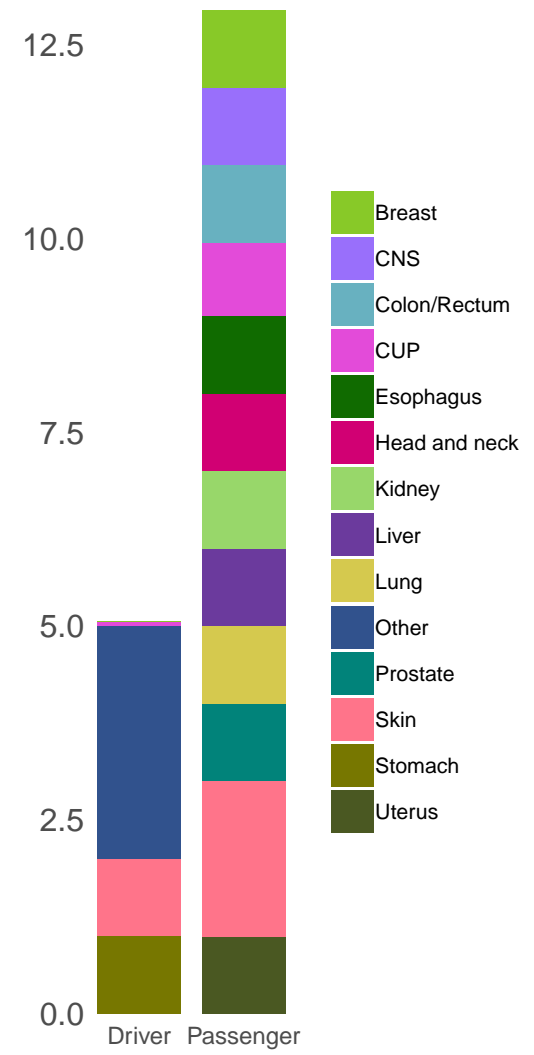

Monoallelic: ○ SNV □ MNV ◇ INDEL in frame ⊗ SNV nonsense ⊗ MNV nonsense ⊗ INDEL out of frame  
 Biallelic/Multihit: ● SNV ■ MNV ◆ INDEL in frame ⊗ SNV nonsense ⊗ MNV nonsense ◆ INDEL out of frame  
 Hotspot: ●



# FAT1 Variants

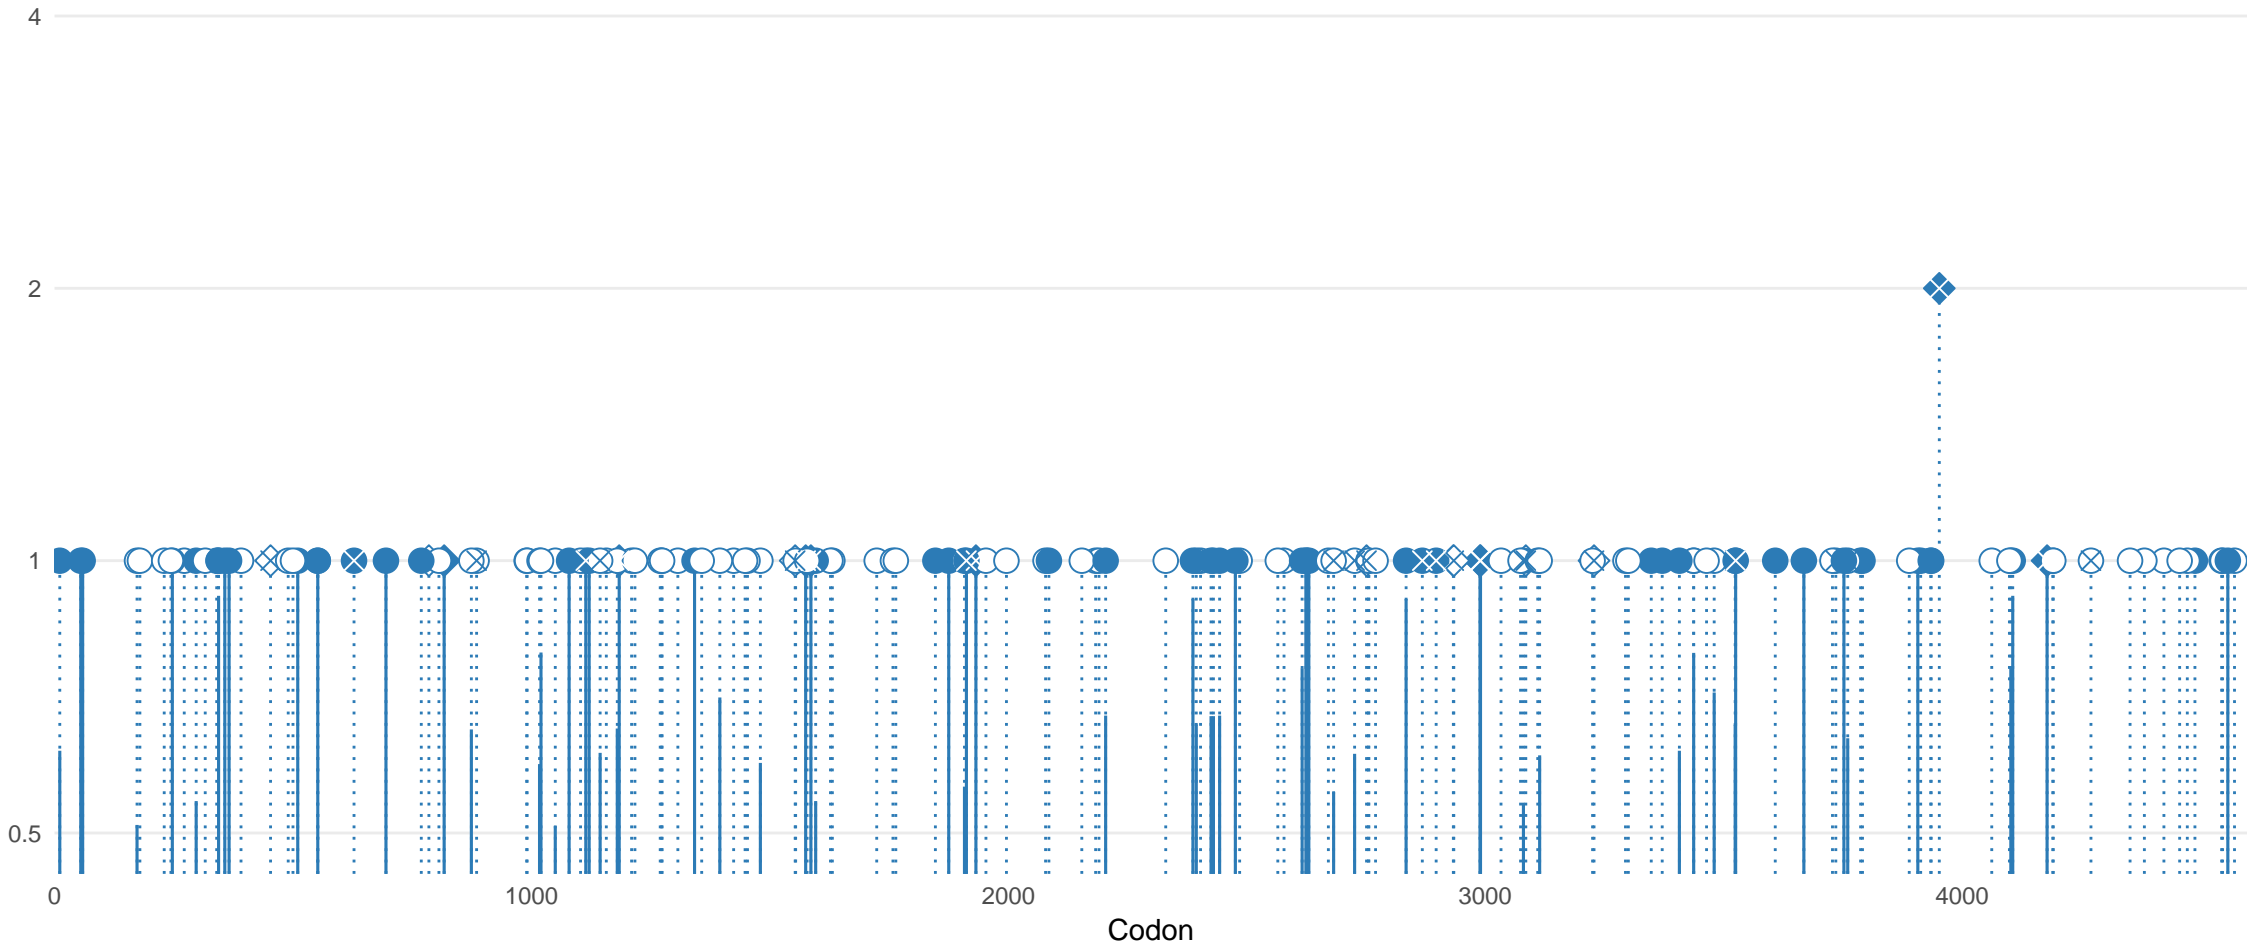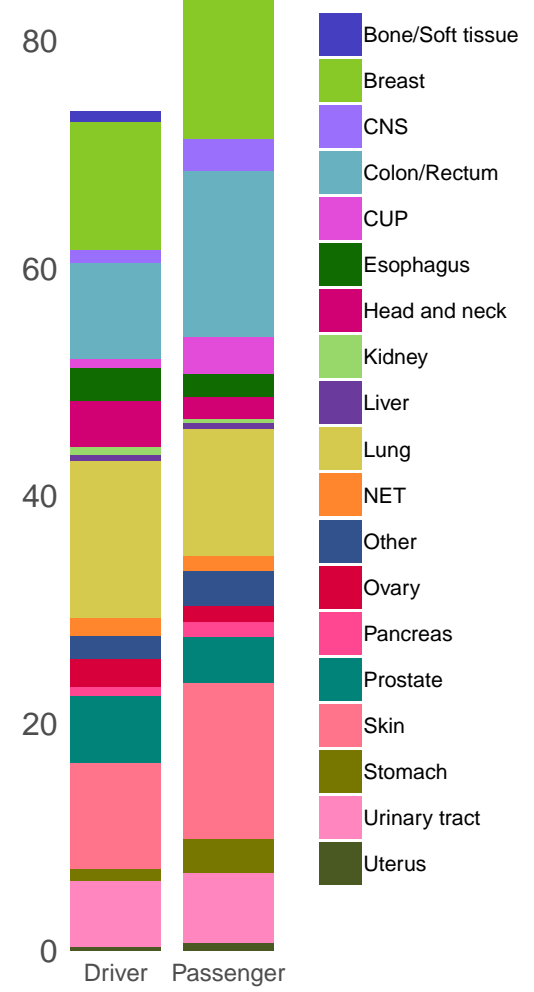

**Monoallelic:** ○ SNV □ MNV ◇ INDEL in frame ⊗ SNV nonsense ⊗ MNV nonsense ⊗ INDEL out of frame  
**Biallelic/Multihit:** ● SNV ■ MNV ◆ INDEL in frame ⊗ SNV nonsense ⊗ MNV nonsense ◆ INDEL out of frame  
**Hotspot:** ●

# FAT4 Variants

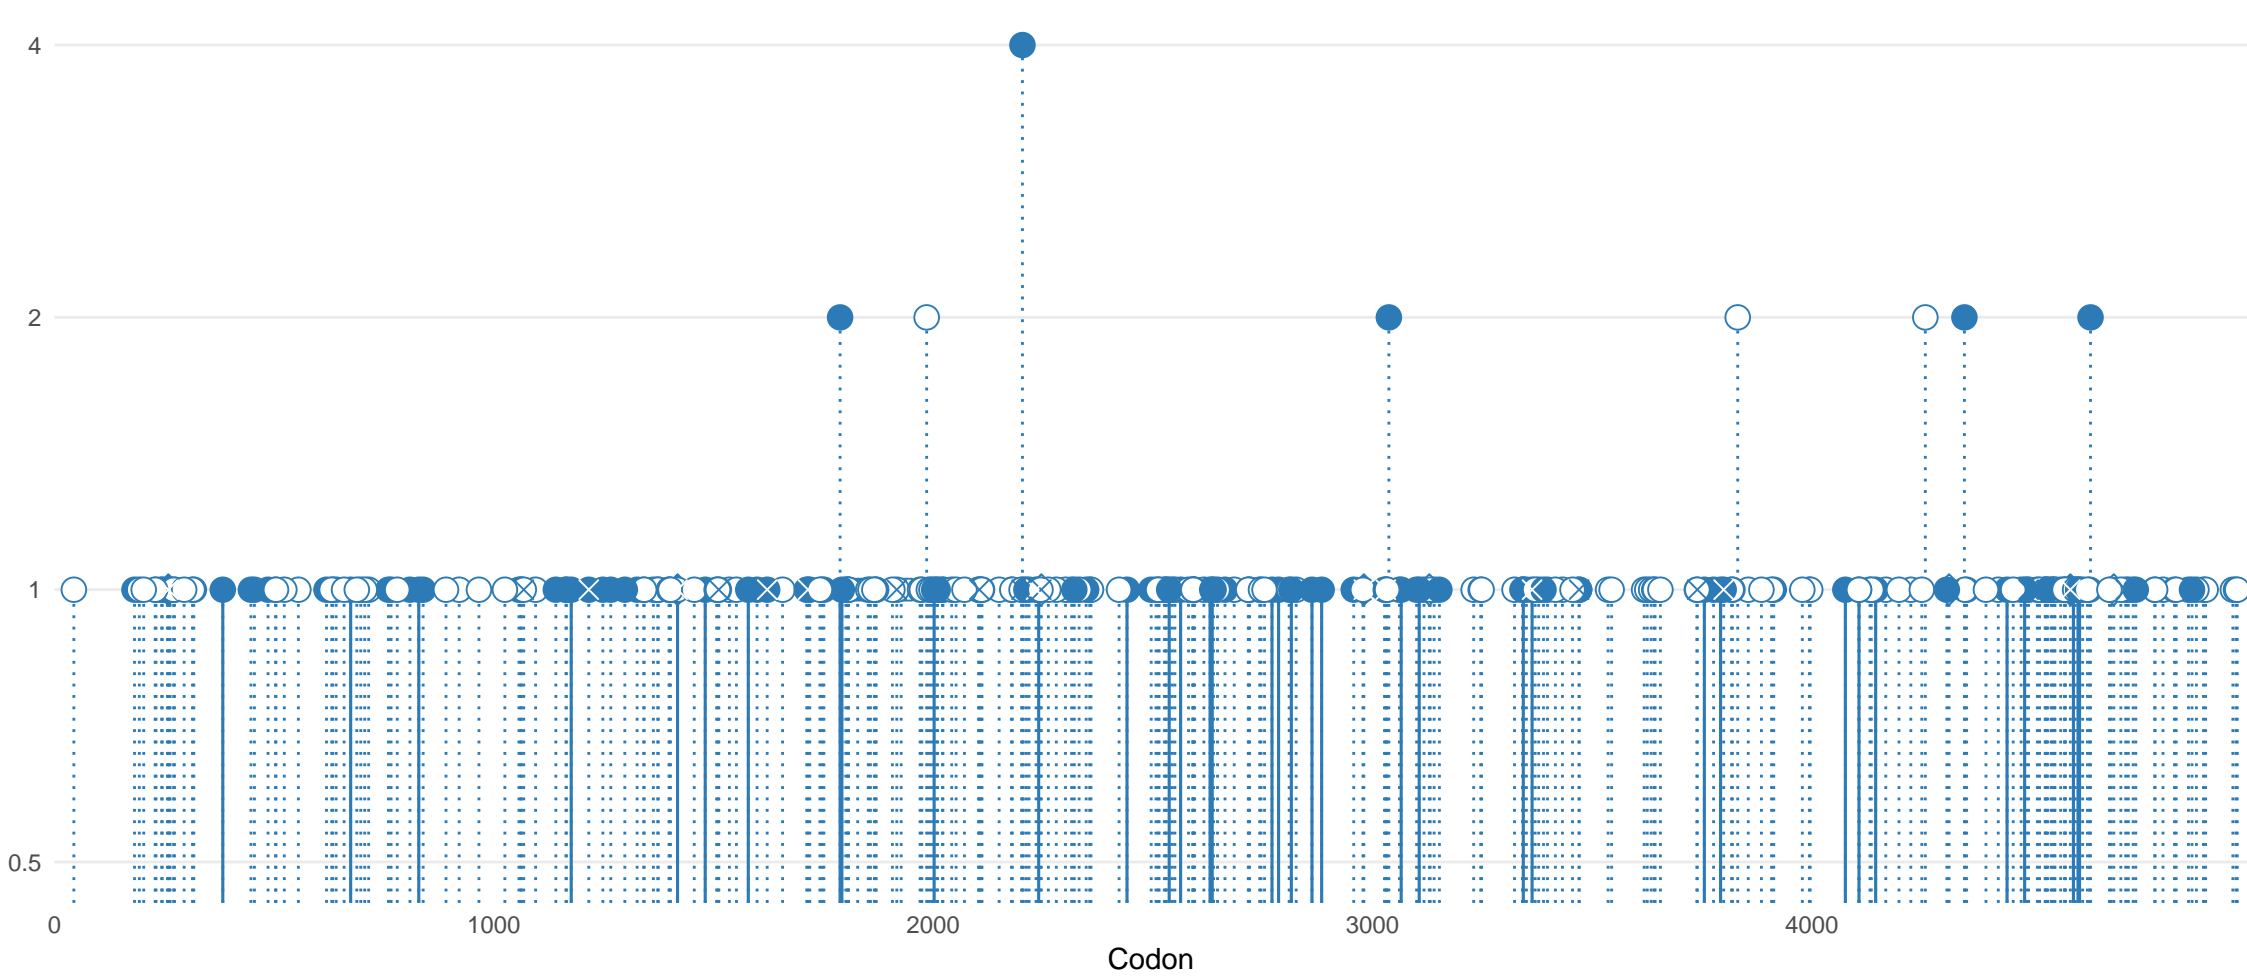

Monoallelic: ○ SNV □ MNV ◇ INDEL in frame ⊗ SNV nonsense ⊗ MNV nonsense ⊗ INDEL out of frame  
 Biallelic/Multihit: ● SNV ■ MNV ◆ INDEL in frame ⊗ SNV nonsense ⊗ MNV nonsense ◆ INDEL out of frame  
 Hotspot: ●

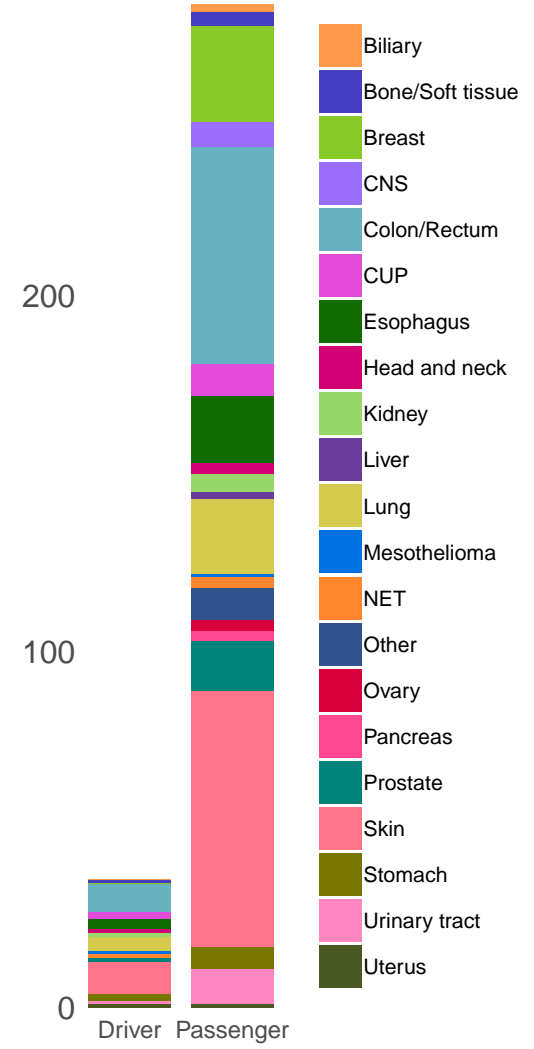

# FBXO11 Variants

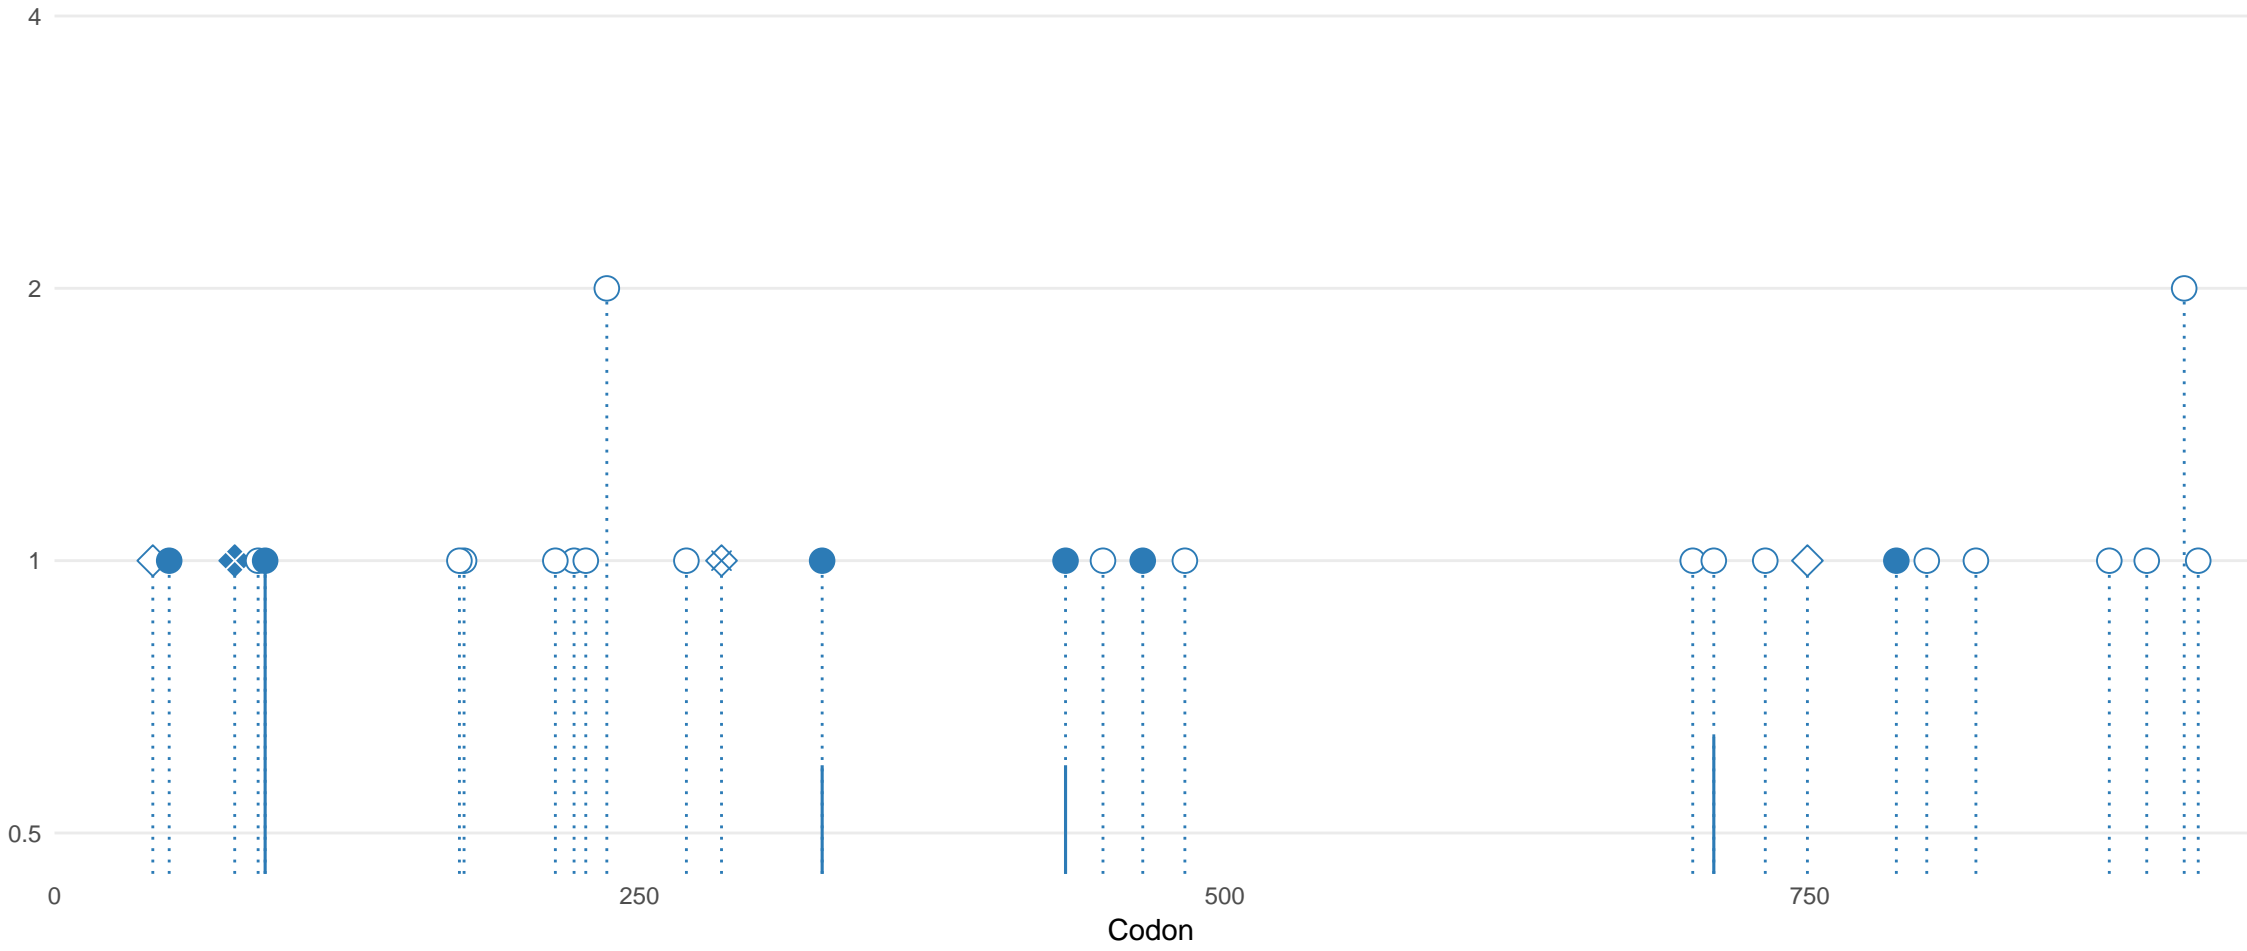

Monoallelic: ○ SNV □ MNV ◇ INDEL in frame ⊗ SNV nonsense ⊗ MNV nonsense ⊗ INDEL out of frame  
 Biallelic/Multihit: ● SNV ■ MNV ◆ INDEL in frame ⊗ SNV nonsense ⊗ MNV nonsense ◆ INDEL out of frame  
 Hotspot: ●

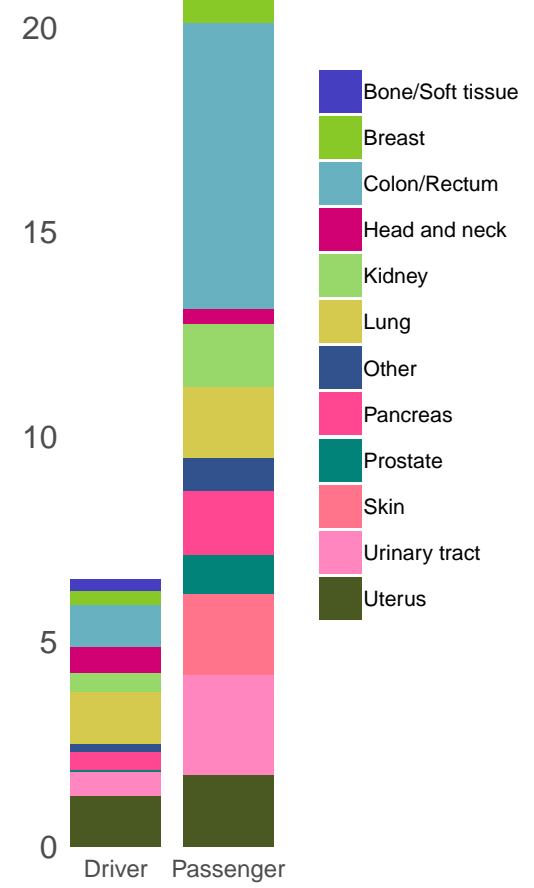

# FBXW7 Variants

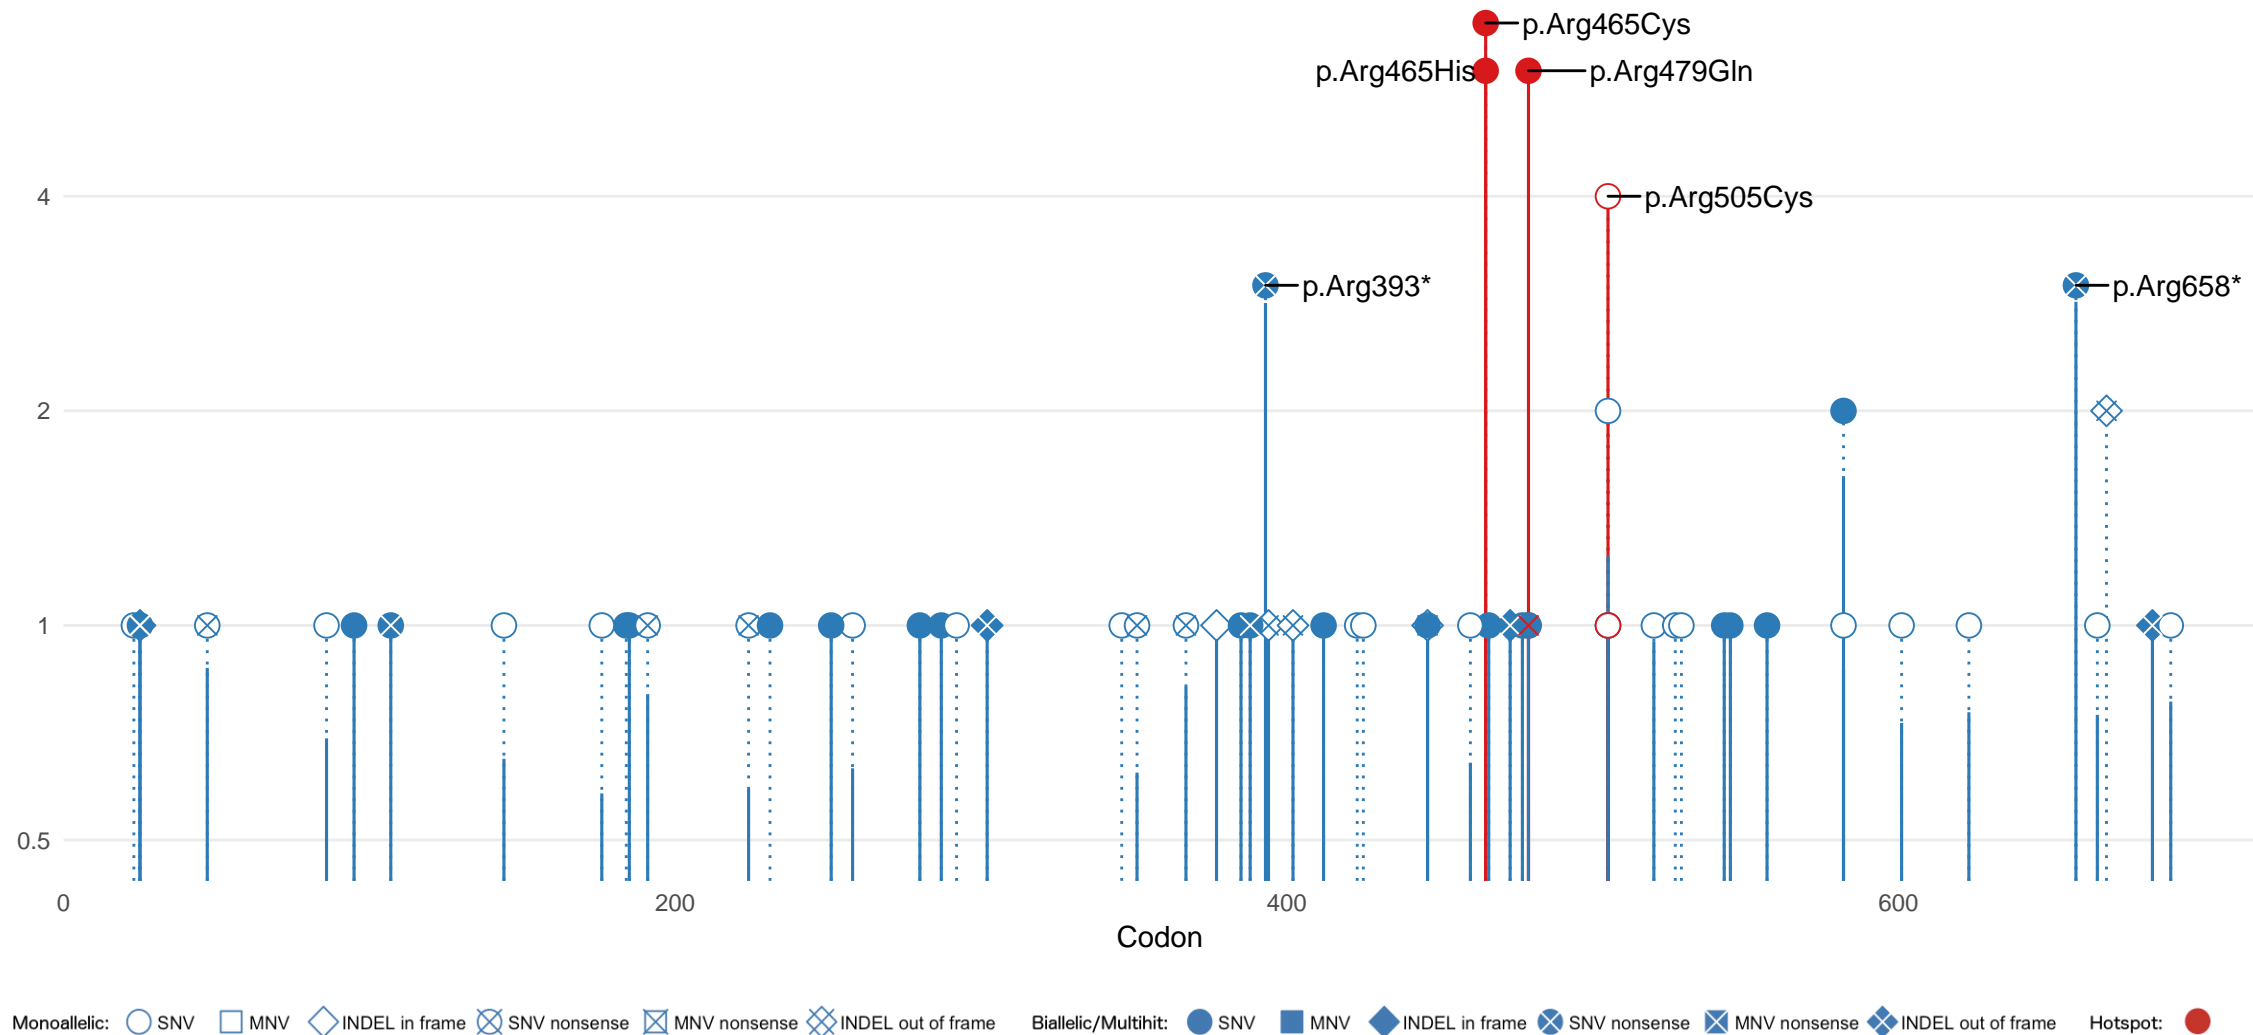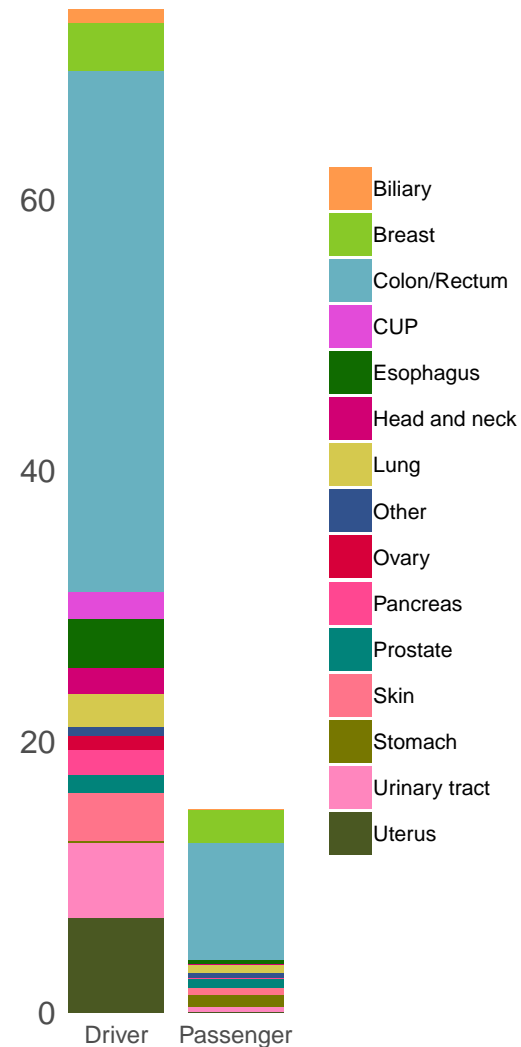

# FUBP1 Variants

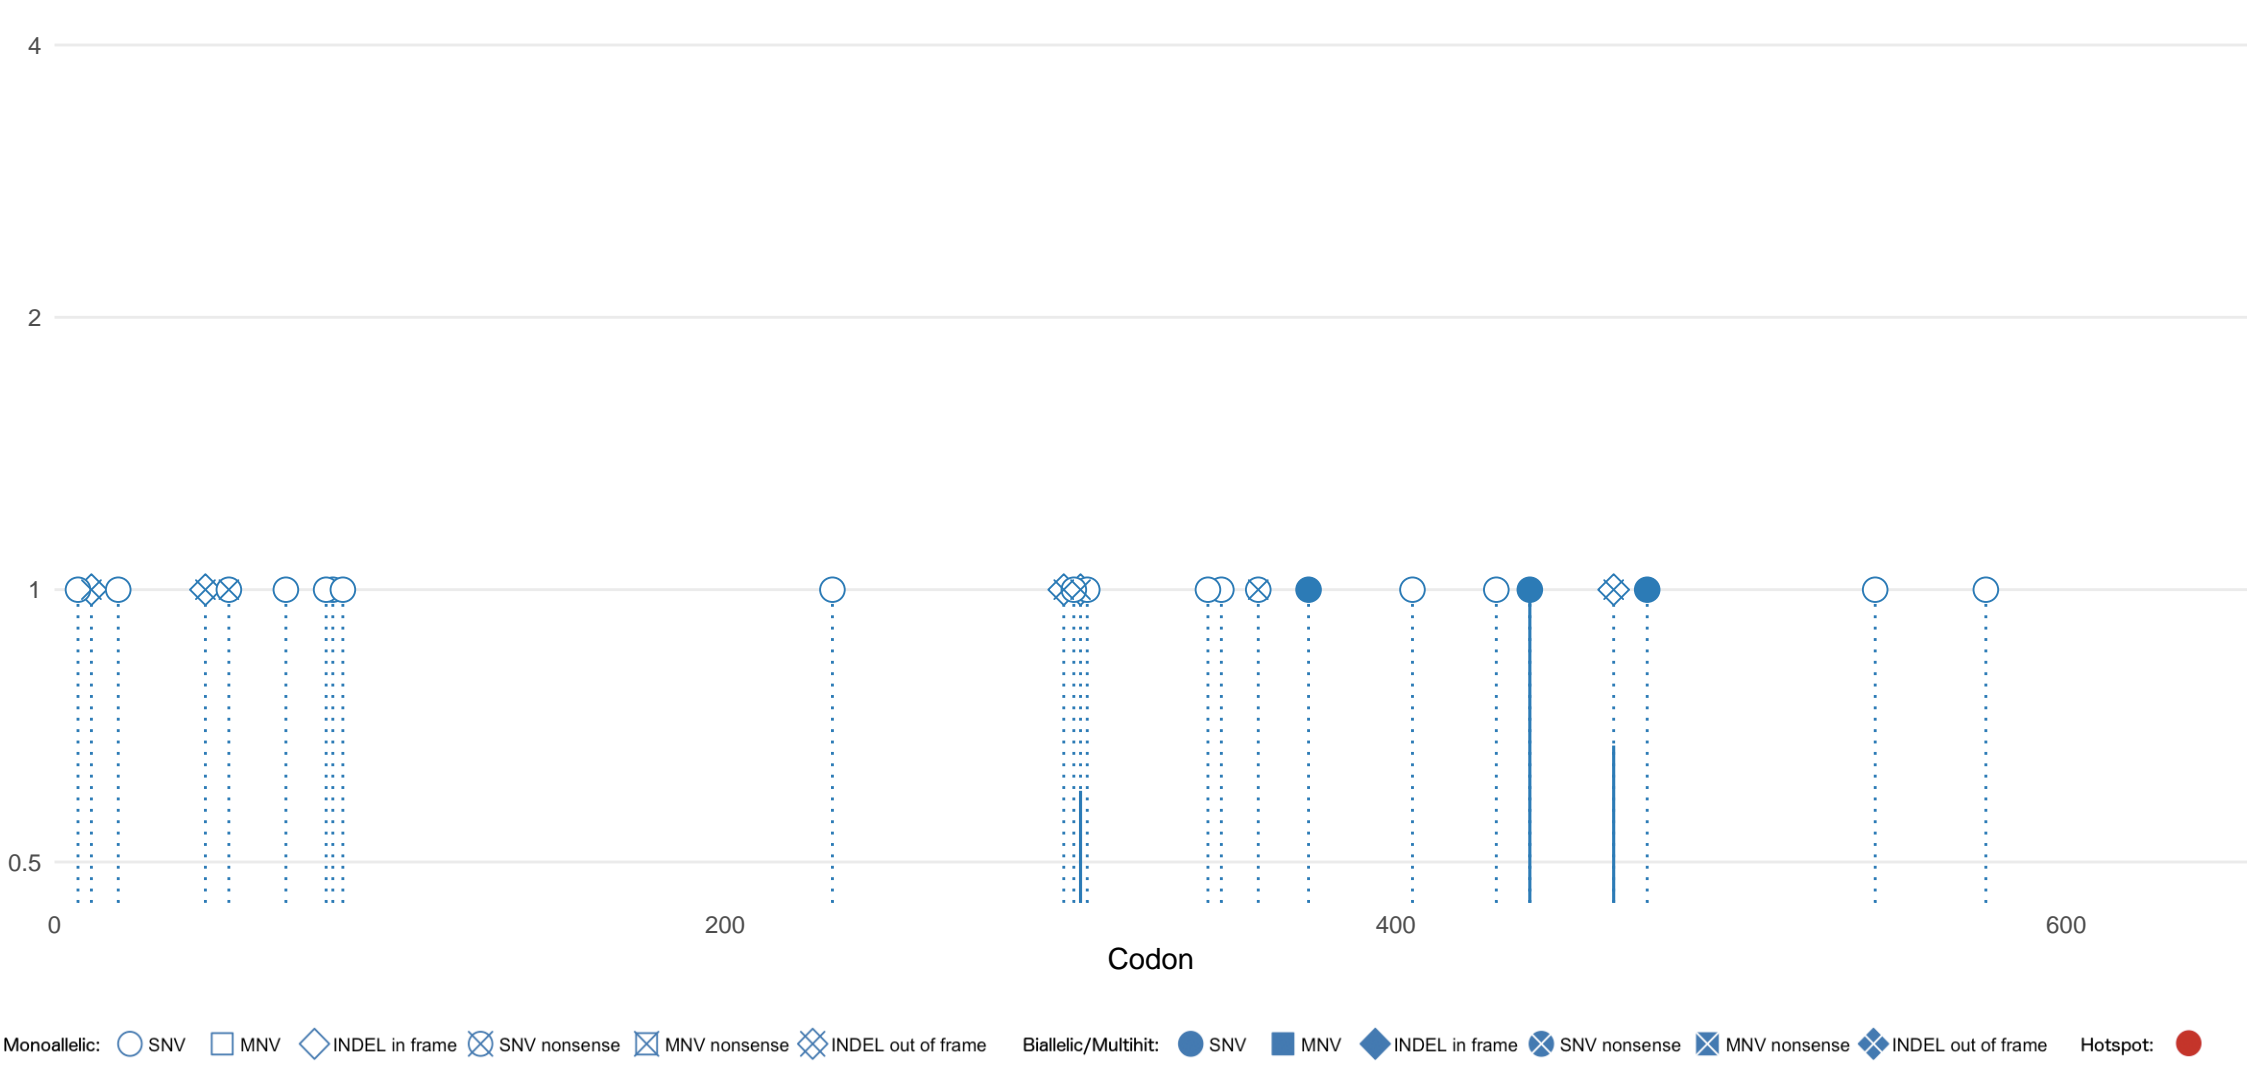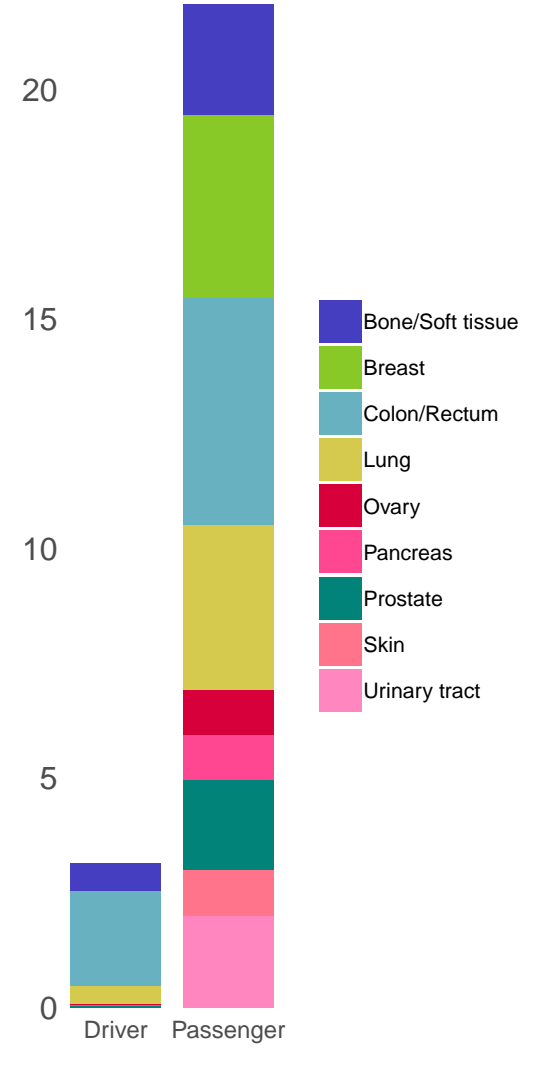

# GATA1 Variants

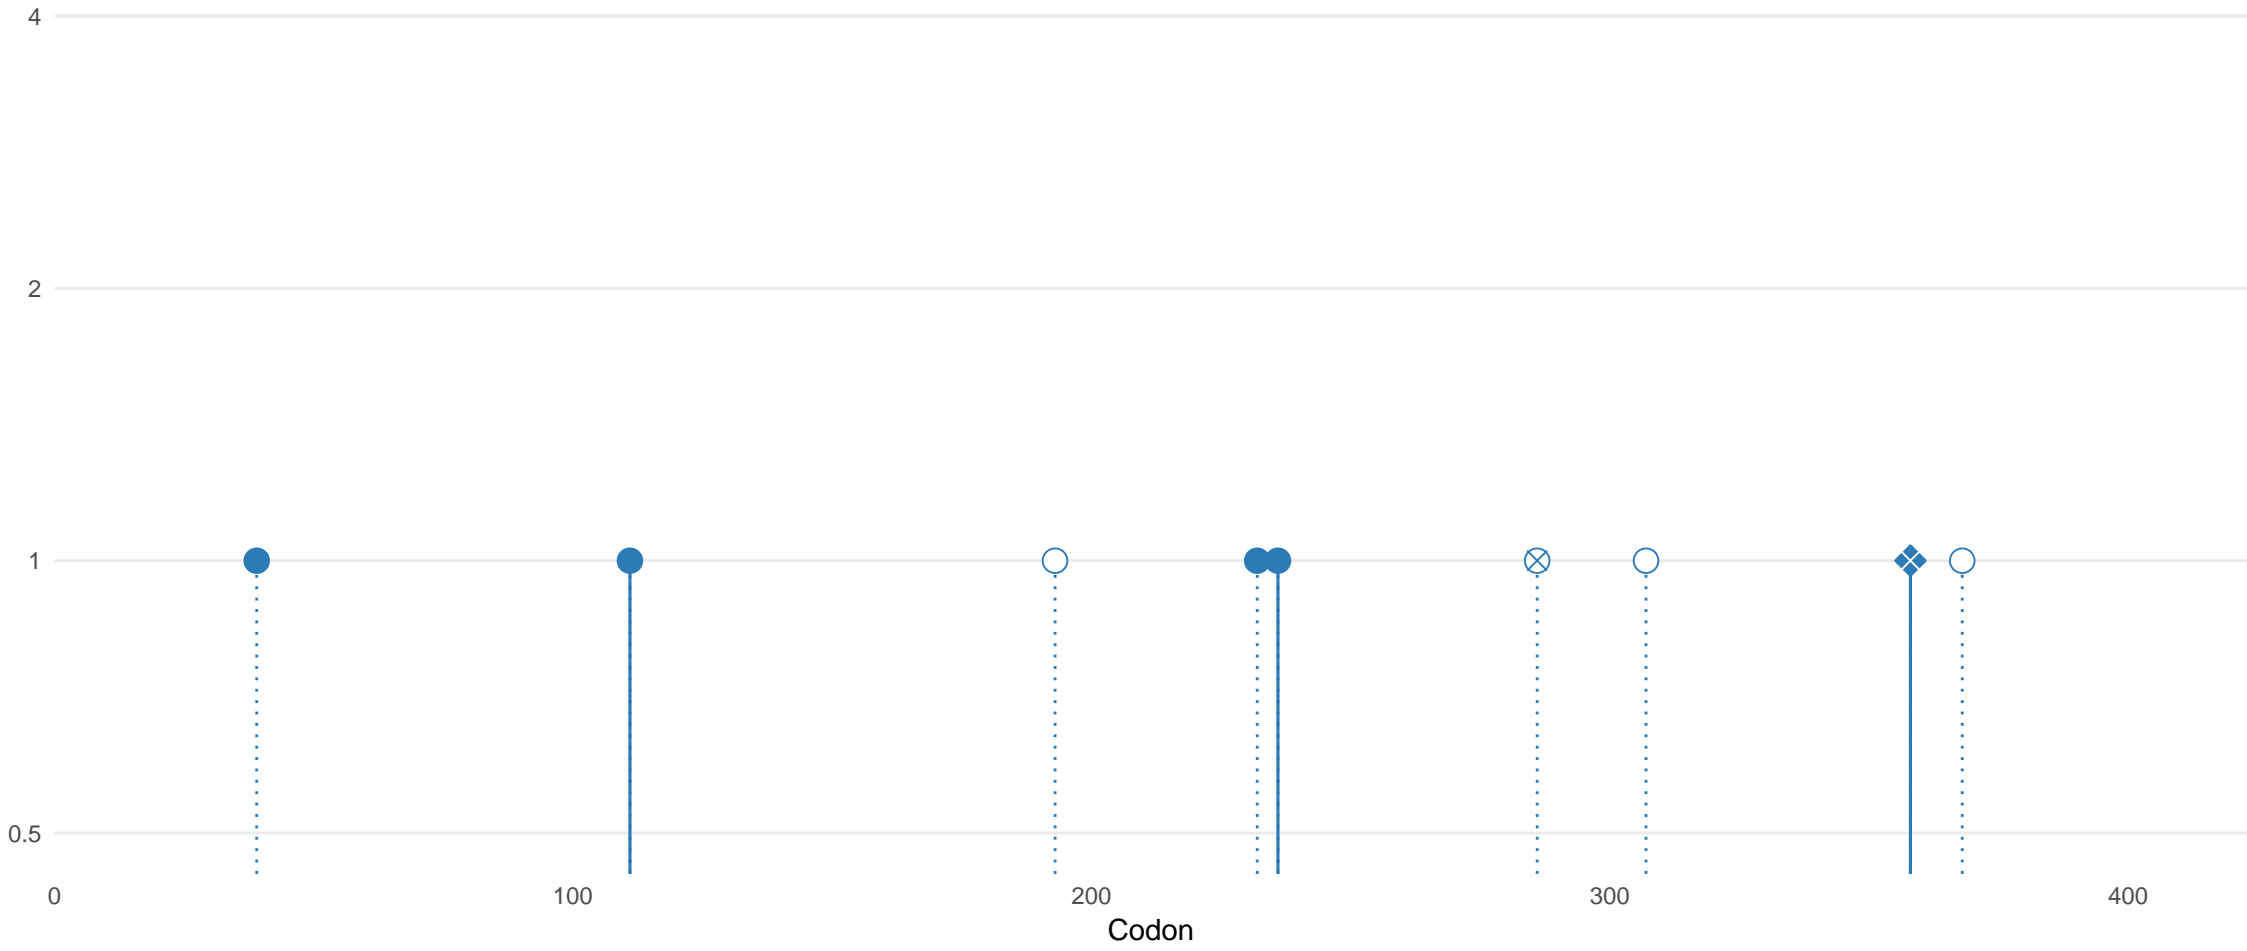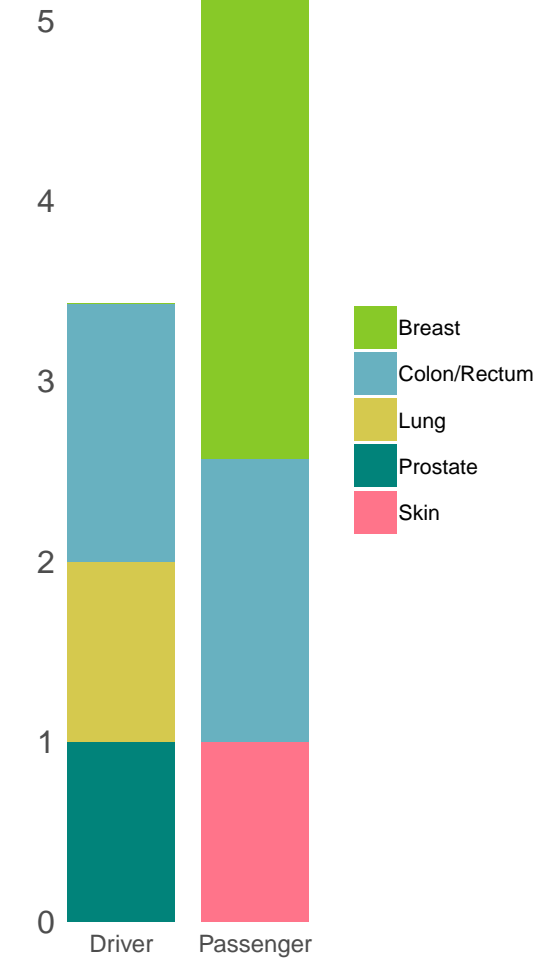

Monoallelic: ○ SNV □ MNV ◇ INDEL in frame ⊗ SNV nonsense ⊗ MNV nonsense ⊗ INDEL out of frame  
 Biallelic/Multi-hit: ● SNV ■ MNV ◆ INDEL in frame ⊗ SNV nonsense ⊗ MNV nonsense ◆ INDEL out of frame  
 Hotspot: ●

# GATA3 Variants

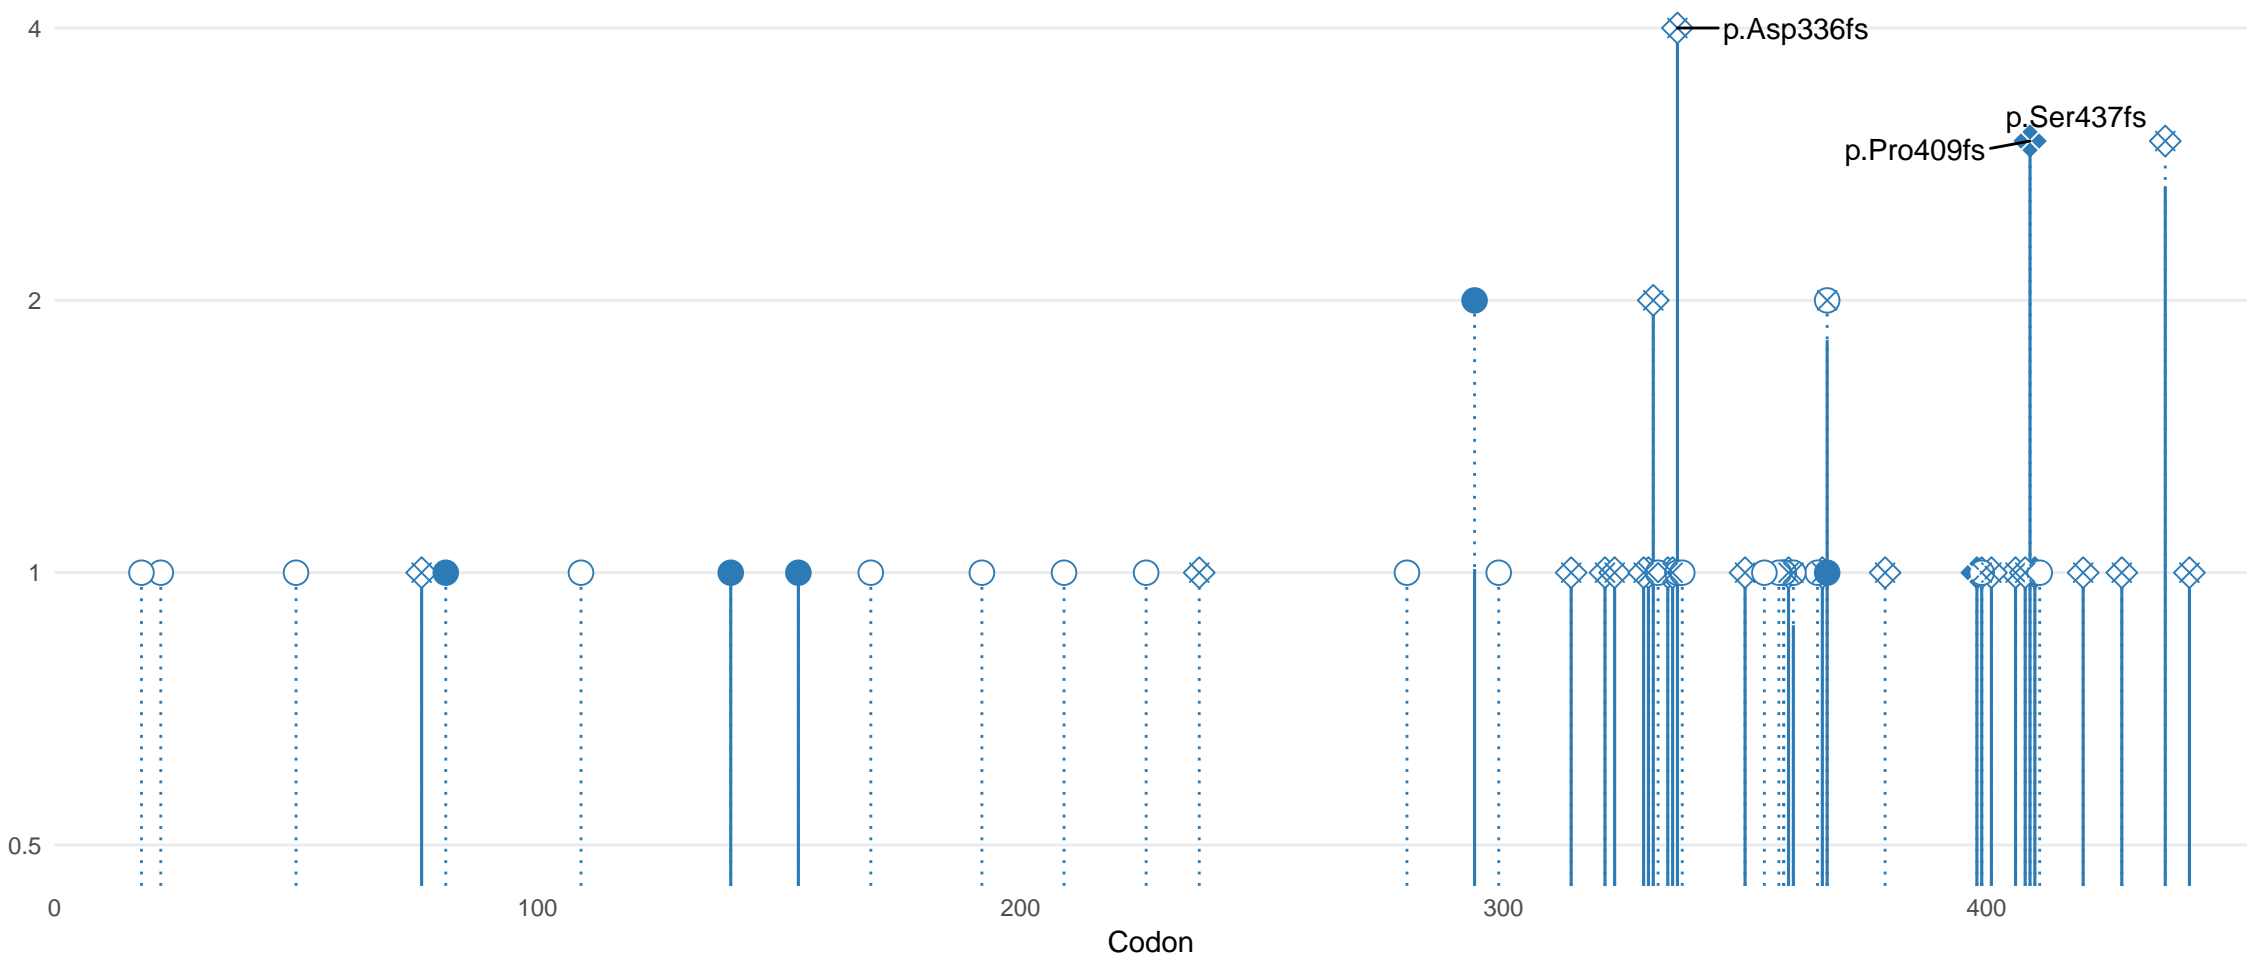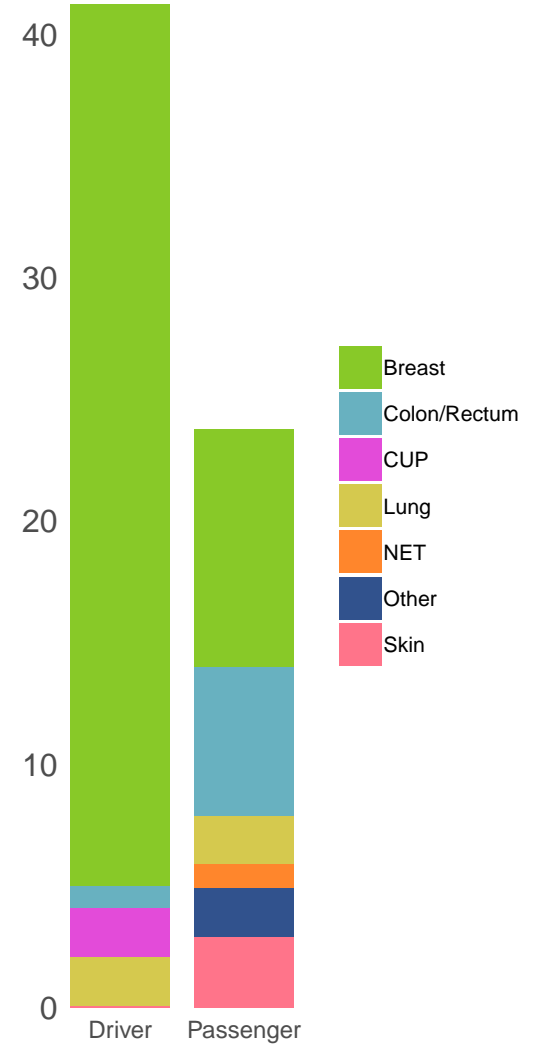

Monoallelic: ○ SNV □ MNV ◇ INDEL in frame ⊗ SNV nonsense ⊗ MNV nonsense ⊗ INDEL out of frame Biallelic/Multihit: ● SNV ■ MNV ◆ INDEL in frame ⊗ SNV nonsense ⊗ MNV nonsense ◆ INDEL out of frame Hotspot: ●

# GPS2 Variants

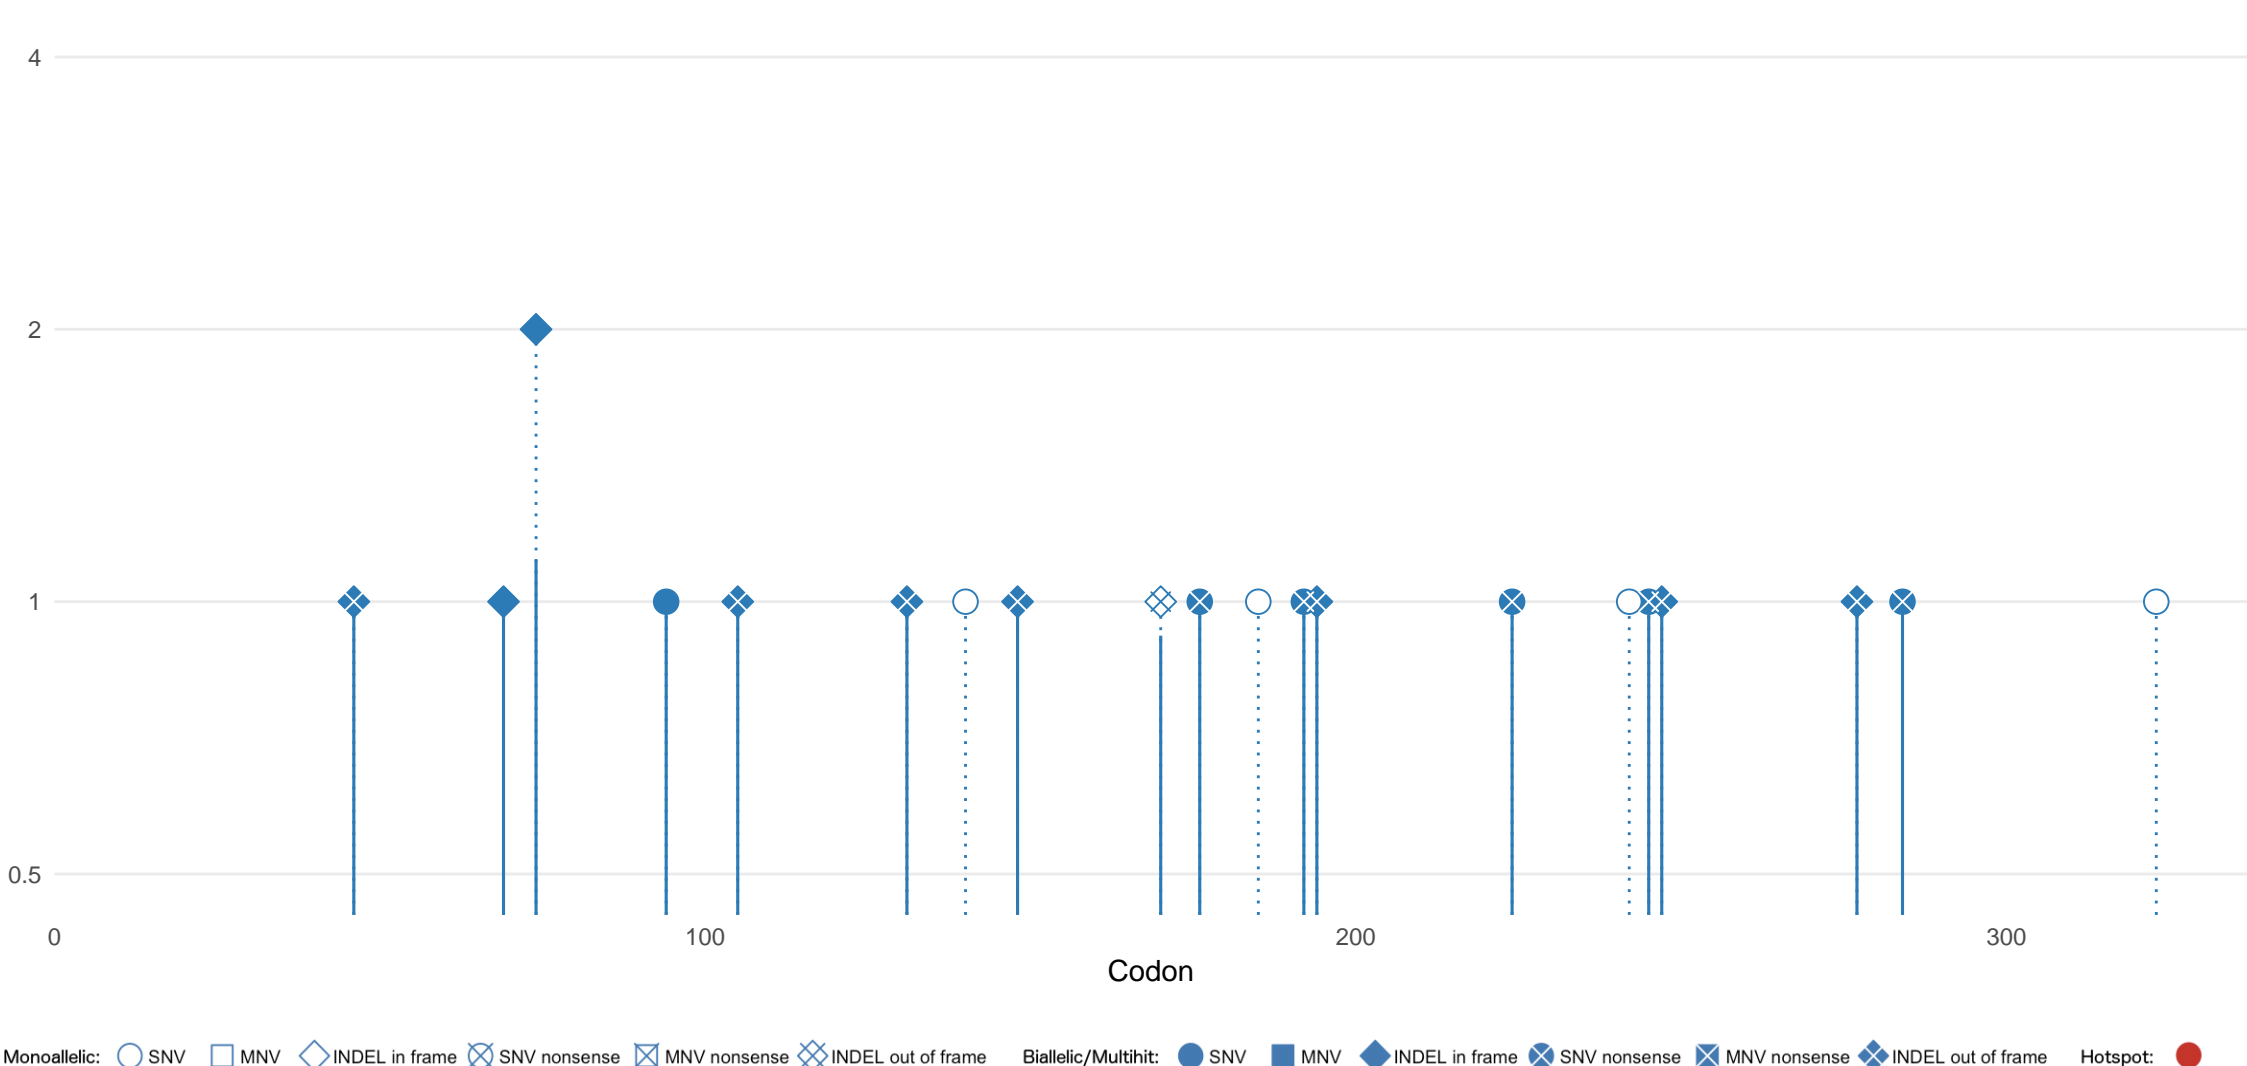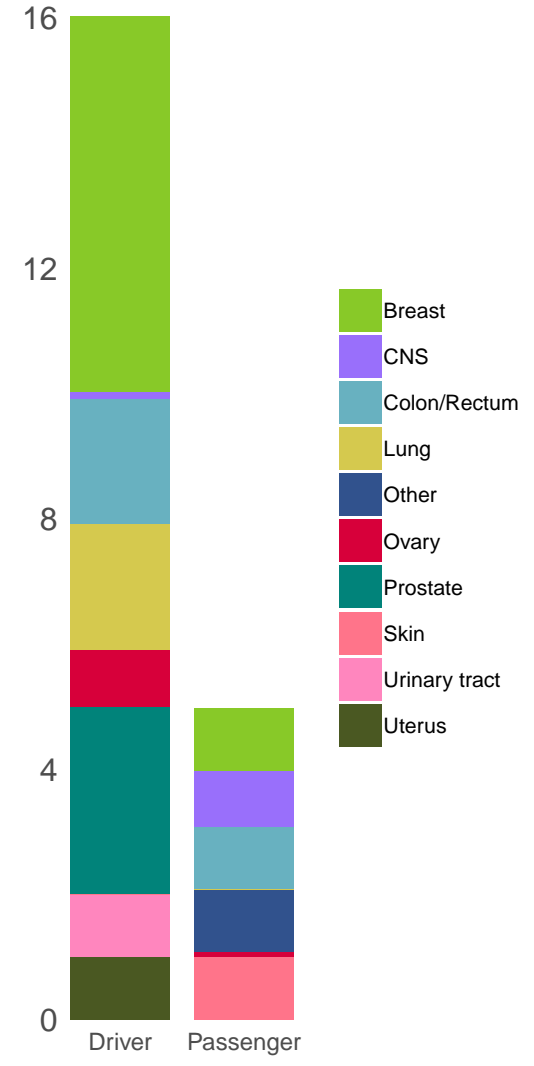



# GRIN2A Variants

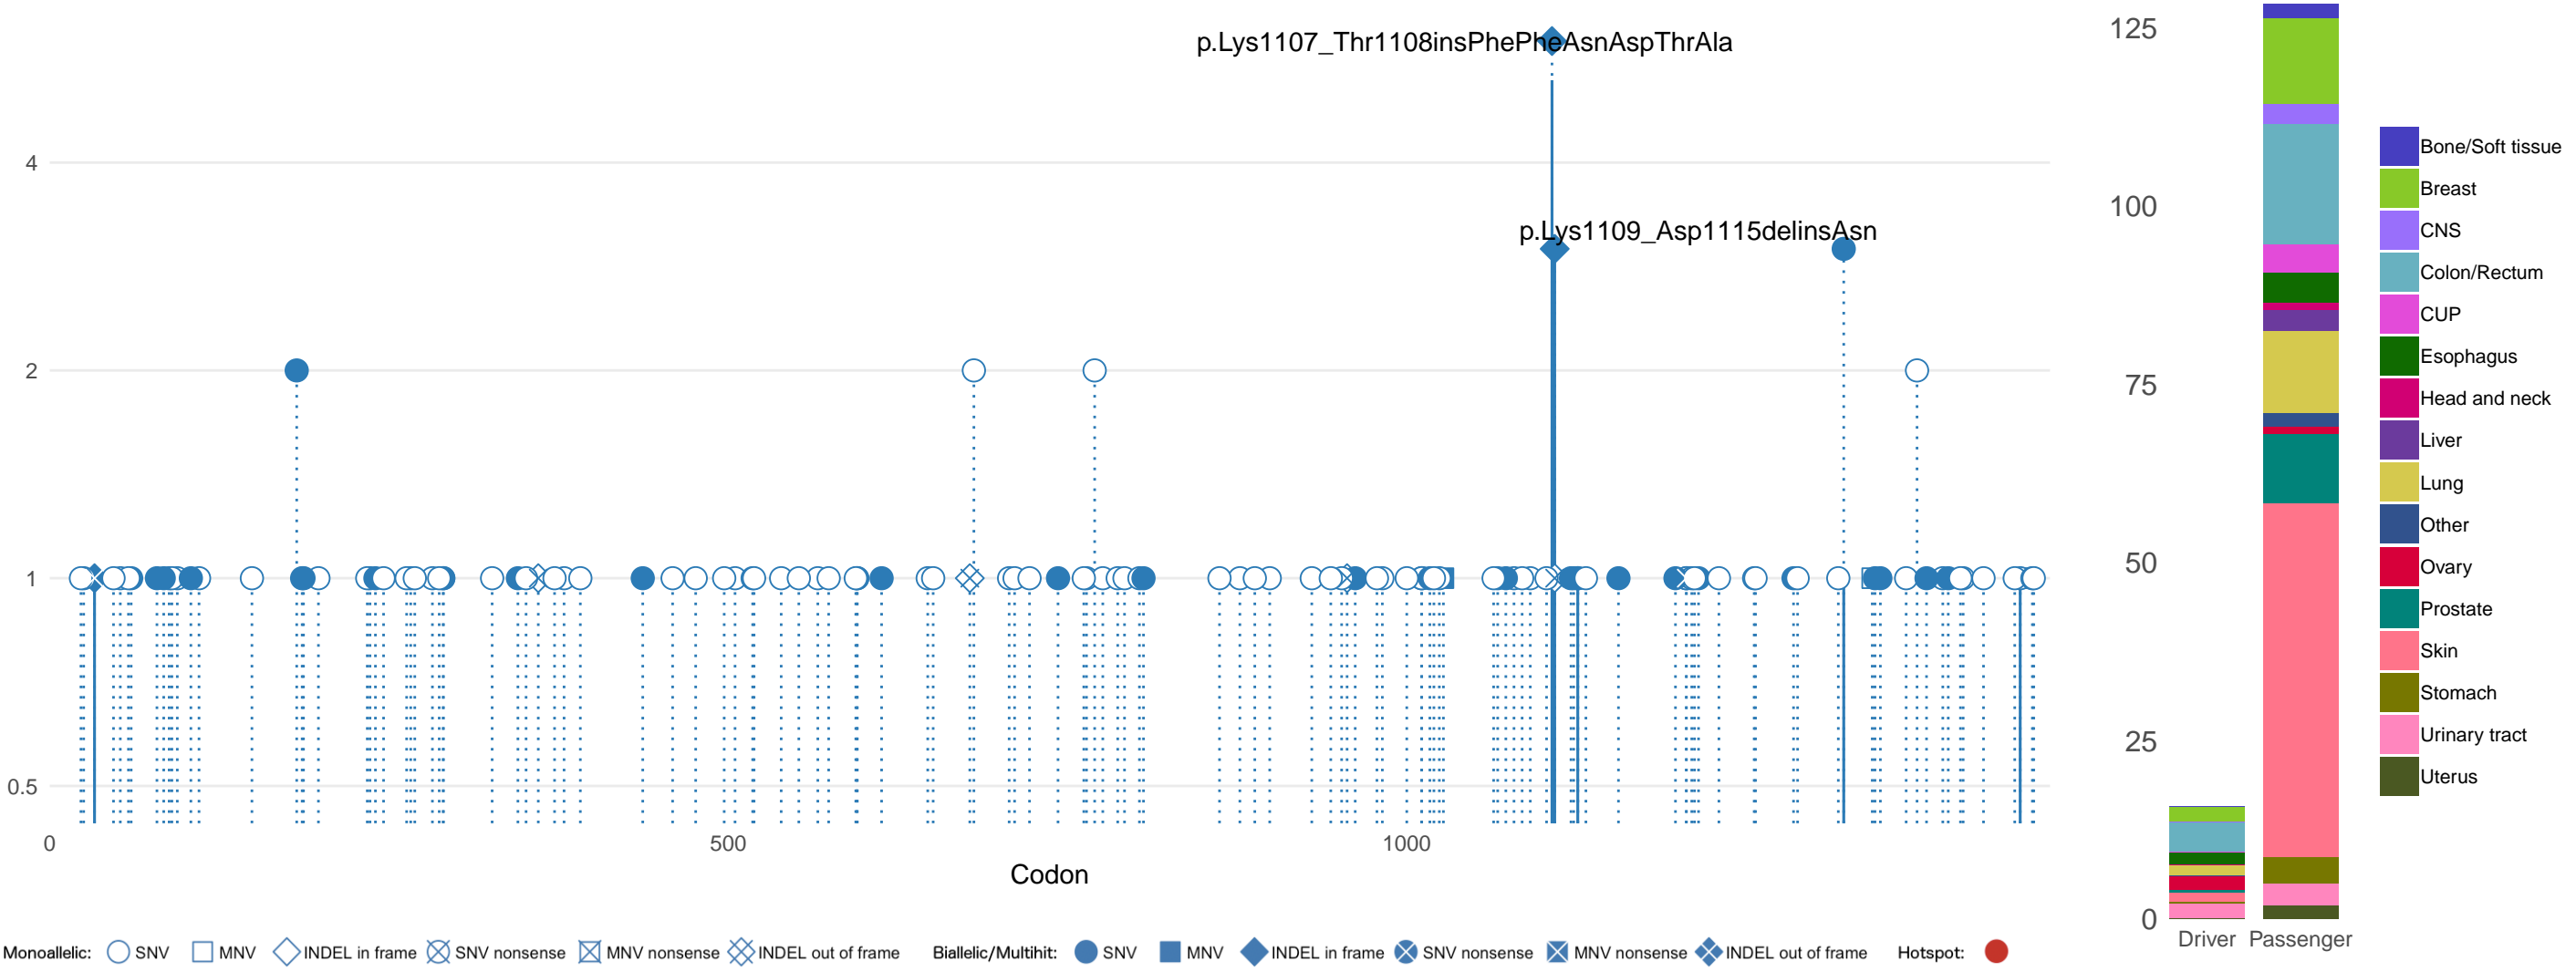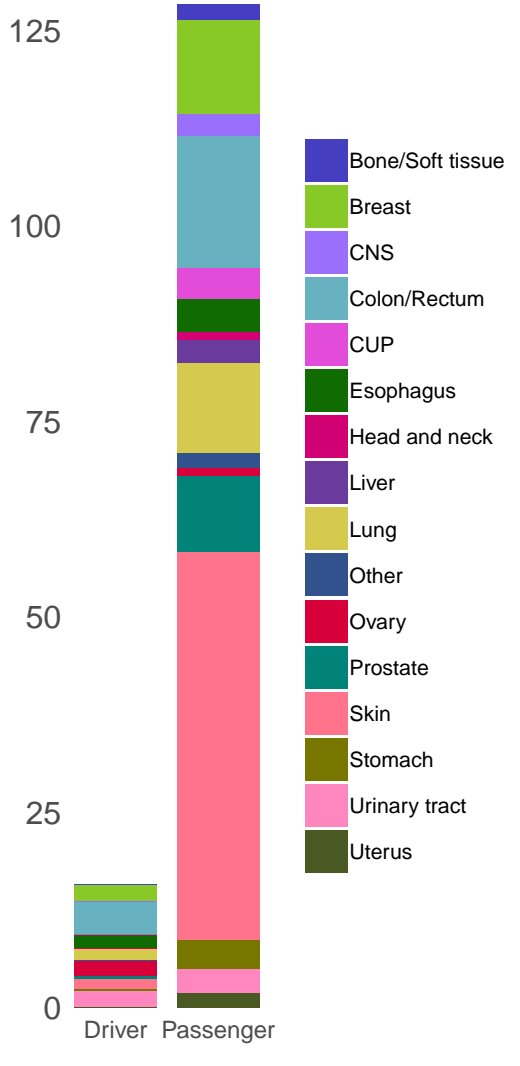

# HLA-A Variants

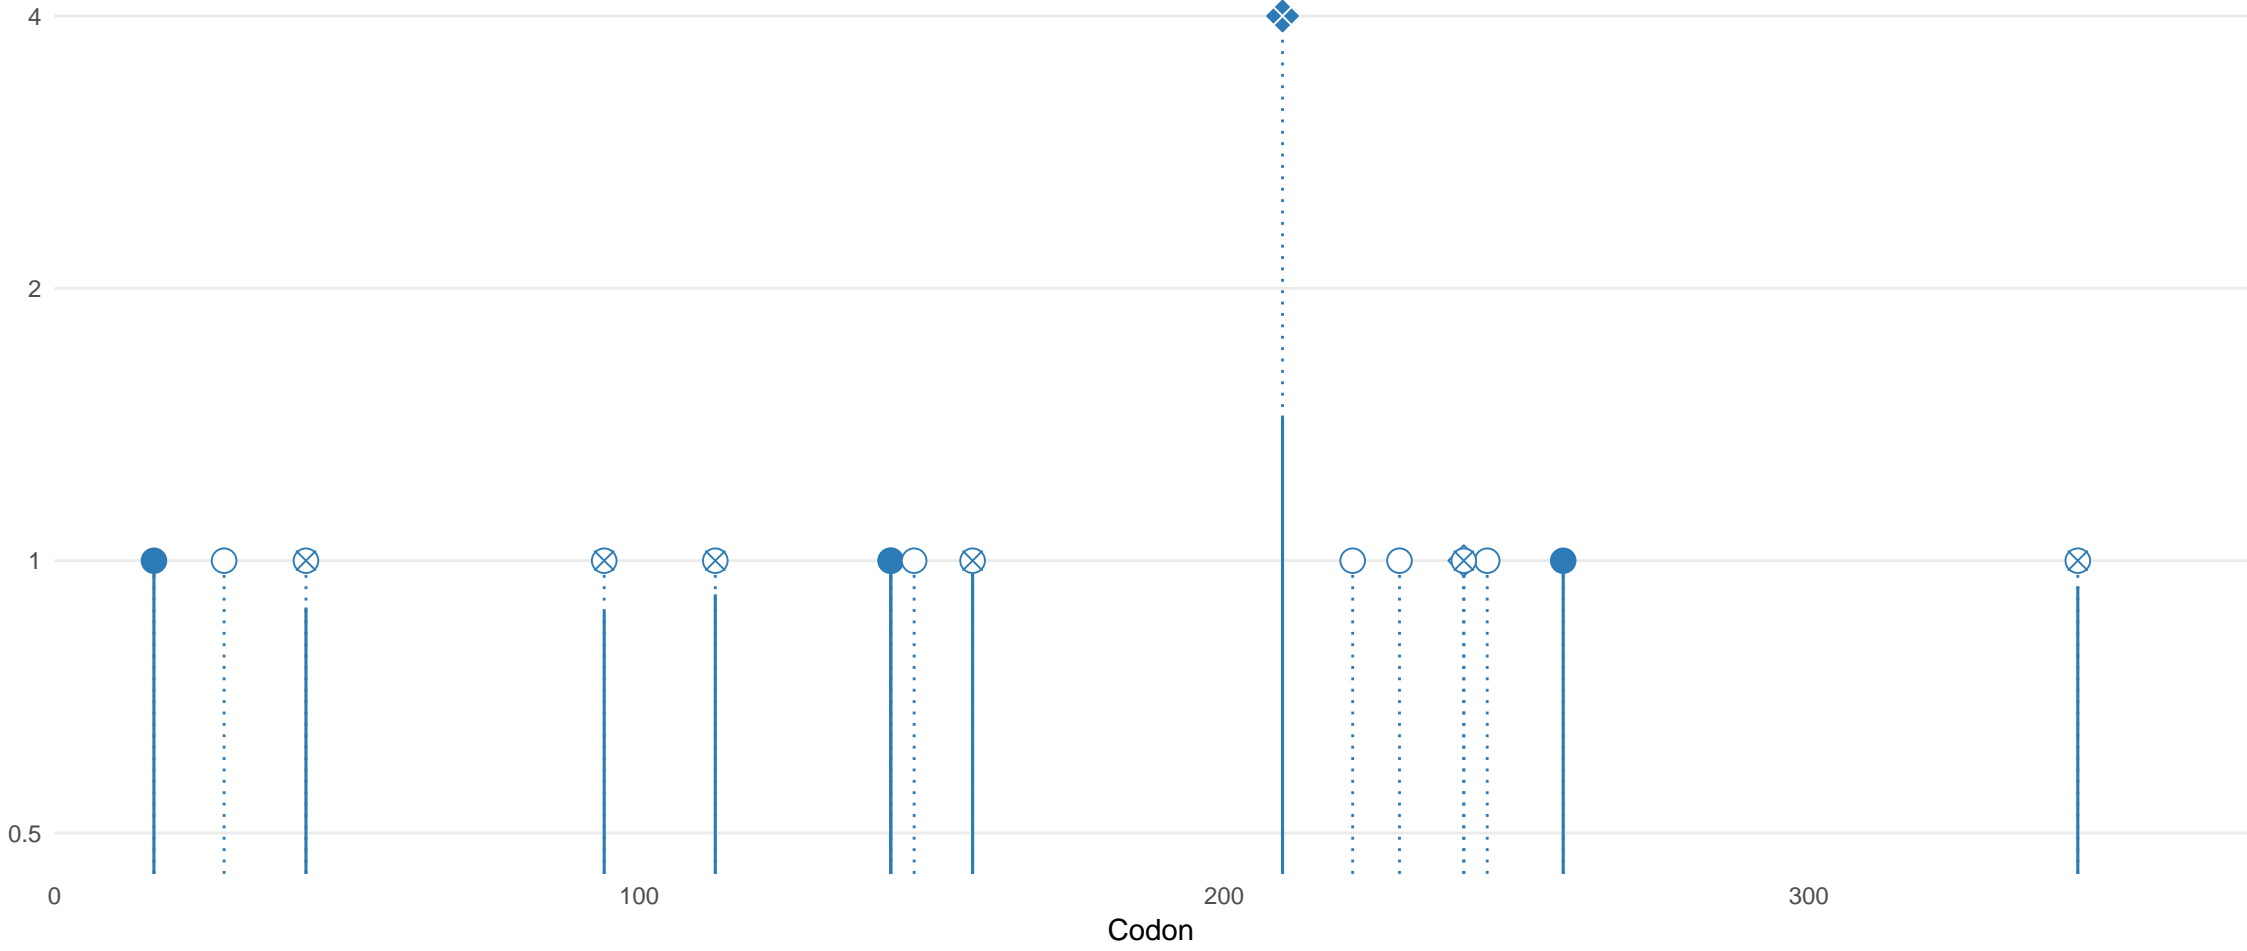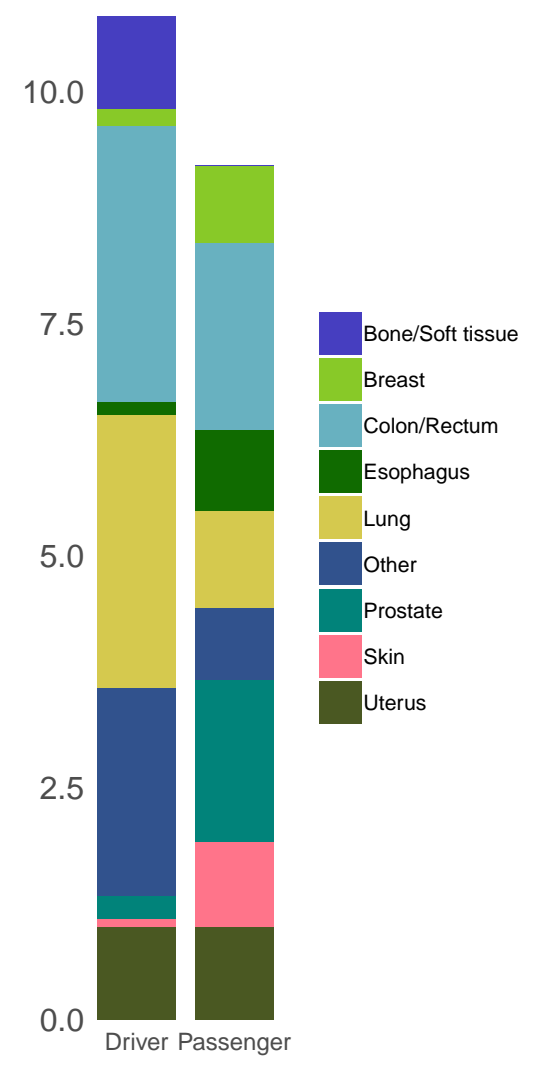

Monoallelic: ○ SNV □ MNV ◇ INDEL in frame ⊗ SNV nonsense ⊗ MNV nonsense ⊗ INDEL out of frame  
 Biallelic/Multihit: ● SNV ■ MNV ◆ INDEL in frame ⊗ SNV nonsense ⊗ MNV nonsense ◆ INDEL out of frame  
 Hotspot: ●

# HLA-B Variants

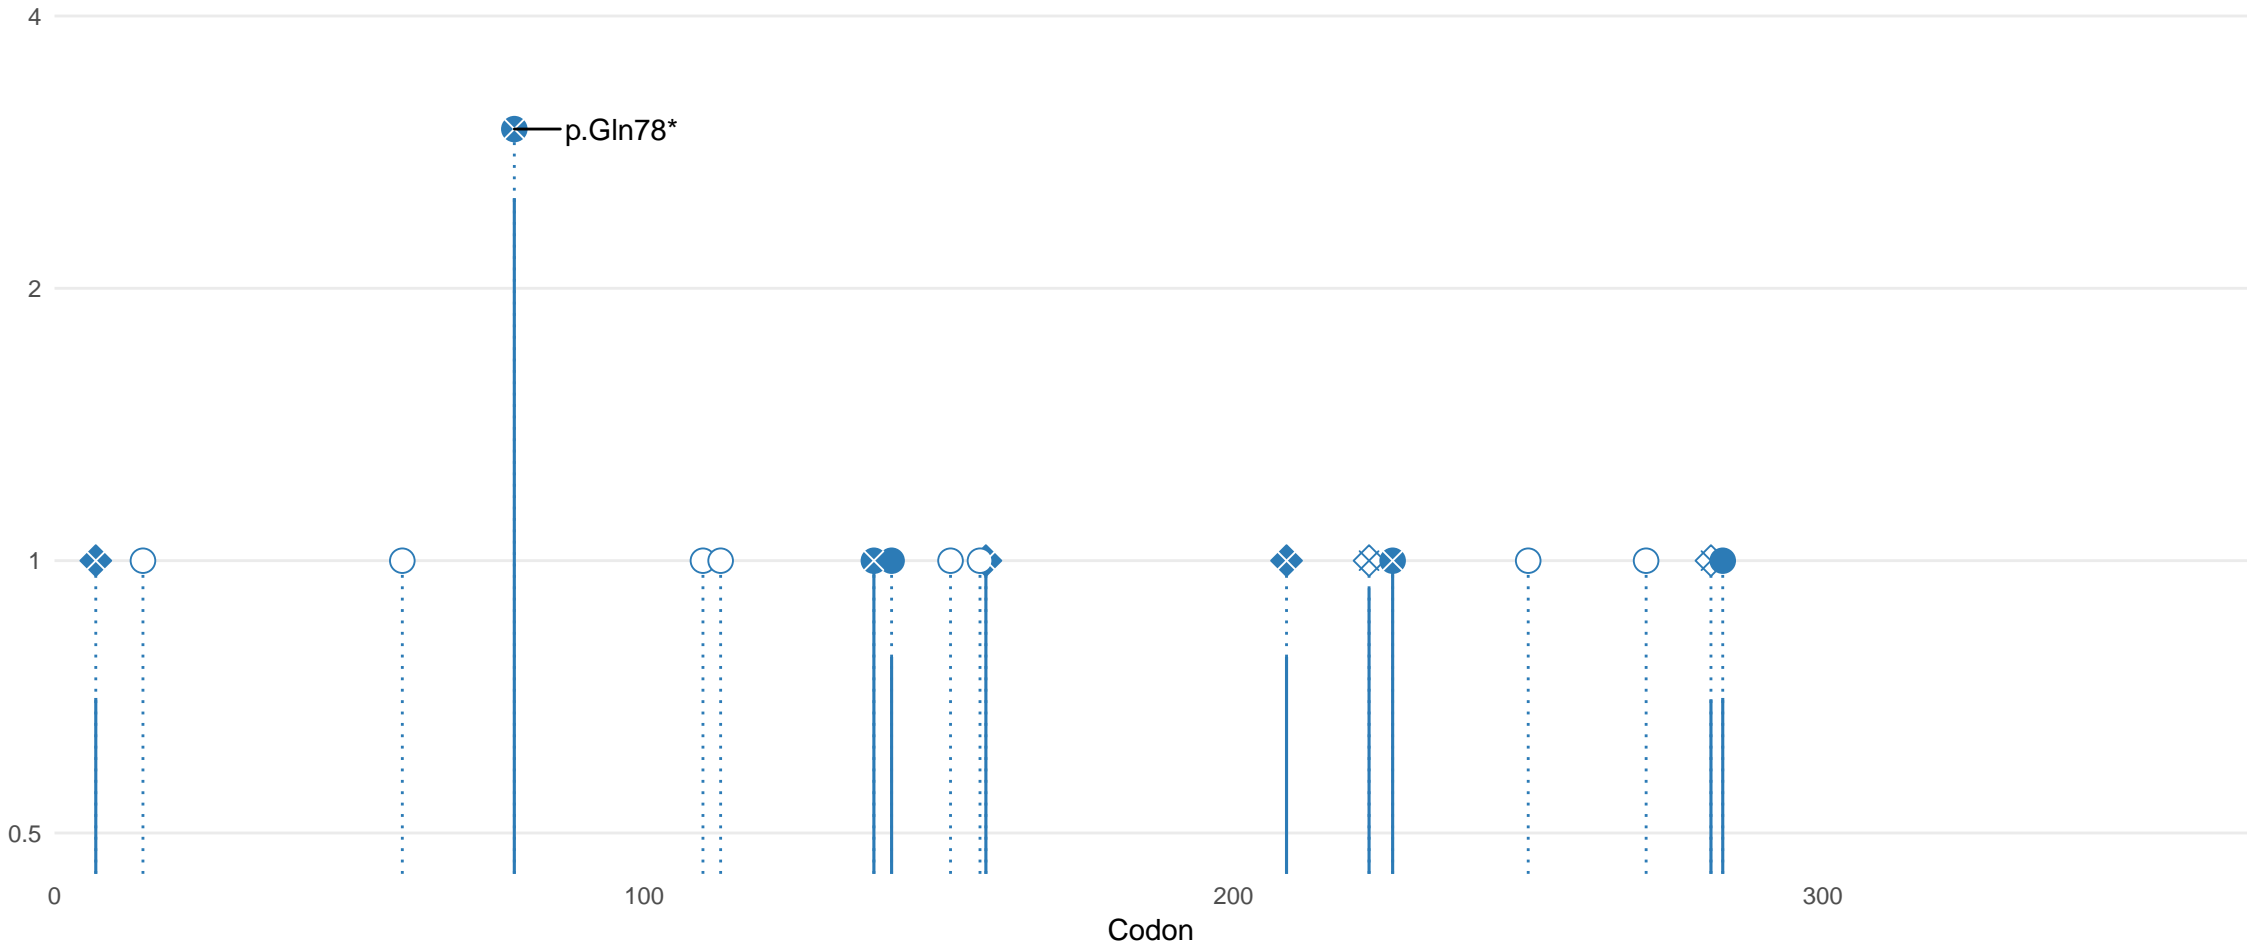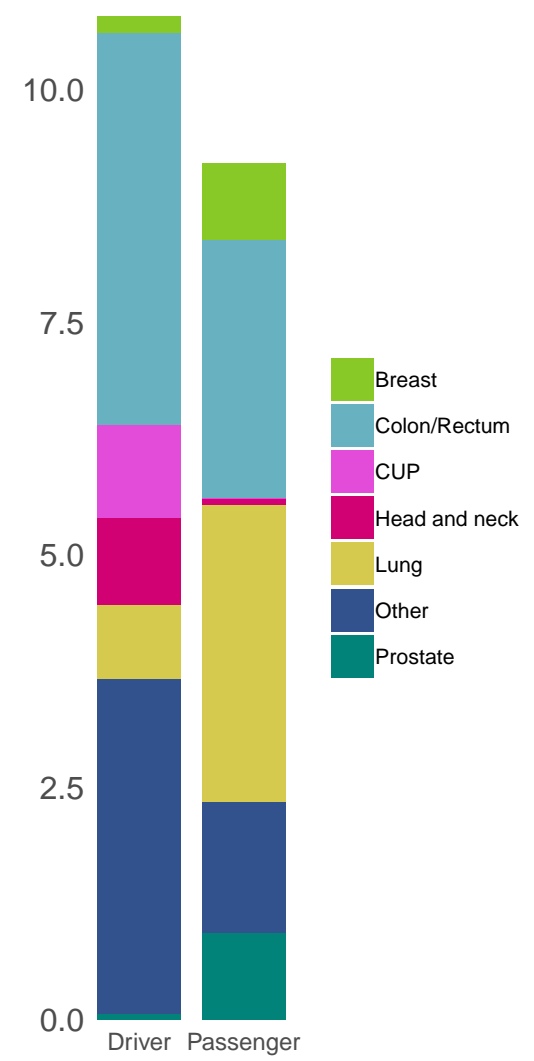

Monoallelic: ○ SNV □ MNV ◇ INDEL in frame ⊗ SNV nonsense ⊗ MNV nonsense ⊗ INDEL out of frame  
 Biallelic/Multihit: ● SNV ■ MNV ◆ INDEL in frame ⊗ SNV nonsense ⊗ MNV nonsense ◆ INDEL out of frame  
 Hotspot: ●

# HNF1A Variants

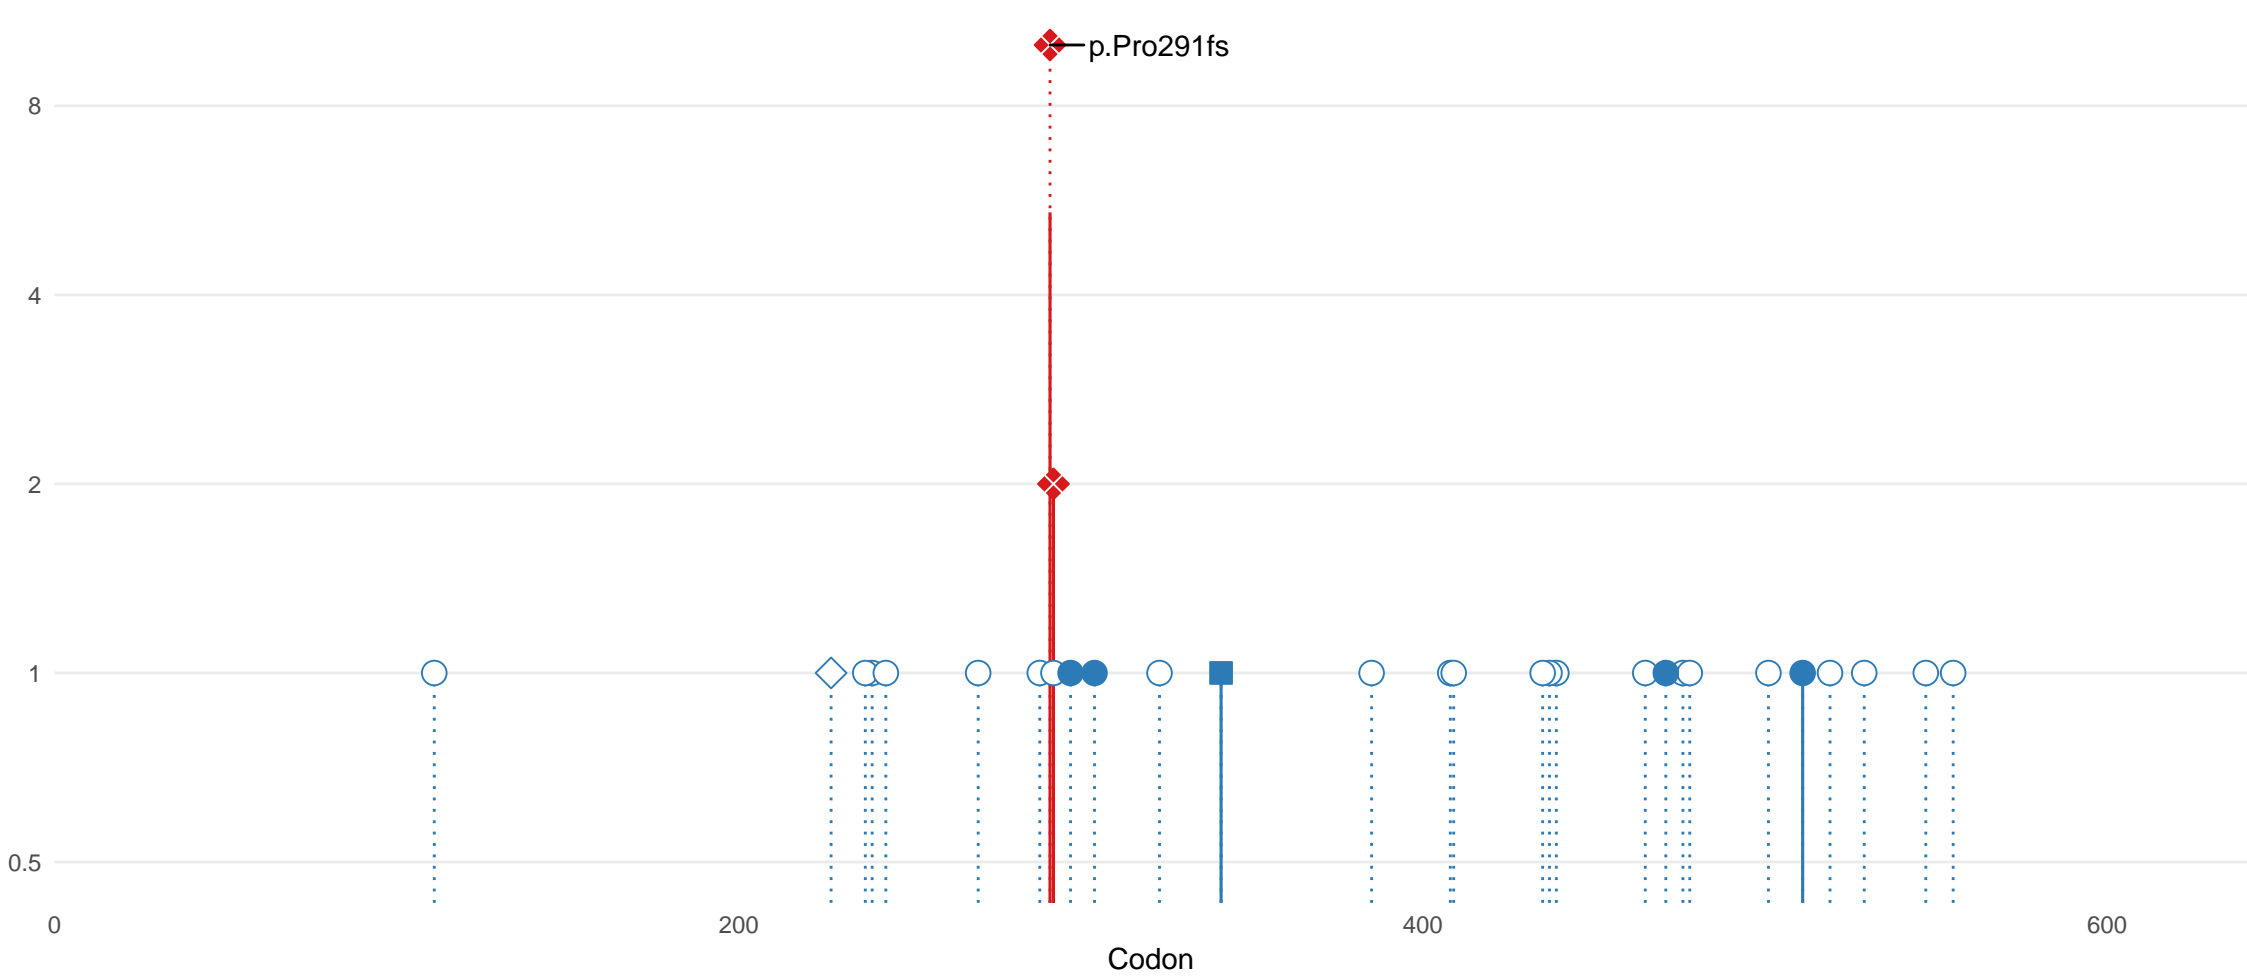

Monoallelic: ○ SNV □ MNV ◇ INDEL in frame ⊗ SNV nonsense ⊗ MNV nonsense ⊗ INDEL out of frame  
 Biallelic/Multihit: ● SNV ■ MNV ◆ INDEL in frame ⊗ SNV nonsense ⊗ MNV nonsense ◆ INDEL out of frame  
 Hotspot: ●

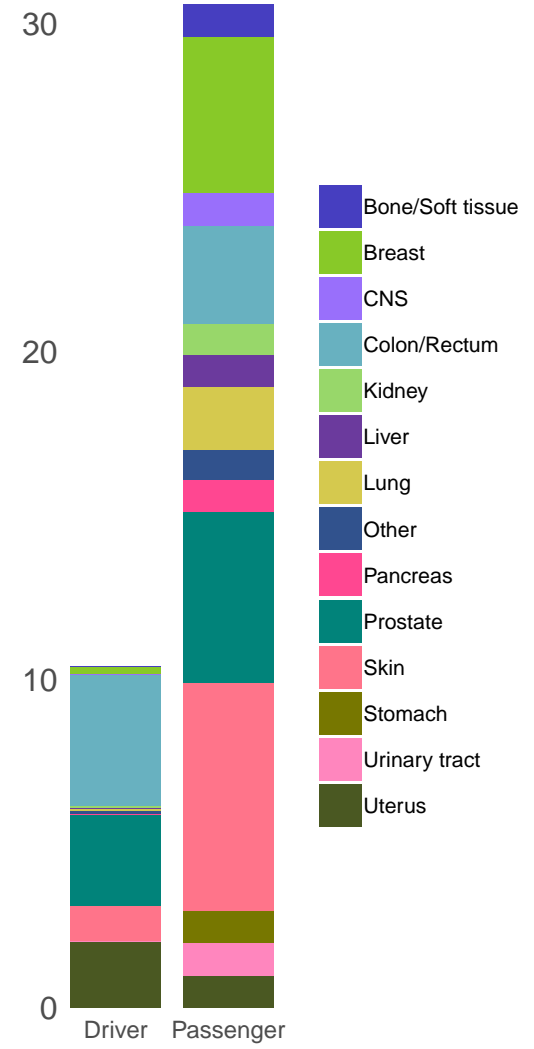

# IKZF1 Variants

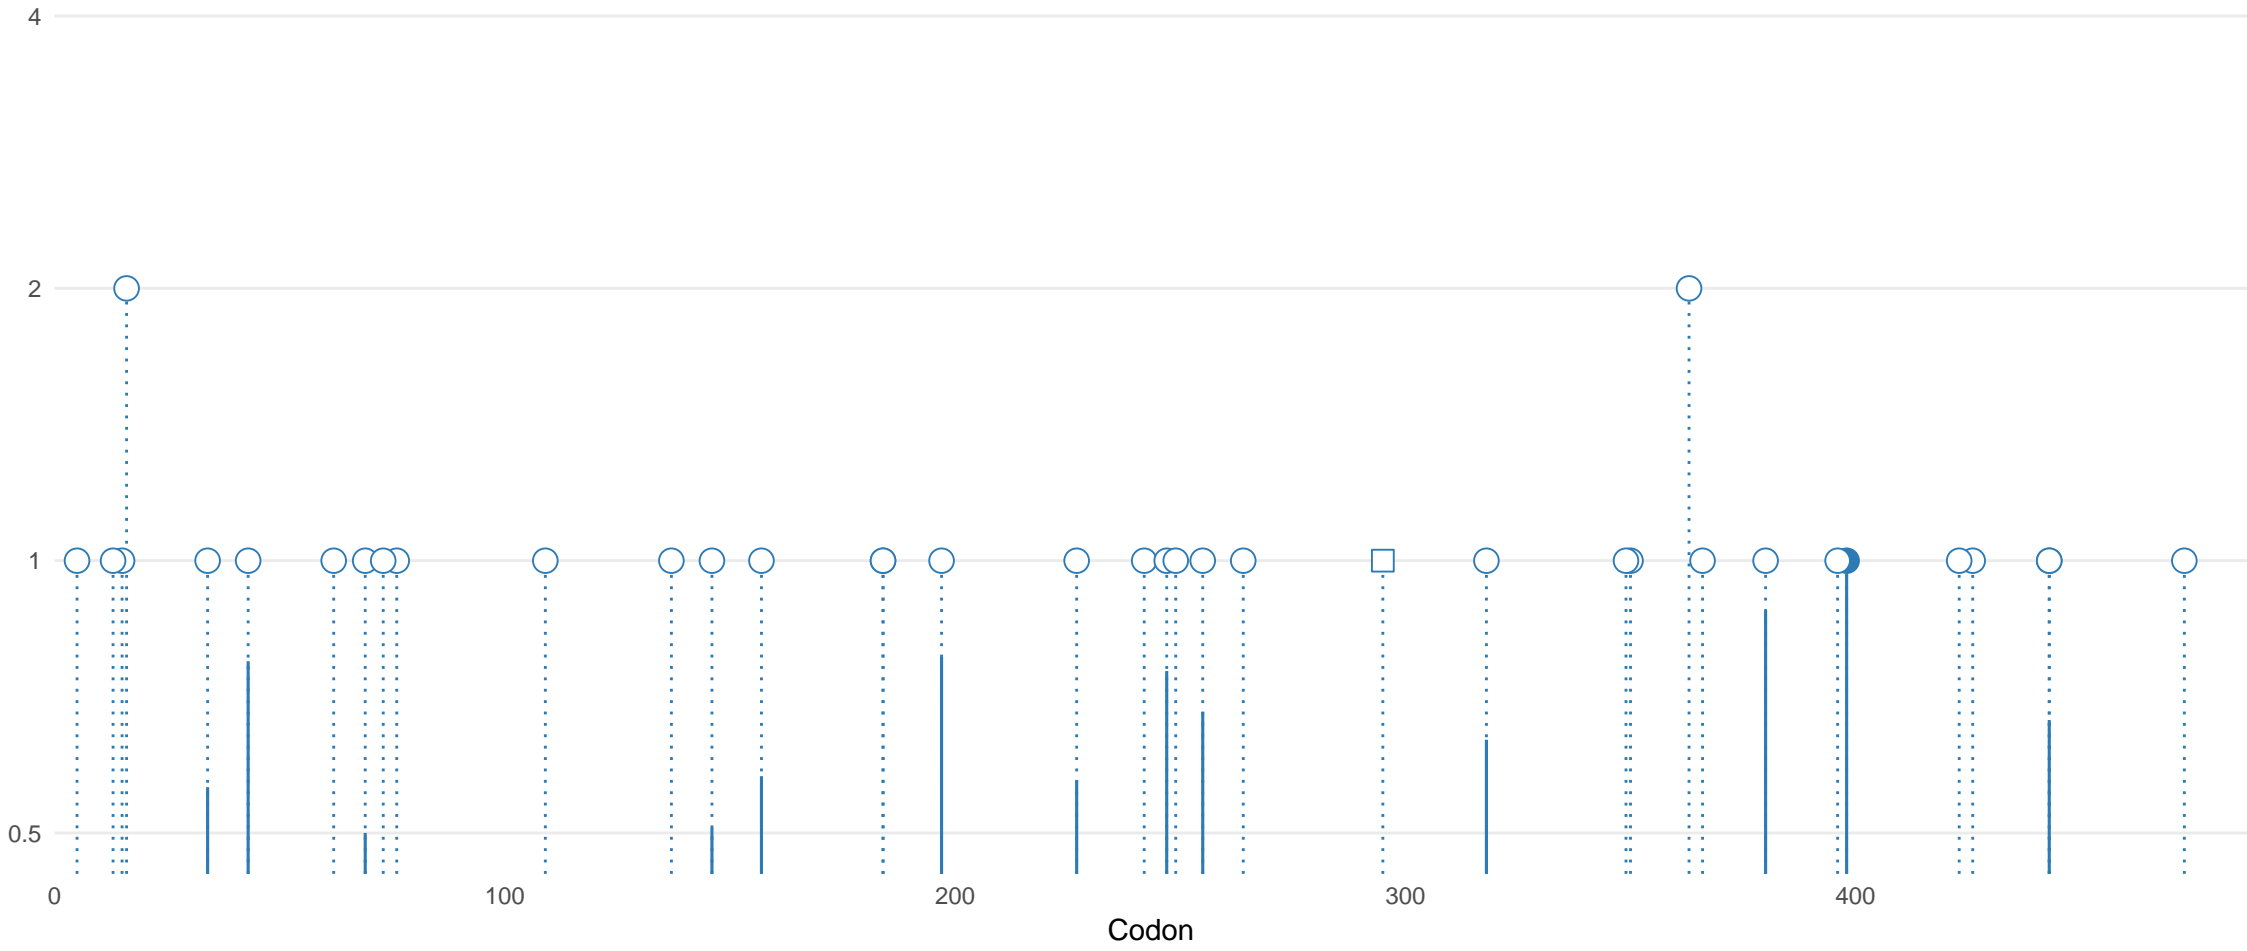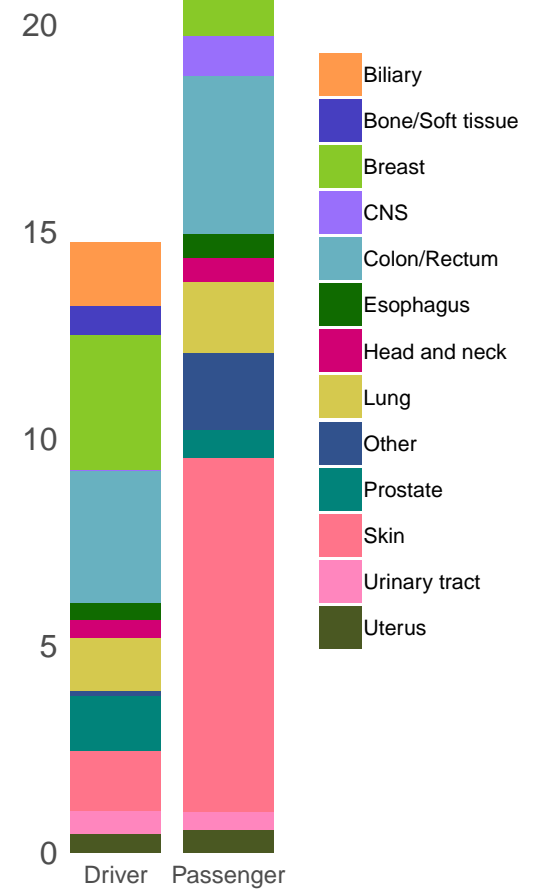

# JAK1 Variants

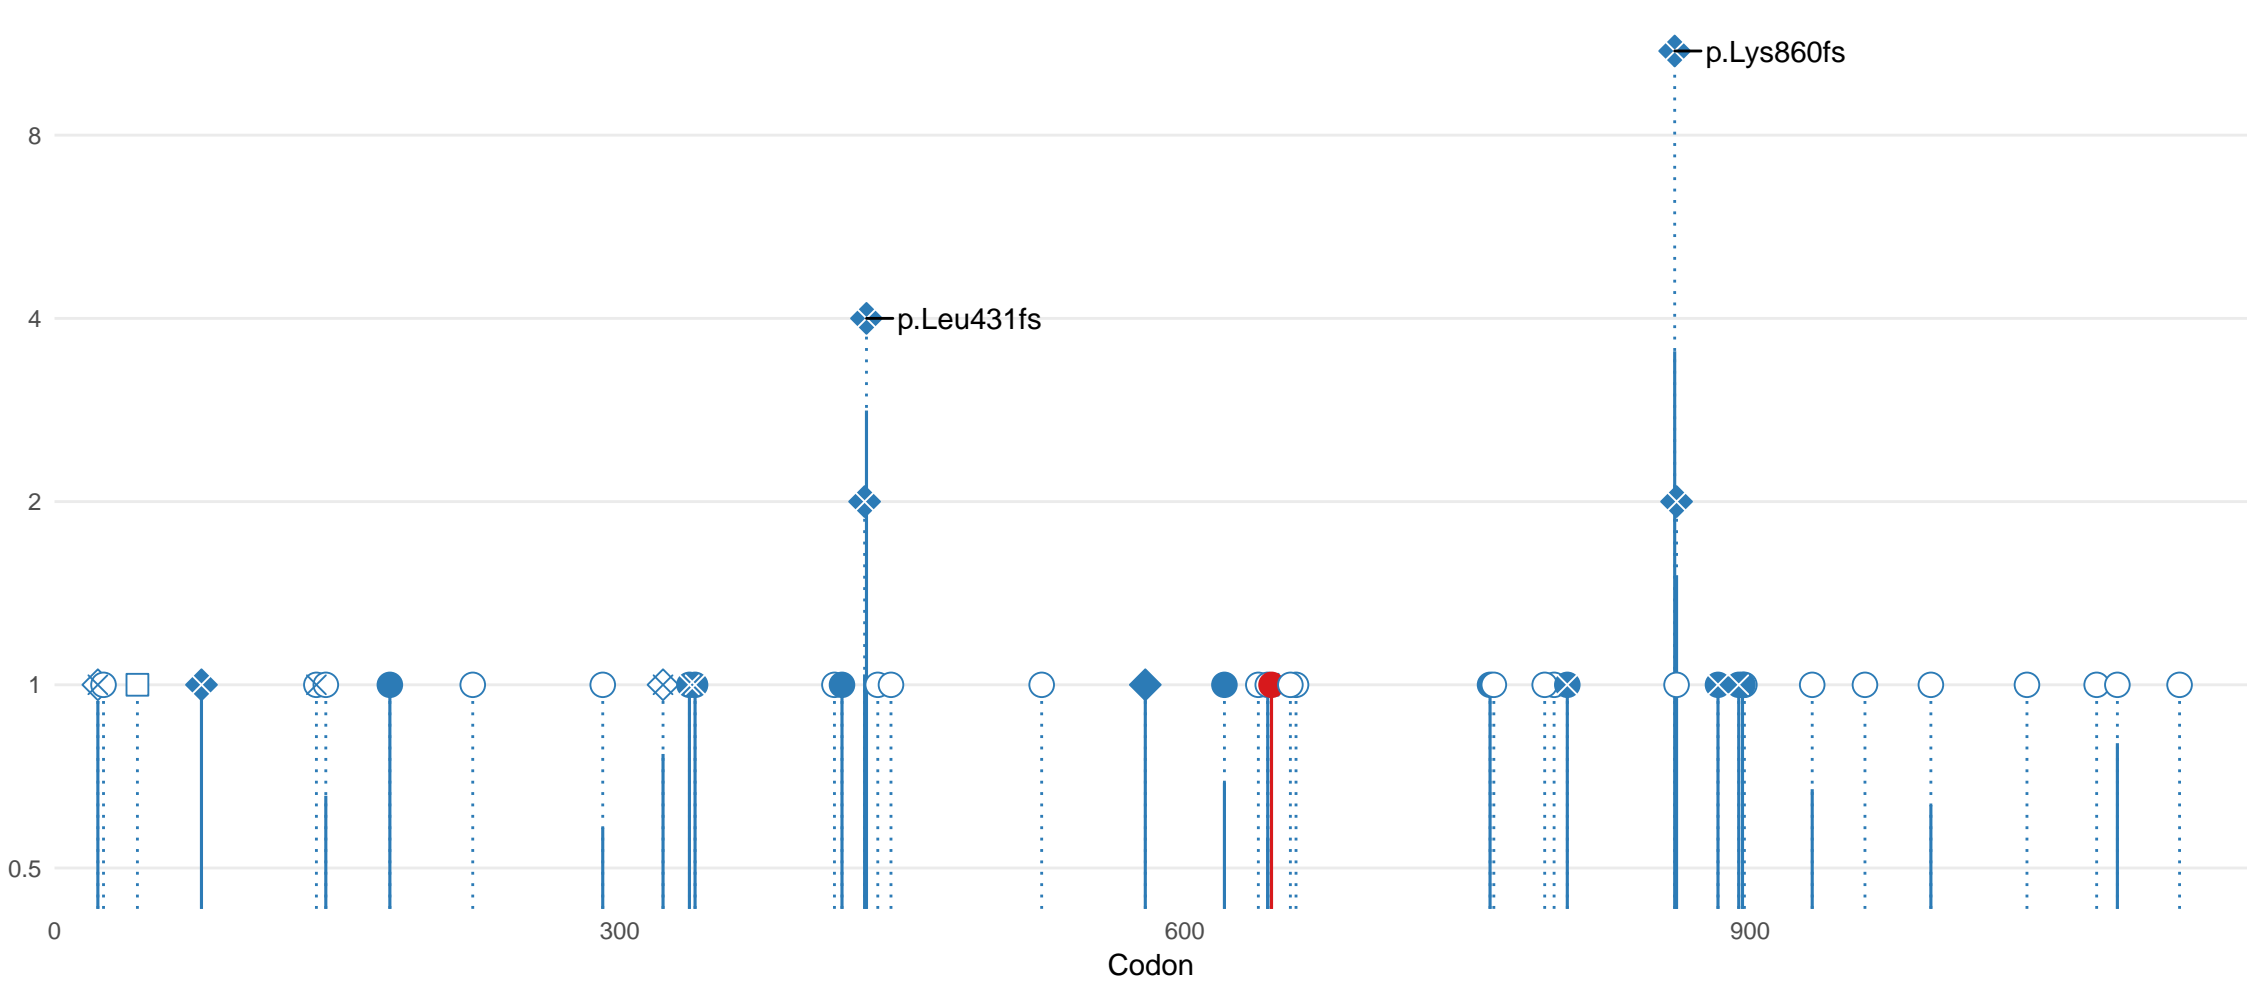

**Monoallelic:** ○ SNV □ MNV ◇ INDEL in frame ⊗ SNV nonsense ⊗ MNV nonsense ⊗ INDEL out of frame  
**Biallelic/Multihit:** ● SNV ■ MNV ◆ INDEL in frame ⊗ SNV nonsense ⊗ MNV nonsense ◆ INDEL out of frame  
**Hotspot:** ●

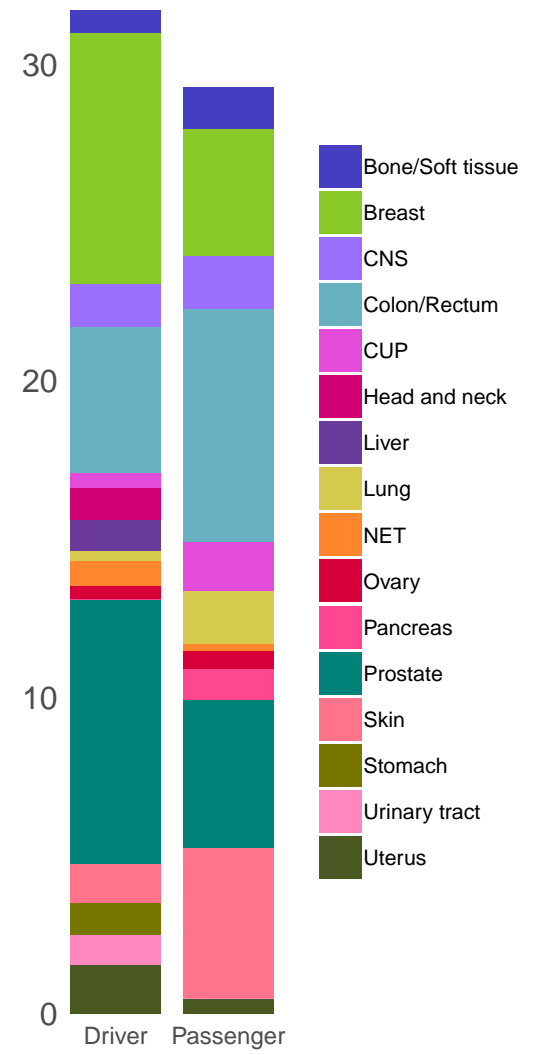

# KANSL1 Variants

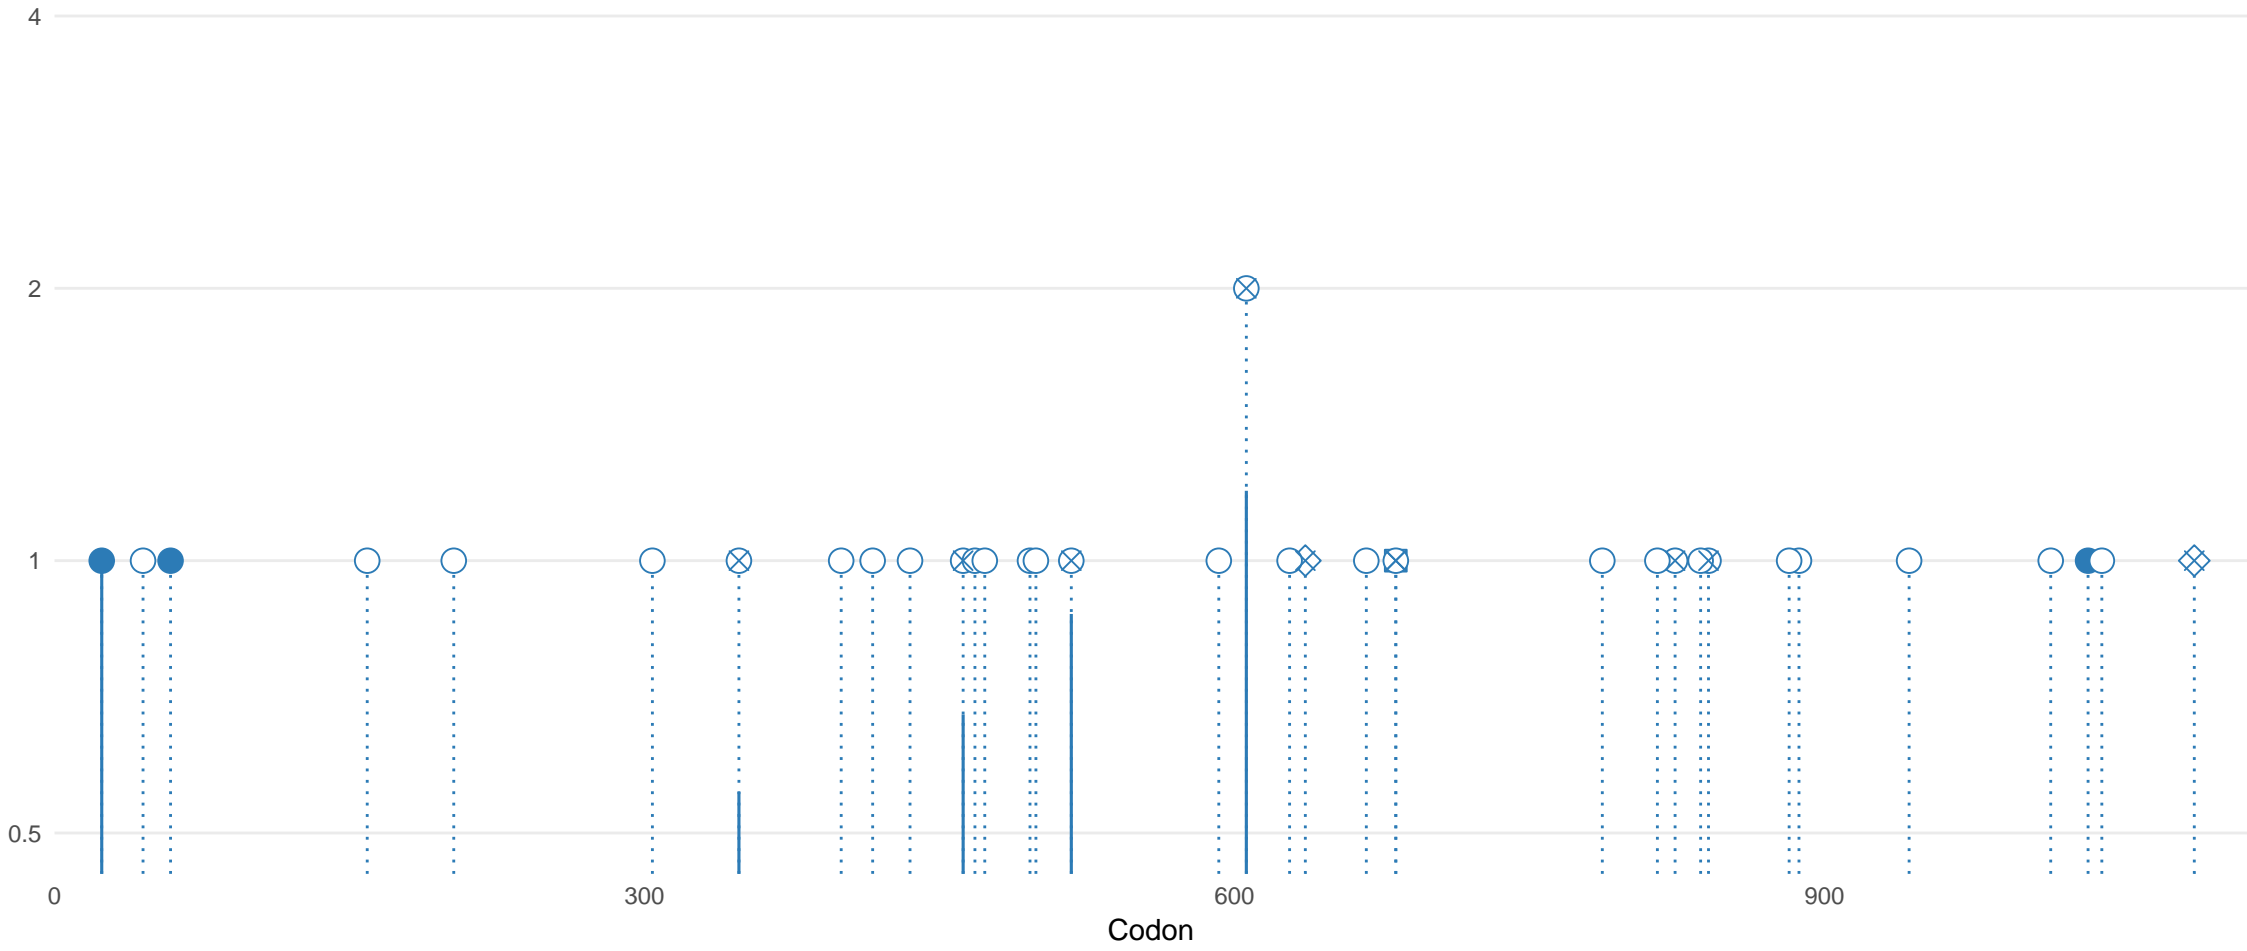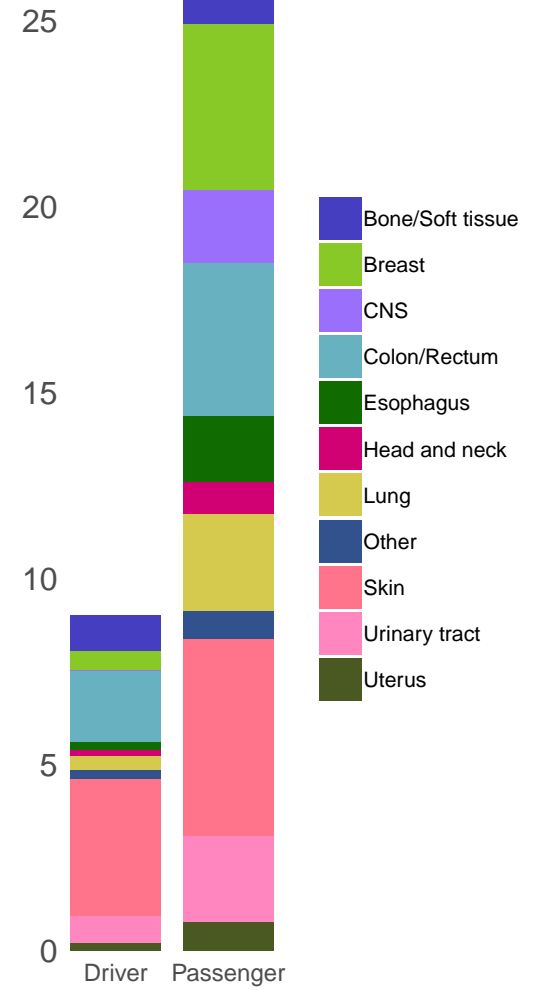

# KDM5C Variants

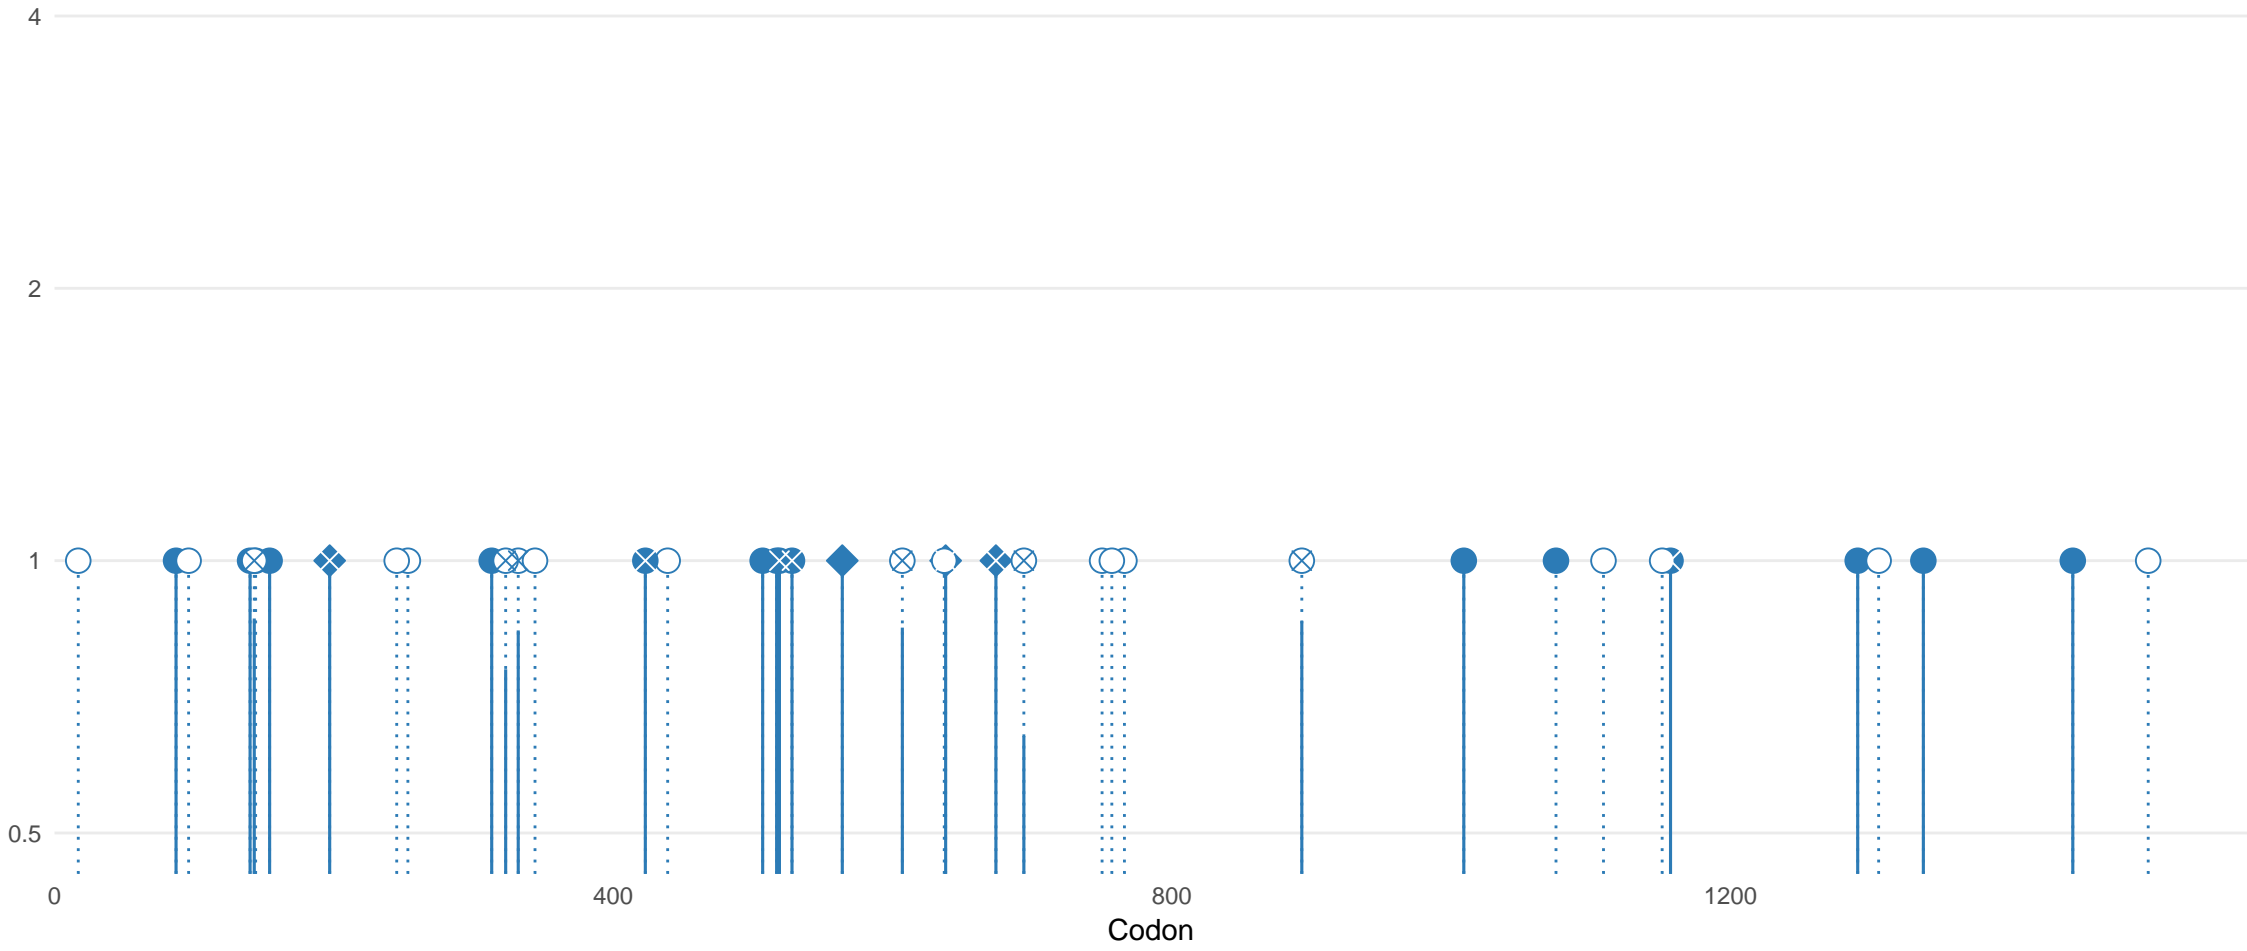

**Monoallelic:** ○ SNV □ MNV ◇ INDEL in frame ⊗ SNV nonsense ⊗ MNV nonsense ⊗ INDEL out of frame  
**Bi-allelic/Multihit:** ● SNV ■ MNV ◆ INDEL in frame ⊗ SNV nonsense ⊗ MNV nonsense ◆ INDEL out of frame  
**Hotspot:** ●

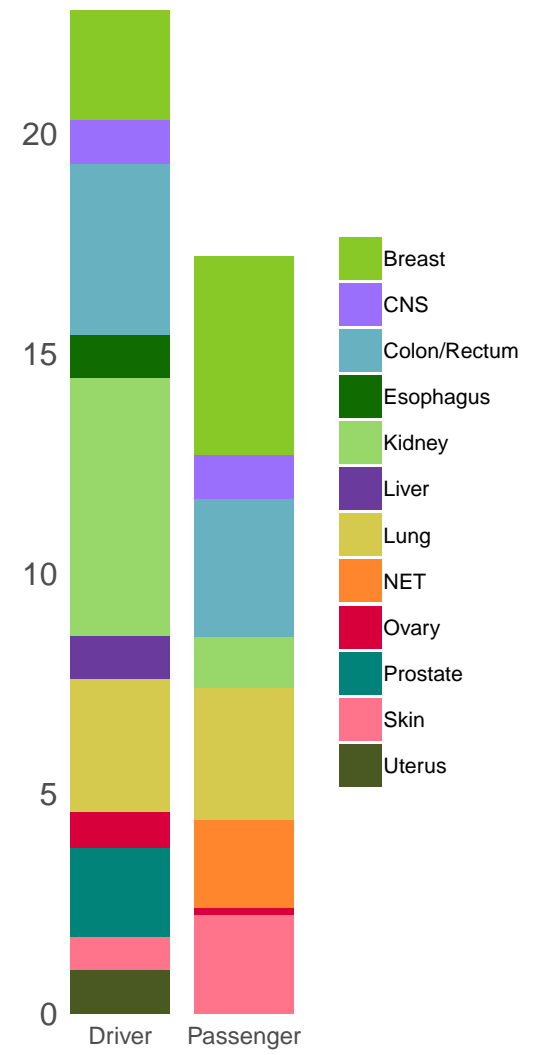



# KDM6A Variants

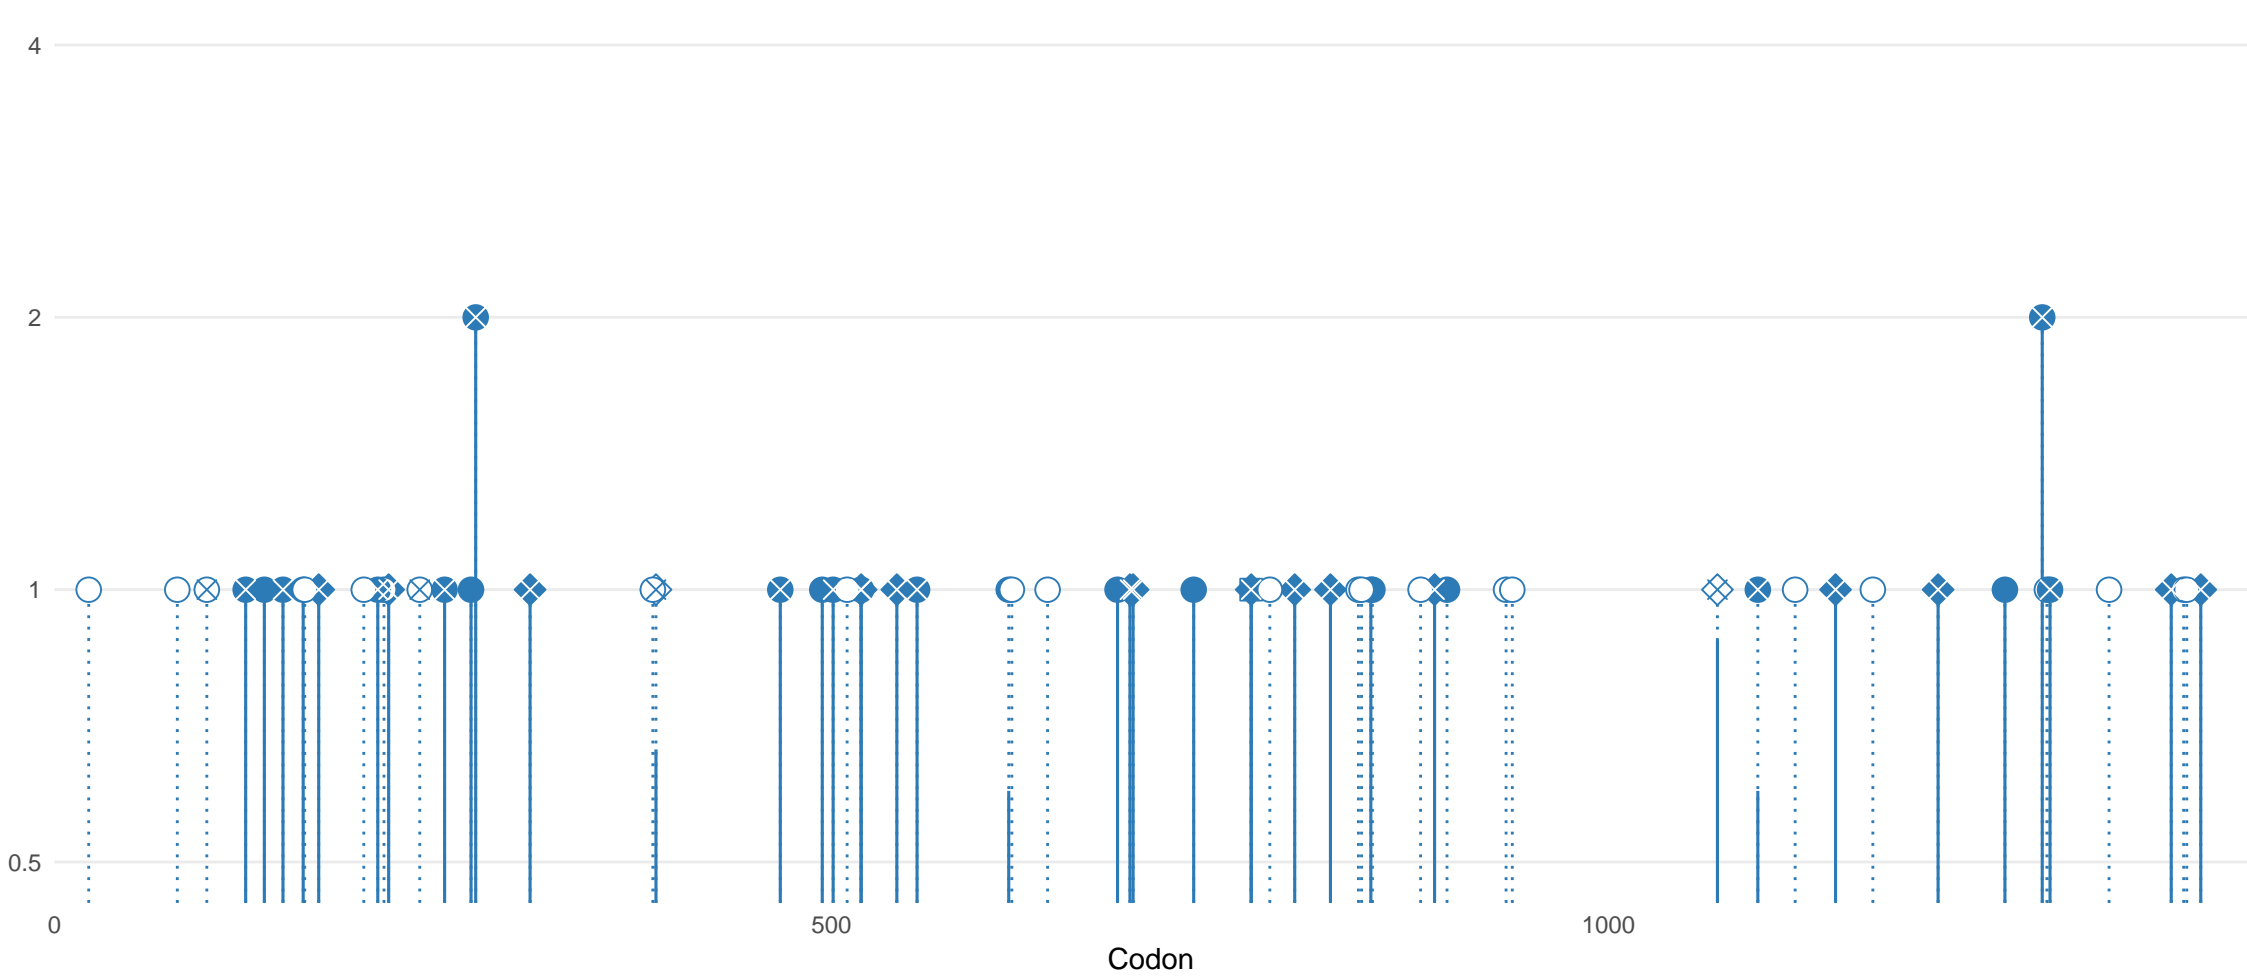

**Monoallelic:** ○ SNV □ MNV ◇ INDEL in frame ⊗ SNV nonsense ⊗ MNV nonsense ⊗ INDEL out of frame  
**Biallelic/Multihit:** ● SNV ■ MNV ◆ INDEL in frame ⊗ SNV nonsense ⊗ MNV nonsense ◆ INDEL out of frame  
**Hotspot:** ●

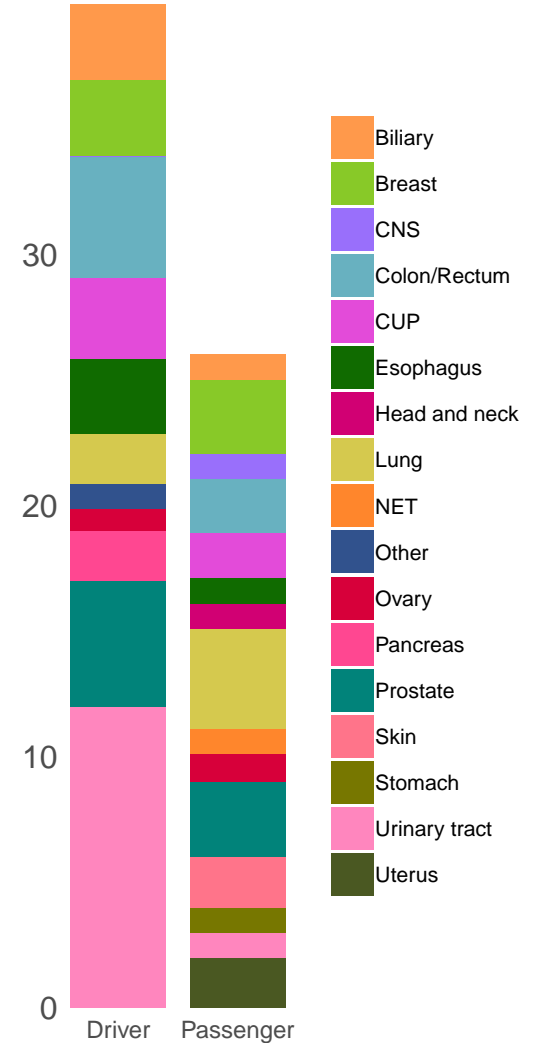

# KEAP1 Variants

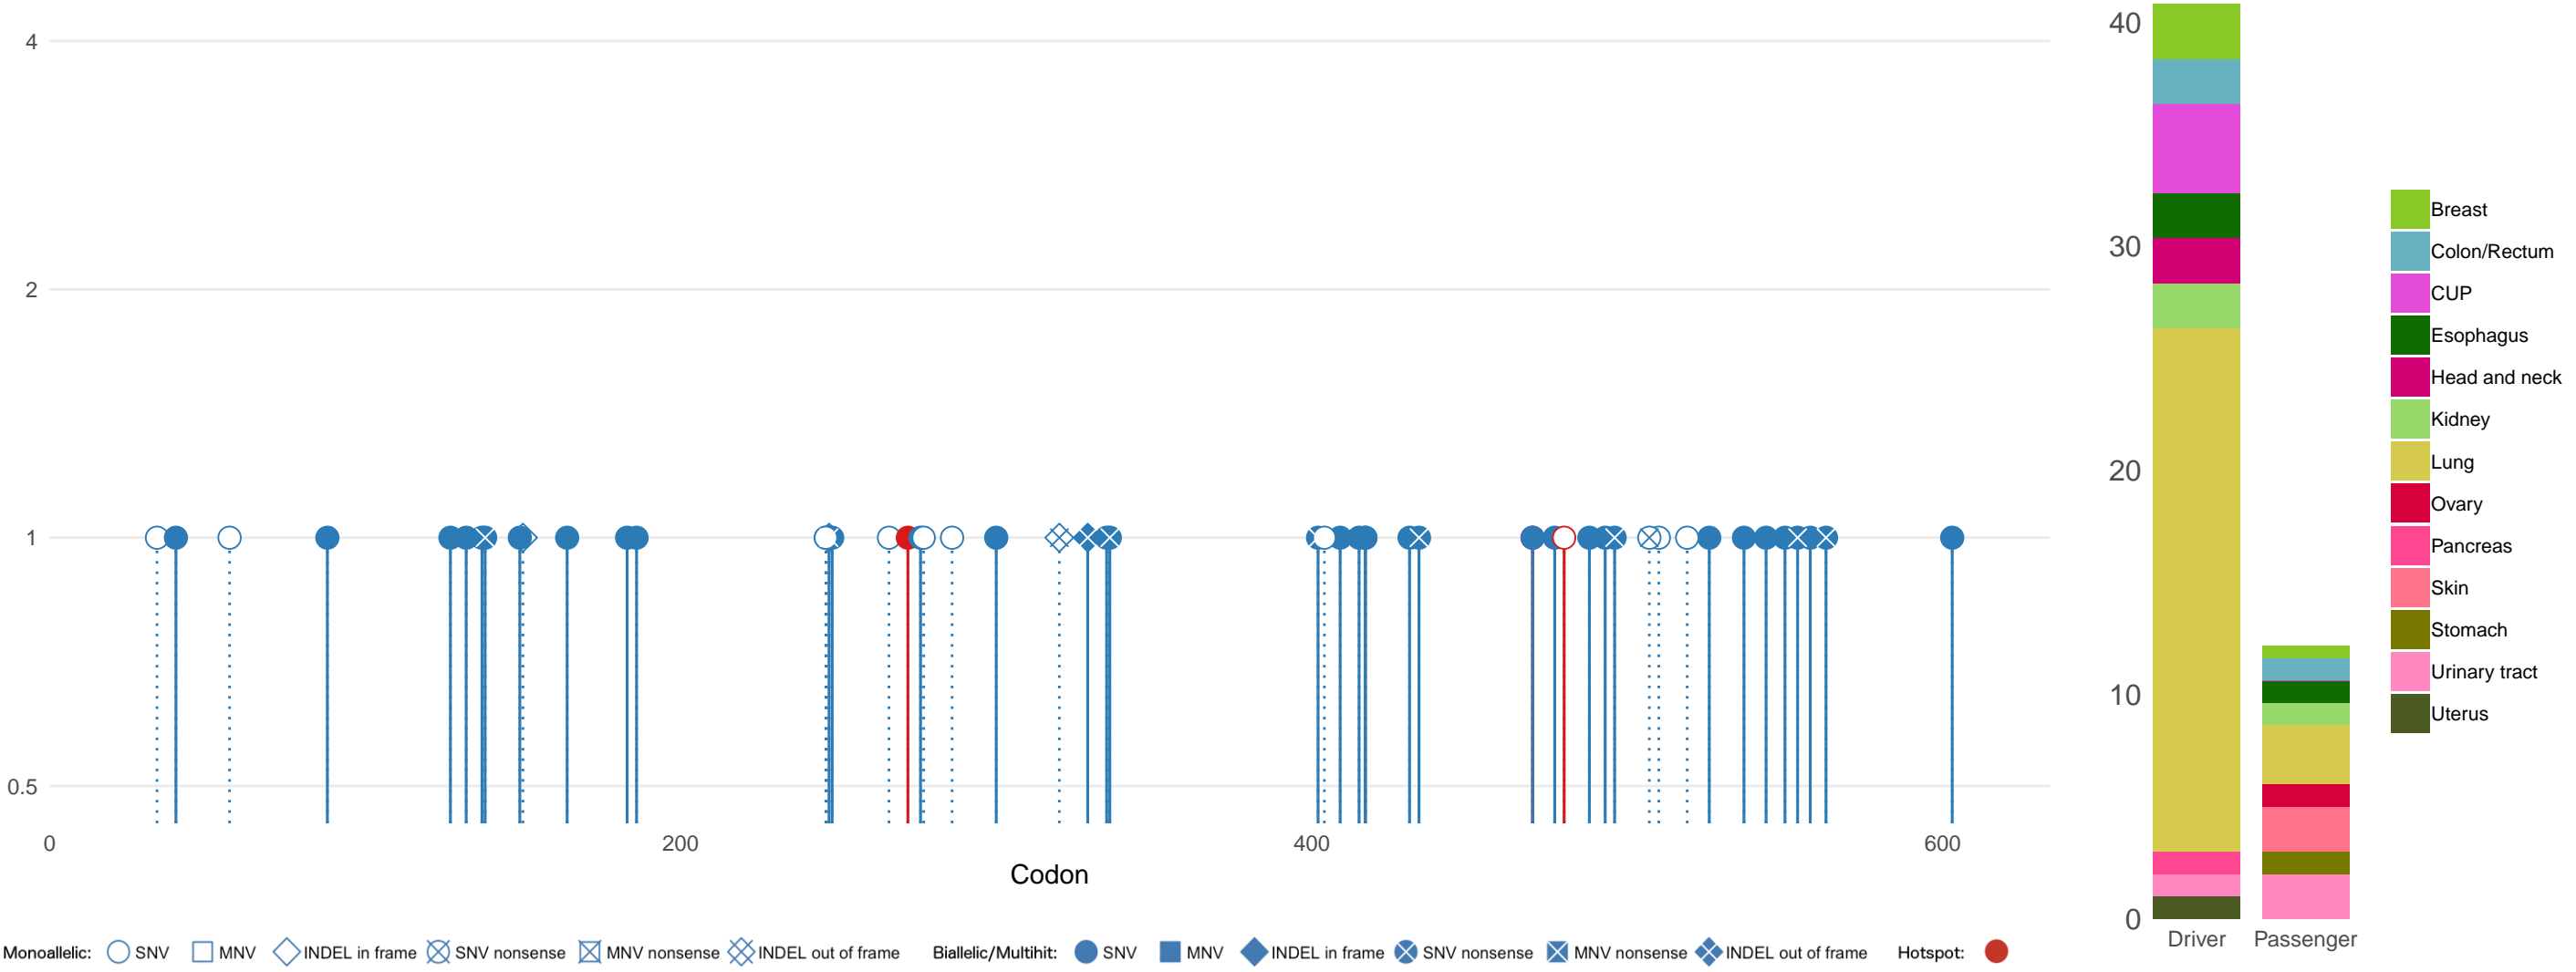

# KLF4 Variants

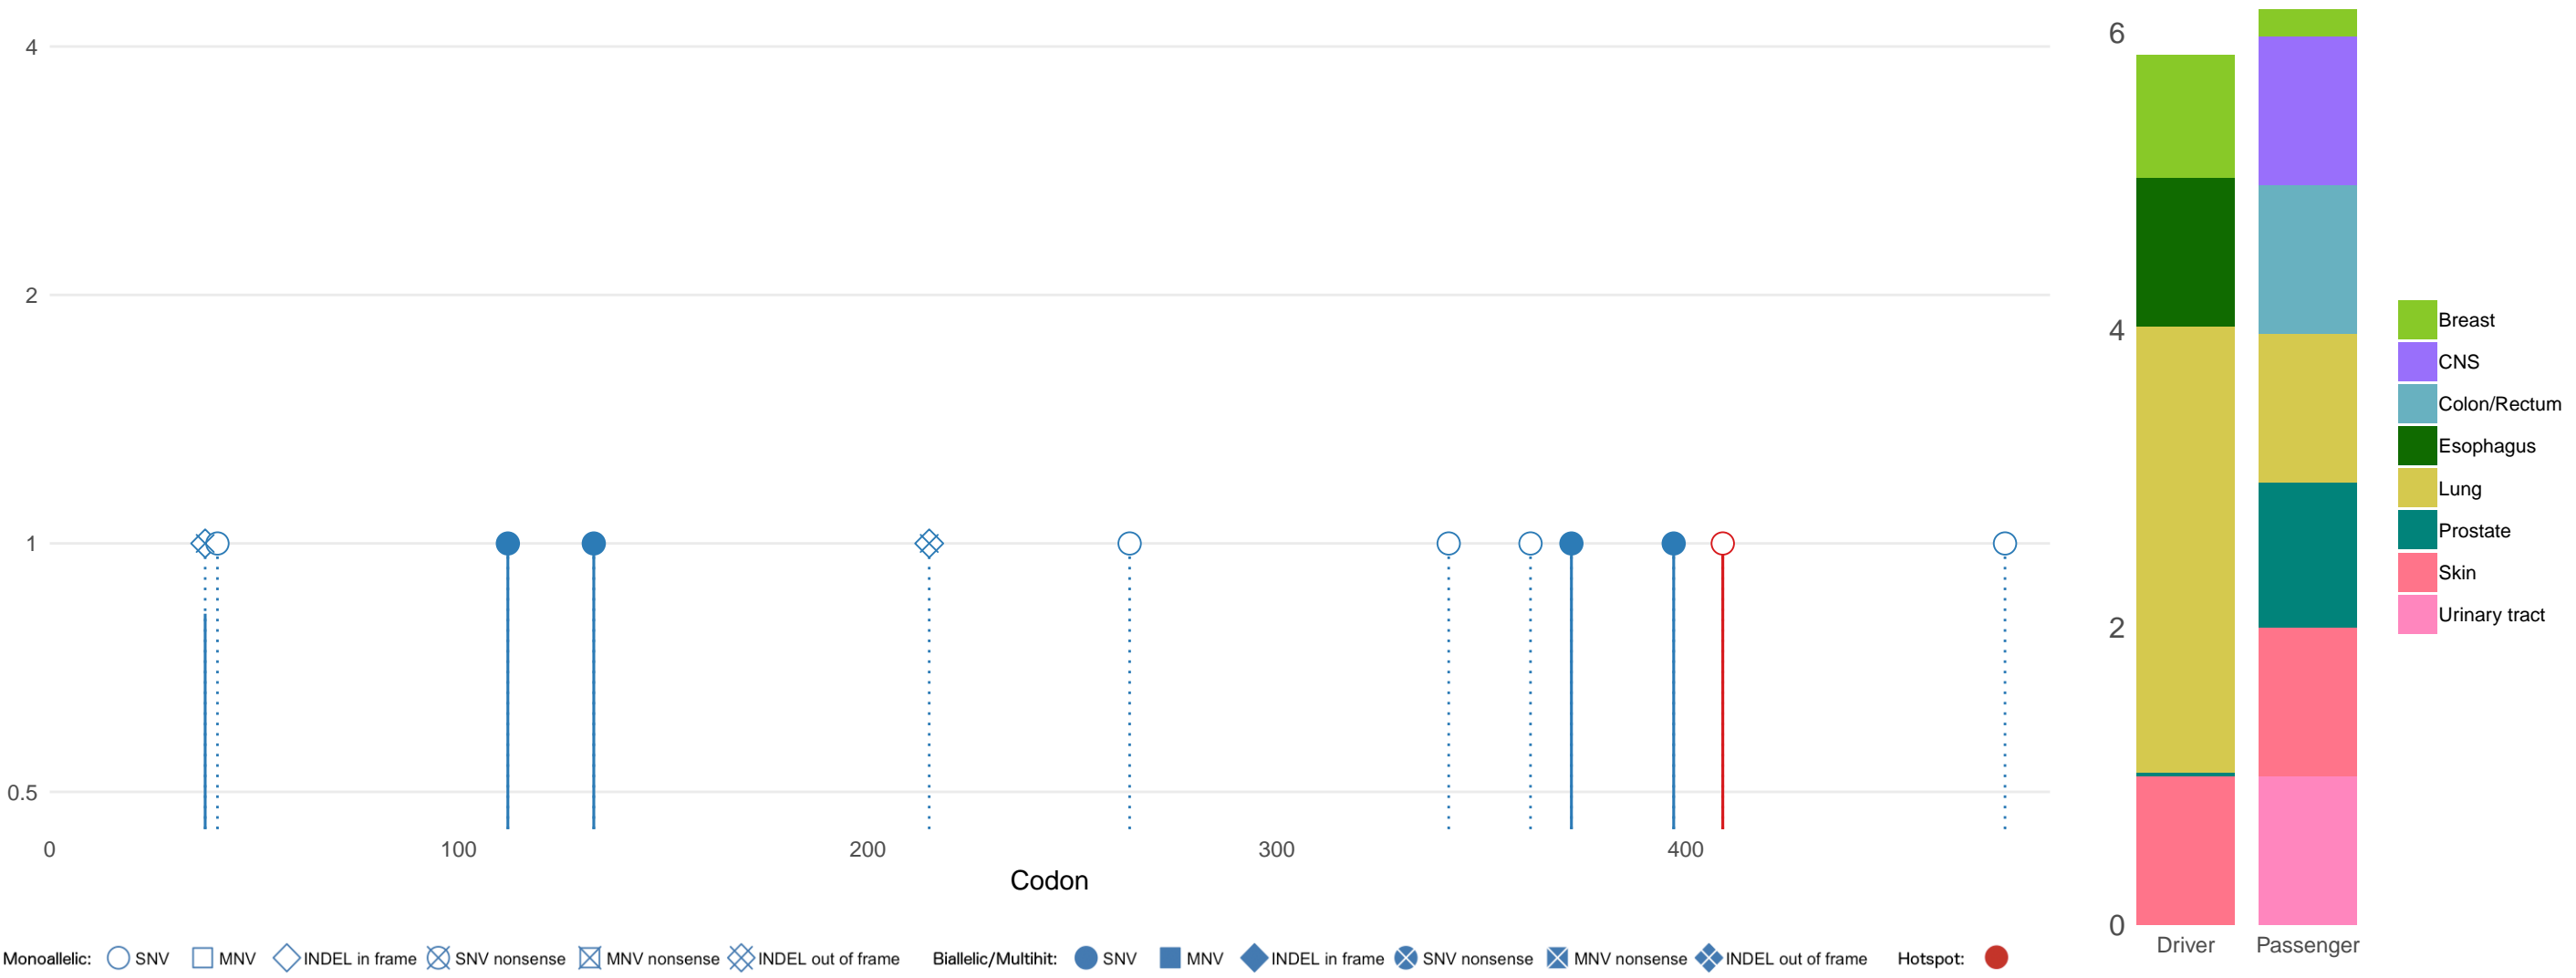

# KMT2A Variants

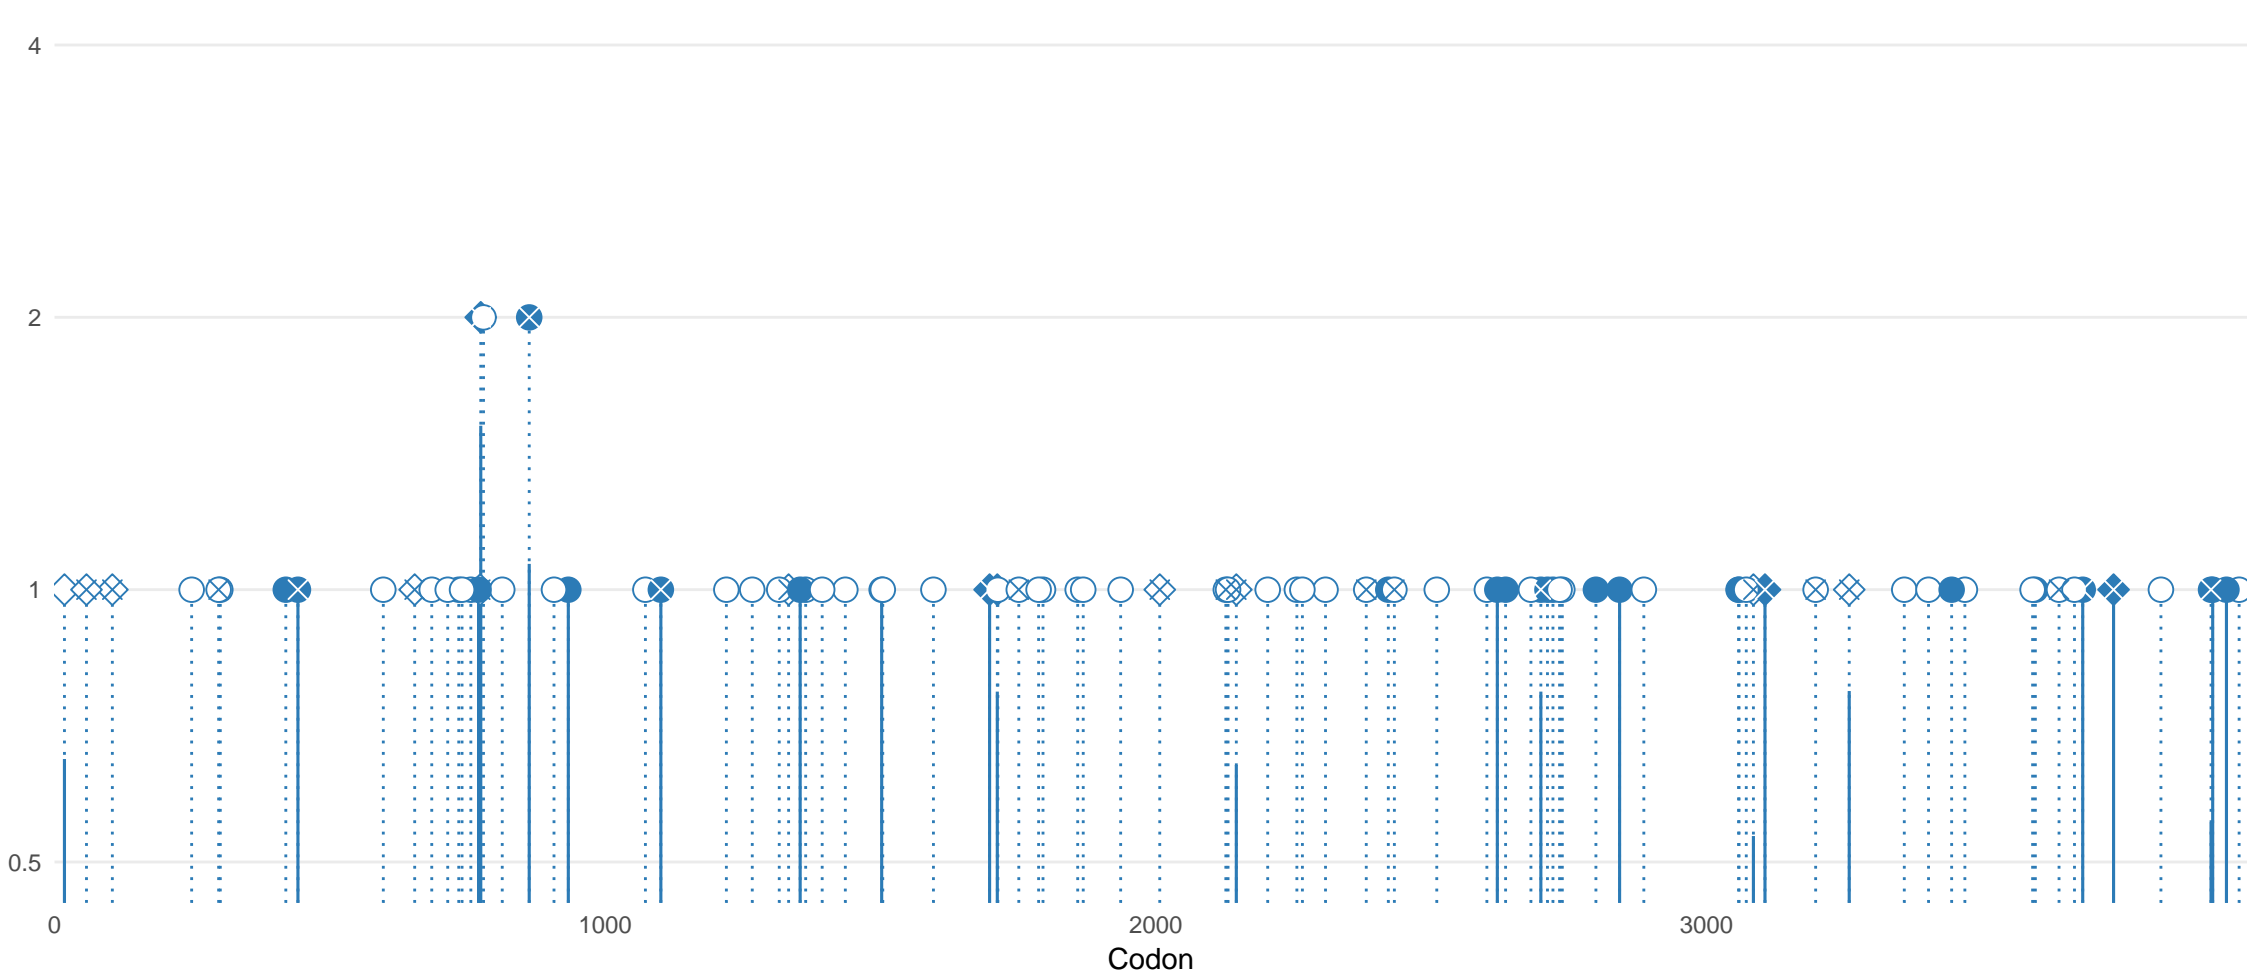

**Monoallelic:** ○ SNV □ MNV ◇ INDEL in frame ⊗ SNV nonsense ⊗ MNV nonsense ⊗ INDEL out of frame  
**Biallelic/Multihit:** ● SNV ■ MNV ◆ INDEL in frame ⊗ SNV nonsense ⊗ MNV nonsense ◆ INDEL out of frame  
**Hotspot:** ●

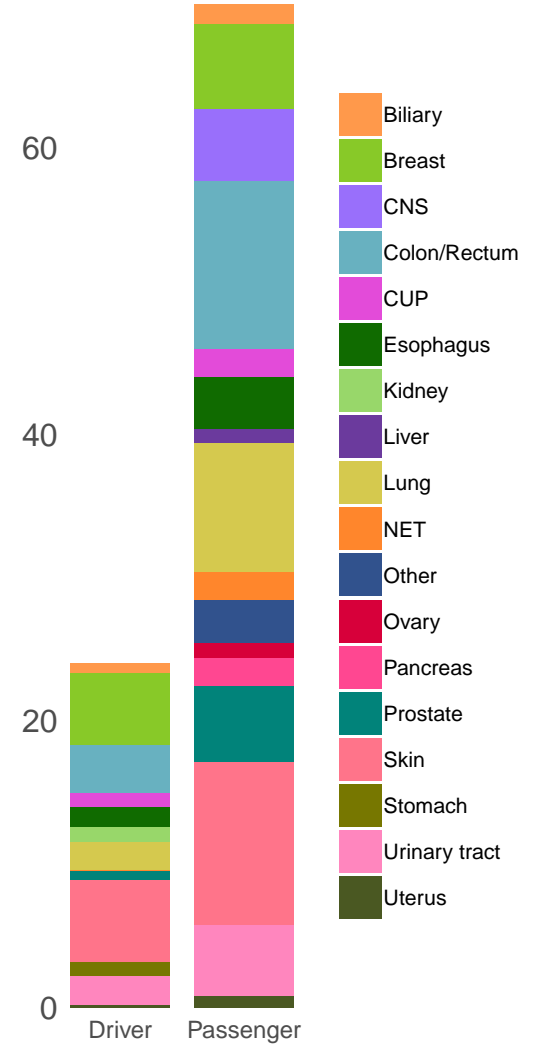

# KMT2B Variants

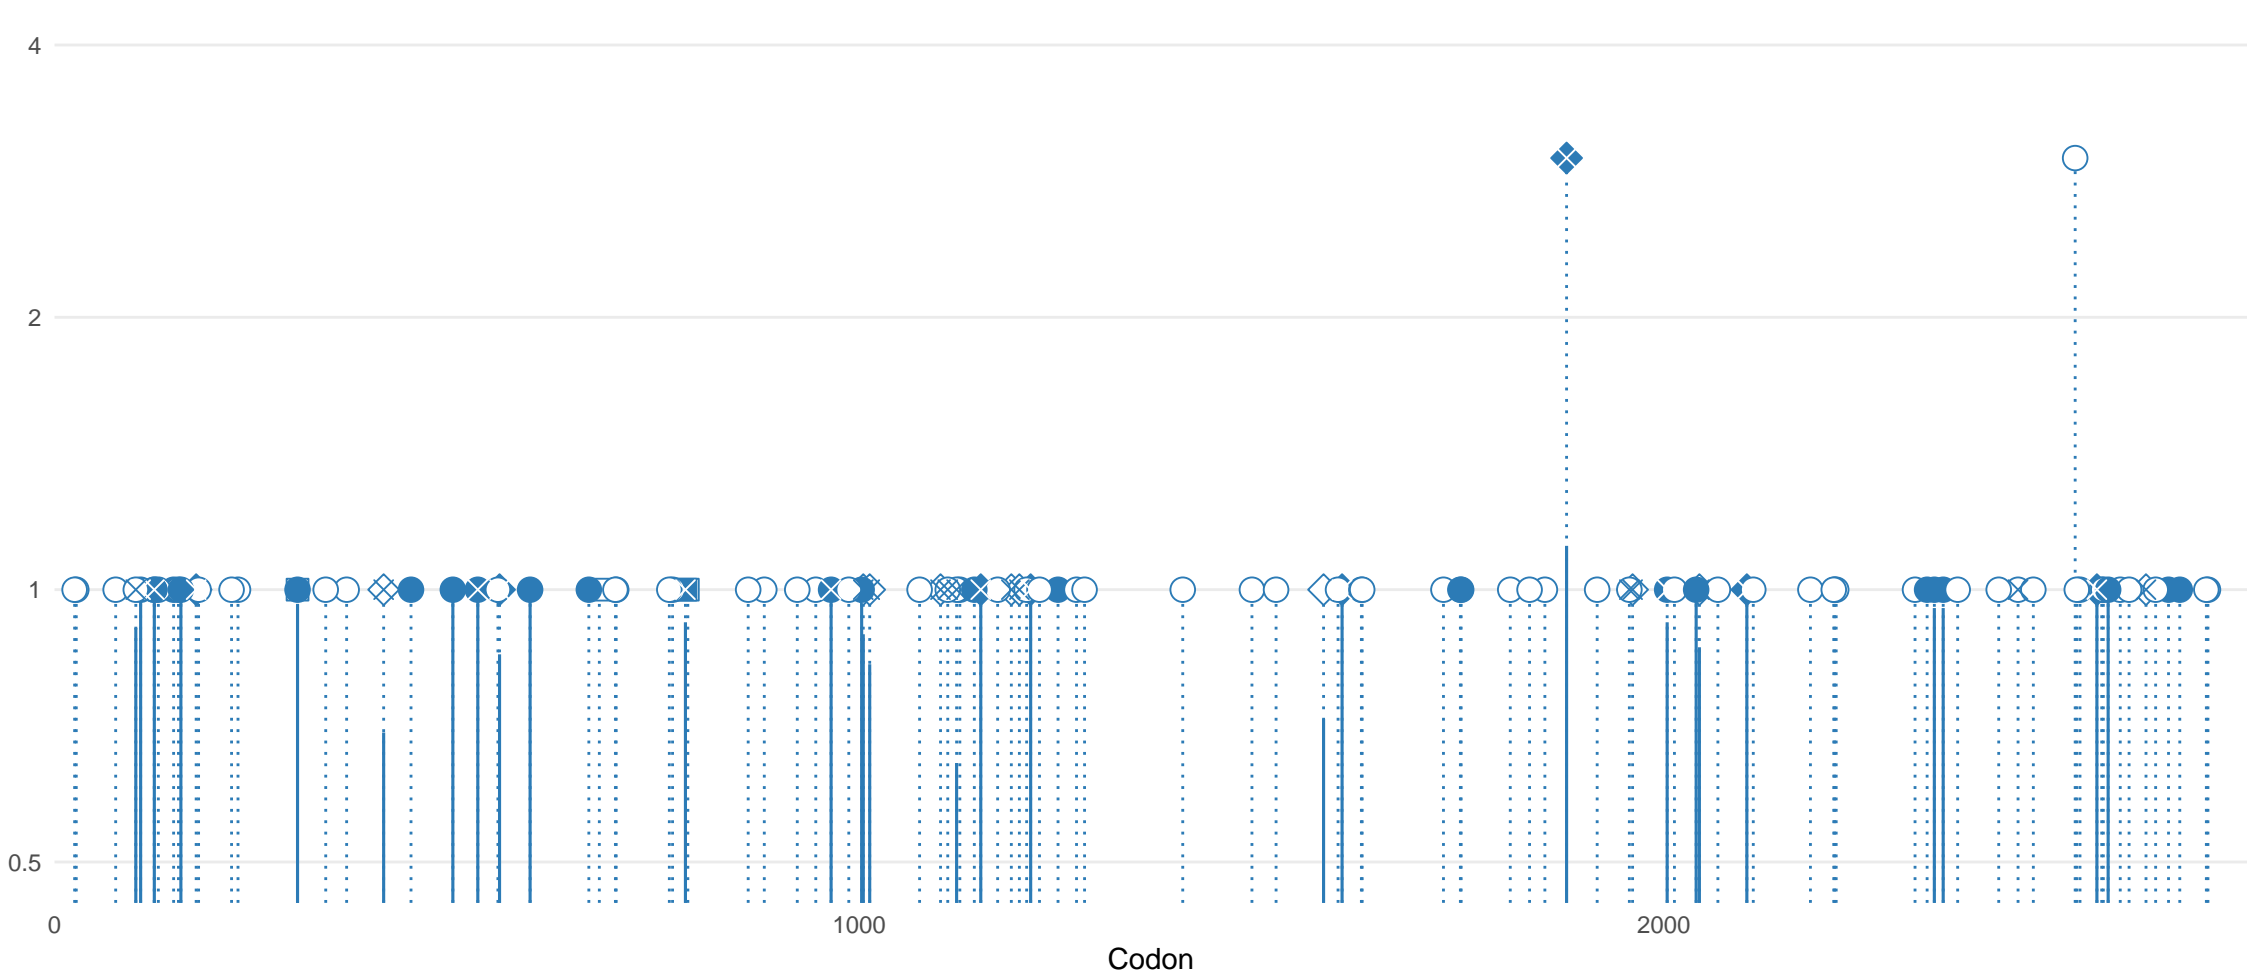

Monoallelic: ○ SNV □ MNV ◇ INDEL in frame ⊗ SNV nonsense ⊗ MNV nonsense ⊗ INDEL out of frame  
 Biallelic/Multihit: ● SNV ■ MNV ◆ INDEL in frame ⊗ SNV nonsense ⊗ MNV nonsense ◆ INDEL out of frame  
 Hotspot: ●

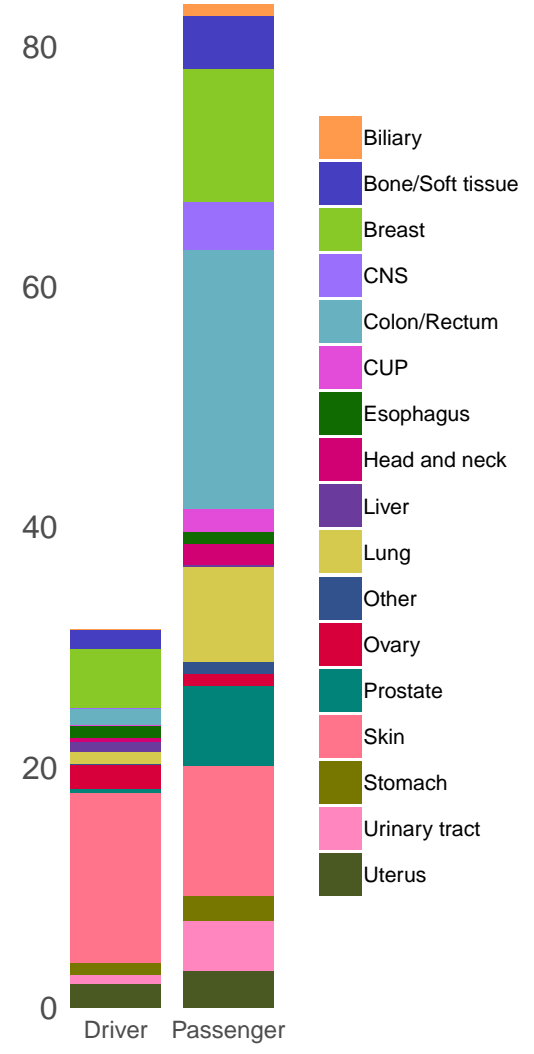

Driver Passenger

# KMT2C Variants

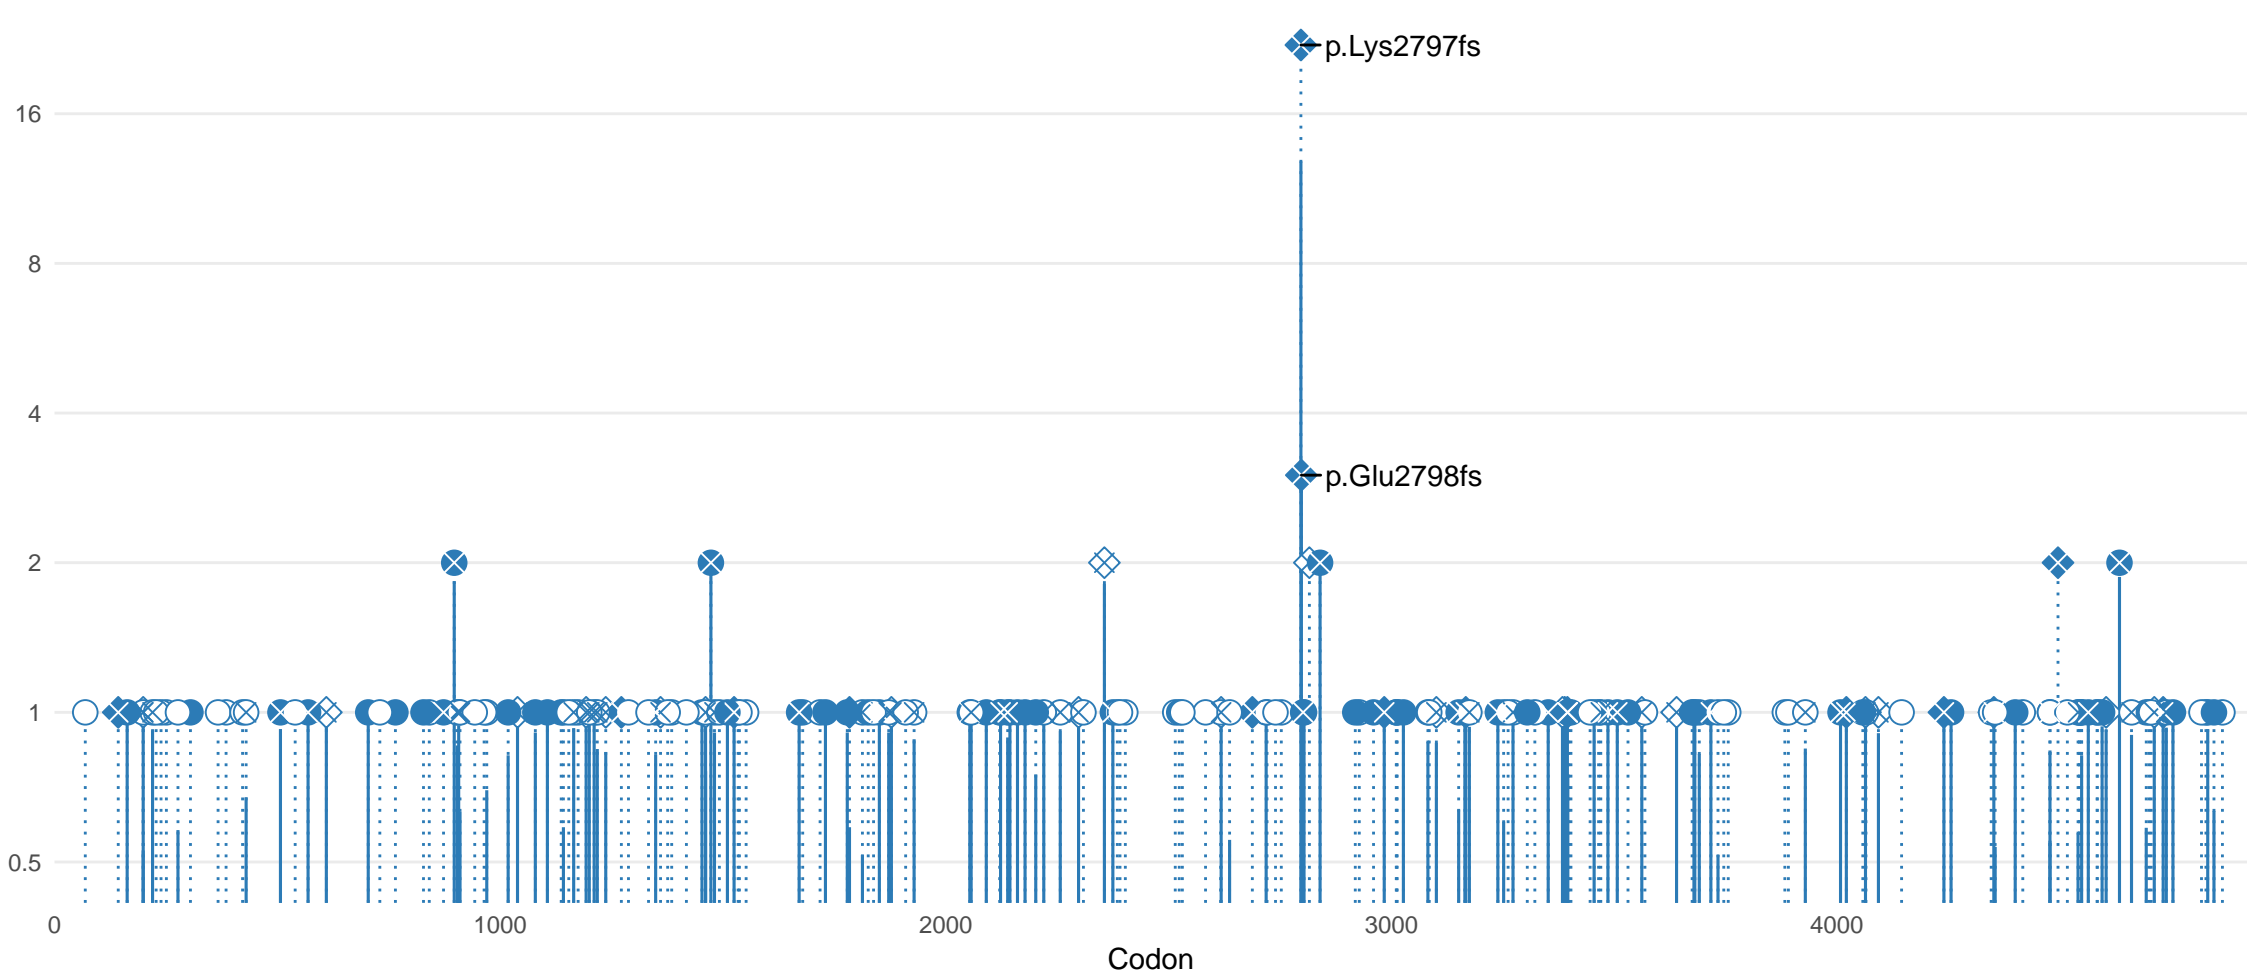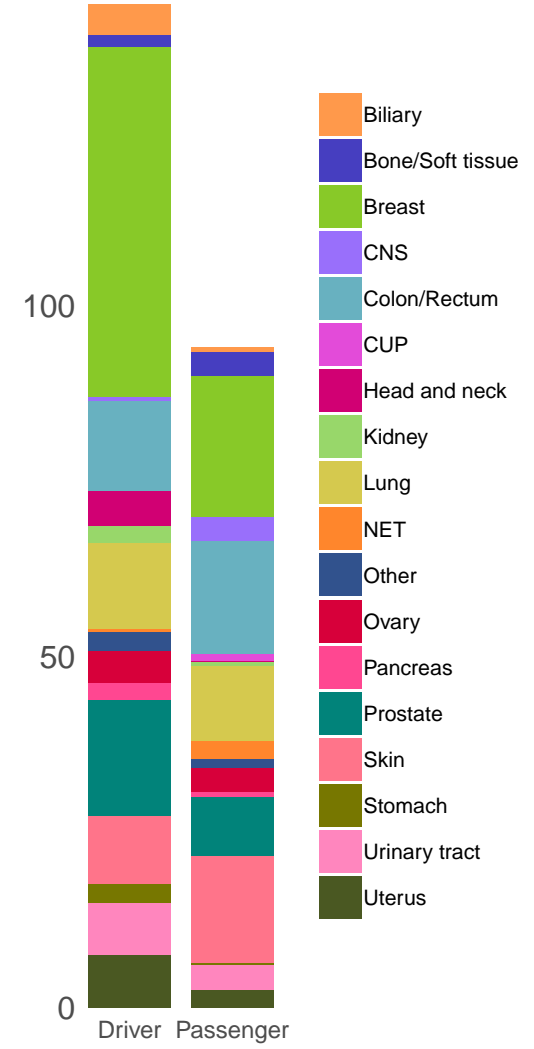

**Monoallelic:** ○ SNV □ MNV ◇ INDEL in frame ⊗ SNV nonsense ⊗ MNV nonsense ⊗ INDEL out of frame  
**Biallelic/Multihit:** ● SNV ■ MNV ◆ INDEL in frame ⊗ SNV nonsense ⊗ MNV nonsense ◆ INDEL out of frame  
**Hotspot:** ●

# KMT2D Variants

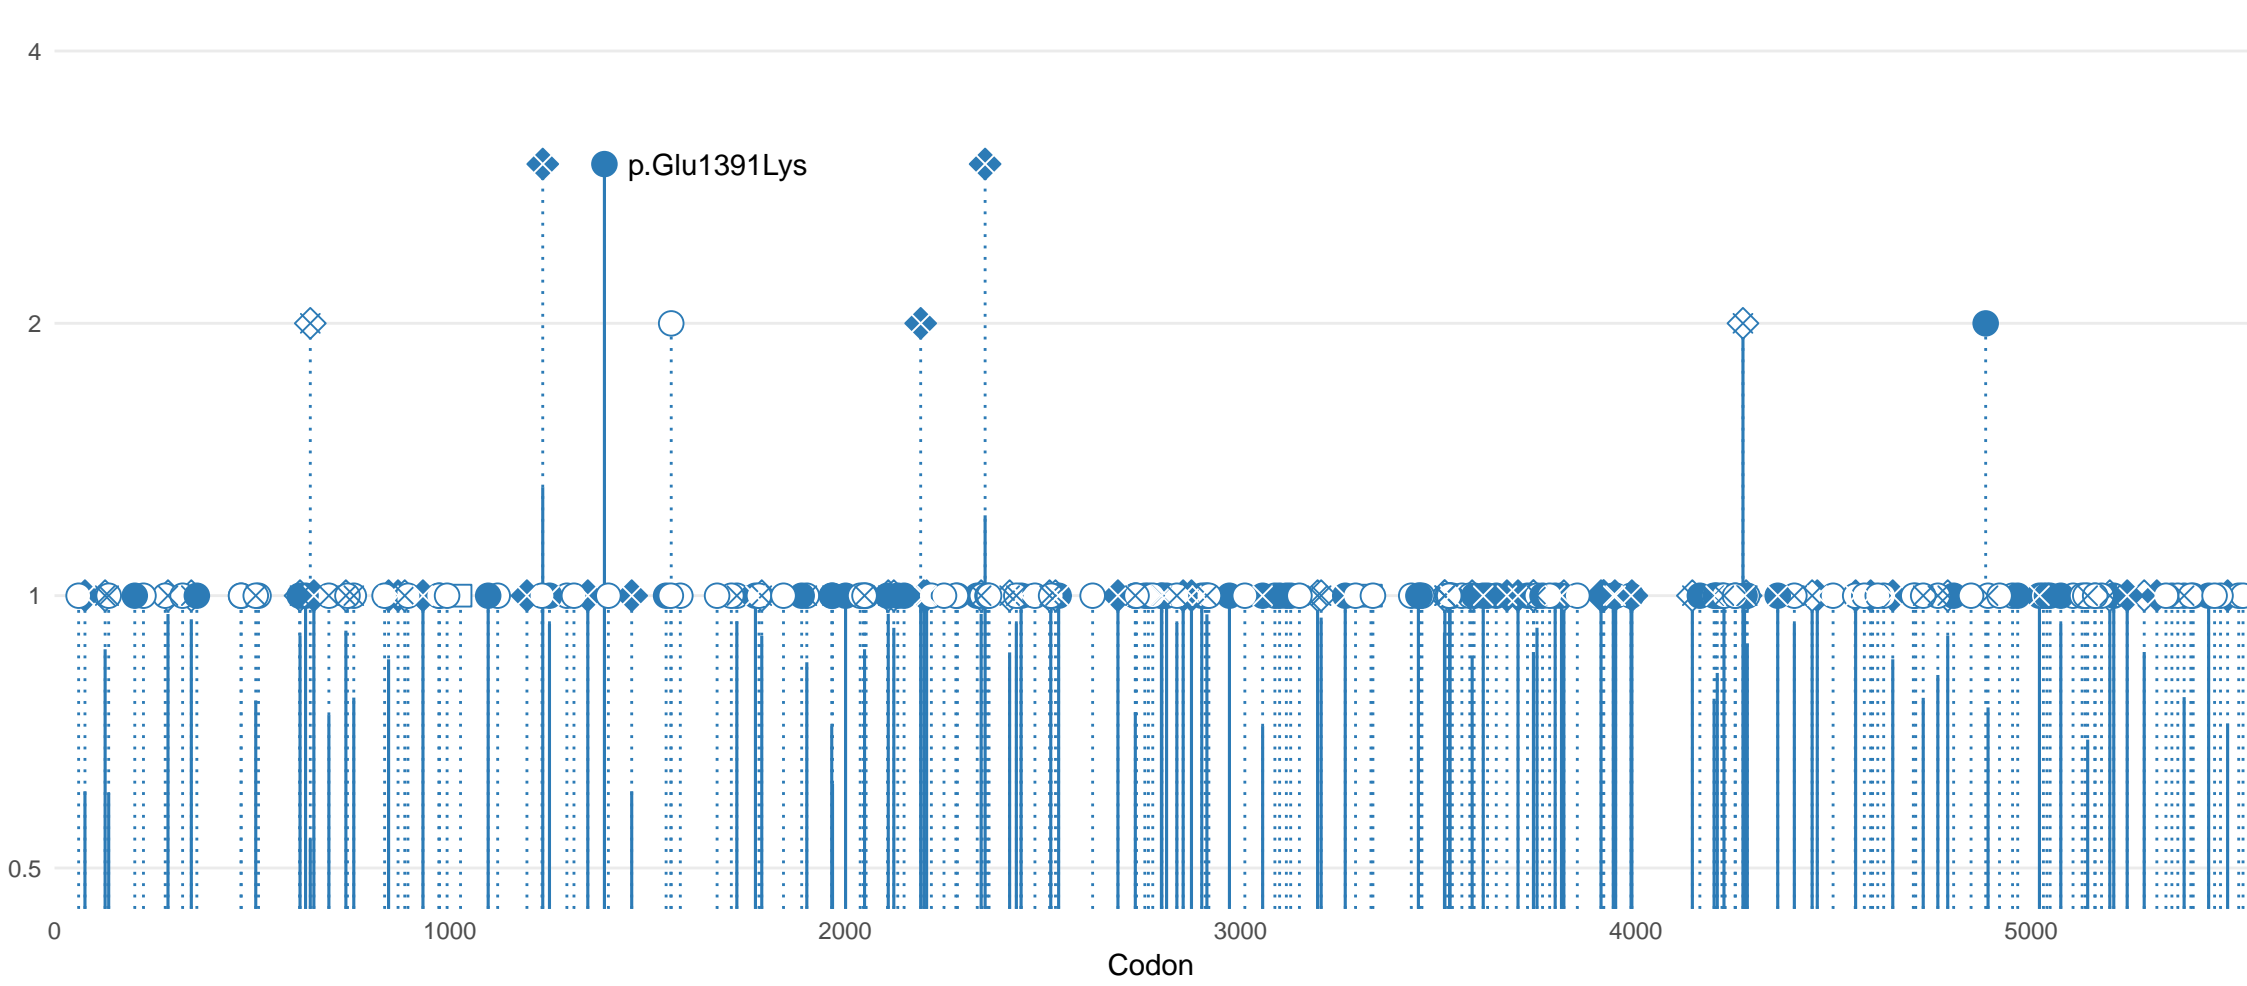

**Monoallelic:** ○ SNV □ MNV ◇ INDEL in frame ⊗ SNV nonsense ⊗ MNV nonsense ⊗ INDEL out of frame  
**Biallelic/Multihit:** ● SNV ■ MNV ◆ INDEL in frame ⊗ SNV nonsense ⊗ MNV nonsense ◆ INDEL out of frame  
**Hotspot:** ●

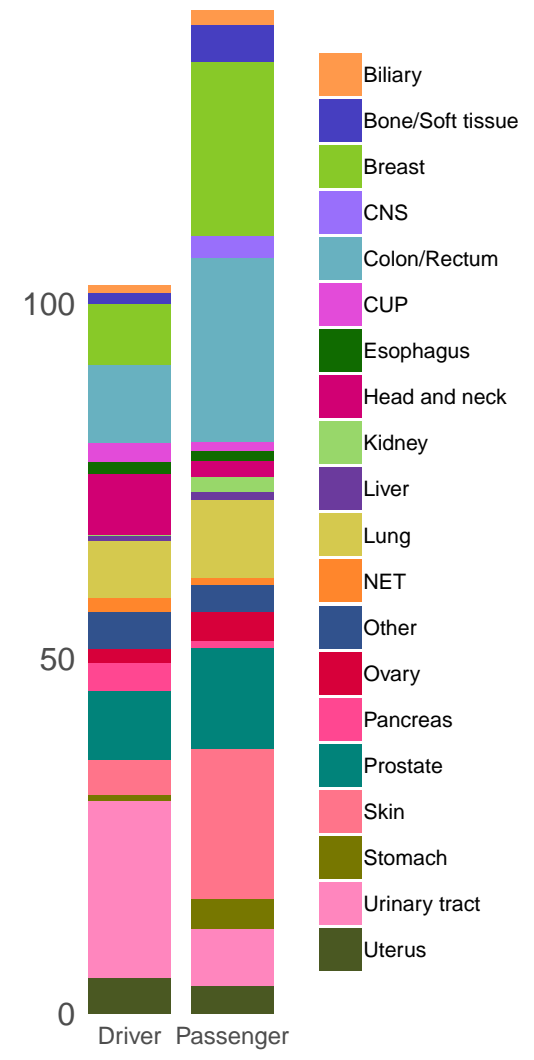

0 50 100  
Driver Passenger

# LATS2 Variants

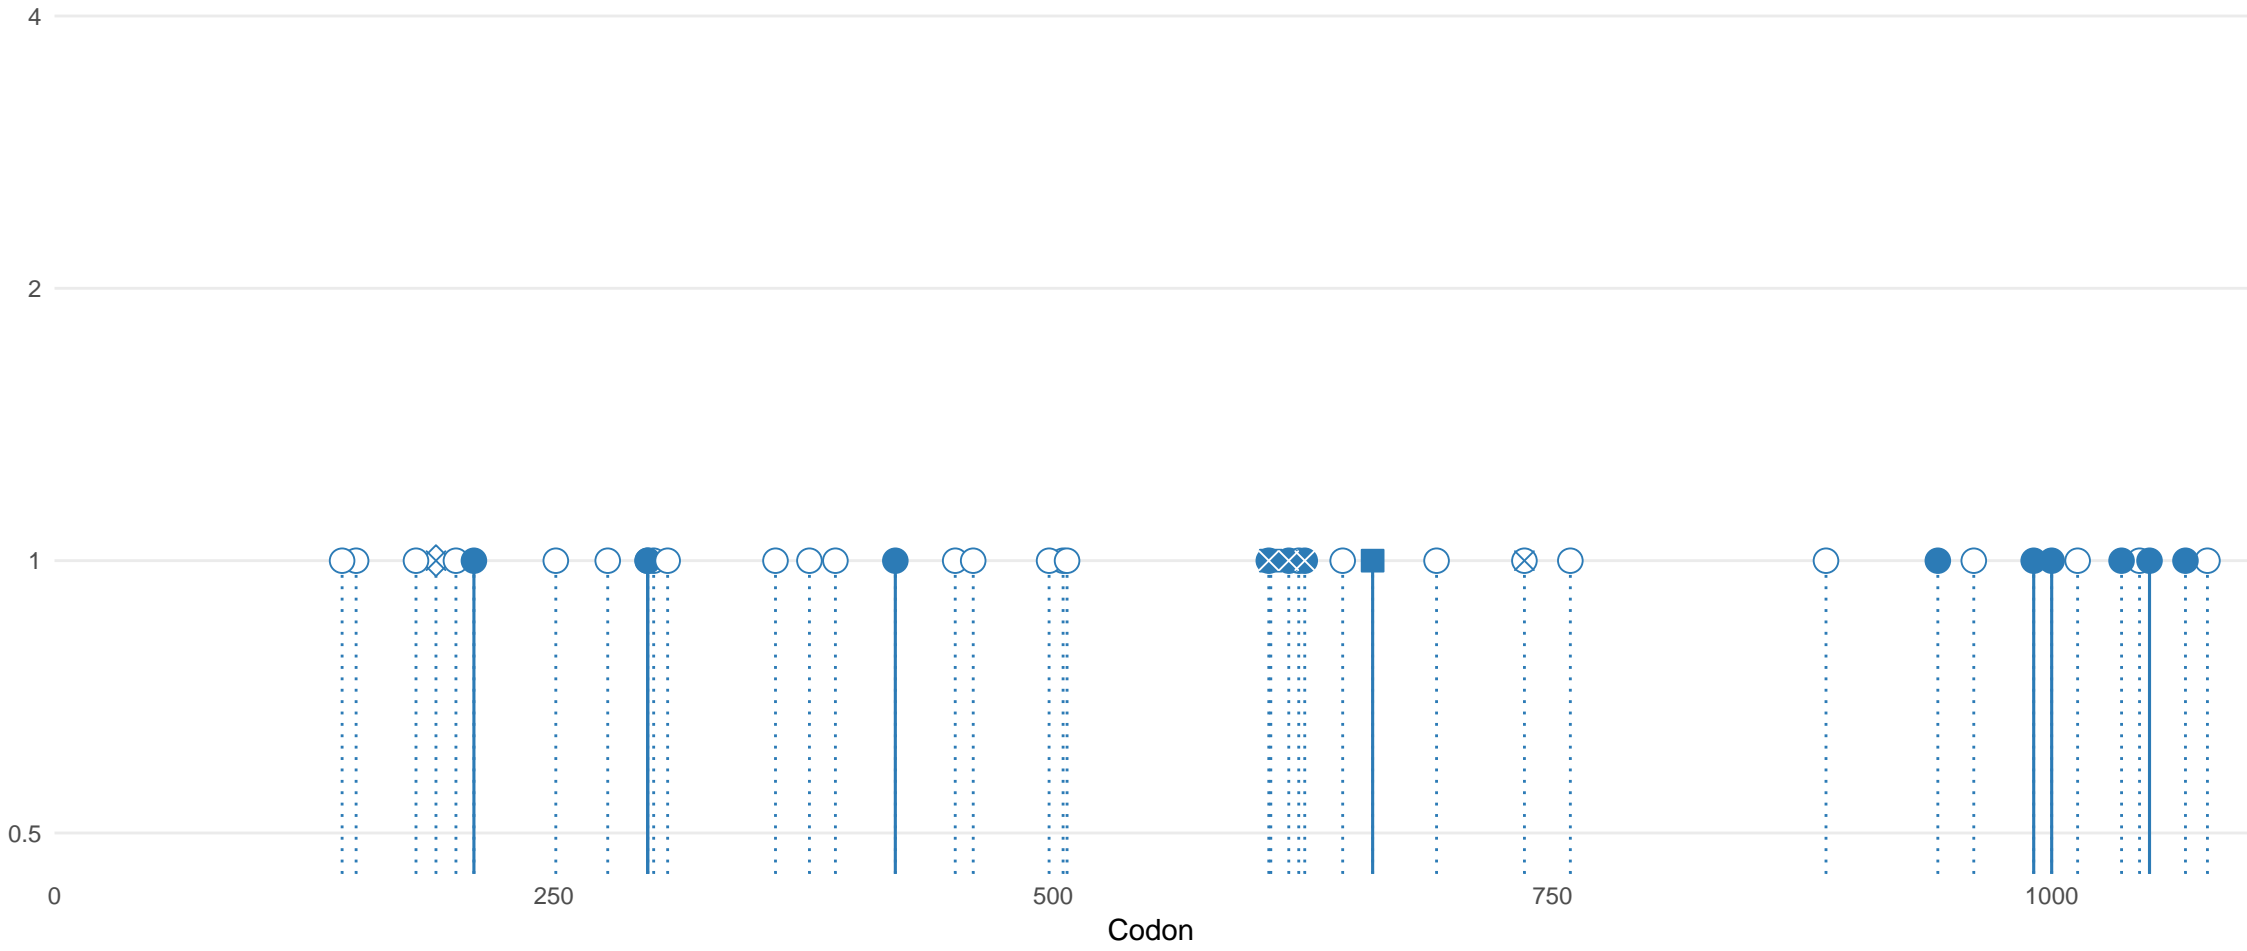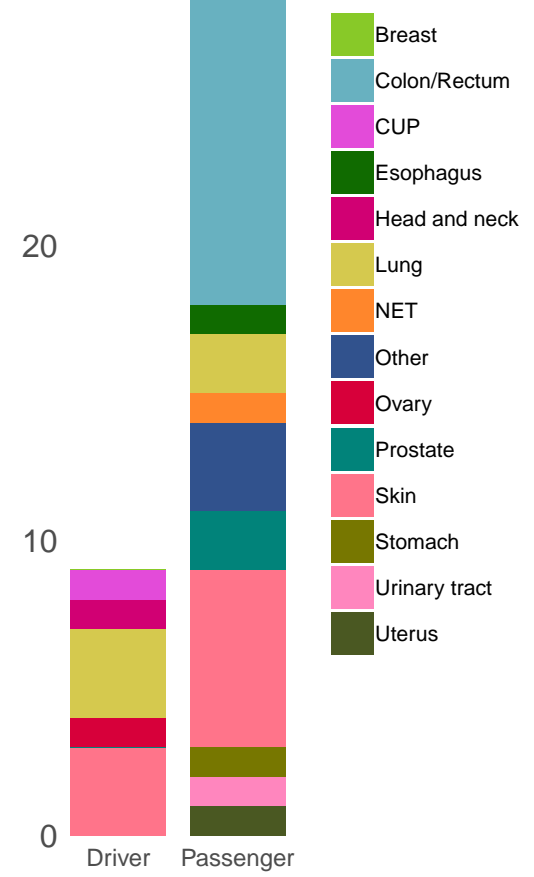



# LZTR1 Variants

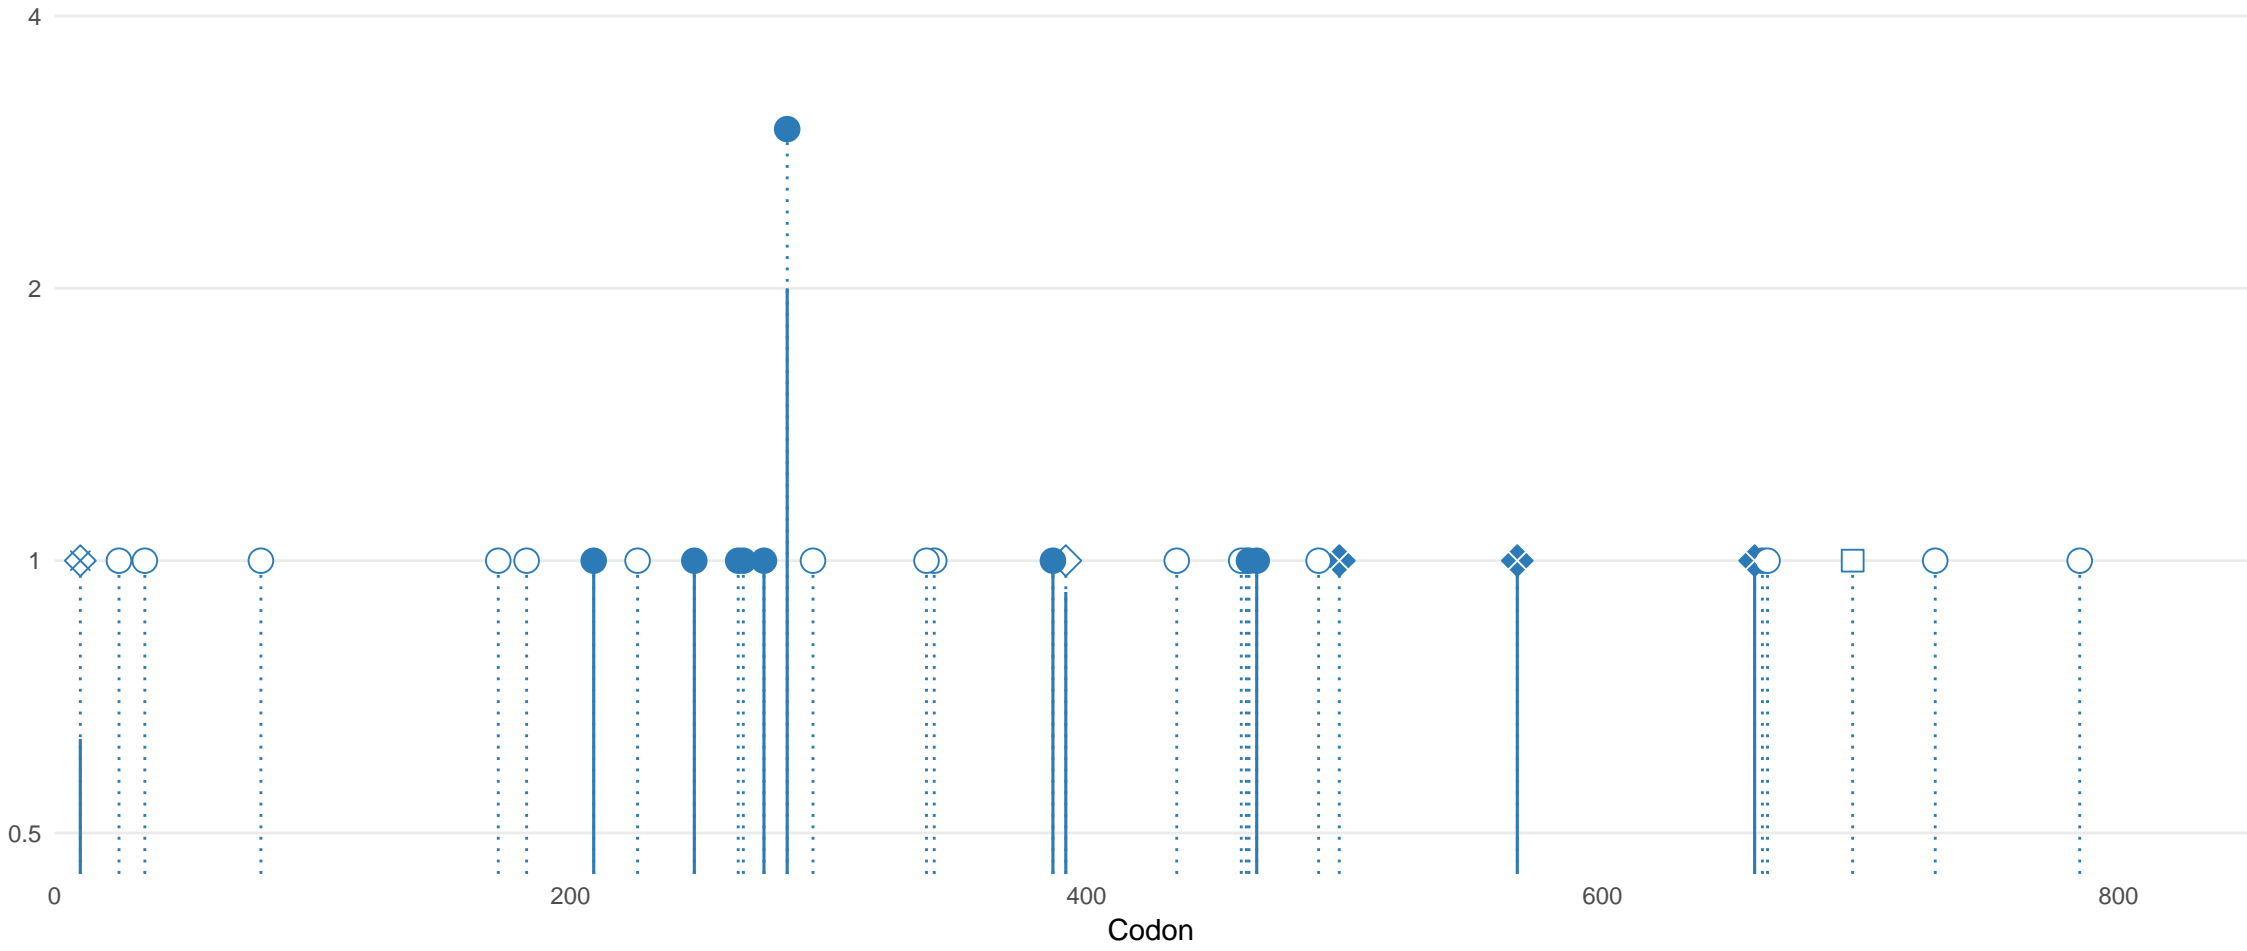

**Monoallelic:** ○ SNV □ MNV ◇ INDEL in frame ⊗ SNV nonsense ⊗ MNV nonsense ⊗ INDEL out of frame  
**Biallelic/Multihit:** ● SNV ■ MNV ◆ INDEL in frame ⊗ SNV nonsense ⊗ MNV nonsense ◆ INDEL out of frame  
**Hotspot:** ●

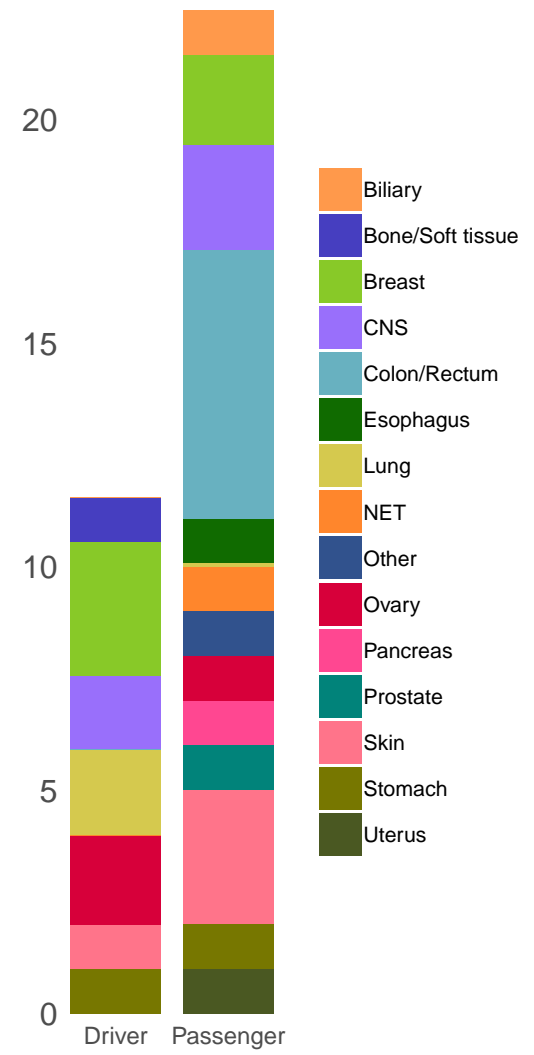

# MAP2K4 Variants

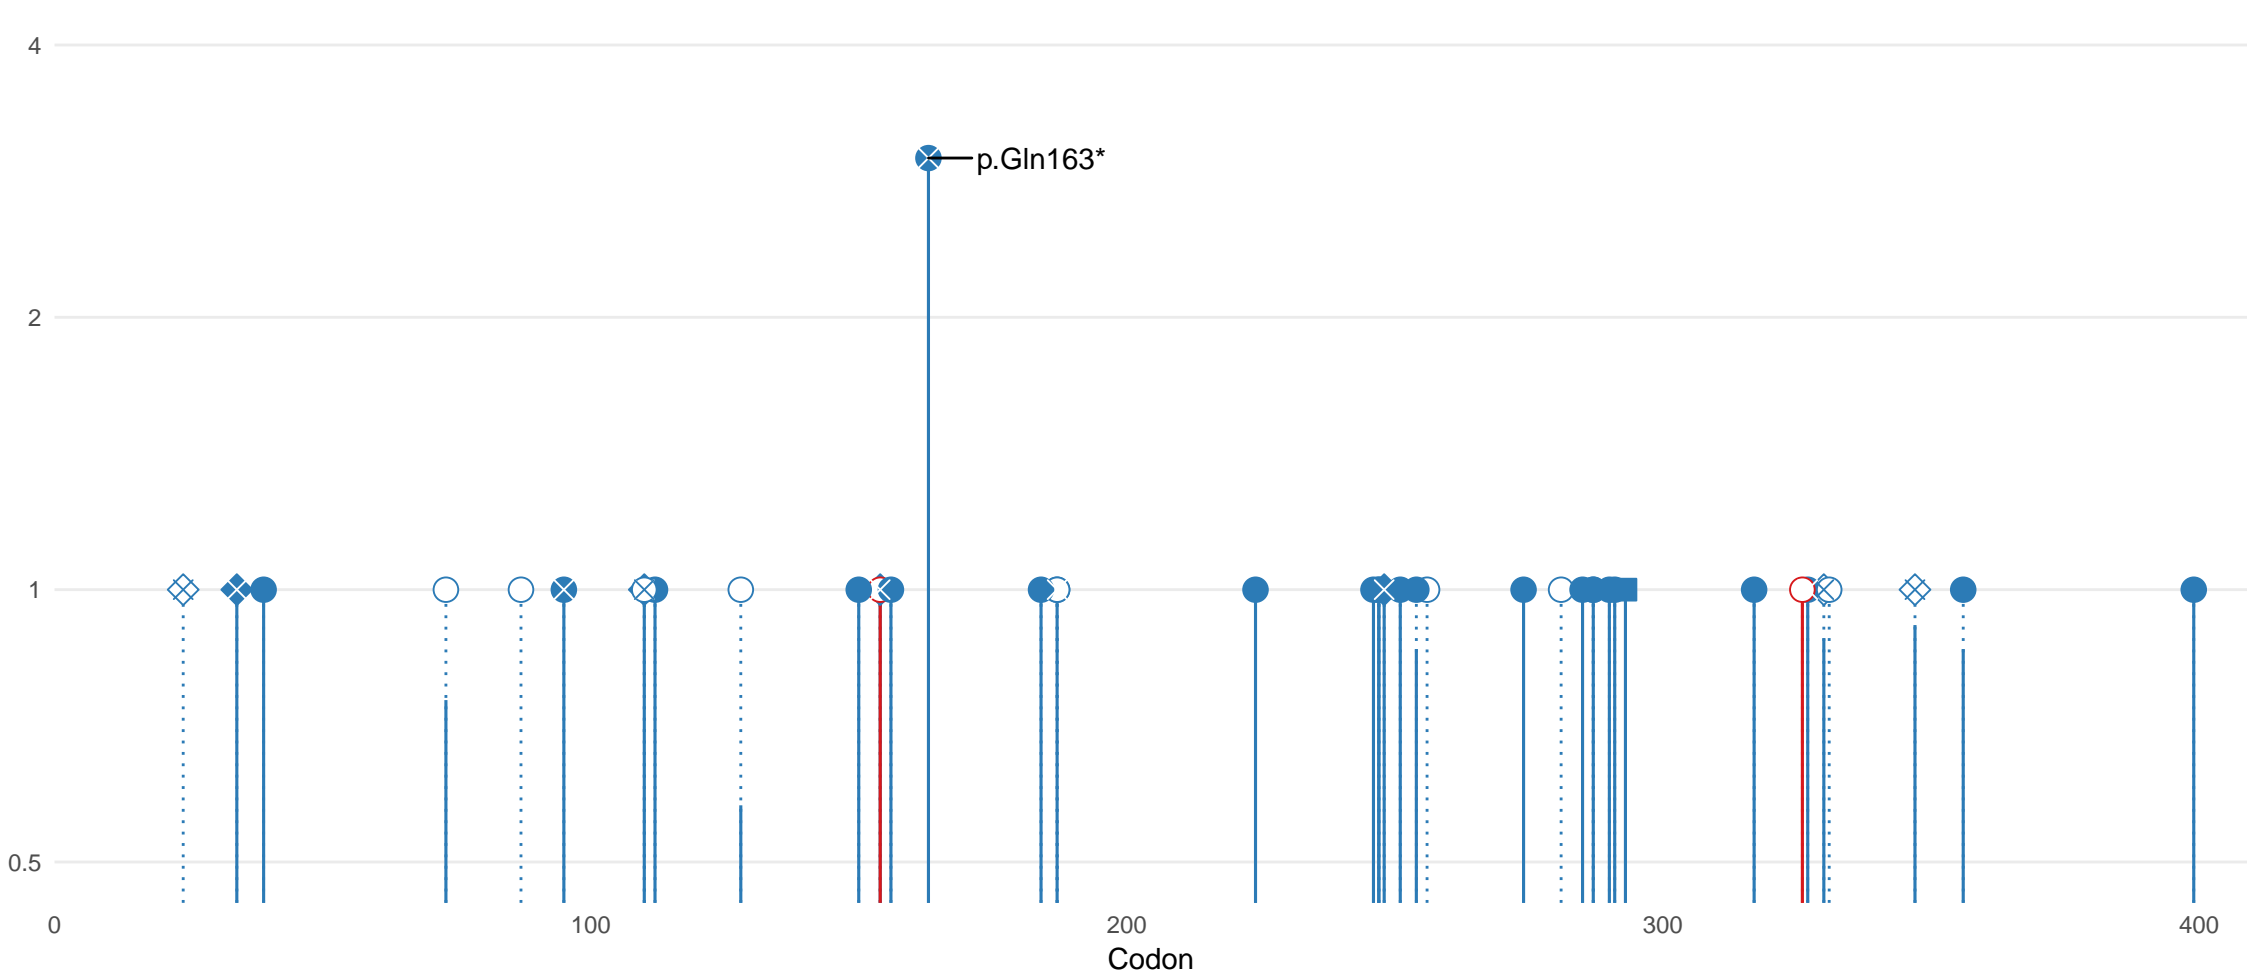

Monoallelic: ○ SNV □ MNV ◇ INDEL in frame ⊗ SNV nonsense ⊗ MNV nonsense ⊗ INDEL out of frame  
 Biallelic/Multihit: ● SNV ■ MNV ◆ INDEL in frame ⊗ SNV nonsense ⊗ MNV nonsense ◆ INDEL out of frame  
 Hotspot: ●

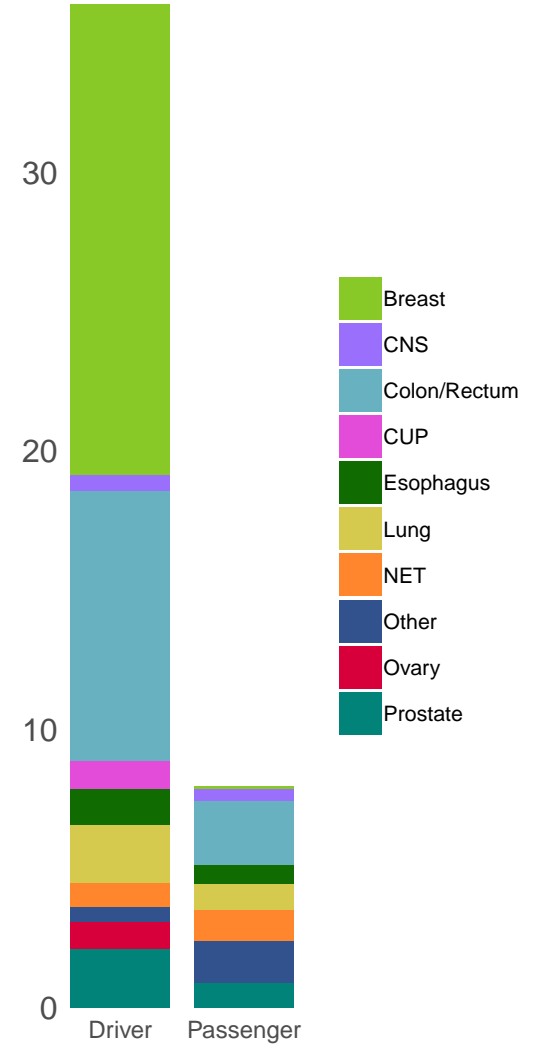

# MAP2K7 Variants

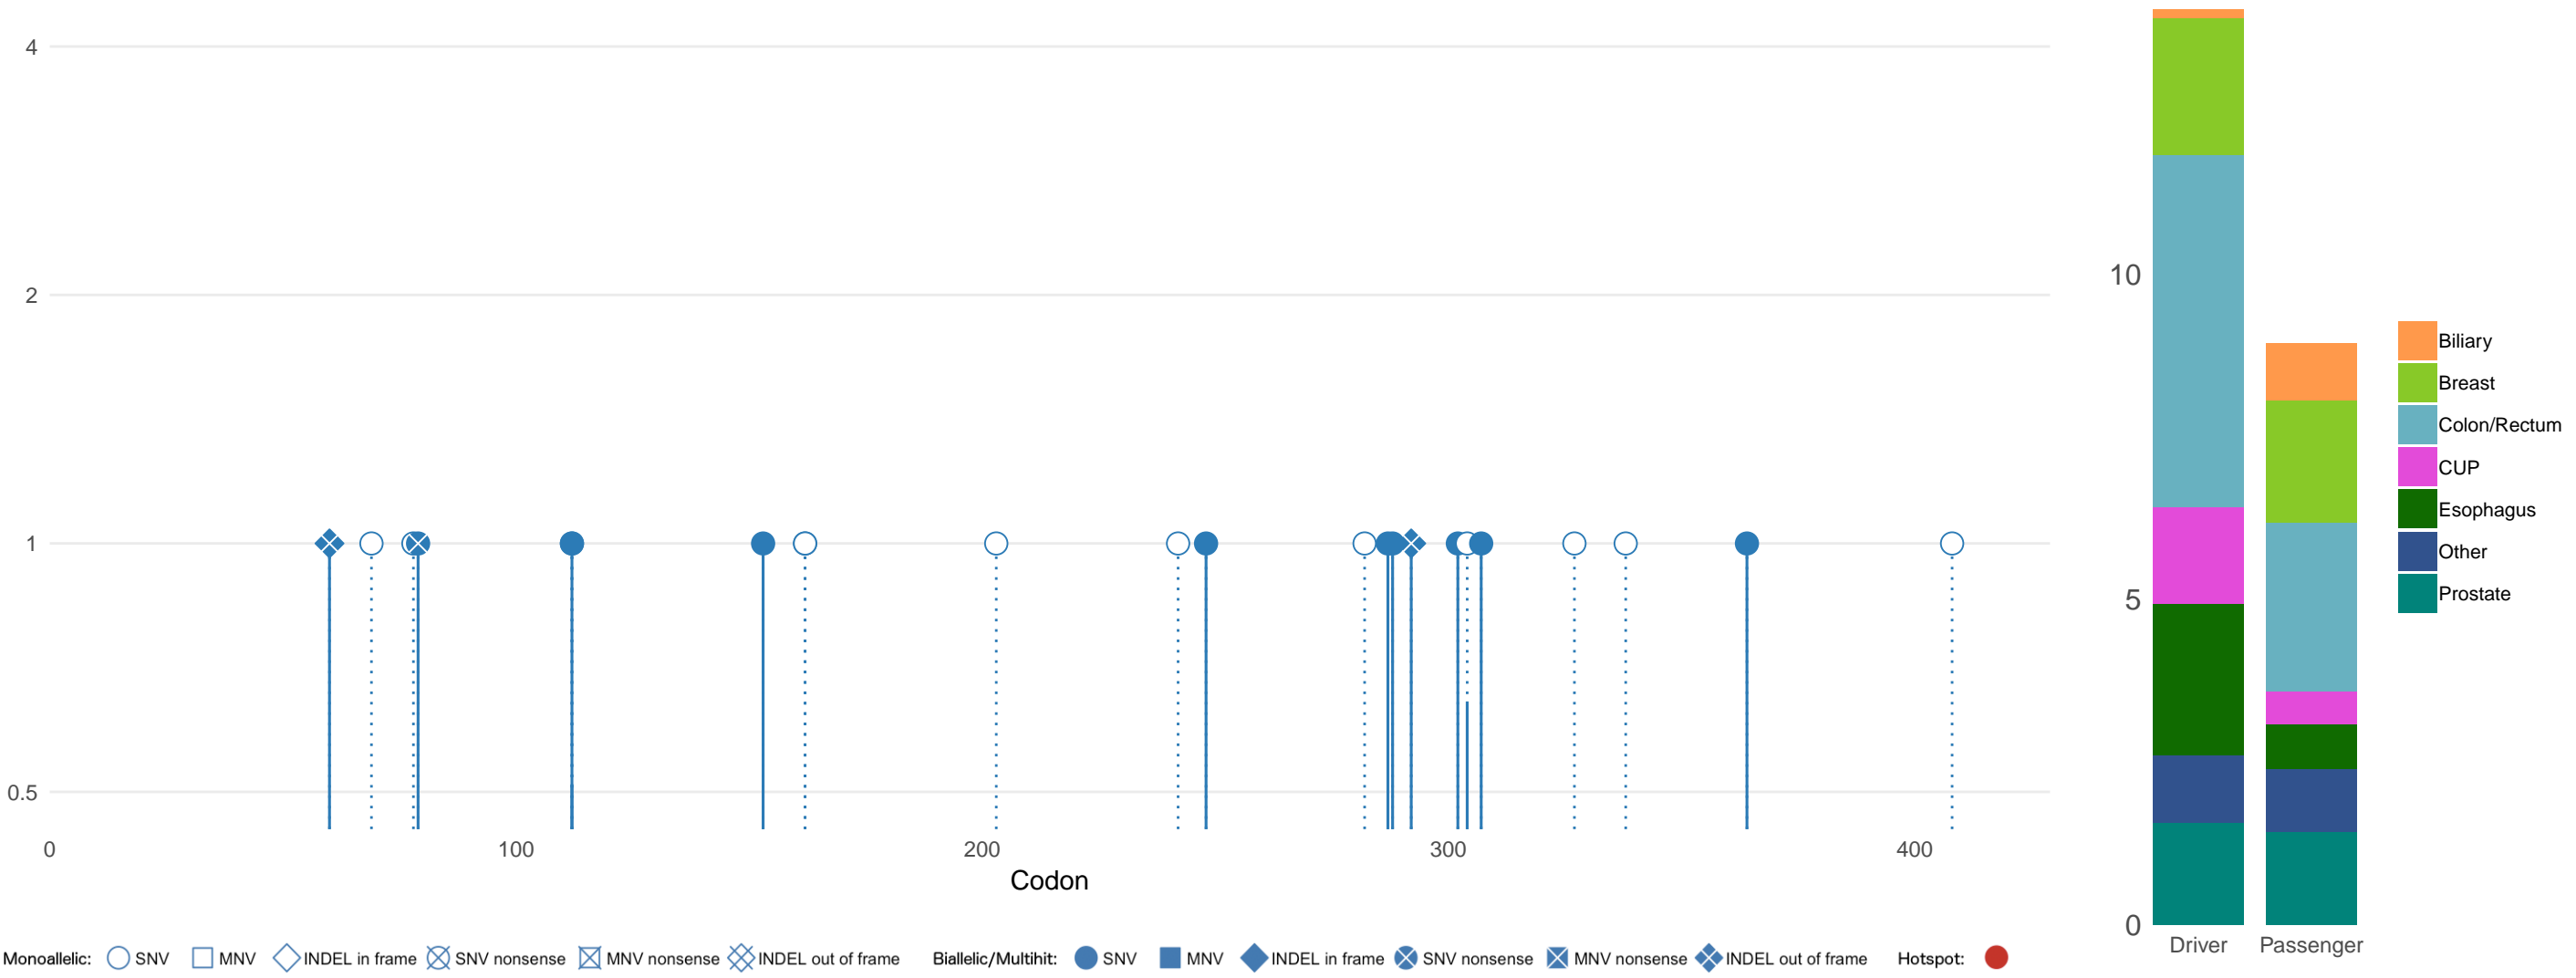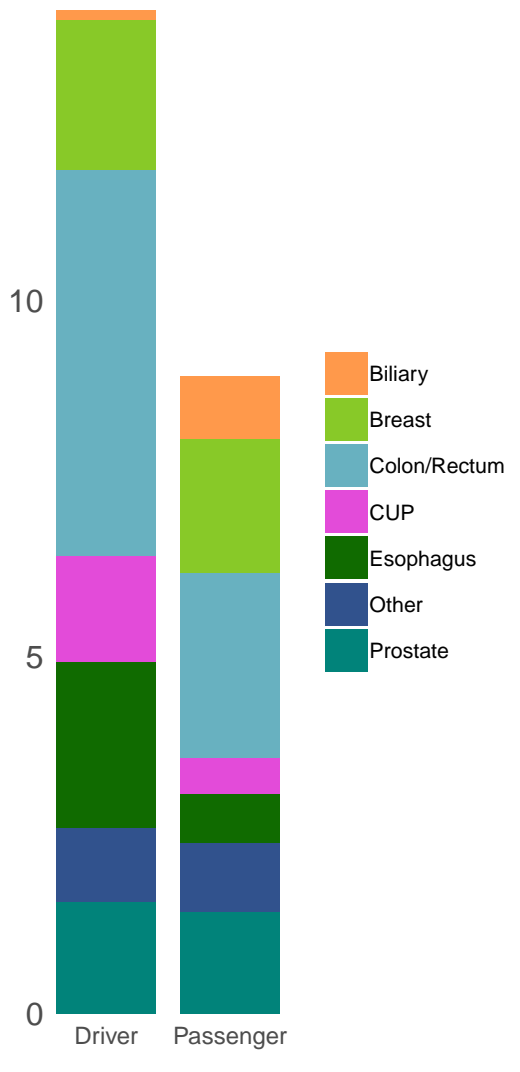

# MAP3K1 Variants

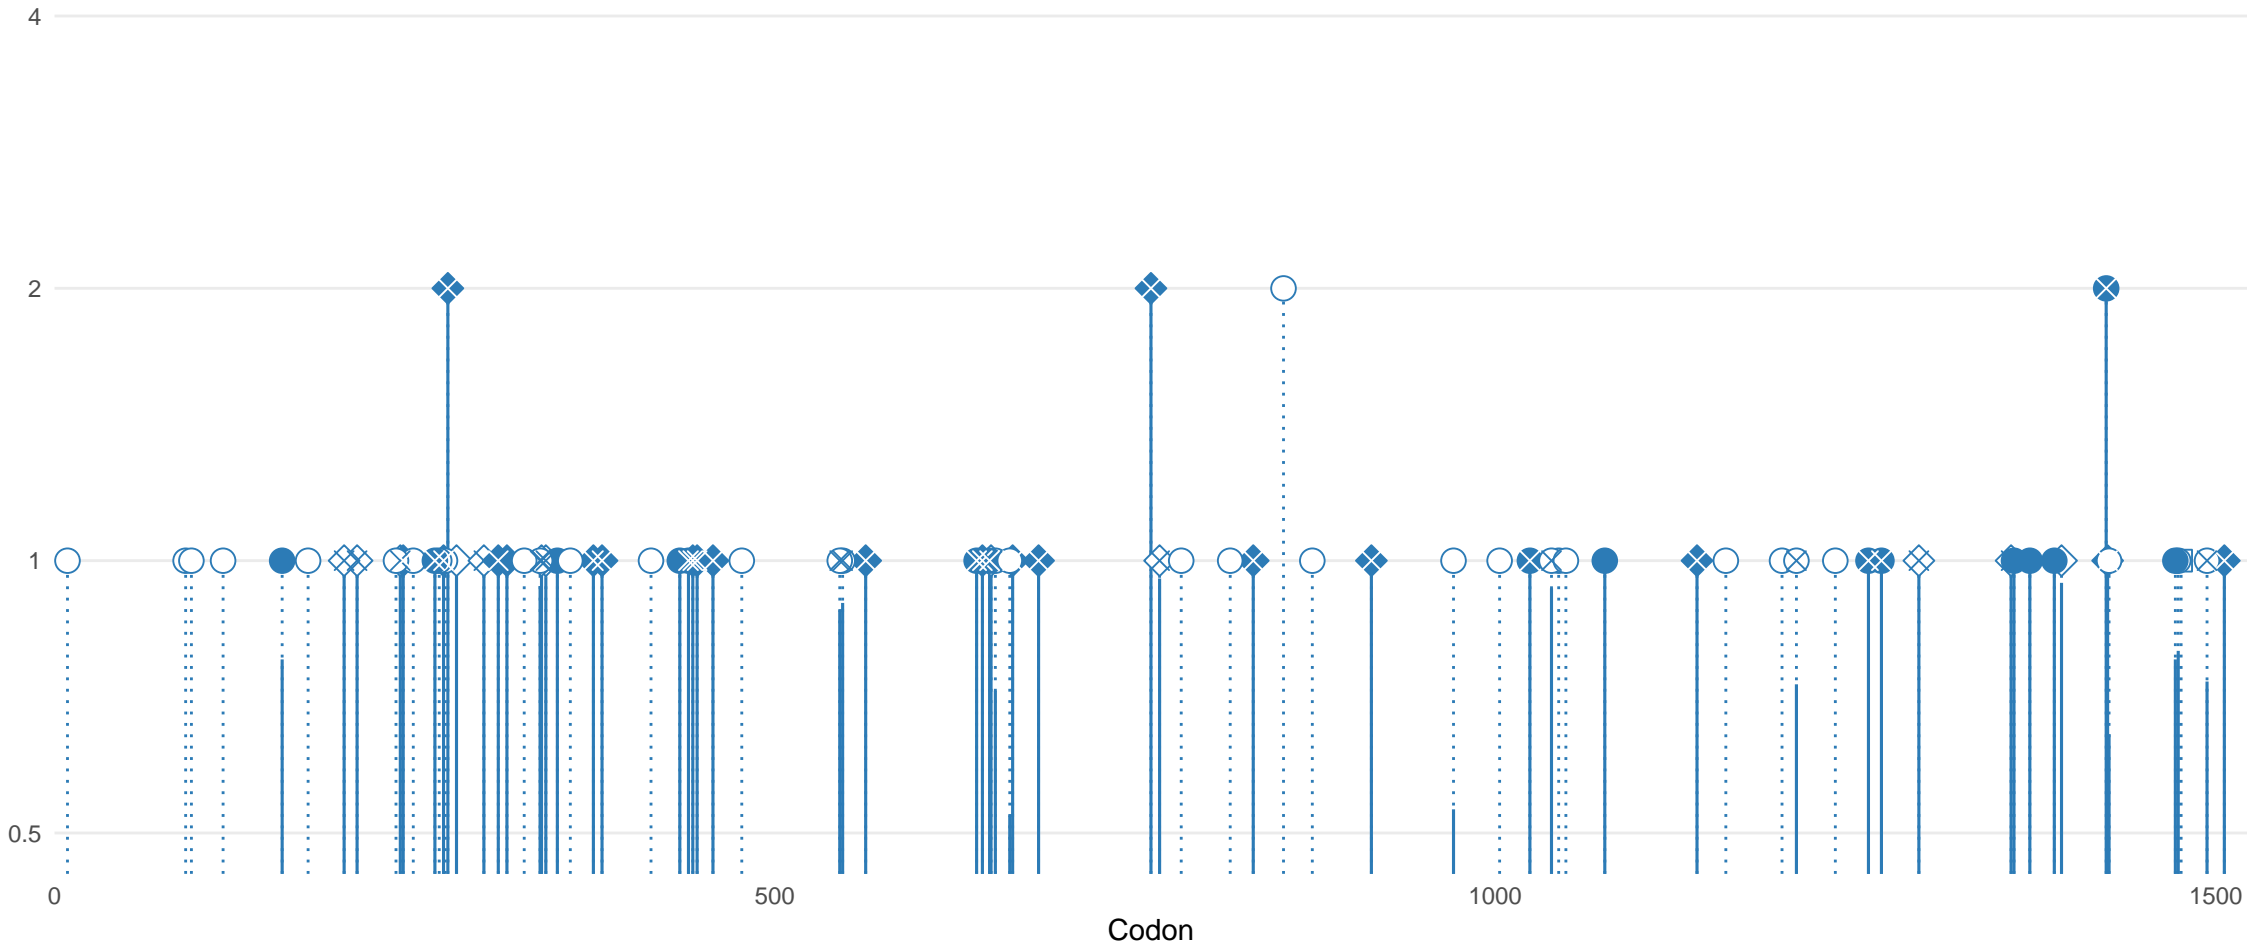

**Monoallelic:** ○ SNV □ MNV ◇ INDEL in frame ⊗ SNV nonsense ⊗ MNV nonsense ⊗ INDEL out of frame  
**Biallelic/Multihit:** ● SNV ■ MNV ◆ INDEL in frame ⊗ SNV nonsense ⊗ MNV nonsense ◆ INDEL out of frame  
**Hotspot:** ●

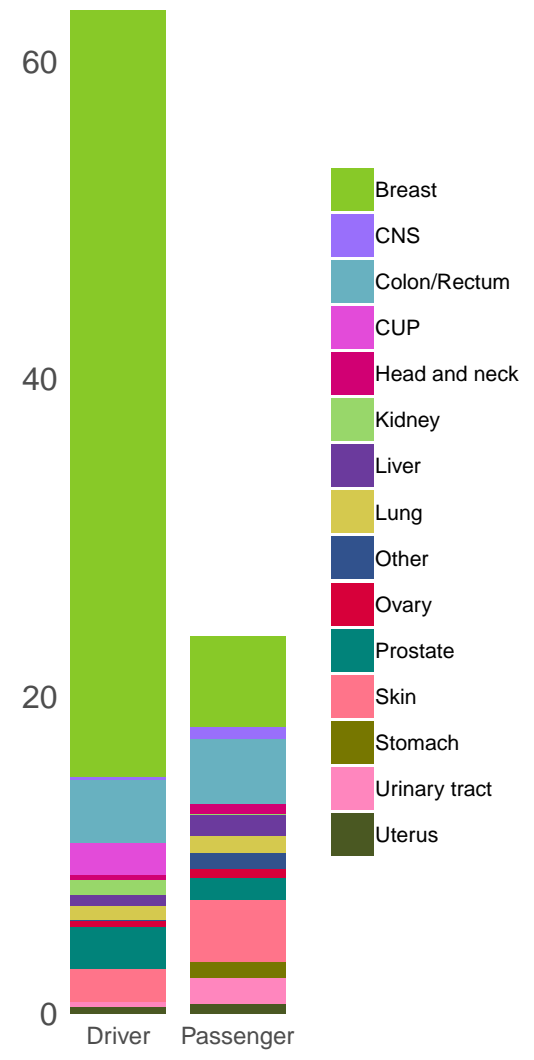

Driver Passenger

# MAX Variants

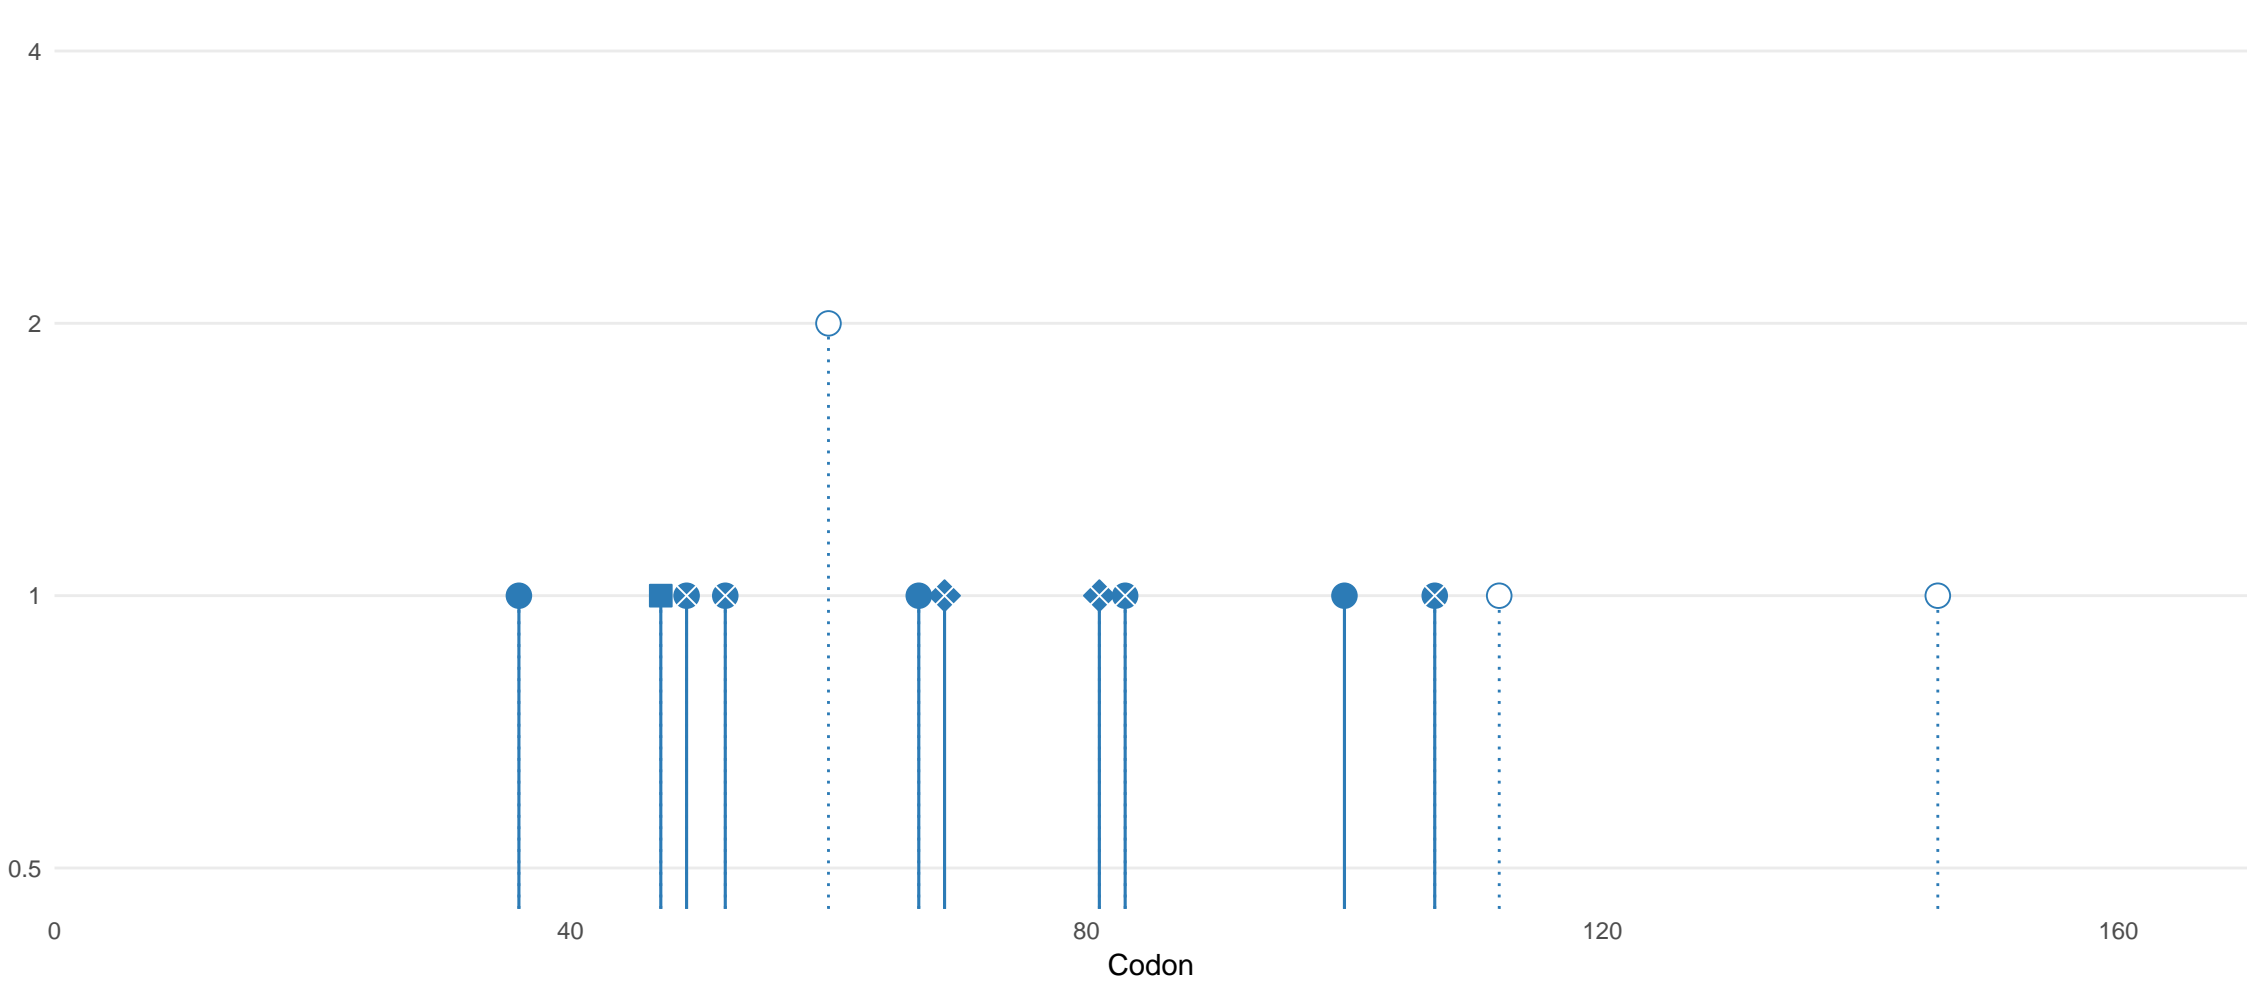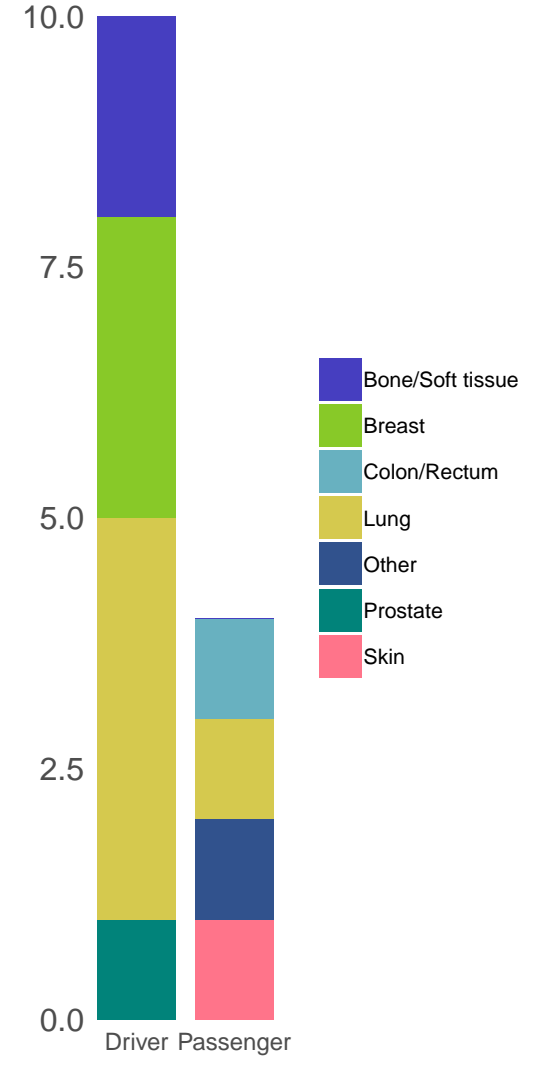

Monoallelic: ○ SNV □ MNV ◇ INDEL in frame ⊗ SNV nonsense ⊗ MNV nonsense ⊗ INDEL out of frame  
 Biallelic/Multihit: ● SNV ■ MNV ◆ INDEL in frame ⊗ SNV nonsense ⊗ MNV nonsense ◆ INDEL out of frame  
 Hotspot: ●

# MED12 Variants

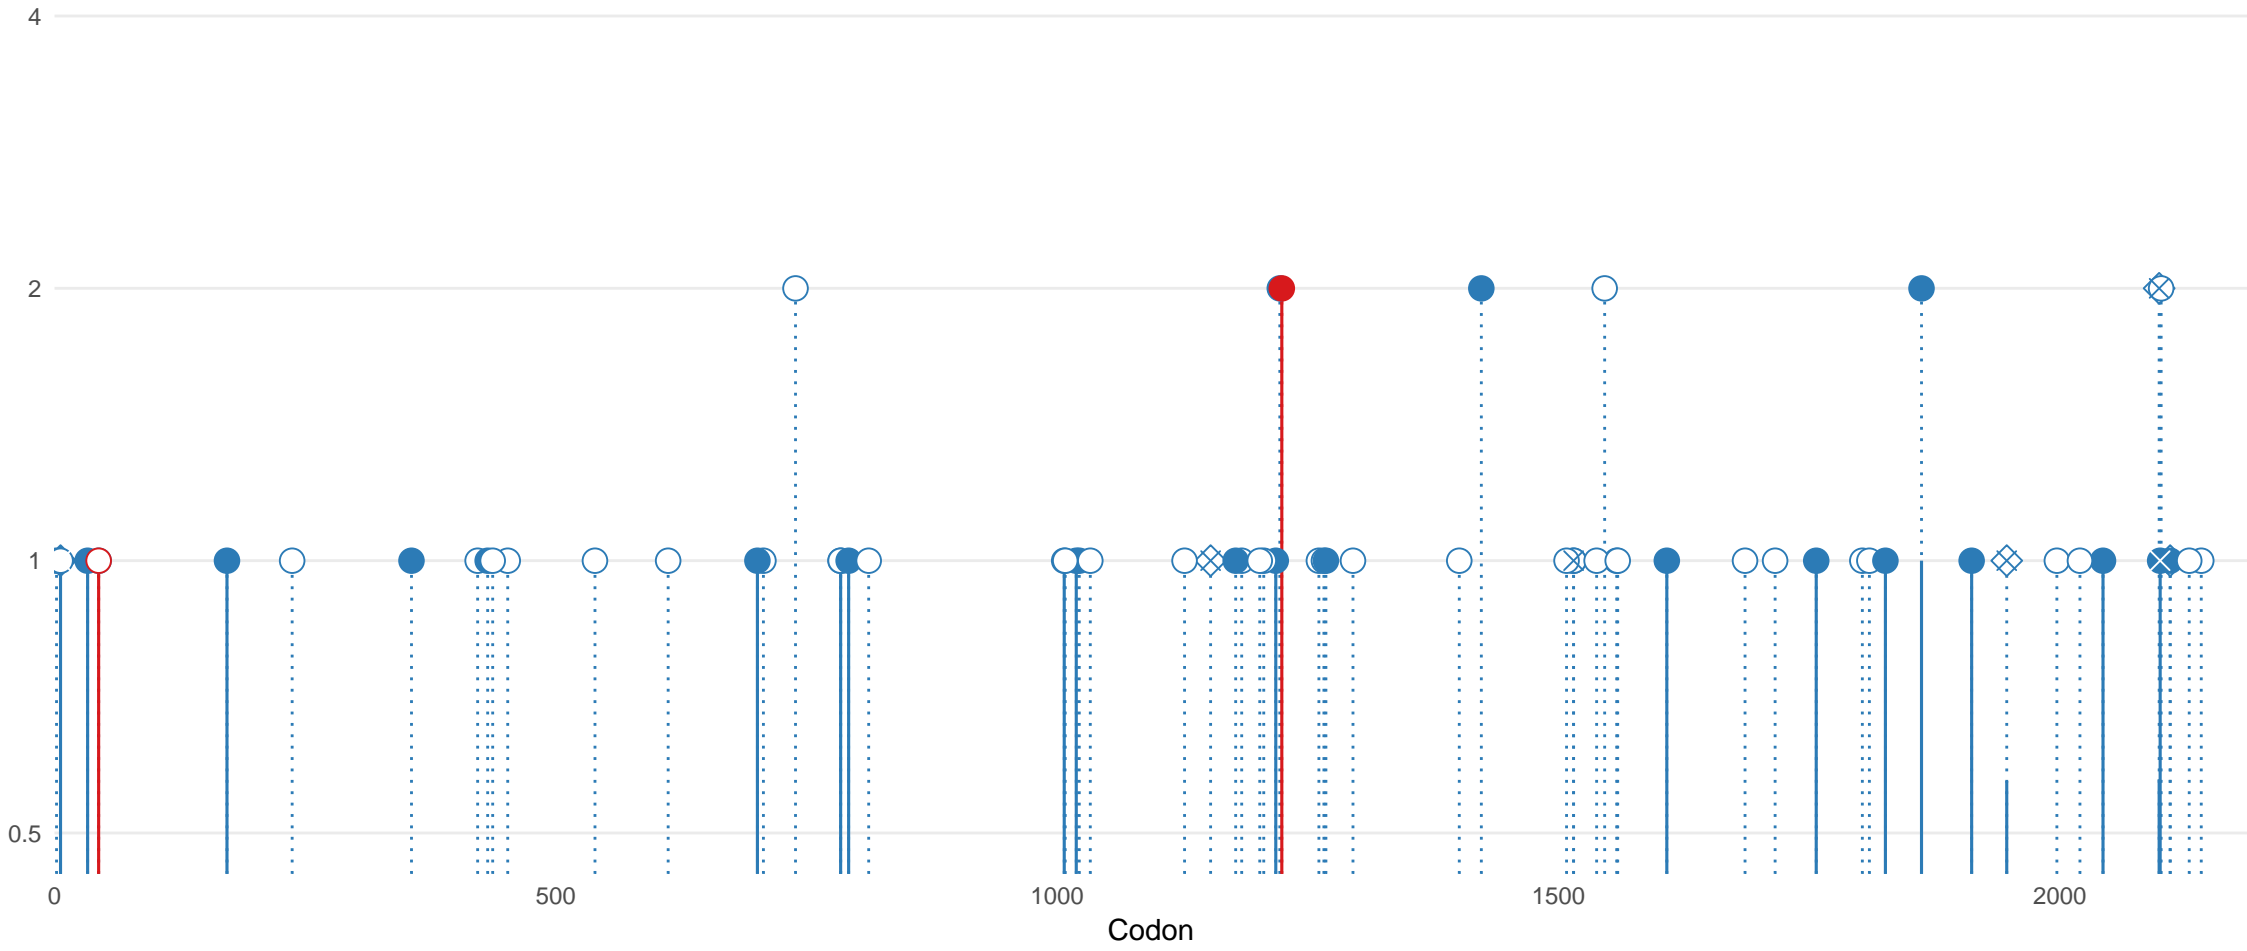

**Monoallelic:** ○ SNV □ MNV ◇ INDEL in frame ⊗ SNV nonsense ⊗ MNV nonsense ⊗ INDEL out of frame  
**Biallelic/Multihit:** ● SNV ■ MNV ◆ INDEL in frame ⊗ SNV nonsense ⊗ MNV nonsense ⊗ INDEL out of frame  
**Hotspot:** ●

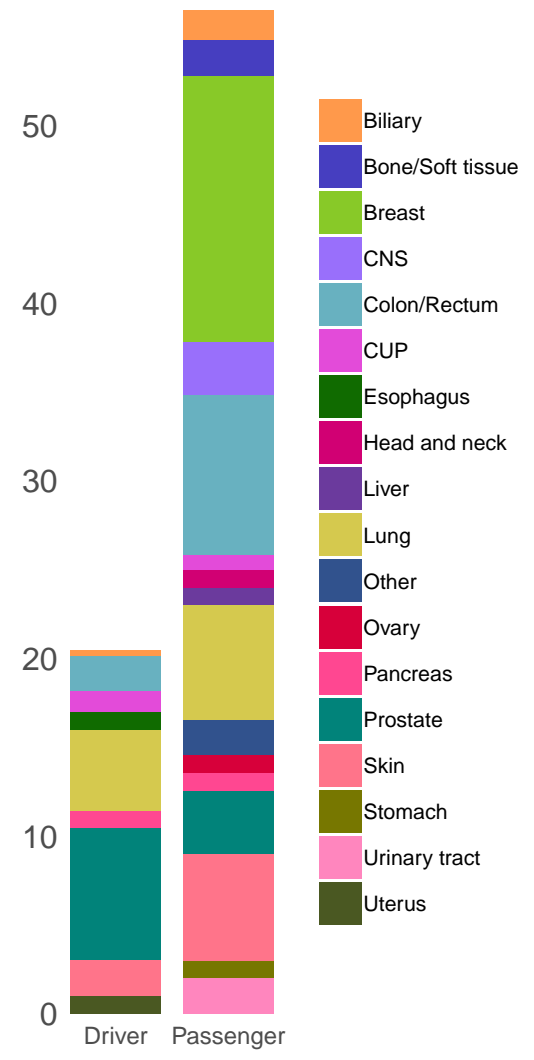

# MEN1 Variants

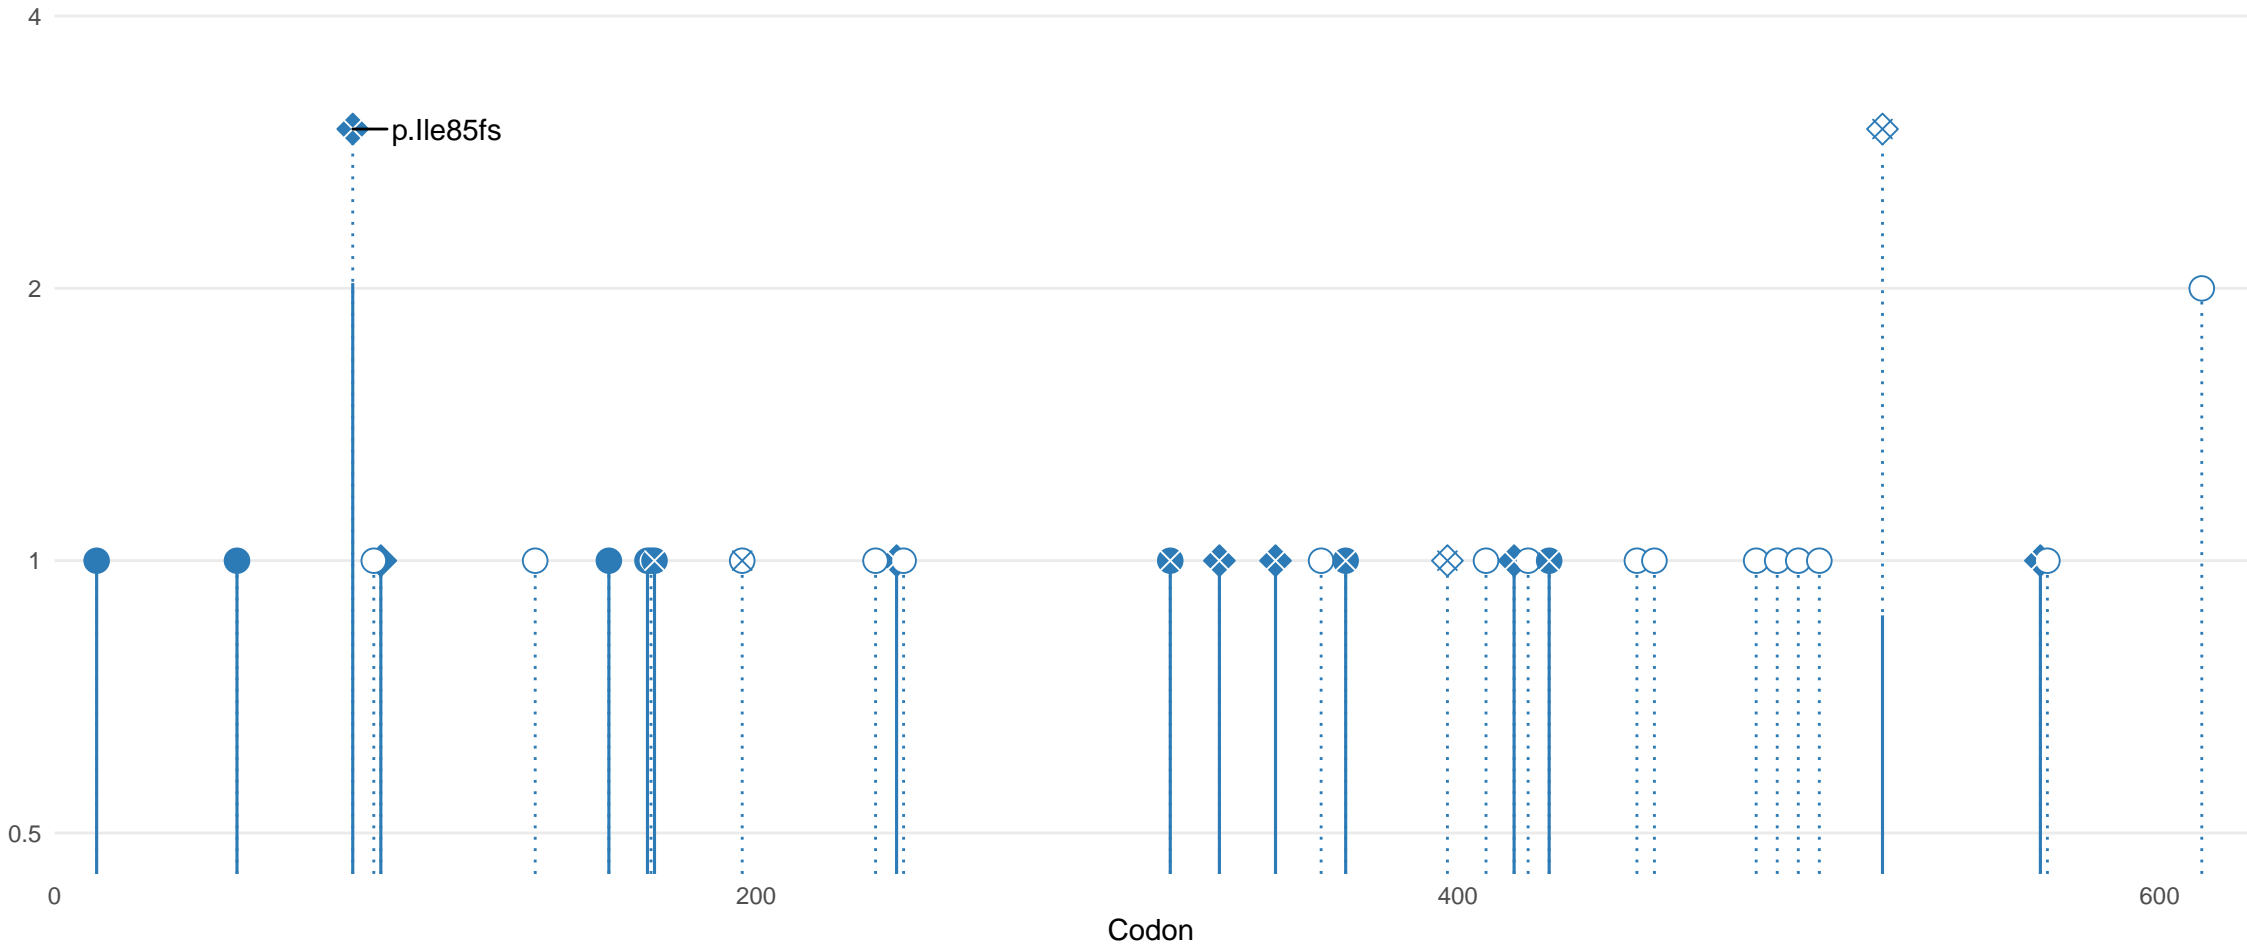

Monoallelic: ○ SNV □ MNV ◇ INDEL in frame ⊗ SNV nonsense ⊠ MNV nonsense ⬠ INDEL out of frame  
 Biallelic/Multihit: ● SNV ■ MNV ◆ INDEL in frame ⊗ SNV nonsense ⊠ MNV nonsense ⬠ INDEL out of frame Hotspot: ●

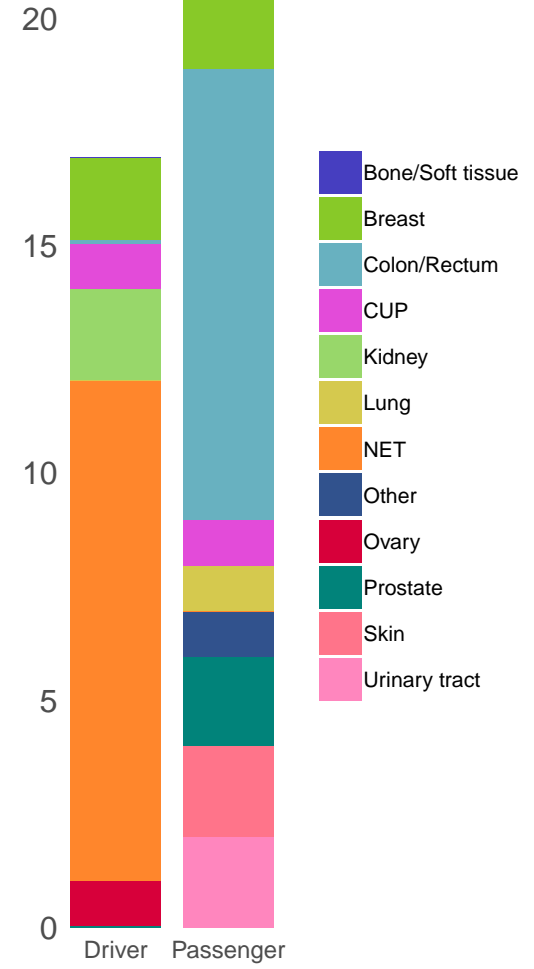

# MGA Variants

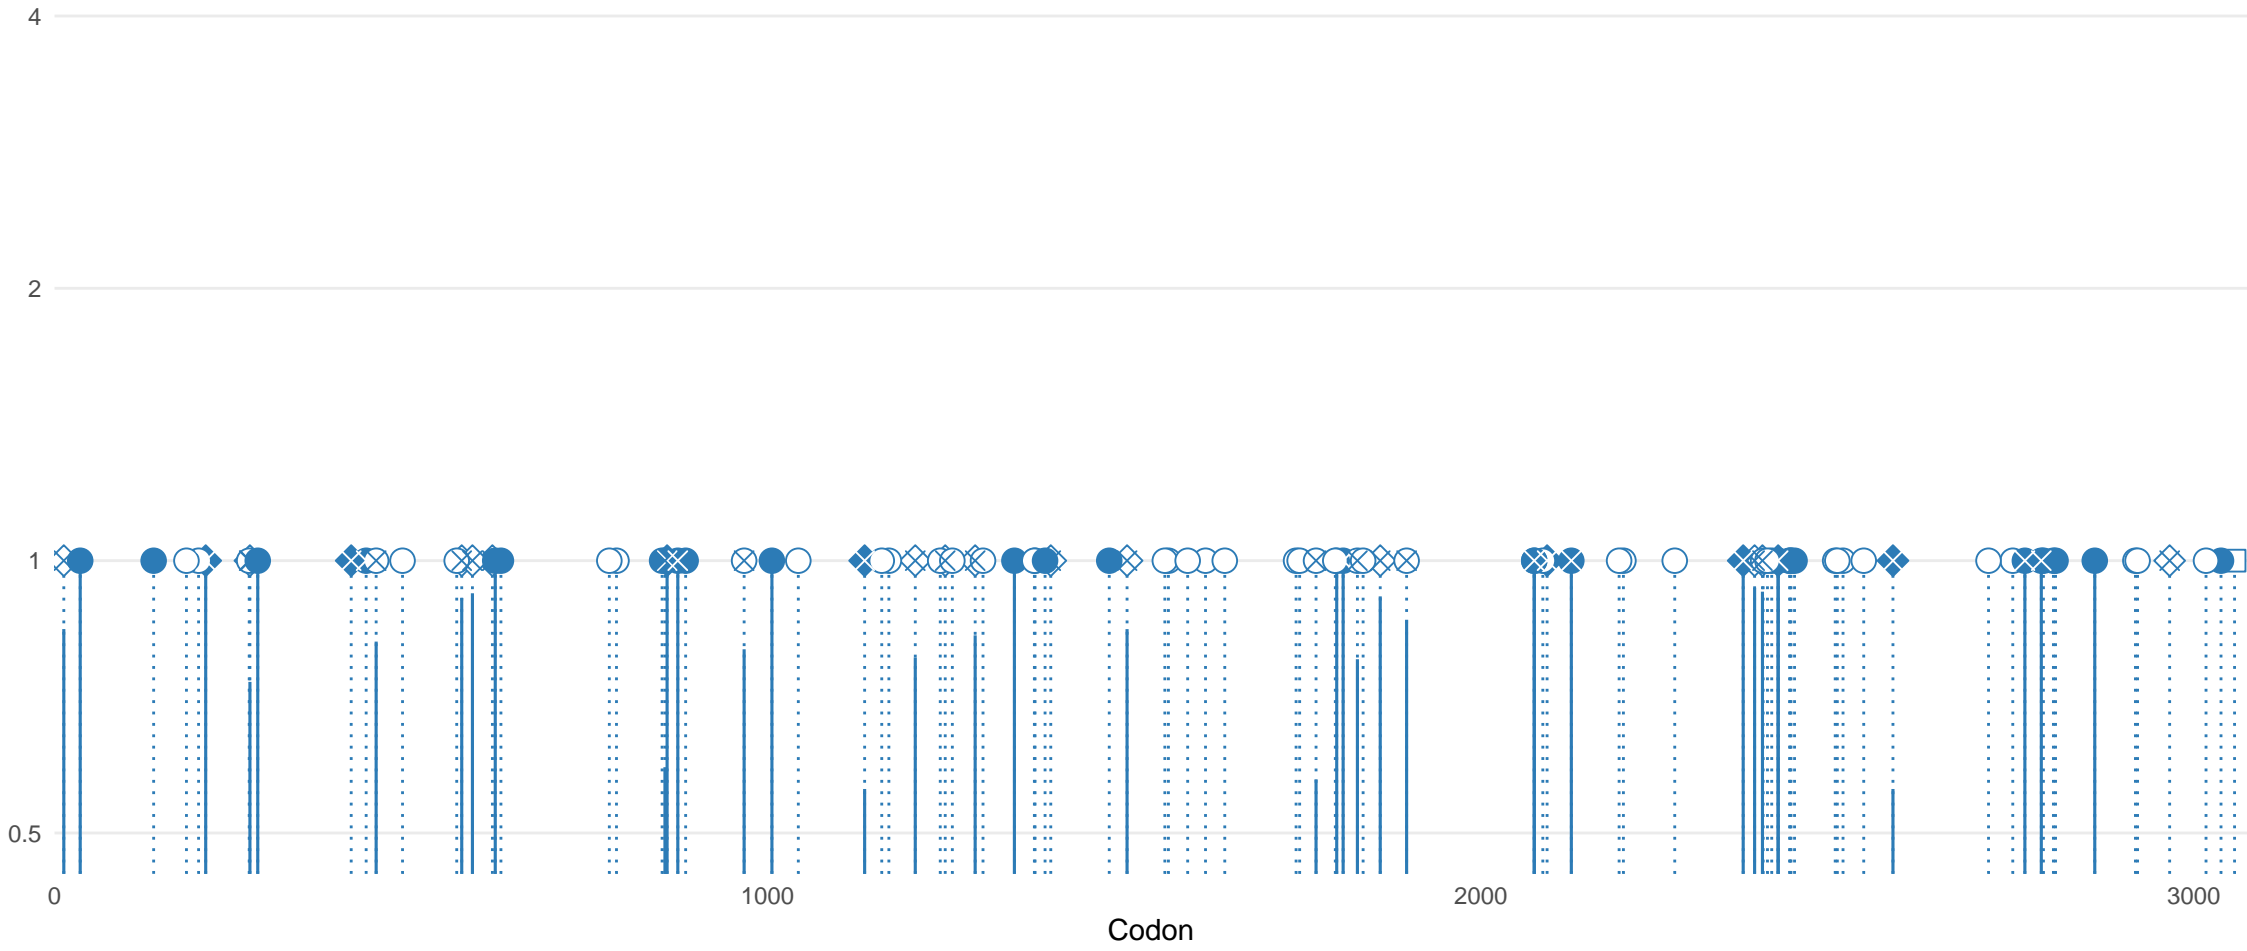

**Monoallelic:** ○ SNV □ MNV ◇ INDEL in frame ⊗ SNV nonsense ⊗ MNV nonsense ⊗ INDEL out of frame  
**Biallelic/Multihit:** ● SNV ■ MNV ◆ INDEL in frame ⊗ SNV nonsense ⊗ MNV nonsense ◆ INDEL out of frame  
**Hotspot:** ●

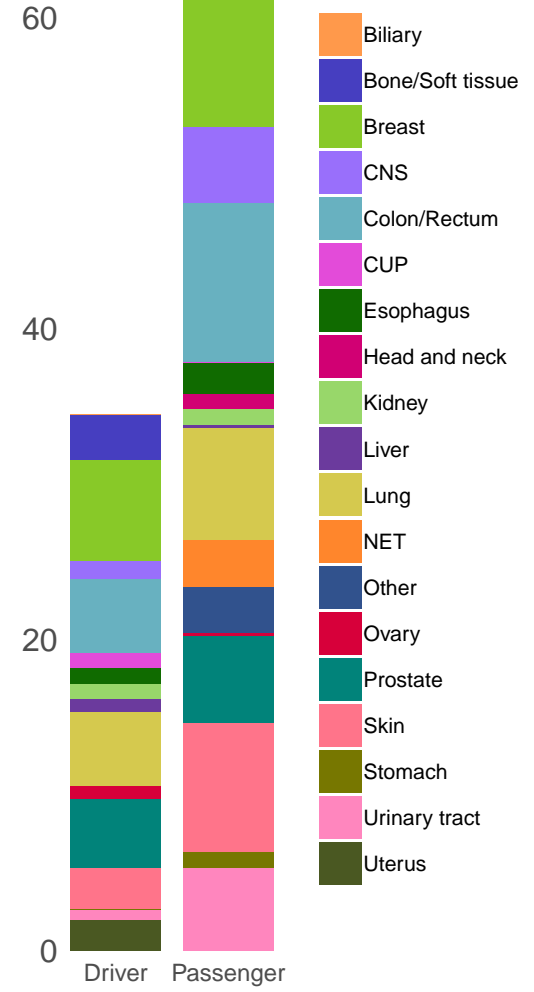



# MLH1 Variants

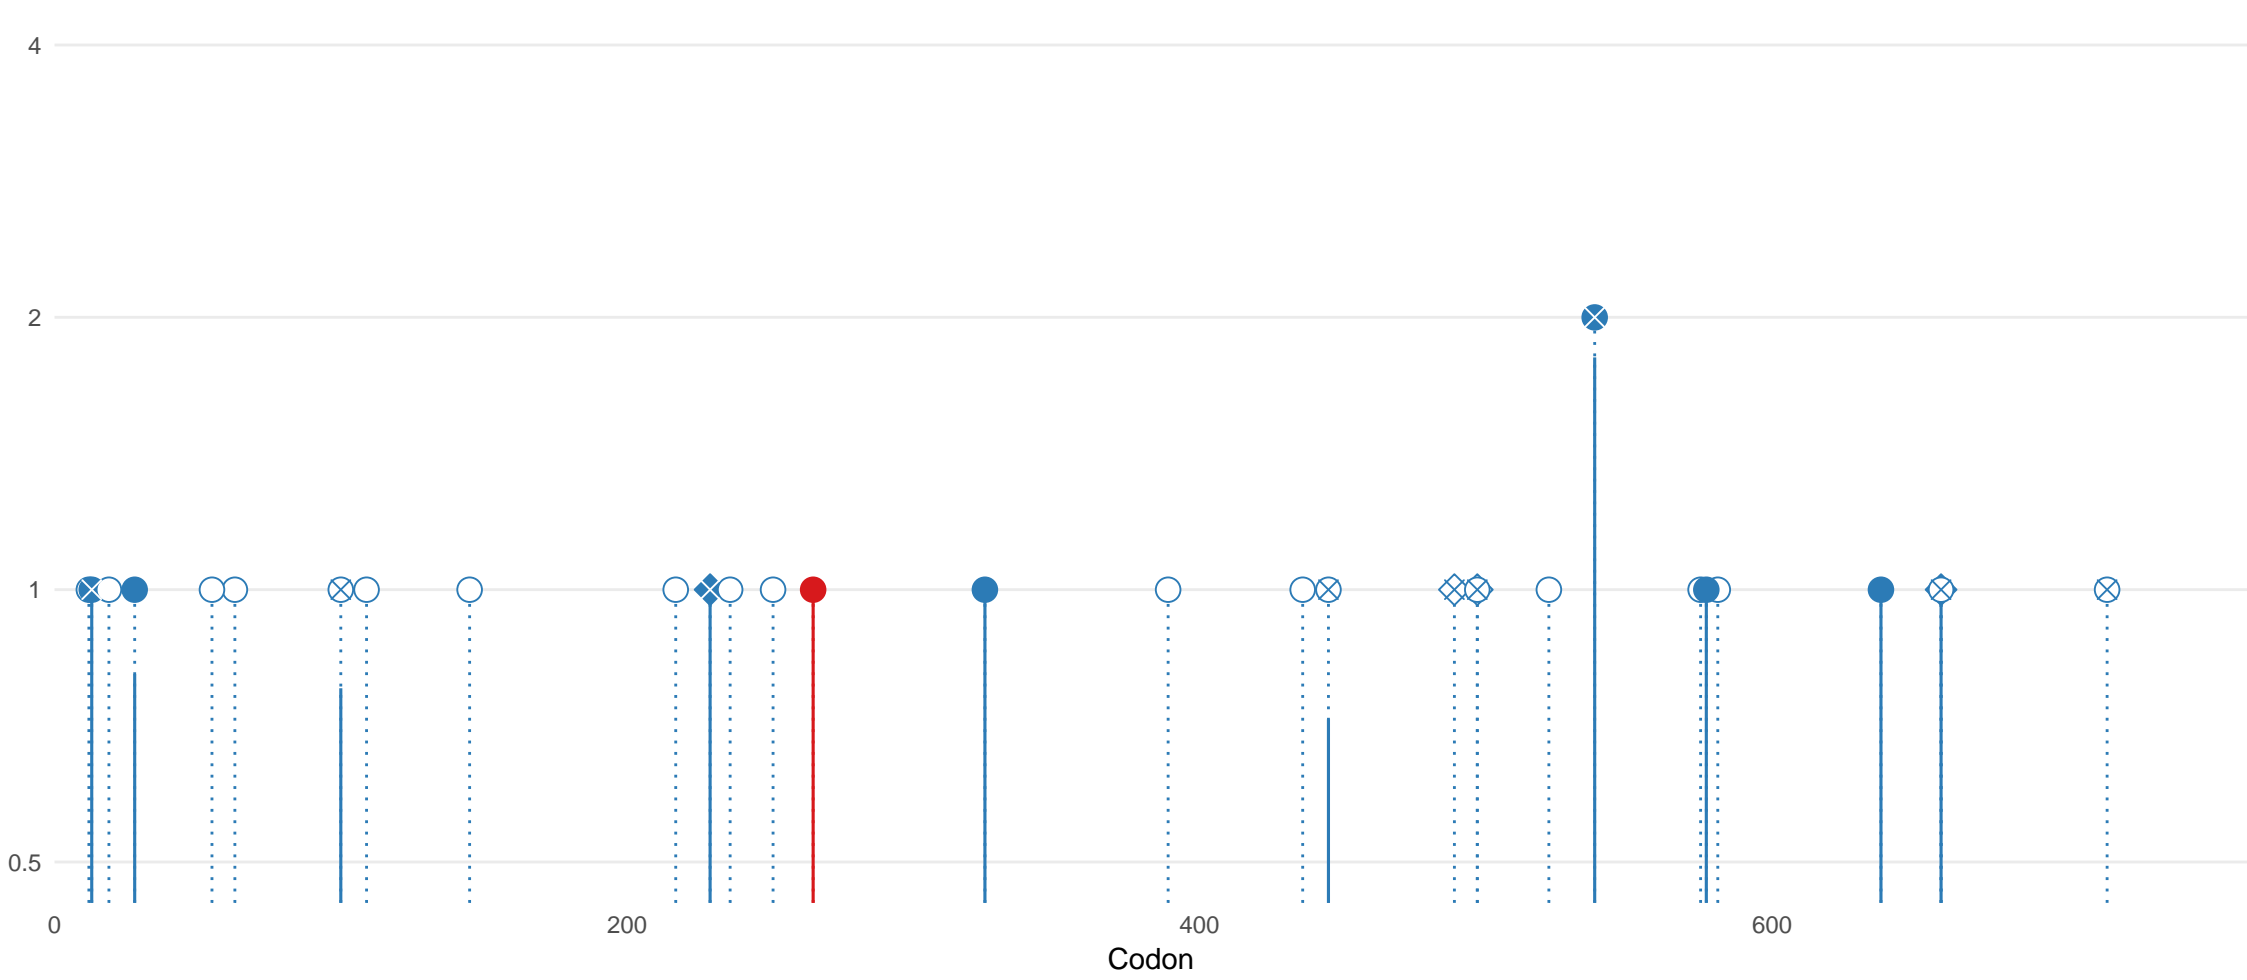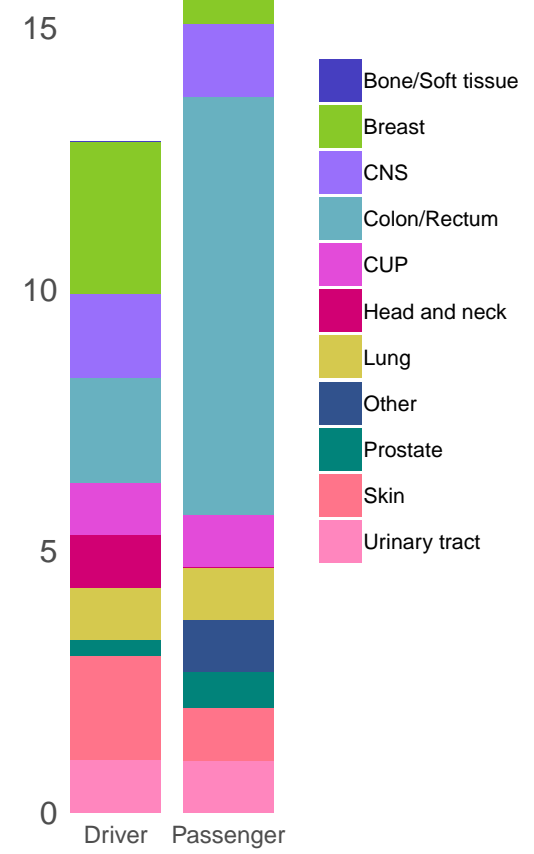

Monoallelic: ○ SNV □ MNV ◇ INDEL in frame ⊗ SNV nonsense ⊗ MNV nonsense ⊗ INDEL out of frame  
 Biallelic/Multihit: ● SNV ■ MNV ◆ INDEL in frame ⊗ SNV nonsense ⊗ MNV nonsense ◆ INDEL out of frame  
 Hotspot: ●

# MLK4 Variants

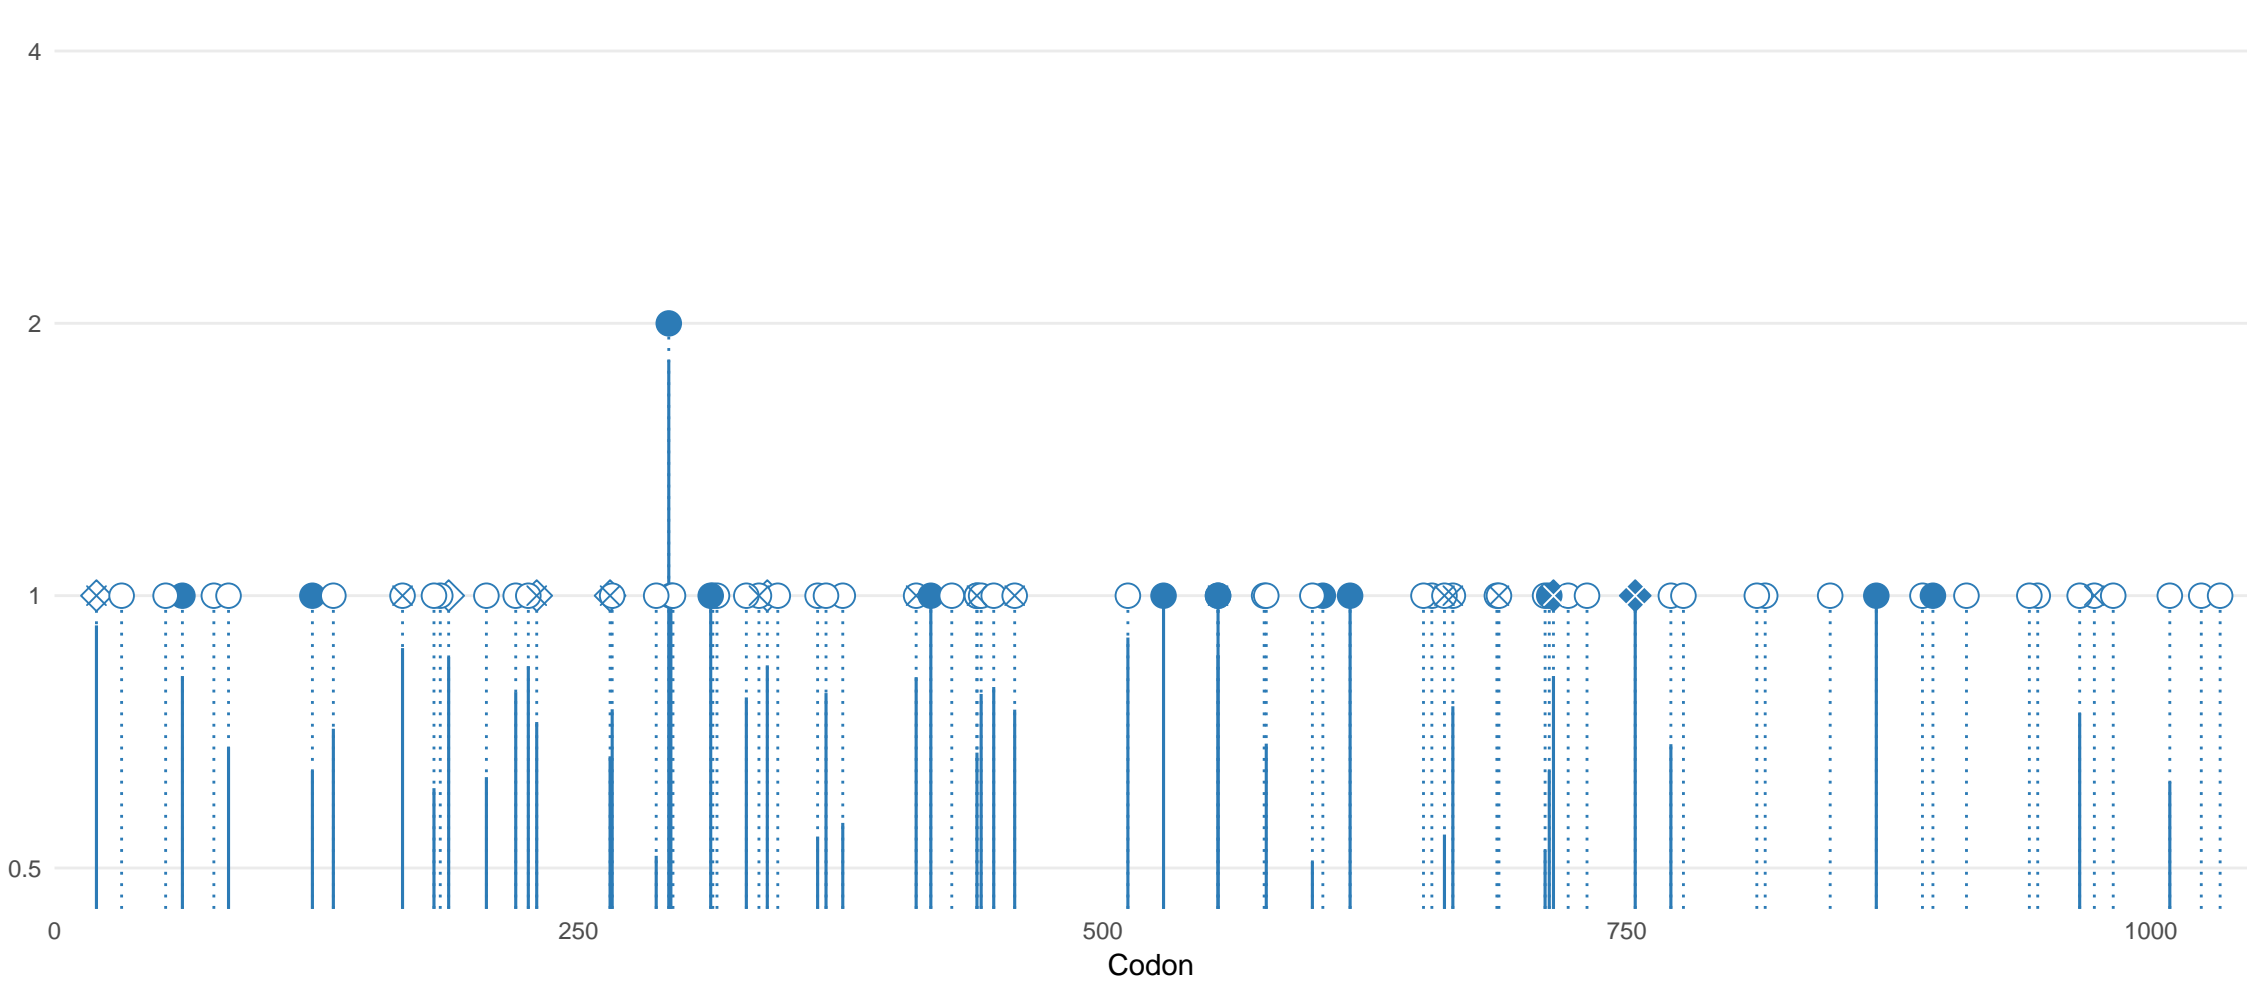

**Monoallelic:** ○ SNV □ MNV ◇ INDEL in frame ⊗ SNV nonsense ⊗ MNV nonsense ⊗ INDEL out of frame  
**Biallelic/Multihit:** ● SNV ■ MNV ◆ INDEL in frame ⊗ SNV nonsense ⊗ MNV nonsense ◆ INDEL out of frame  
**Hotspot:** ●

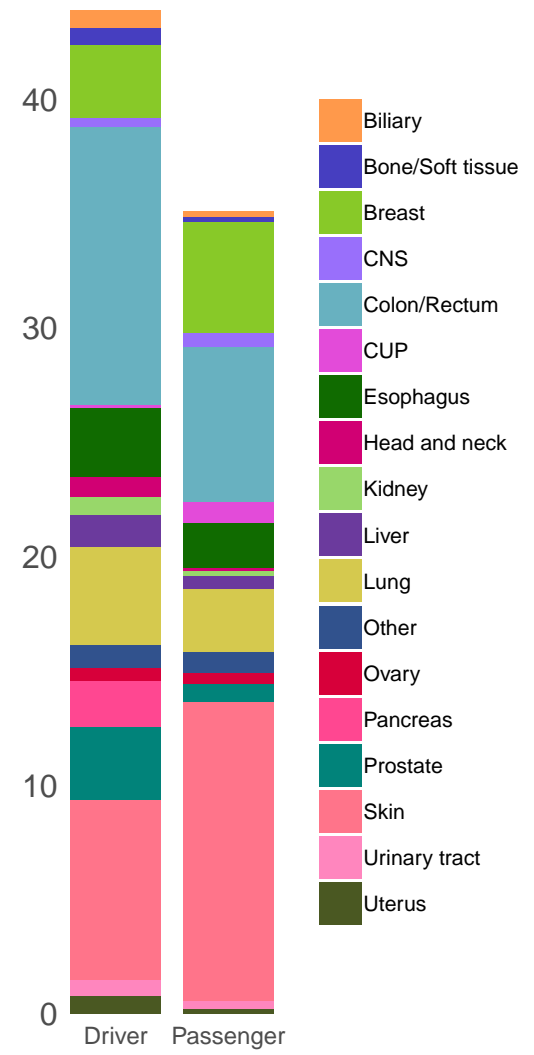

Driver Passenger

# MSH2 Variants

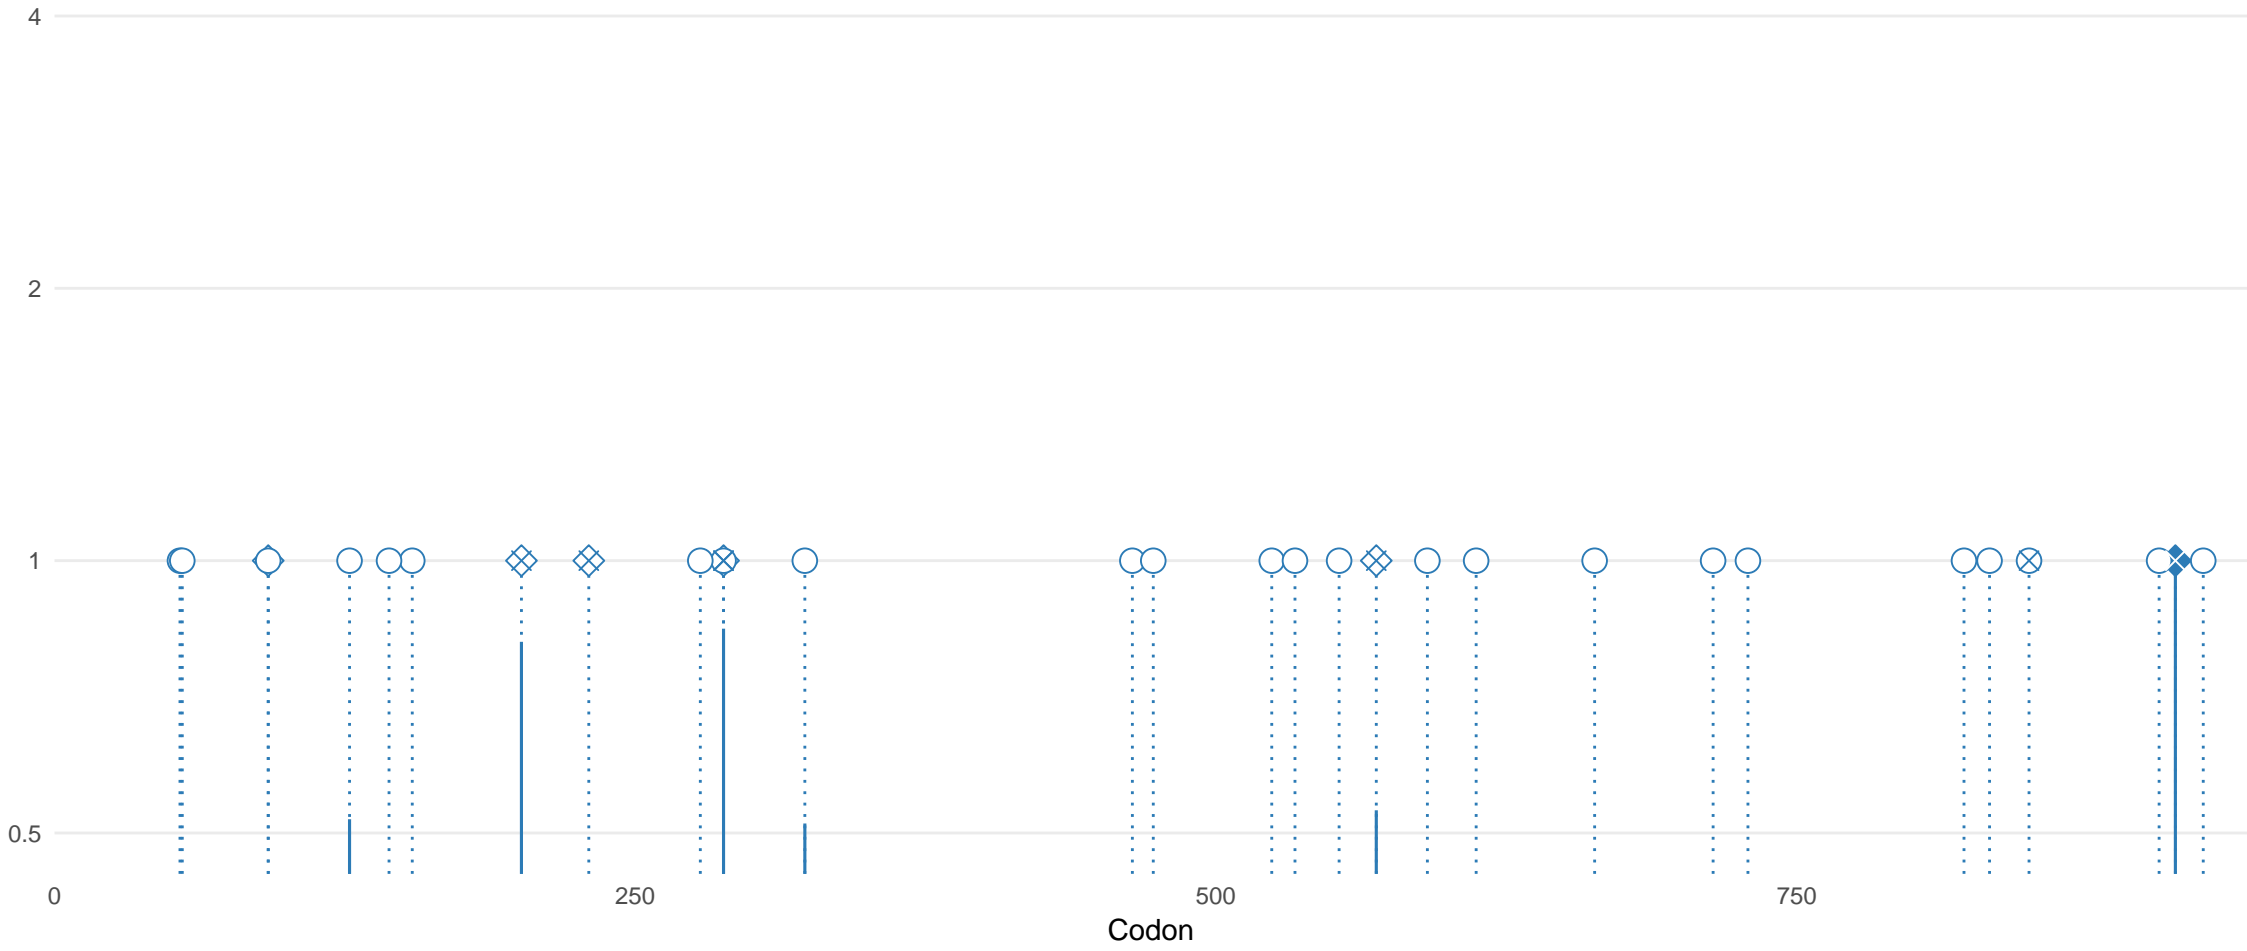

**Monoallelic:** ○ SNV □ MNV ◇ INDEL in frame ⊗ SNV nonsense ⊗ MNV nonsense ⊗ INDEL out of frame  
**Biallelic/Multihit:** ● SNV ■ MNV ◆ INDEL in frame ⊗ SNV nonsense ⊗ MNV nonsense ◆ INDEL out of frame  
**Hotspot:** ●

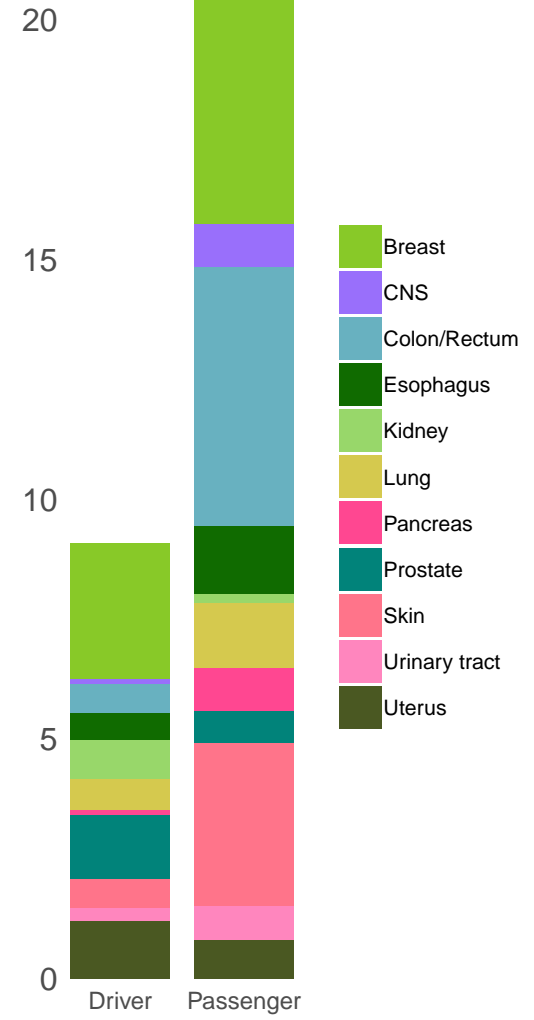

# MSH6 Variants

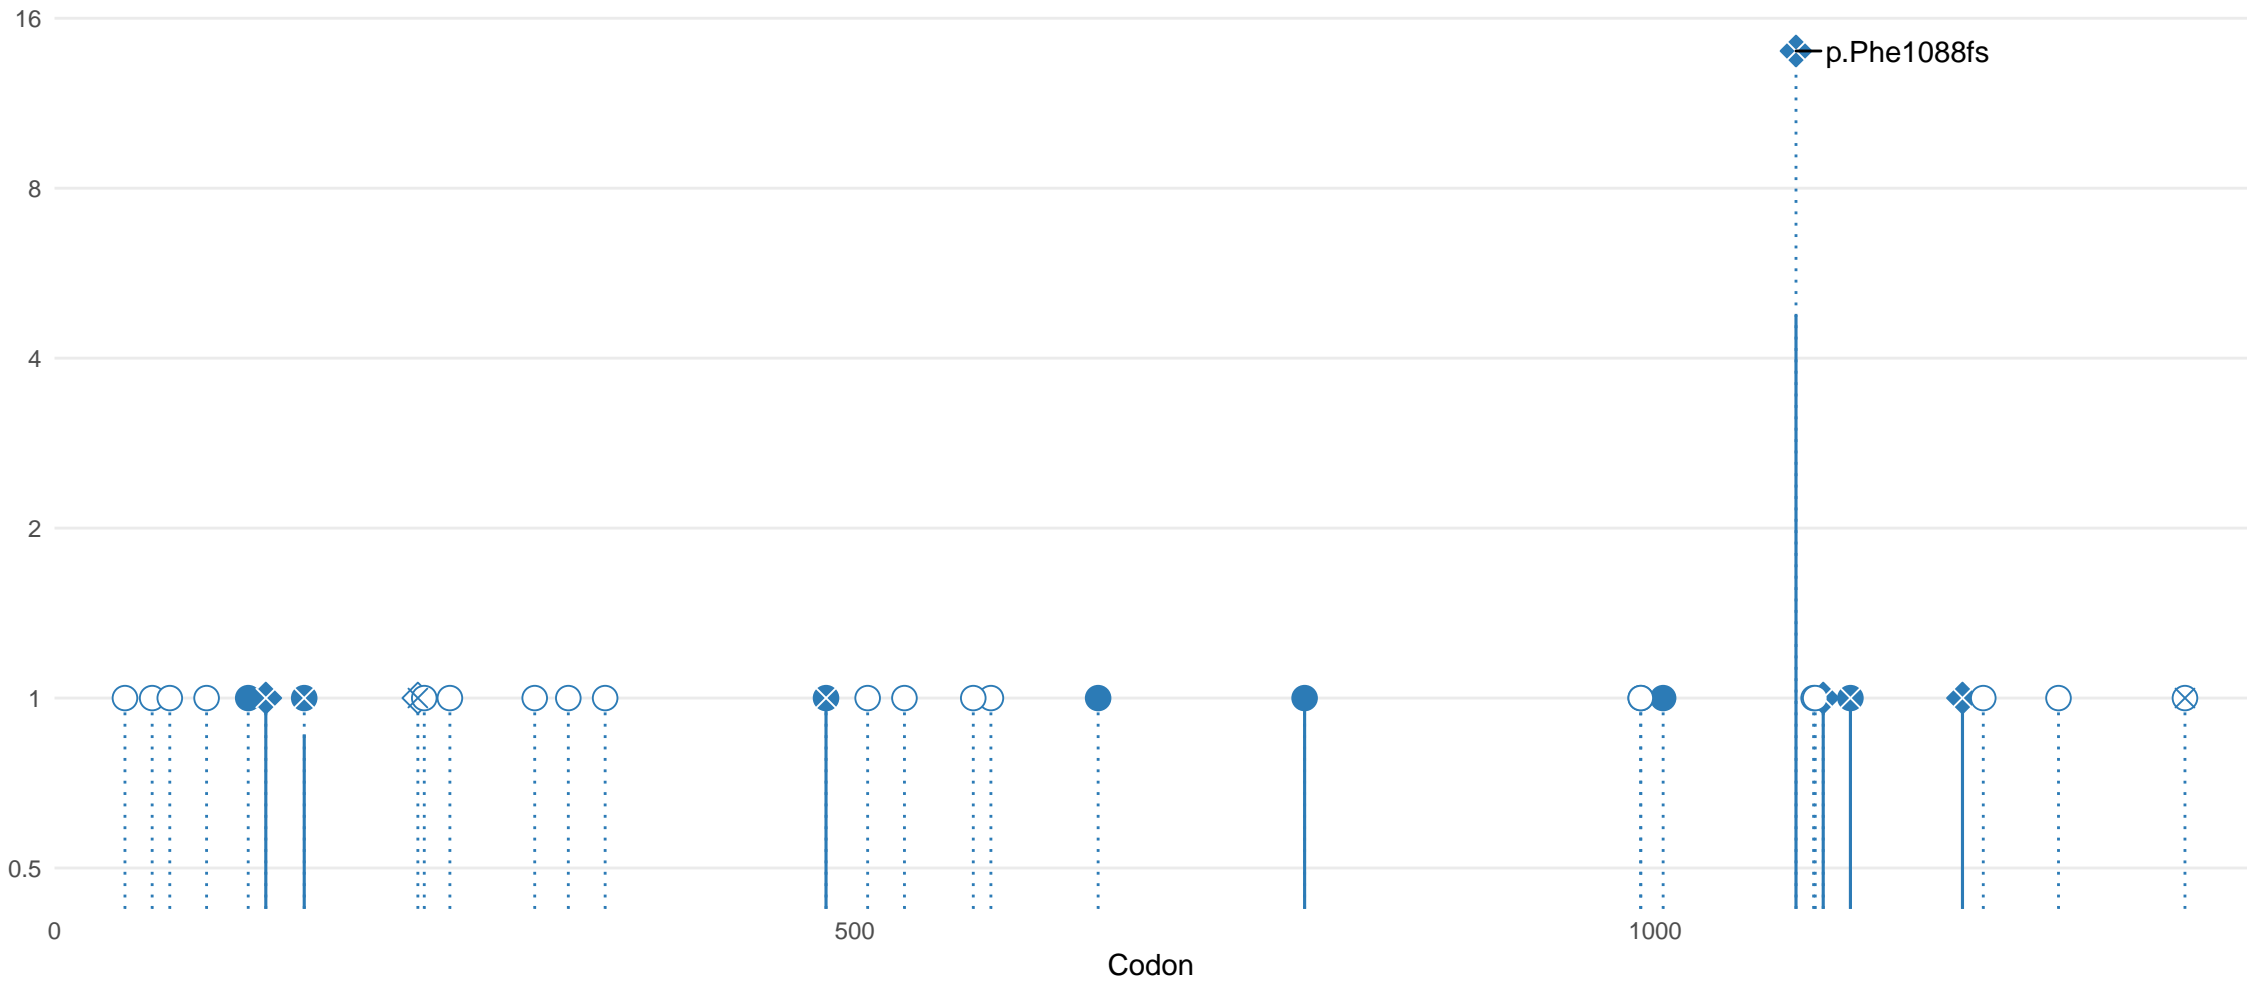

**Monoallelic:** ○ SNV □ MNV ◇ INDEL in frame ⊗ SNV nonsense ⊗ MNV nonsense ⊗ INDEL out of frame  
**Biallelic/Multihit:** ● SNV ■ MNV ◆ INDEL in frame ⊗ SNV nonsense ⊗ MNV nonsense ◆ INDEL out of frame  
**Hotspot:** ●

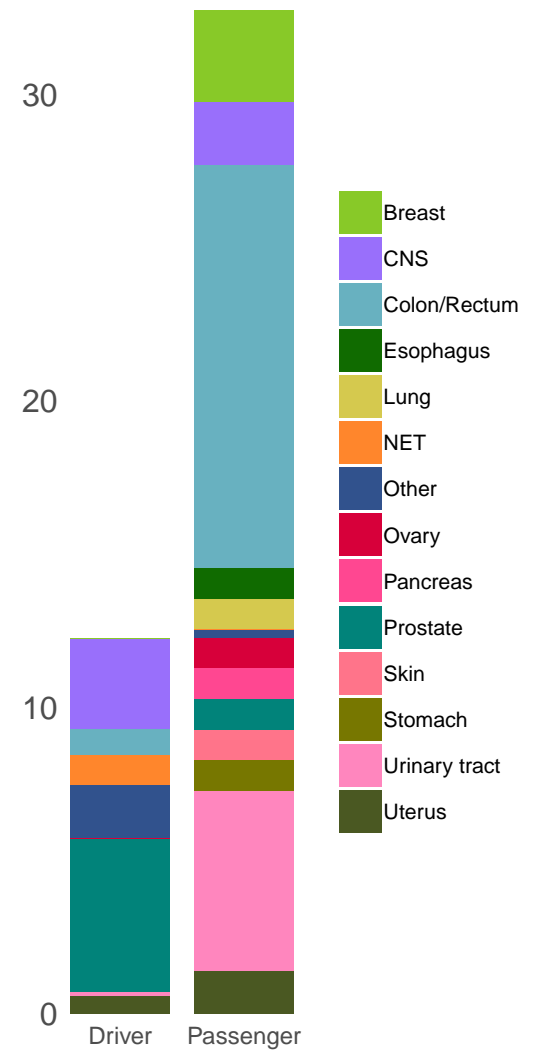

# NCOR1 Variants

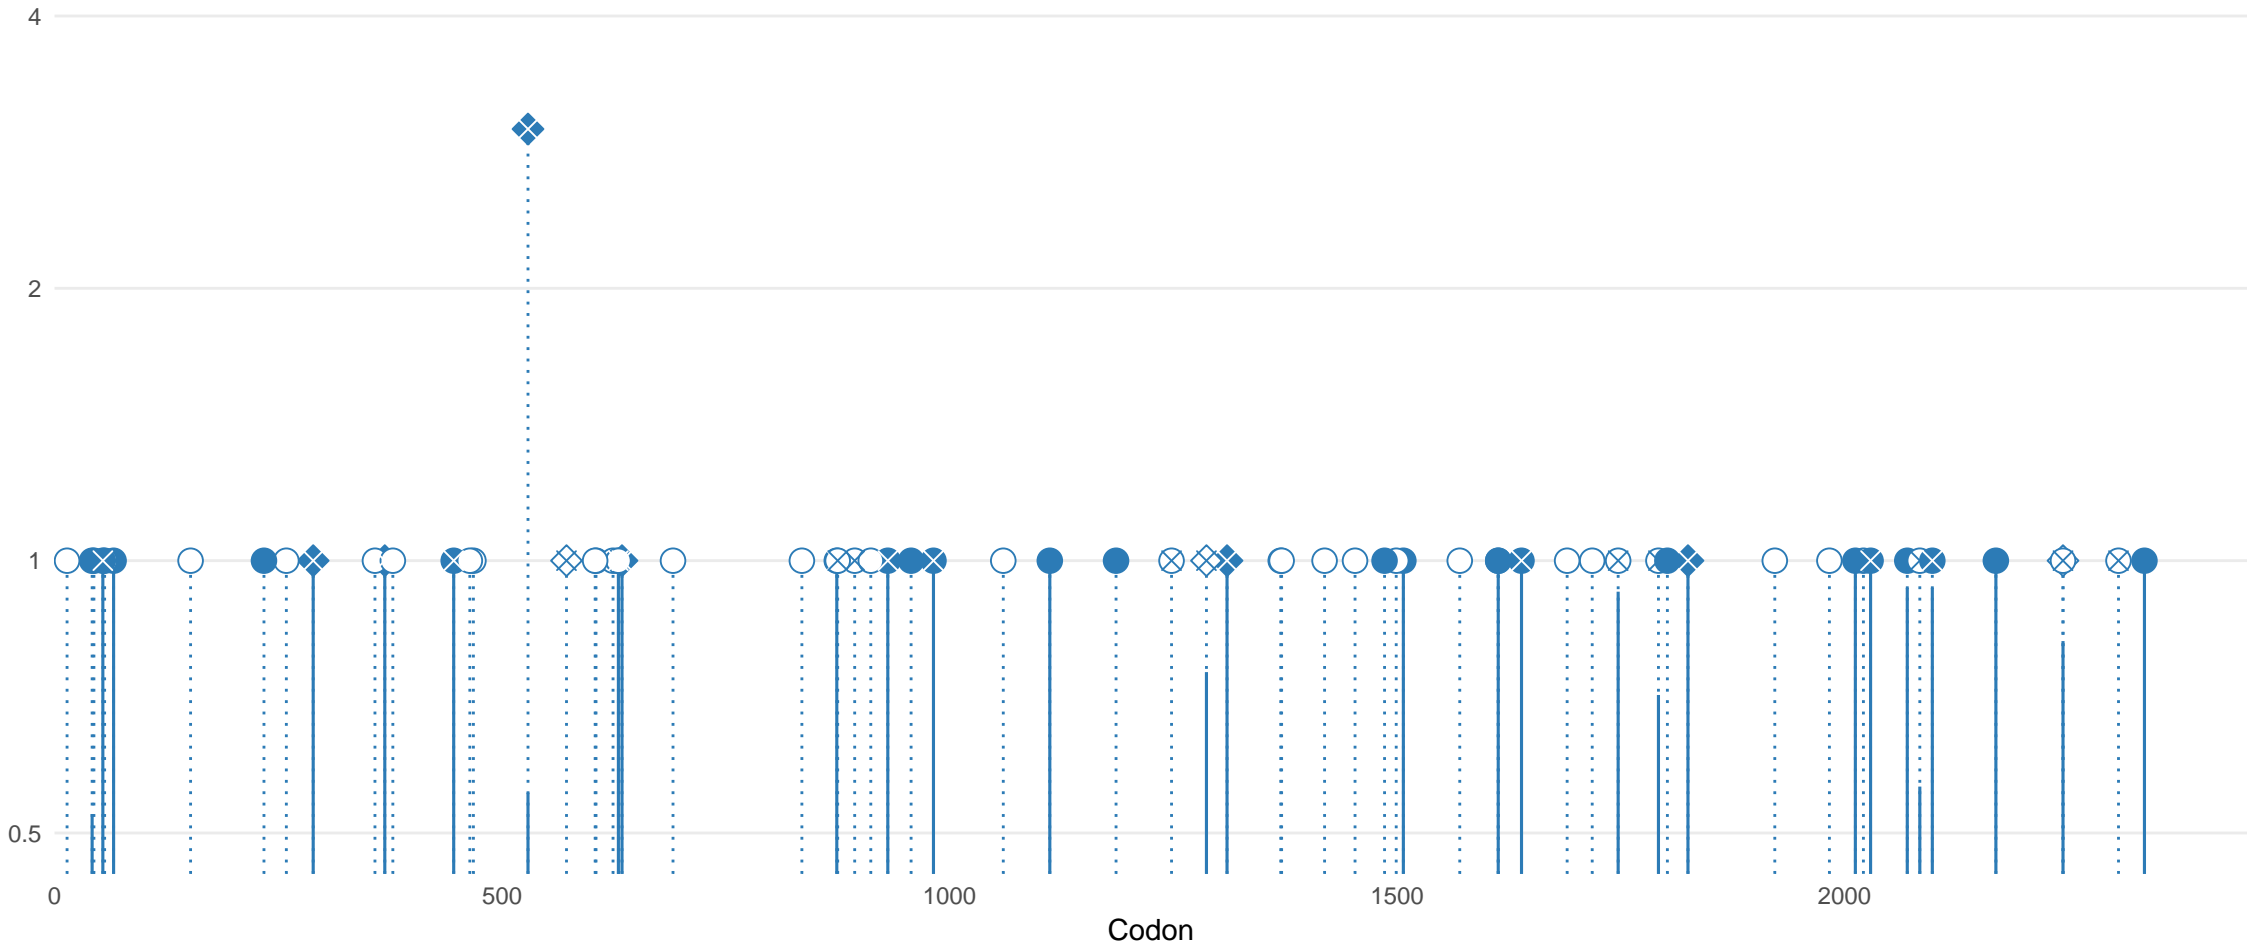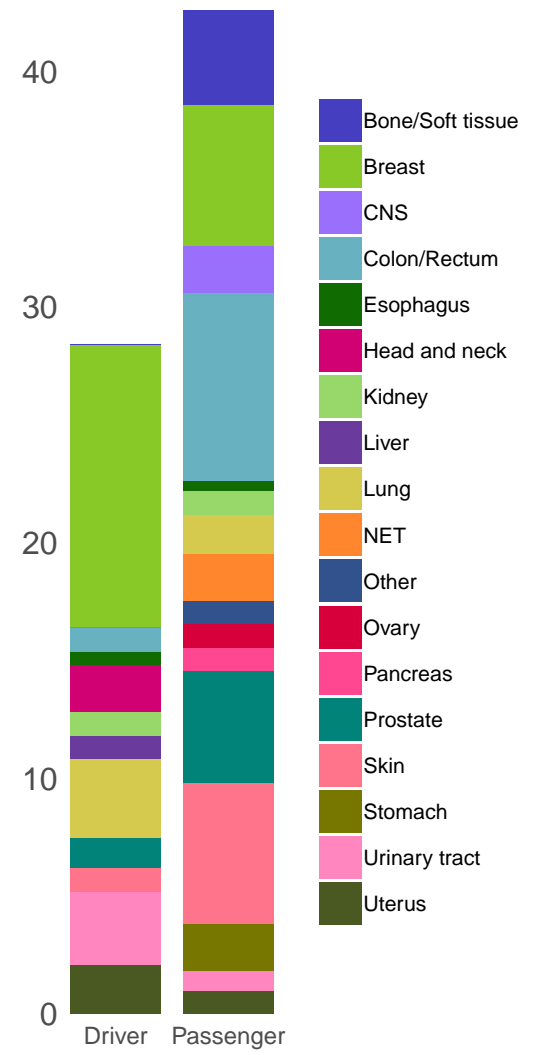

**Monoallelic:** ○ SNV □ MNV ◇ INDEL in frame ⊗ SNV nonsense ⊗ MNV nonsense ⊗ INDEL out of frame  
**Biallelic/Multihit:** ● SNV ■ MNV ◆ INDEL in frame ⊗ SNV nonsense ⊗ MNV nonsense ◆ INDEL out of frame  
**Hotspot:** ●

# NF1 Variants

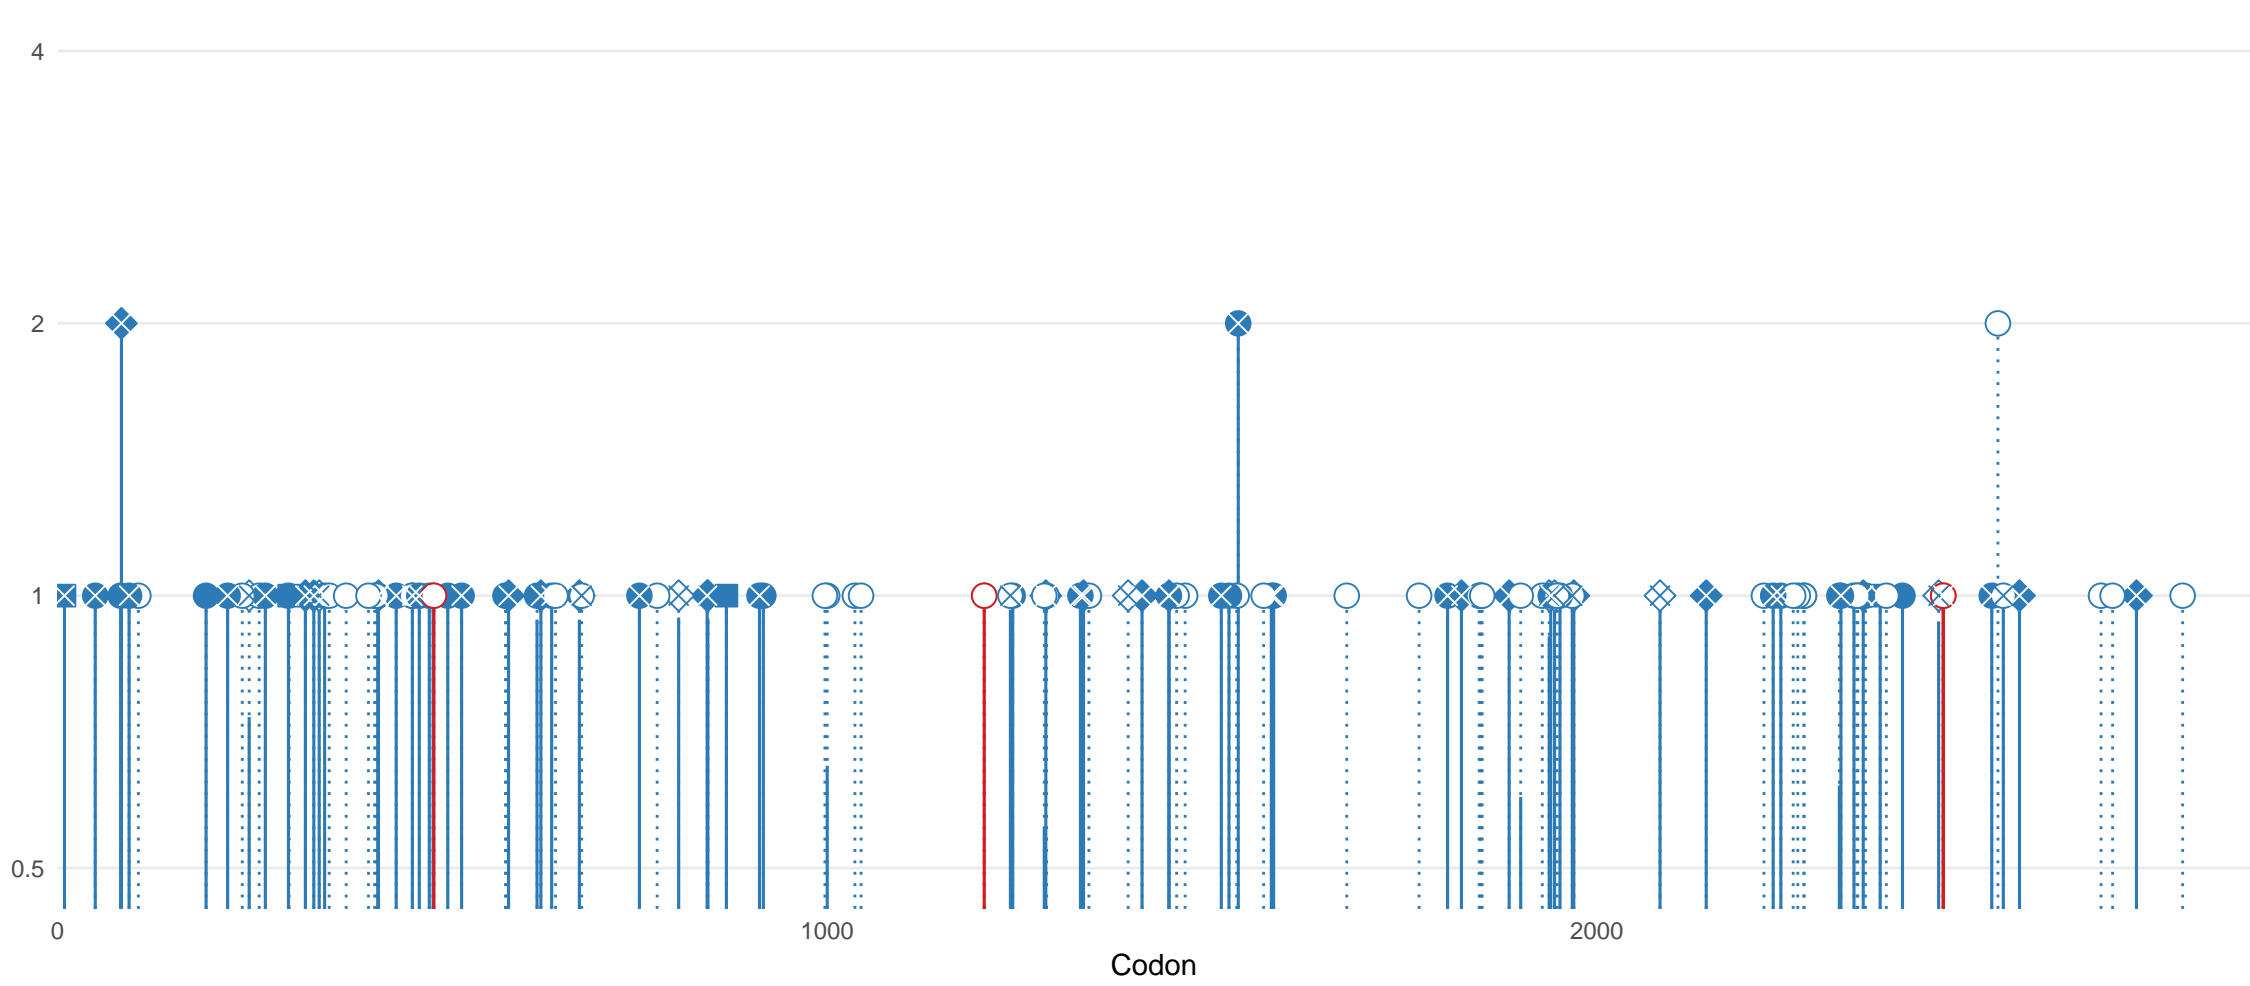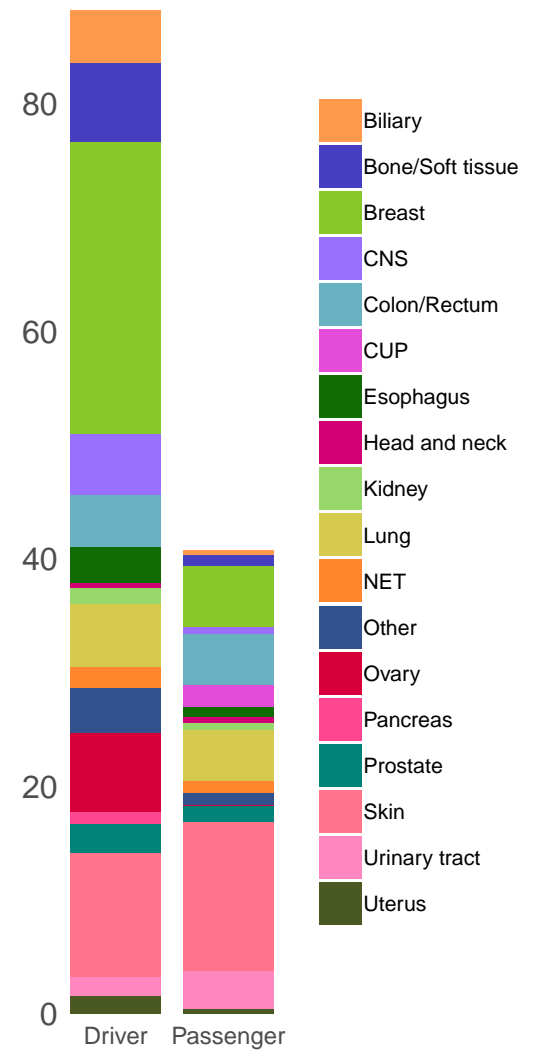

# NF2 Variants

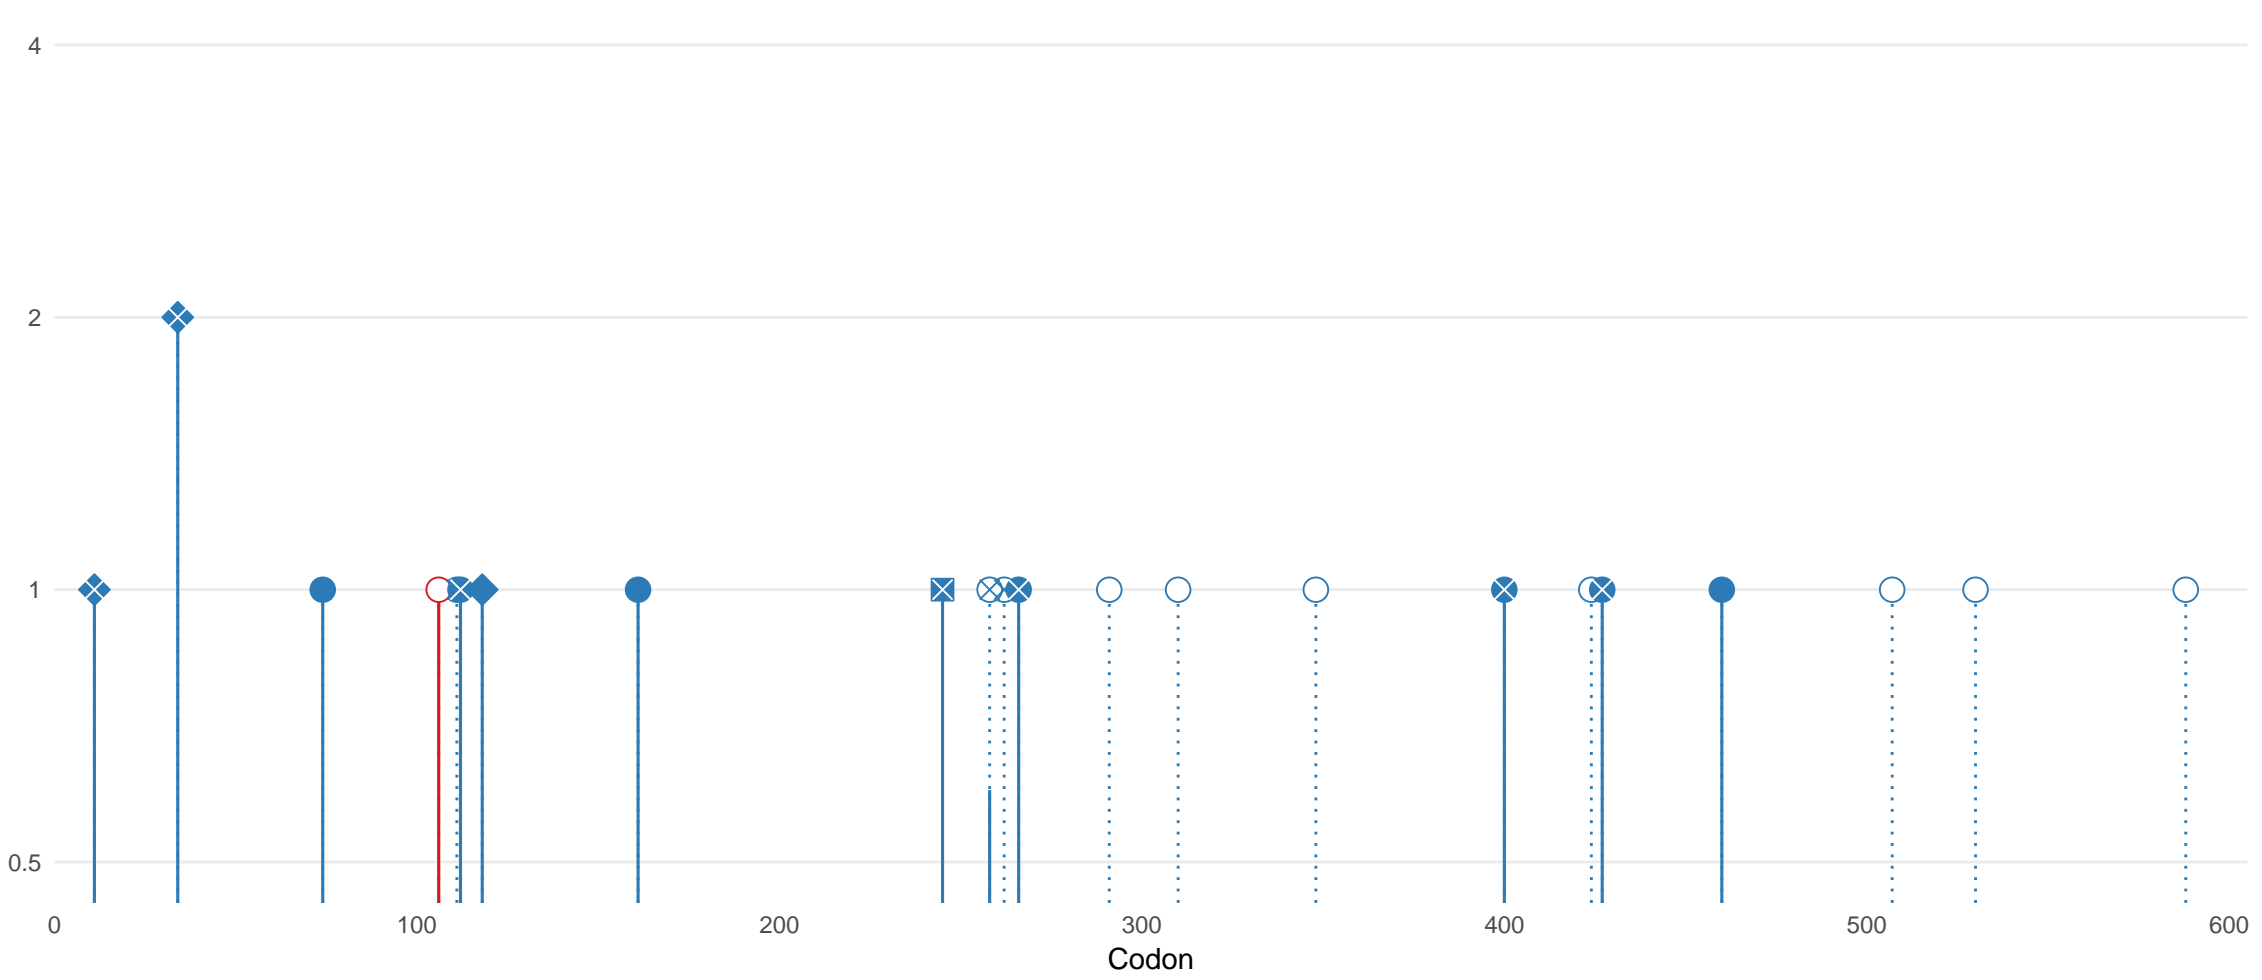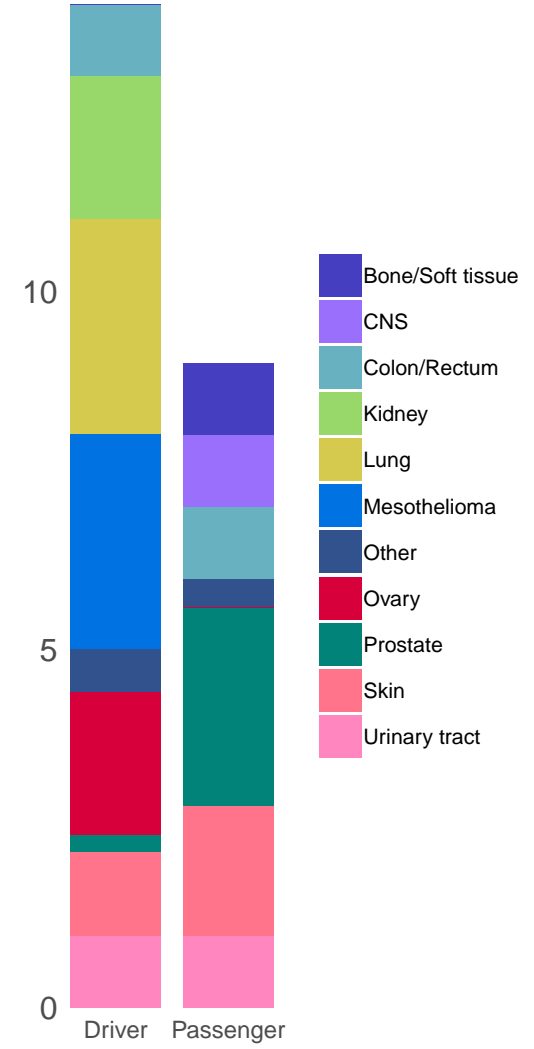

Monoallelic: ○ SNV □ MNV ◇ INDEL in frame ⊗ SNV nonsense ⊗ MNV nonsense ⊗ INDEL out of frame Biallelic/Multihit: ● SNV ■ MNV ◆ INDEL in frame ⊗ SNV nonsense ⊗ MNV nonsense ⊗ INDEL out of frame Hotspot: ●

# NFKBIE Variants

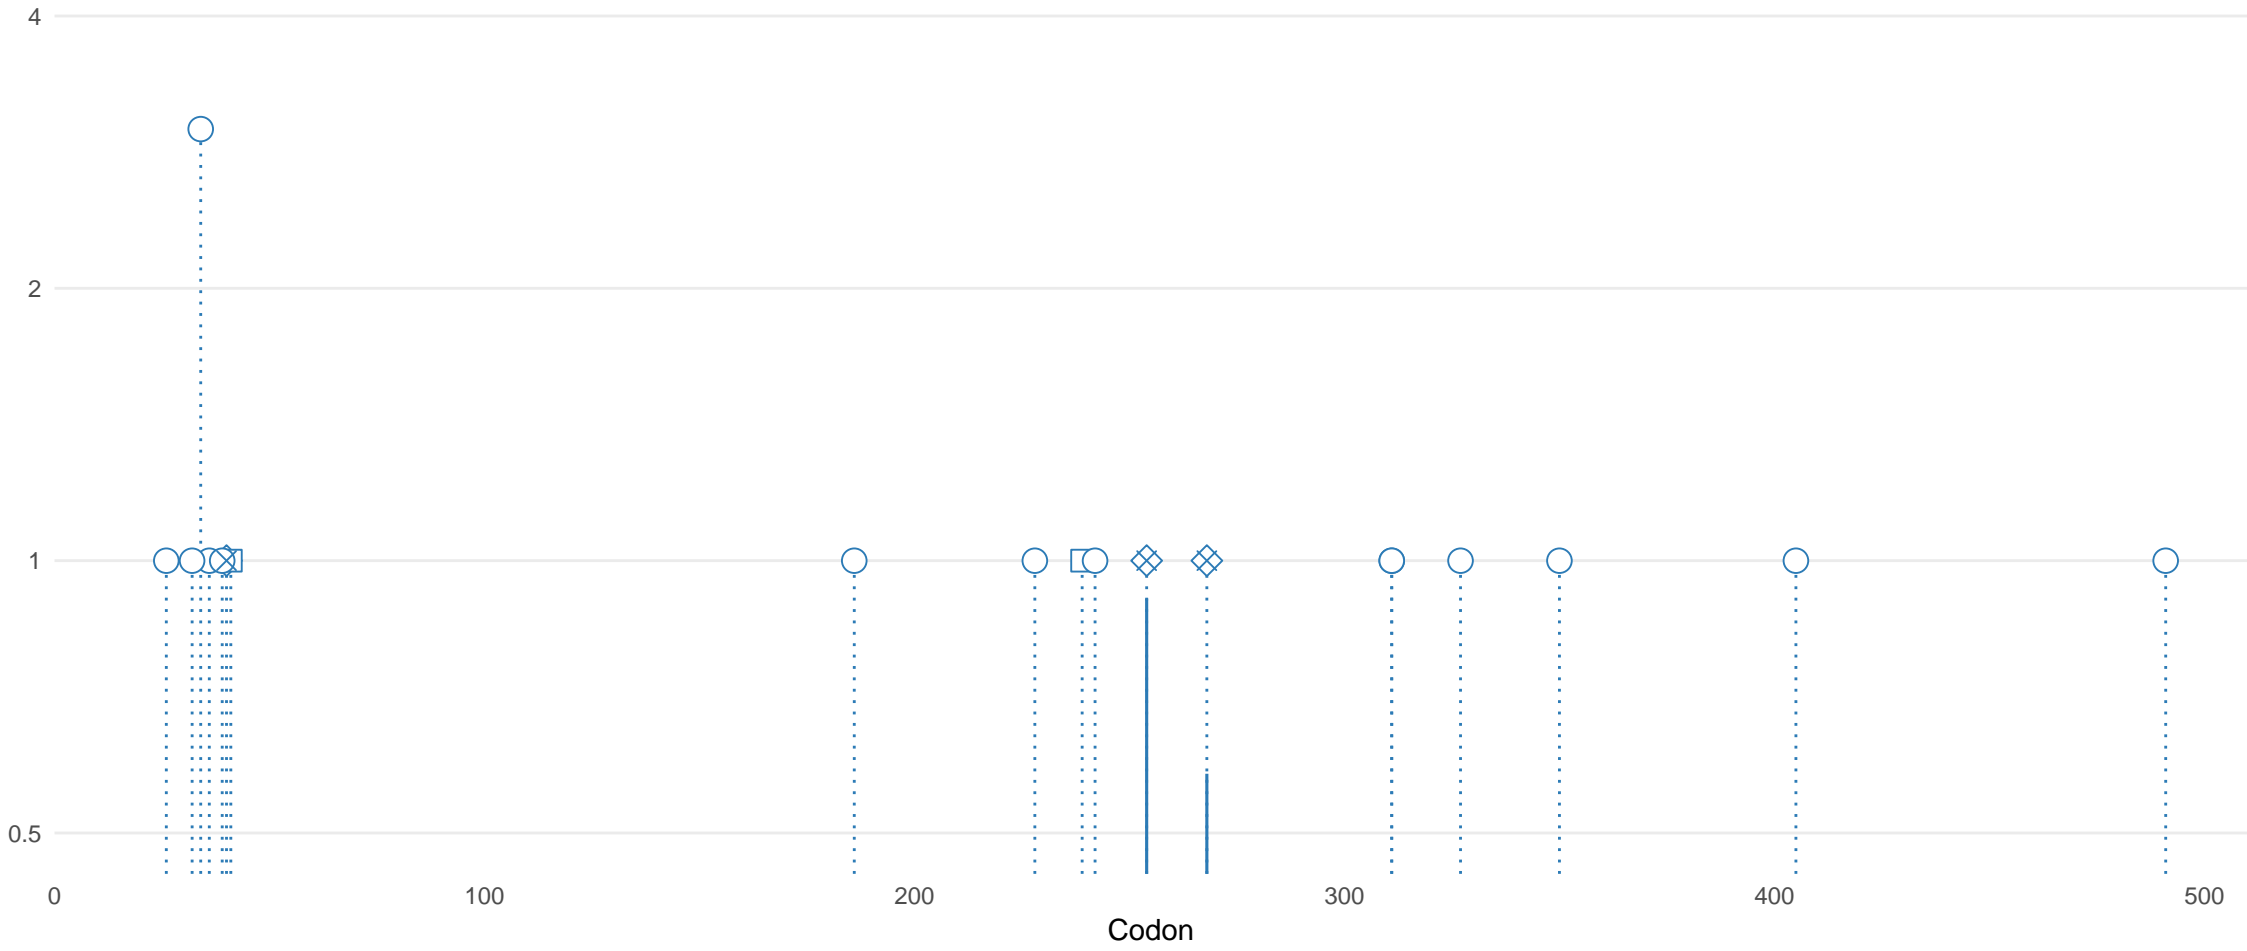

**Monoallelic:** ○ SNV □ MNV ◇ INDEL in frame ⊗ SNV nonsense ⊗ MNV nonsense ⊗ INDEL out of frame  
**Biallelic/Multihit:** ● SNV ■ MNV ◆ INDEL in frame ⊗ SNV nonsense ⊗ MNV nonsense ◆ INDEL out of frame  
**Hotspot:** ●

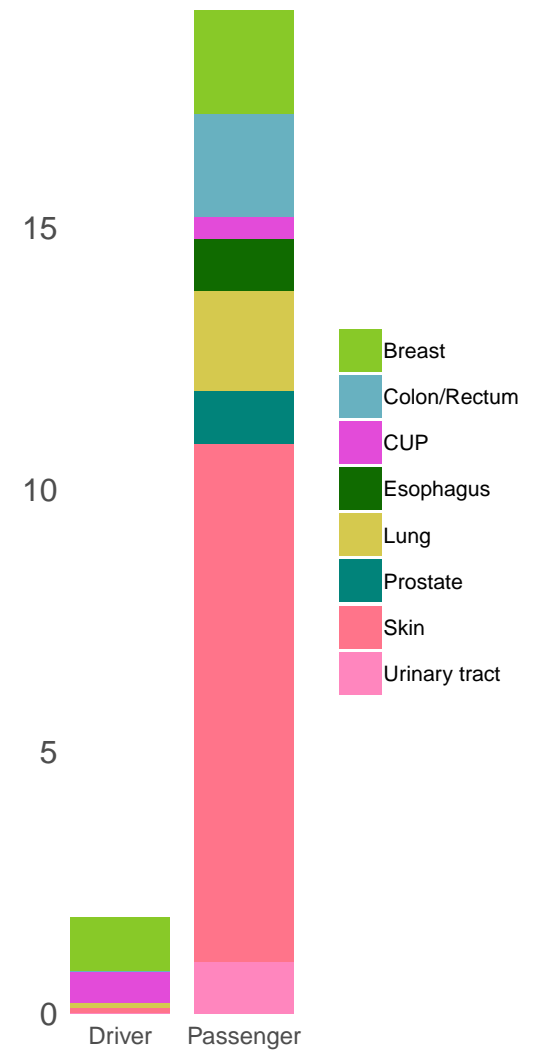



# NOTCH1 Variants

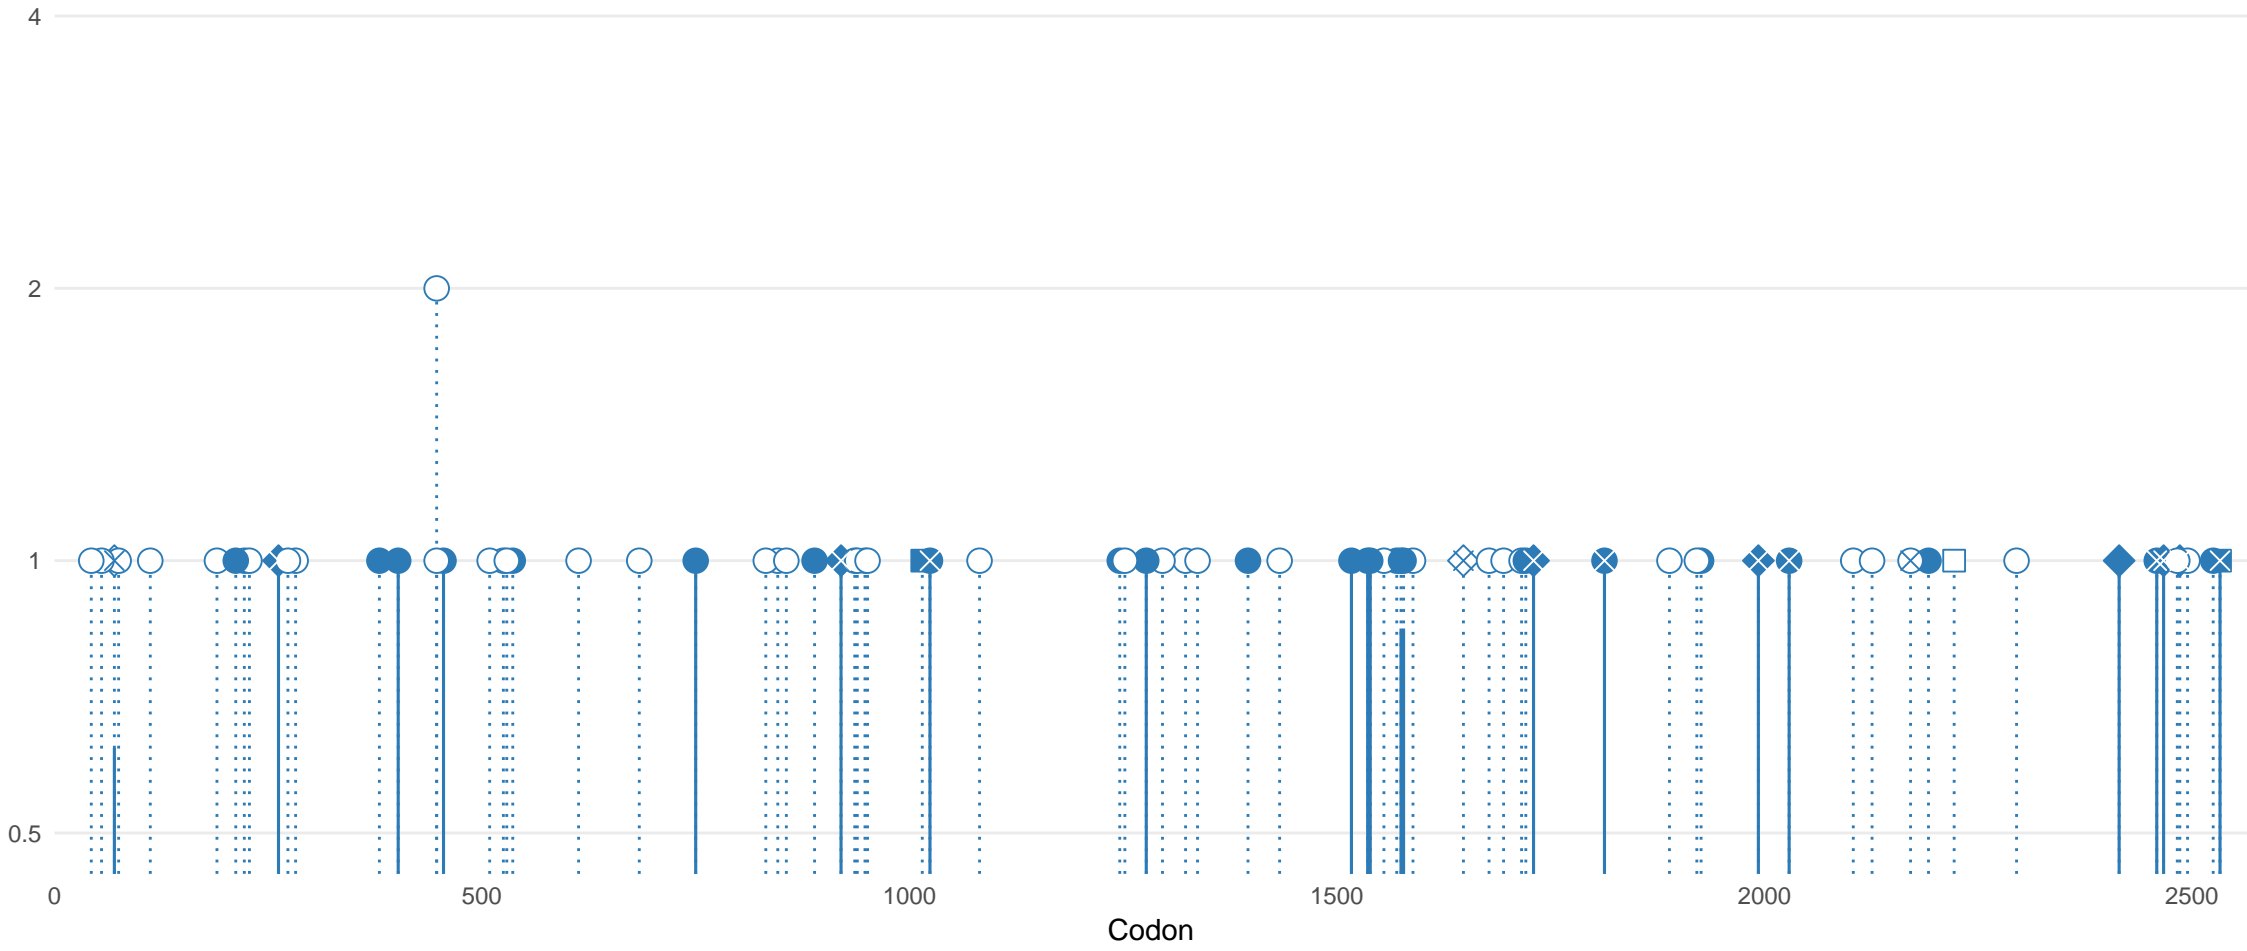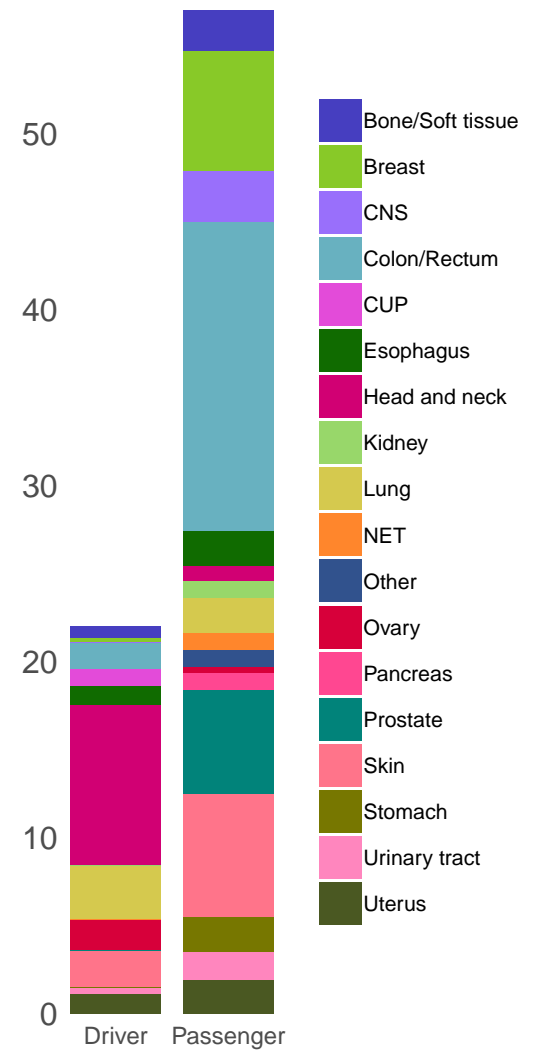

**Monoallelic:** ○ SNV □ MNV ◇ INDEL in frame ⊗ SNV nonsense ⊗ MNV nonsense ⊗ INDEL out of frame  
**Biallelic/Multihit:** ● SNV ■ MNV ◆ INDEL in frame ⊗ SNV nonsense ⊗ MNV nonsense ◆ INDEL out of frame  
**Hotspot:** ●

# NOTCH2 Variants

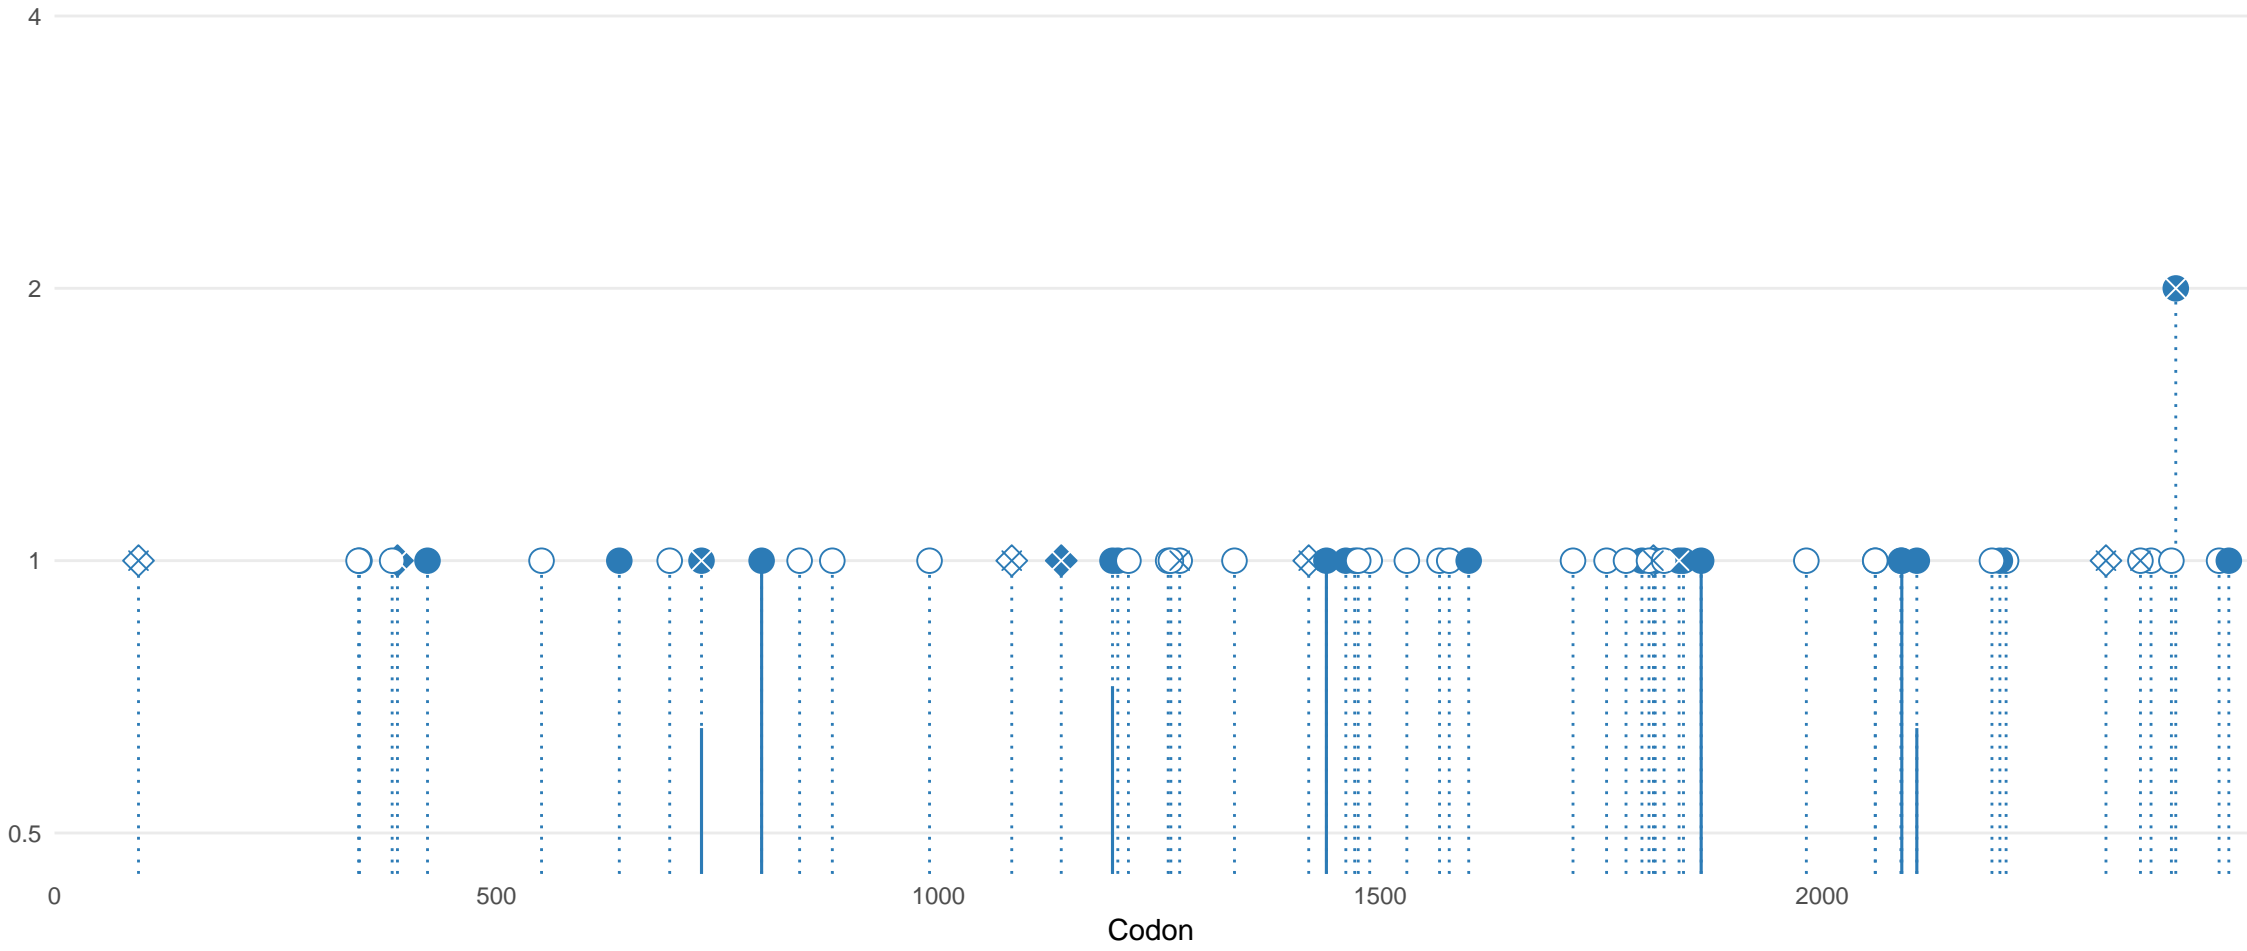

**Monoallelic:** ○ SNV □ MNV ◇ INDEL in frame ⊗ SNV nonsense ⊗ MNV nonsense ⊗ INDEL out of frame  
**Biallelic/Multihit:** ● SNV ■ MNV ◆ INDEL in frame ⊗ SNV nonsense ⊗ MNV nonsense ◆ INDEL out of frame  
**Hotspot:** ●

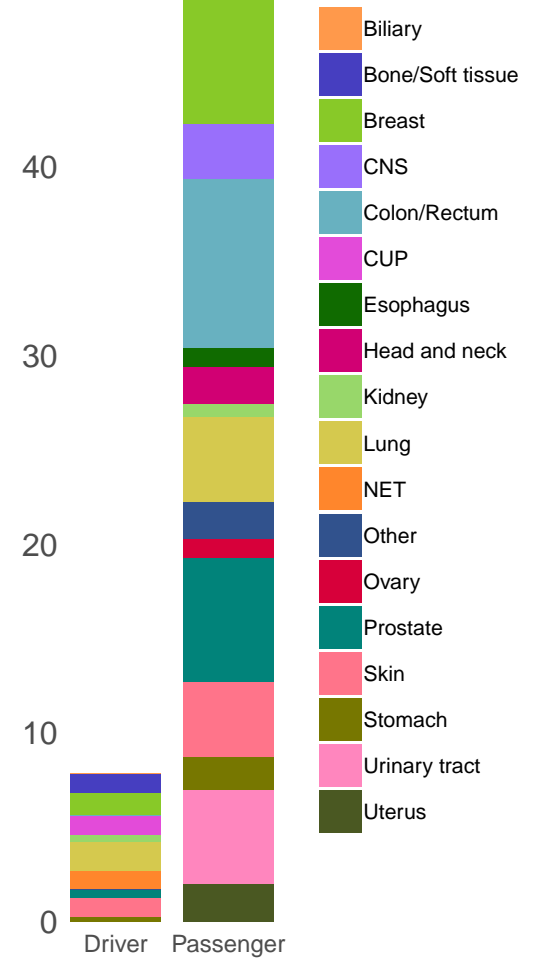

Driver Passenger

# NSD1 Variants

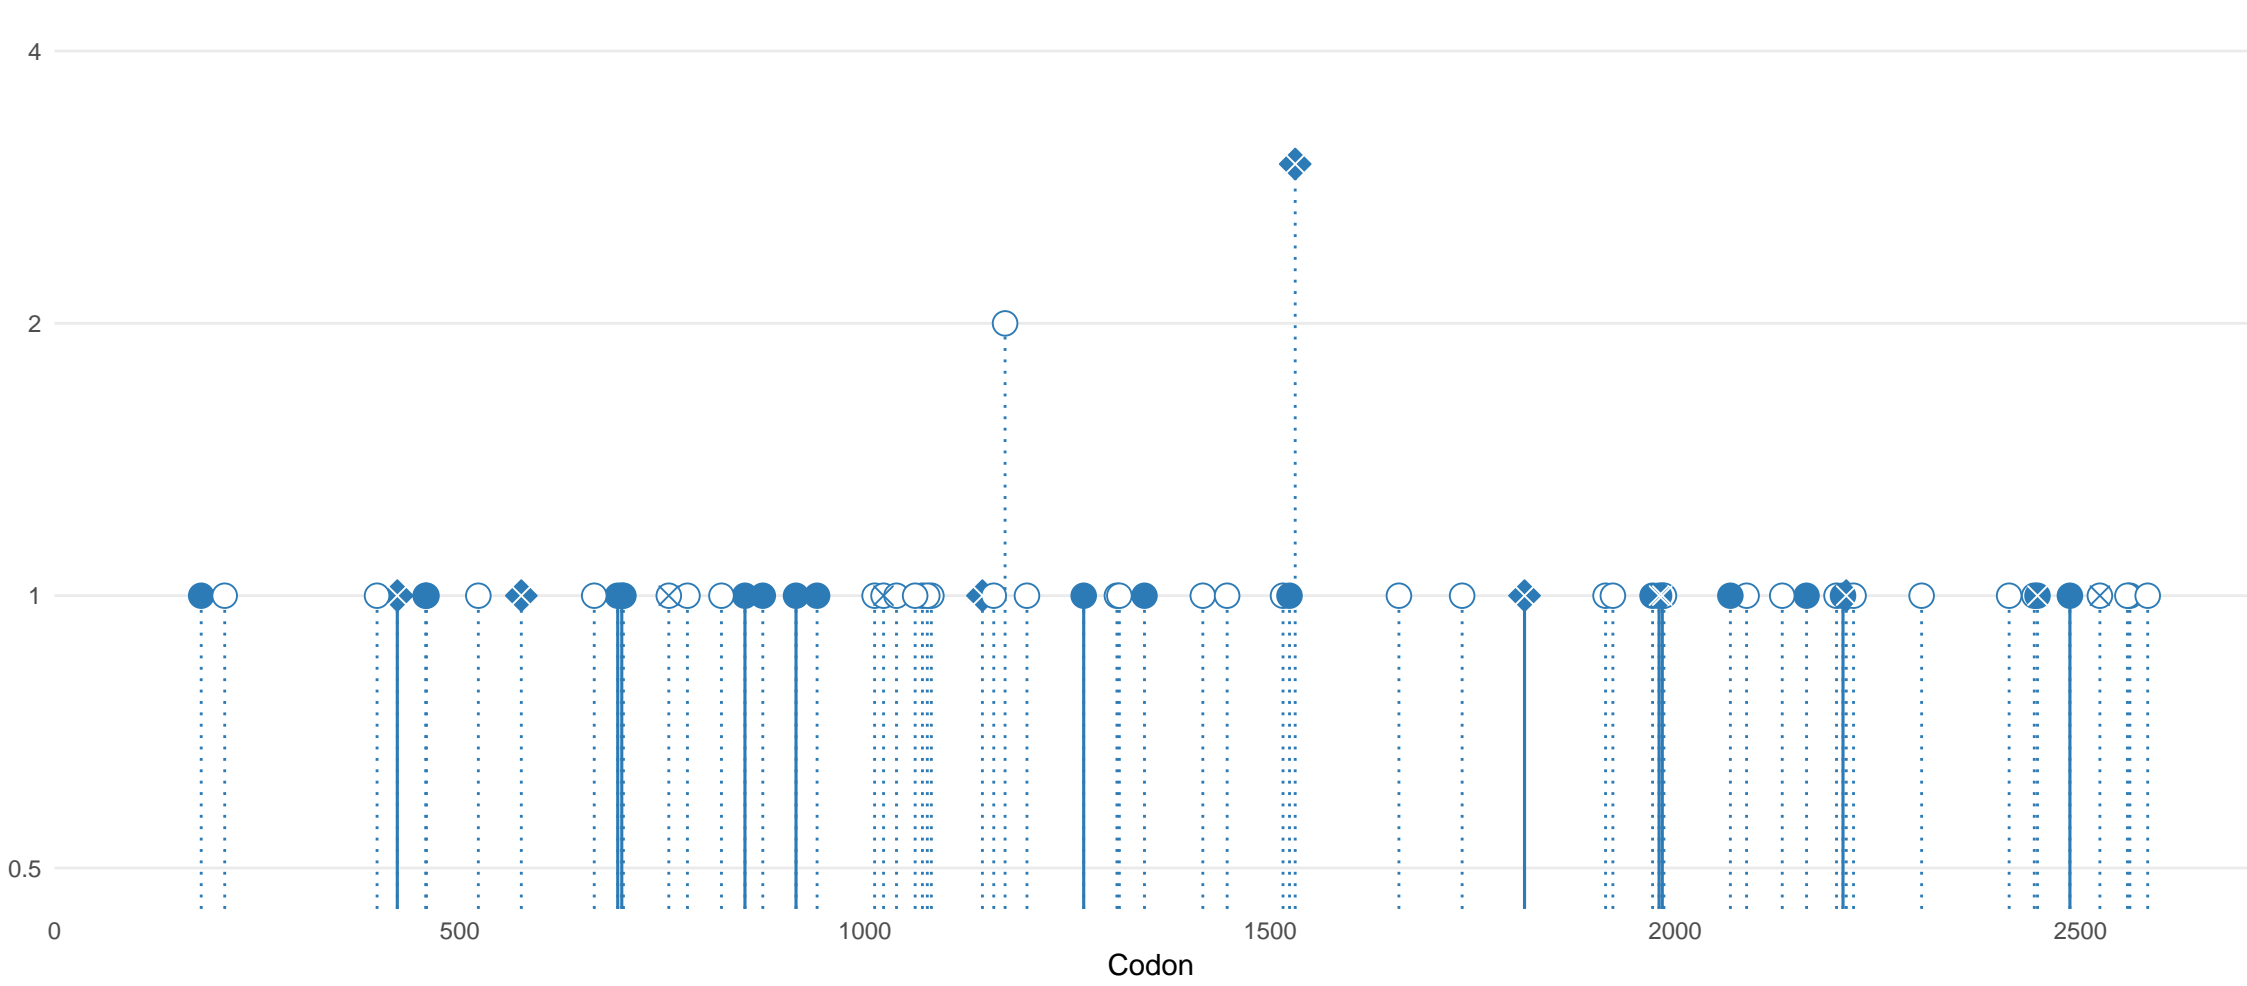

**Monoallelic:** ○ SNV □ MNV ◇ INDEL in frame ⊗ SNV nonsense ⊗ MNV nonsense ⊗ INDEL out of frame  
**Biallelic/Multihit:** ● SNV ■ MNV ◆ INDEL in frame ⊗ SNV nonsense ⊗ MNV nonsense ◆ INDEL out of frame  
**Hotspot:** ●

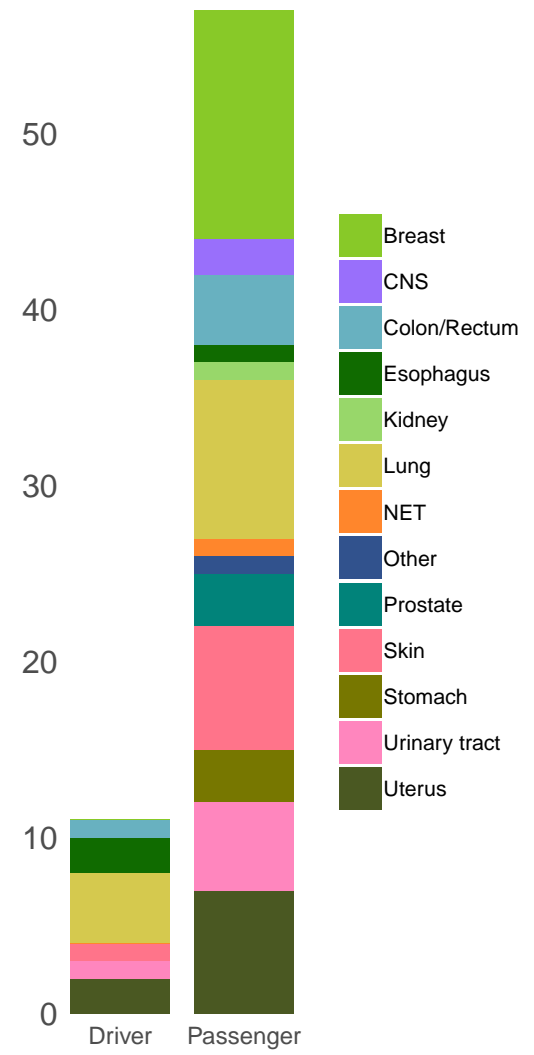

# OR4N2 Variants

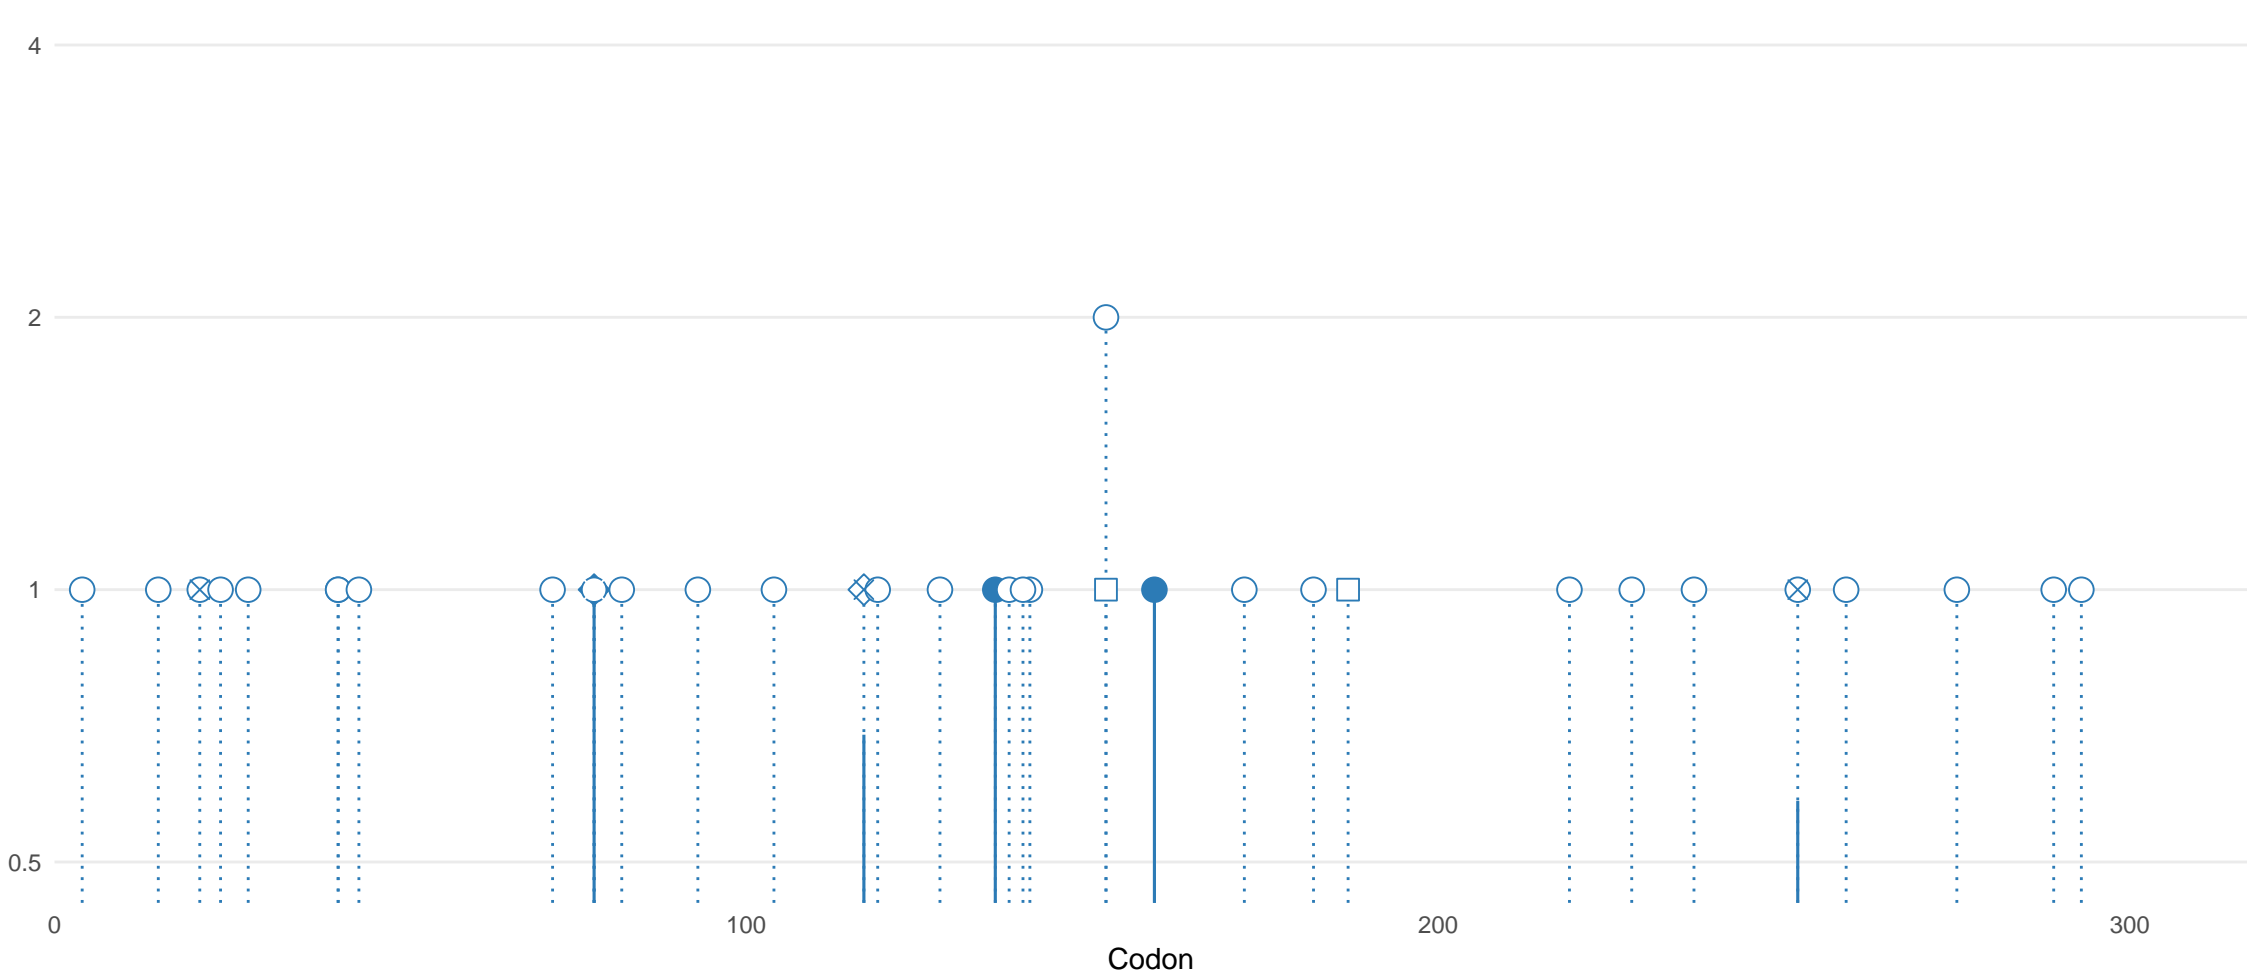

Monoallelic: ○ SNV □ MNV ◇ INDEL in frame ⊗ SNV nonsense ⊗ MNV nonsense ⊗ INDEL out of frame  
 Biallelic/Multihit: ● SNV ■ MNV ◆ INDEL in frame ⊗ SNV nonsense ⊗ MNV nonsense ⊗ INDEL out of frame  
 Hotspot: ●

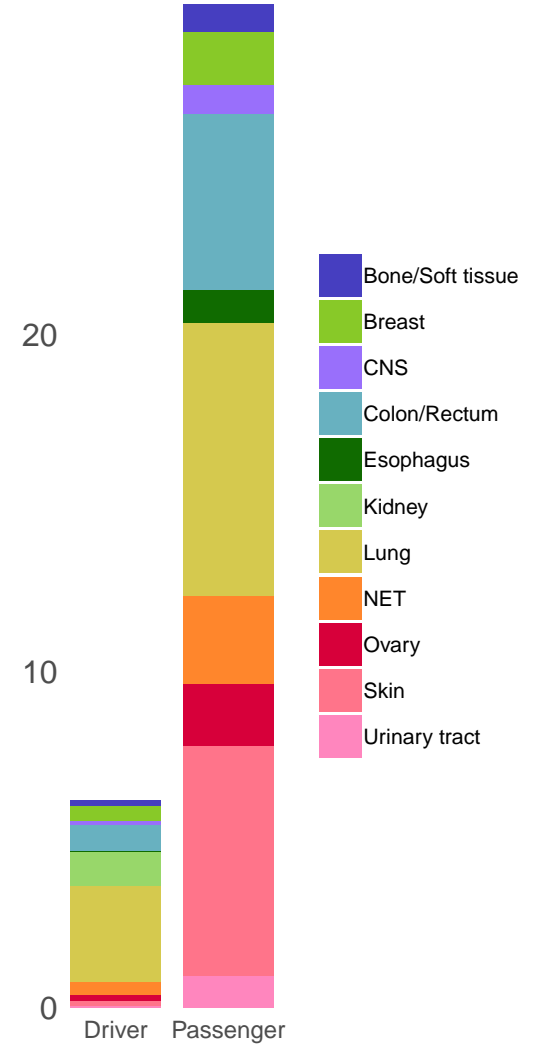

# PBRM1 Variants

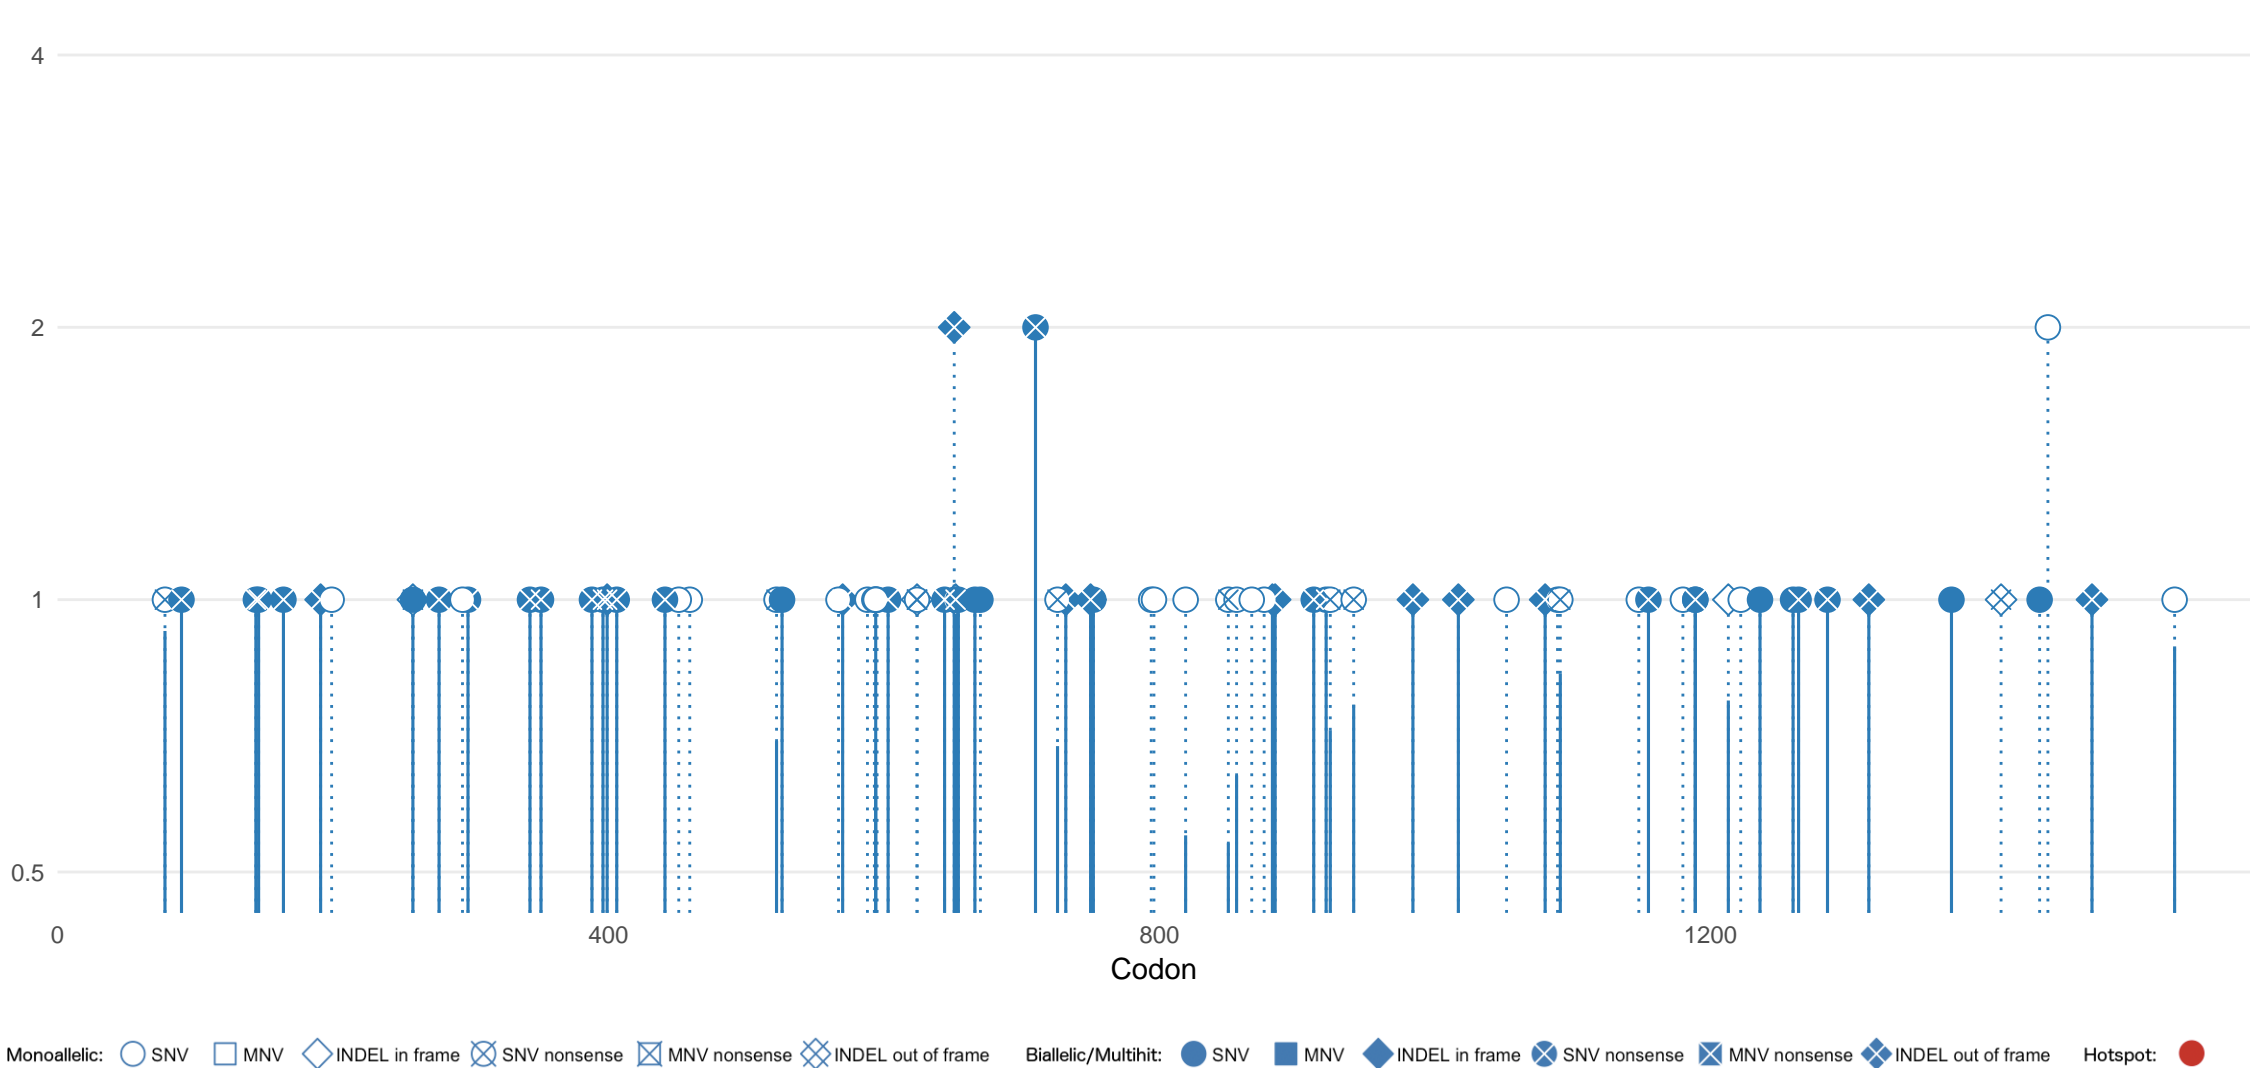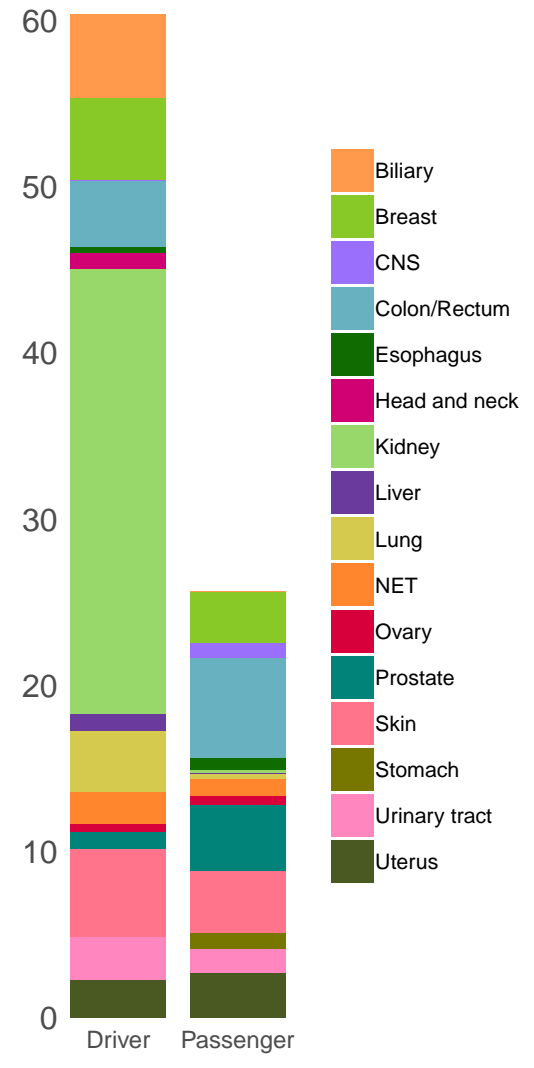

# PHF6 Variants

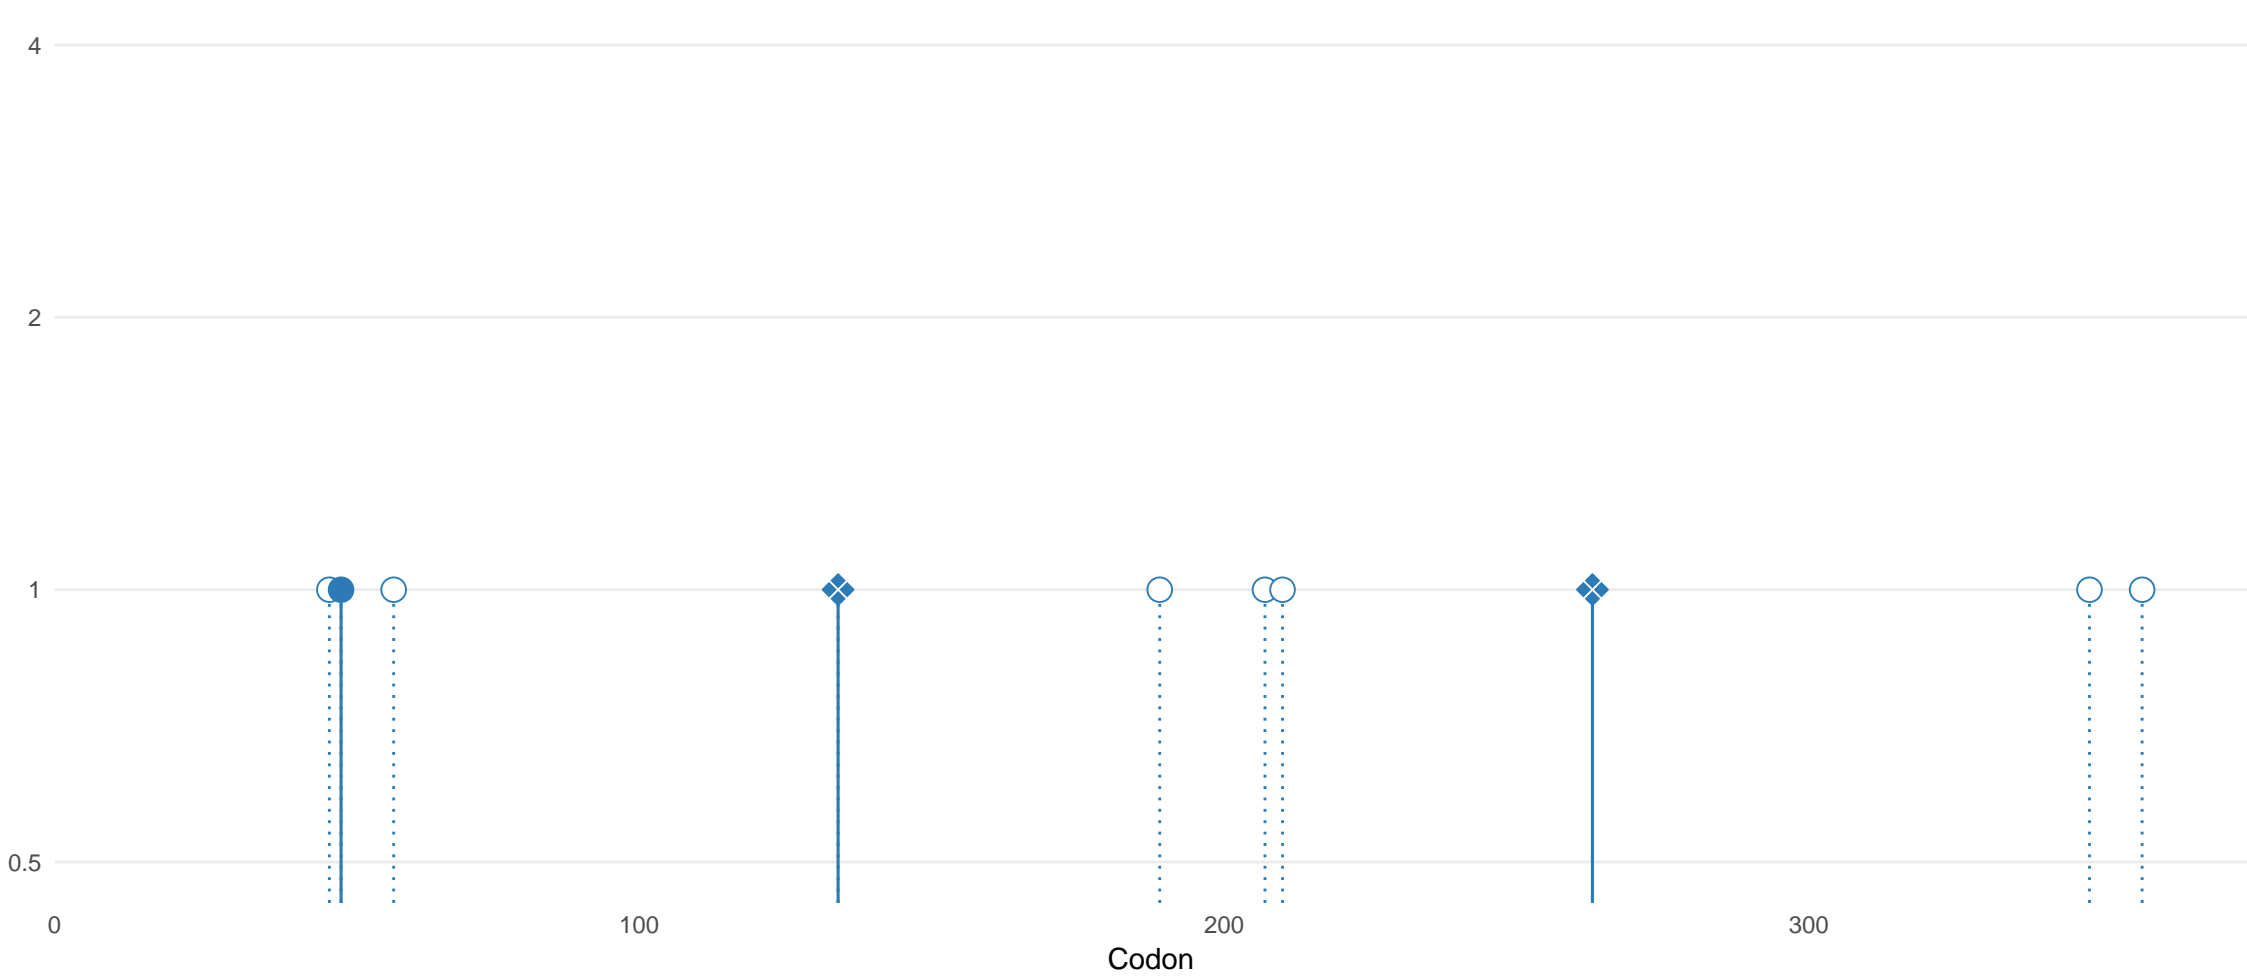

**Monoallelic:** ○ SNV □ MNV ◇ INDEL in frame ⊗ SNV nonsense ⊗ MNV nonsense ⊗ INDEL out of frame  
**Biallelic/Multihit:** ● SNV ■ MNV ◆ INDEL in frame ⊗ SNV nonsense ⊗ MNV nonsense ◆ INDEL out of frame  
**Hotspot:** ●

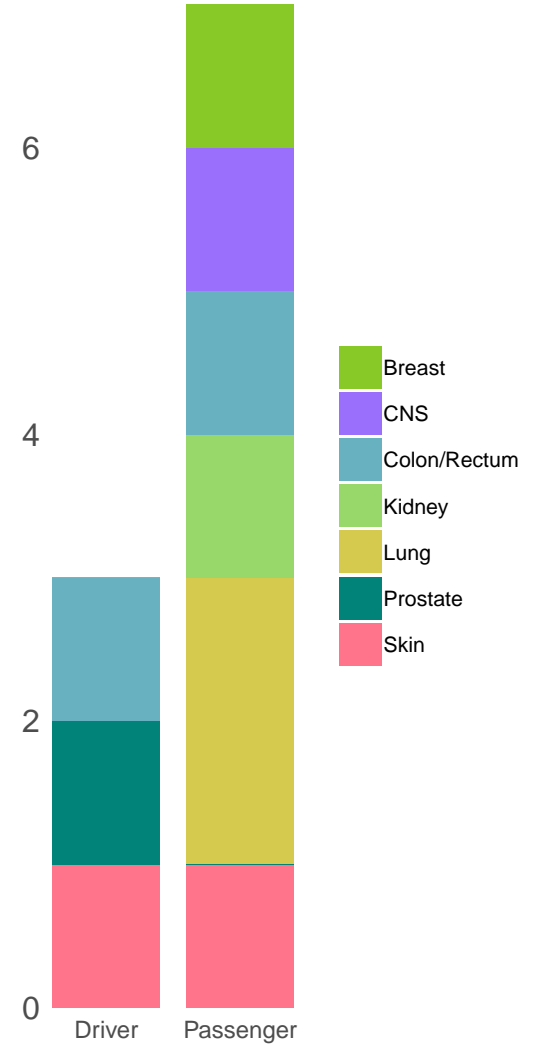

■ Breast  
■ CNS  
■ Colon/Rectum  
■ Kidney  
■ Lung  
■ Prostate  
■ Skin

# PHOX2B Variants

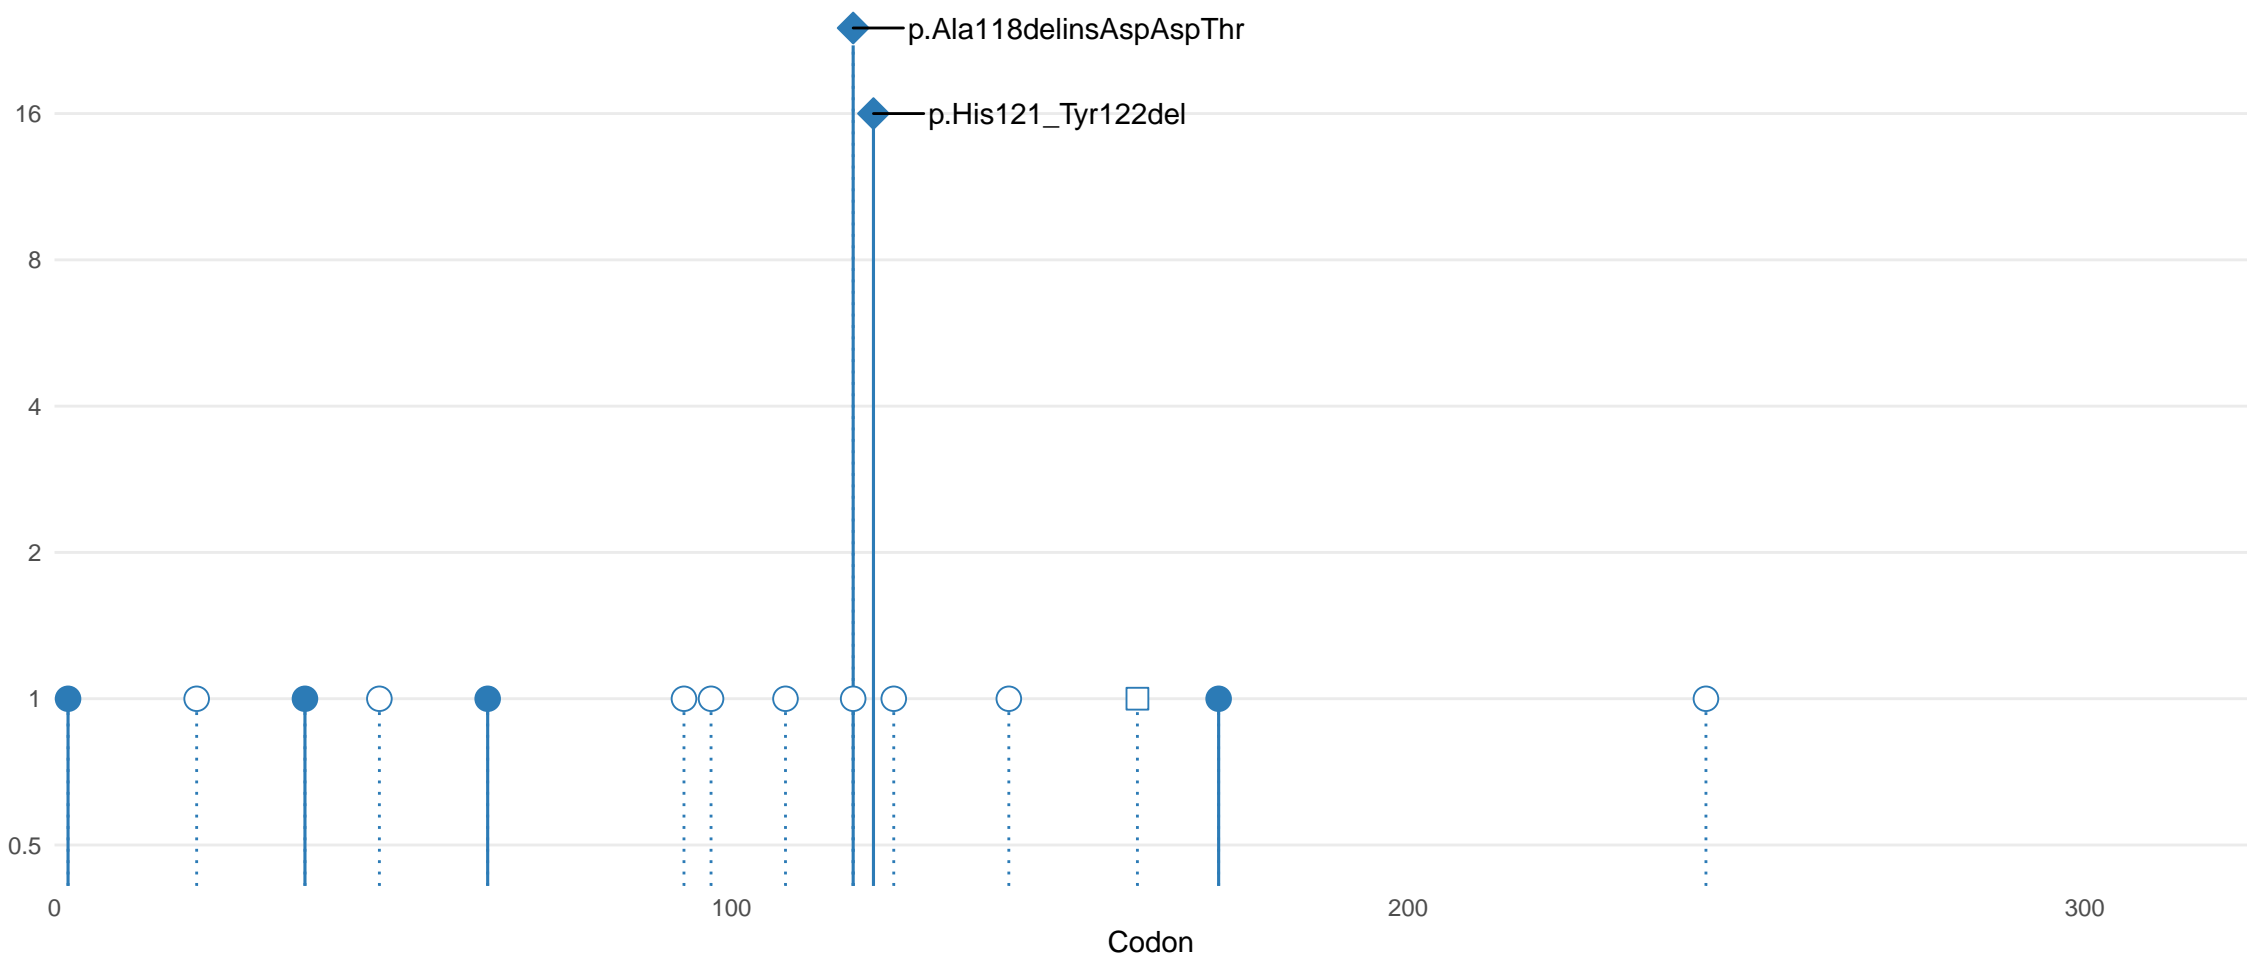

Monoallelic: ○ SNV □ MNV ◇ INDEL in frame ⊗ SNV nonsense ⊗ MNV nonsense ⊗ INDEL out of frame  
 Biallelic/Multihit: ● SNV ■ MNV ◆ INDEL in frame ⊗ SNV nonsense ⊗ MNV nonsense ◆ INDEL out of frame Hotspot: ●

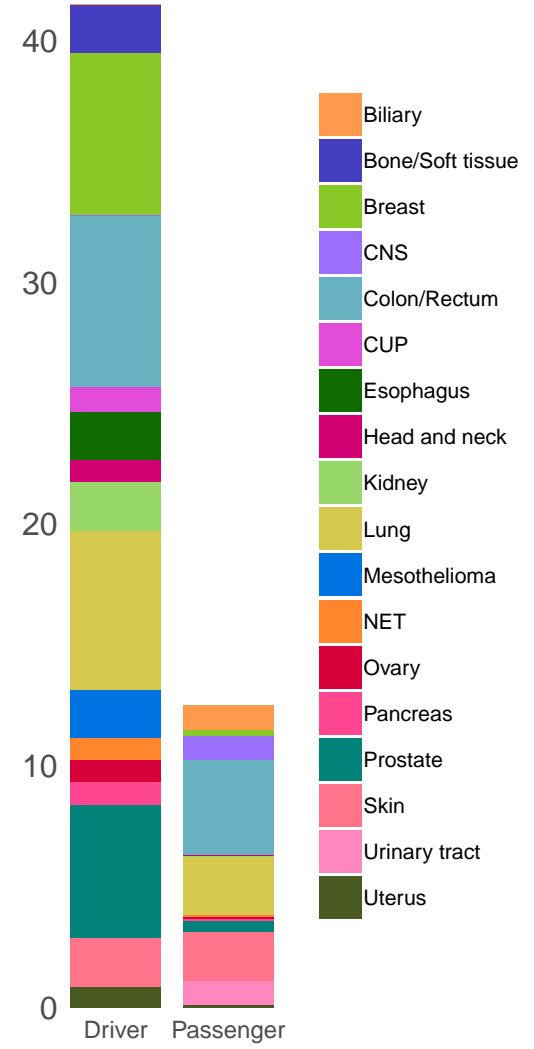

# PIK3R1 Variants

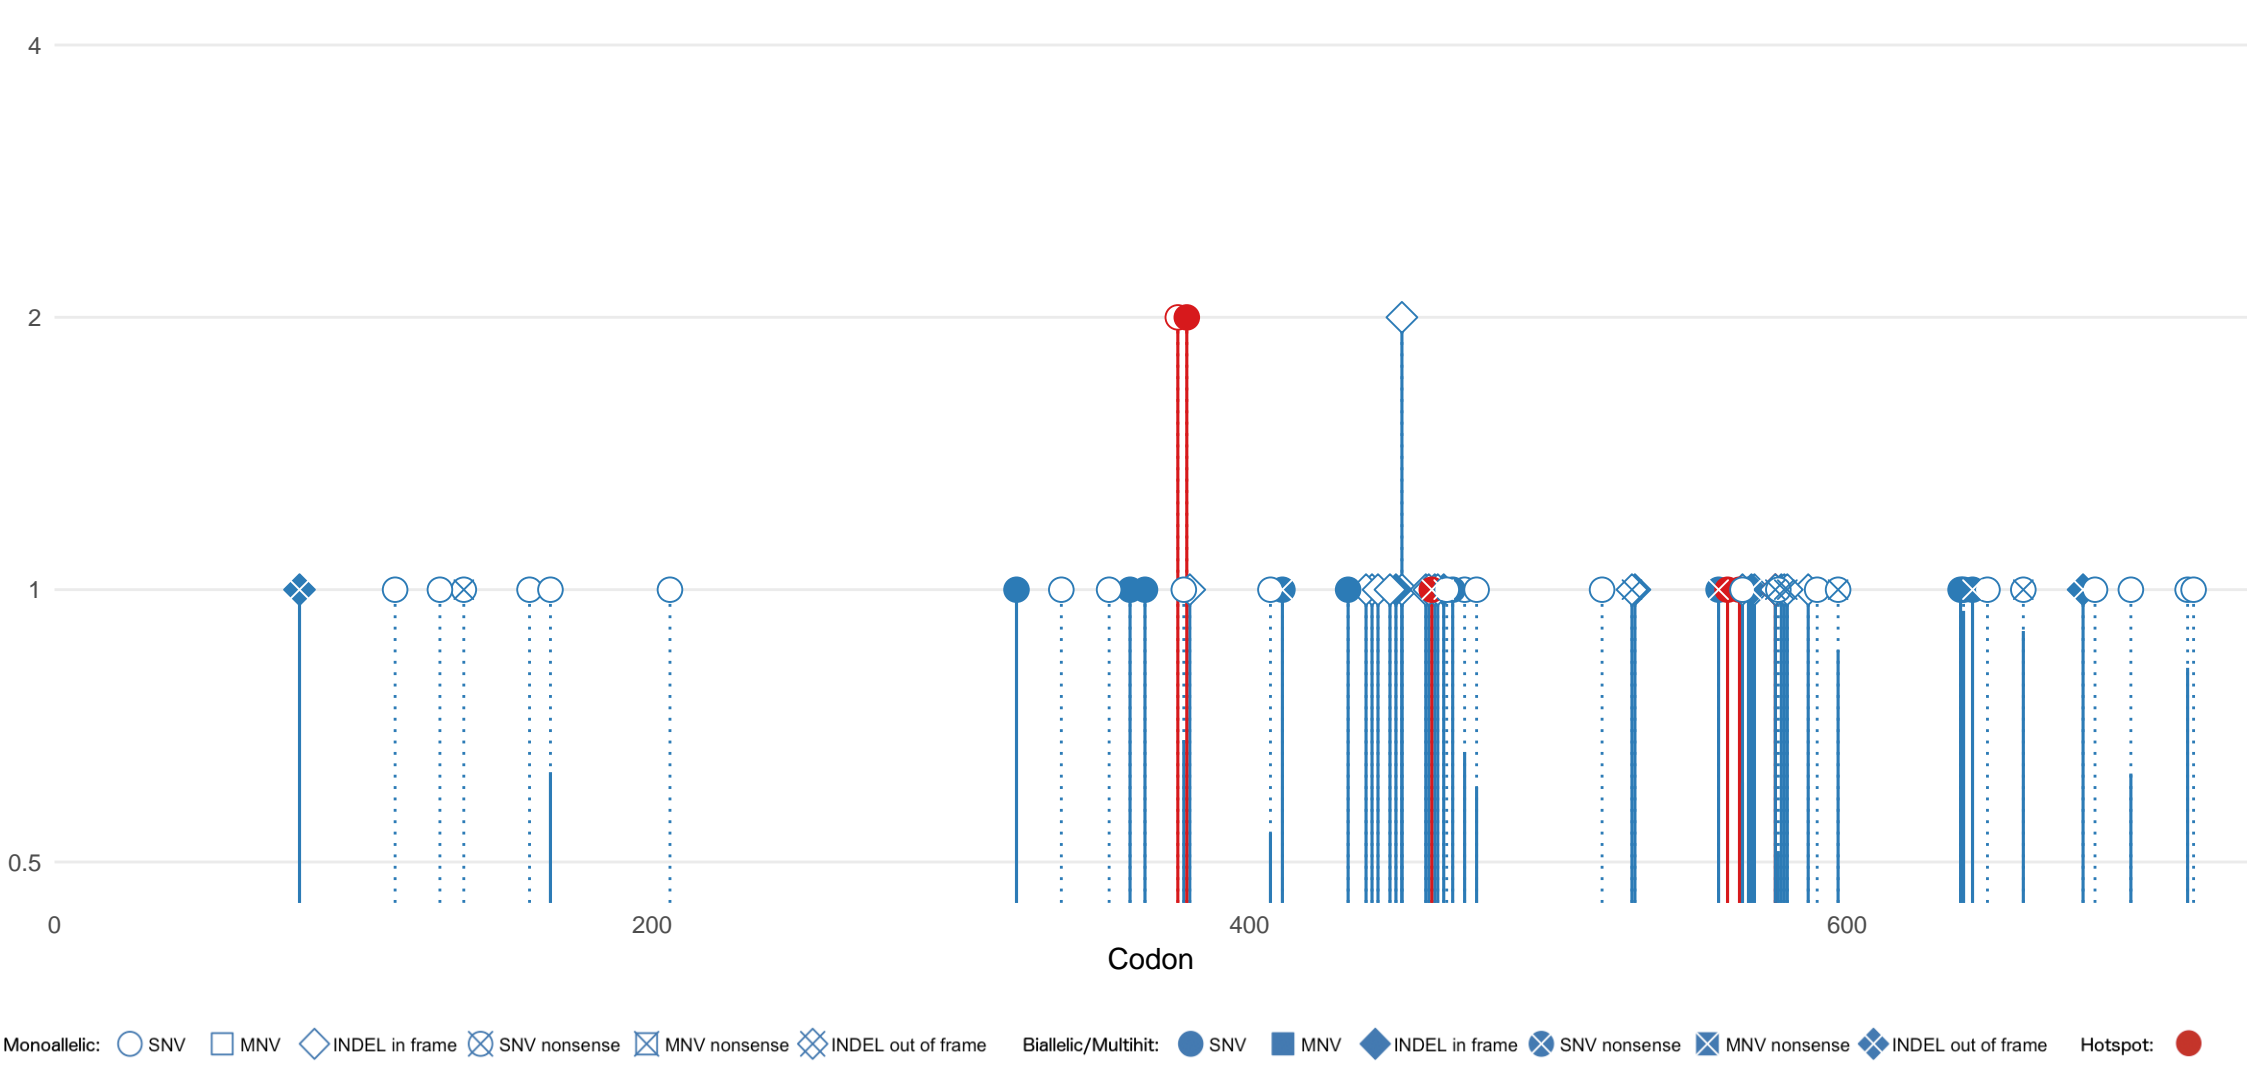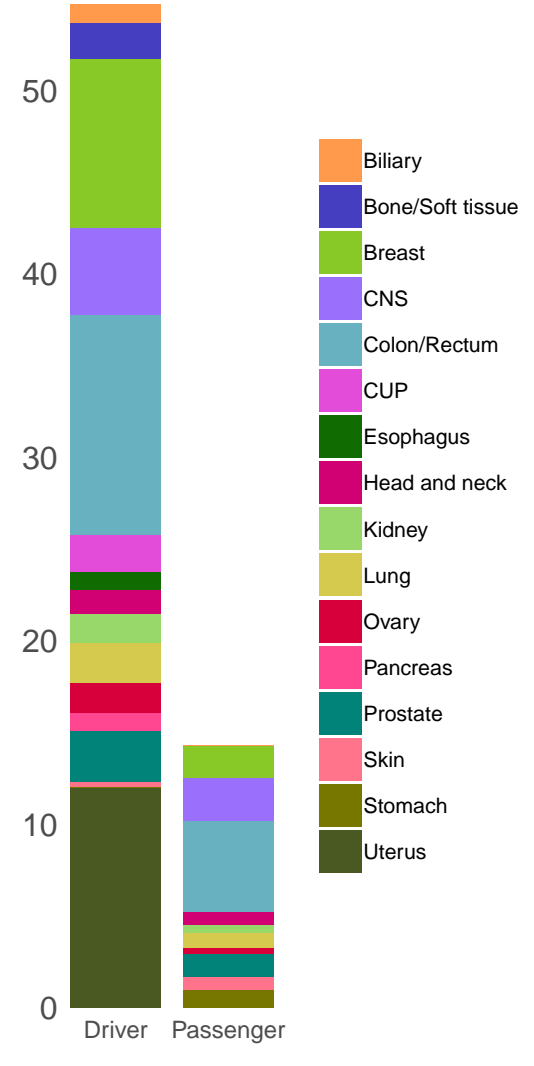



# POLE Variants

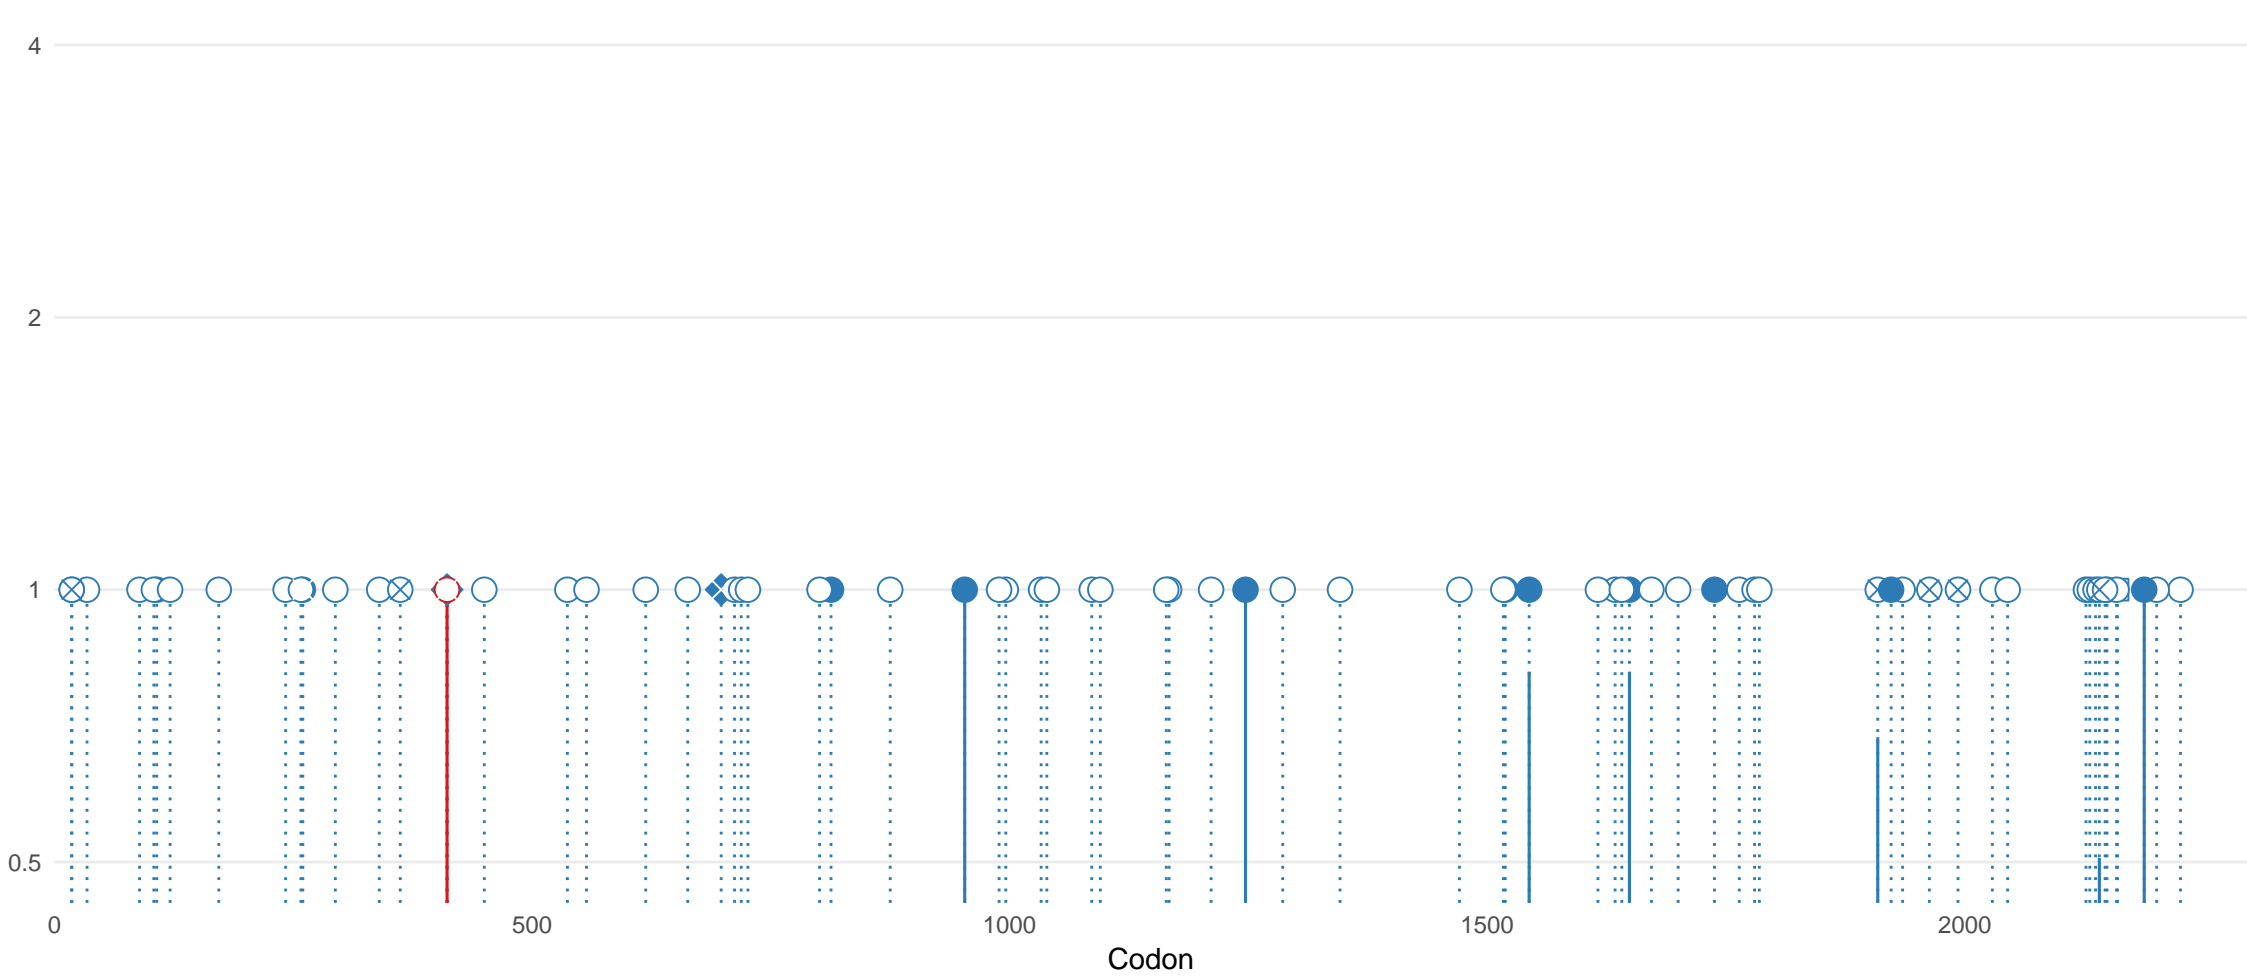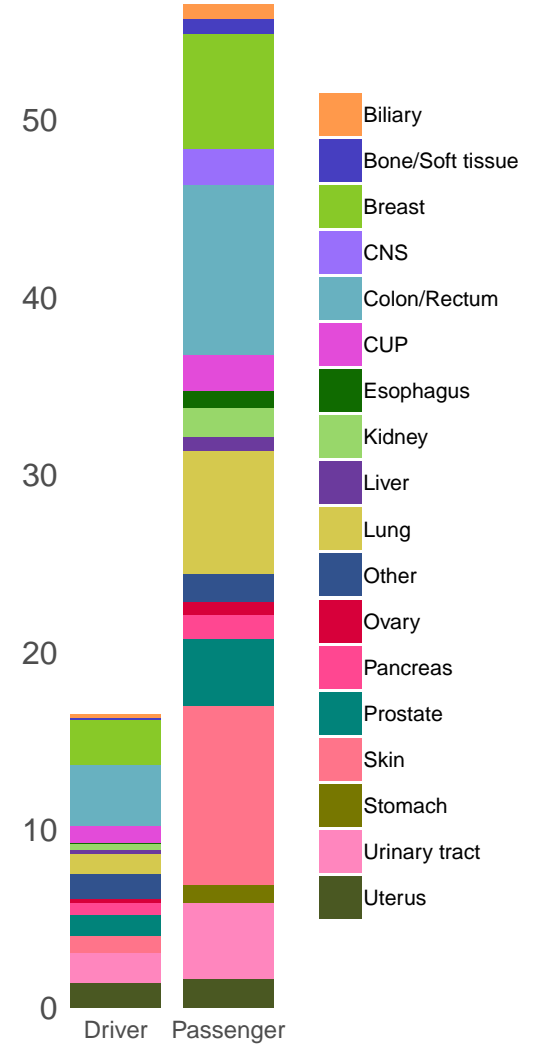

# POT1 Variants

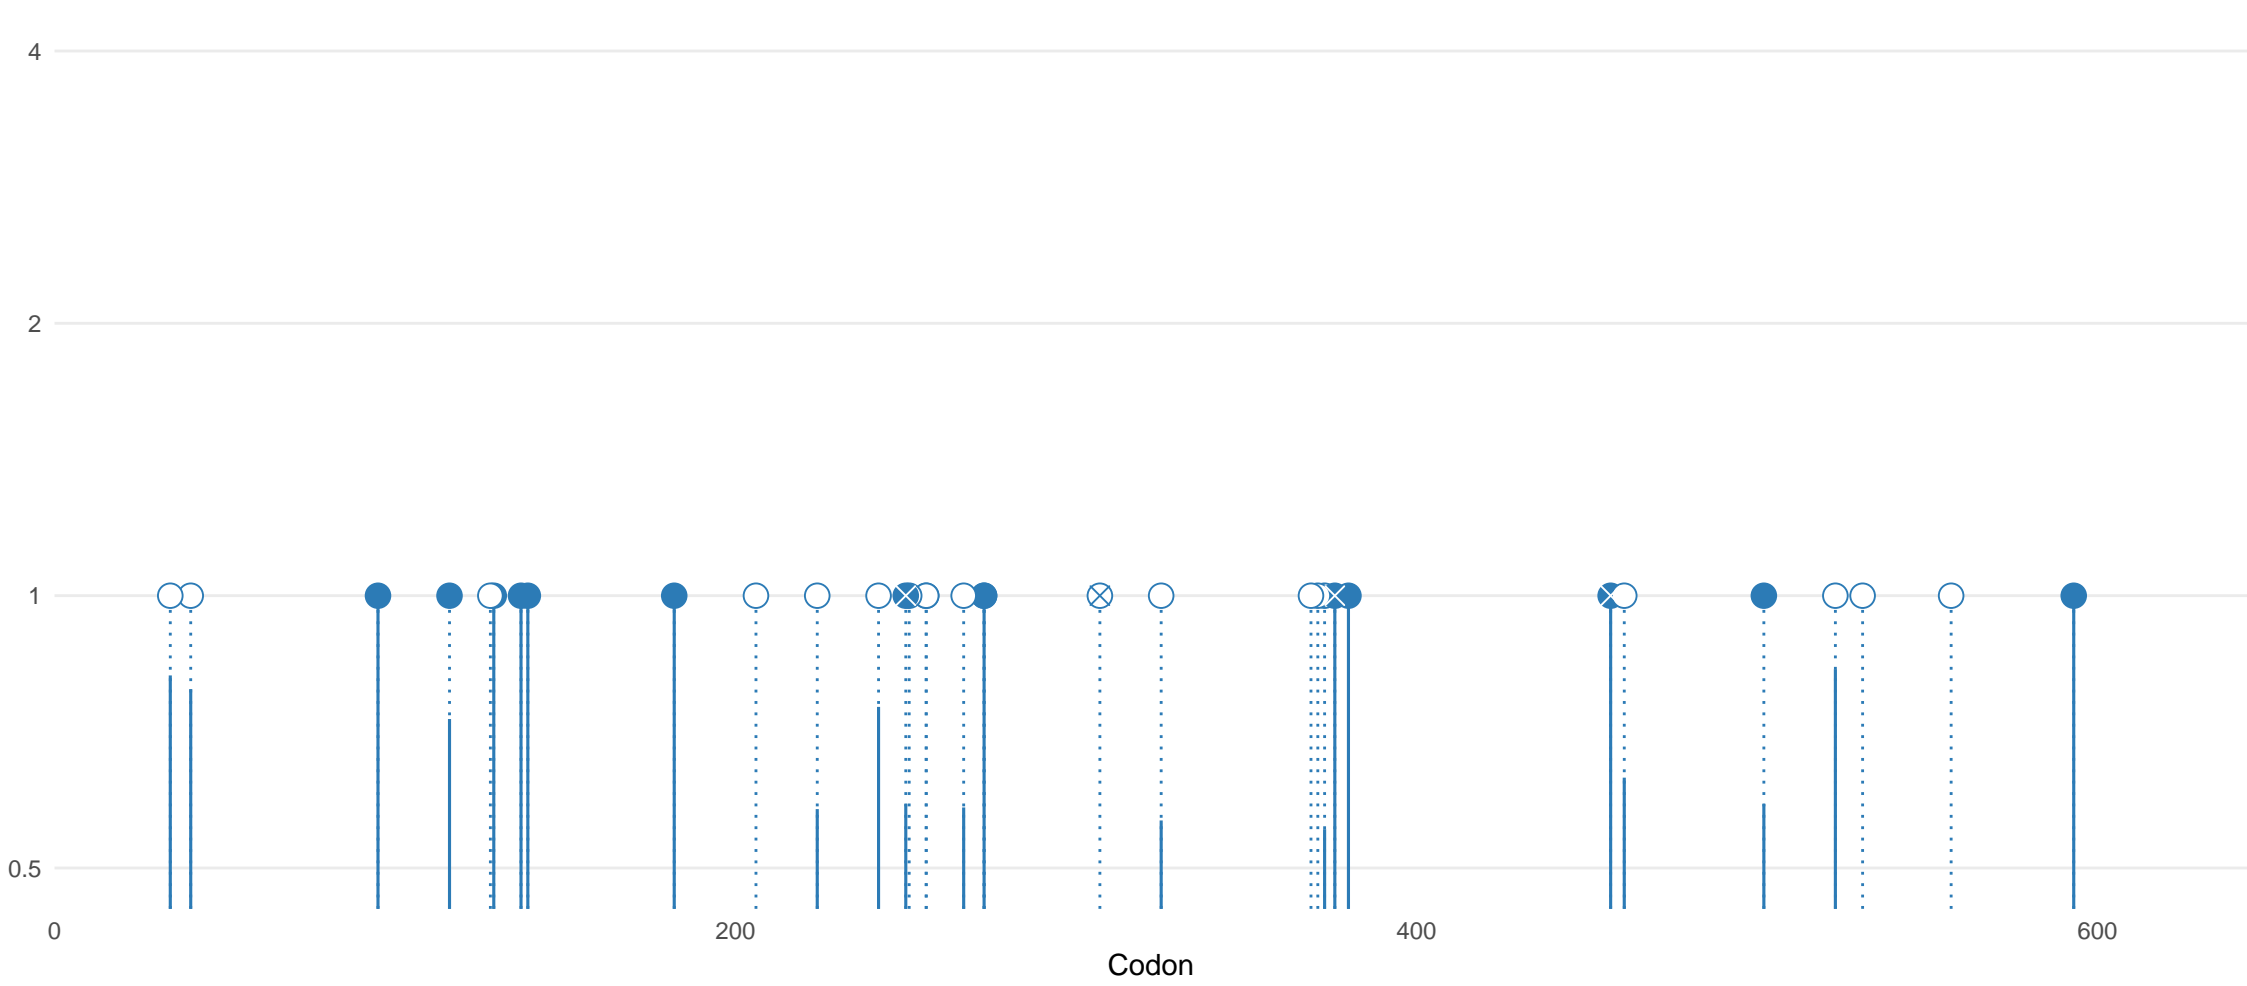

**Monoallelic:** ○ SNV □ MNV ◇ INDEL in frame ⊗ SNV nonsense ⊗ MNV nonsense ⊗ INDEL out of frame  
**Biallelic/Multihit:** ● SNV ■ MNV ◆ INDEL in frame ⊗ SNV nonsense ⊗ MNV nonsense ◆ INDEL out of frame  
**Hotspot:** ●

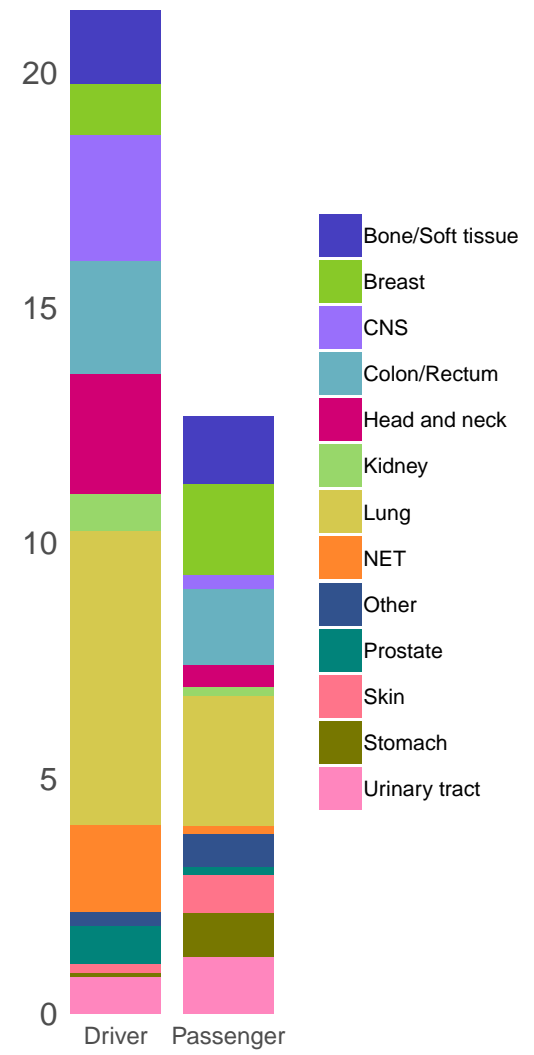

# PPM1D Variants

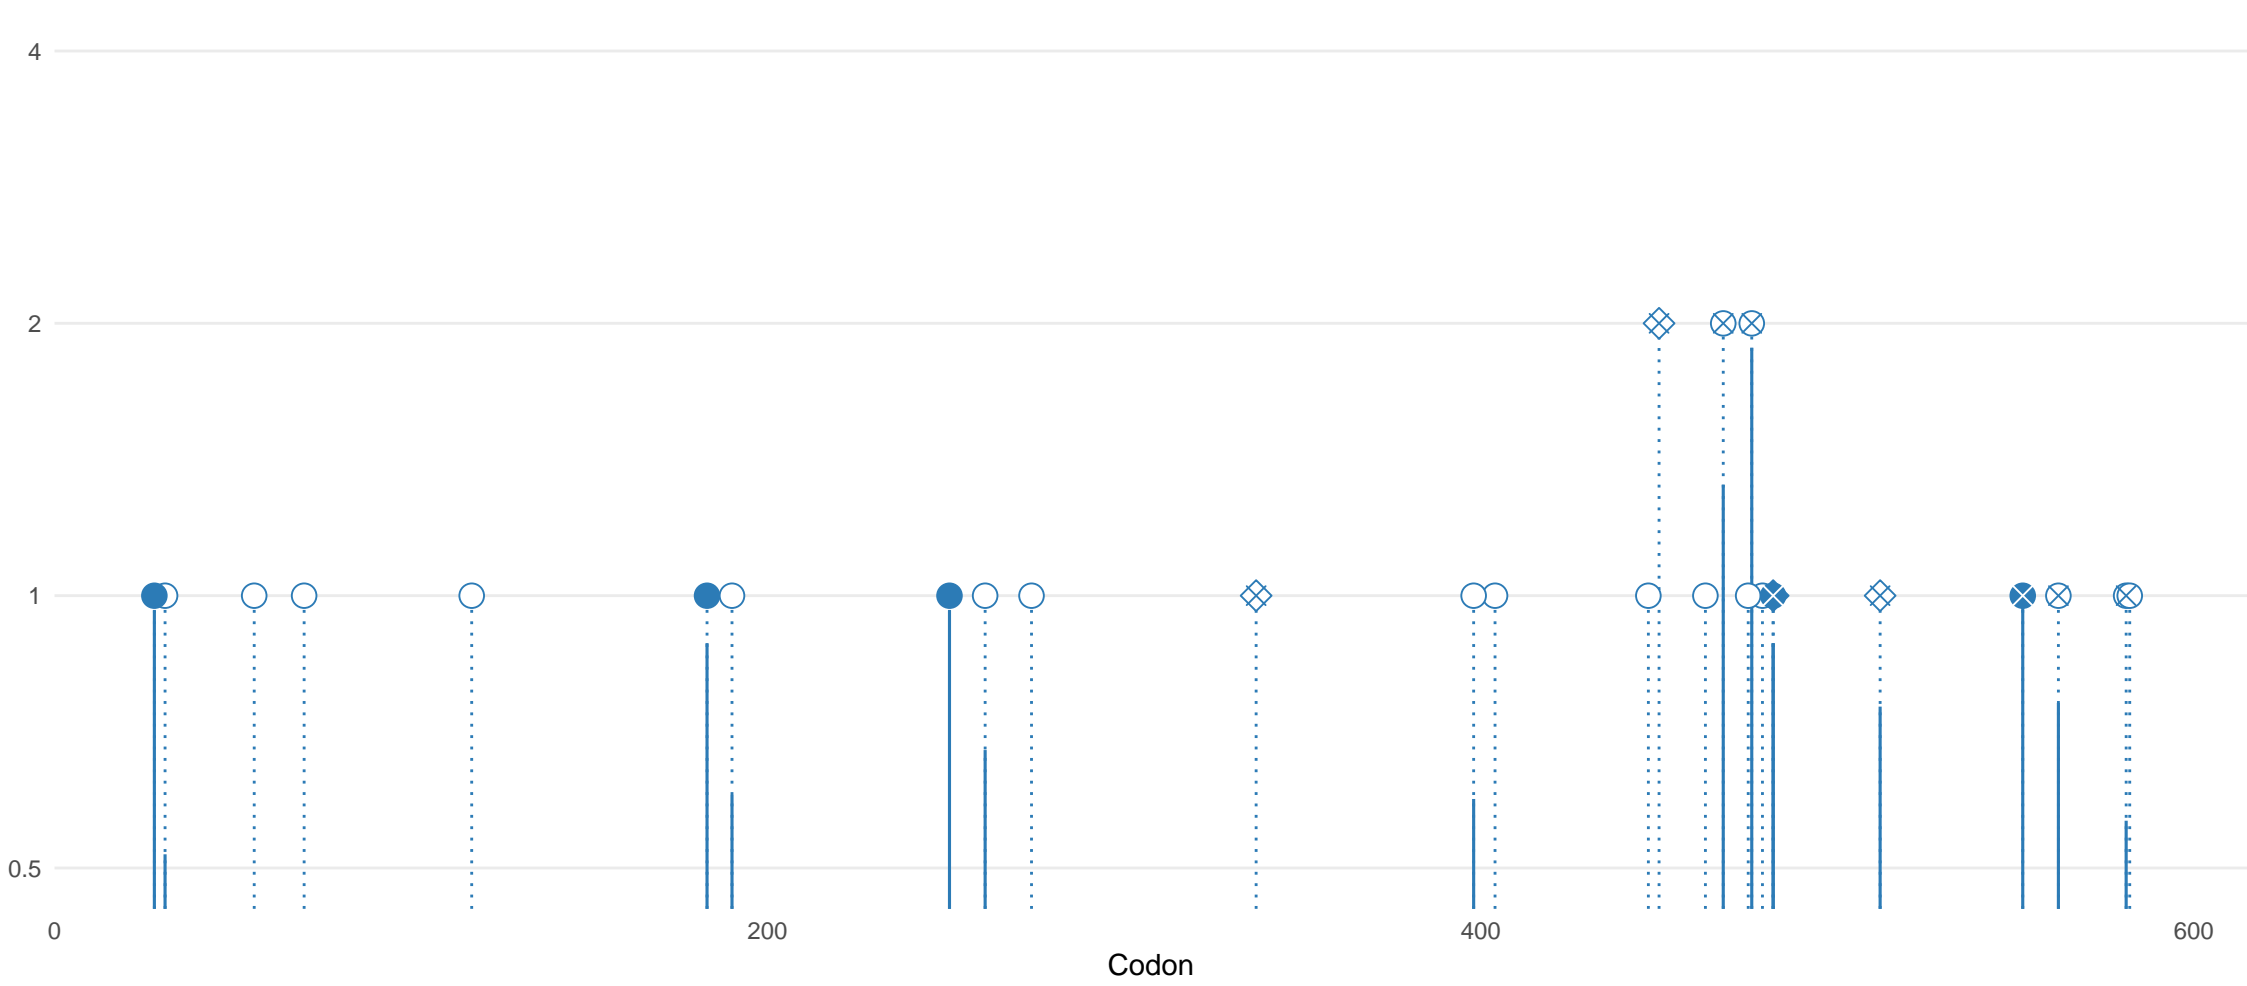

Monoallelic: ○ SNV □ MNV ◇ INDEL in frame ⊗ SNV nonsense ⊗ MNV nonsense ◇ INDEL out of frame  
 Biallelic/Multihit: ● SNV ■ MNV ◆ INDEL in frame ⊗ SNV nonsense ⊗ MNV nonsense ◆ INDEL out of frame  
 Hotspot: ●

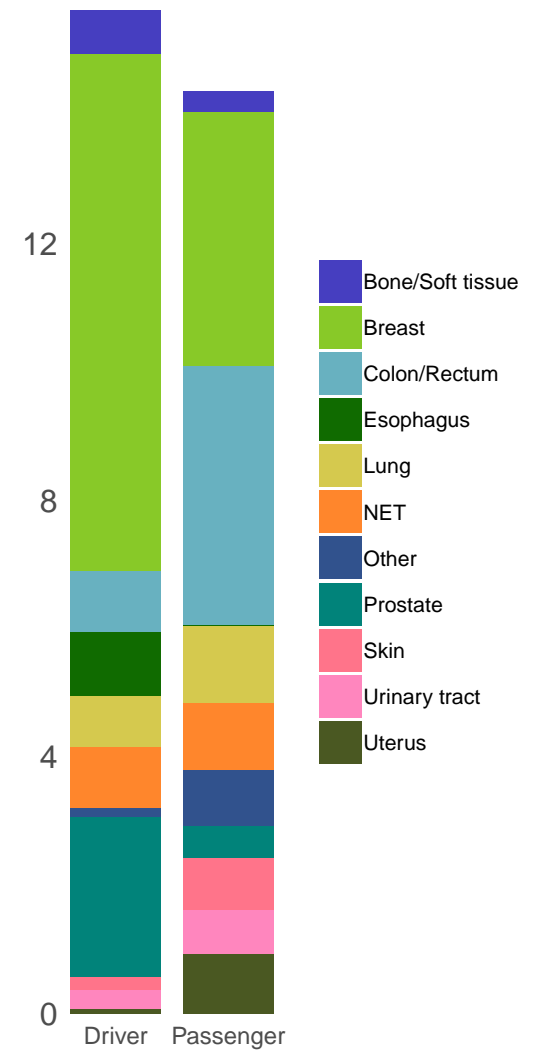

# PPP6C Variants

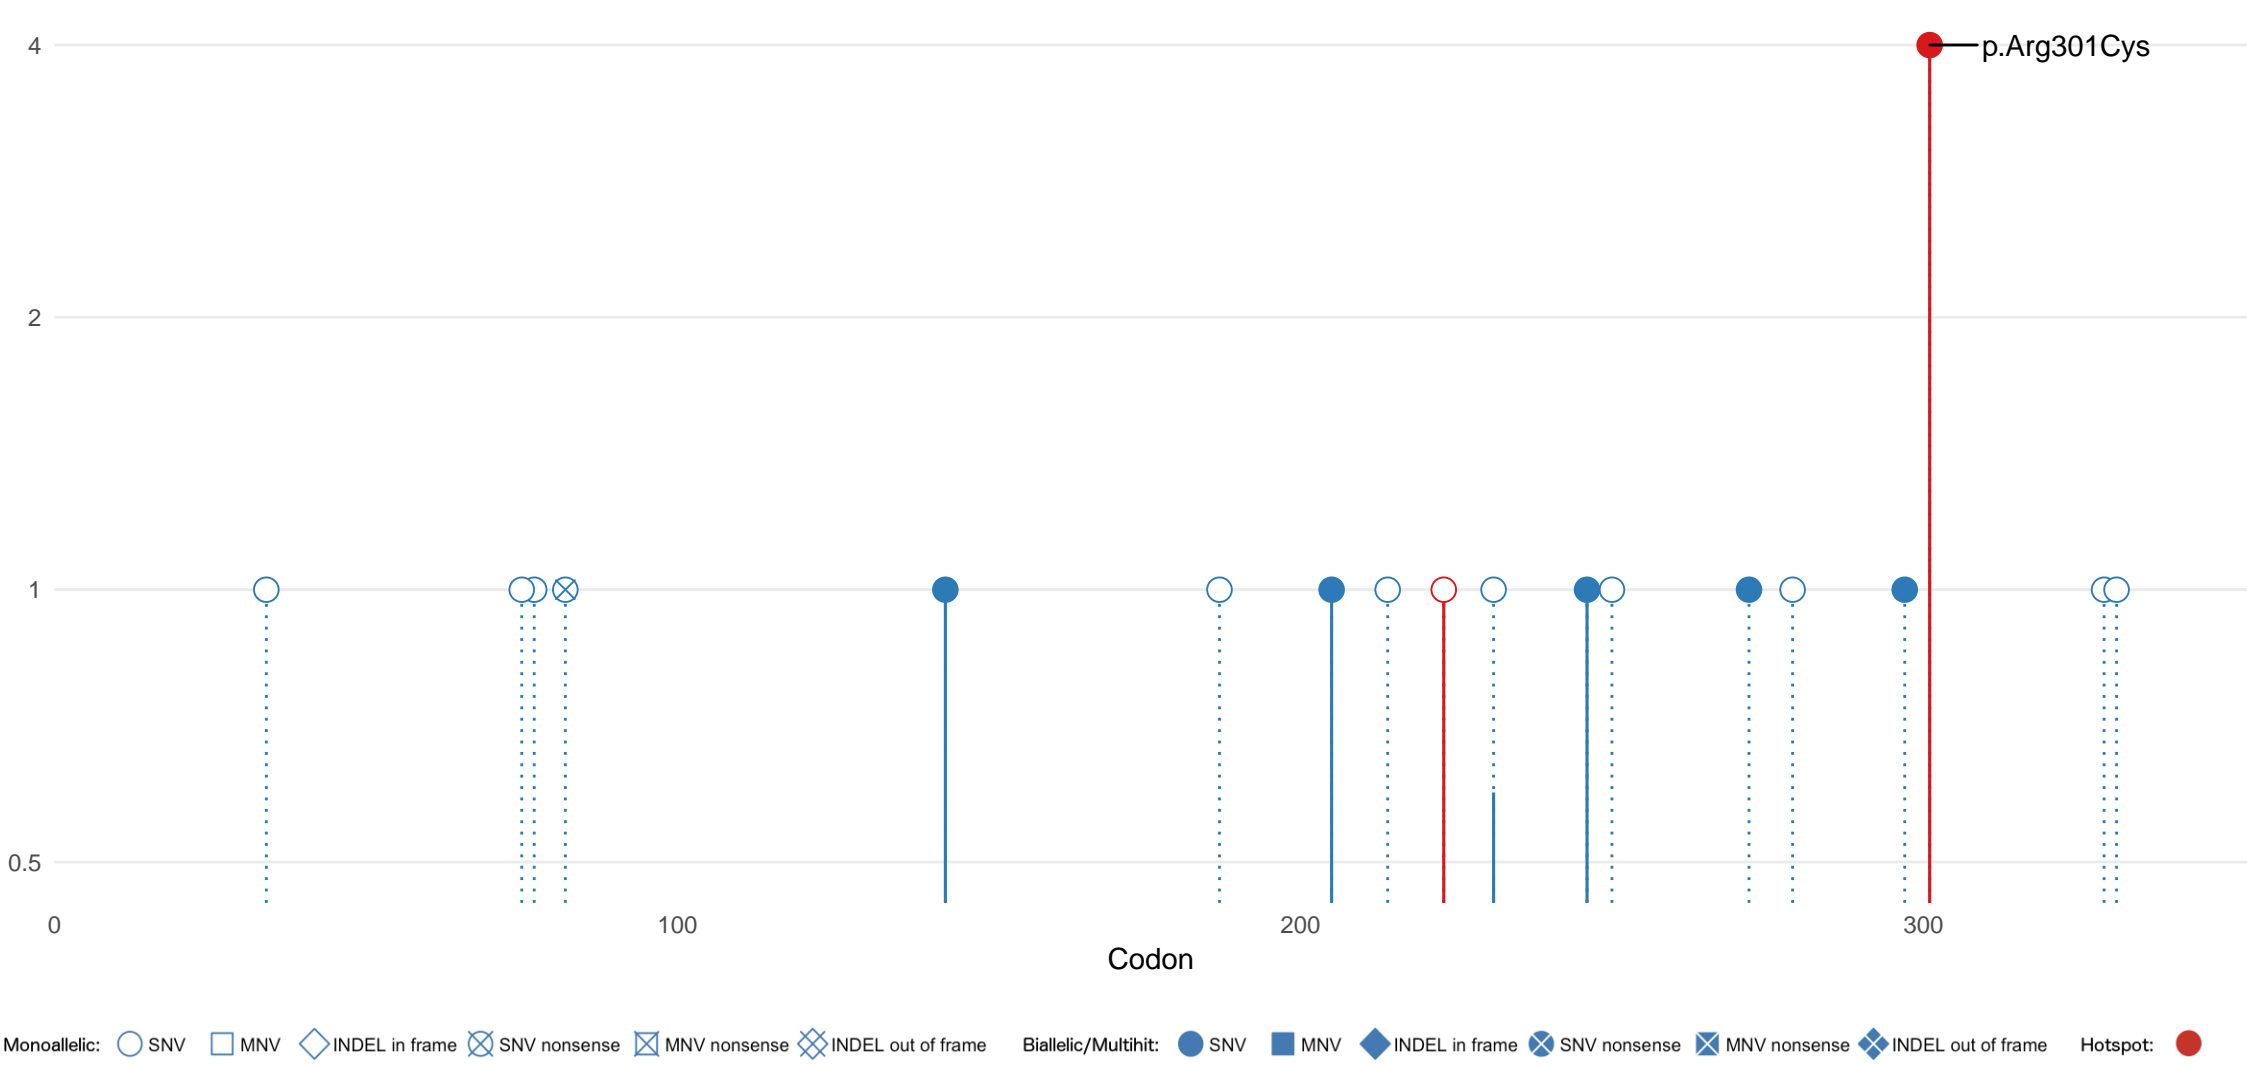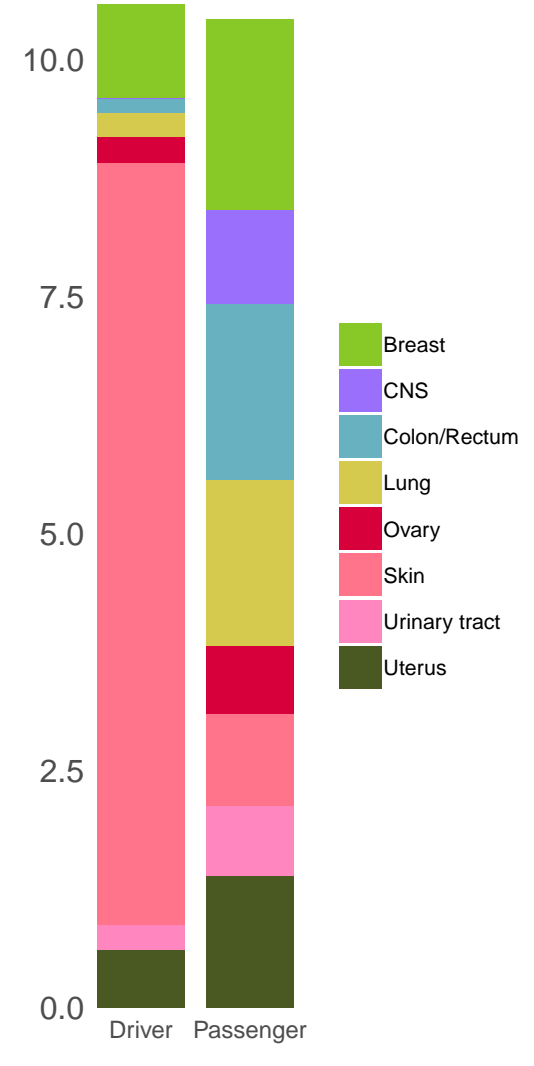

# PRDM1 Variants

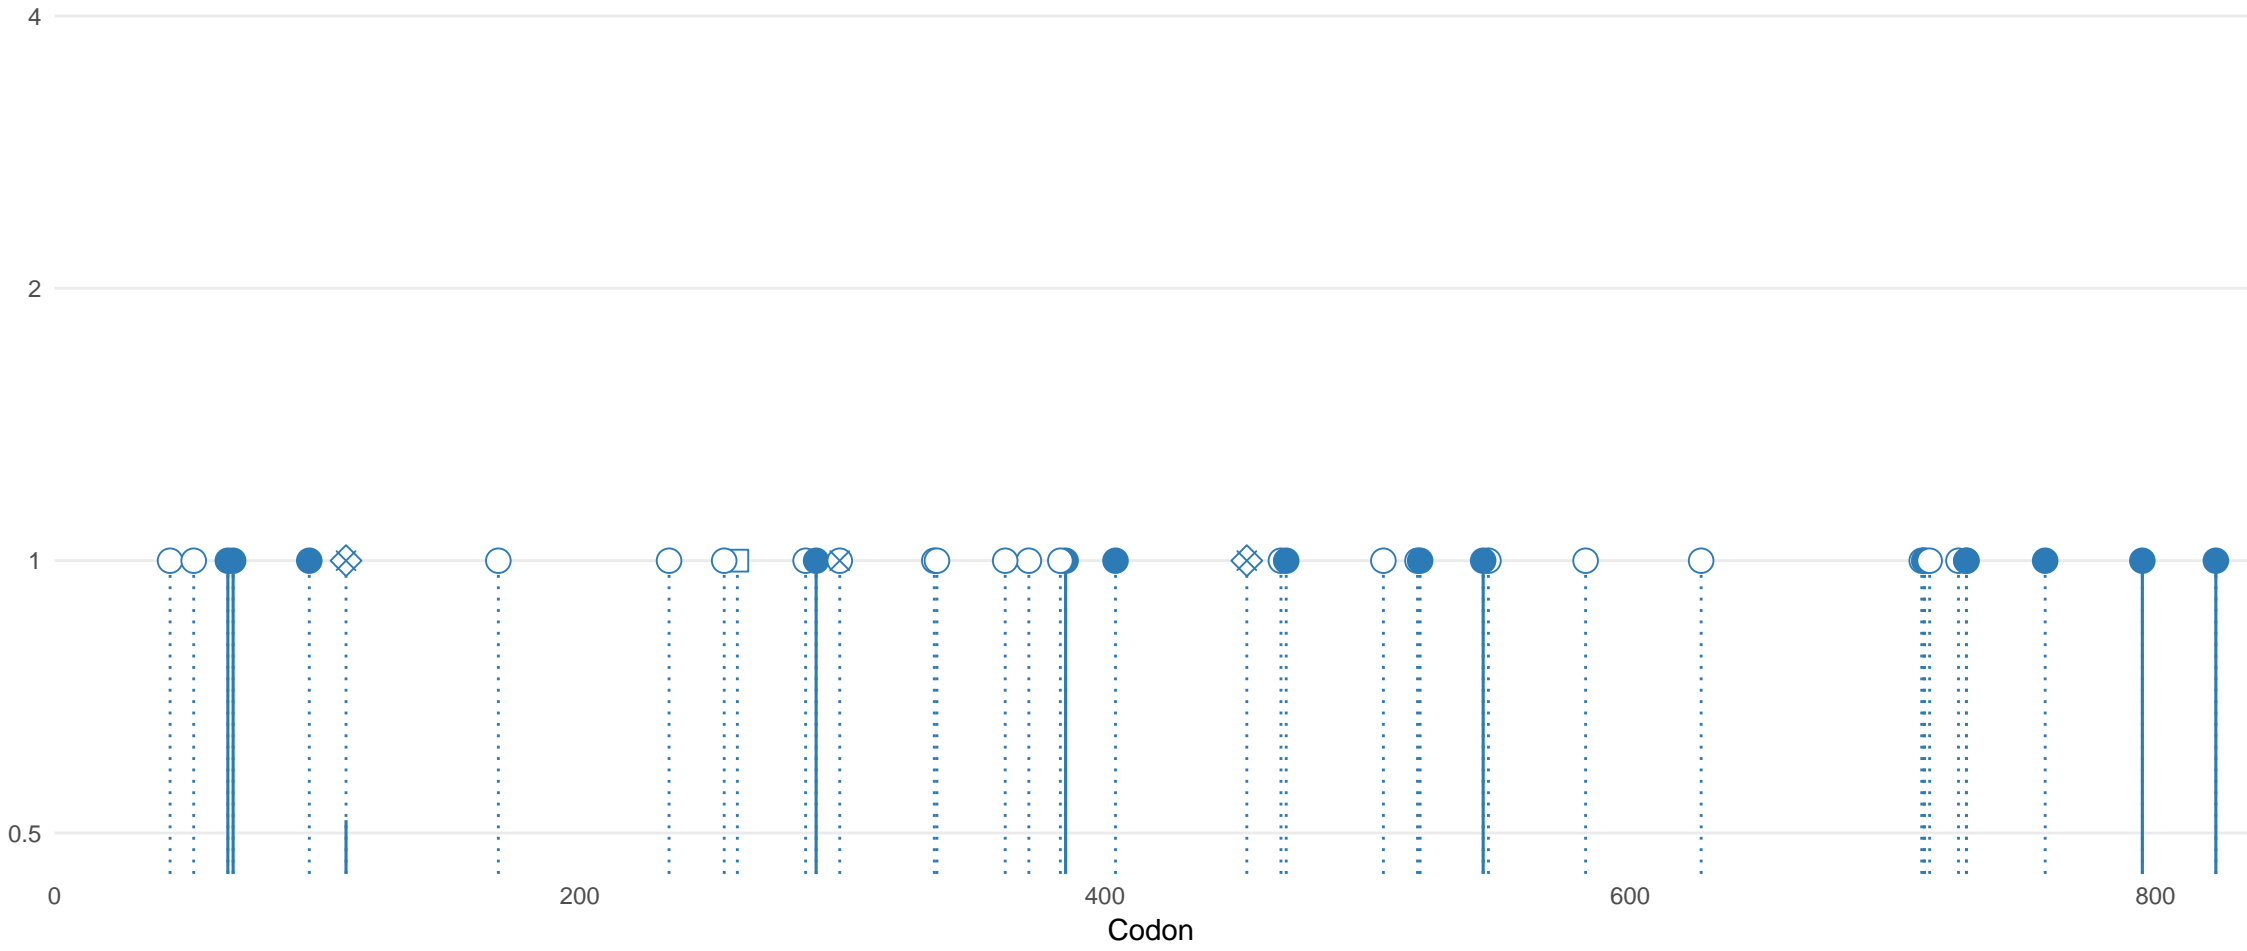

**Monoallelic:** ○ SNV □ MNV ◇ INDEL in frame ⊗ SNV nonsense ⊗ MNV nonsense ⊗ INDEL out of frame  
**Biallelic/Multihit:** ● SNV ■ MNV ◆ INDEL in frame ⊗ SNV nonsense ⊗ MNV nonsense ◆ INDEL out of frame  
**Hotspot:** ●

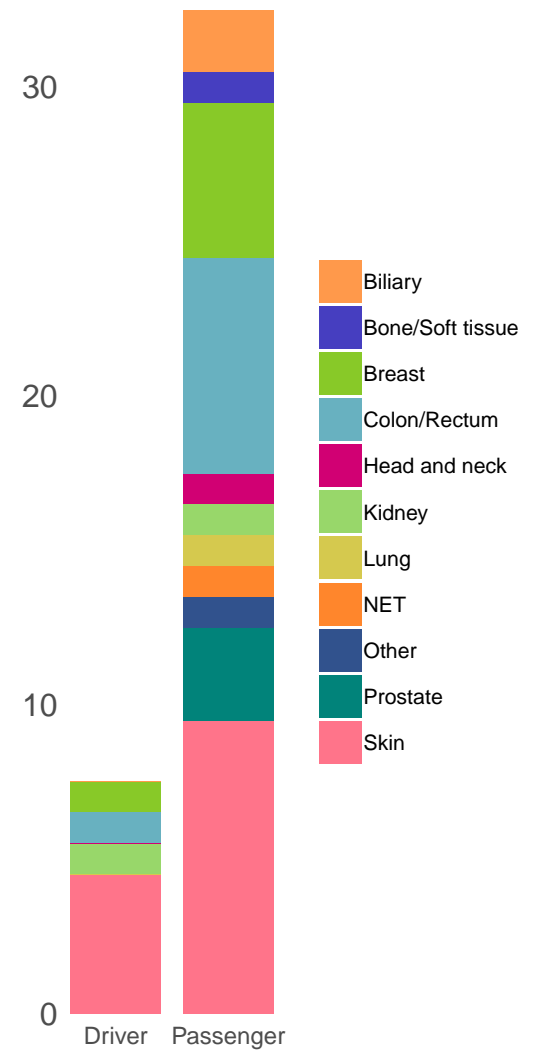

# PRKAR1A Variants

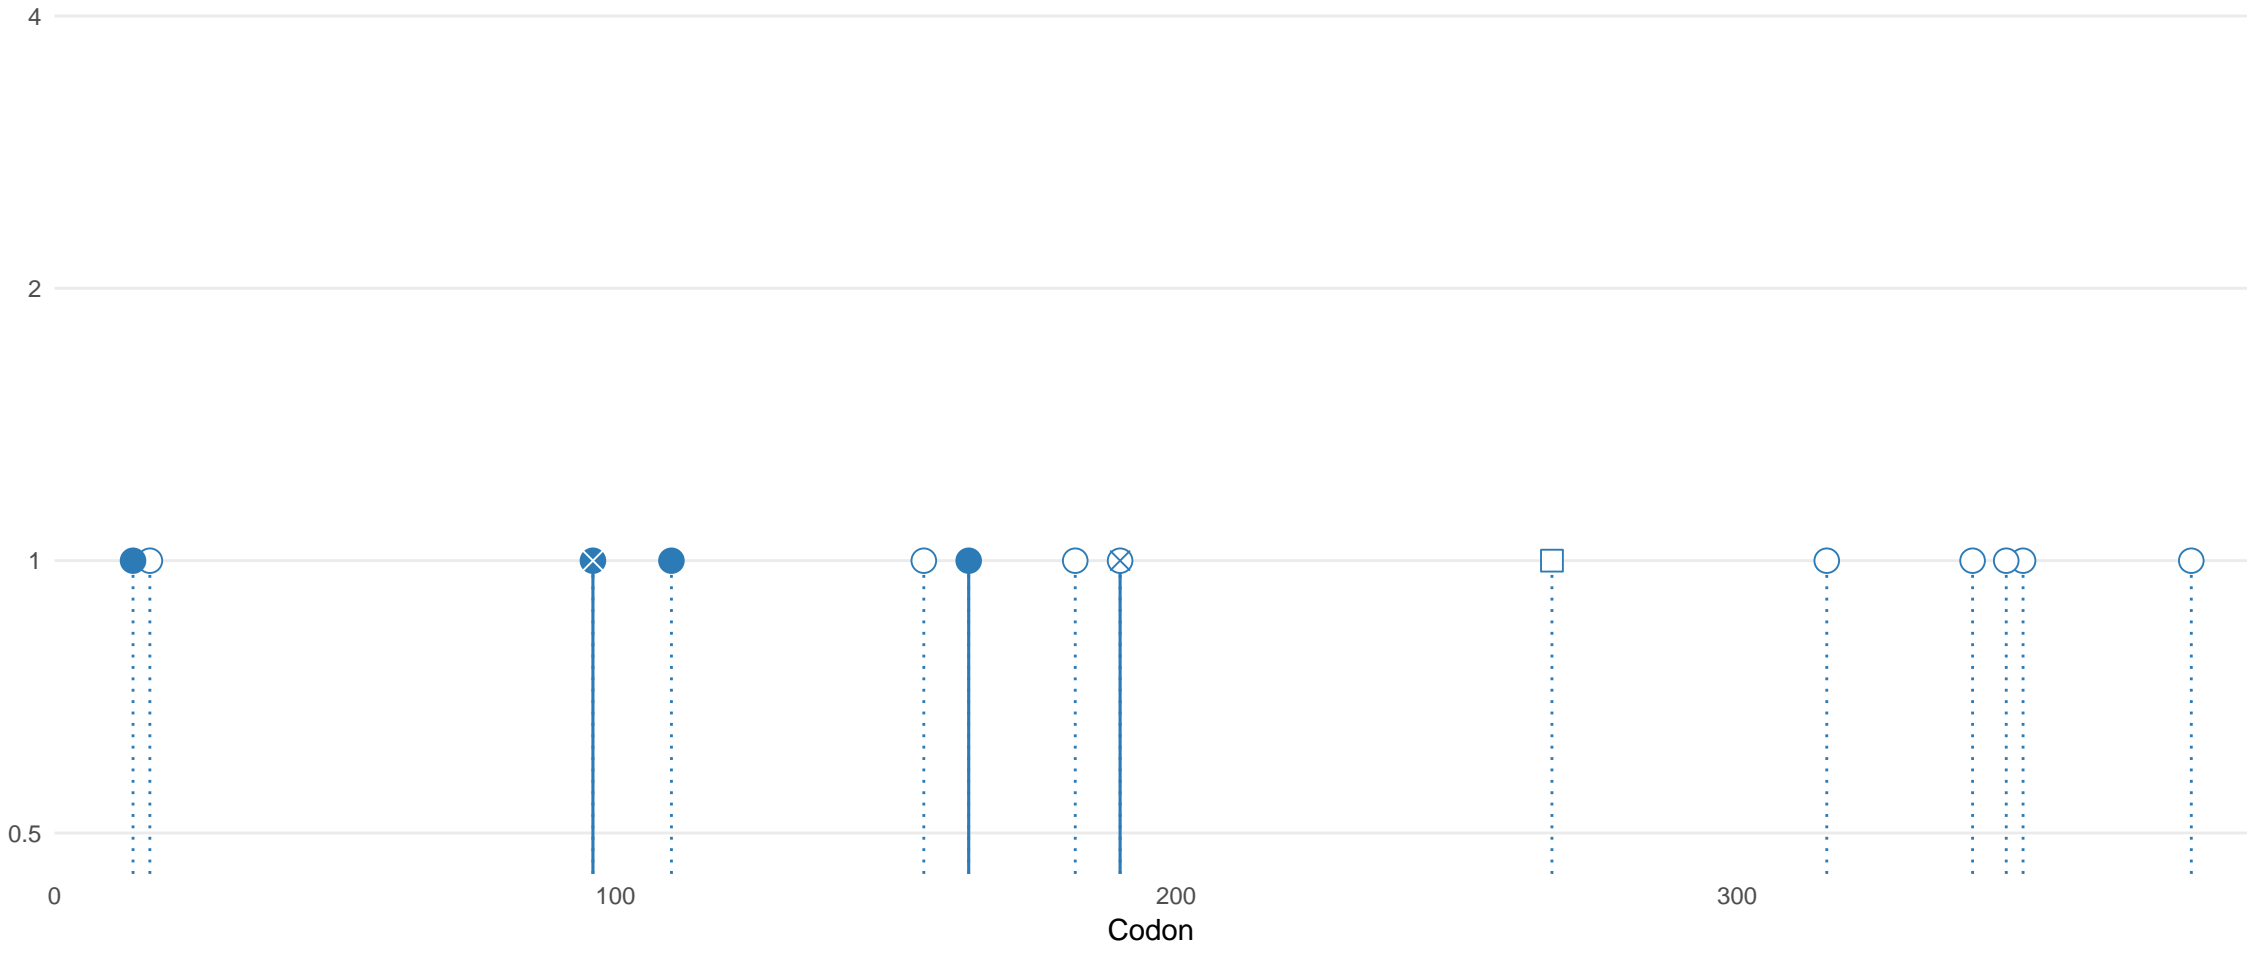

Monoallelic: ○ SNV □ MNV ◇ INDEL in frame ⊗ SNV nonsense ⊗ MNV nonsense ⊗ INDEL out of frame  
 Biallelic/Multihit: ● SNV ■ MNV ◆ INDEL in frame ⊗ SNV nonsense ⊗ MNV nonsense ◆ INDEL out of frame  
 Hotspot: ●

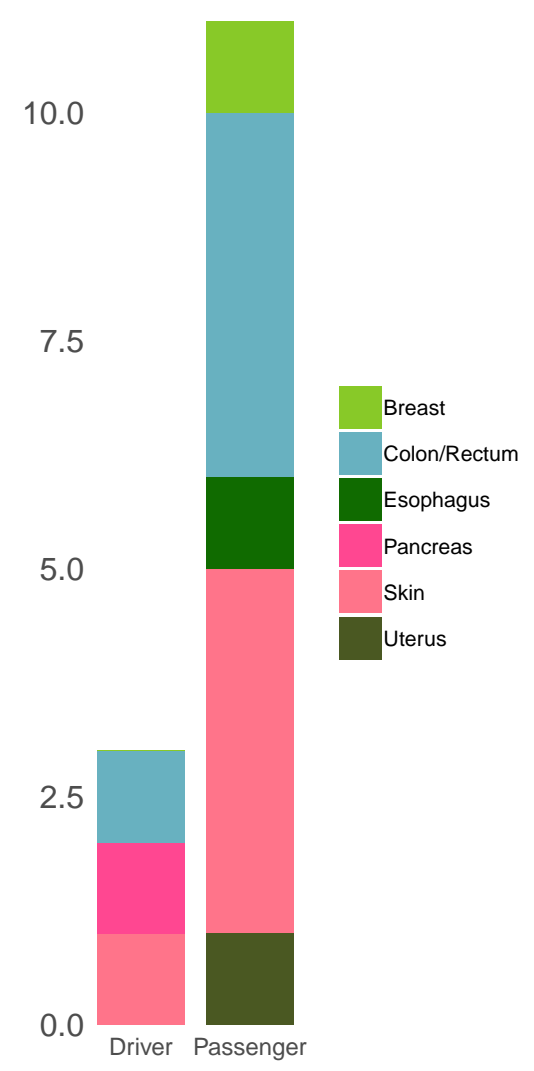

Breast  
 Colon/Rectum  
 Esophagus  
 Pancreas  
 Skin  
 Uterus

# PSIP1 Variants

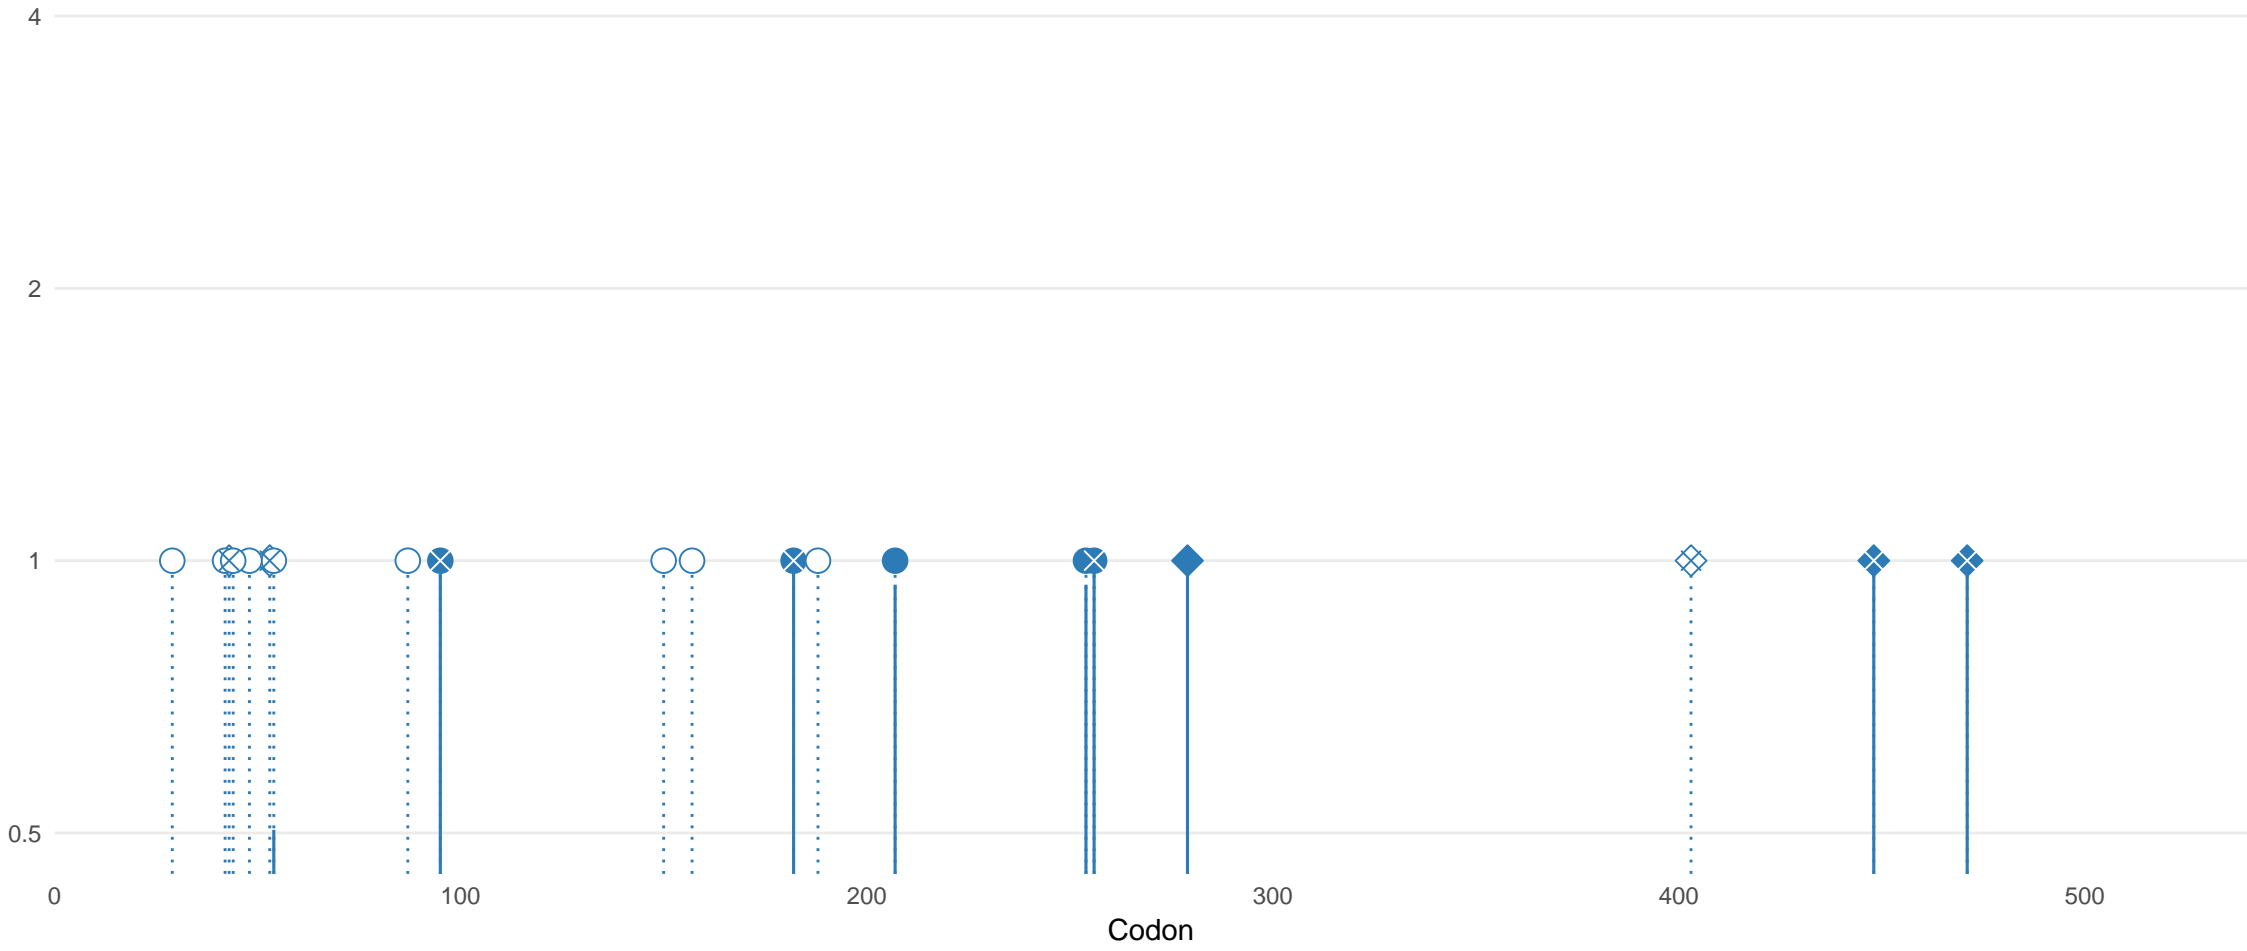

**Monoallelic:** ○ SNV □ MNV ◇ INDEL in frame ⊗ SNV nonsense ⊗ MNV nonsense ⊗ INDEL out of frame  
**Biallelic/Multihit:** ● SNV ■ MNV ◆ INDEL in frame ⊗ SNV nonsense ⊗ MNV nonsense ◆ INDEL out of frame  
**Hotspot:** ●

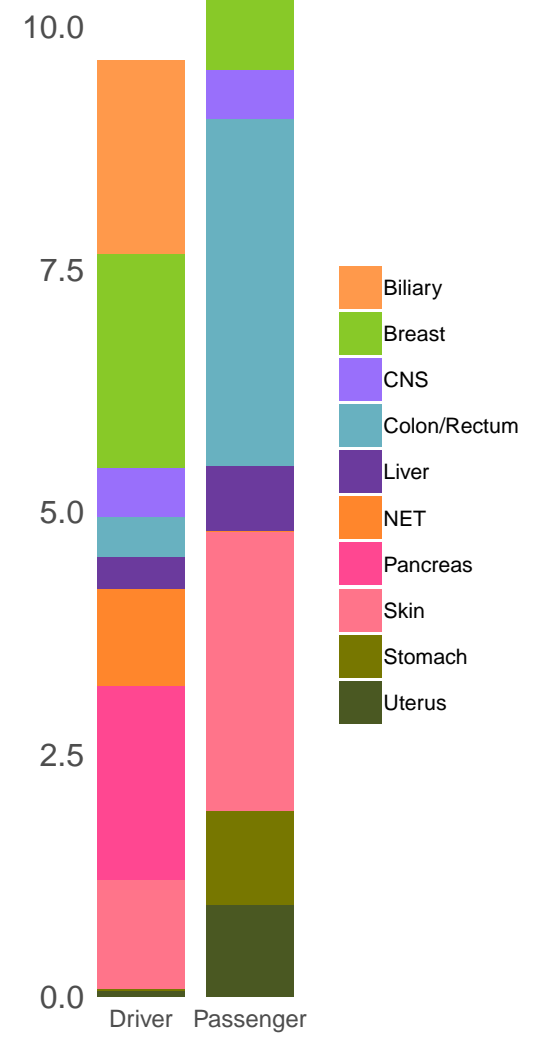

# PTCH1 Variants

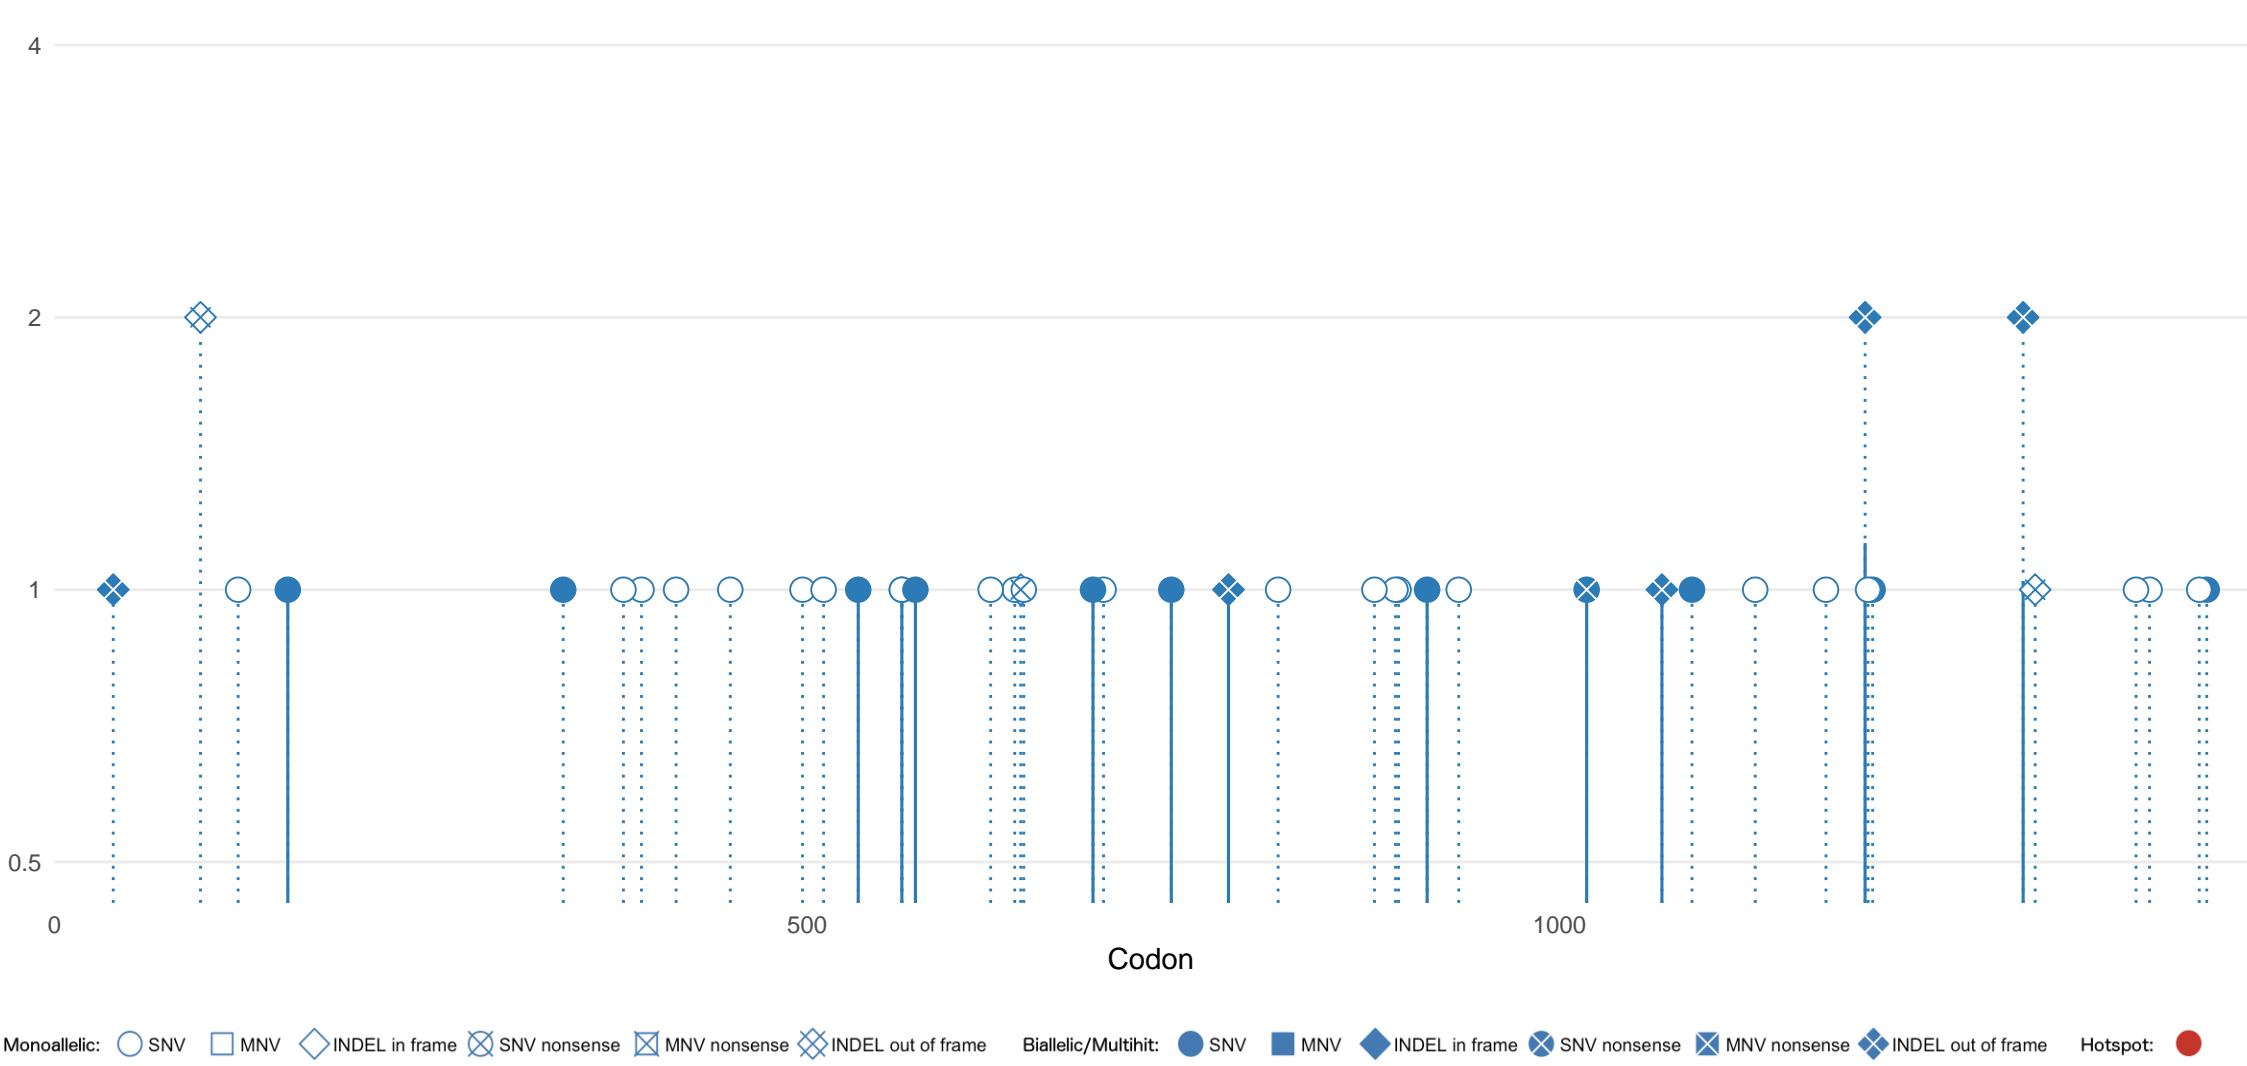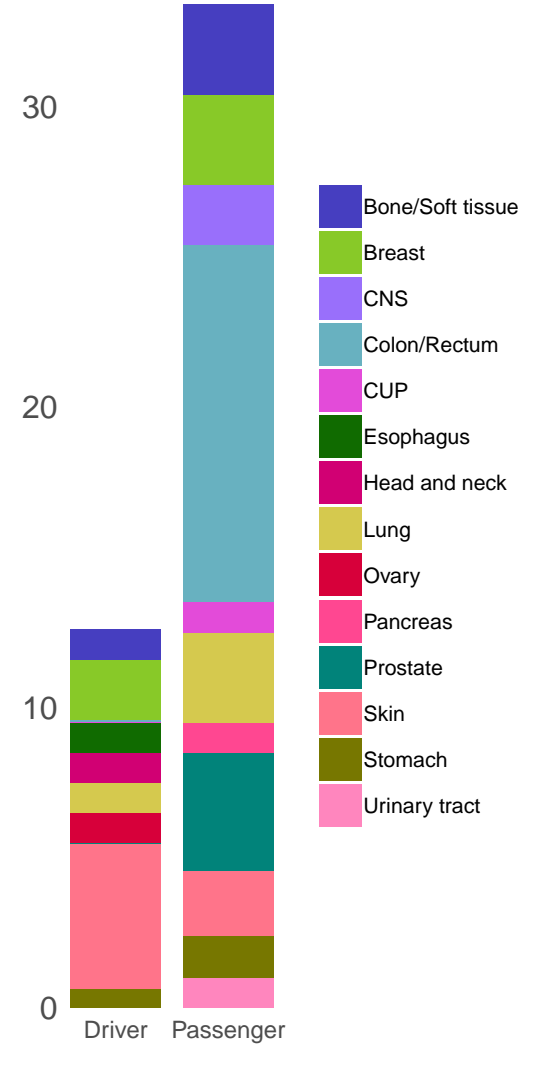



# PTEN Variants

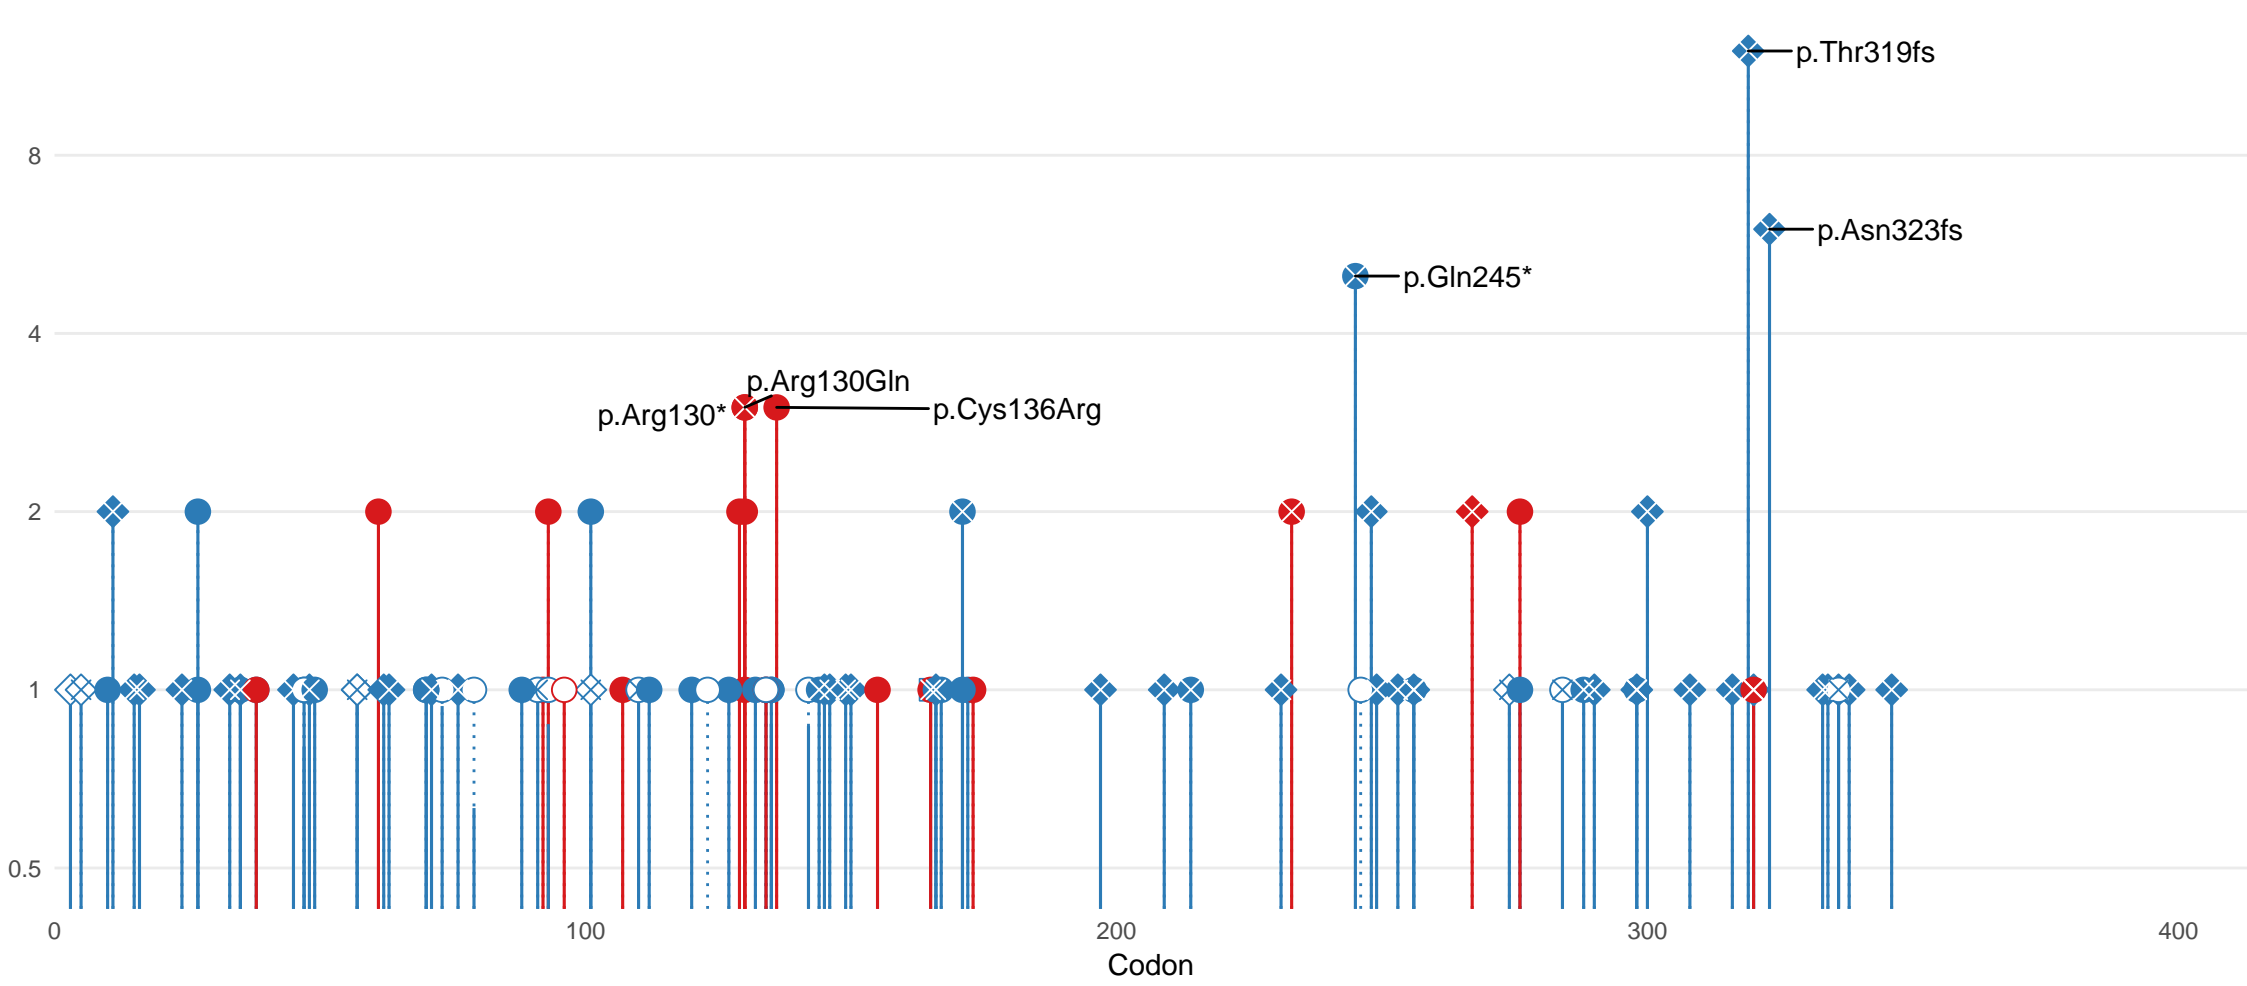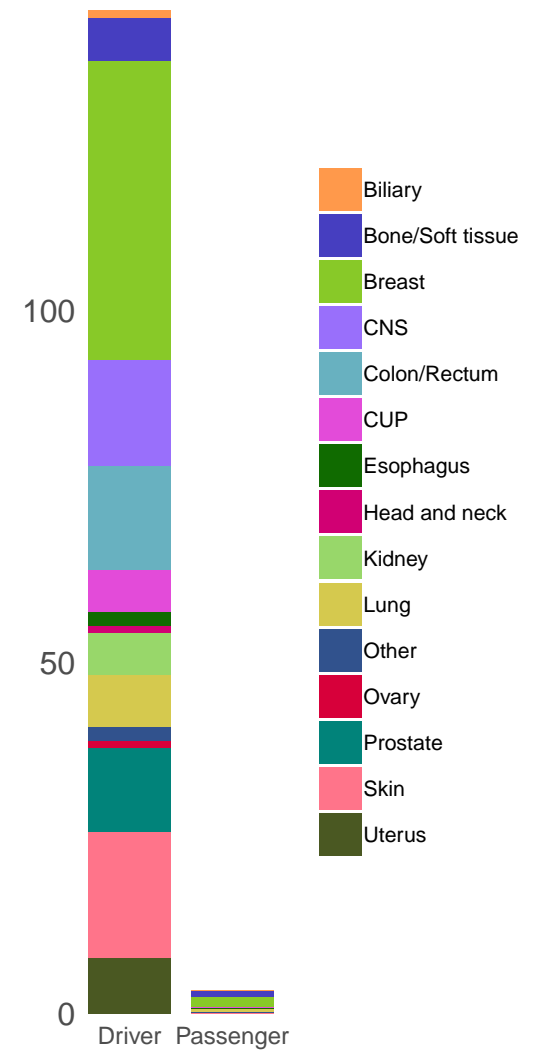

Monoallelic: ○ SNV □ MNV ◇ INDEL in frame ⊗ SNV nonsense ⊠ MNV nonsense ⊞ INDEL out of frame Biallelic/Multihit: ● SNV ■ MNV ◆ INDEL in frame ⊗ SNV nonsense ⊠ MNV nonsense ⊞ INDEL out of frame Hotspot: ● (Red)

# PTK6 Variants

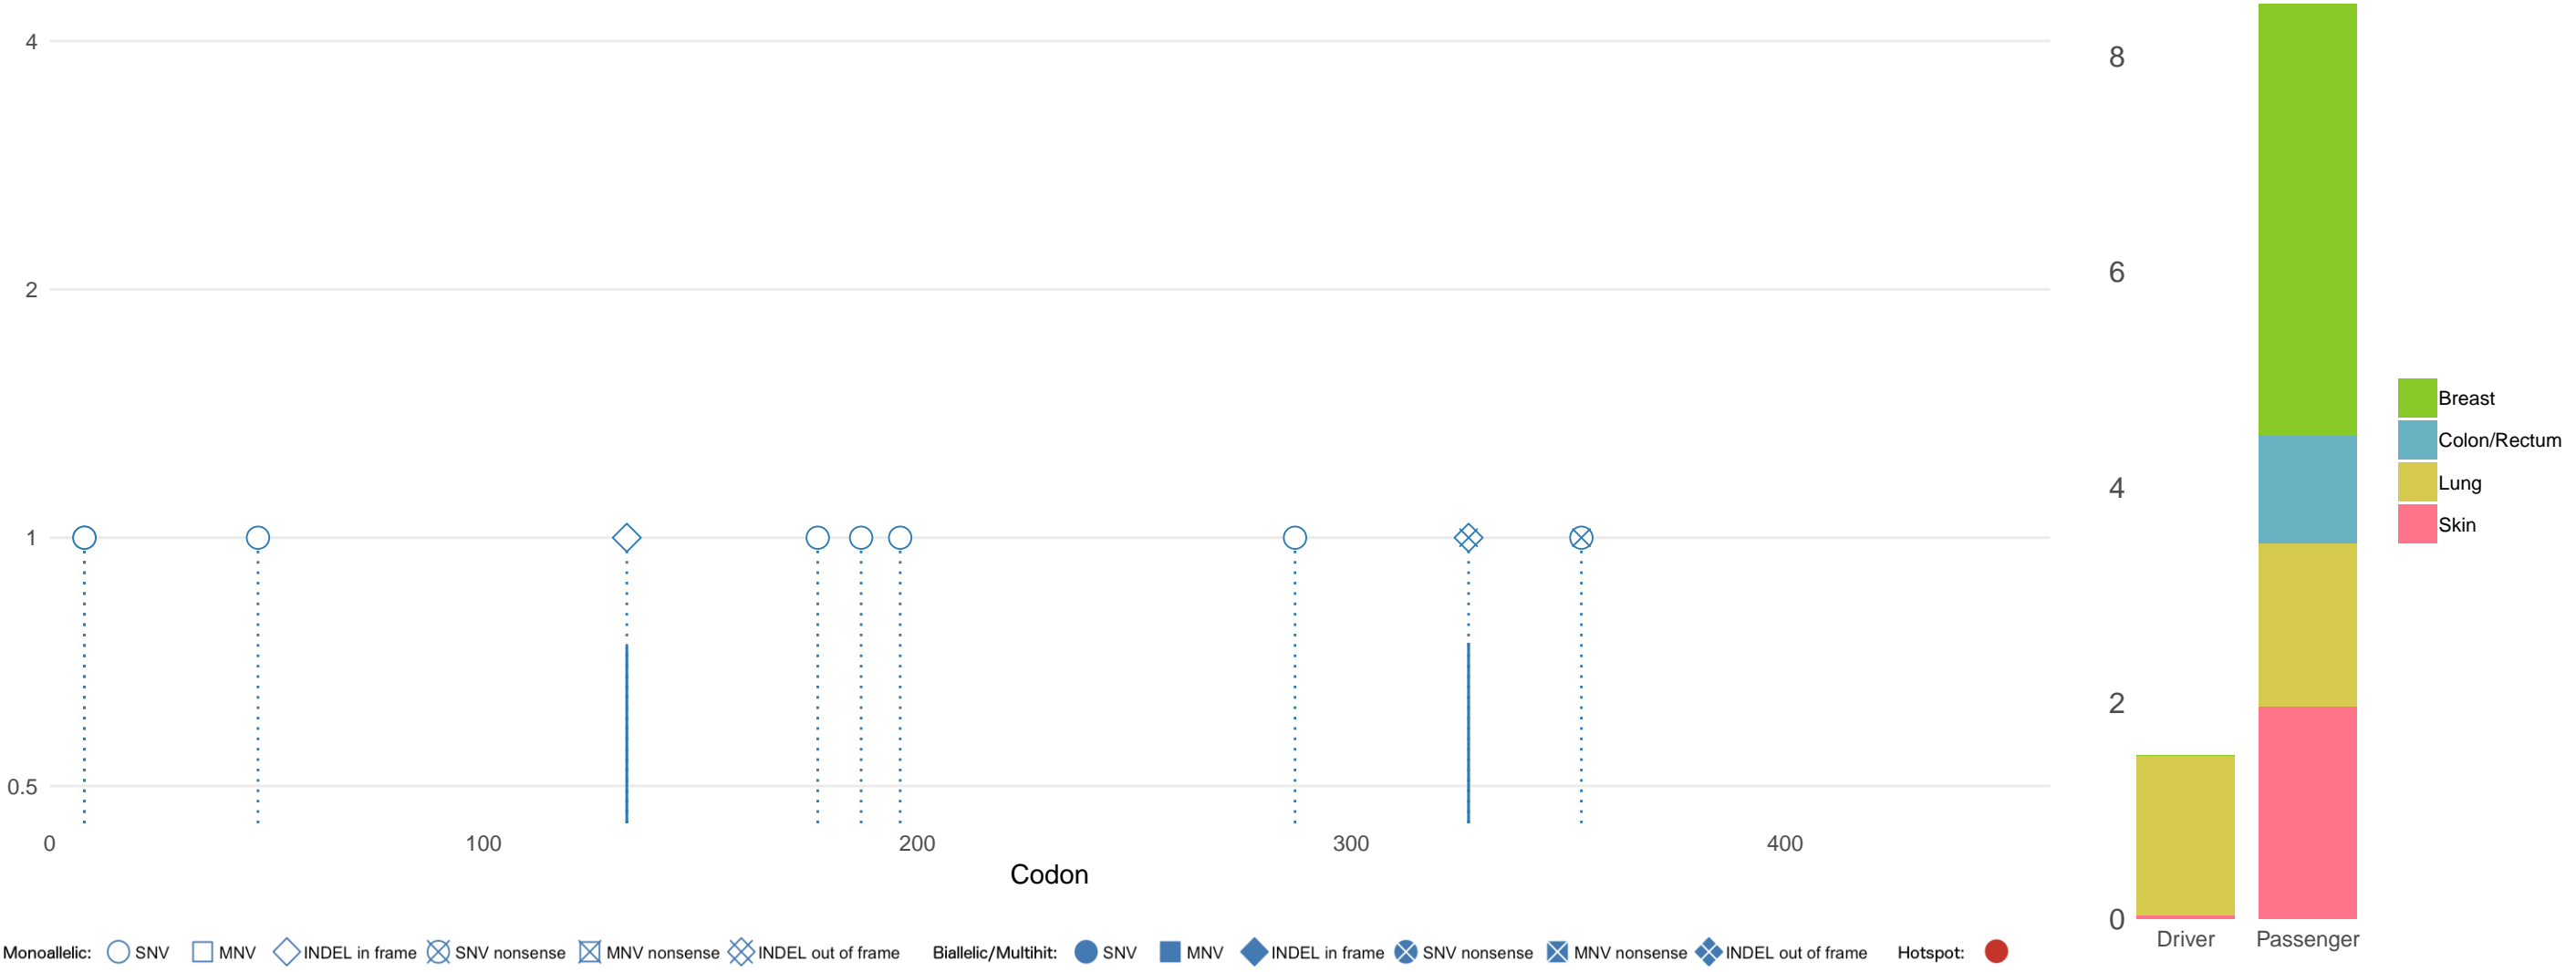

# PTPN13 Variants

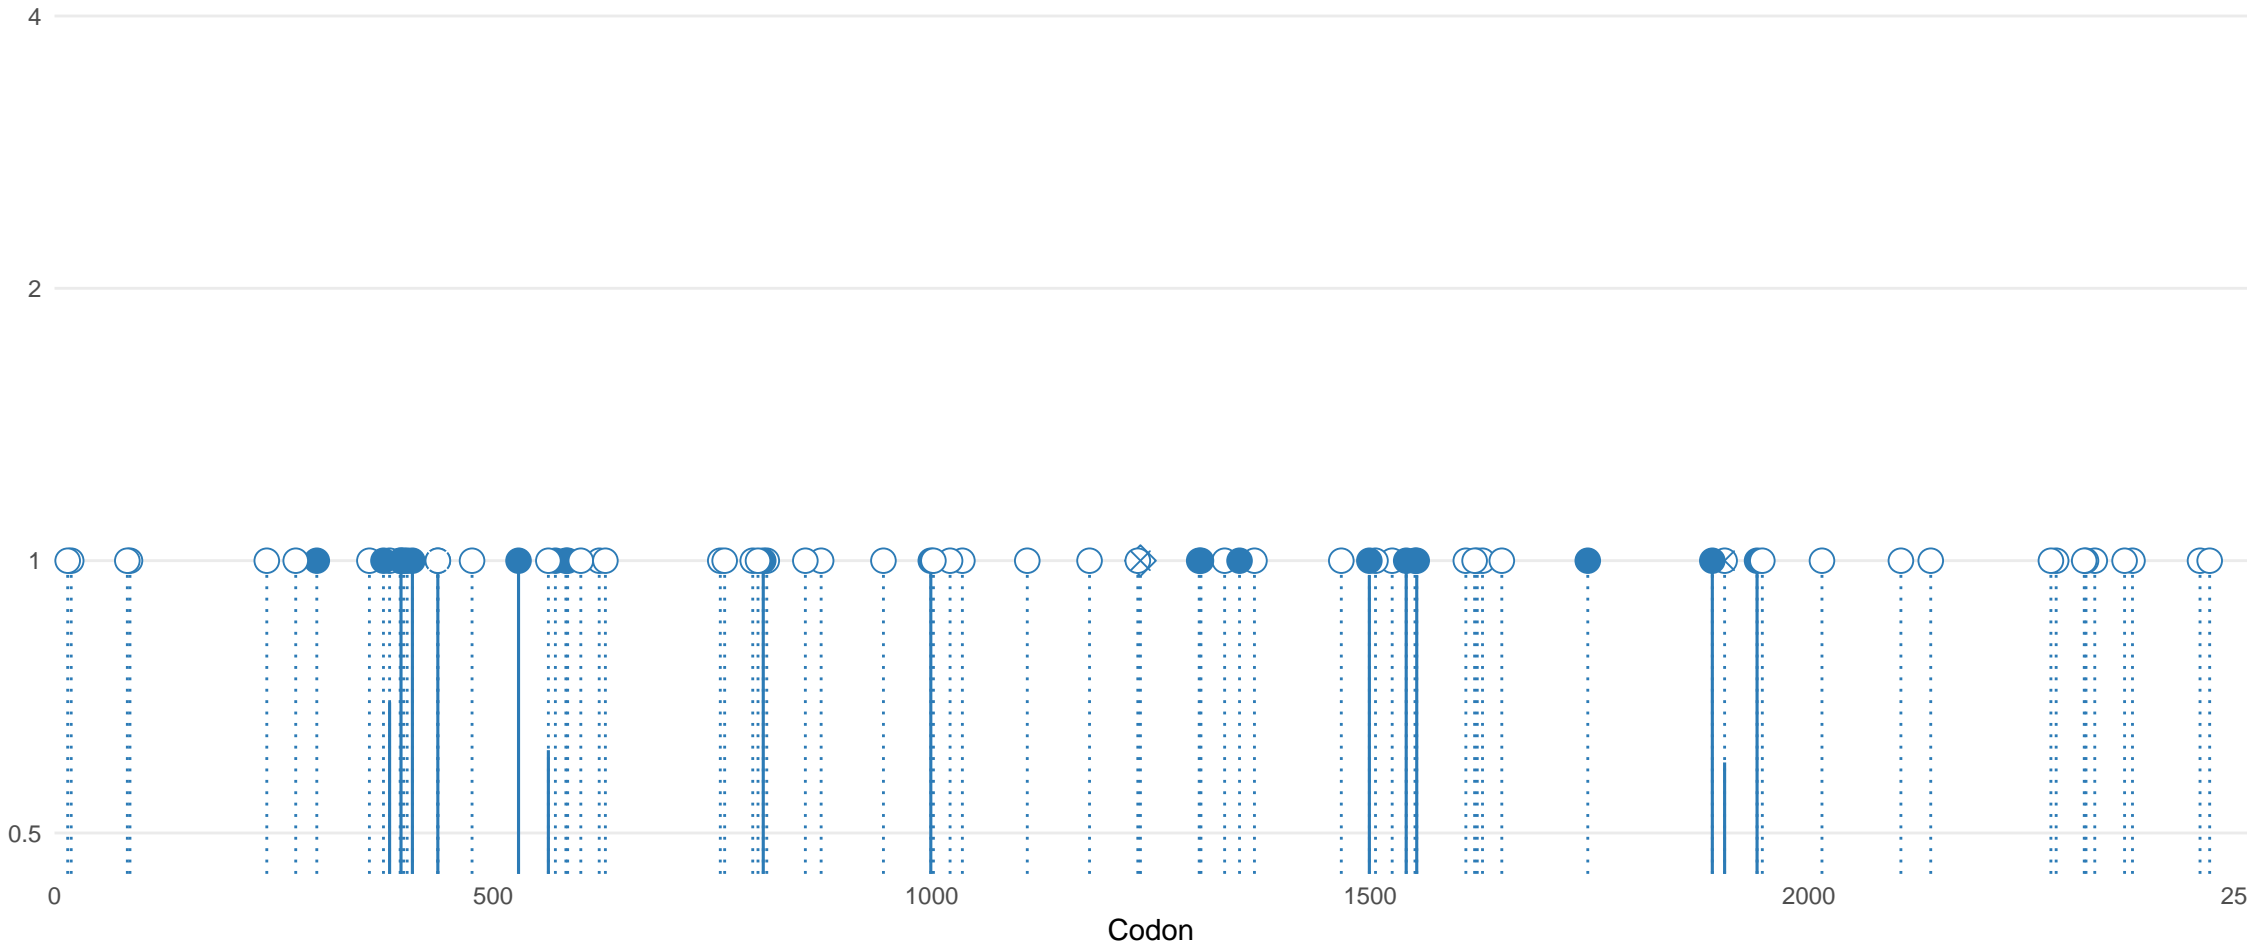

**Monoallelic:** ○ SNV □ MNV ◇ INDEL in frame ⊗ SNV nonsense ⊗ MNV nonsense ⊗ INDEL out of frame  
**Biallelic/Multihit:** ● SNV ■ MNV ◆ INDEL in frame ⊗ SNV nonsense ⊗ MNV nonsense ⊗ INDEL out of frame  
**Hotspot:** ●

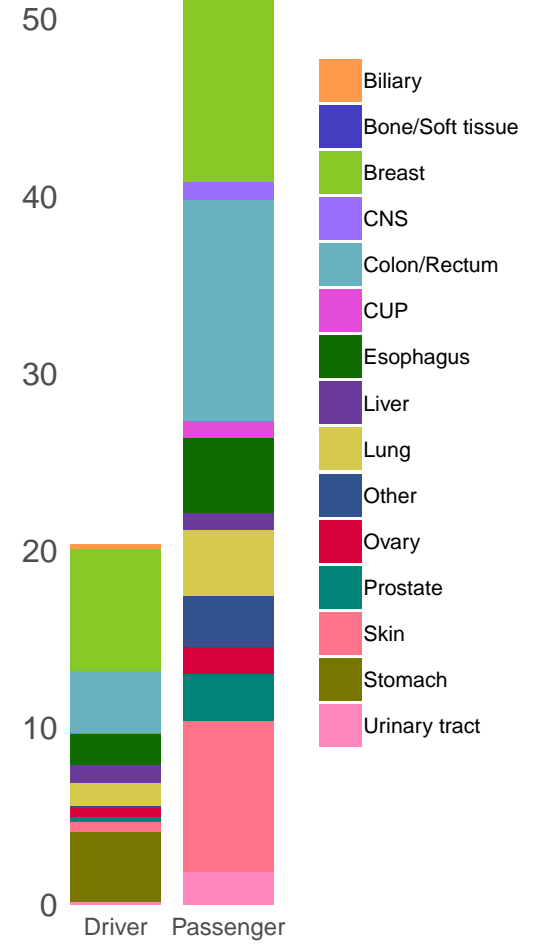

# PTPRB Variants

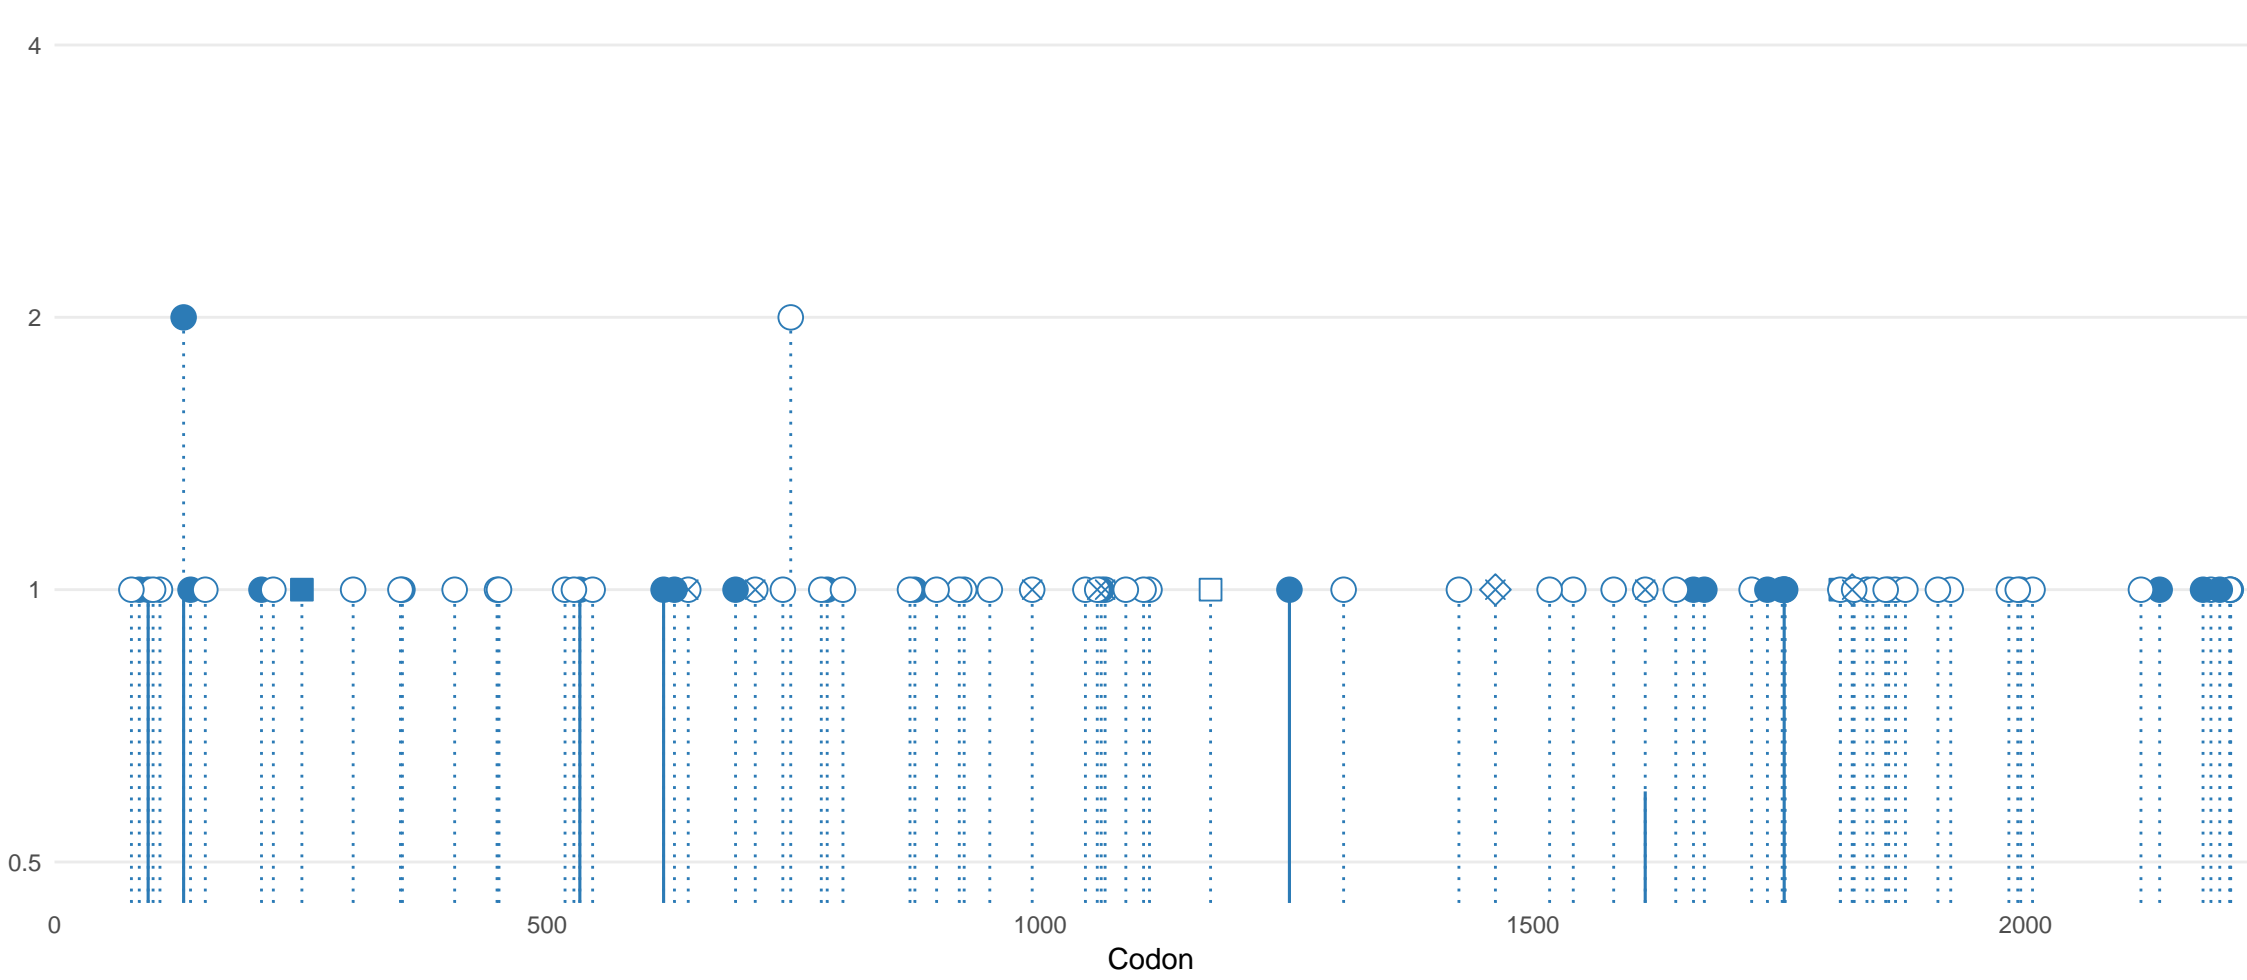

**Monoallelic:** ○ SNV □ MNV ◇ INDEL in frame ⊗ SNV nonsense ⊗ MNV nonsense ⊗ INDEL out of frame  
**Biallelic/Multihit:** ● SNV ■ MNV ◆ INDEL in frame ⊗ SNV nonsense ⊗ MNV nonsense ⊗ INDEL out of frame  
**Hotspot:** ●

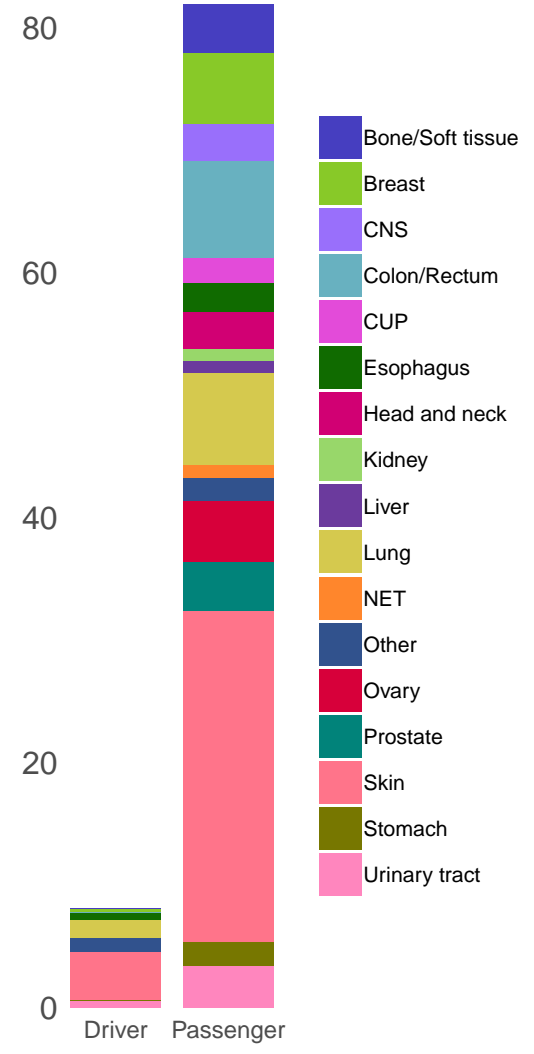

# RACGAP1 Variants

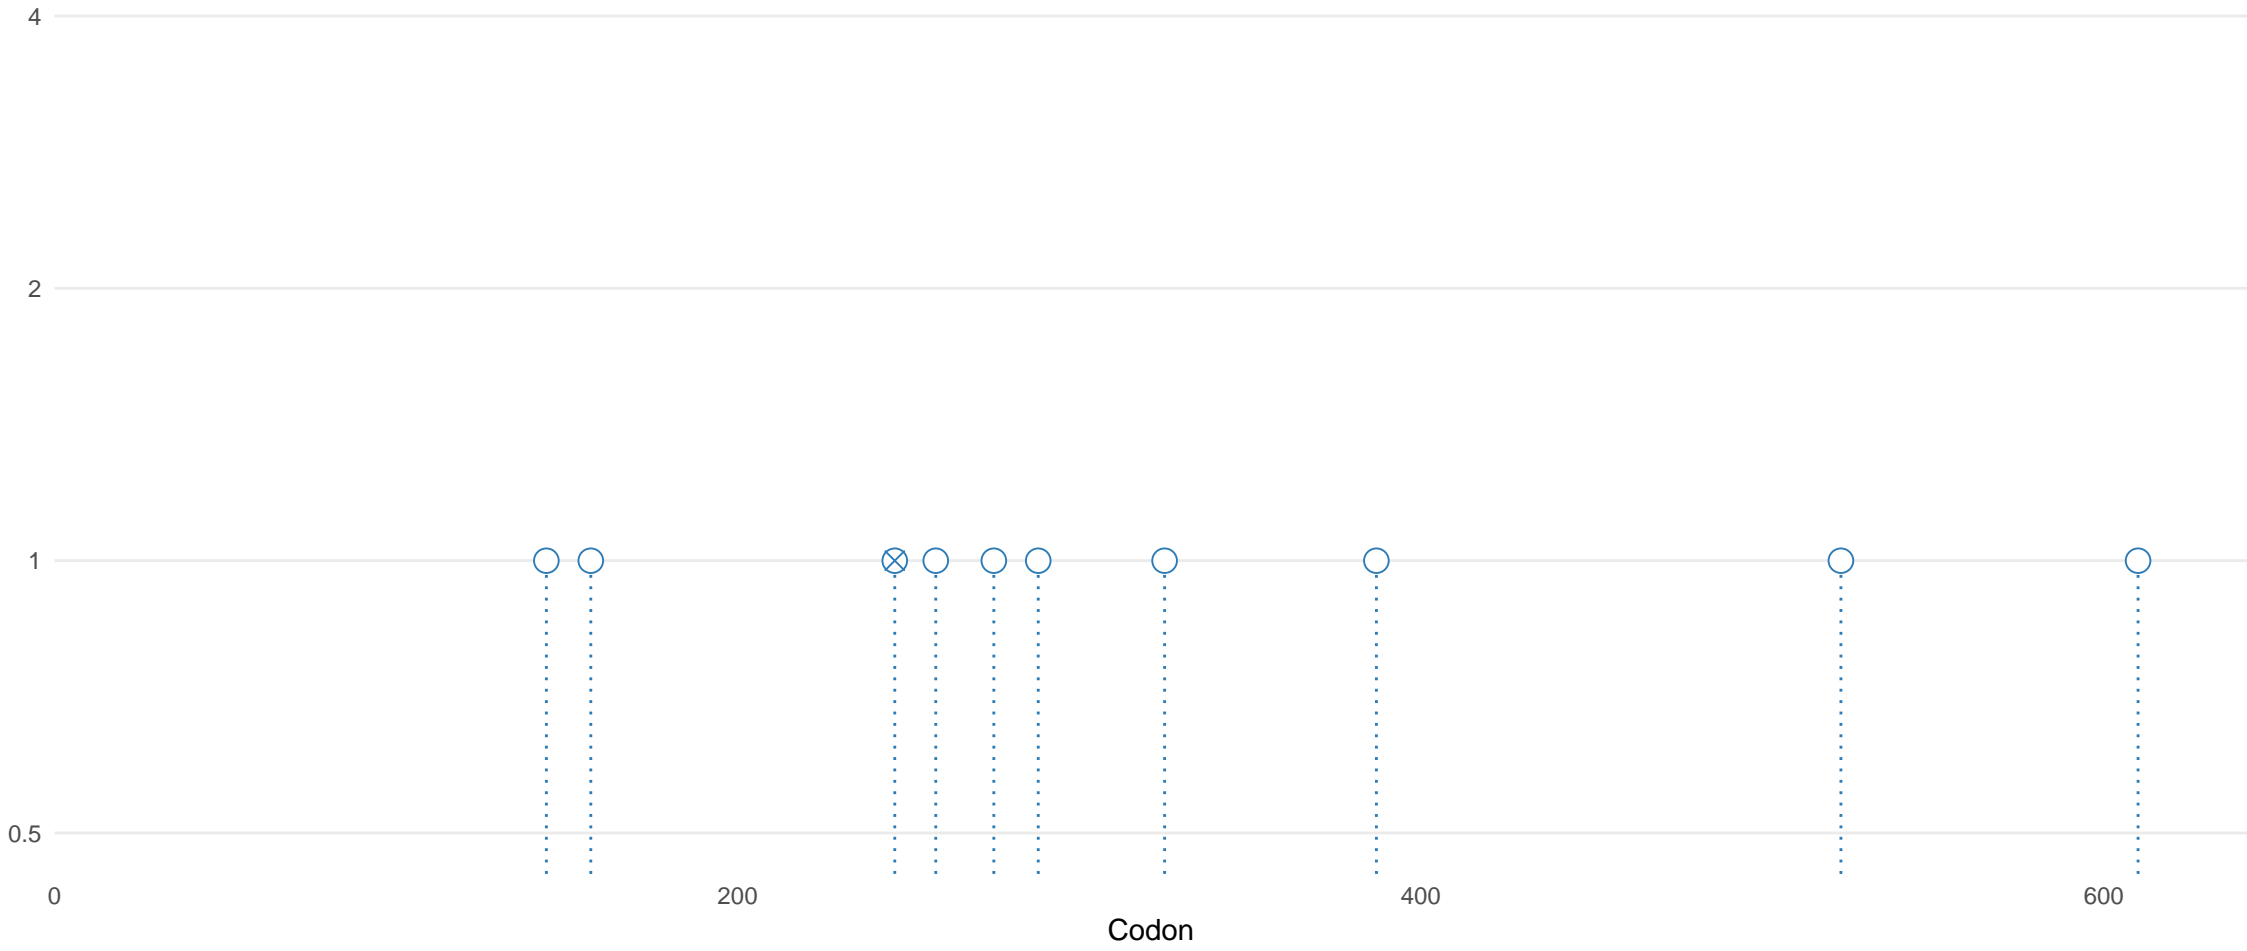

Monoallelic: ○ SNV □ MNV ◇ INDEL in frame ⊗ SNV nonsense ⊠ MNV nonsense ⊞ INDEL out of frame  
 Biallelic/Multihit: ● SNV ■ MNV ◆ INDEL in frame ⊗ SNV nonsense ⊠ MNV nonsense ⊞ INDEL out of frame  
 Hotspot: ●

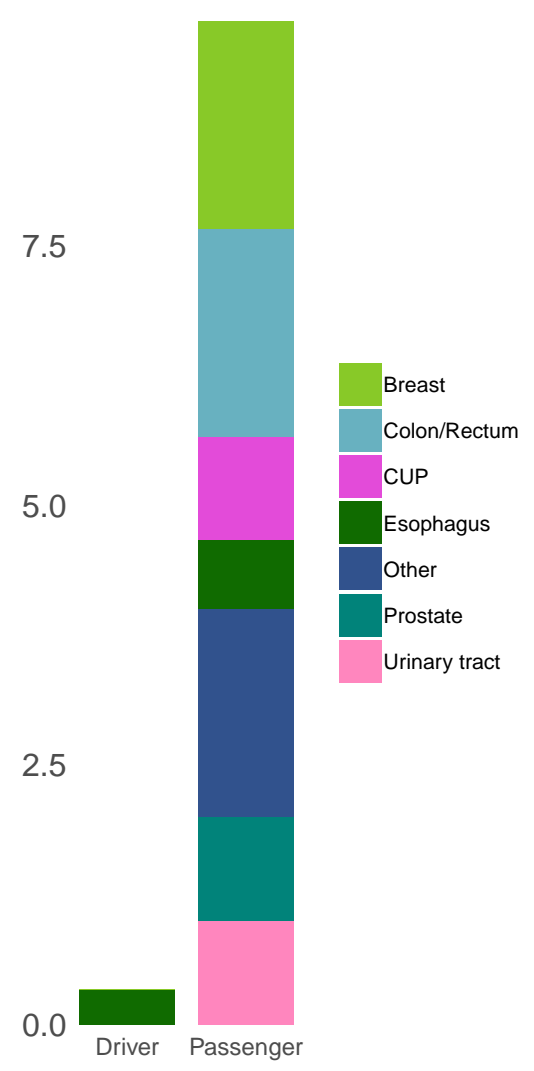

# RARG Variants

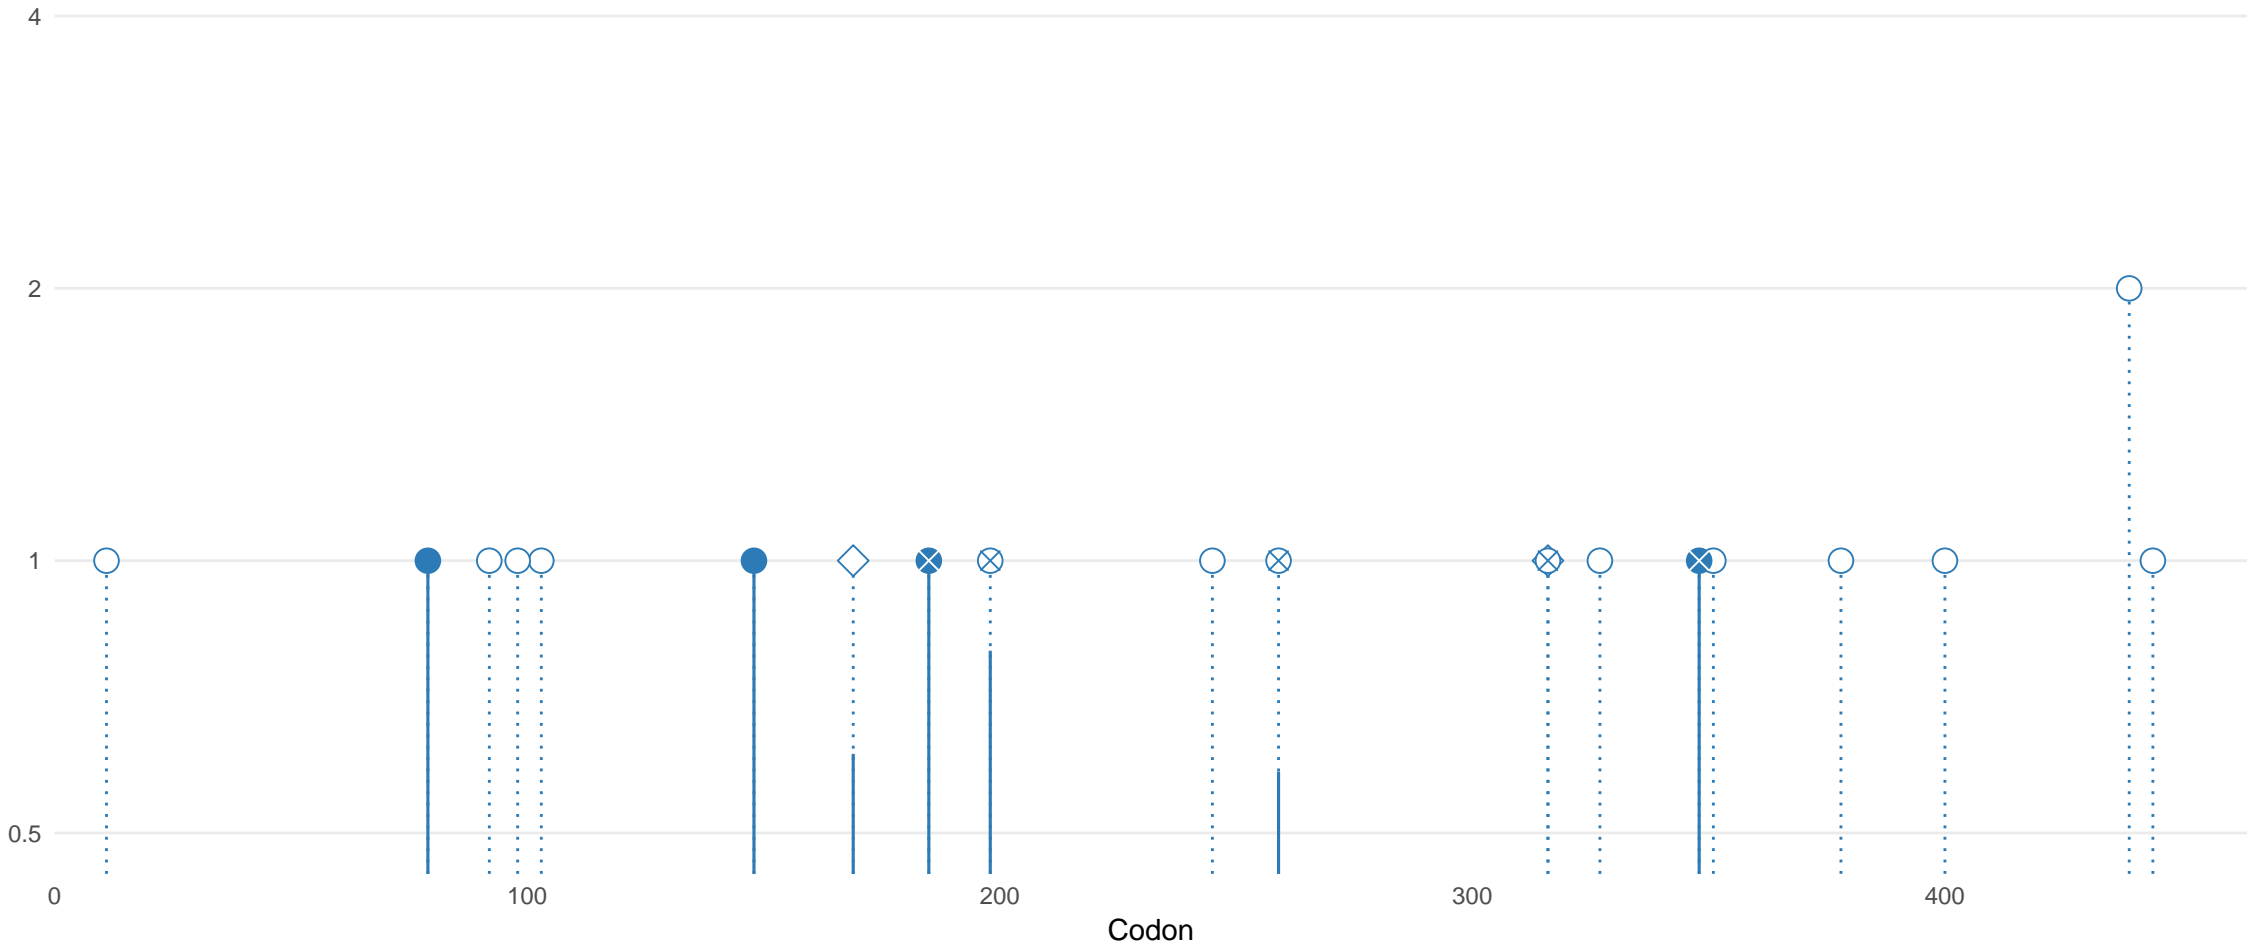

**Monoallelic:** ○ SNV □ MNV ◇ INDEL in frame ⊗ SNV nonsense ⊗ MNV nonsense ⊗ INDEL out of frame  
**Biallelic/Multihit:** ● SNV ■ MNV ◆ INDEL in frame ⊗ SNV nonsense ⊗ MNV nonsense ◆ INDEL out of frame  
**Hotspot:** ●

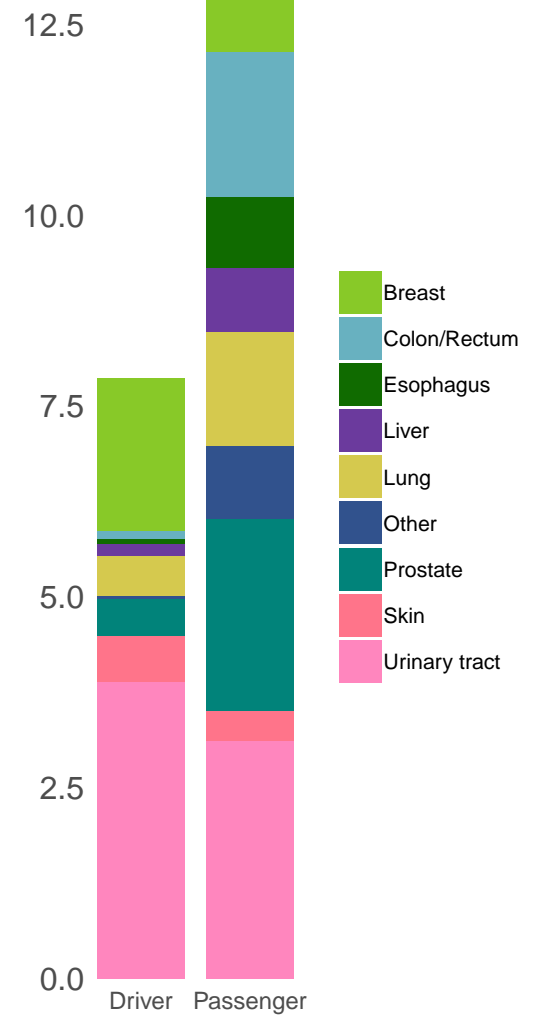

# RASA1 Variants

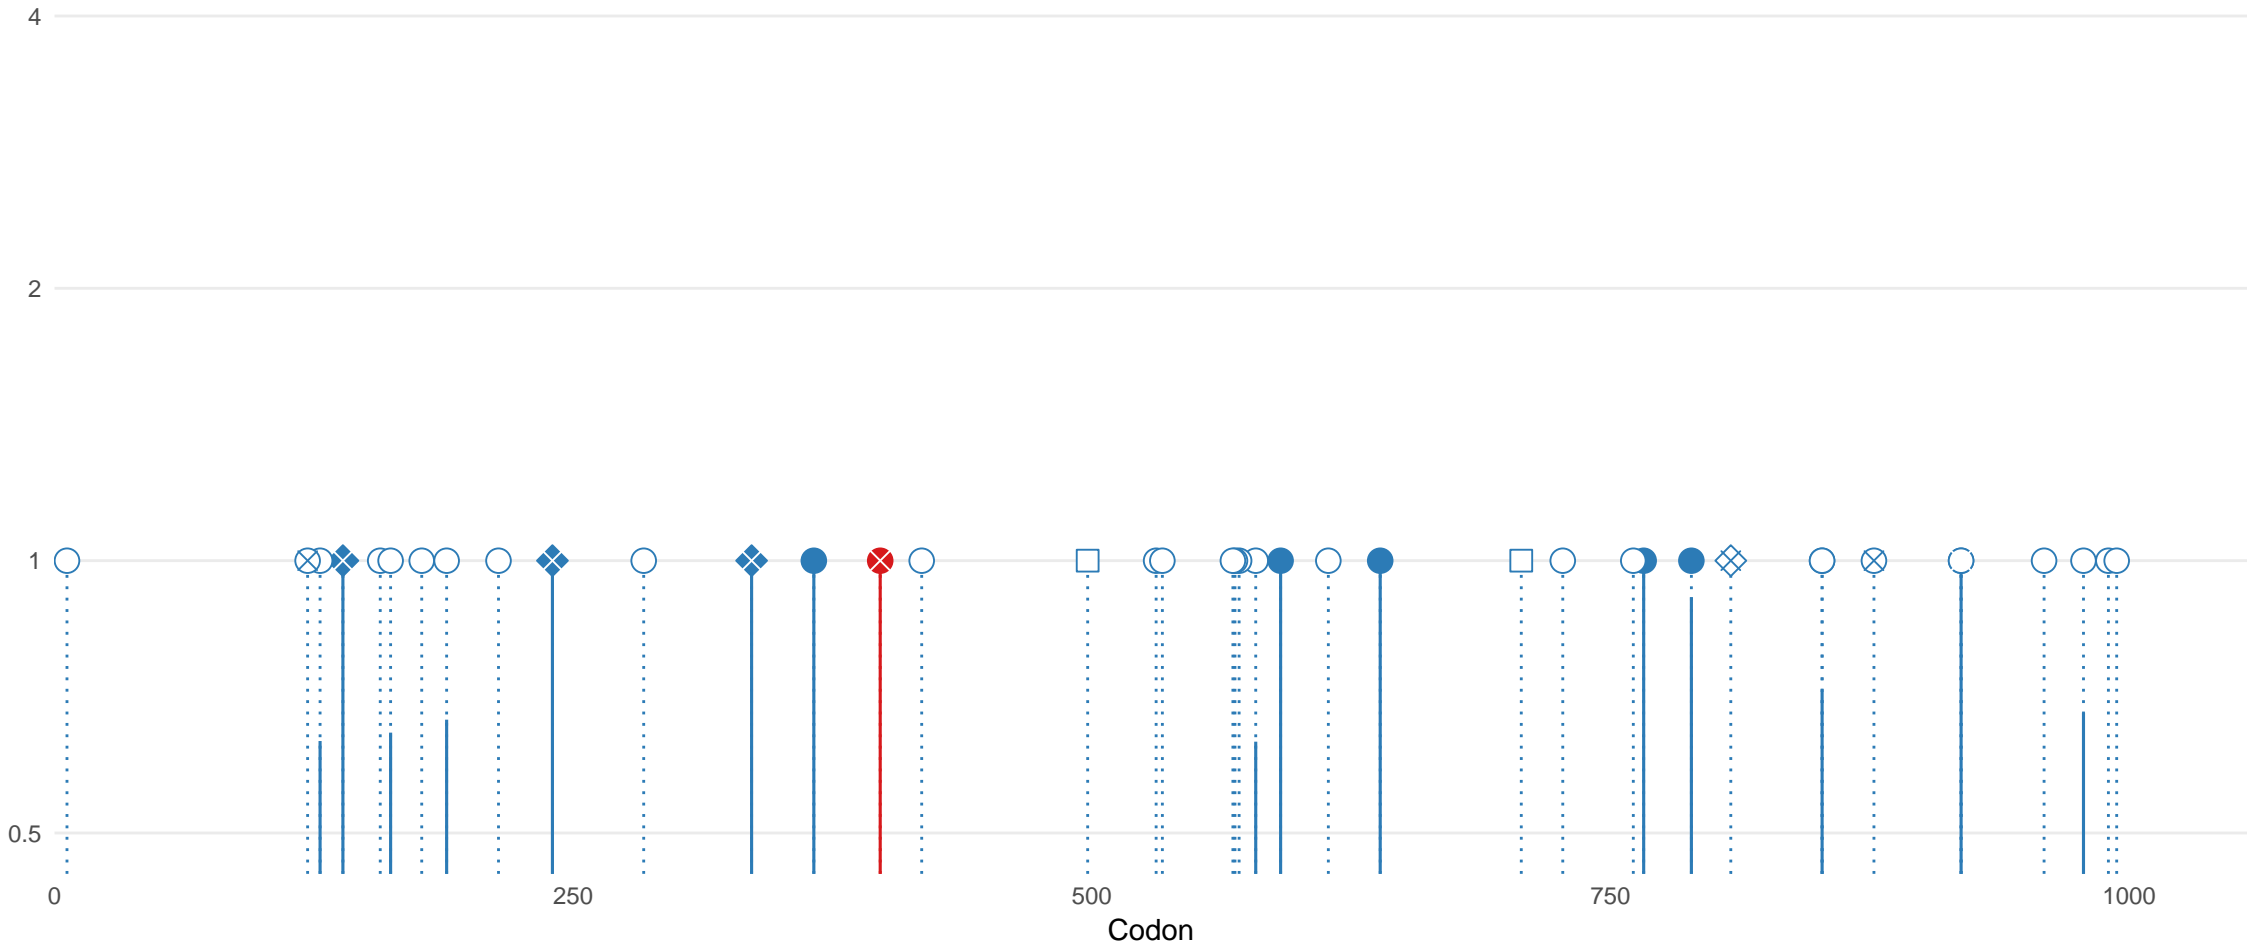

**Monoallelic:** ○ SNV □ MNV ◇ INDEL in frame ⊗ SNV nonsense ⊗ MNV nonsense ⊗ INDEL out of frame  
**Biallelic/Multihit:** ● SNV ■ MNV ◆ INDEL in frame ⊗ SNV nonsense ⊗ MNV nonsense ◆ INDEL out of frame  
**Hotspot:** ●

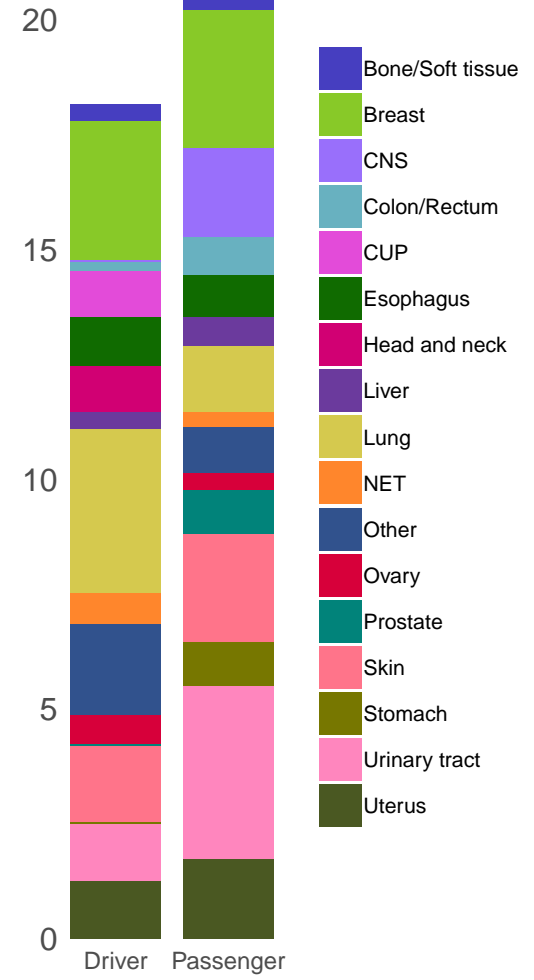

# RB1 Variants

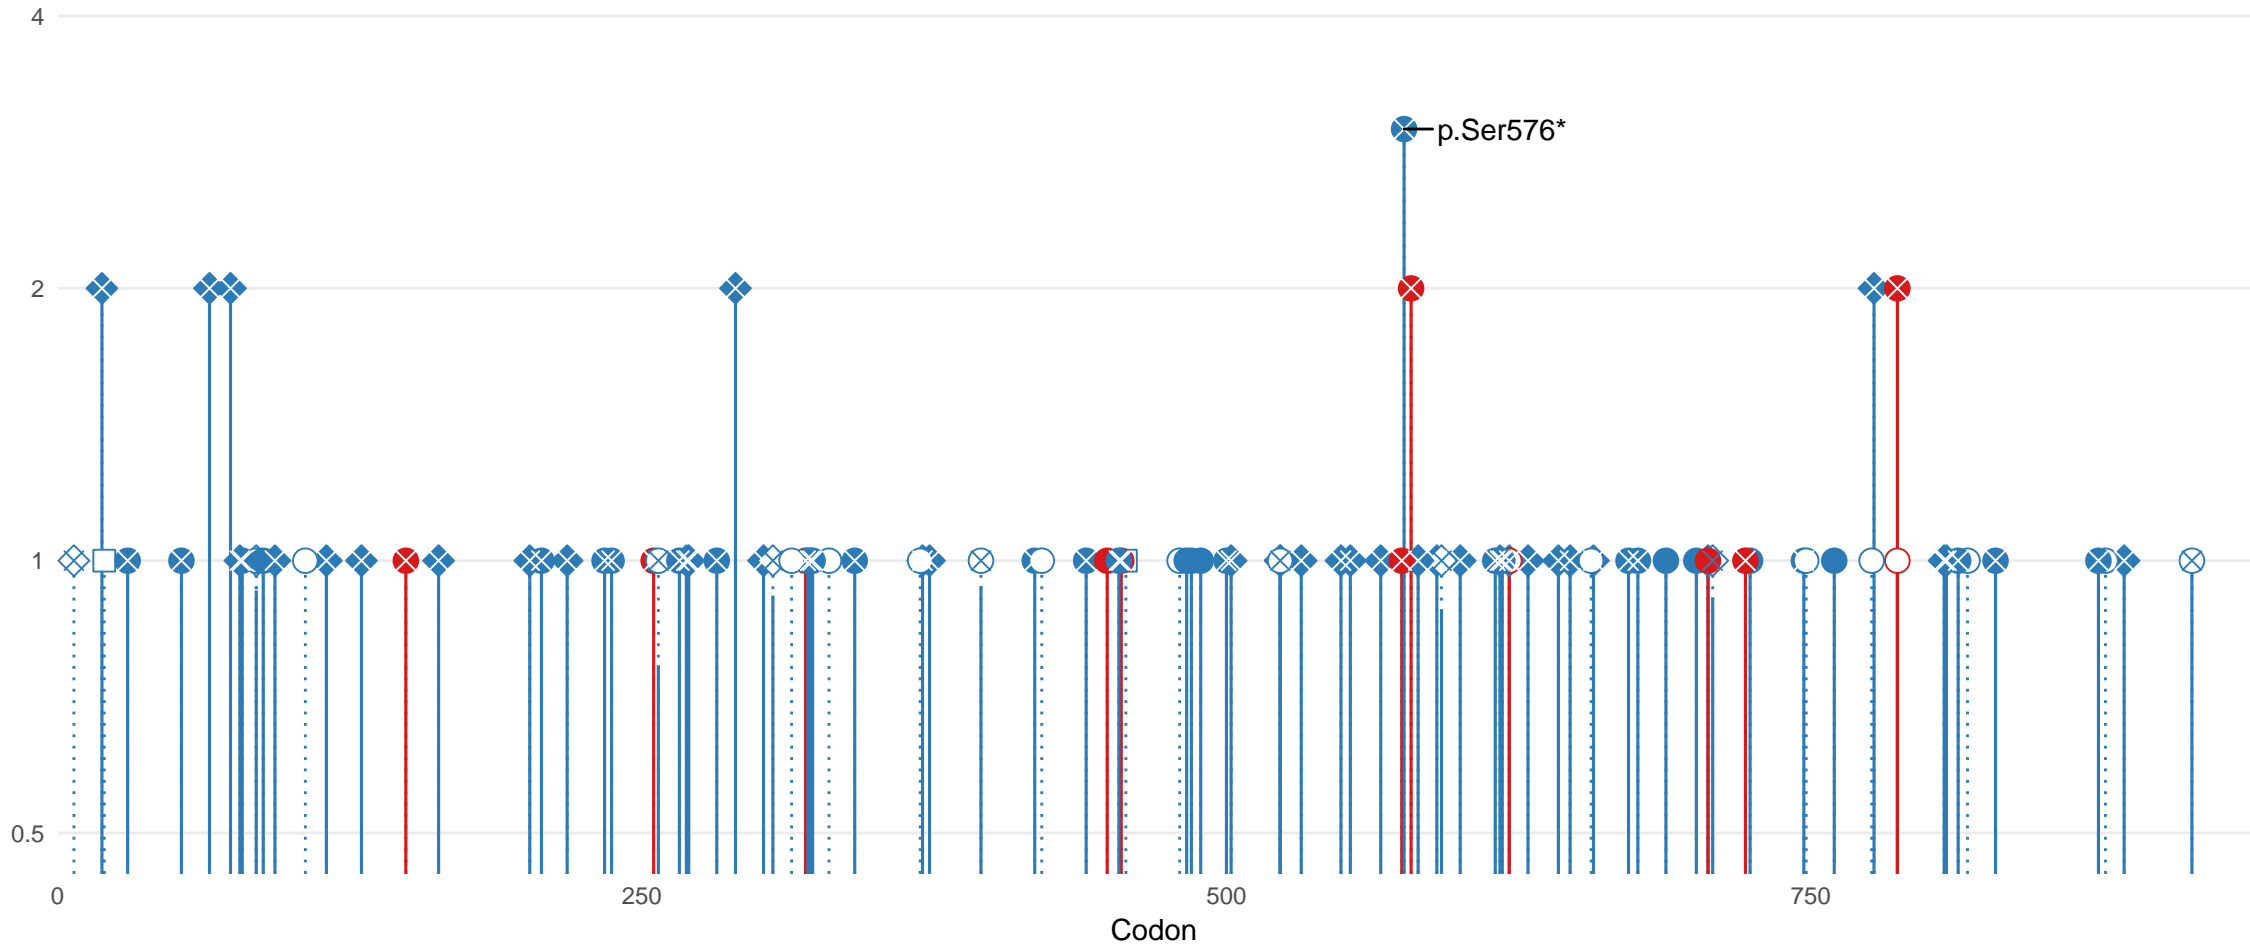

**Monoallelic:** ○ SNV □ MNV ◇ INDEL in frame ⊗ SNV nonsense ⊗ MNV nonsense ⊗ INDEL out of frame  
**Biallelic/Multihit:** ● SNV ■ MNV ◆ INDEL in frame ⊗ SNV nonsense ⊗ MNV nonsense ◆ INDEL out of frame  
**Hotspot:** ●

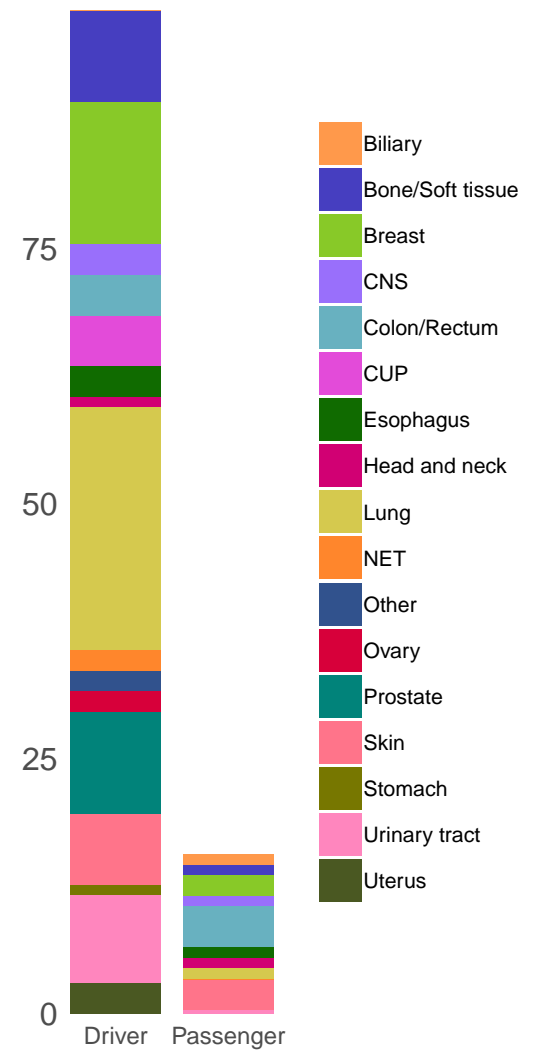



# RBM10 Variants

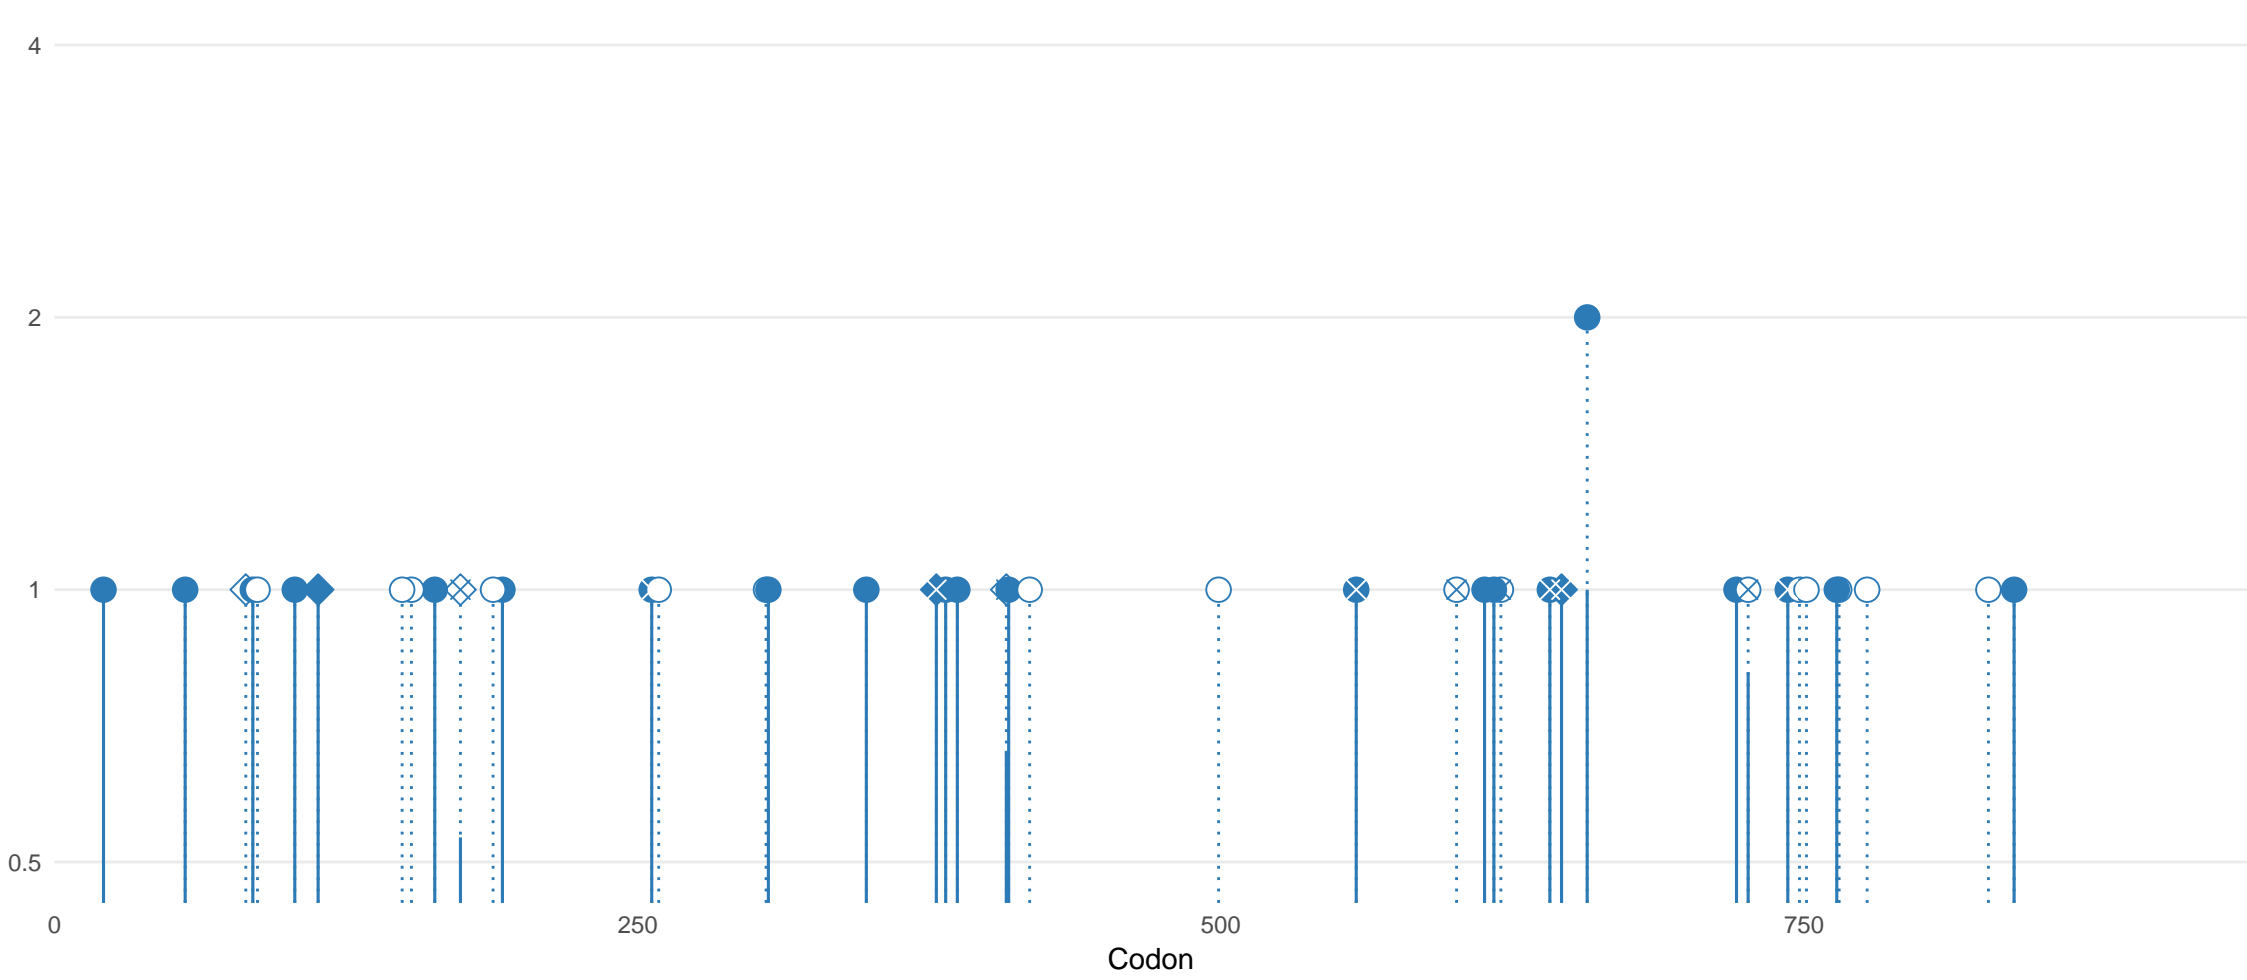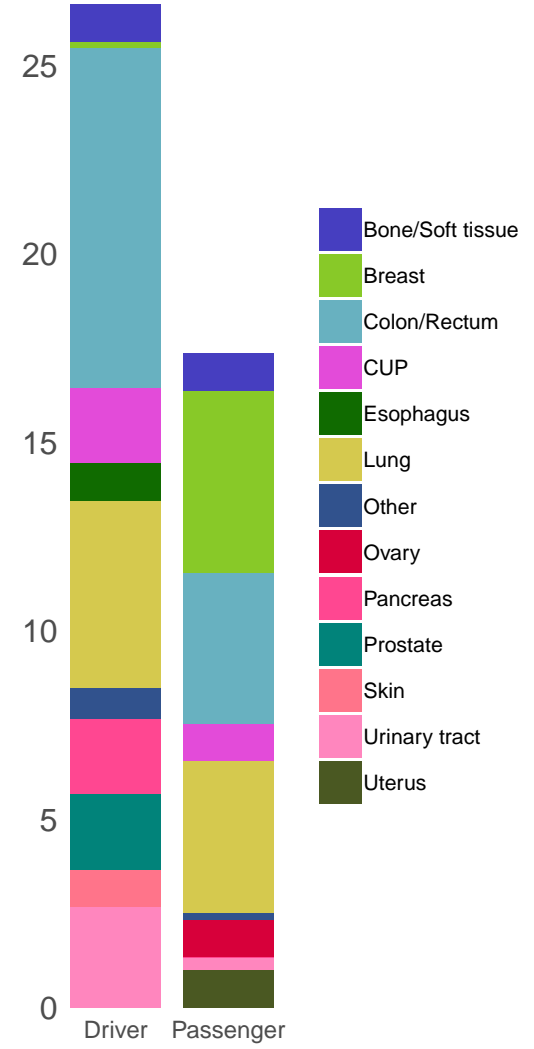

Monoallelic: ○ SNV □ MNV ◇ INDEL in frame ⊗ SNV nonsense ⊗ MNV nonsense ⊗ INDEL out of frame  
 Biallelic/Multi-hit: ● SNV ■ MNV ◆ INDEL in frame ⊗ SNV nonsense ⊗ MNV nonsense ◆ INDEL out of frame  
 Hotspot: ●

# RHOB Variants

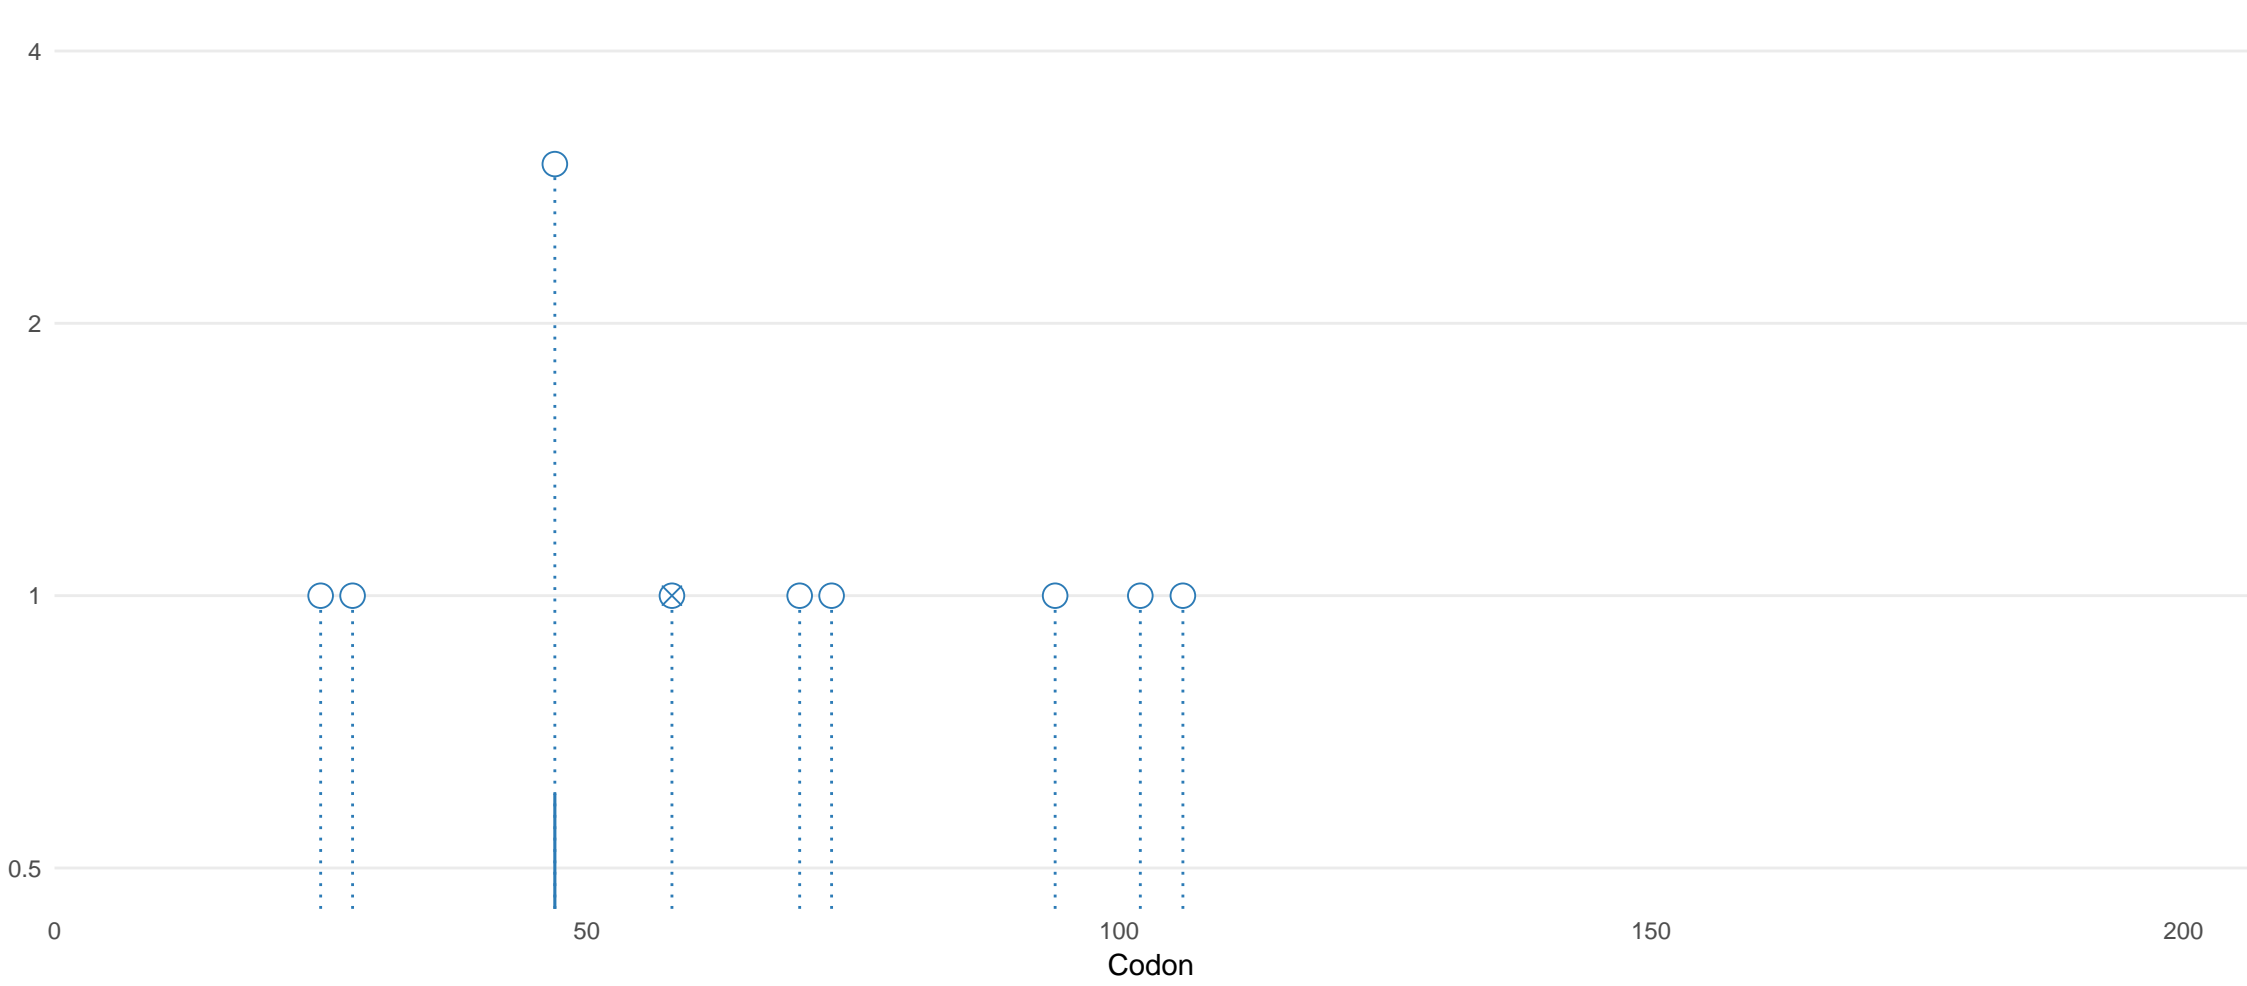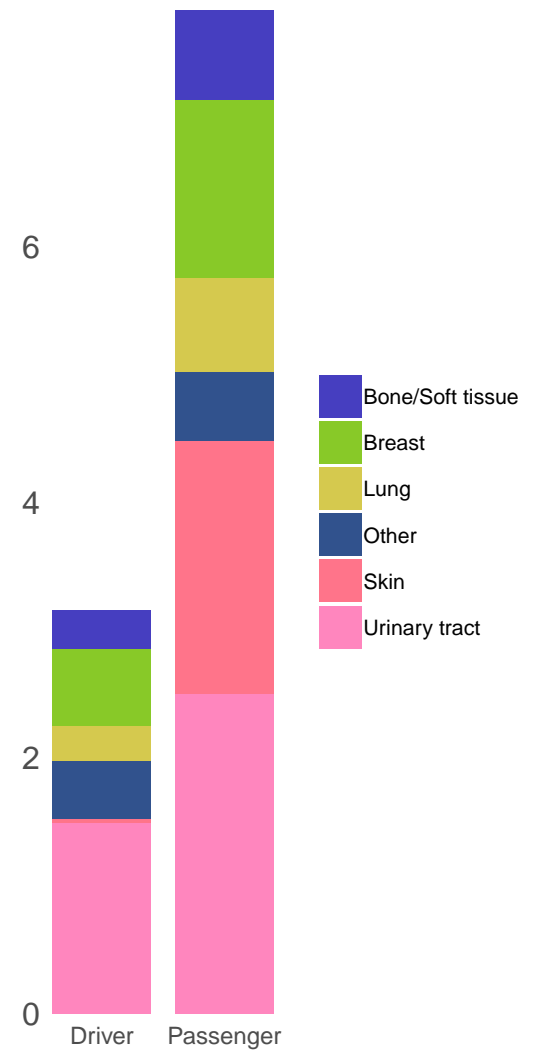

Monoallelic: ○ SNV □ MNV ◇ INDEL in frame ⊗ SNV nonsense ⊗ MNV nonsense ⊗ INDEL out of frame  
 Biallelic/Multihit: ● SNV ■ MNV ◆ INDEL in frame ⊗ SNV nonsense ⊗ MNV nonsense ◆ INDEL out of frame  
 Hotspot: ●

# RNF43 Variants

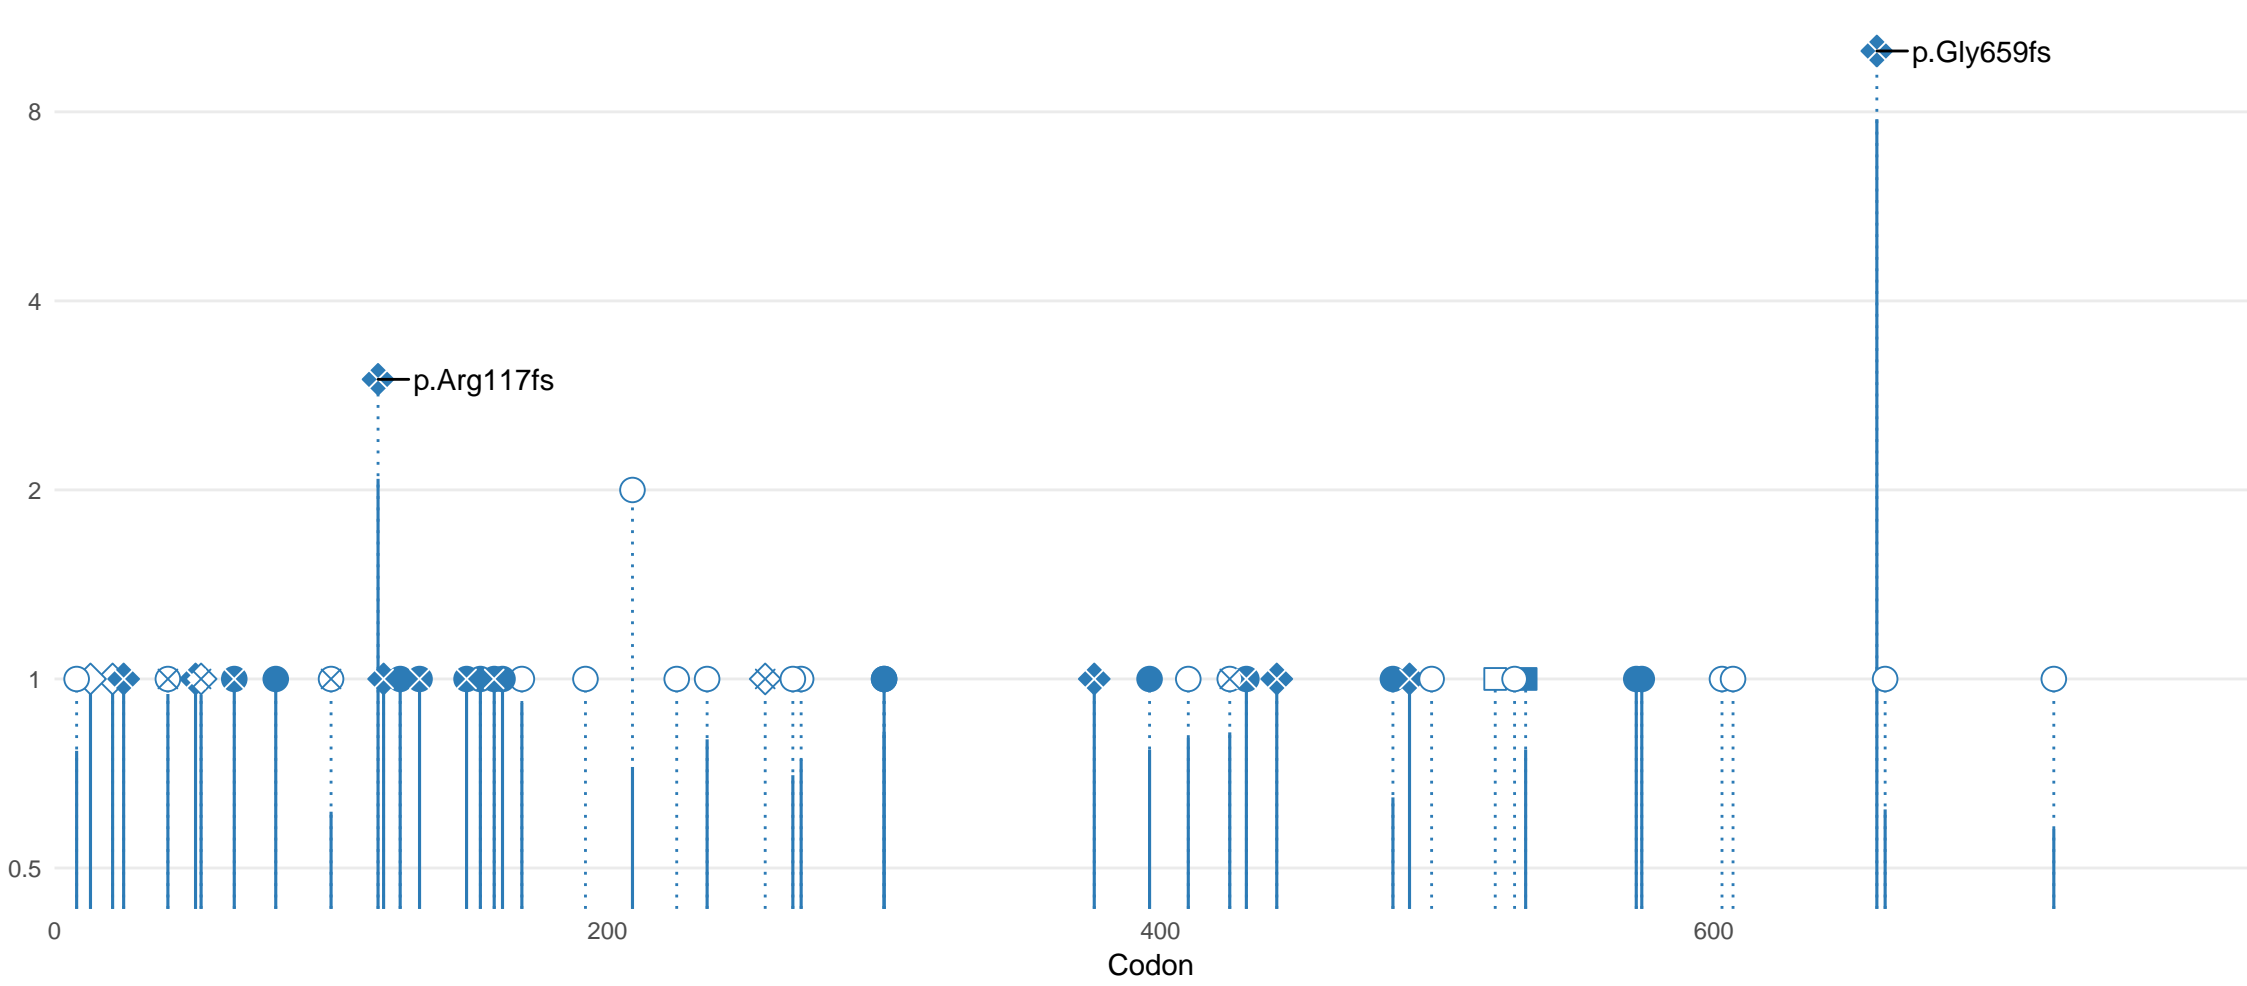

Monoallelic: ○ SNV □ MNV ◇ INDEL in frame ⊗ SNV nonsense ⊗ MNV nonsense ⊗ INDEL out of frame  
 Biallelic/Multihit: ● SNV ■ MNV ◆ INDEL in frame ⊗ SNV nonsense ⊗ MNV nonsense ◆ INDEL out of frame Hotspot: ●

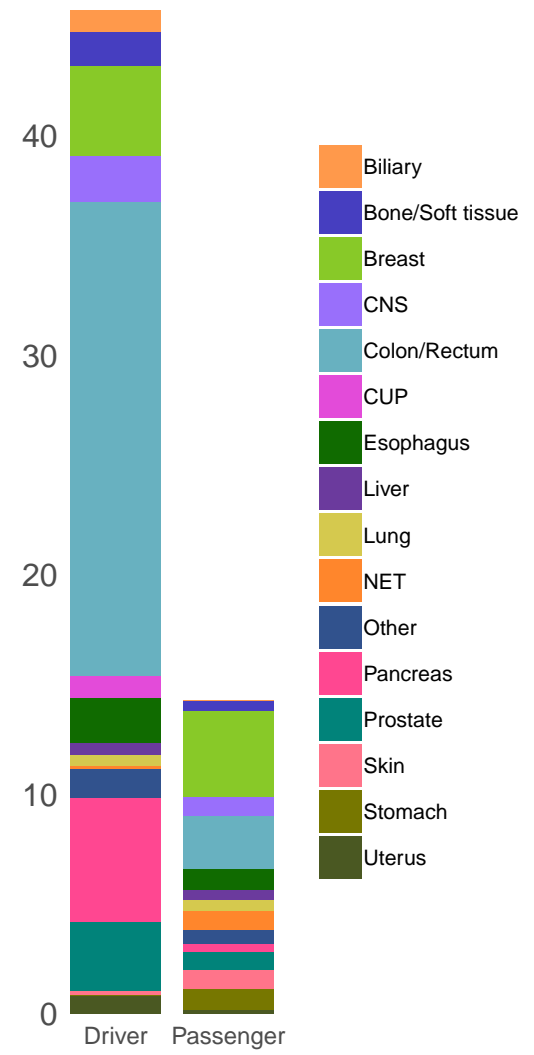

# RPL10 Variants

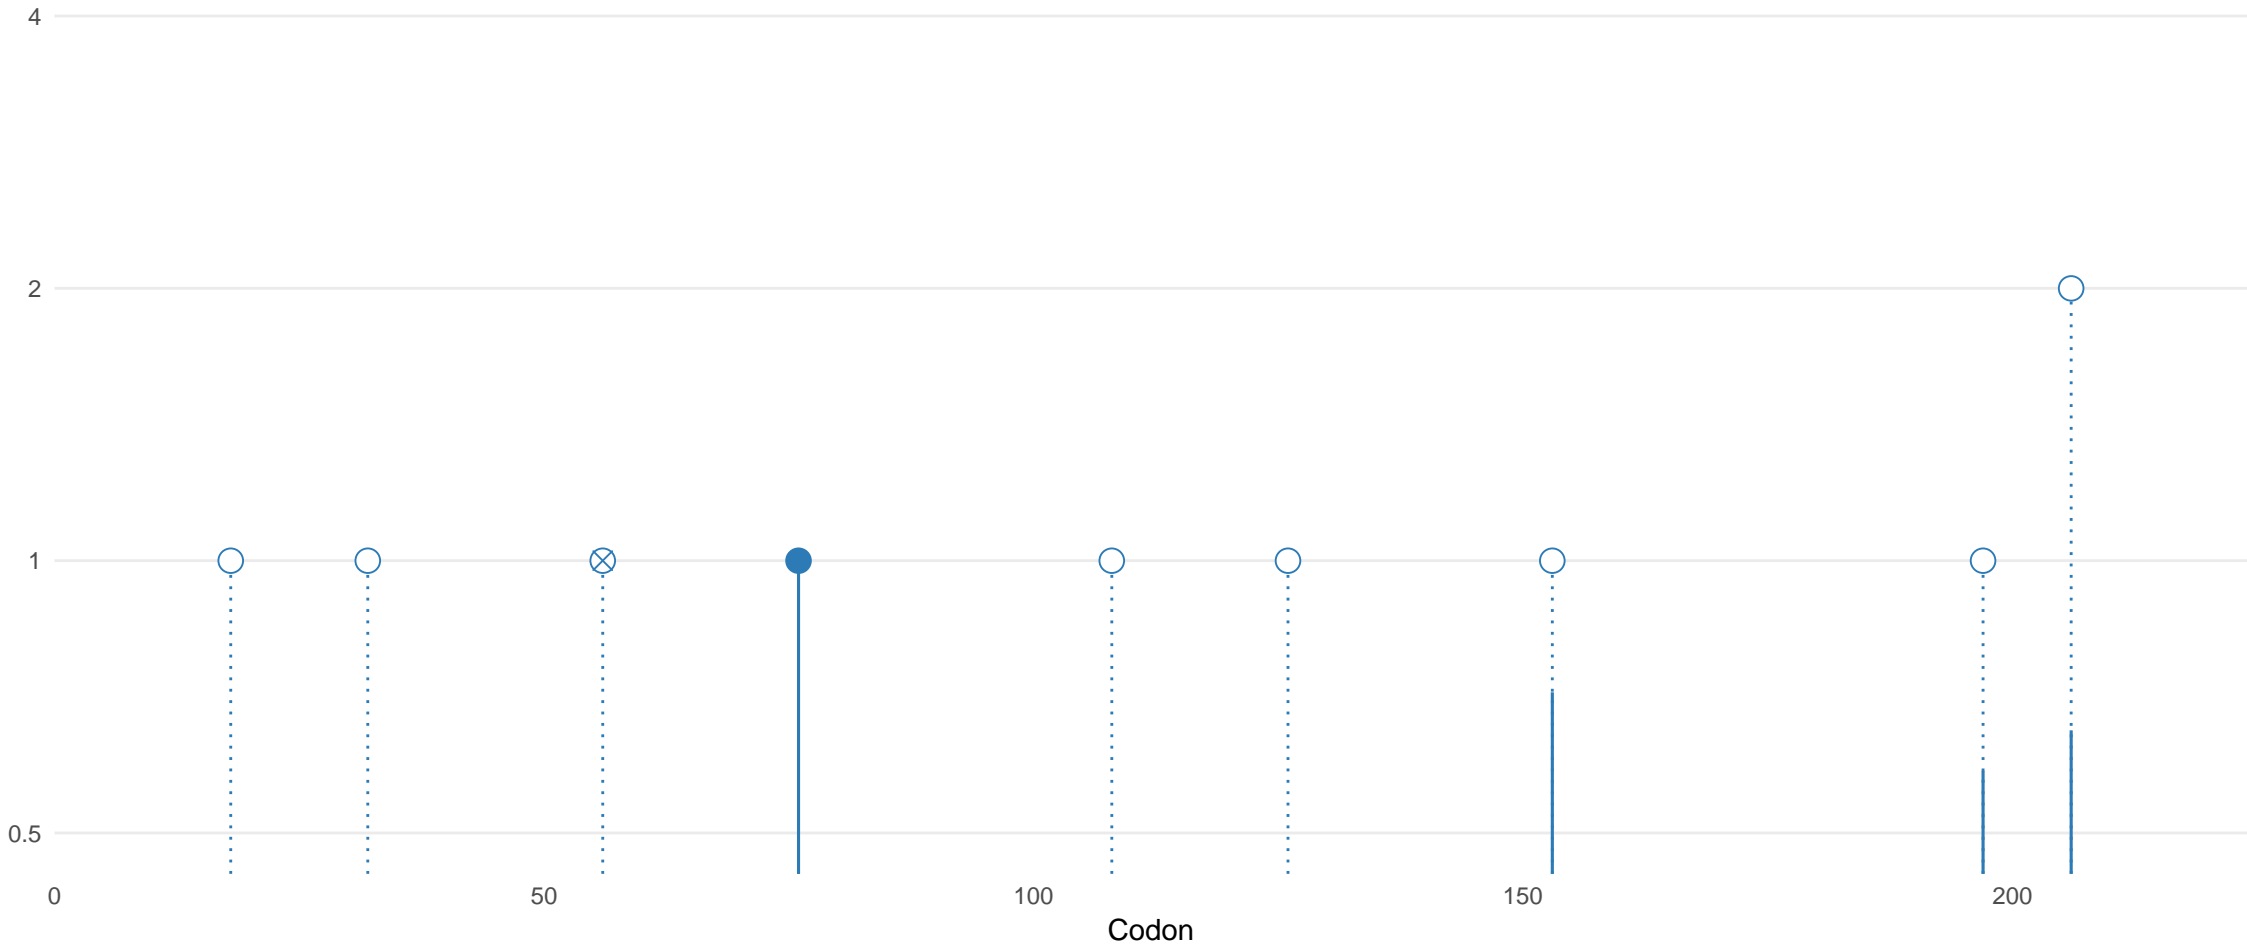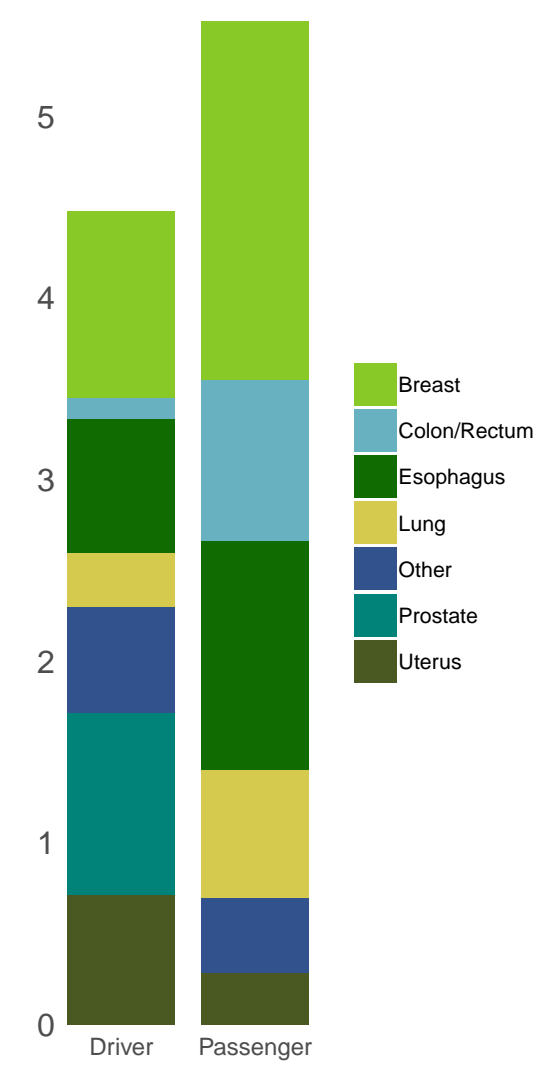

Monoallelic: ○ SNV □ MNV ◇ INDEL in frame ⊗ SNV nonsense ⊠ MNV nonsense ⊞ INDEL out of frame  
 Biallelic/Multihit: ● SNV ■ MNV ◆ INDEL in frame ⊗ SNV nonsense ⊠ MNV nonsense ⊞ INDEL out of frame  
 Hotspot: ●

# RPL5 Variants

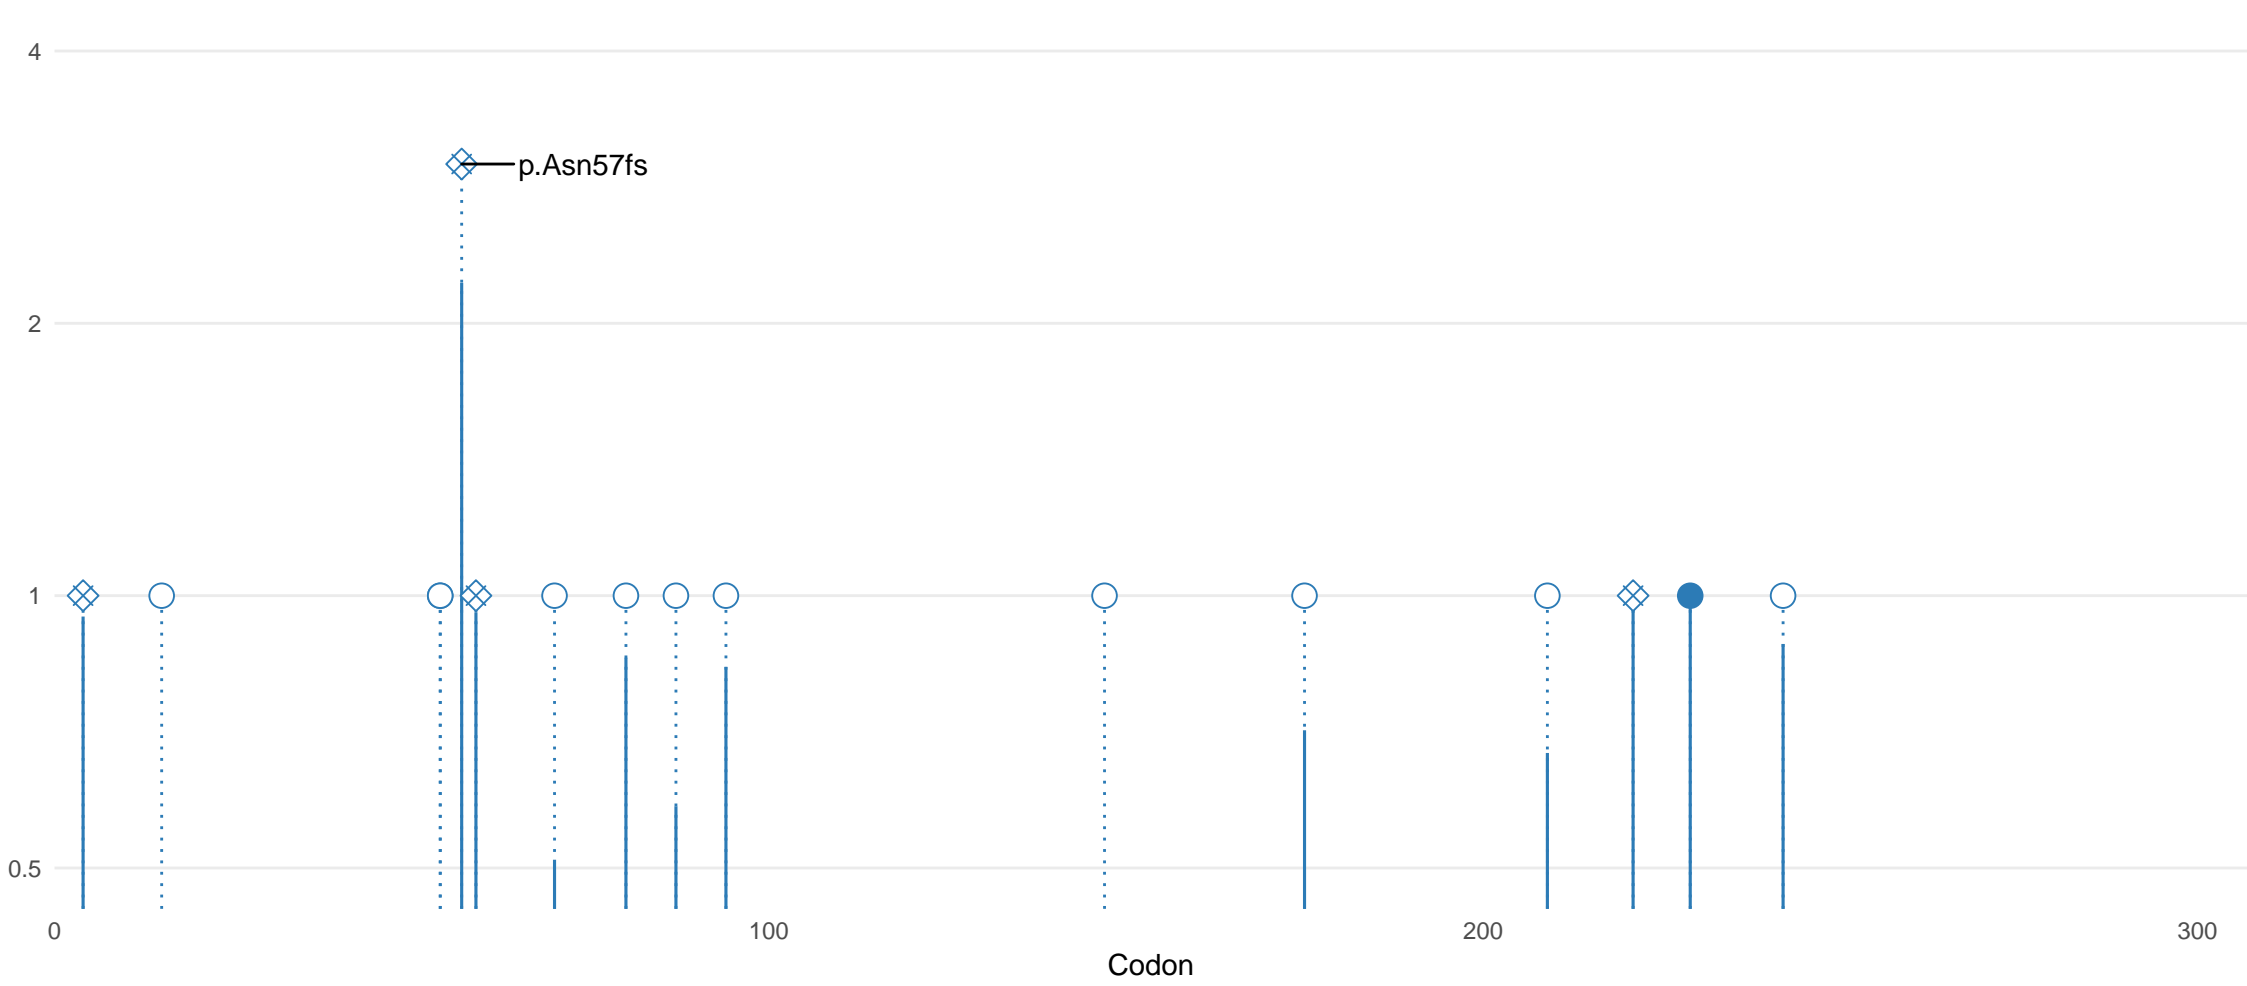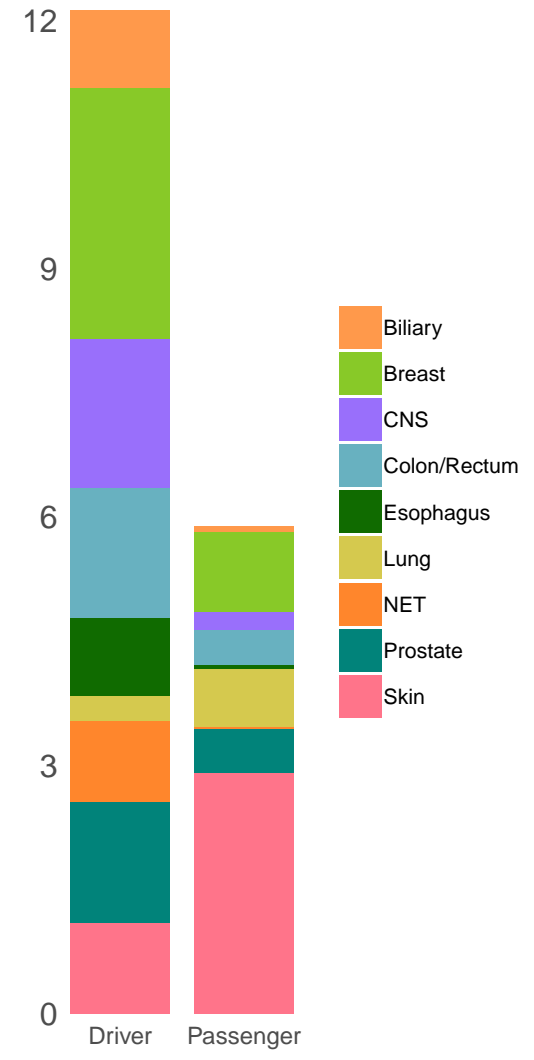

Monoallelic: ○ SNV □ MNV ◇ INDEL in frame ⊠ SNV nonsense ⊠ MNV nonsense ⊠ INDEL out of frame Biallelic/Multihit: ● SNV ■ MNV ◆ INDEL in frame ⊠ SNV nonsense ⊠ MNV nonsense ◆ INDEL out of frame Hotspot: ●

# RPS6KA3 Variants

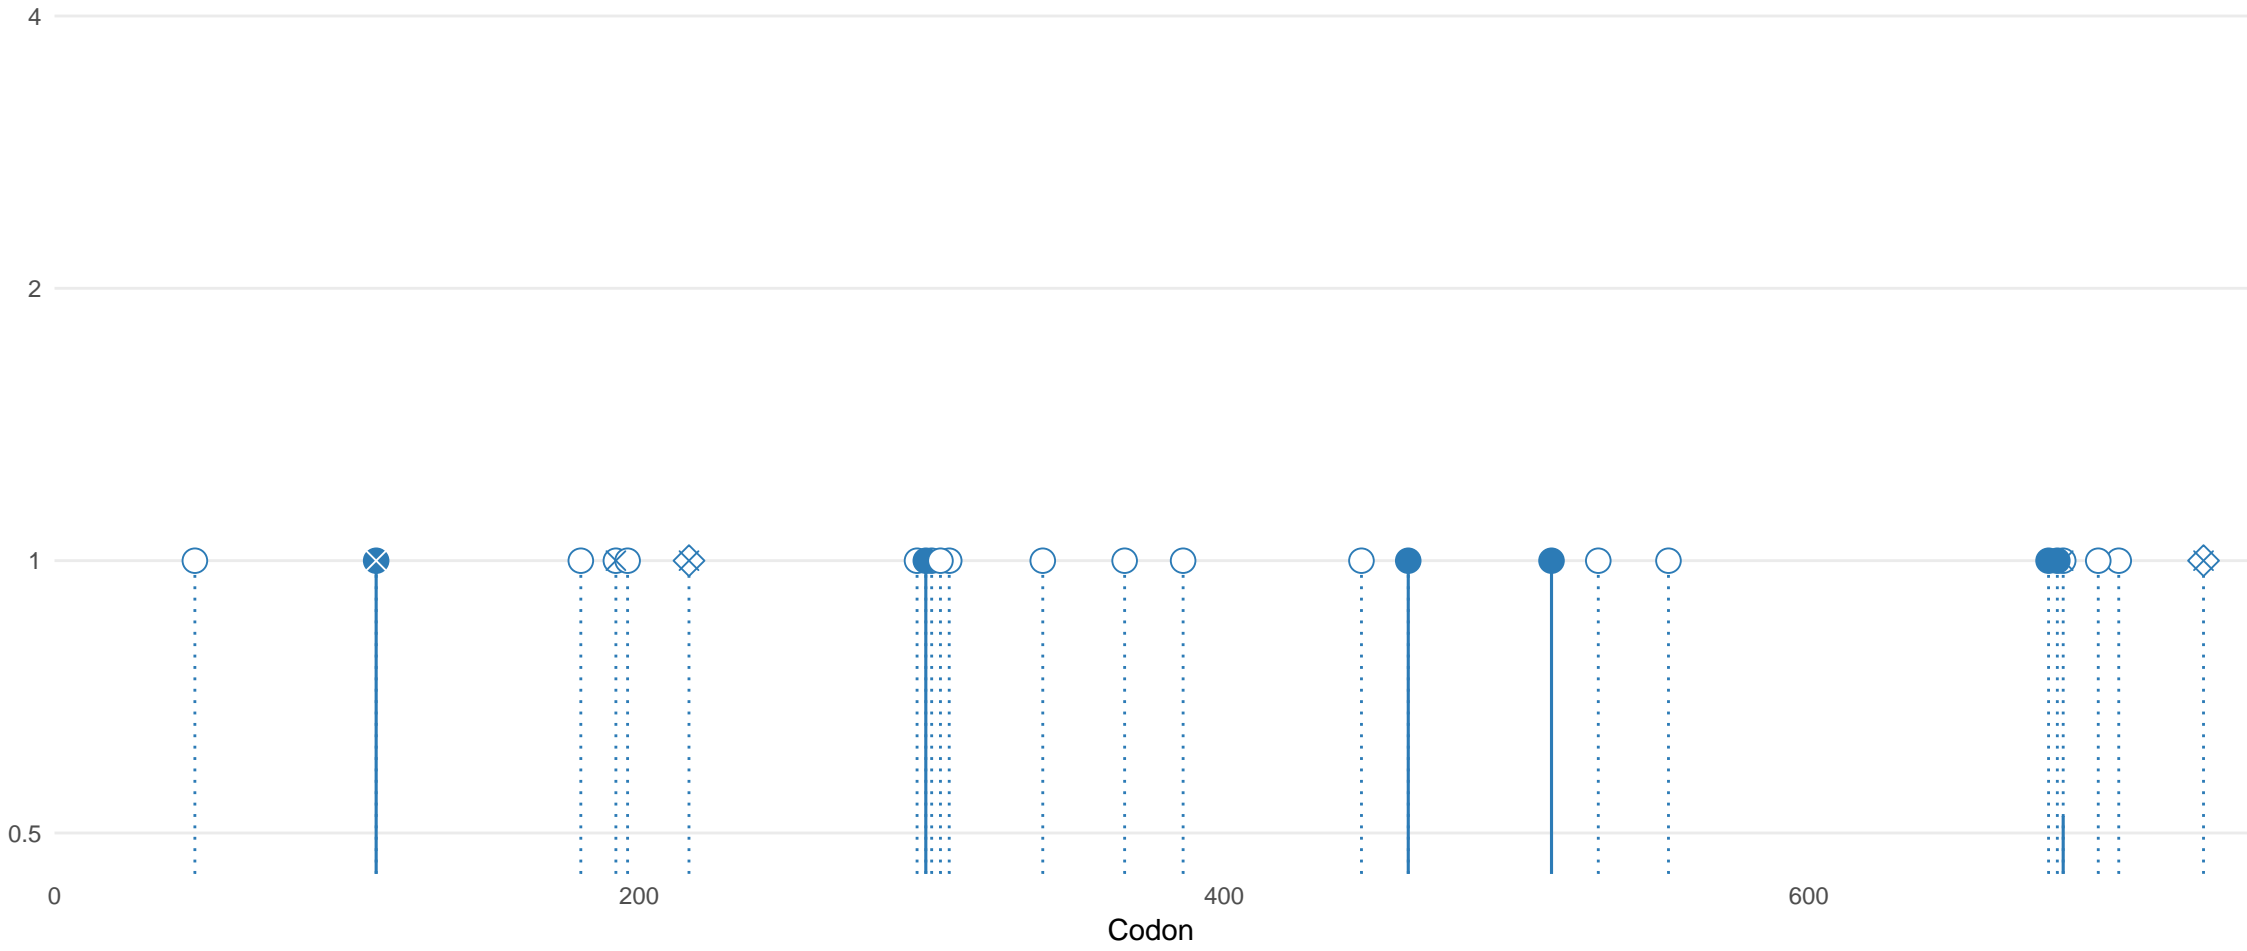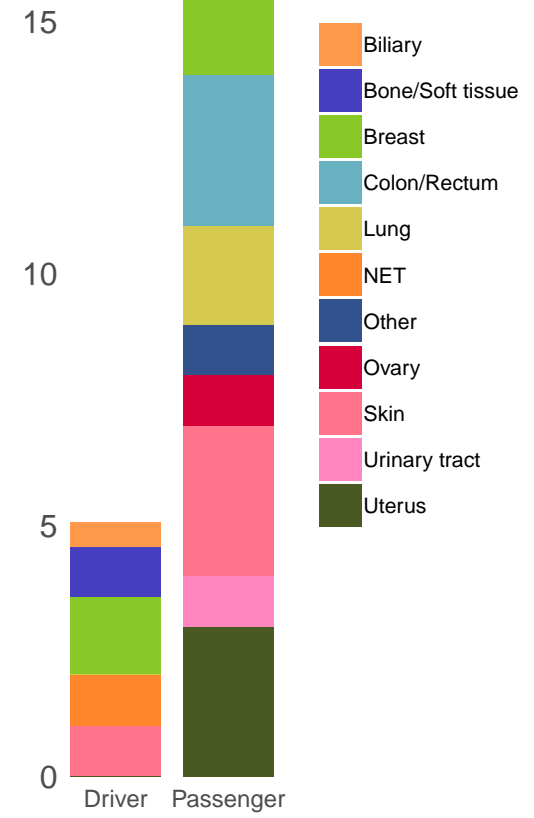

# RUNX1 Variants

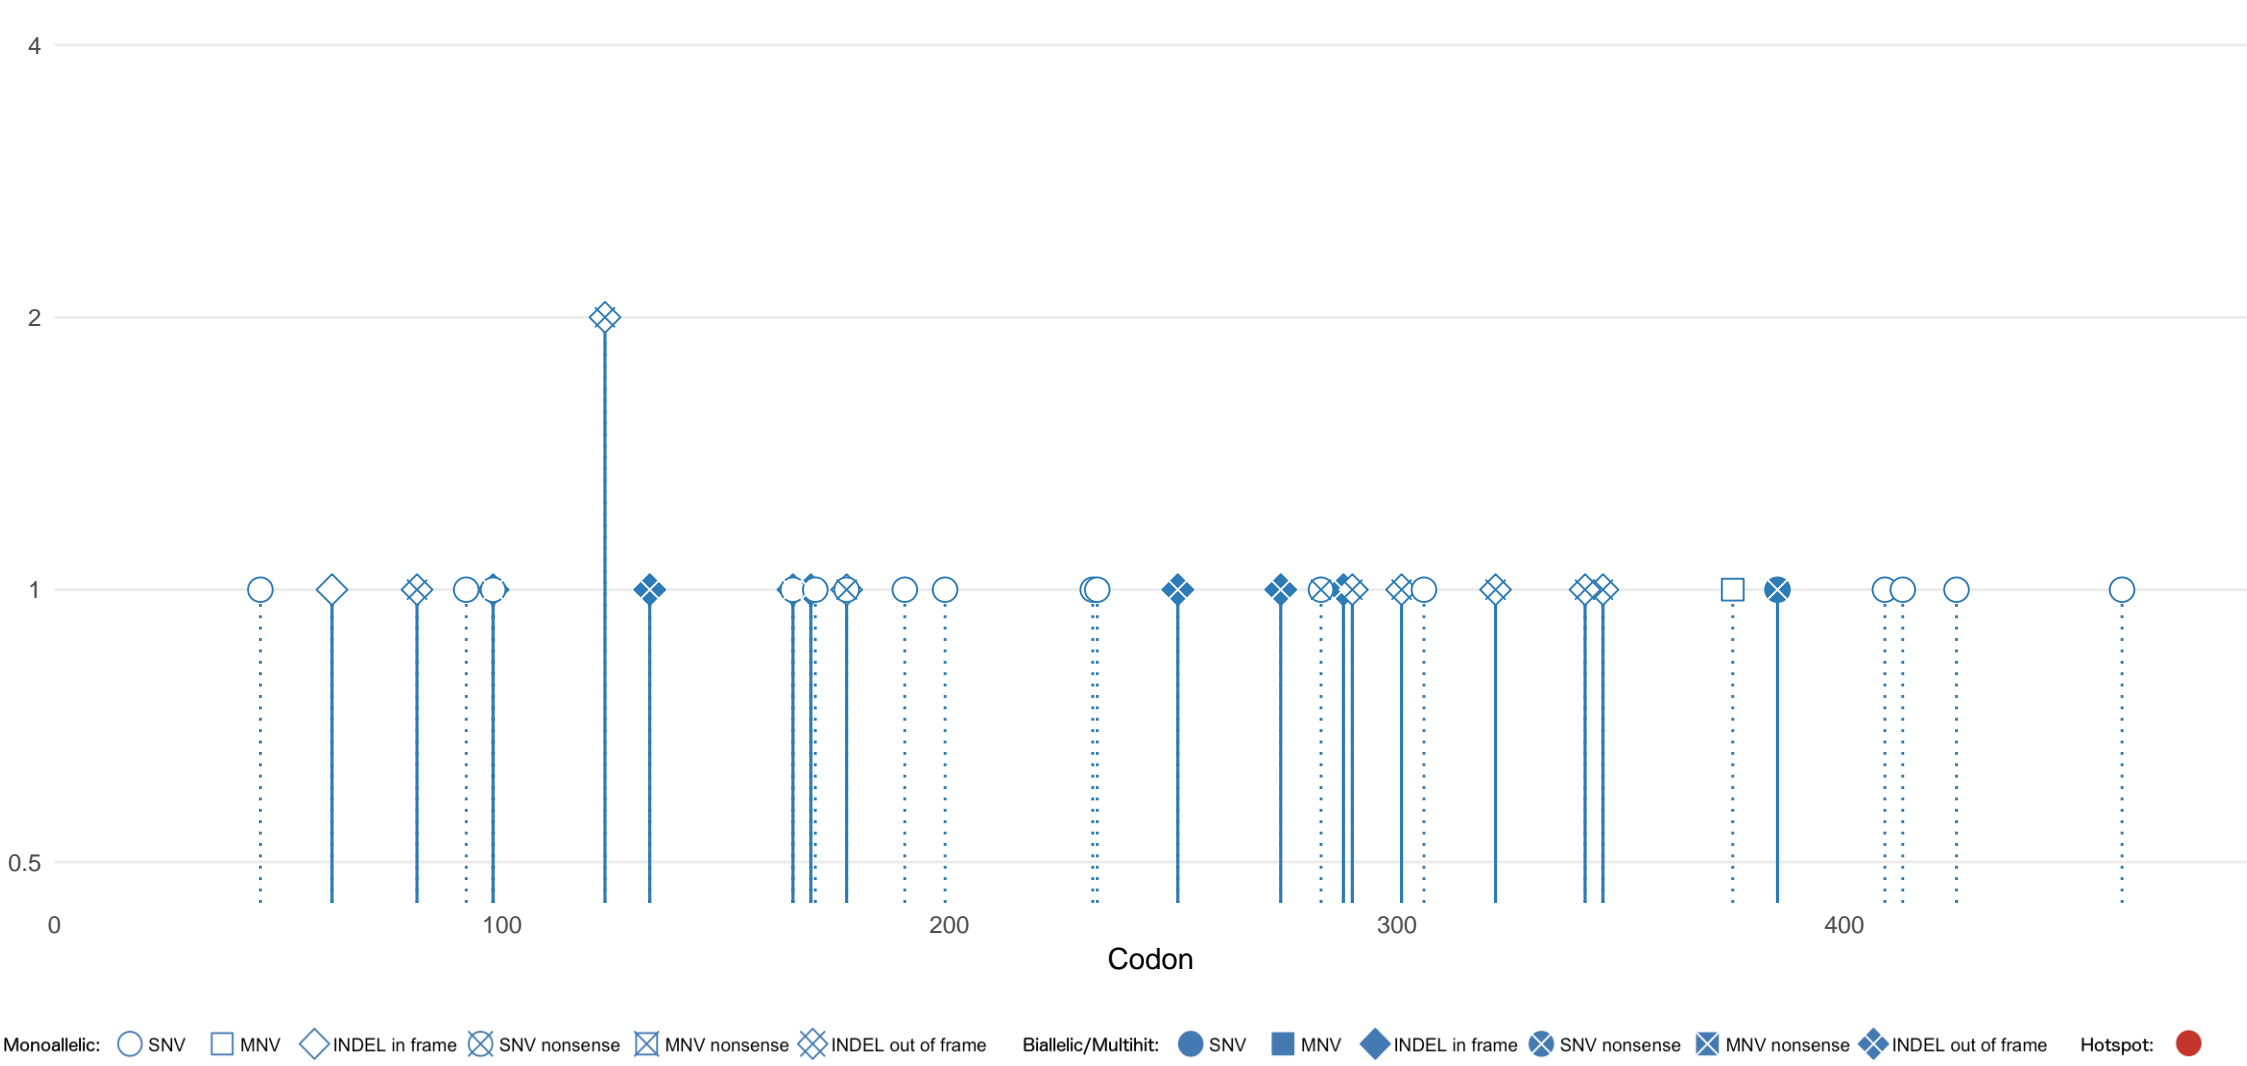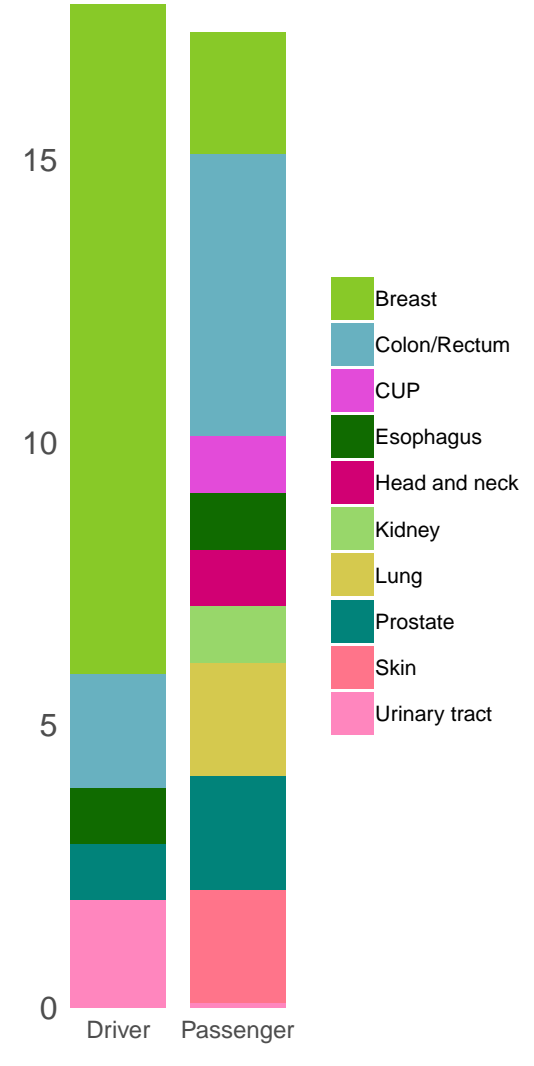

# RXRA Variants

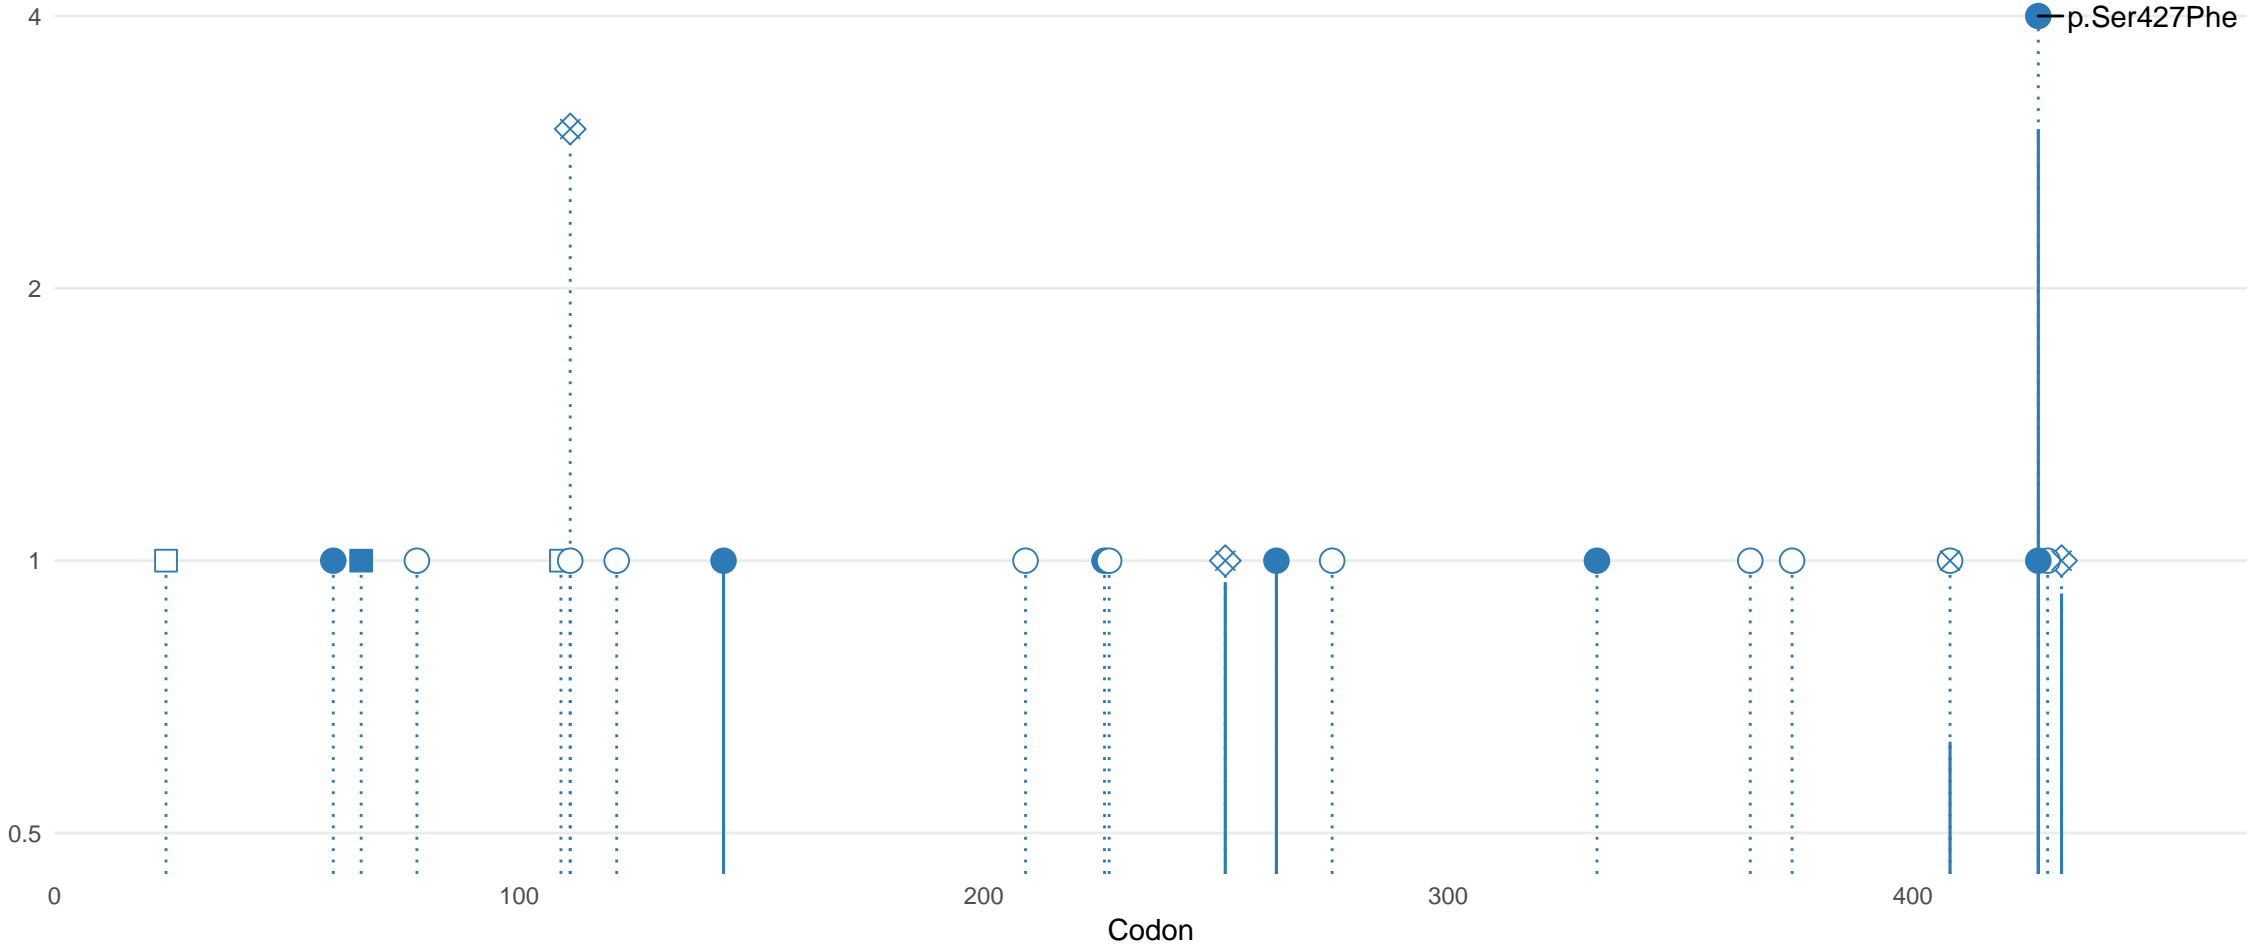

Monoallelic: ○ SNV □ MNV ◇ INDEL in frame ⊗ SNV nonsense ⊠ MNV nonsense ⬠ INDEL out of frame  
 Biallelic/Multihit: ● SNV ■ MNV ◆ INDEL in frame ⊗ SNV nonsense ⊠ MNV nonsense ⬠ INDEL out of frame Hotspot: ●

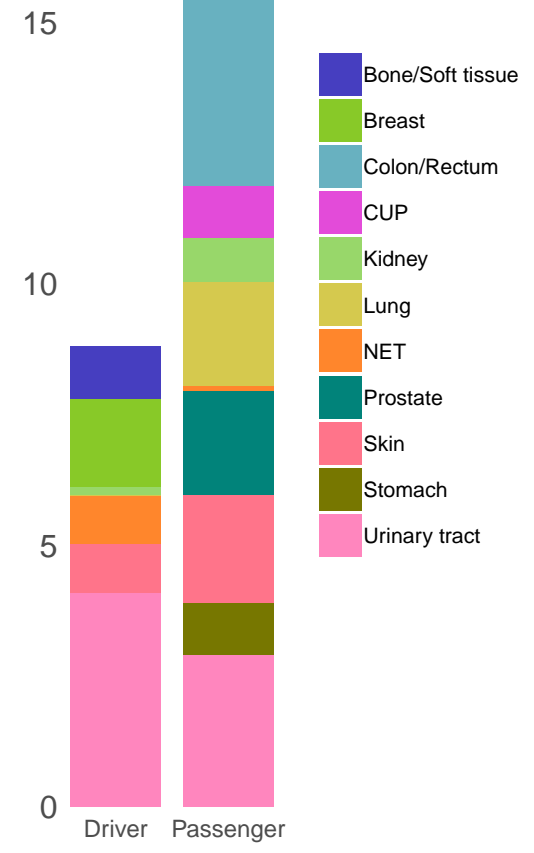



# SETD2 Variants

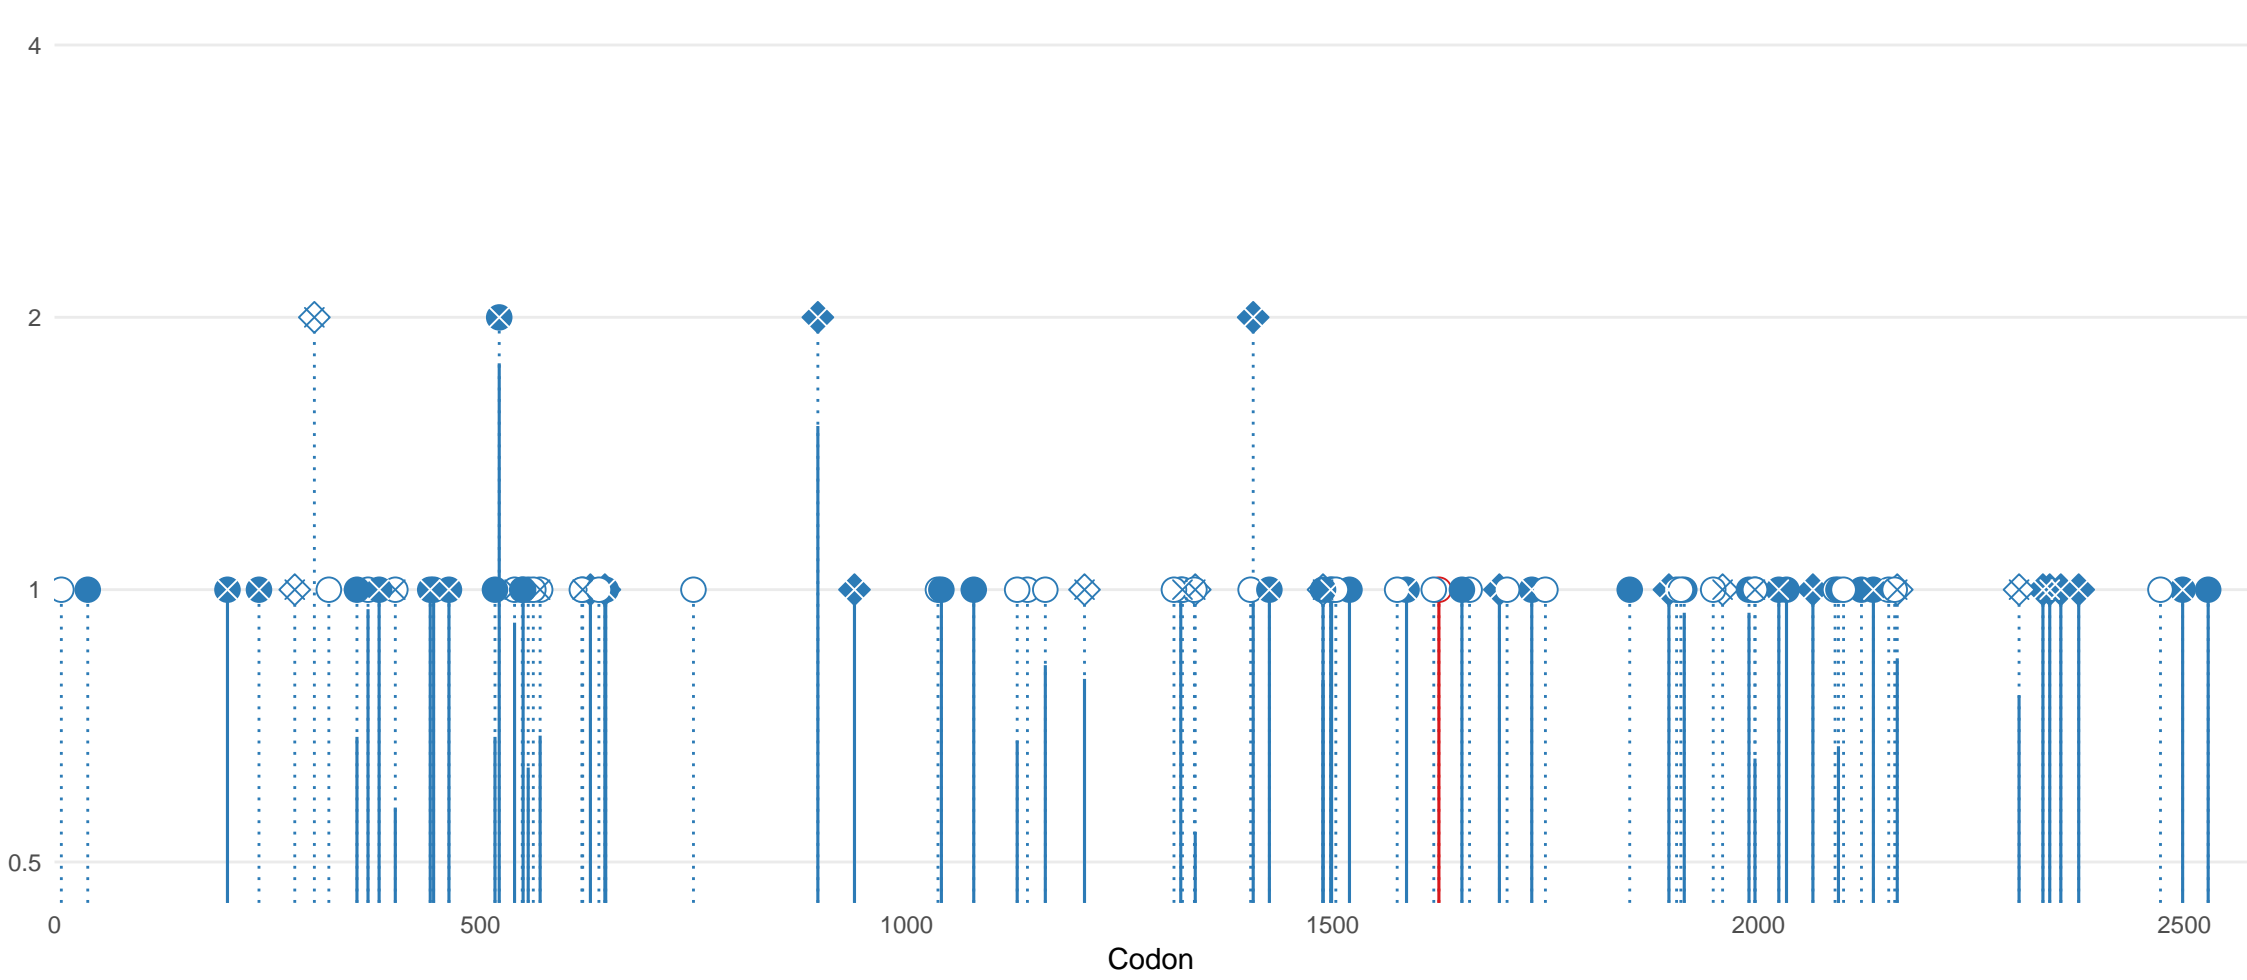

**Monoallelic:** ○ SNV □ MNV ◇ INDEL in frame ⊗ SNV nonsense ⊗ MNV nonsense ⊗ INDEL out of frame  
**Biallelic/Multihit:** ● SNV ■ MNV ◆ INDEL in frame ⊗ SNV nonsense ⊗ MNV nonsense ◆ INDEL out of frame  
**Hotspot:** ●

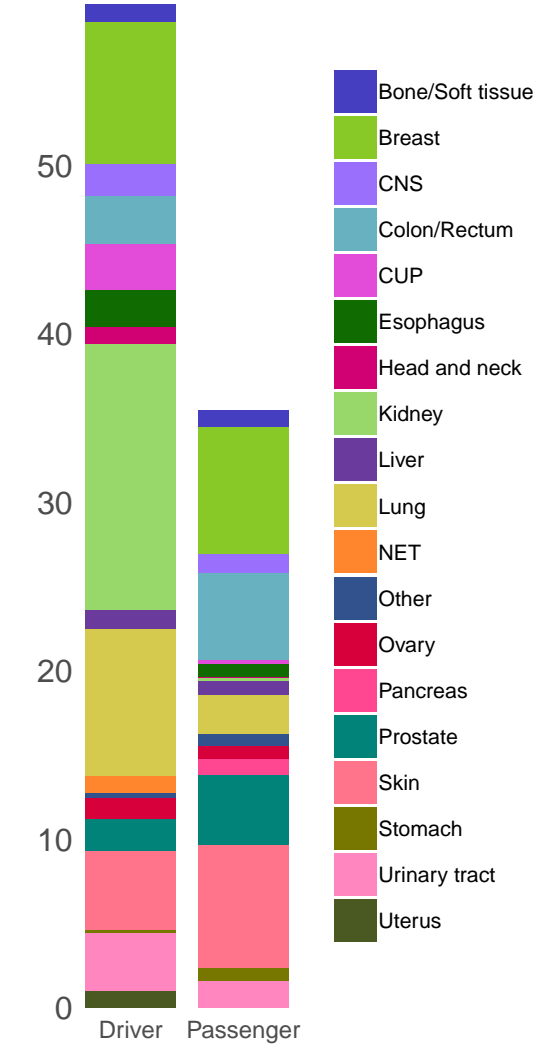

# SH2B3 Variants

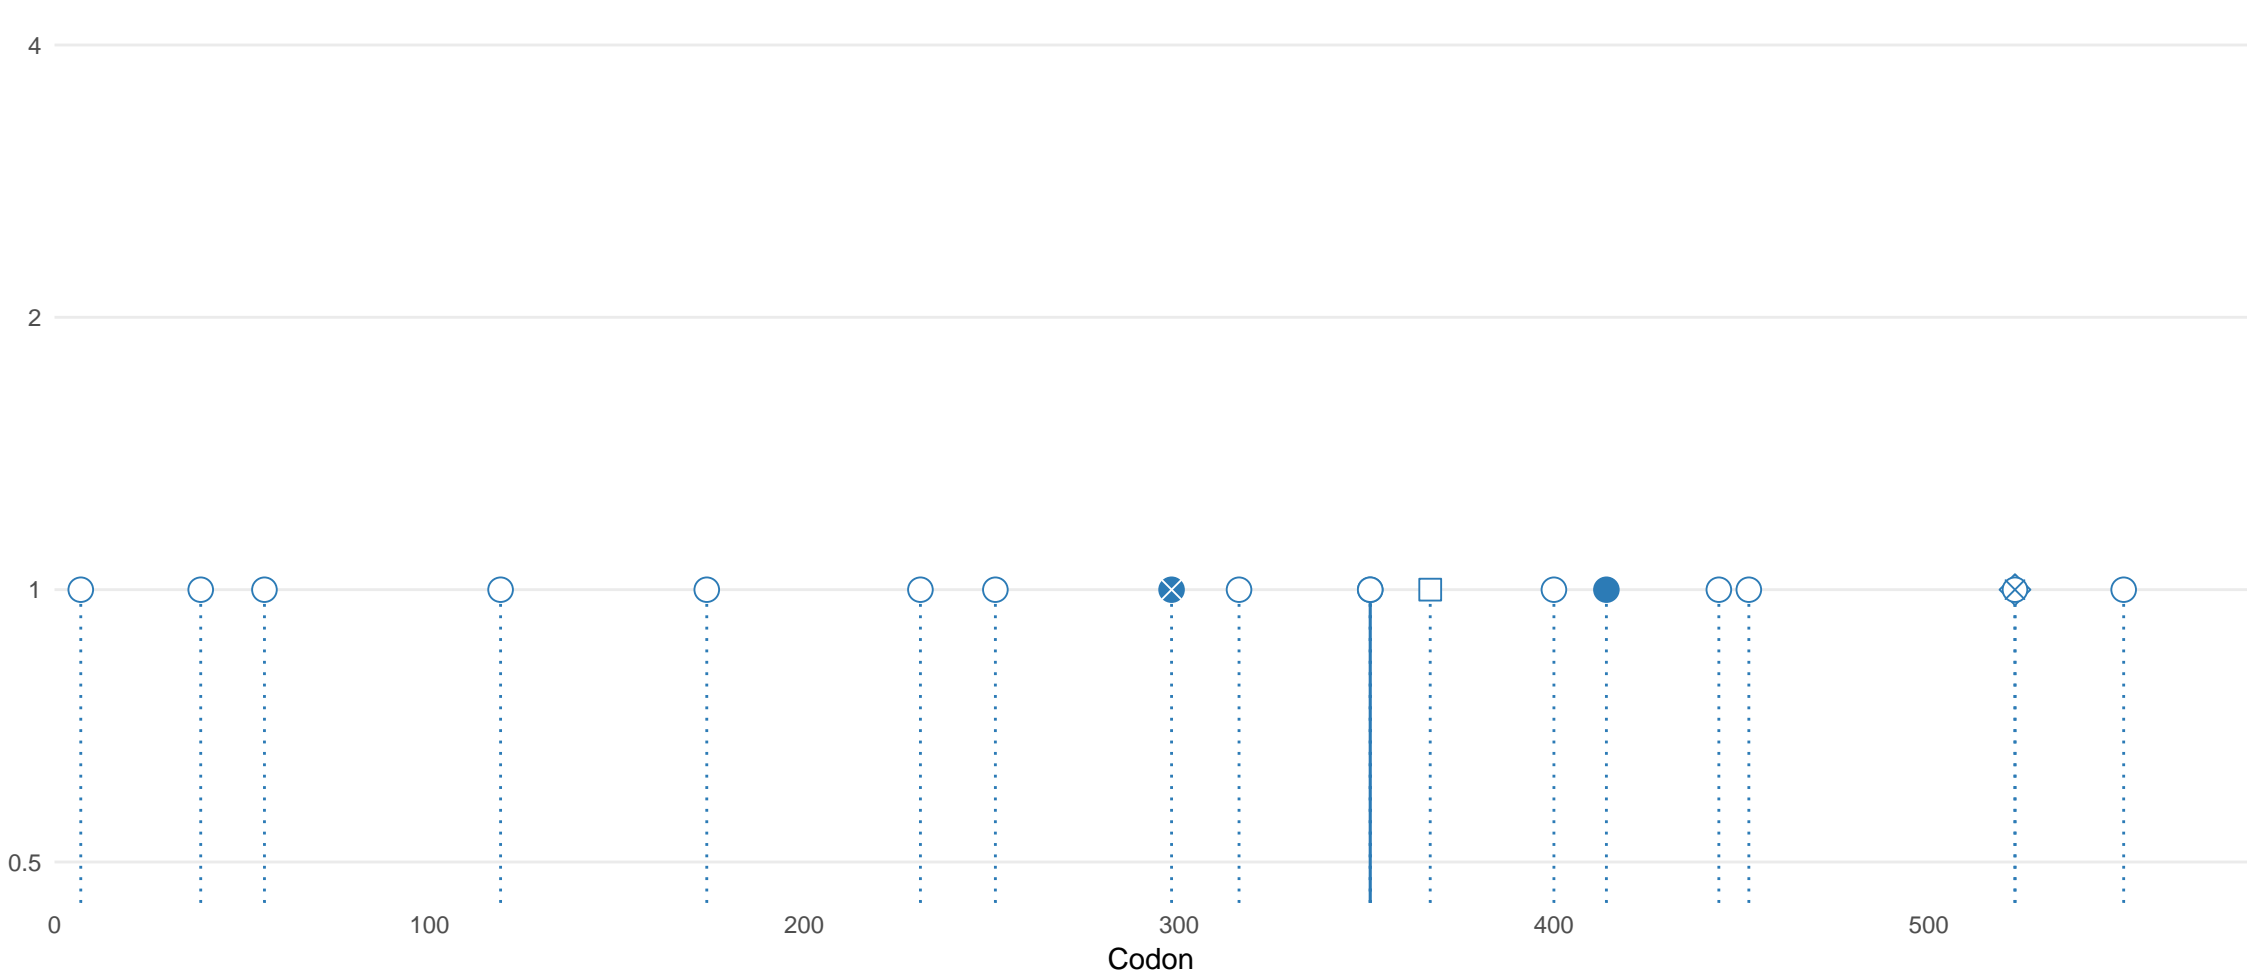

**Monoallelic:** ○ SNV □ MNV ◇ INDEL in frame ⊗ SNV nonsense ⊗ MNV nonsense ⊗ INDEL out of frame  
**Biallelic/Multi-hit:** ● SNV ■ MNV ◆ INDEL in frame ⊗ SNV nonsense ⊗ MNV nonsense ⊗ INDEL out of frame  
**Hotspot:** ●

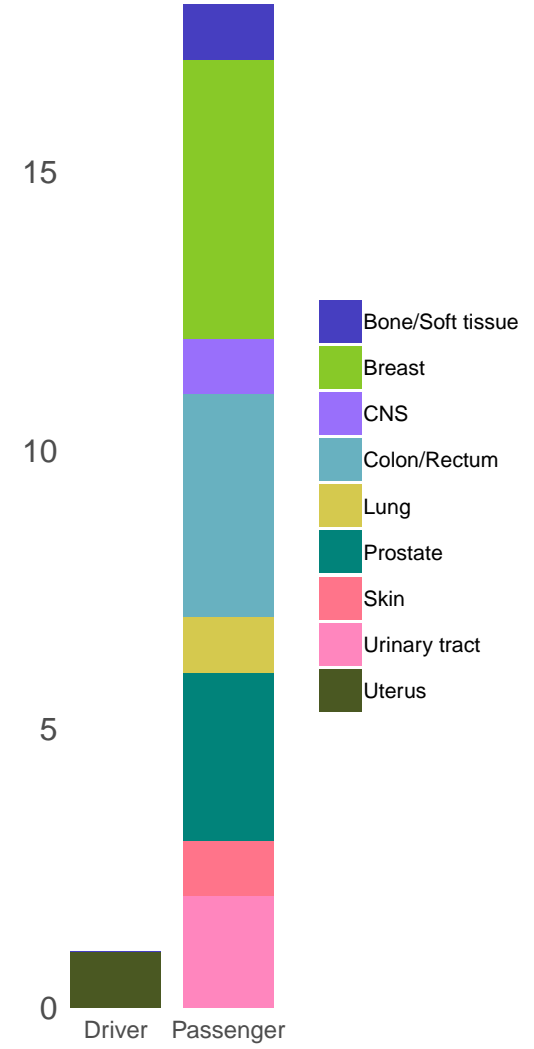

# SIX2 Variants

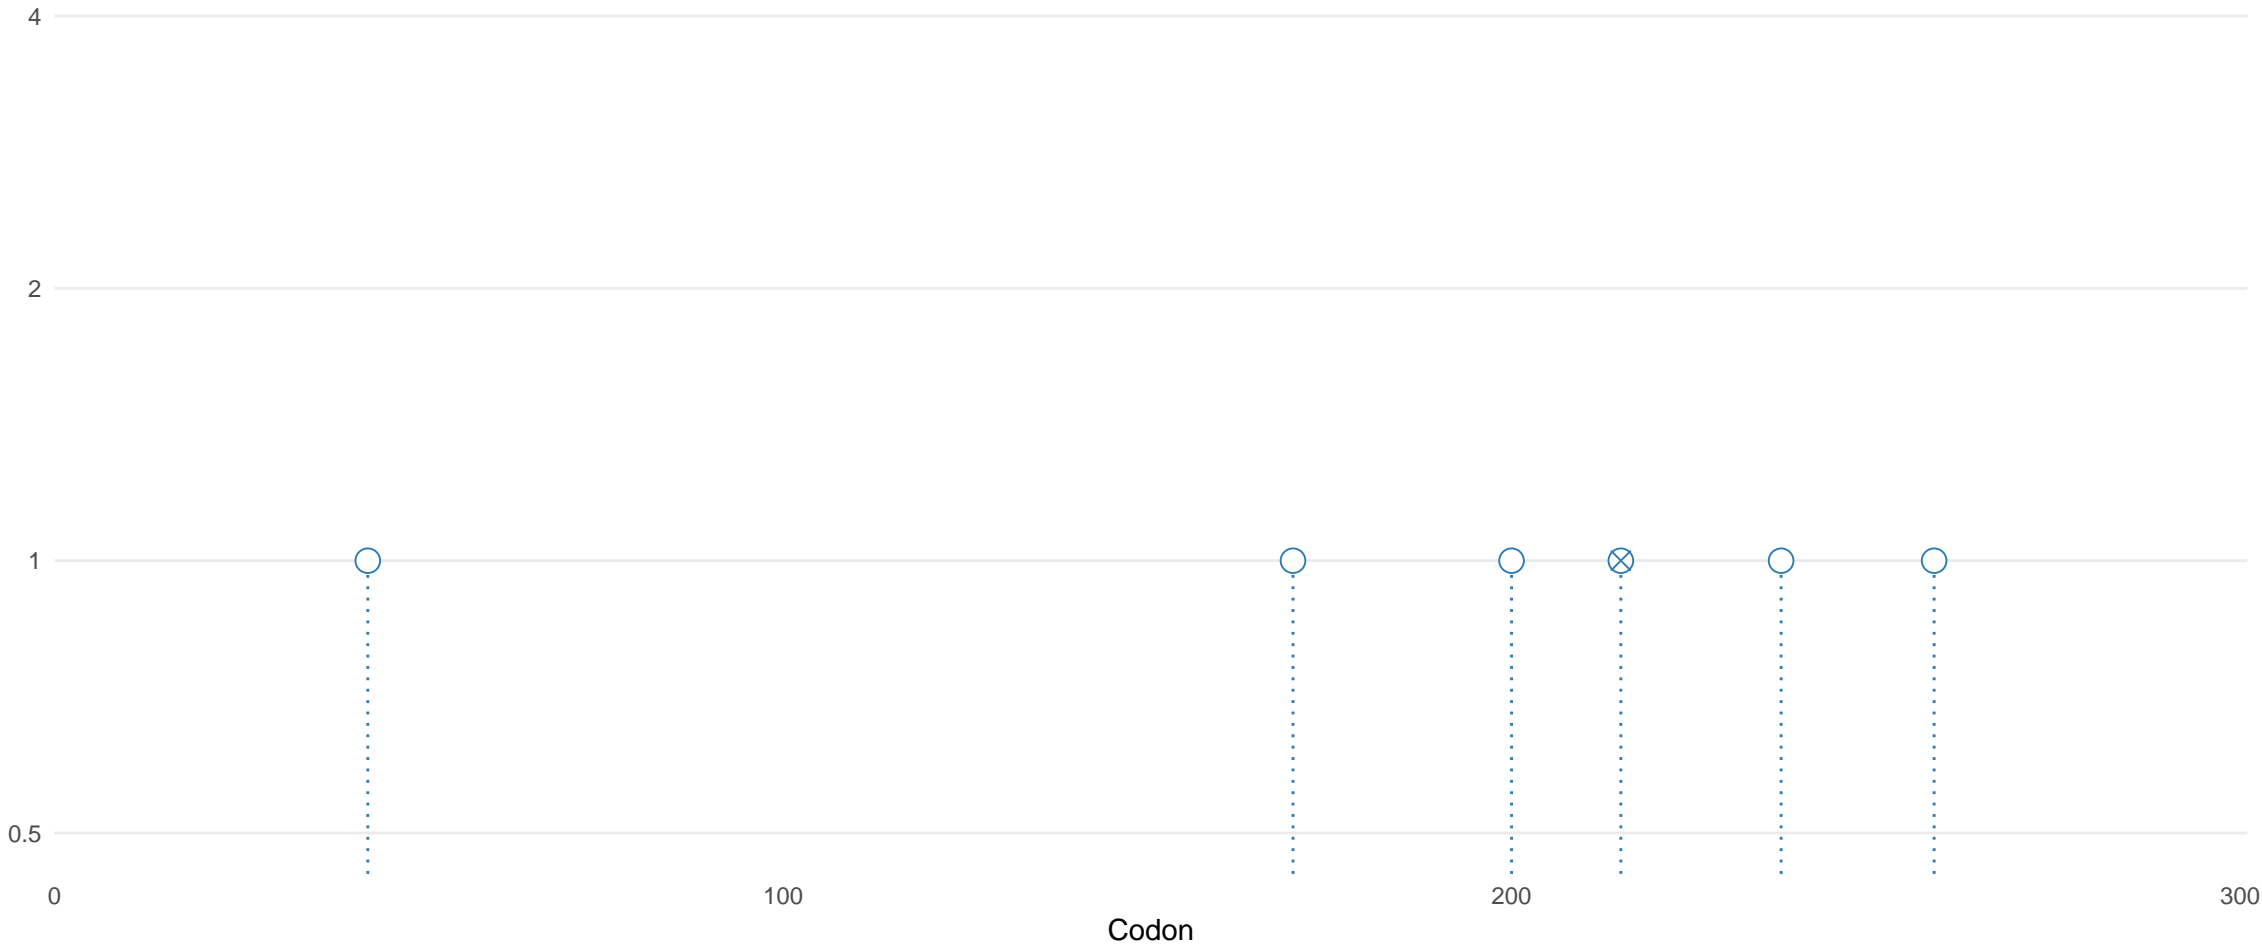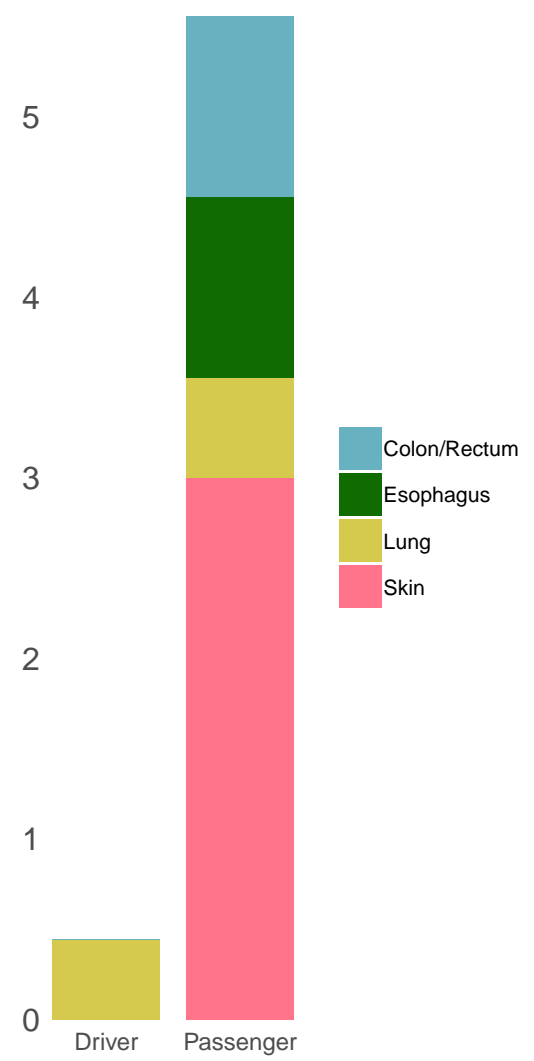

**Monoallelic:** ○ SNV □ MNV ◇ INDEL in frame ⊗ SNV nonsense ⊗ MNV nonsense ⊗ INDEL out of frame  
**Biallelic/Multihit:** ● SNV ■ MNV ◆ INDEL in frame ⊗ SNV nonsense ⊗ MNV nonsense ◆ INDEL out of frame  
**Hotspot:** ●

# SMAD2 Variants

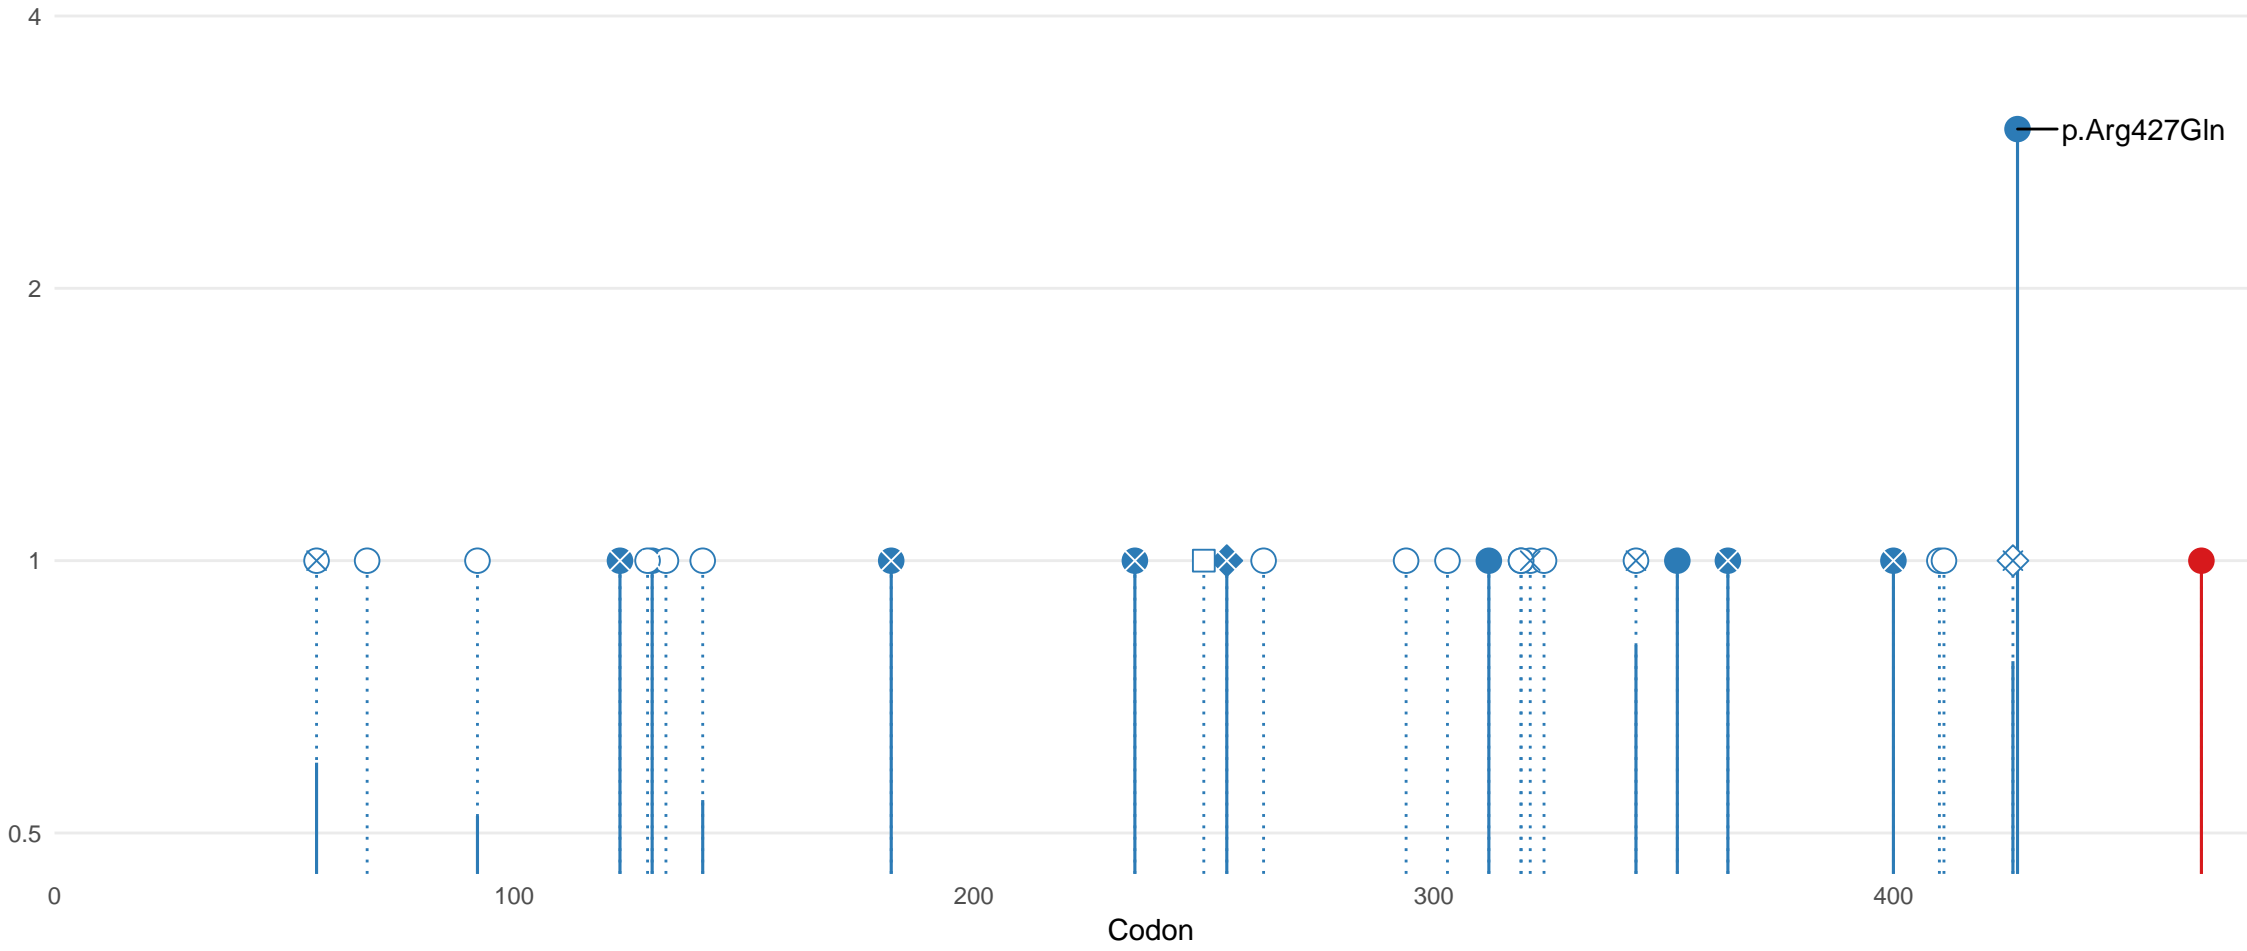

**Monoallelic:** ○ SNV □ MNV ◇ INDEL in frame ⊗ SNV nonsense ⊠ MNV nonsense ⋈ INDEL out of frame  
**Biallelic/Multihit:** ● SNV ■ MNV ◆ INDEL in frame ⊗ SNV nonsense ⊠ MNV nonsense ⋈ INDEL out of frame  
**Hotspot:** ●

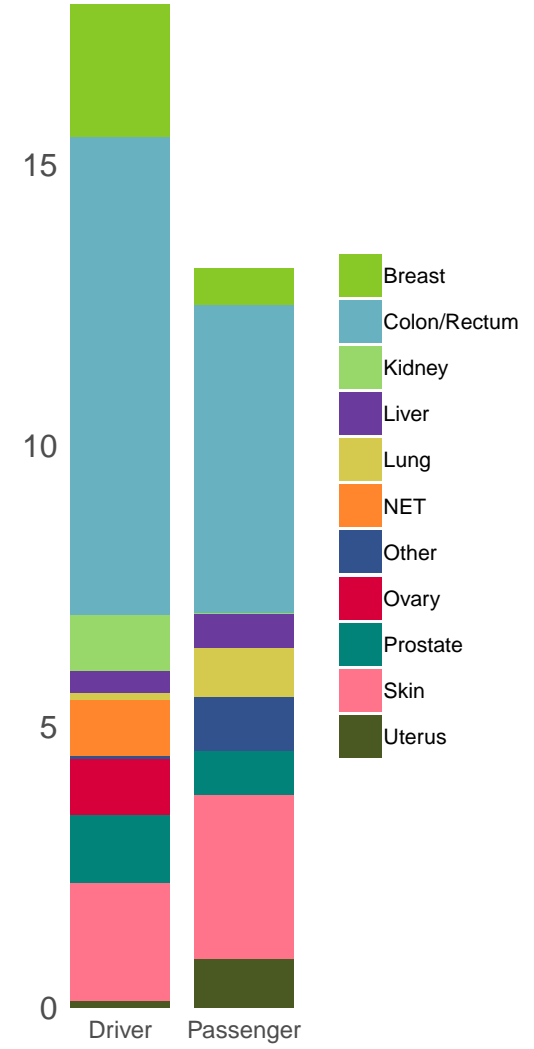

# SMAD3 Variants

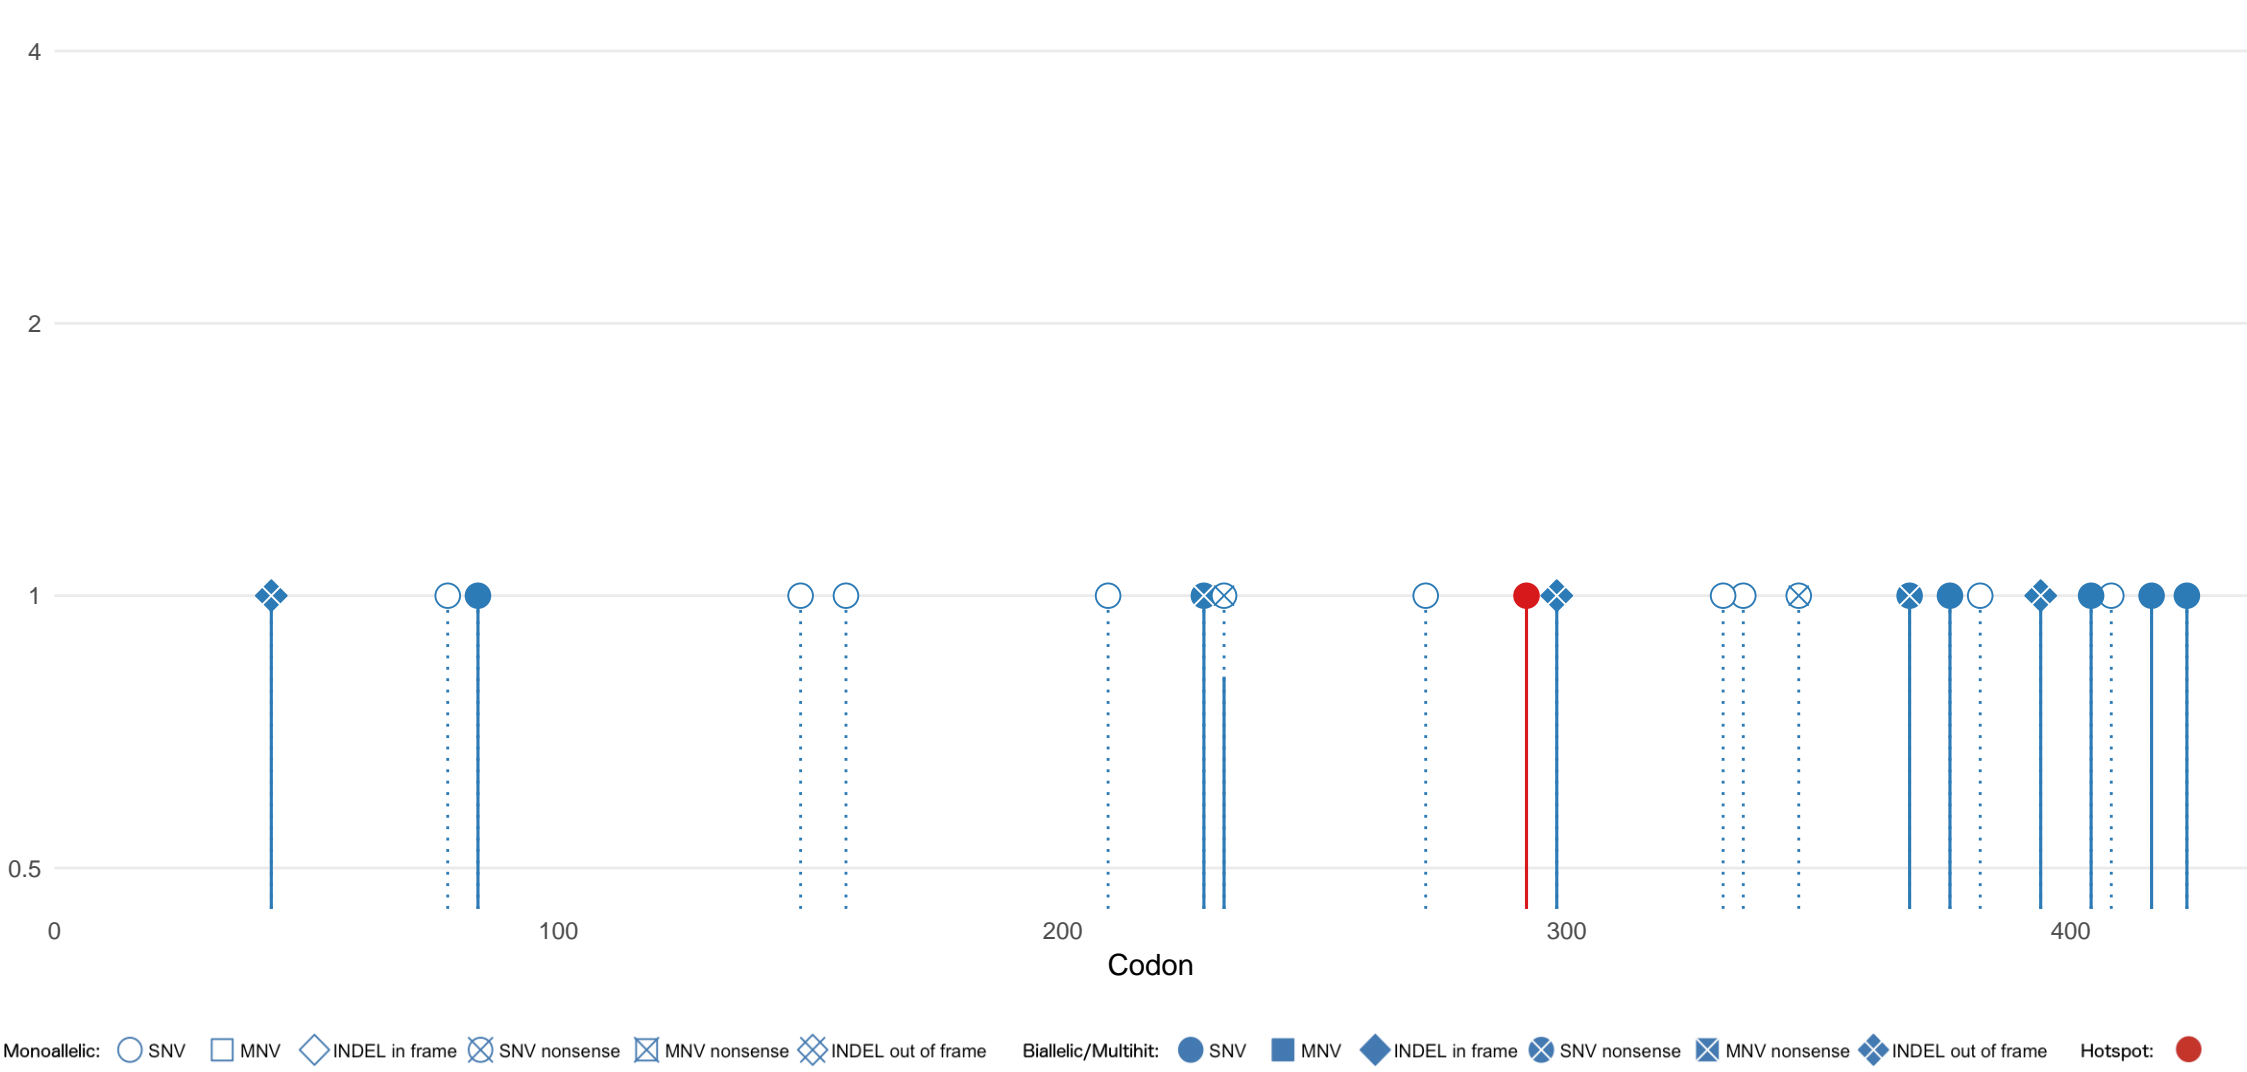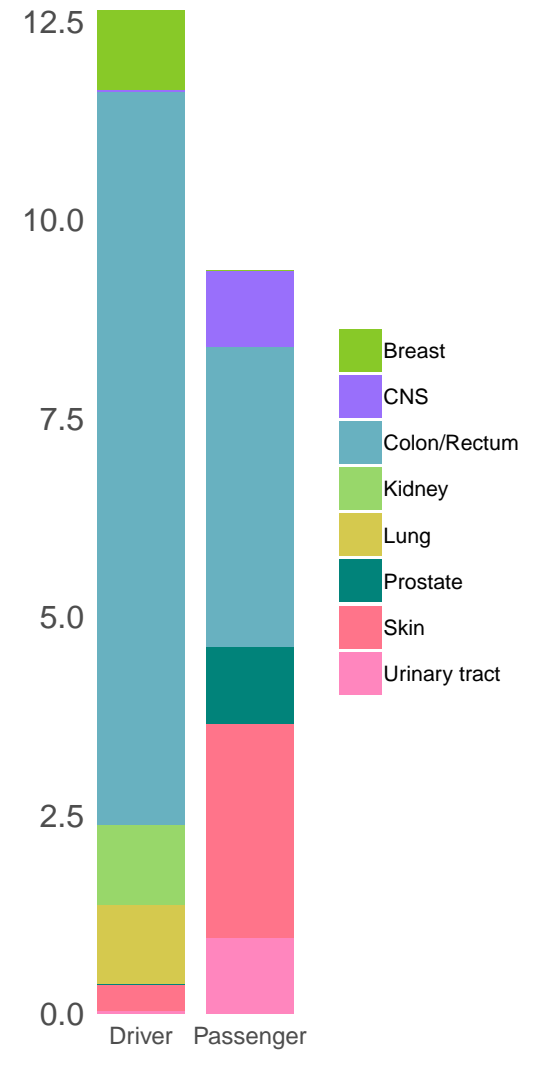



# SMARCA4 Variants

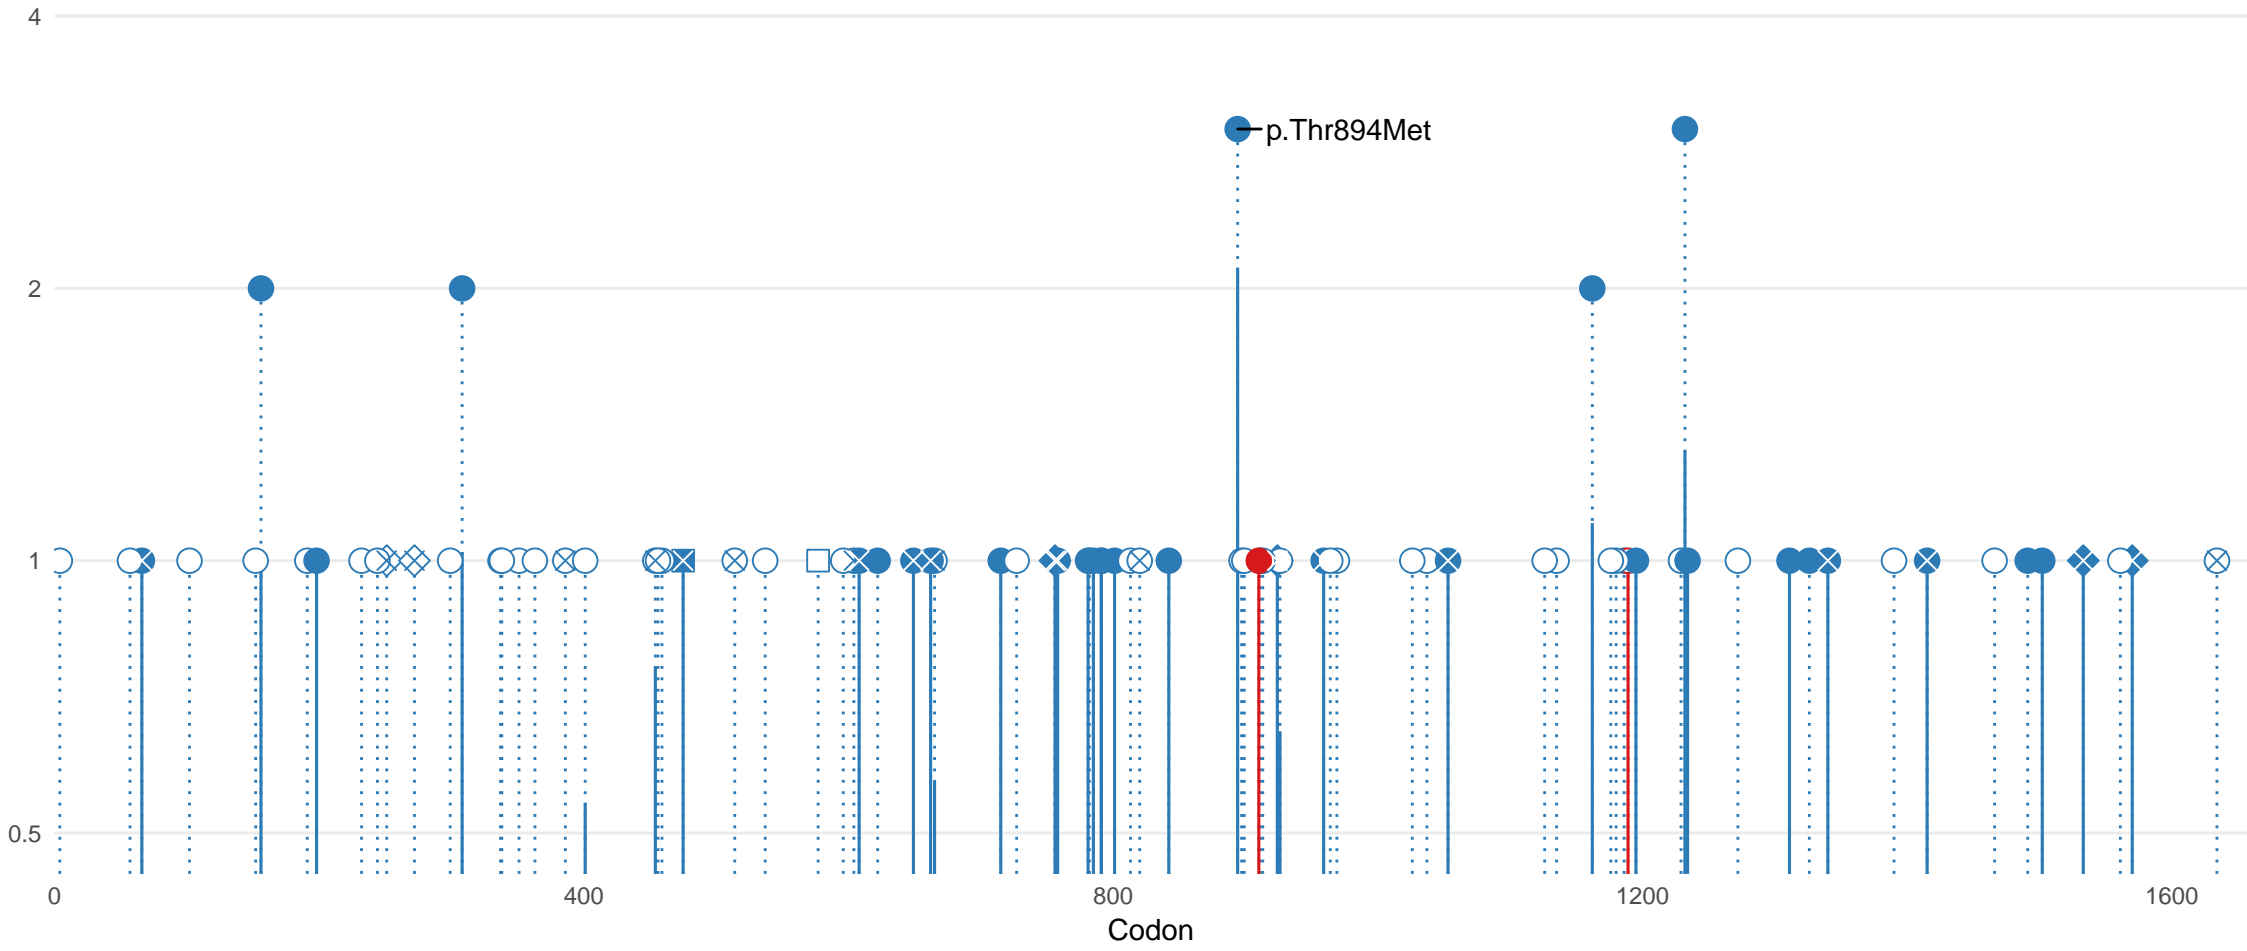

Monoallelic: ○ SNV □ MNV ◇ INDEL in frame ⊗ SNV nonsense ⊗ MNV nonsense ⊗ INDEL out of frame  
 Biallelic/Multihit: ● SNV ■ MNV ◆ INDEL in frame ⊗ SNV nonsense ⊗ MNV nonsense ◆ INDEL out of frame Hotspot: ●

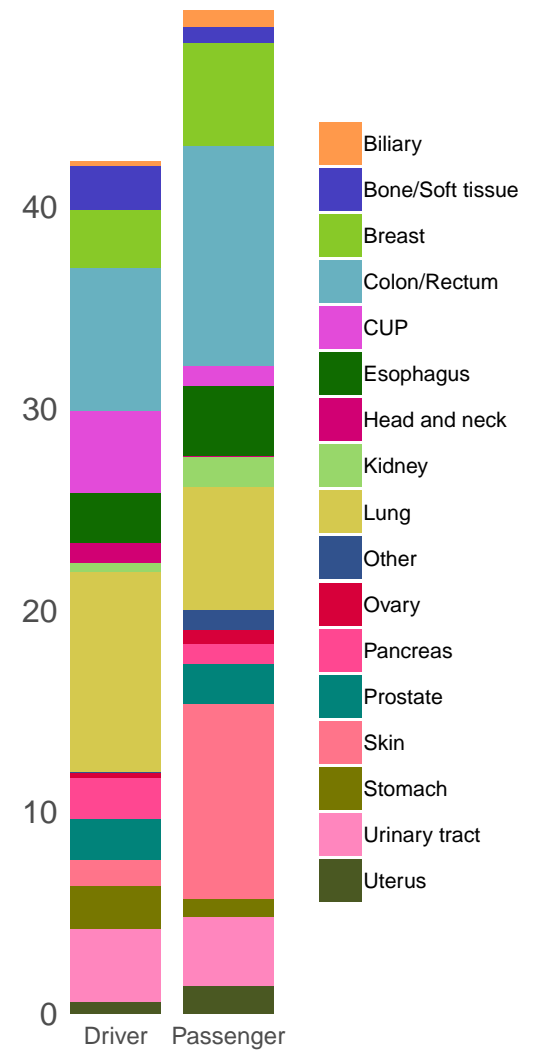

# SMARCB1 Variants

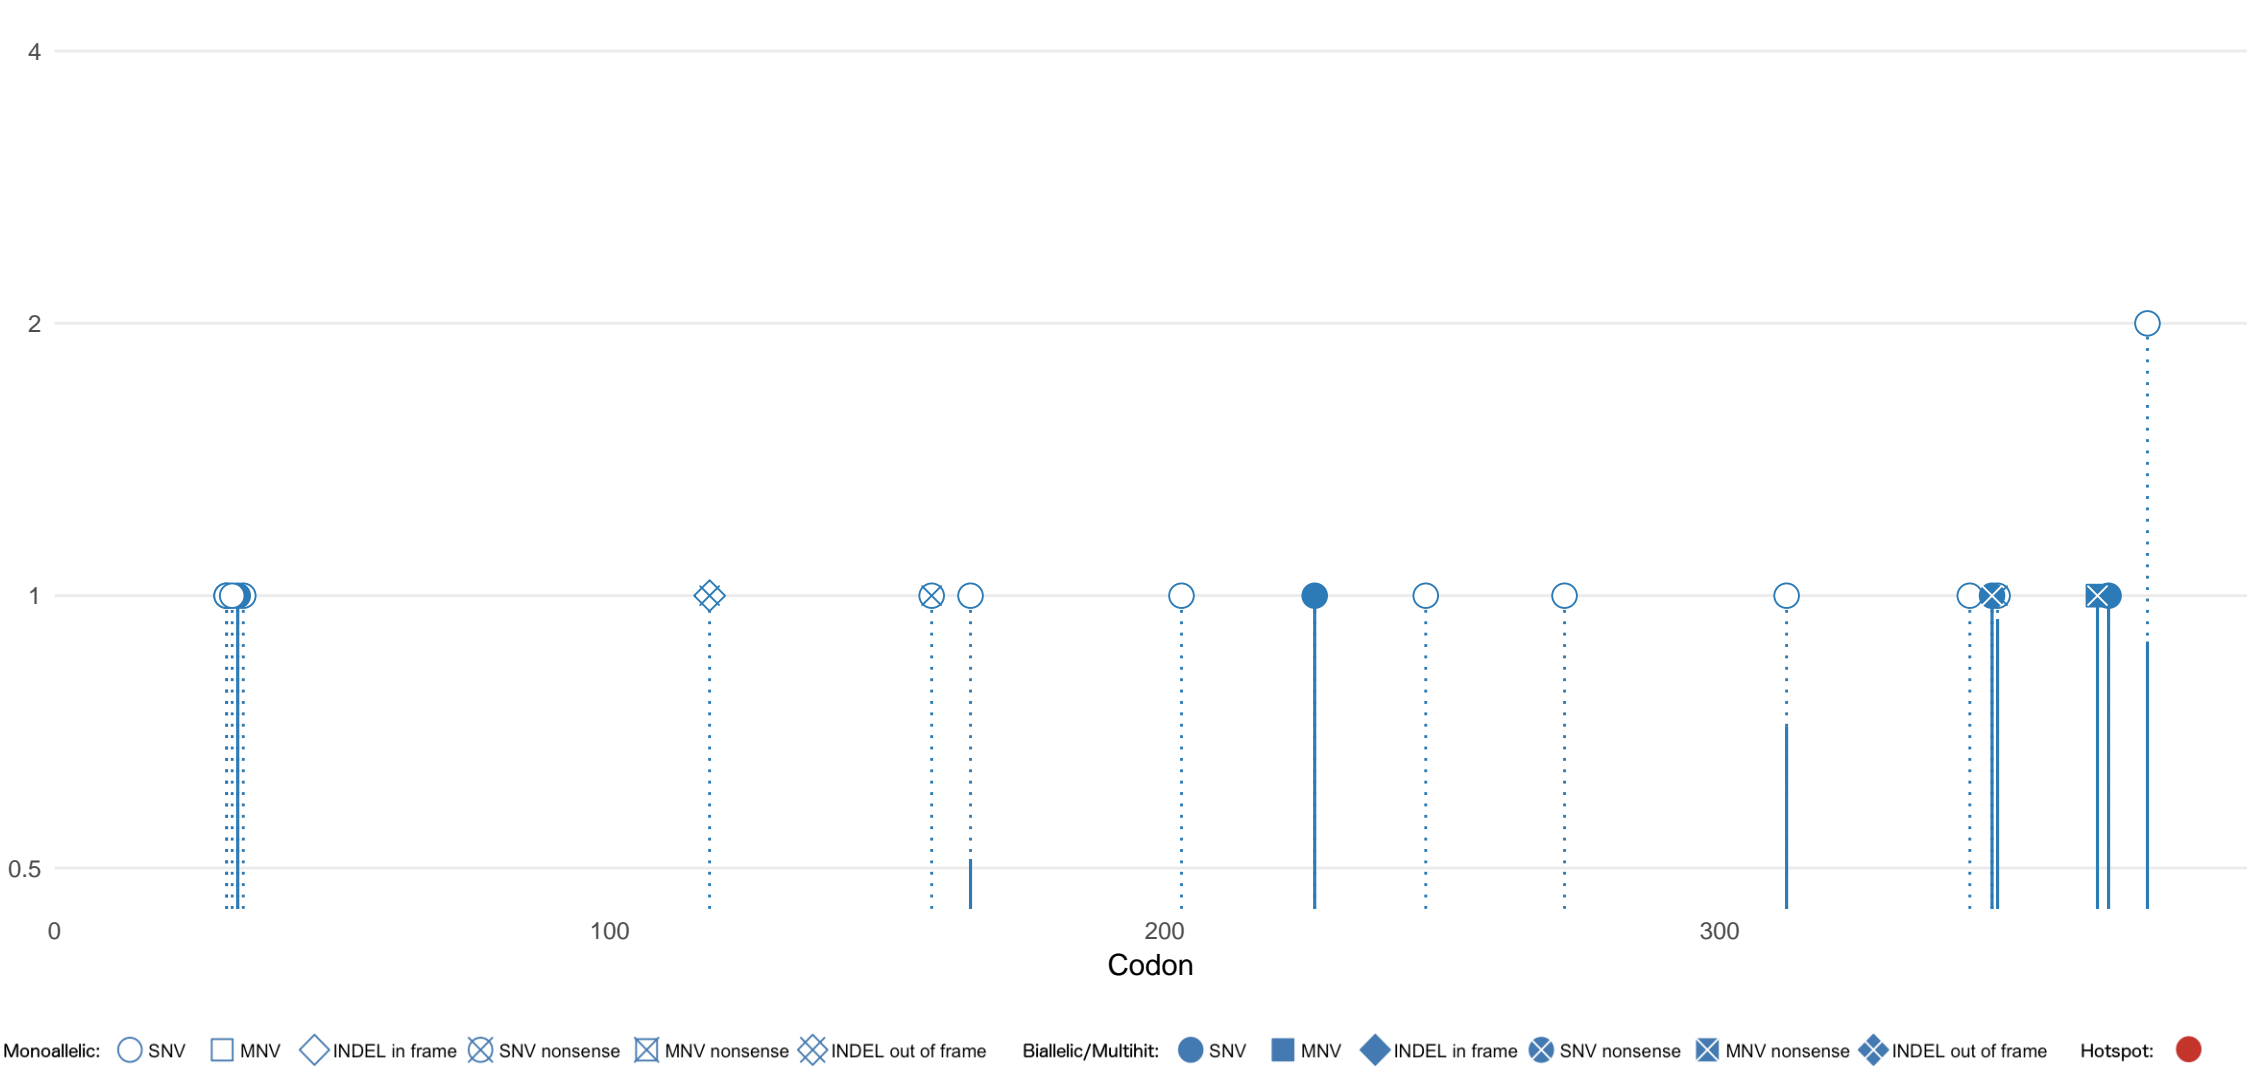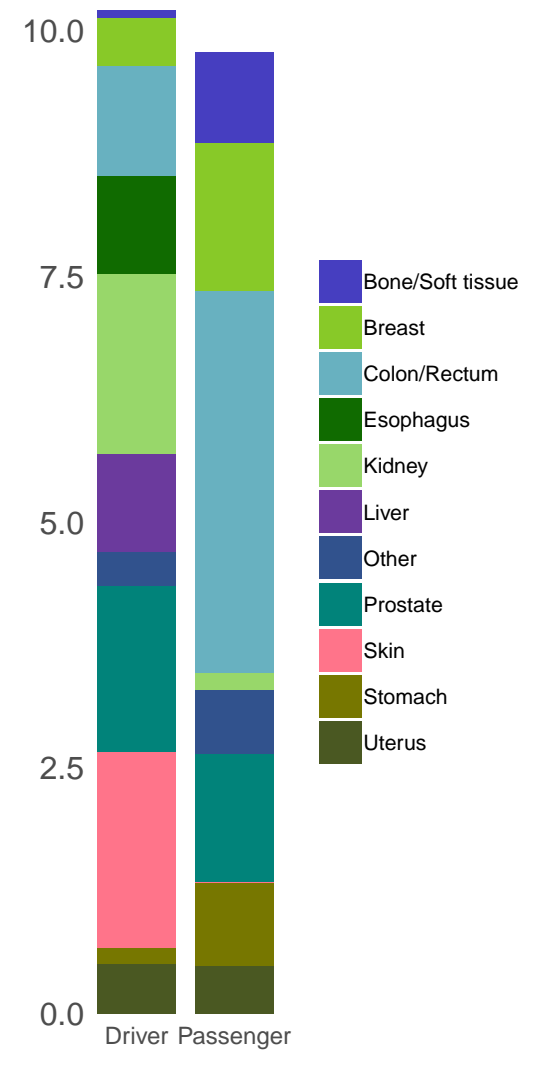



# SMARCD1 Variants

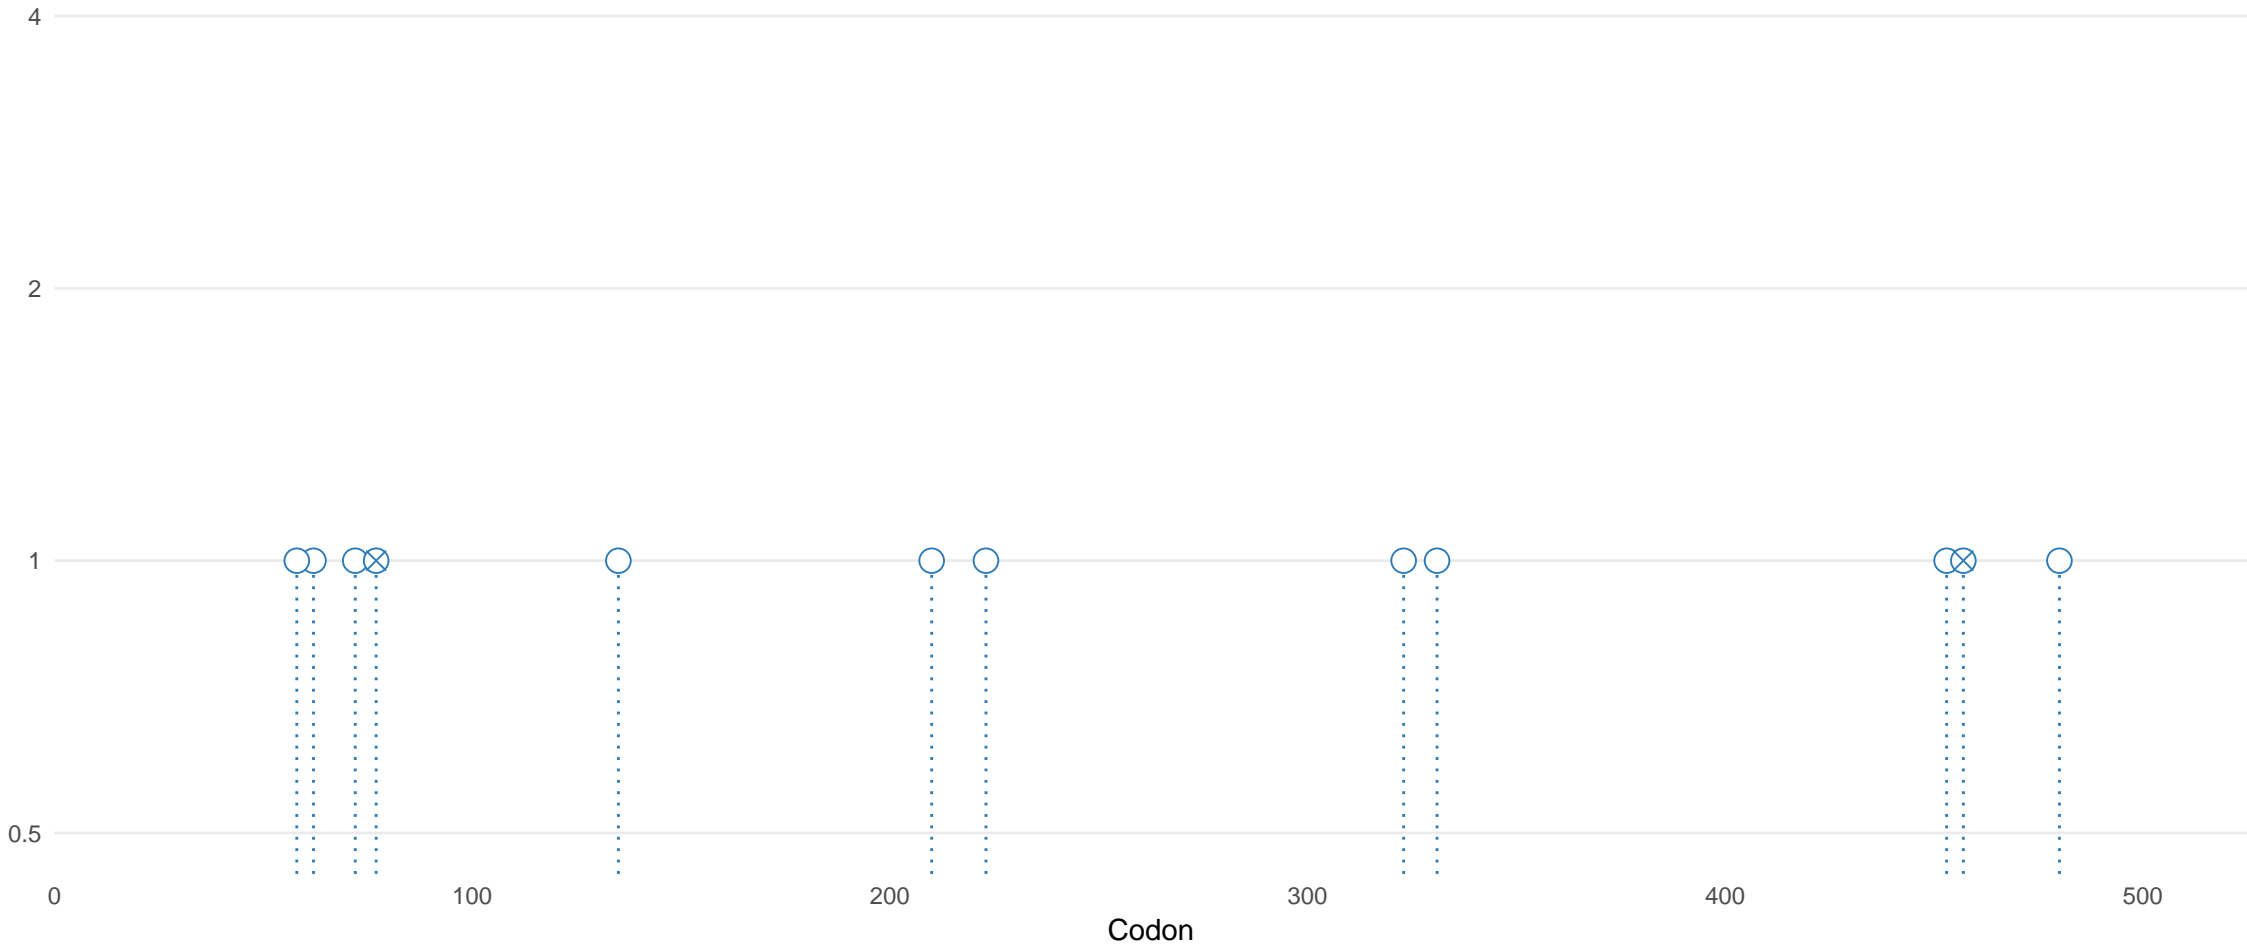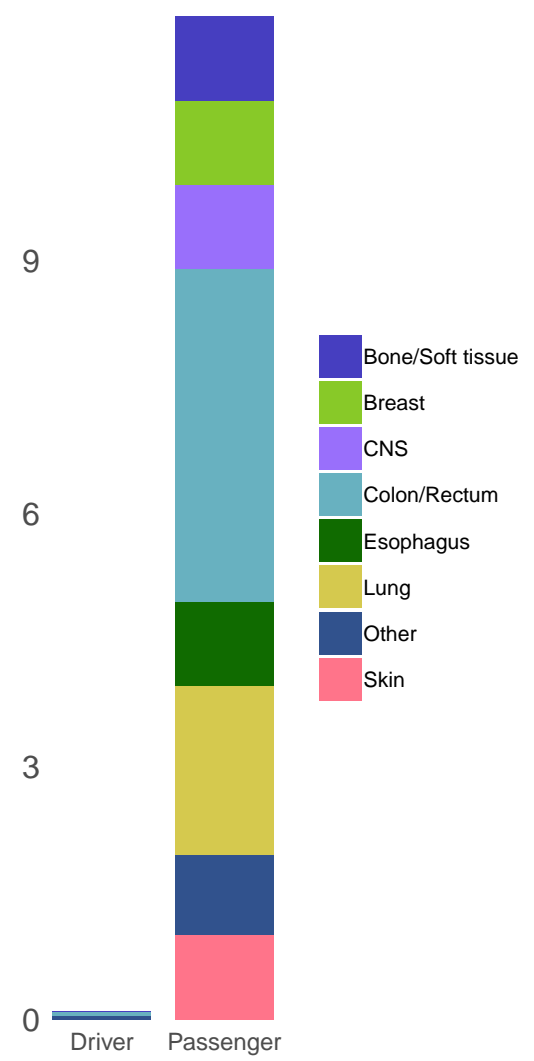

Monoallelic: ○ SNV □ MNV ◇ INDEL in frame ⊗ SNV nonsense ⊗ MNV nonsense ⊗ INDEL out of frame  
 Biallelic/Multihit: ● SNV ■ MNV ◆ INDEL in frame ⊗ SNV nonsense ⊗ MNV nonsense ◆ INDEL out of frame  
 Hotspot: ●

0 Driver Passenger

# SOCS1 Variants

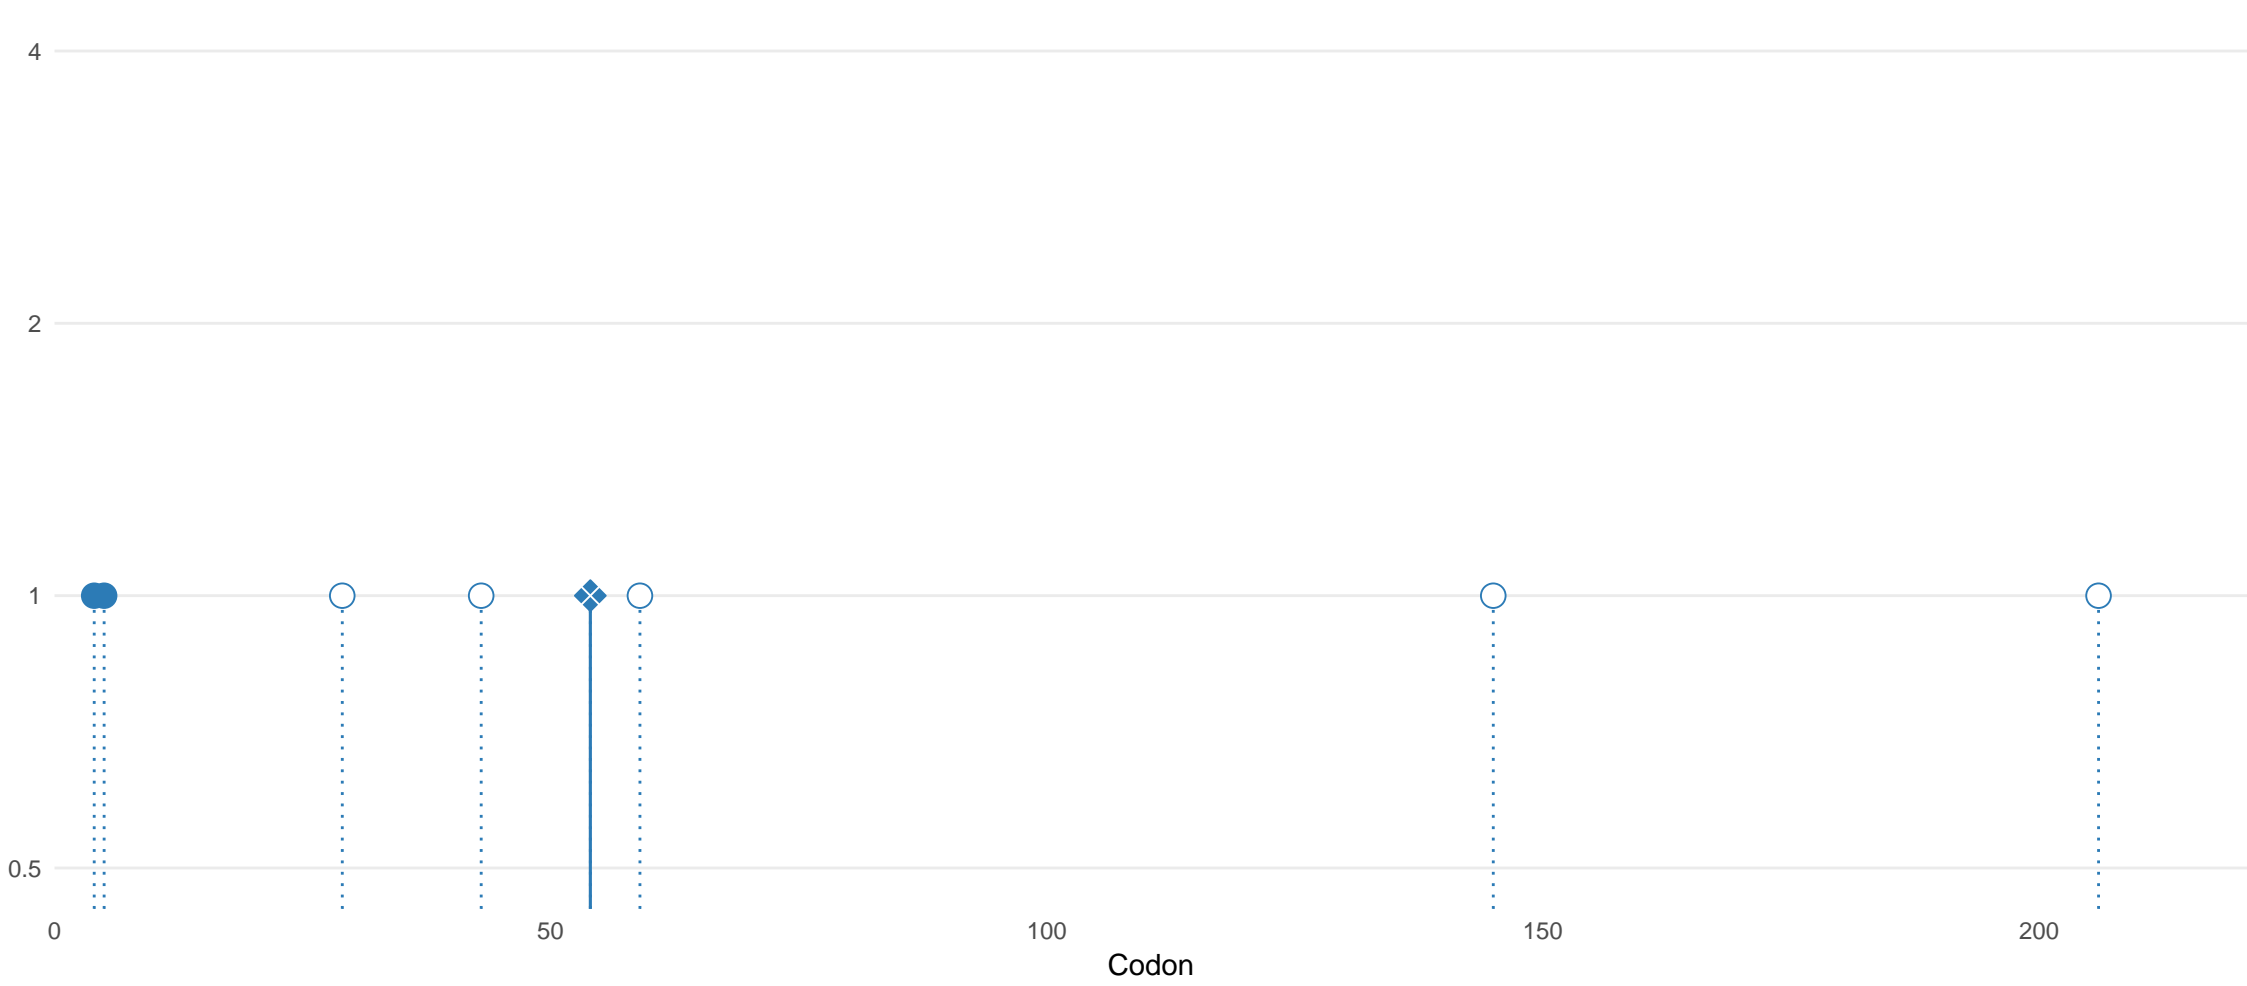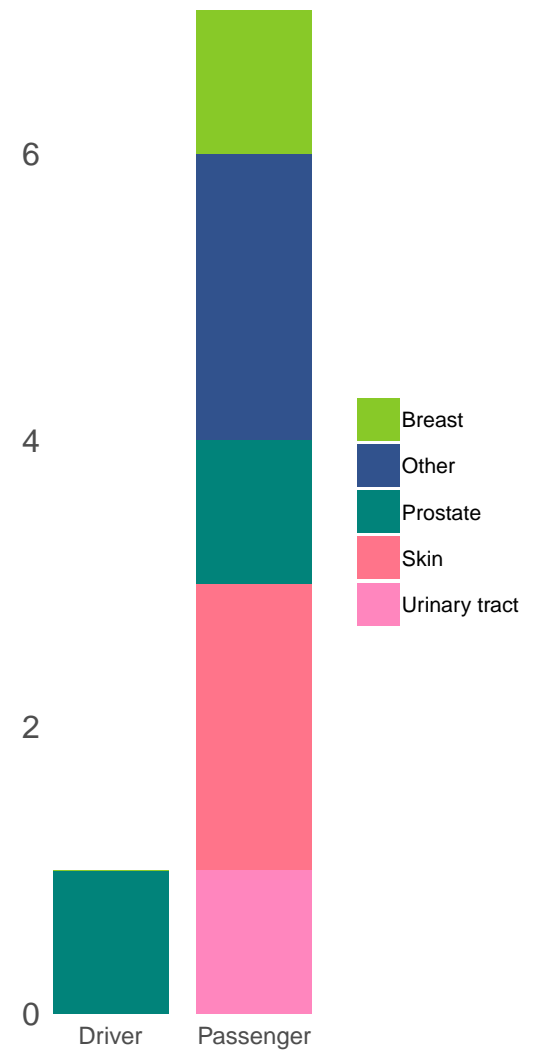

Monoallelic: ○ SNV □ MNV ◇ INDEL in frame ⊗ SNV nonsense ⊗ MNV nonsense ⊗ INDEL out of frame  
 Biallelic/Multihit: ● SNV ■ MNV ◆ INDEL in frame ⊗ SNV nonsense ⊗ MNV nonsense ◆ INDEL out of frame  
 Hotspot: ●

# SOX9 Variants

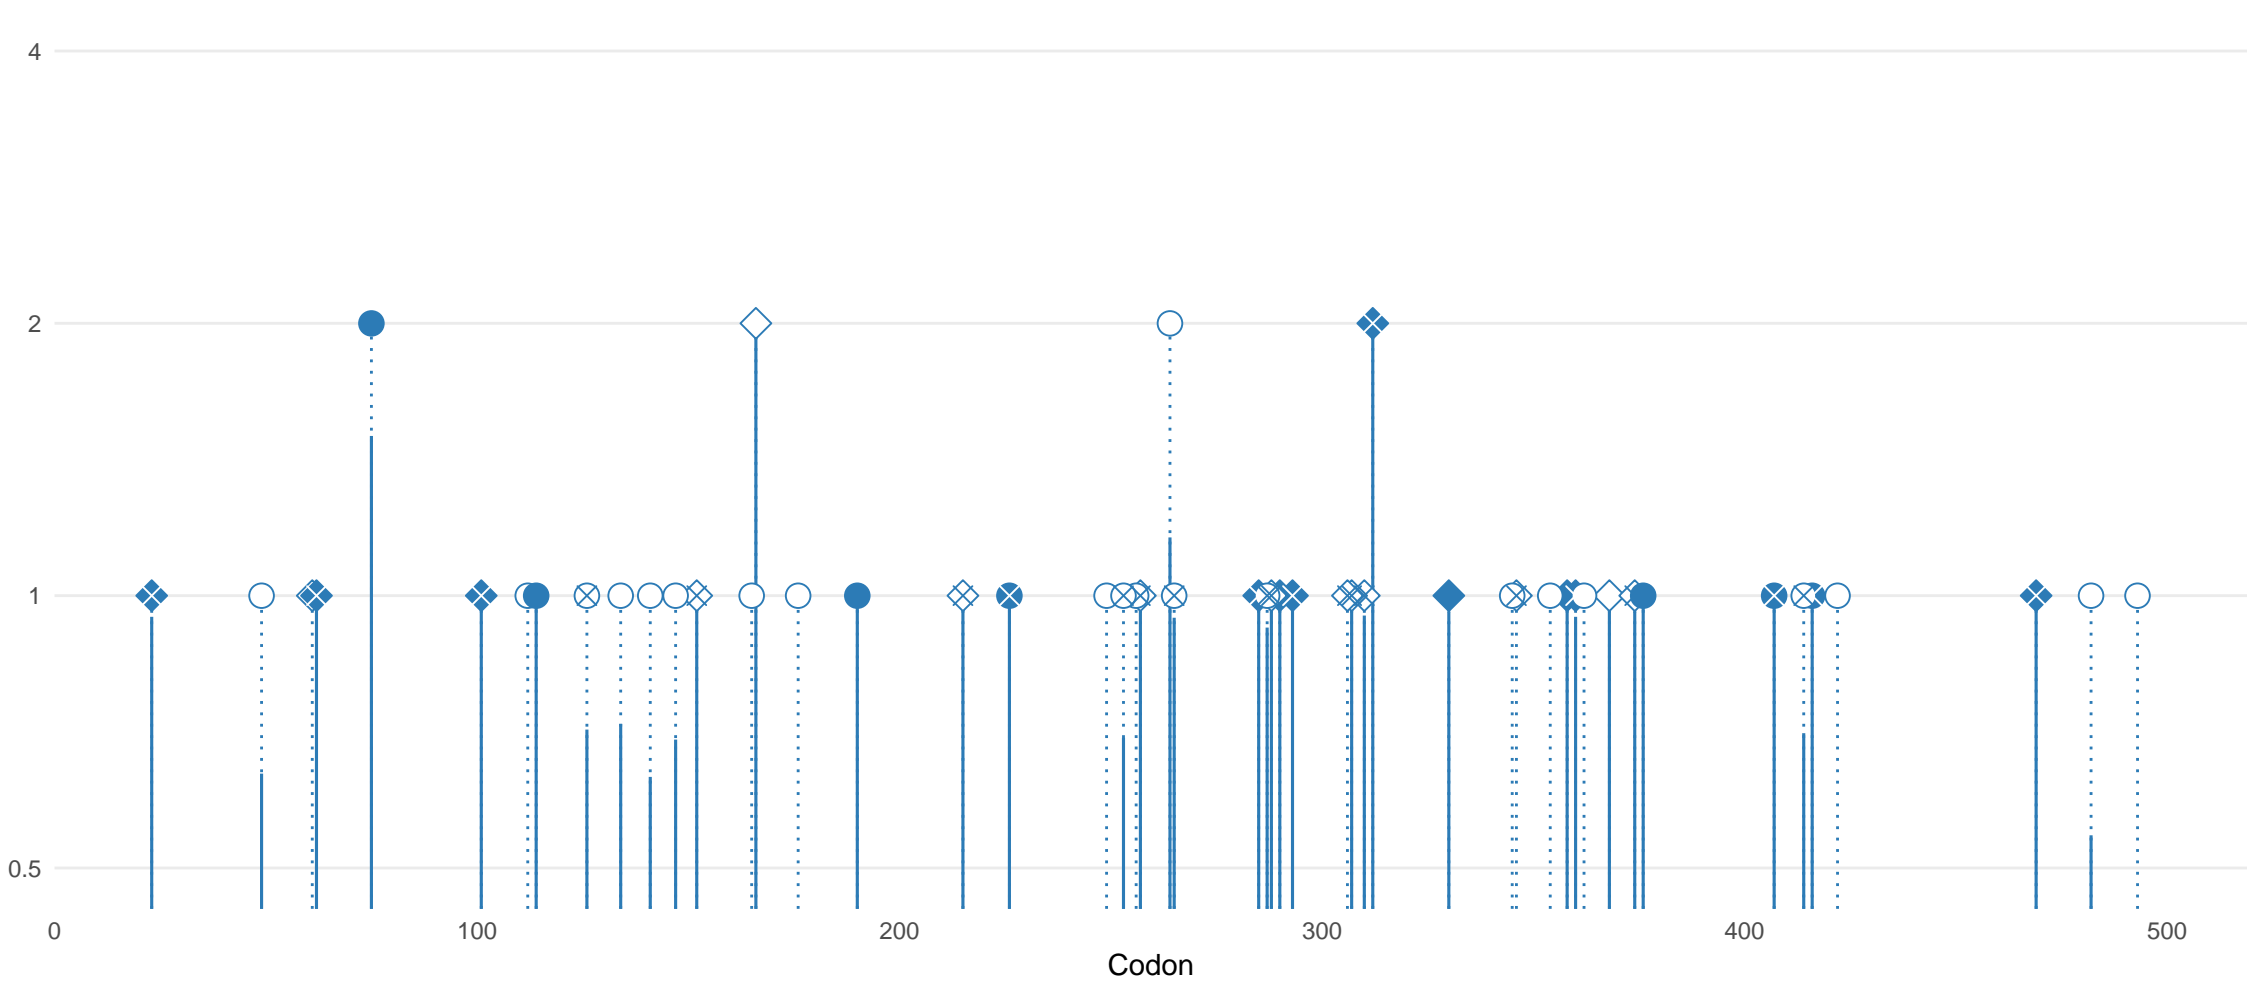

**Monoallelic:** ○ SNV □ MNV ◇ INDEL in frame ⊗ SNV nonsense ⊗ MNV nonsense ⊗ INDEL out of frame  
**Biallelic/Multi-hit:** ● SNV ■ MNV ◆ INDEL in frame ⊗ SNV nonsense ⊗ MNV nonsense ◆ INDEL out of frame  
**Hotspot:** ●

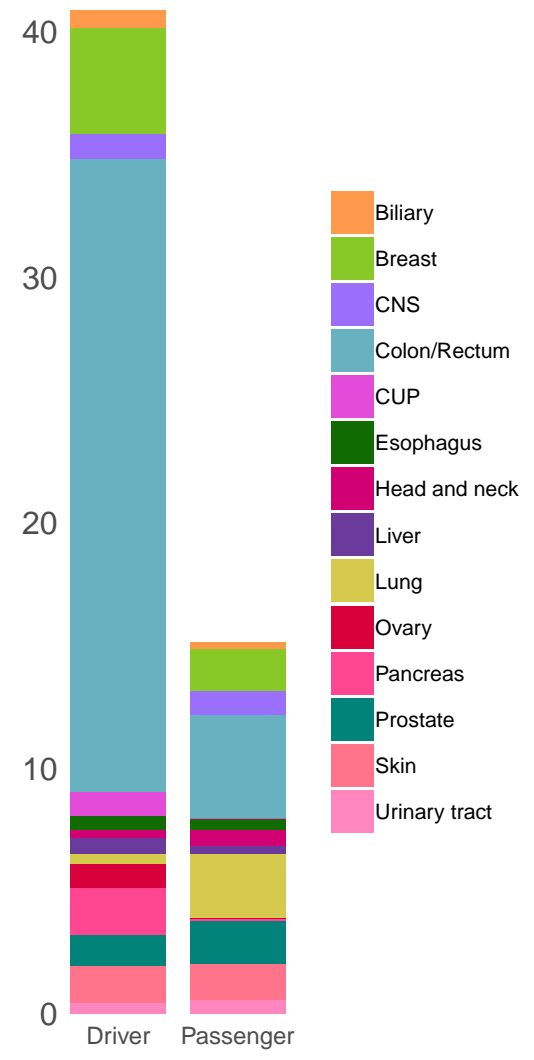

# SPEN Variants

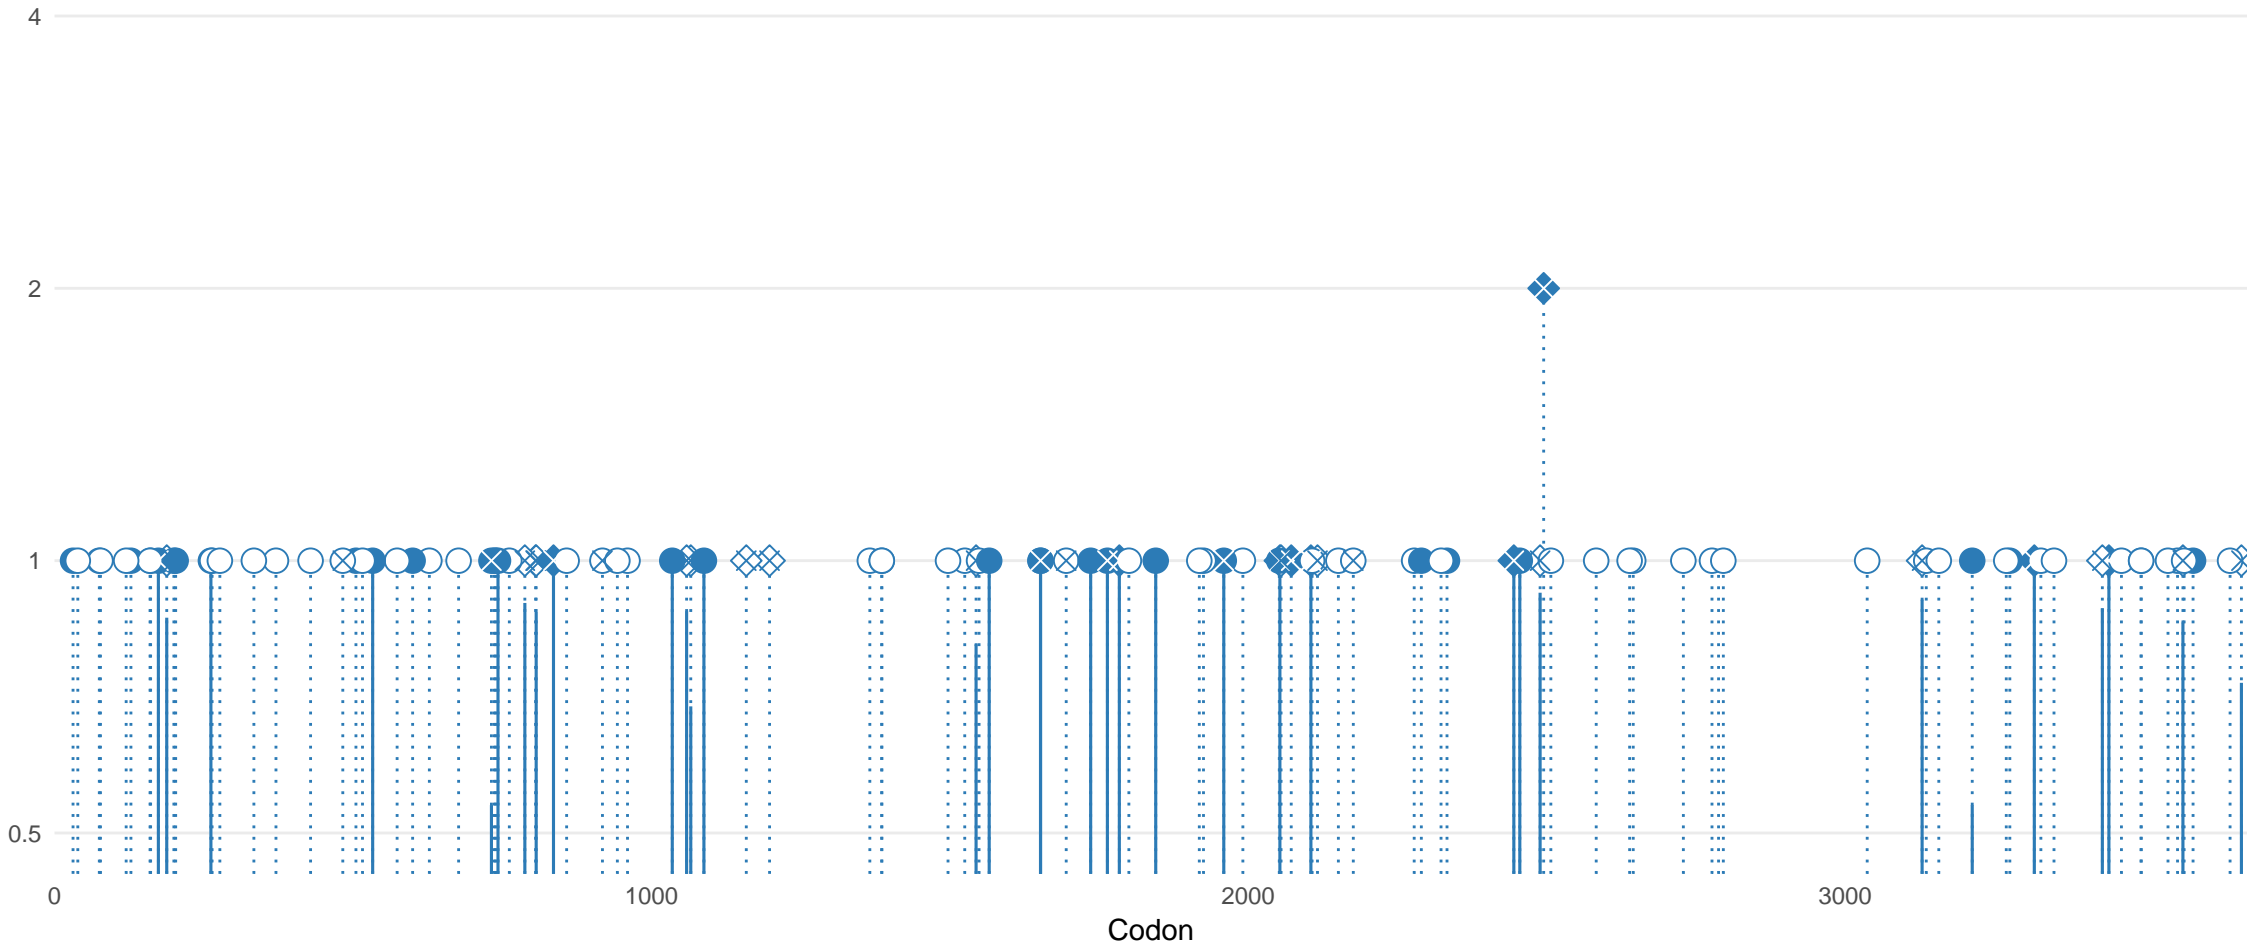

**Monoallelic:** ○ SNV □ MNV ◇ INDEL in frame ⊗ SNV nonsense ⊗ MNV nonsense ⊗ INDEL out of frame  
**Biallelic/Multihit:** ● SNV ■ MNV ◆ INDEL in frame ⊗ SNV nonsense ⊗ MNV nonsense ◆ INDEL out of frame  
**Hotspot:** ●

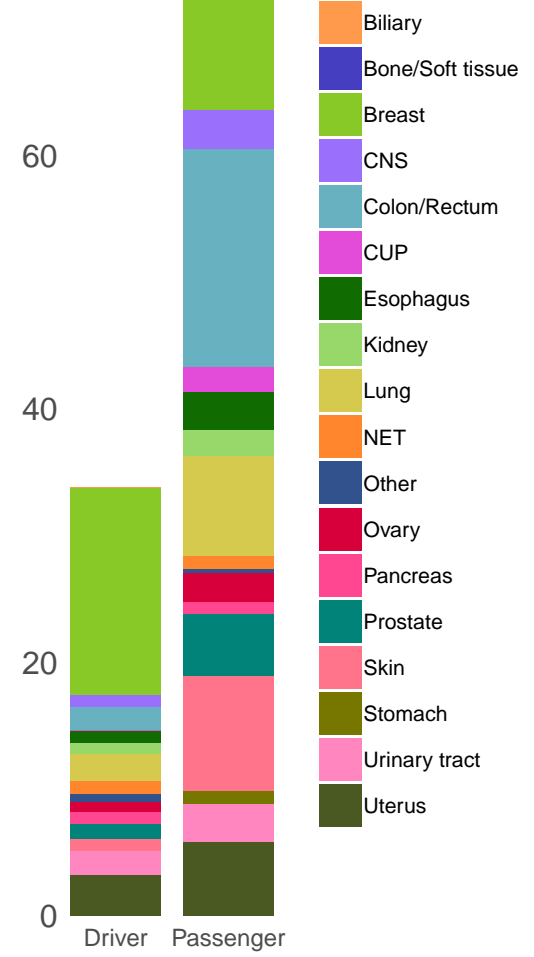

# STAG2 Variants

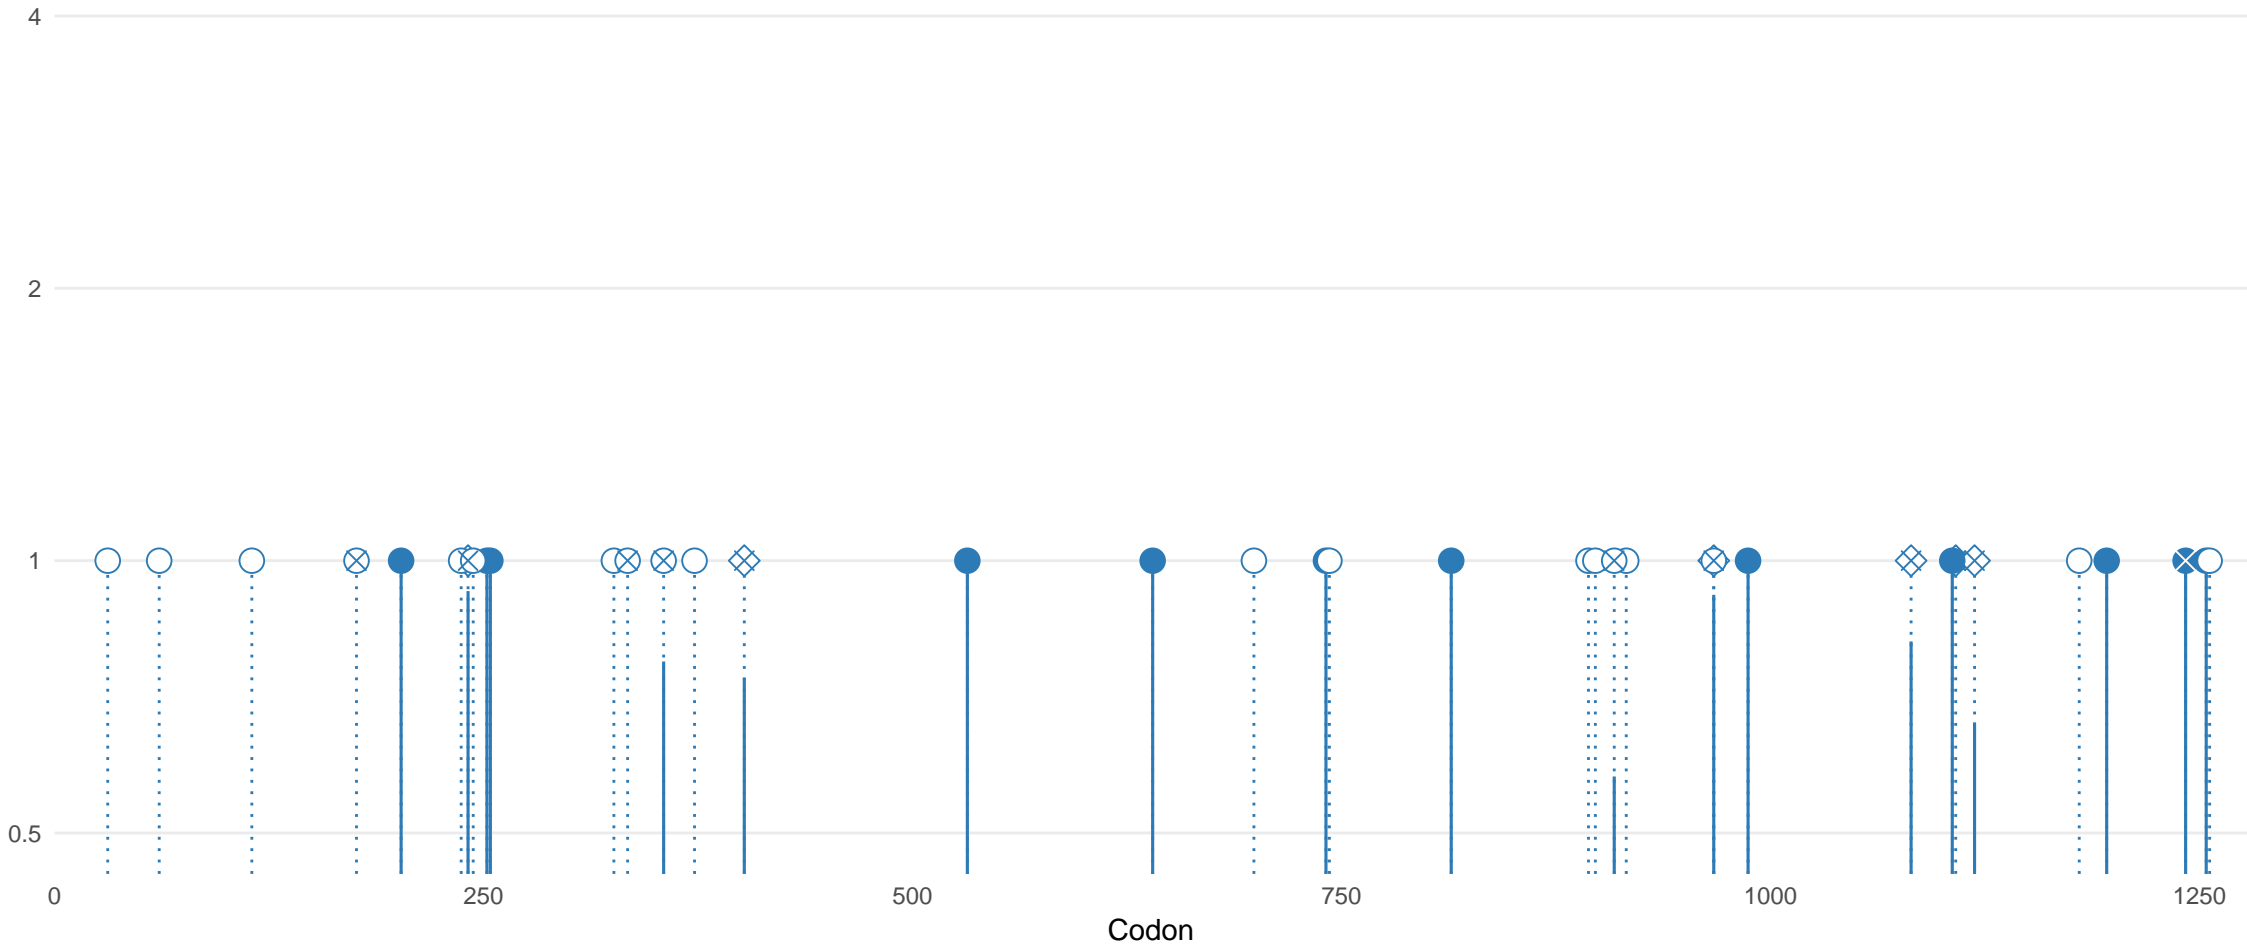

**Monoallelic:** ○ SNV □ MNV ◇ INDEL in frame ⊗ SNV nonsense ⊗ MNV nonsense ⊗ INDEL out of frame  
**Biallelic/Multihit:** ● SNV ■ MNV ◆ INDEL in frame ⊗ SNV nonsense ⊗ MNV nonsense ◆ INDEL out of frame  
**Hotspot:** ●

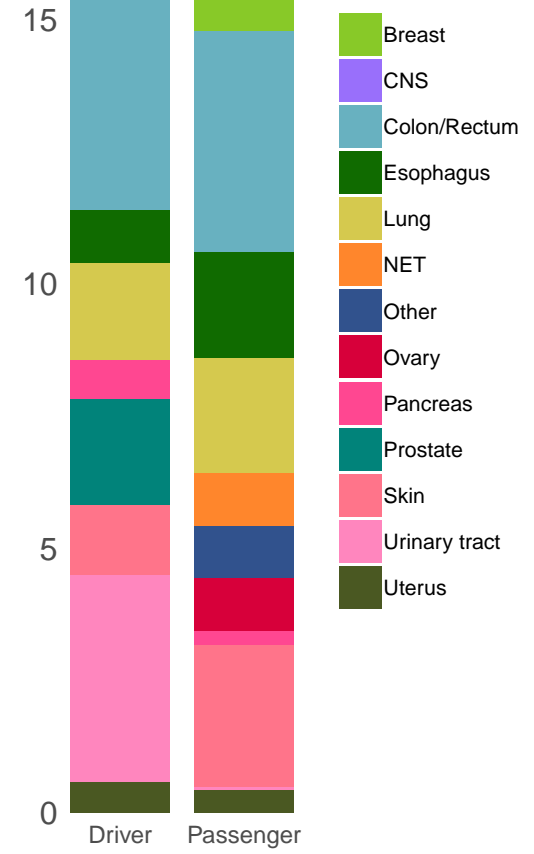

# STK11 Variants

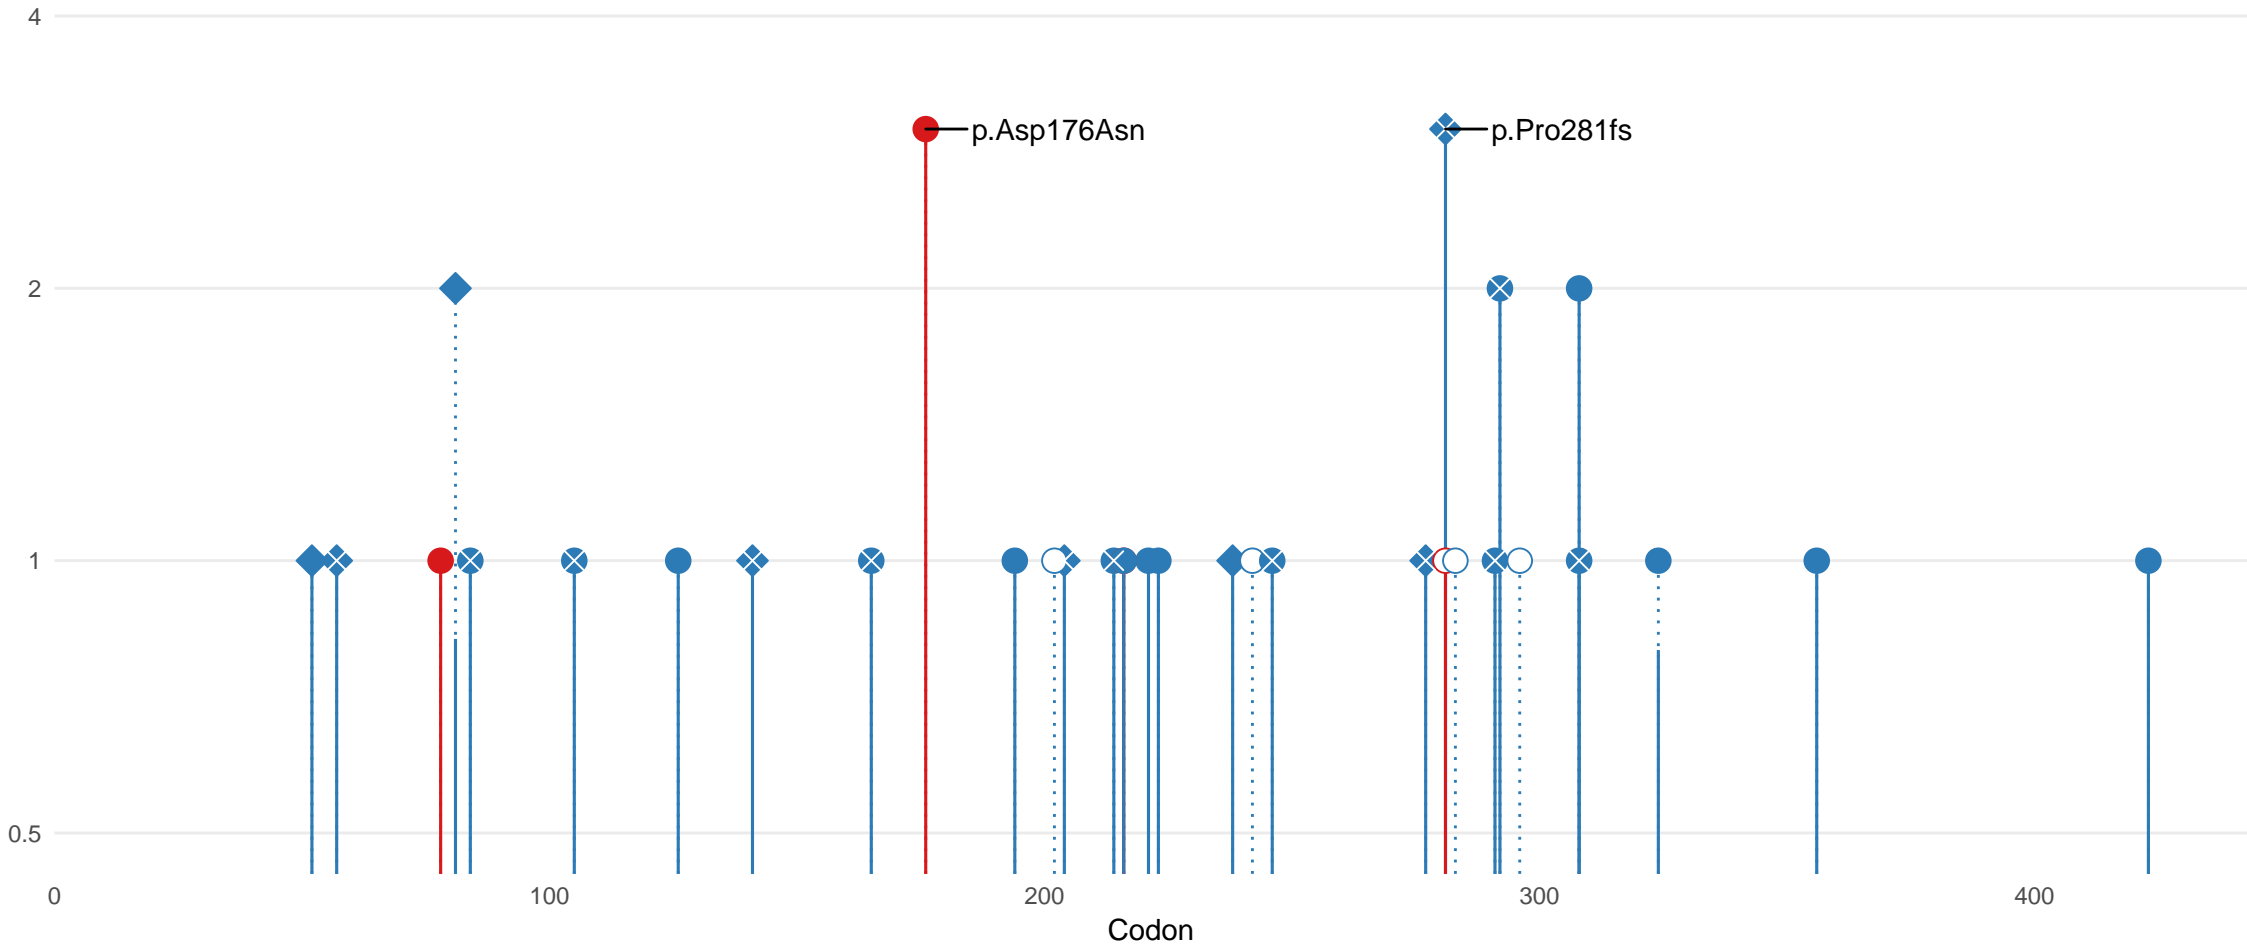

**Monoallelic:** ○ SNV □ MNV ◇ INDEL in frame ⊗ SNV nonsense ⊗ MNV nonsense ⊗ INDEL out of frame  
**Biallelic/Multihit:** ● SNV ■ MNV ◆ INDEL in frame ⊗ SNV nonsense ⊗ MNV nonsense ◆ INDEL out of frame  
**Hotspot:** ●

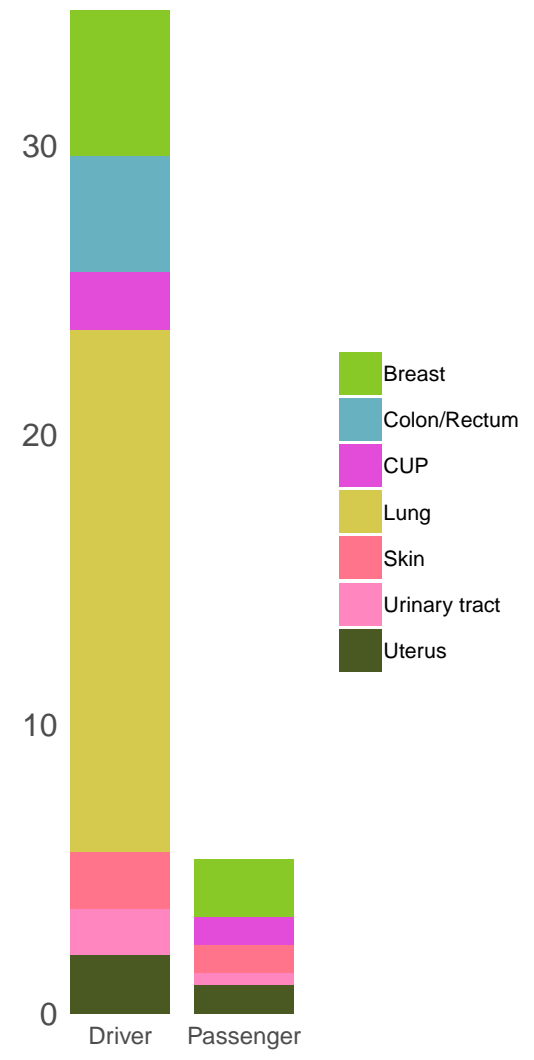

# SUFU Variants

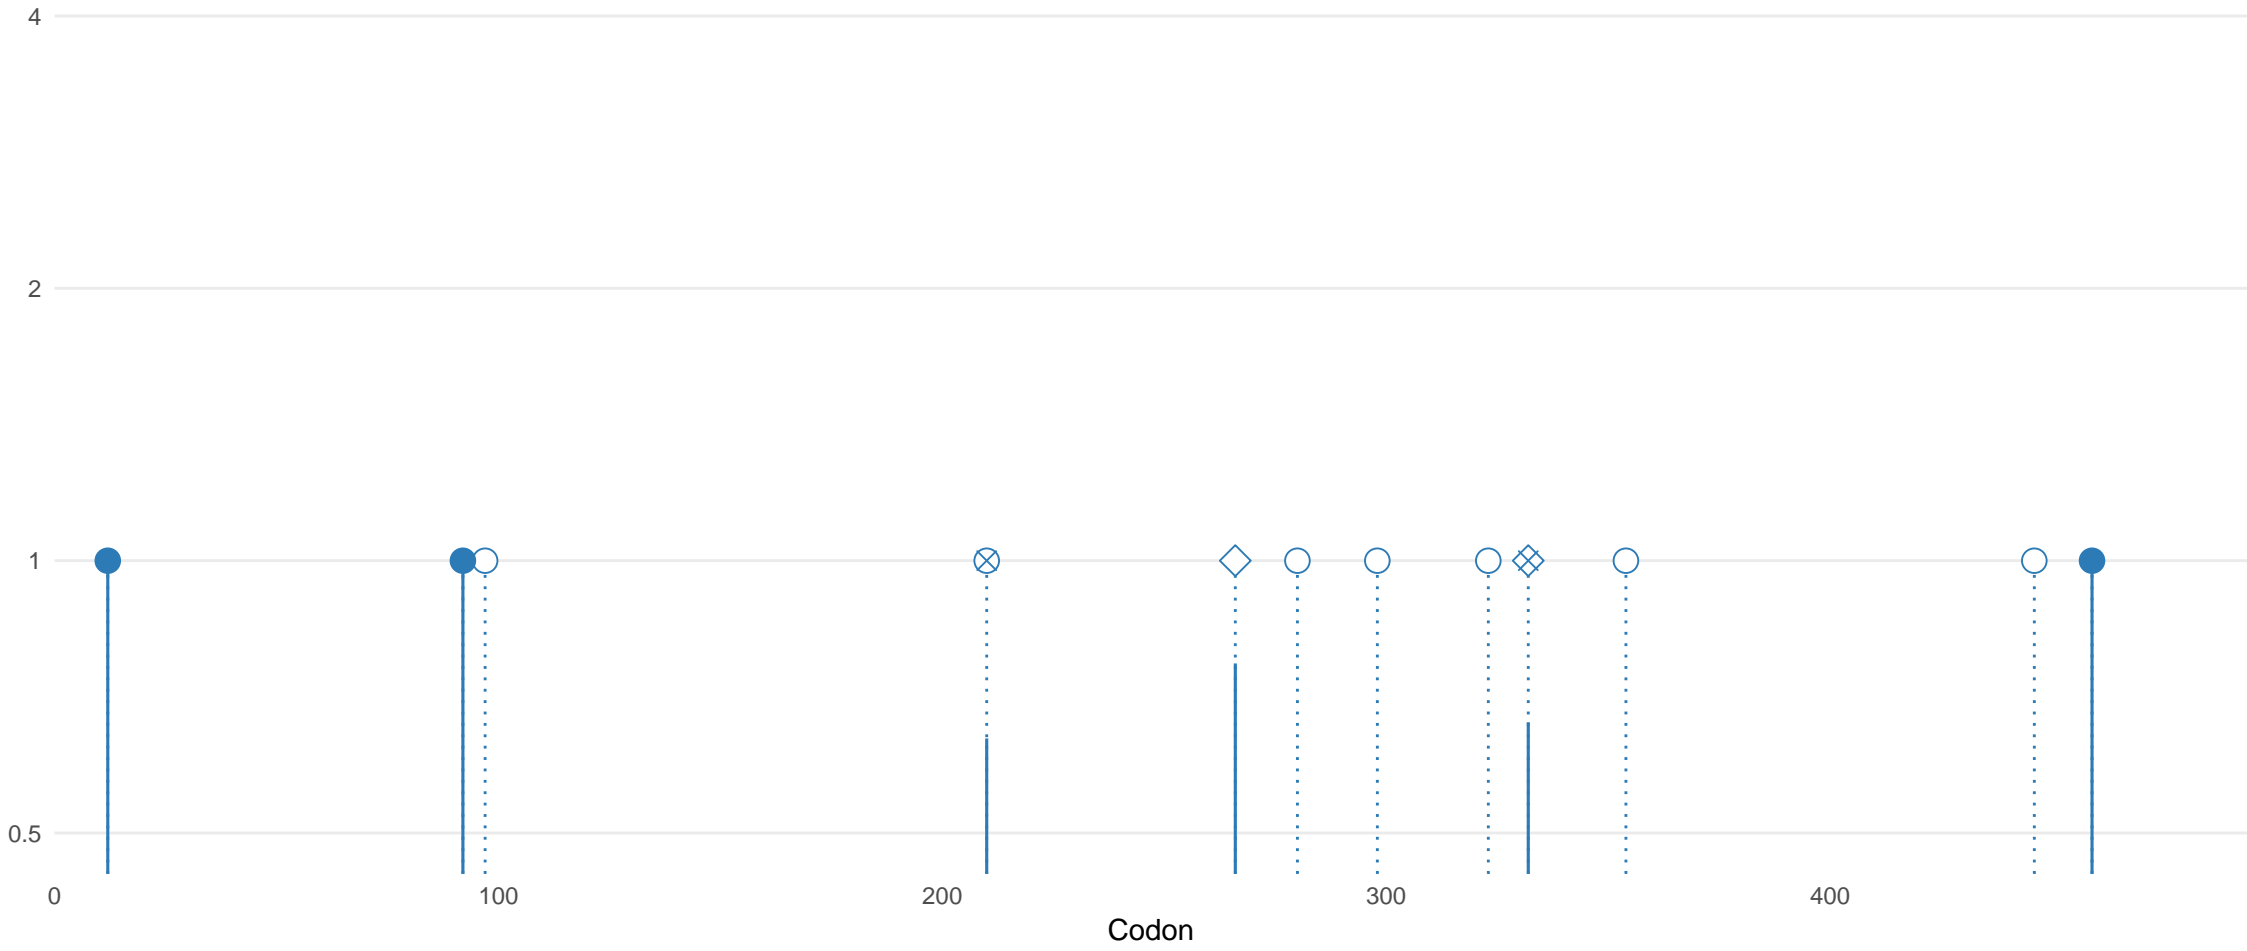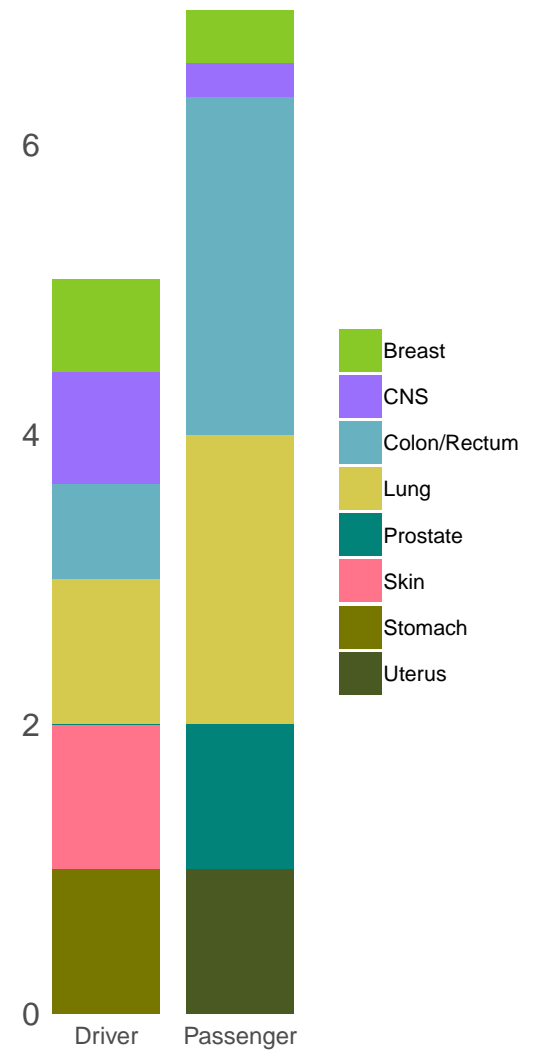

**Monoallelic:** ○ SNV   □ MNV   ◇ INDEL in frame   ⊗ SNV nonsense   ⊗ MNV nonsense   ⊗ INDEL out of frame  
 **Biallelic/Multi-hit:** ● SNV   ■ MNV   ◆ INDEL in frame   ⊗ SNV nonsense   ⊗ MNV nonsense   ◆ INDEL out of frame  
 **Hotspot:** ●

# TBL1XR1 Variants

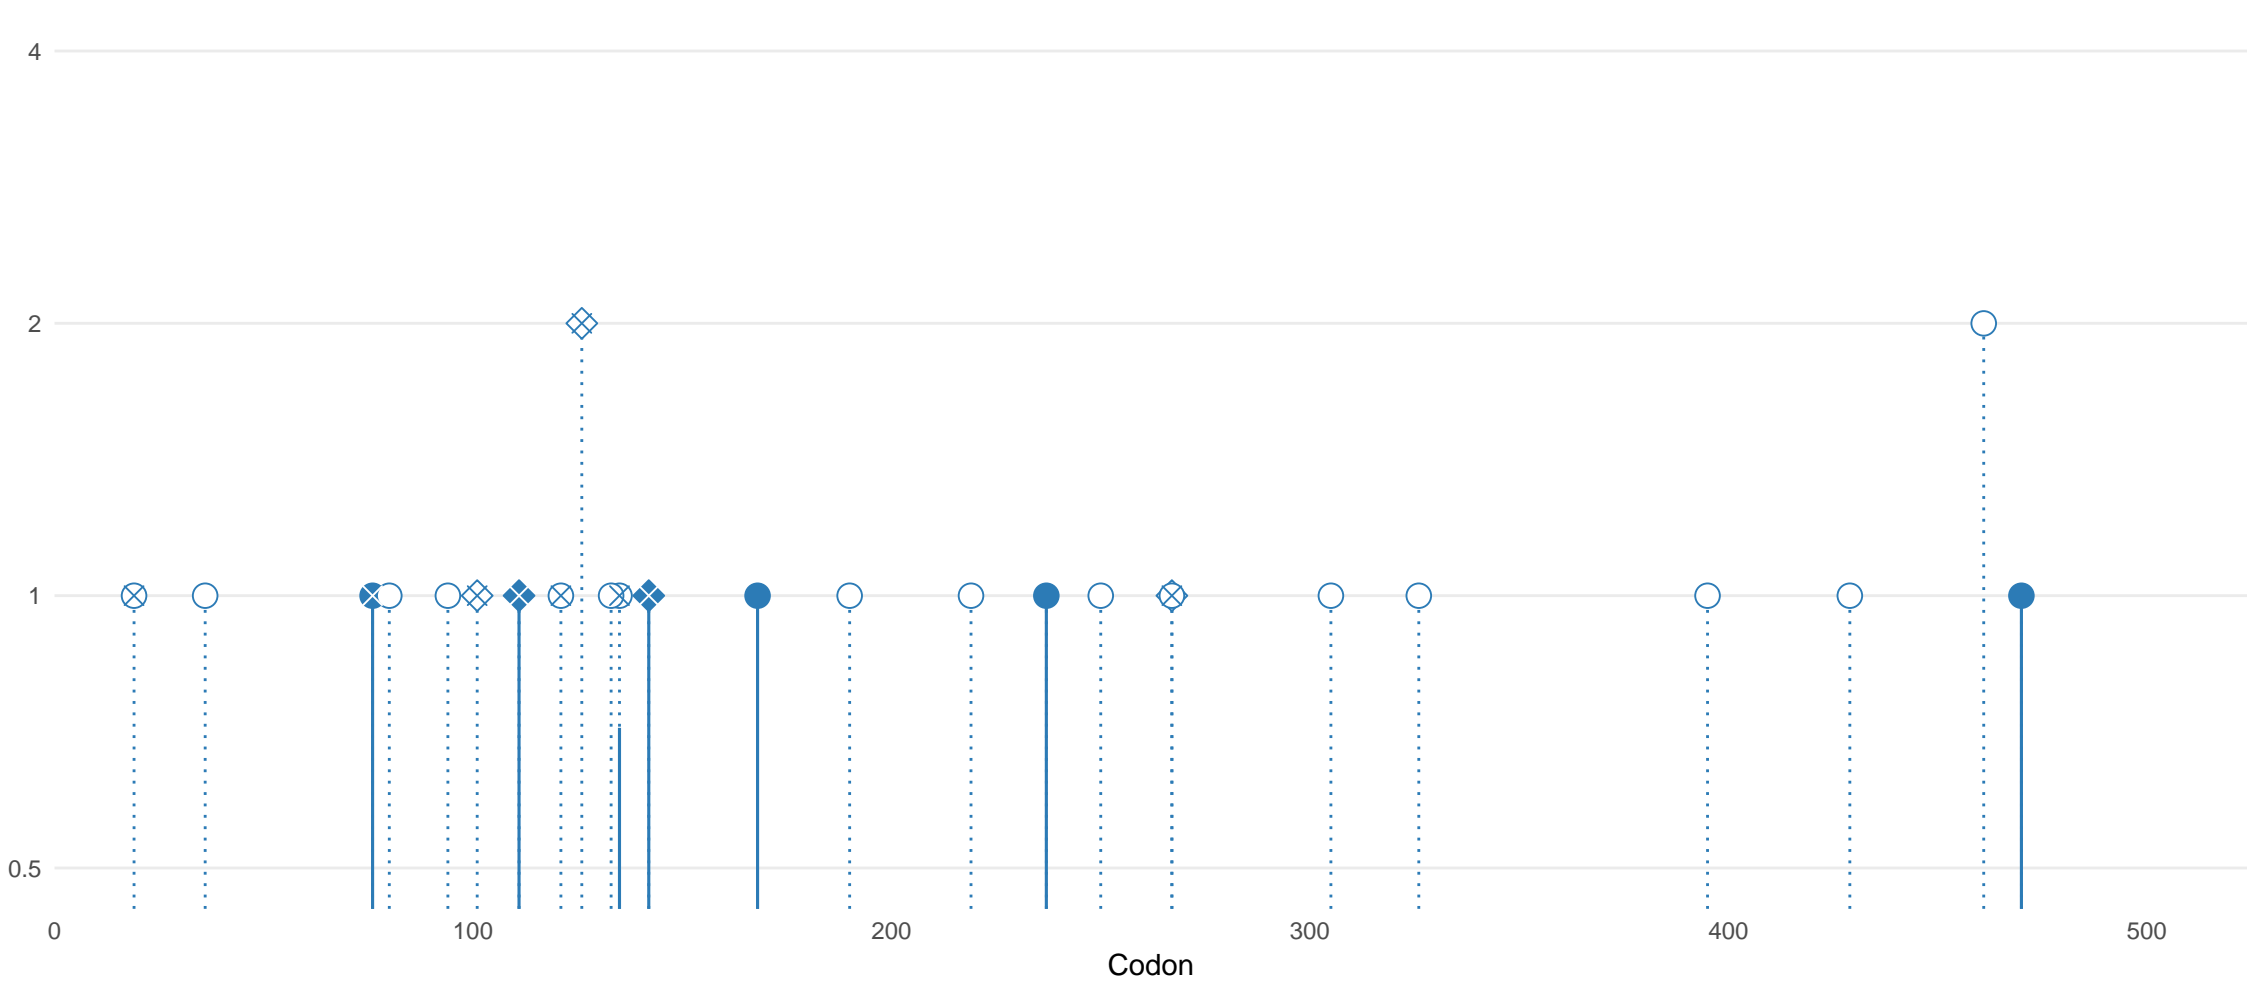

**Monoallelic:** ○ SNV □ MNV ◇ INDEL in frame ⊗ SNV nonsense ⊠ MNV nonsense ⬠ INDEL out of frame  
**Biallelic/Multihit:** ● SNV ■ MNV ◆ INDEL in frame ⊗ SNV nonsense ⊠ MNV nonsense ⬠ INDEL out of frame  
**Hotspot:** ●

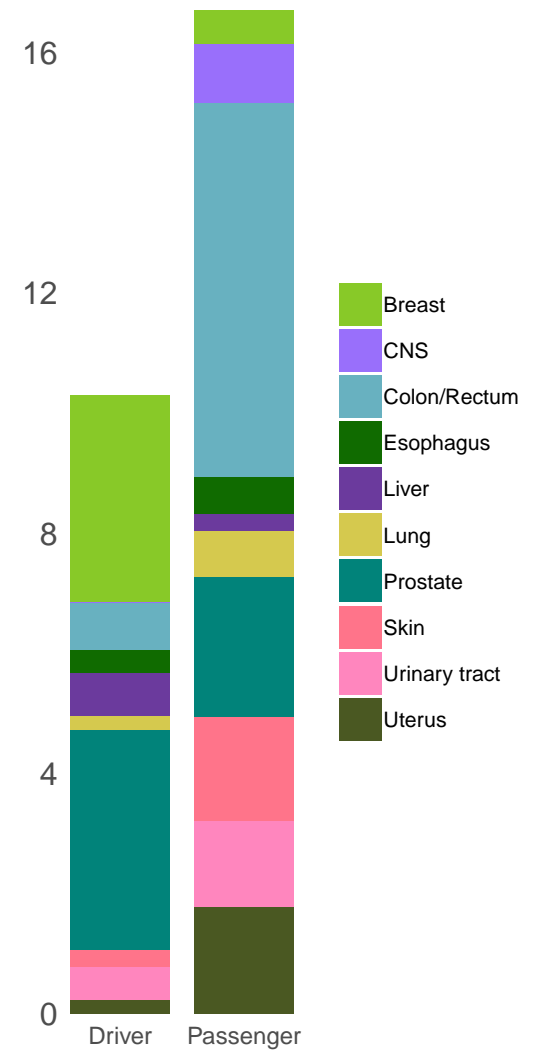



# TBX3 Variants

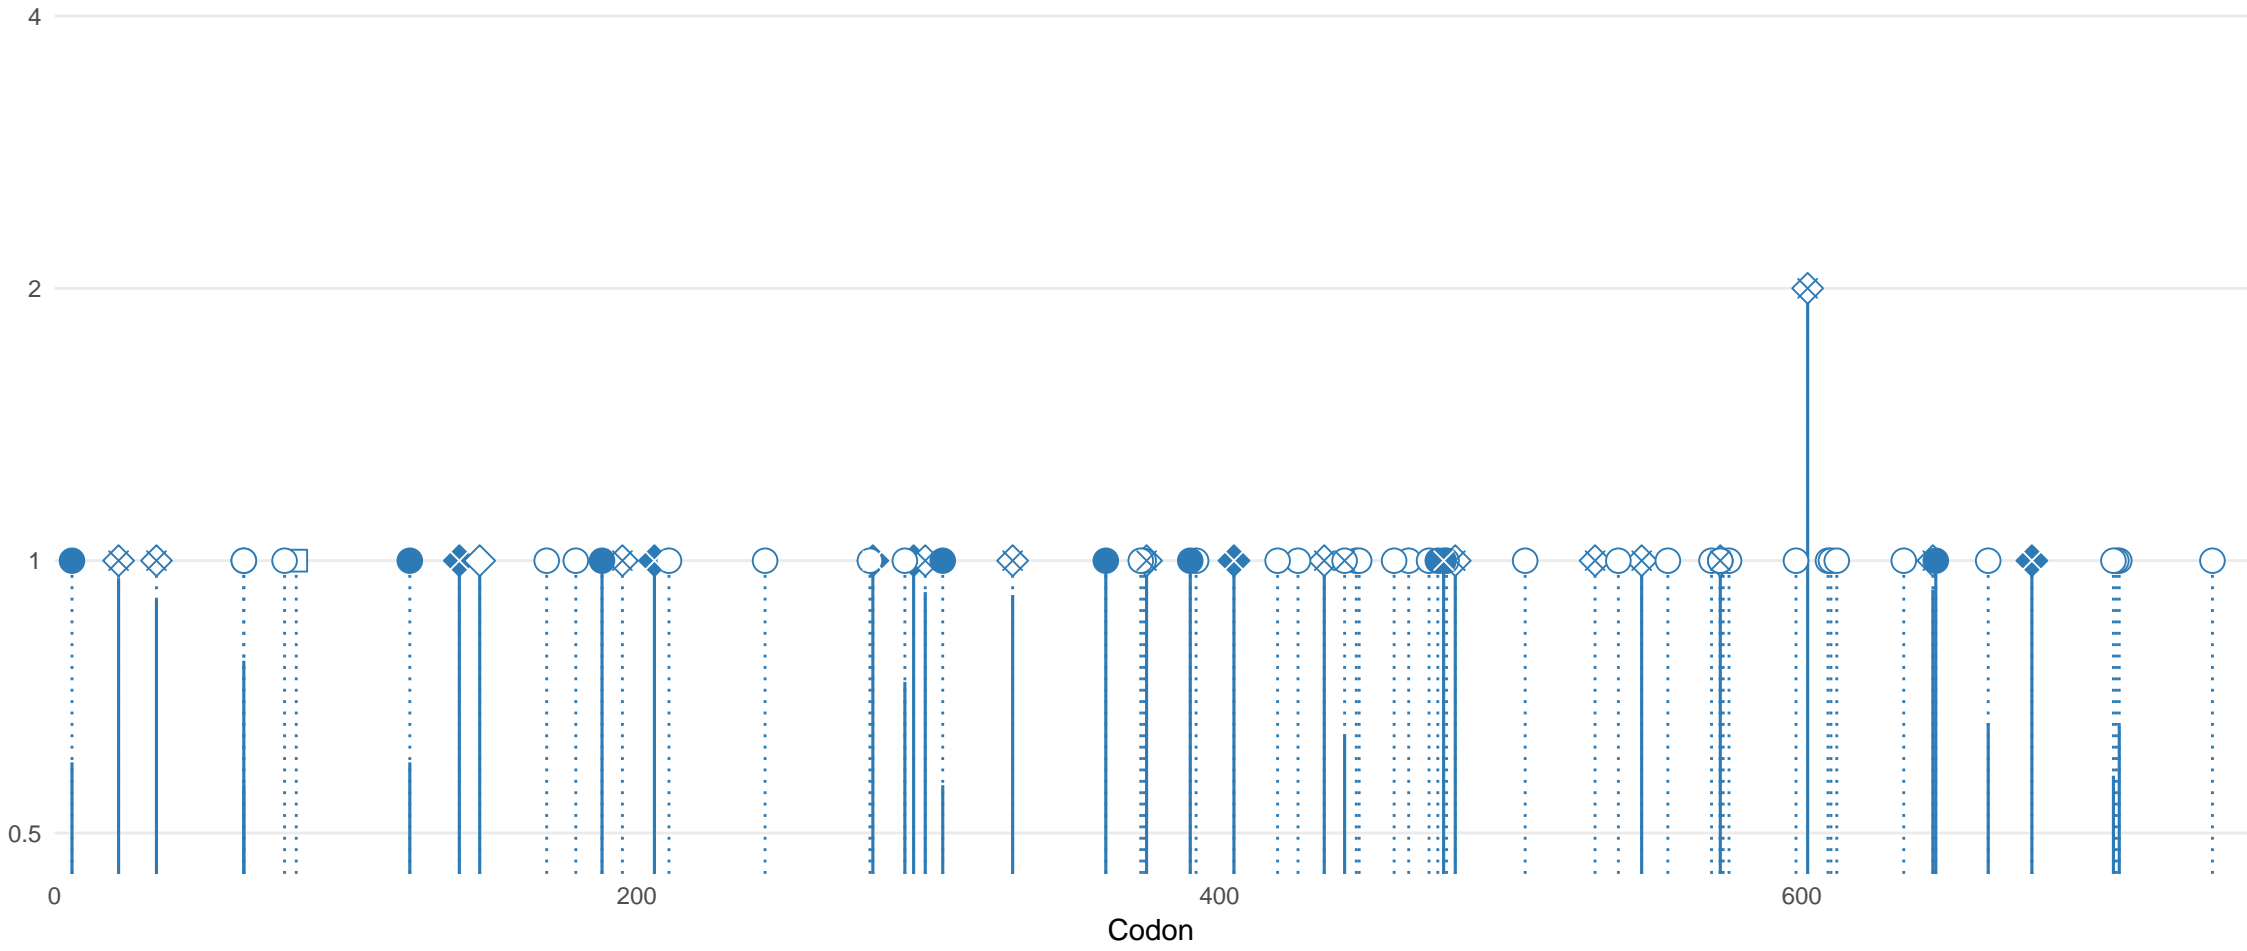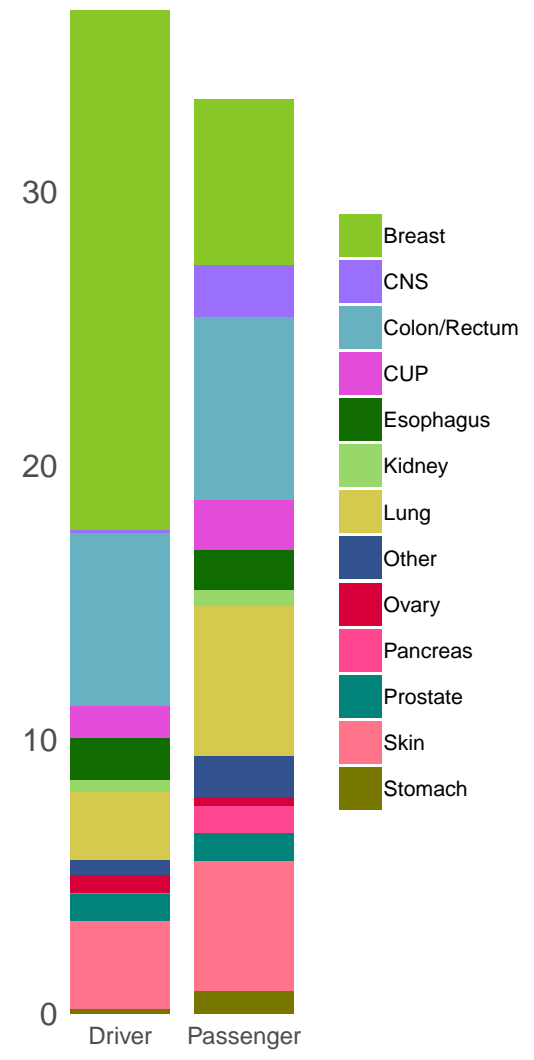

# TCF7L2 Variants

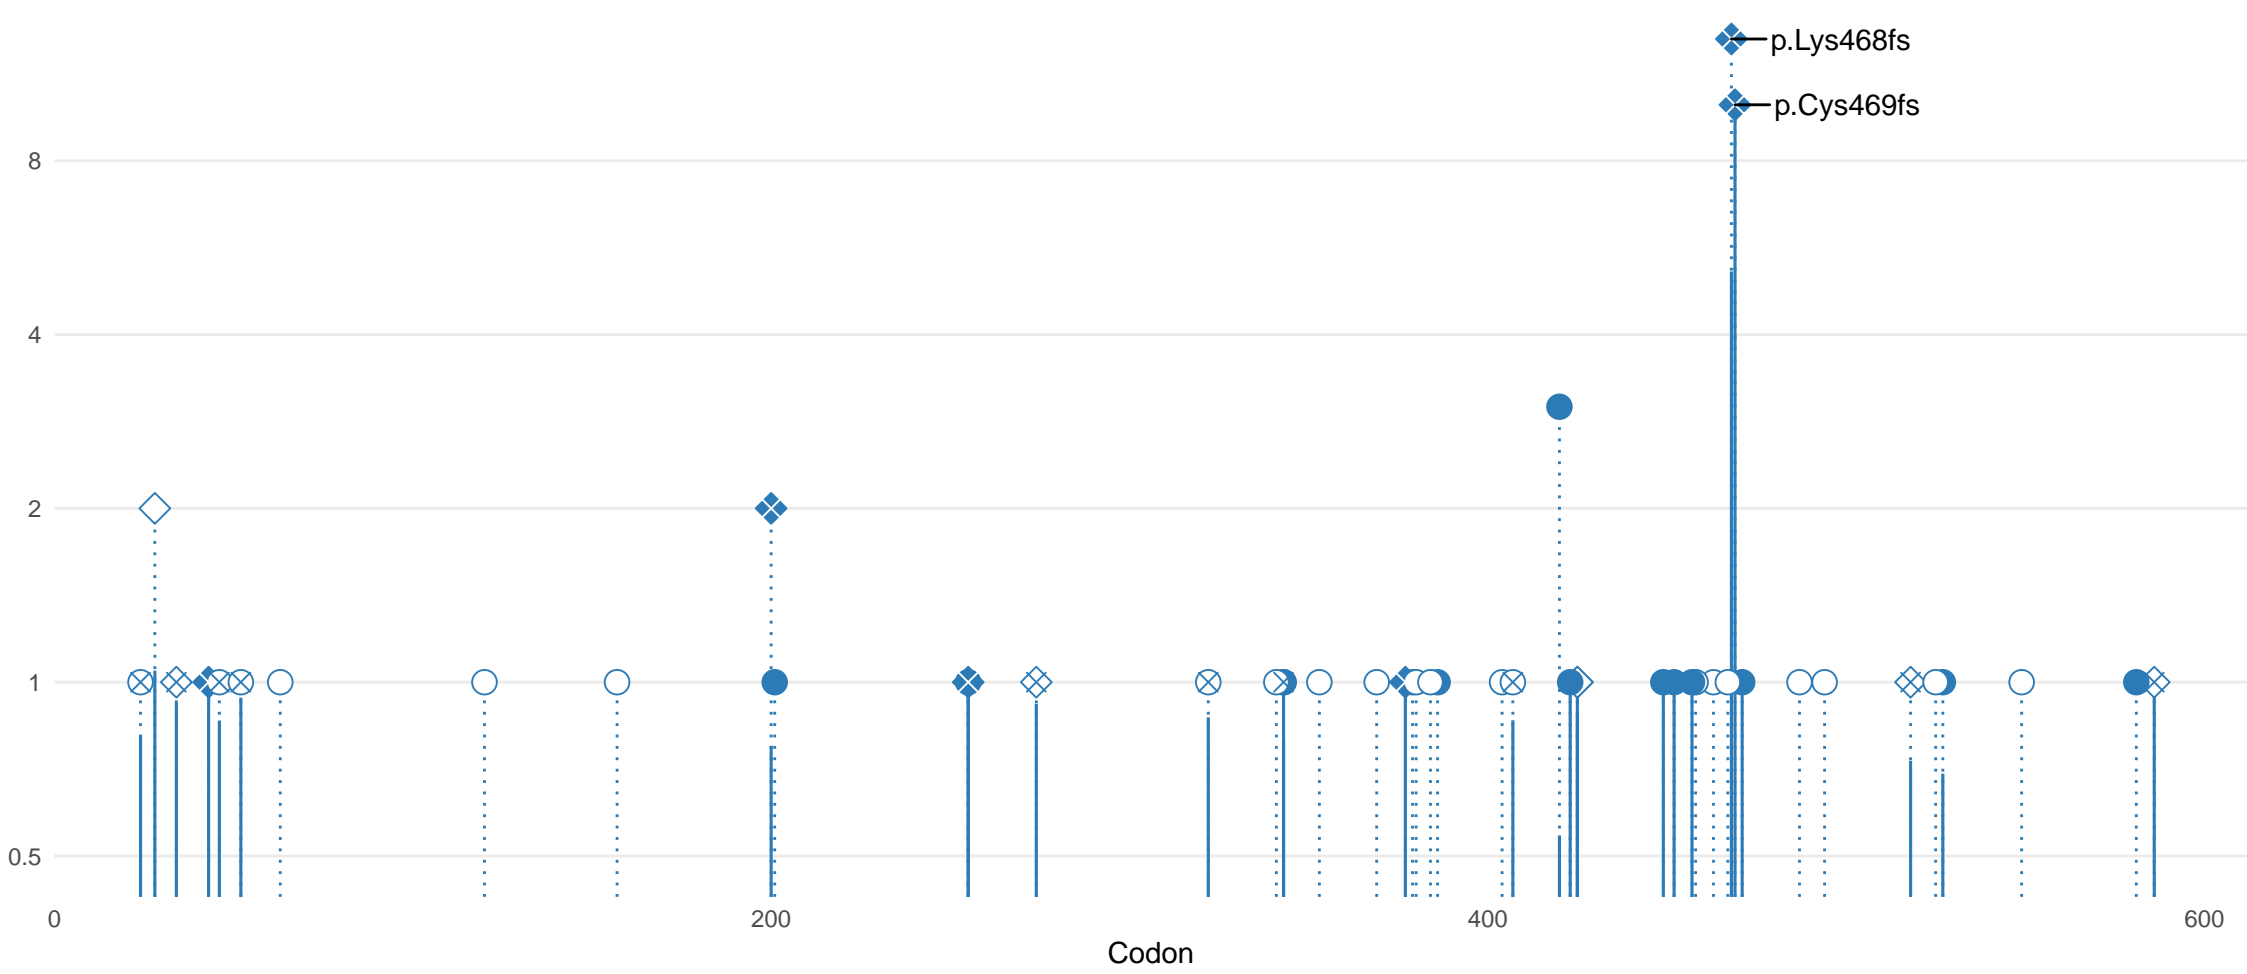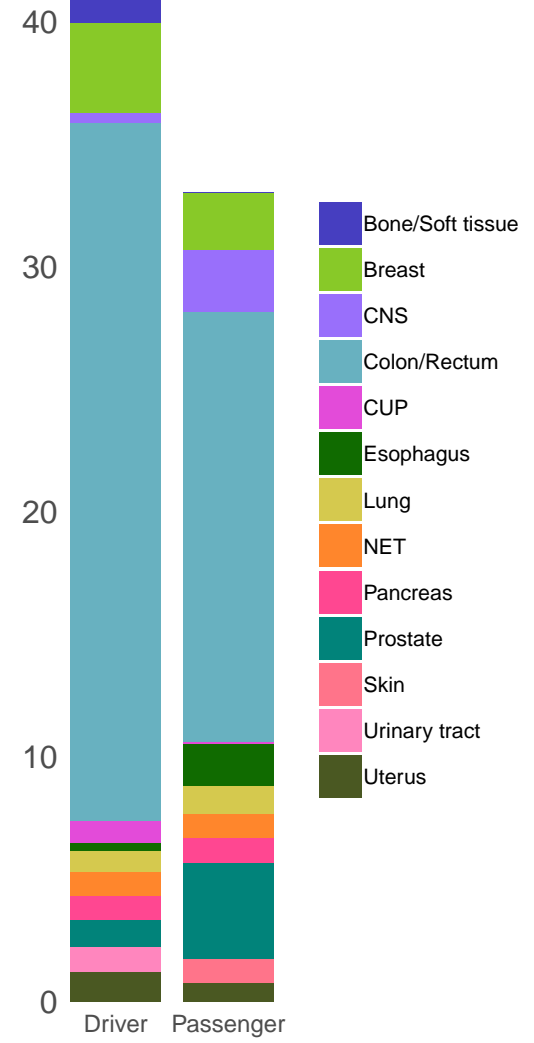

Monoallelic: ○ SNV □ MNV ◇ INDEL in frame ⊗ SNV nonsense ⊠ MNV nonsense ⊞ INDEL out of frame Biallelic/Multihit: ● SNV ■ MNV ◆ INDEL in frame ⊗ SNV nonsense ⊠ MNV nonsense ⊞ INDEL out of frame Hotspot: ● (Red)

# TET2 Variants

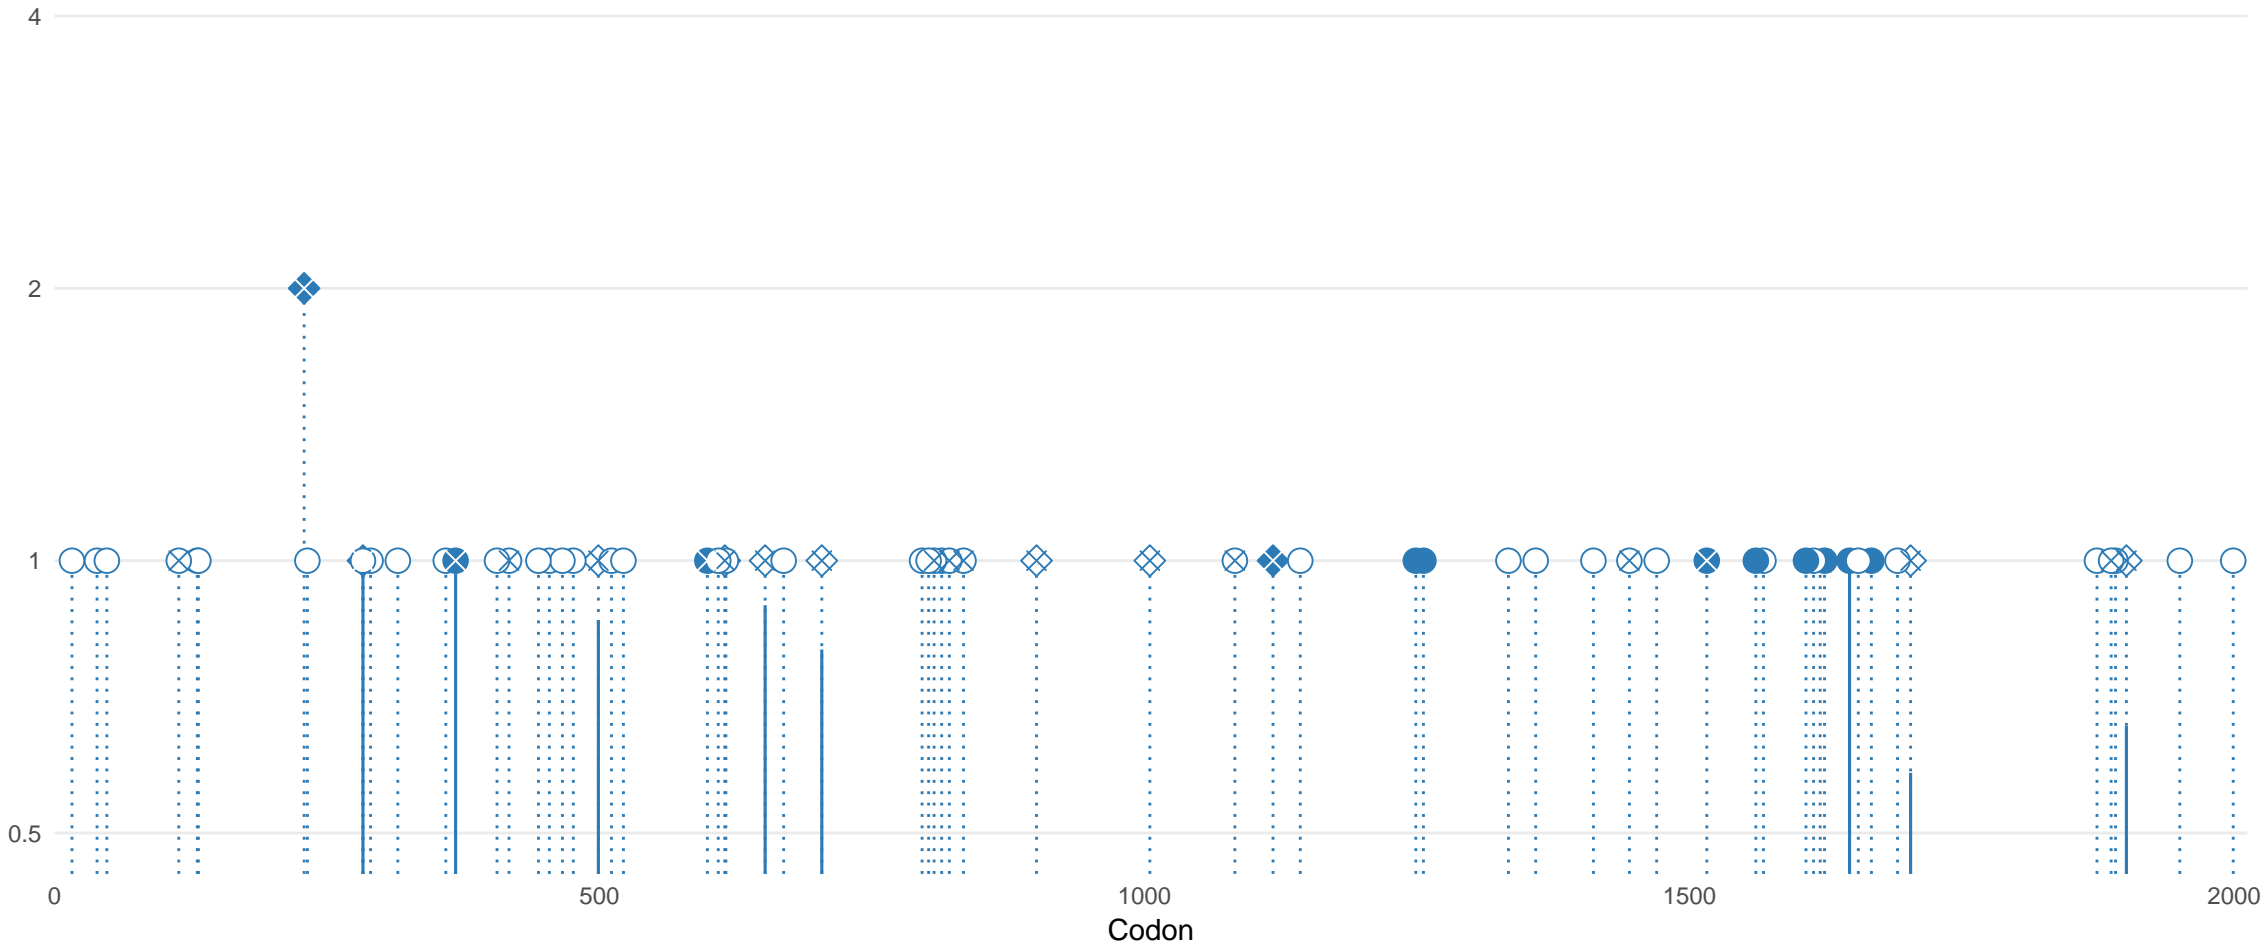

**Monoallelic:** ○ SNV □ MNV ◇ INDEL in frame ⊗ SNV nonsense ⊗ MNV nonsense ⊗ INDEL out of frame  
**Biallelic/Multihit:** ● SNV ■ MNV ◆ INDEL in frame ⊗ SNV nonsense ⊗ MNV nonsense ◆ INDEL out of frame  
**Hotspot:** ●

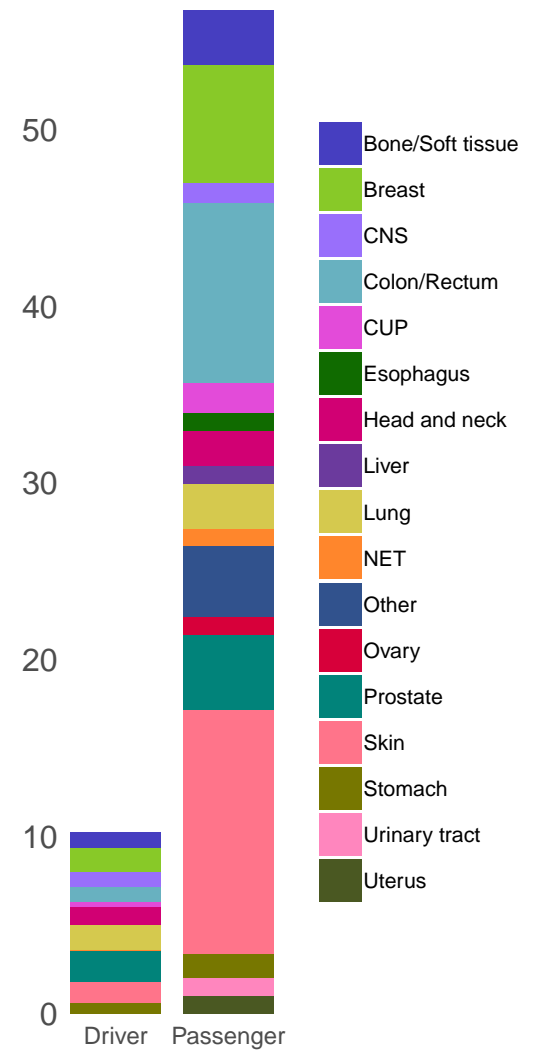

Driver Passenger

# TGFBR2 Variants

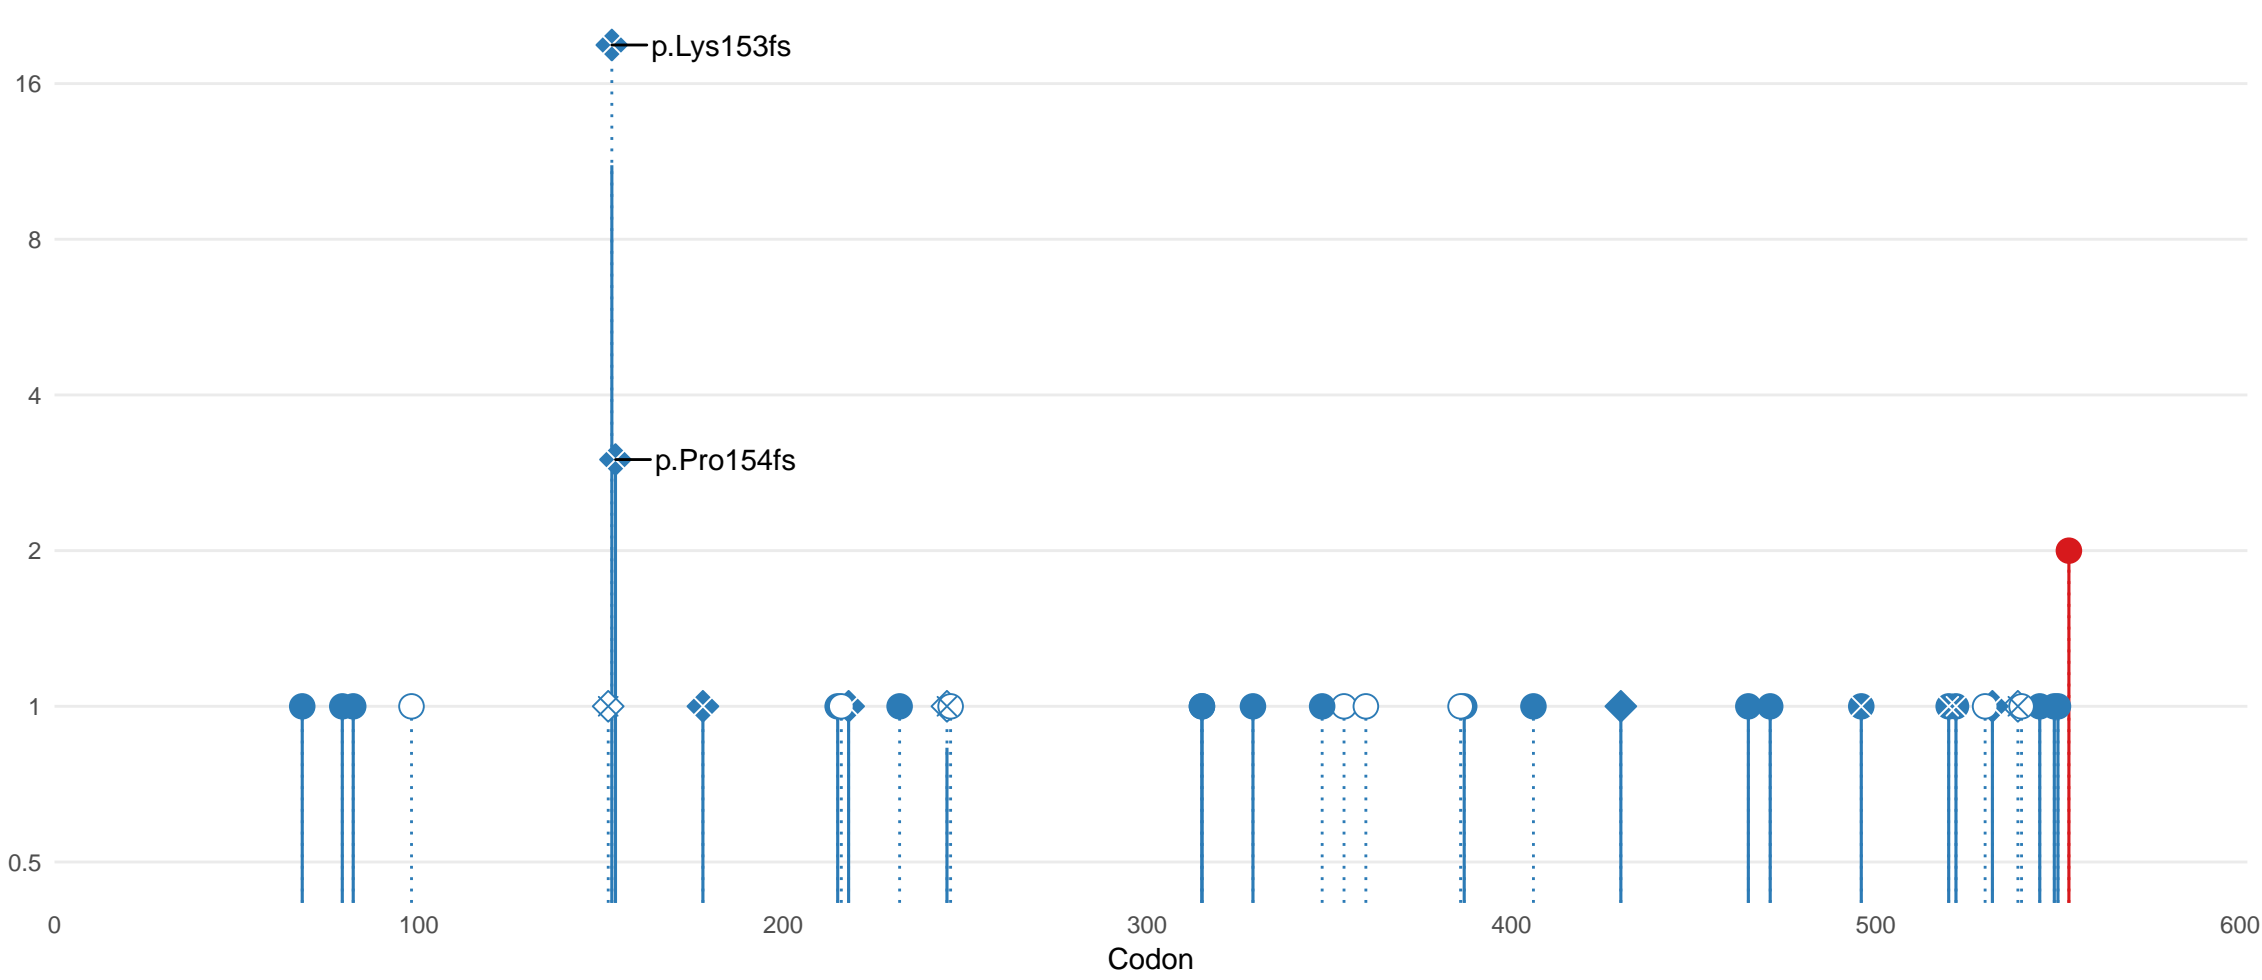

Monoallelic: ○ SNV □ MNV ◇ INDEL in frame ⊗ SNV nonsense ⊗ MNV nonsense ⊗ INDEL out of frame  
 Biallelic/Multihit: ● SNV ■ MNV ◆ INDEL in frame ⊗ SNV nonsense ⊗ MNV nonsense ◆ INDEL out of frame Hotspot: ●

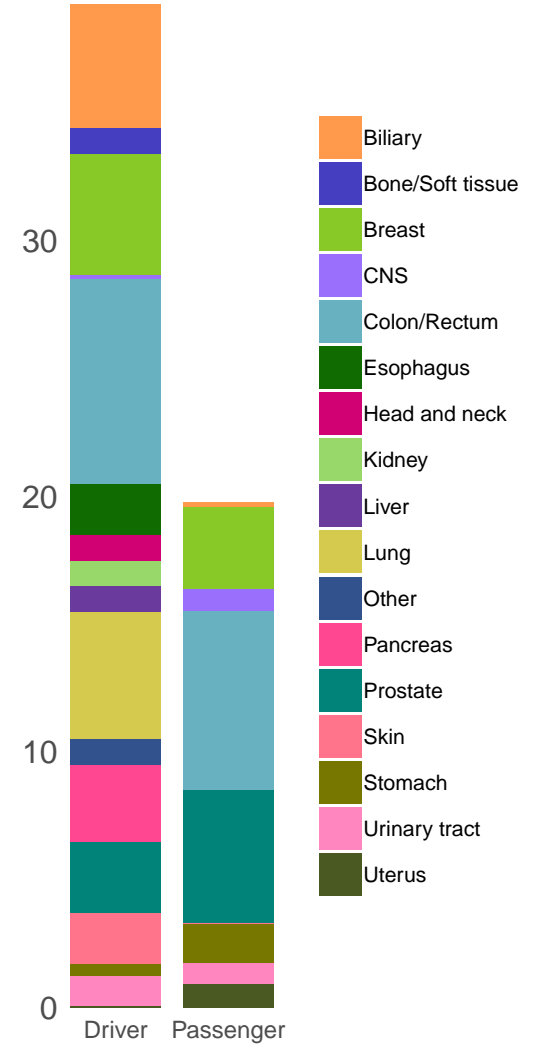

# TGIF1 Variants

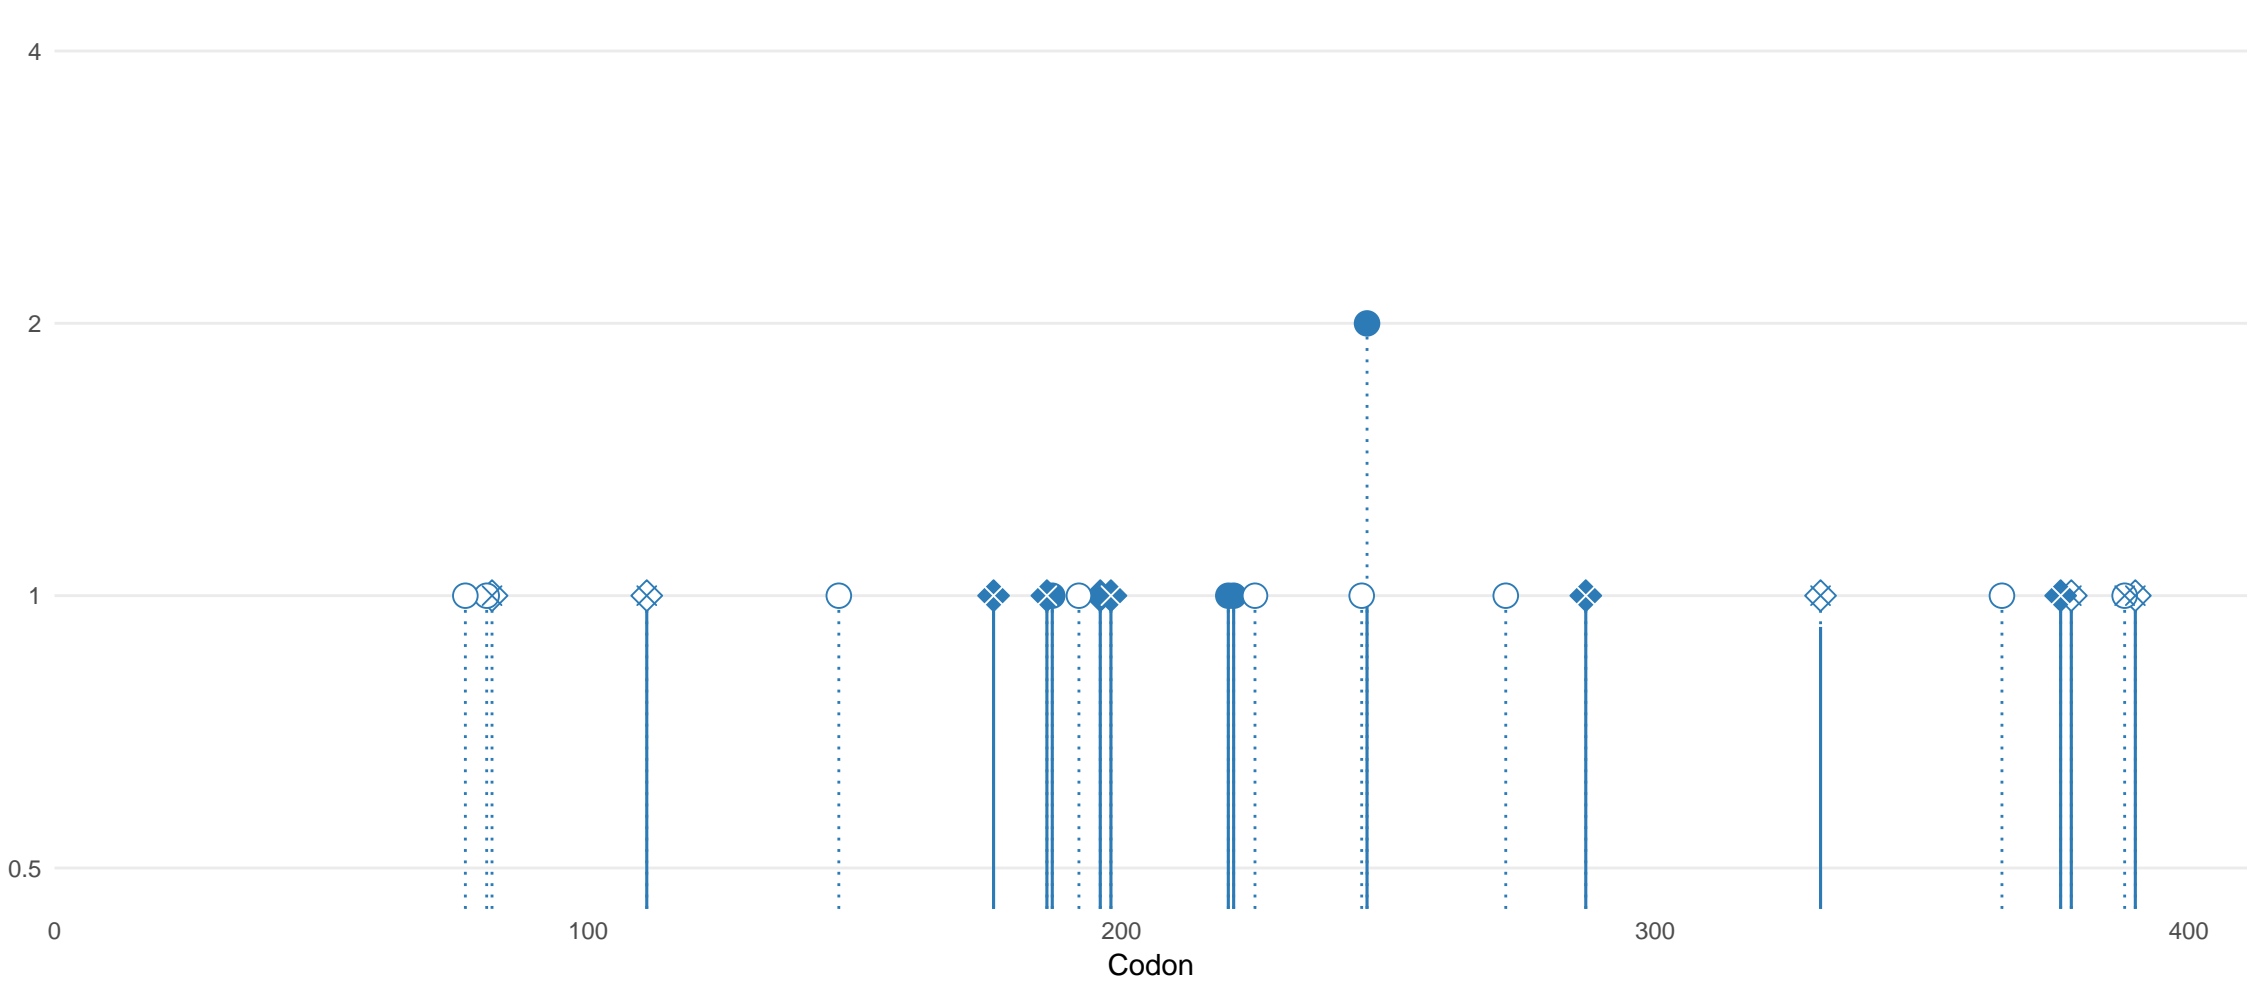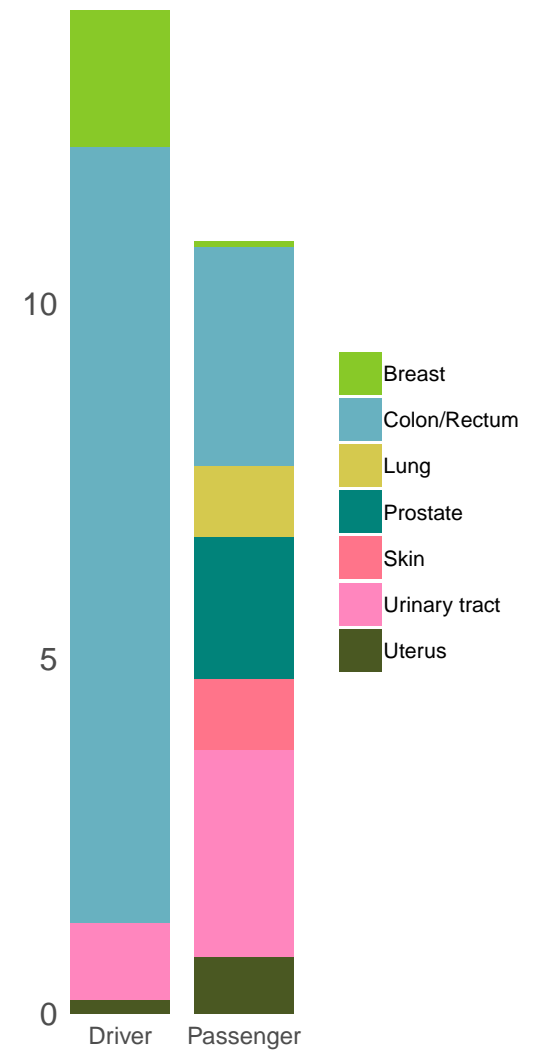

Monoallelic: ○ SNV □ MNV ◆ INDEL in frame ⊠ SNV nonsense ⊠ MNV nonsense ⊠ INDEL out of frame Biallelic/Multihit: ● SNV ■ MNV ◆ INDEL in frame ⊠ SNV nonsense ⊠ MNV nonsense ◆ INDEL out of frame Hotspot: ●

# TNFAIP3 Variants

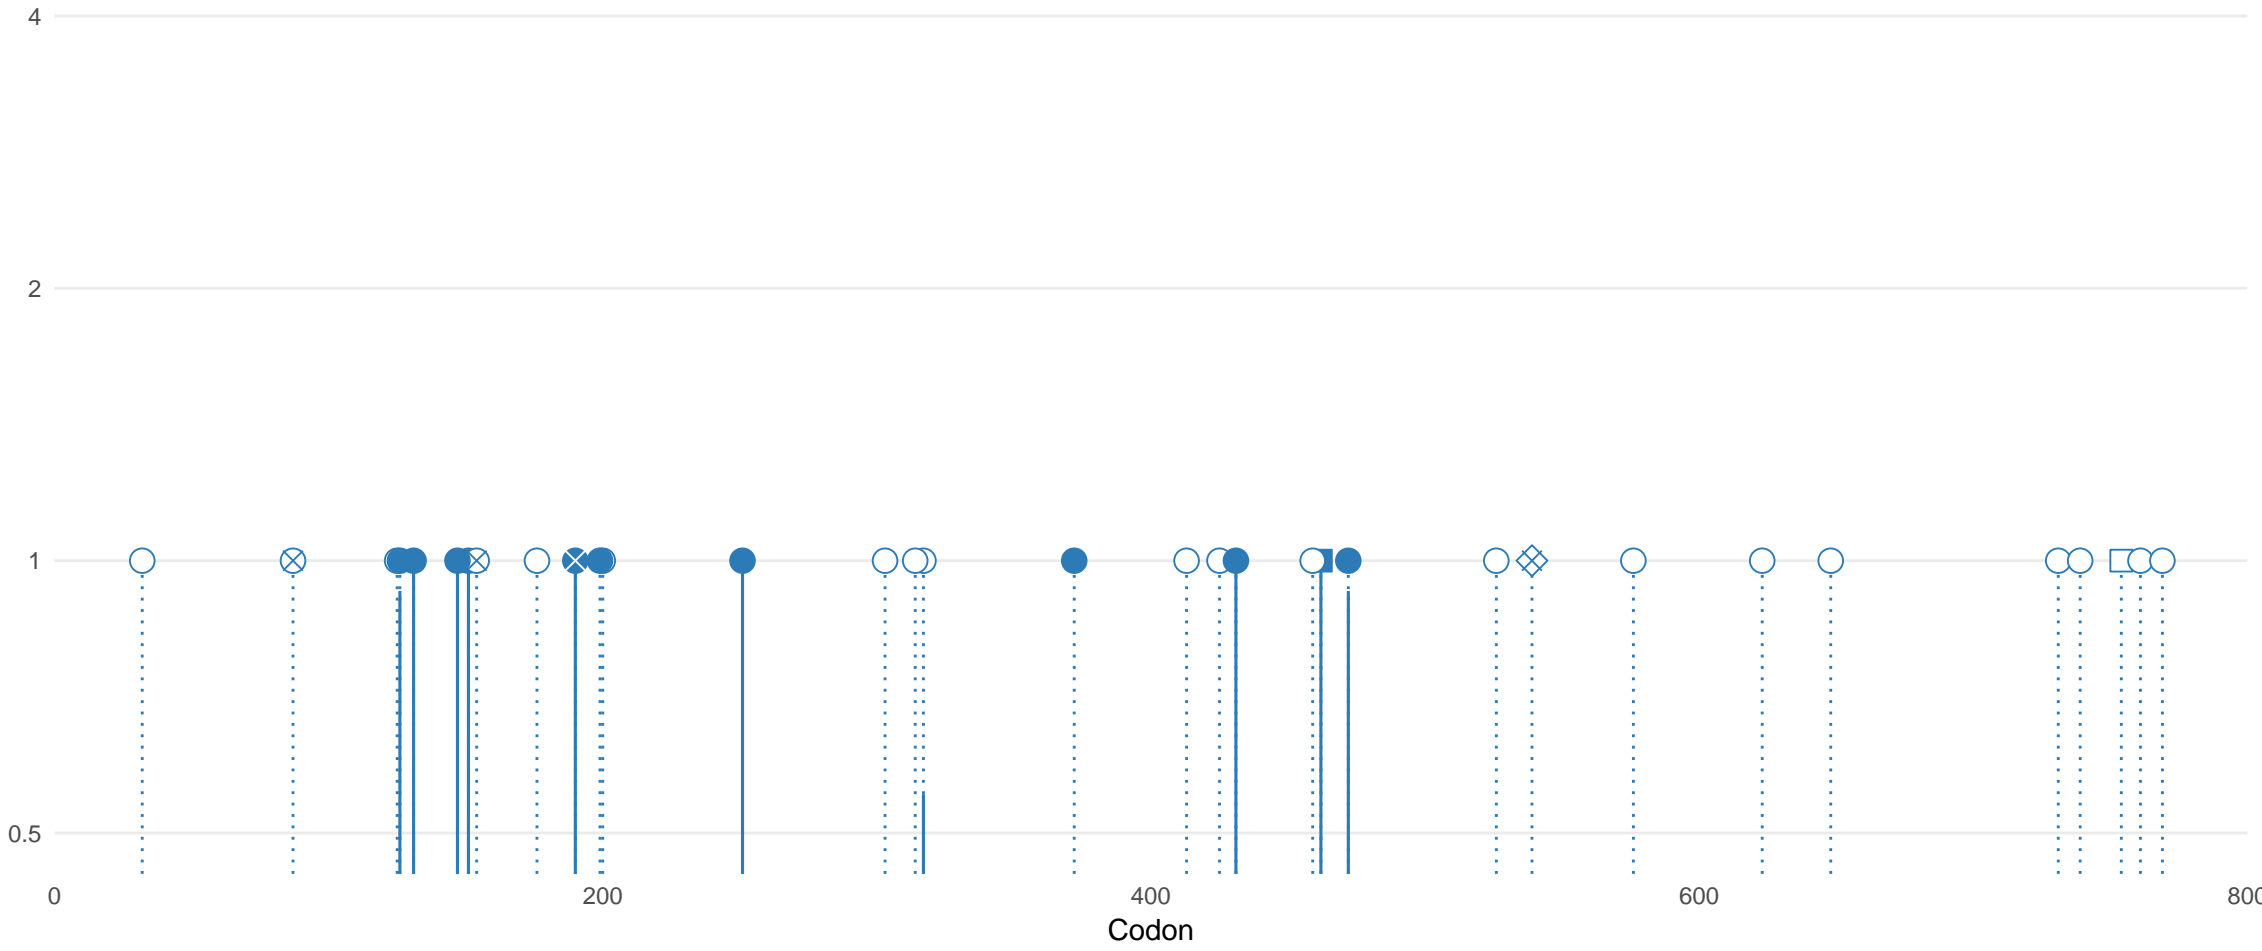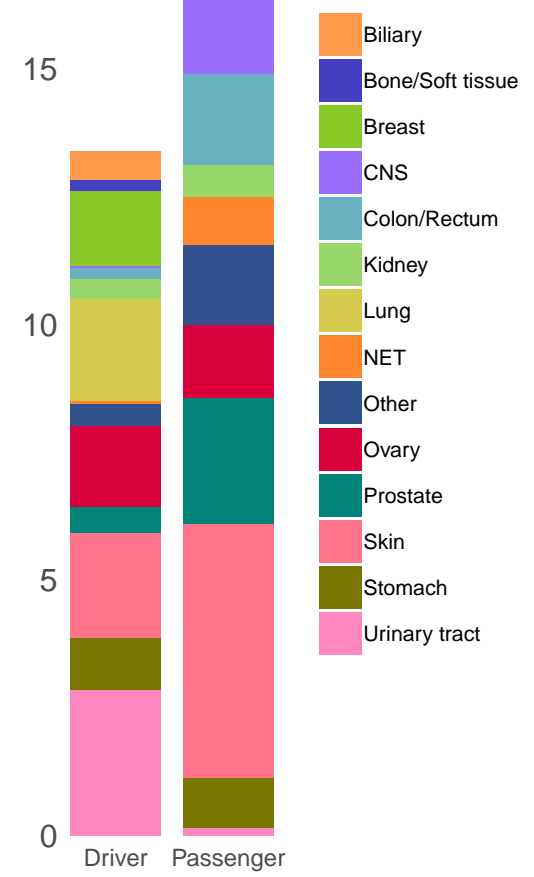

**Monoallelic:** ○ SNV □ MNV ◇ INDEL in frame ⊗ SNV nonsense ⊠ MNV nonsense ⬠ INDEL out of frame  
**Biallelic/Multihit:** ● SNV ■ MNV ◆ INDEL in frame ⊗ SNV nonsense ⊠ MNV nonsense ⬠ INDEL out of frame  
**Hotspot:** ●

# TNFRSF14 Variants

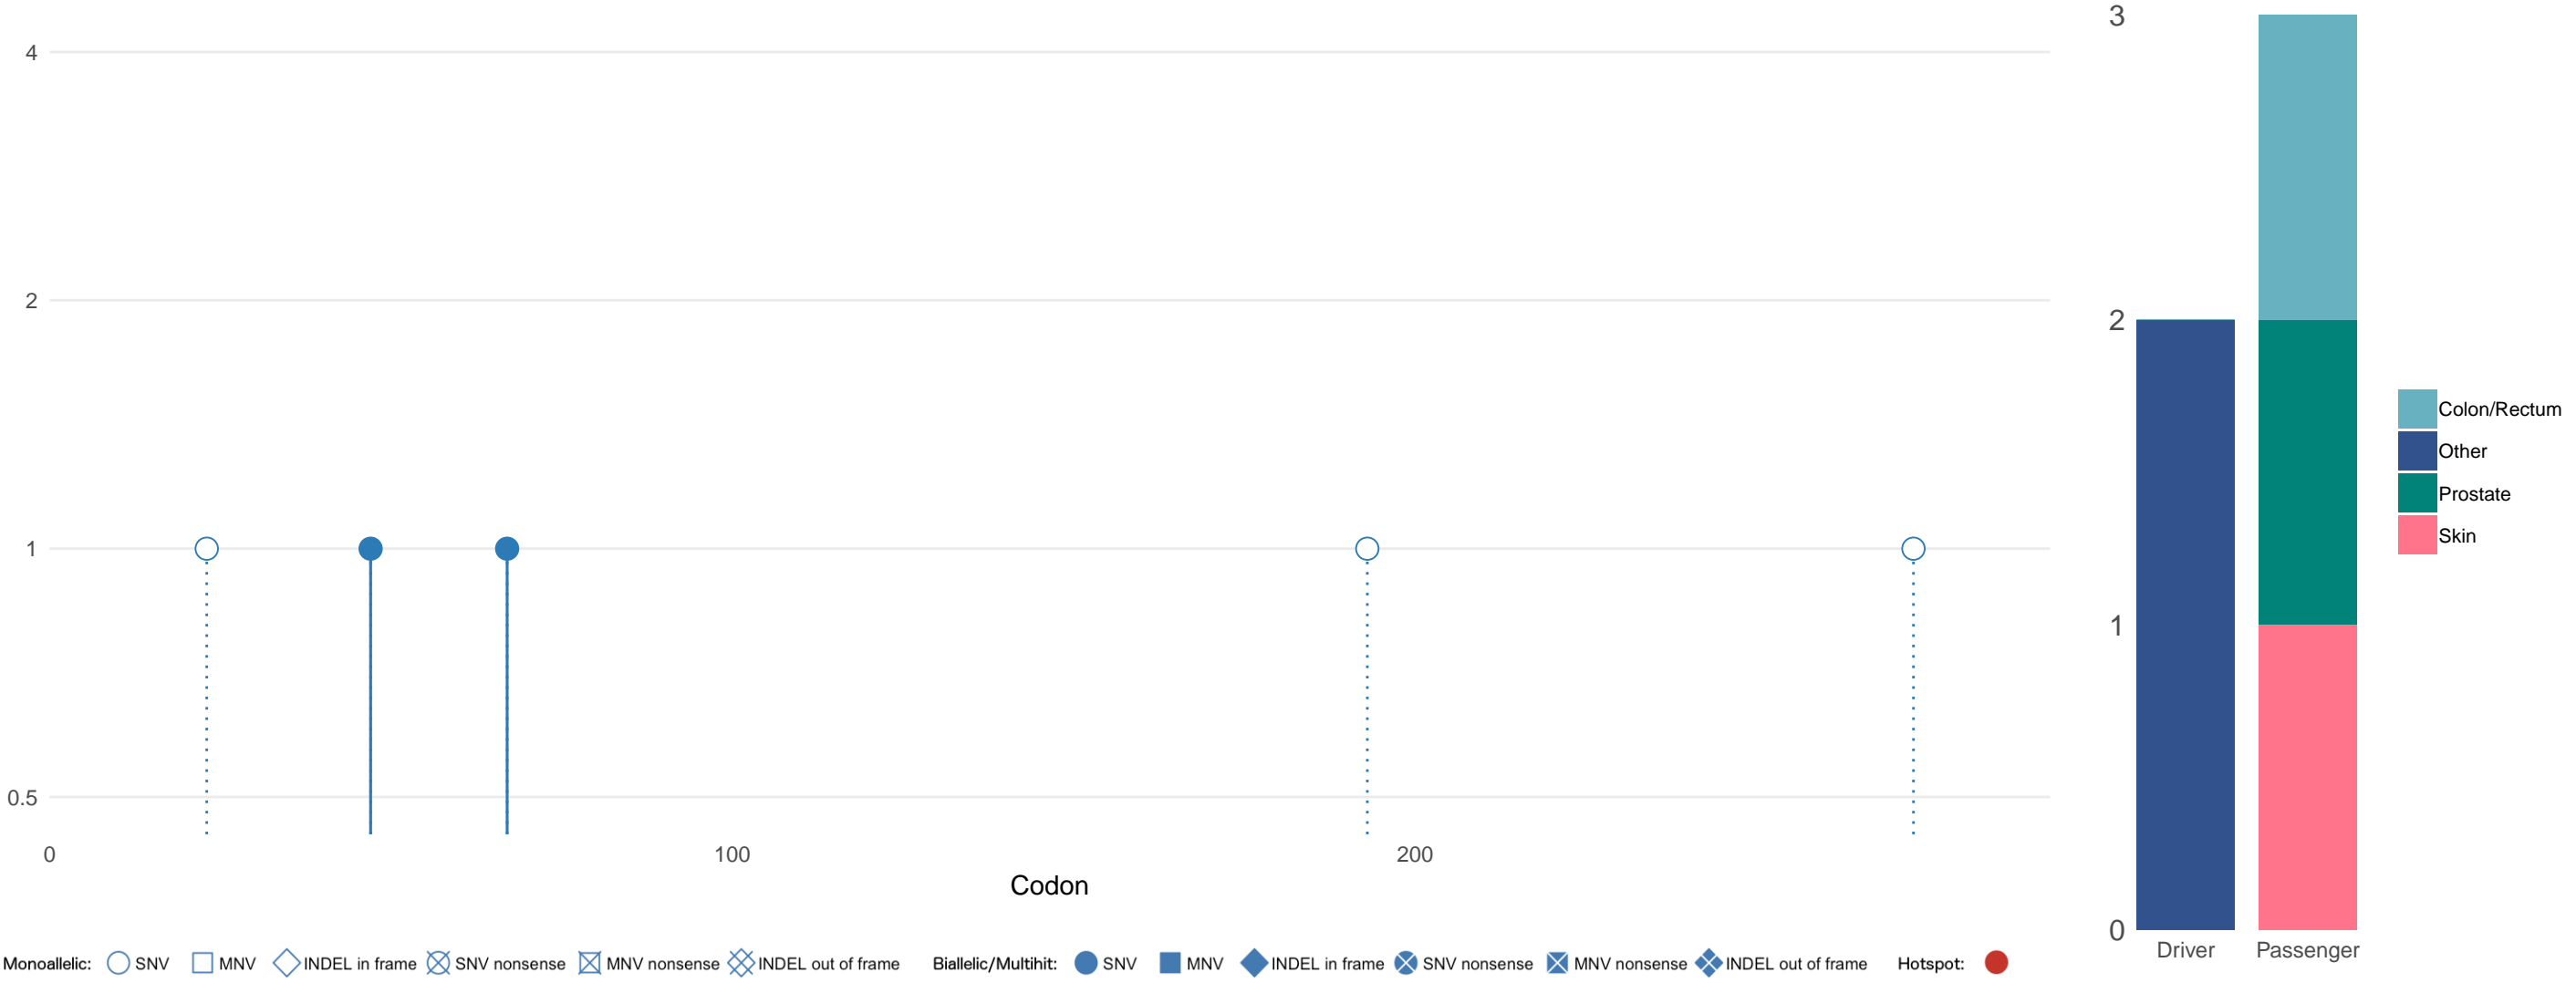

# TP53 Variants

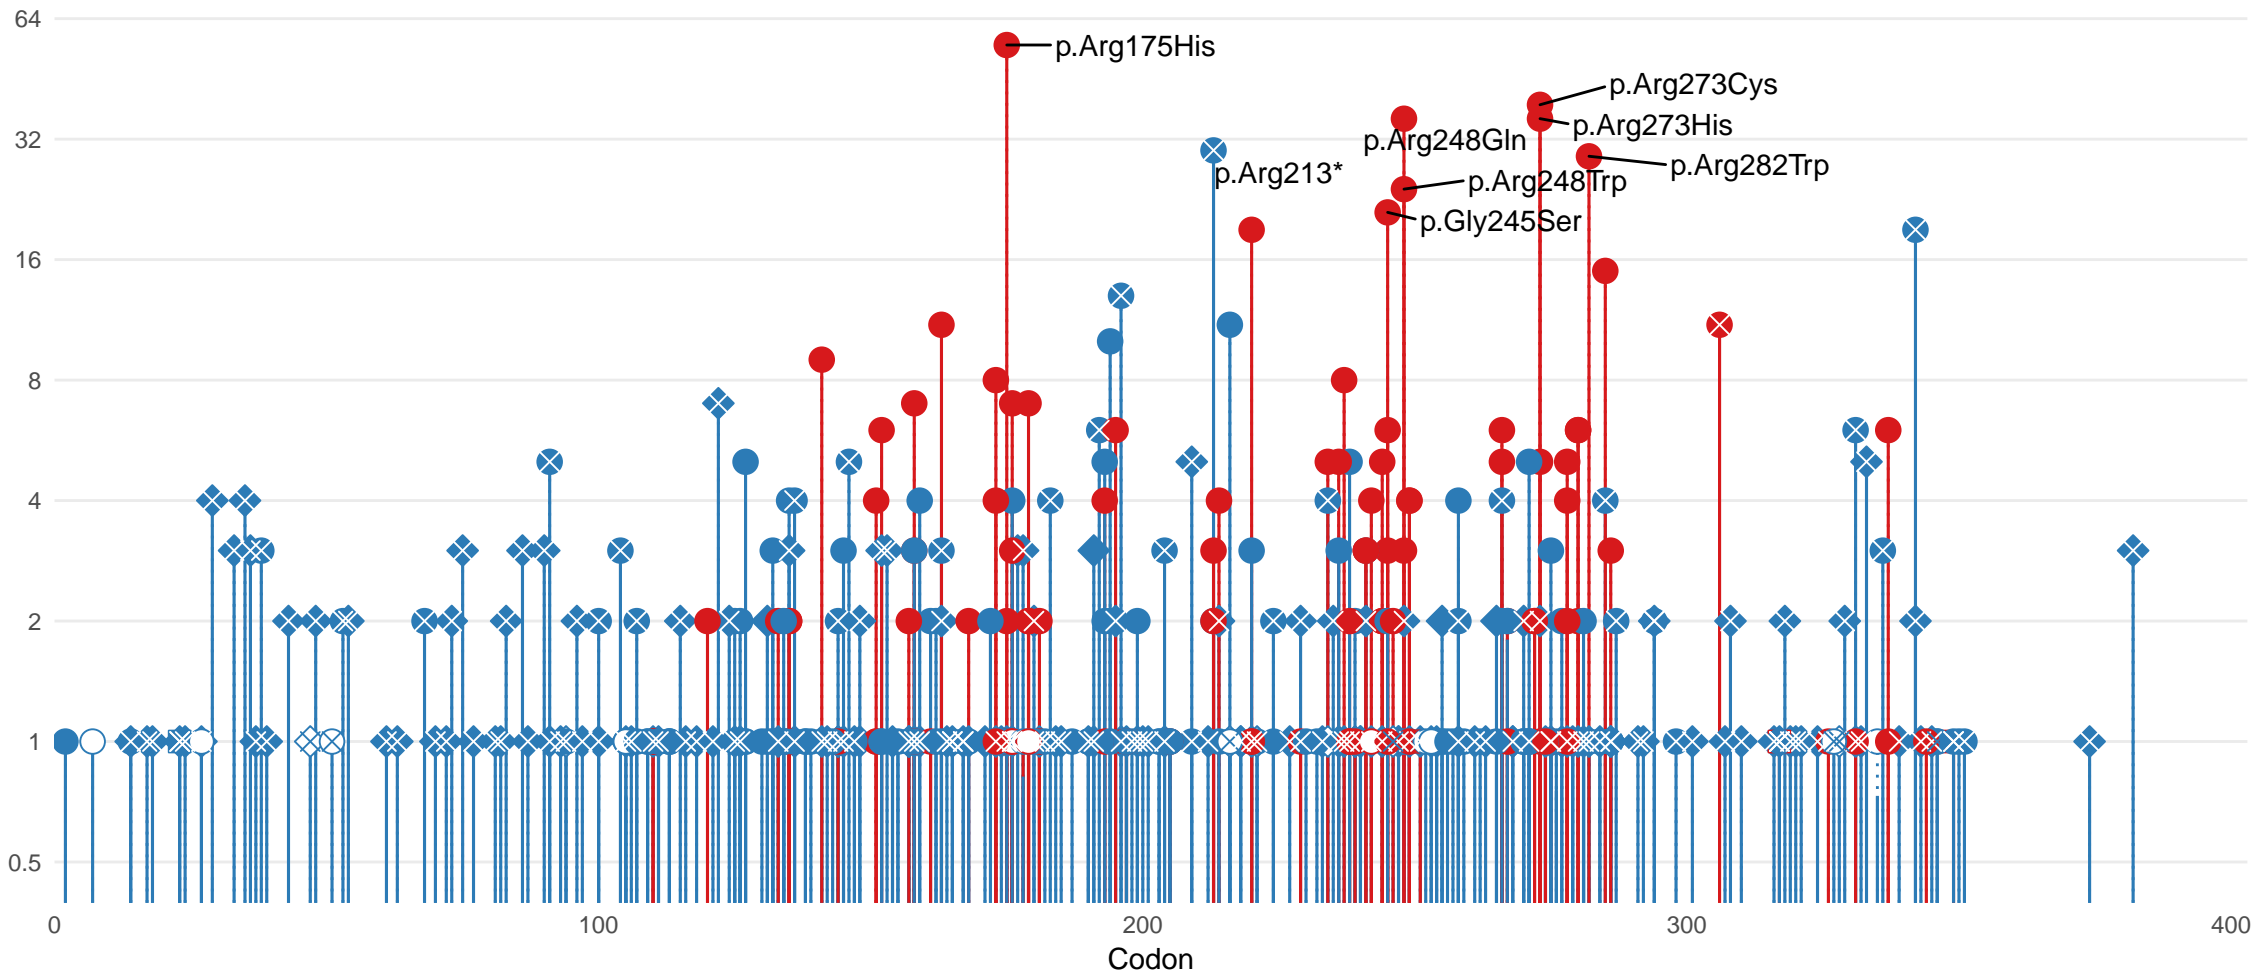

**Monoallelic:** ○ SNV □ MNV ◇ INDEL in frame ⊗ SNV nonsense ⊗ MNV nonsense ⊗ INDEL out of frame  
**Biallelic/Multihit:** ● SNV ■ MNV ◆ INDEL in frame ⊗ SNV nonsense ⊗ MNV nonsense ◆ INDEL out of frame  
**Hotspot:** ●

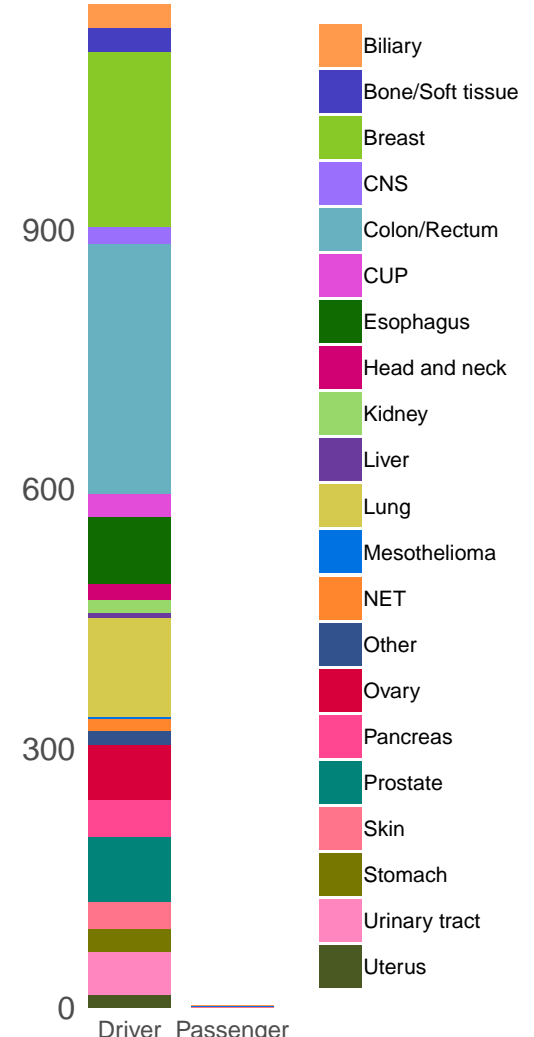

■ Driver ■ Passenger



# TP63 Variants

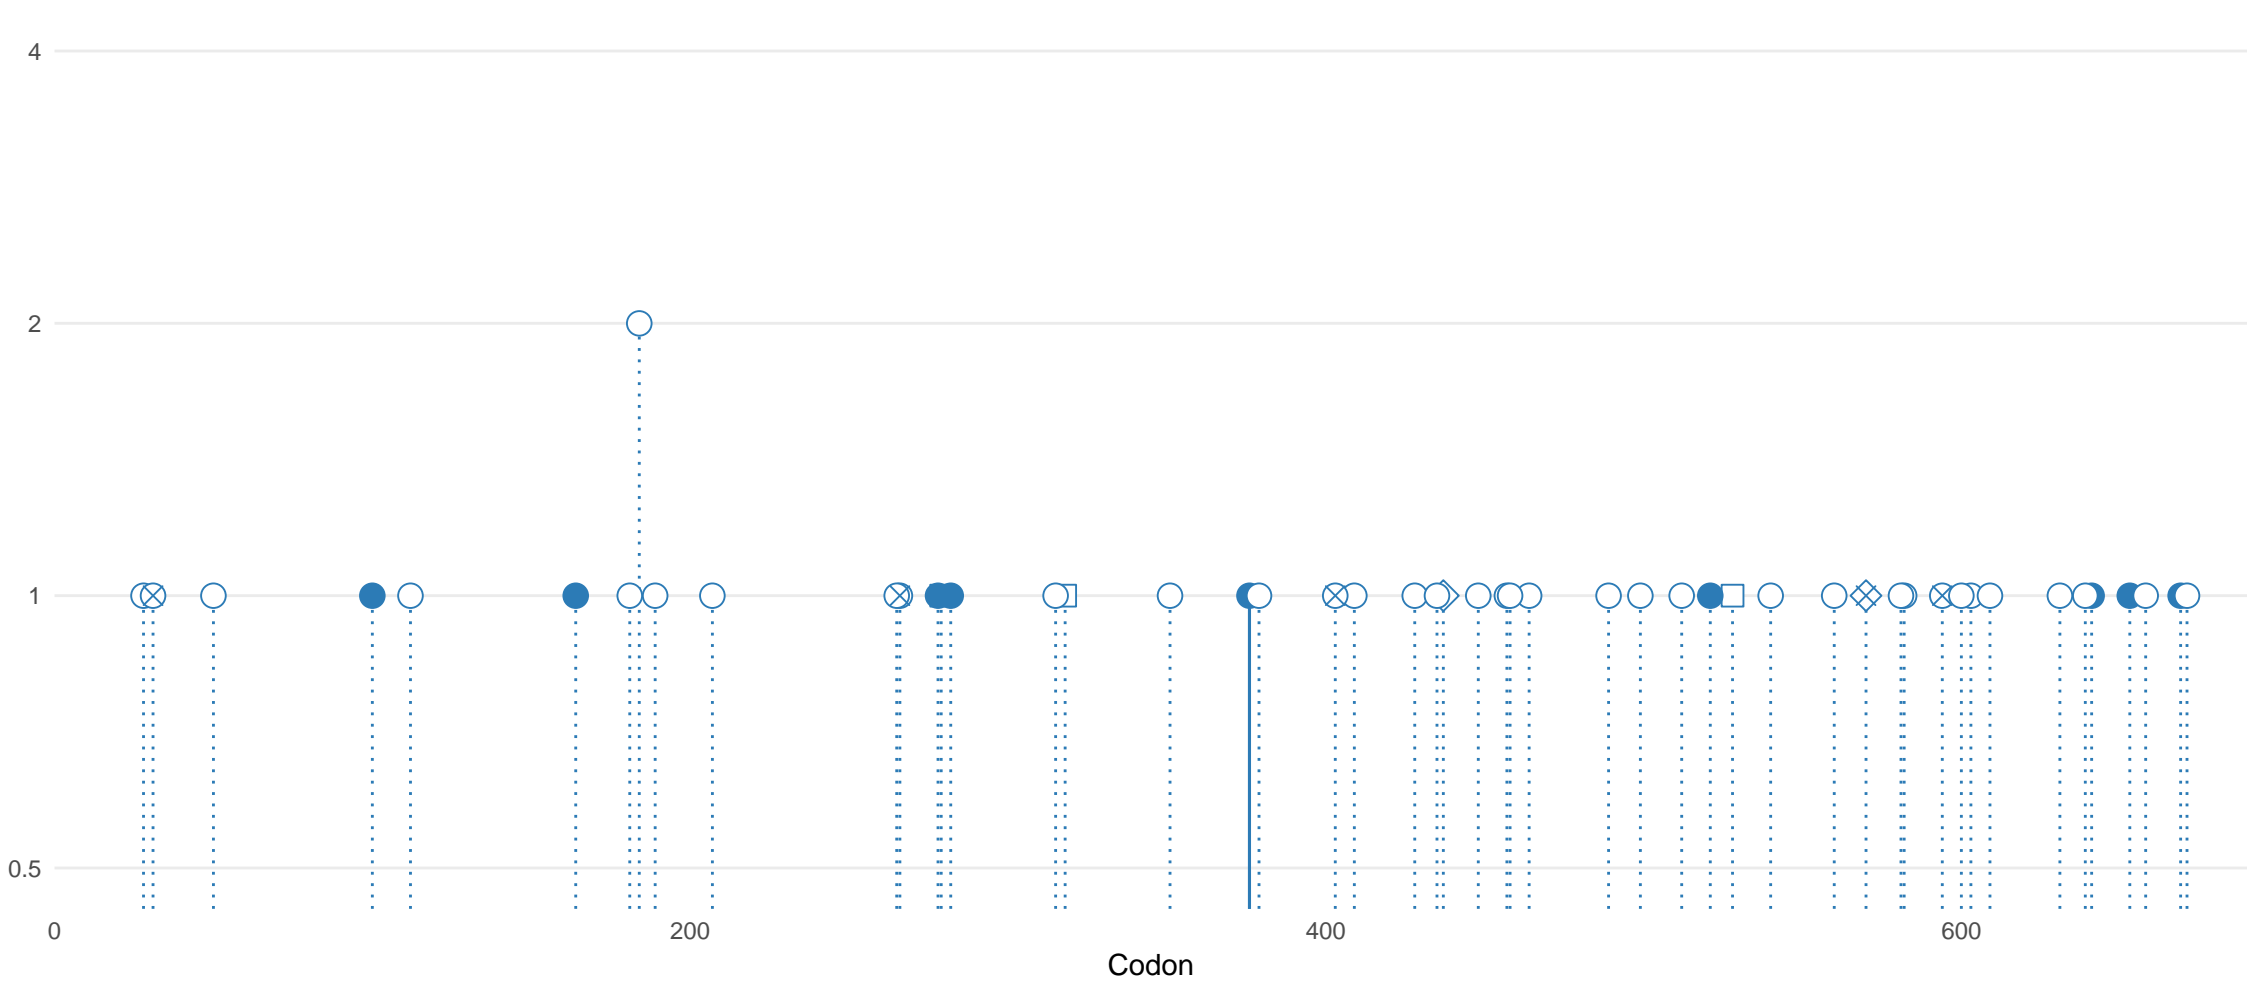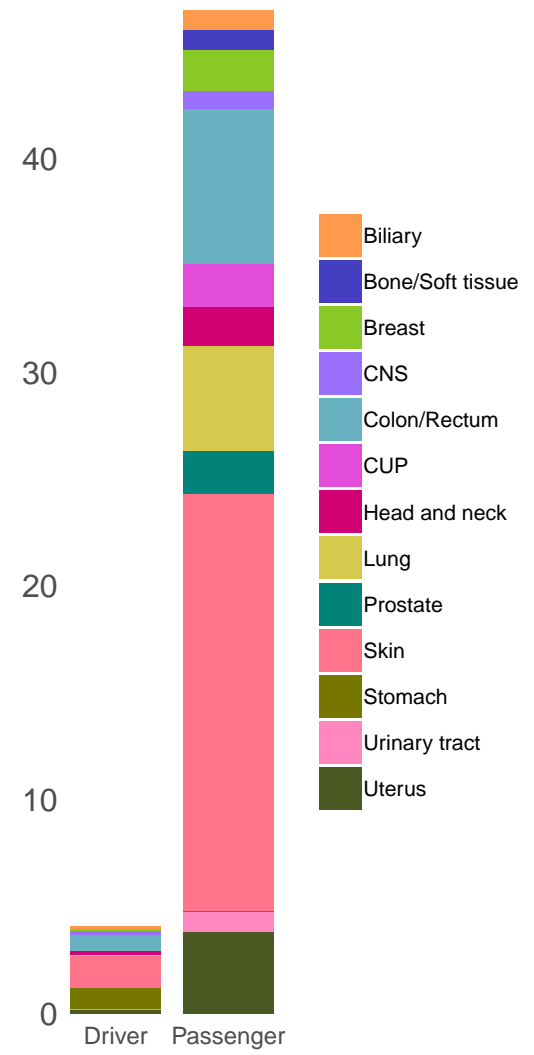

Monoallelic: ○ SNV □ MNV ◇ INDEL in frame ⊗ SNV nonsense ⊠ MNV nonsense ⊡ INDEL out of frame Biallelic/Multihit: ● SNV ■ MNV ◆ INDEL in frame ⊗ SNV nonsense ⊠ MNV nonsense ⊡ INDEL out of frame Hotspot: ●

# TRAF7 Variants

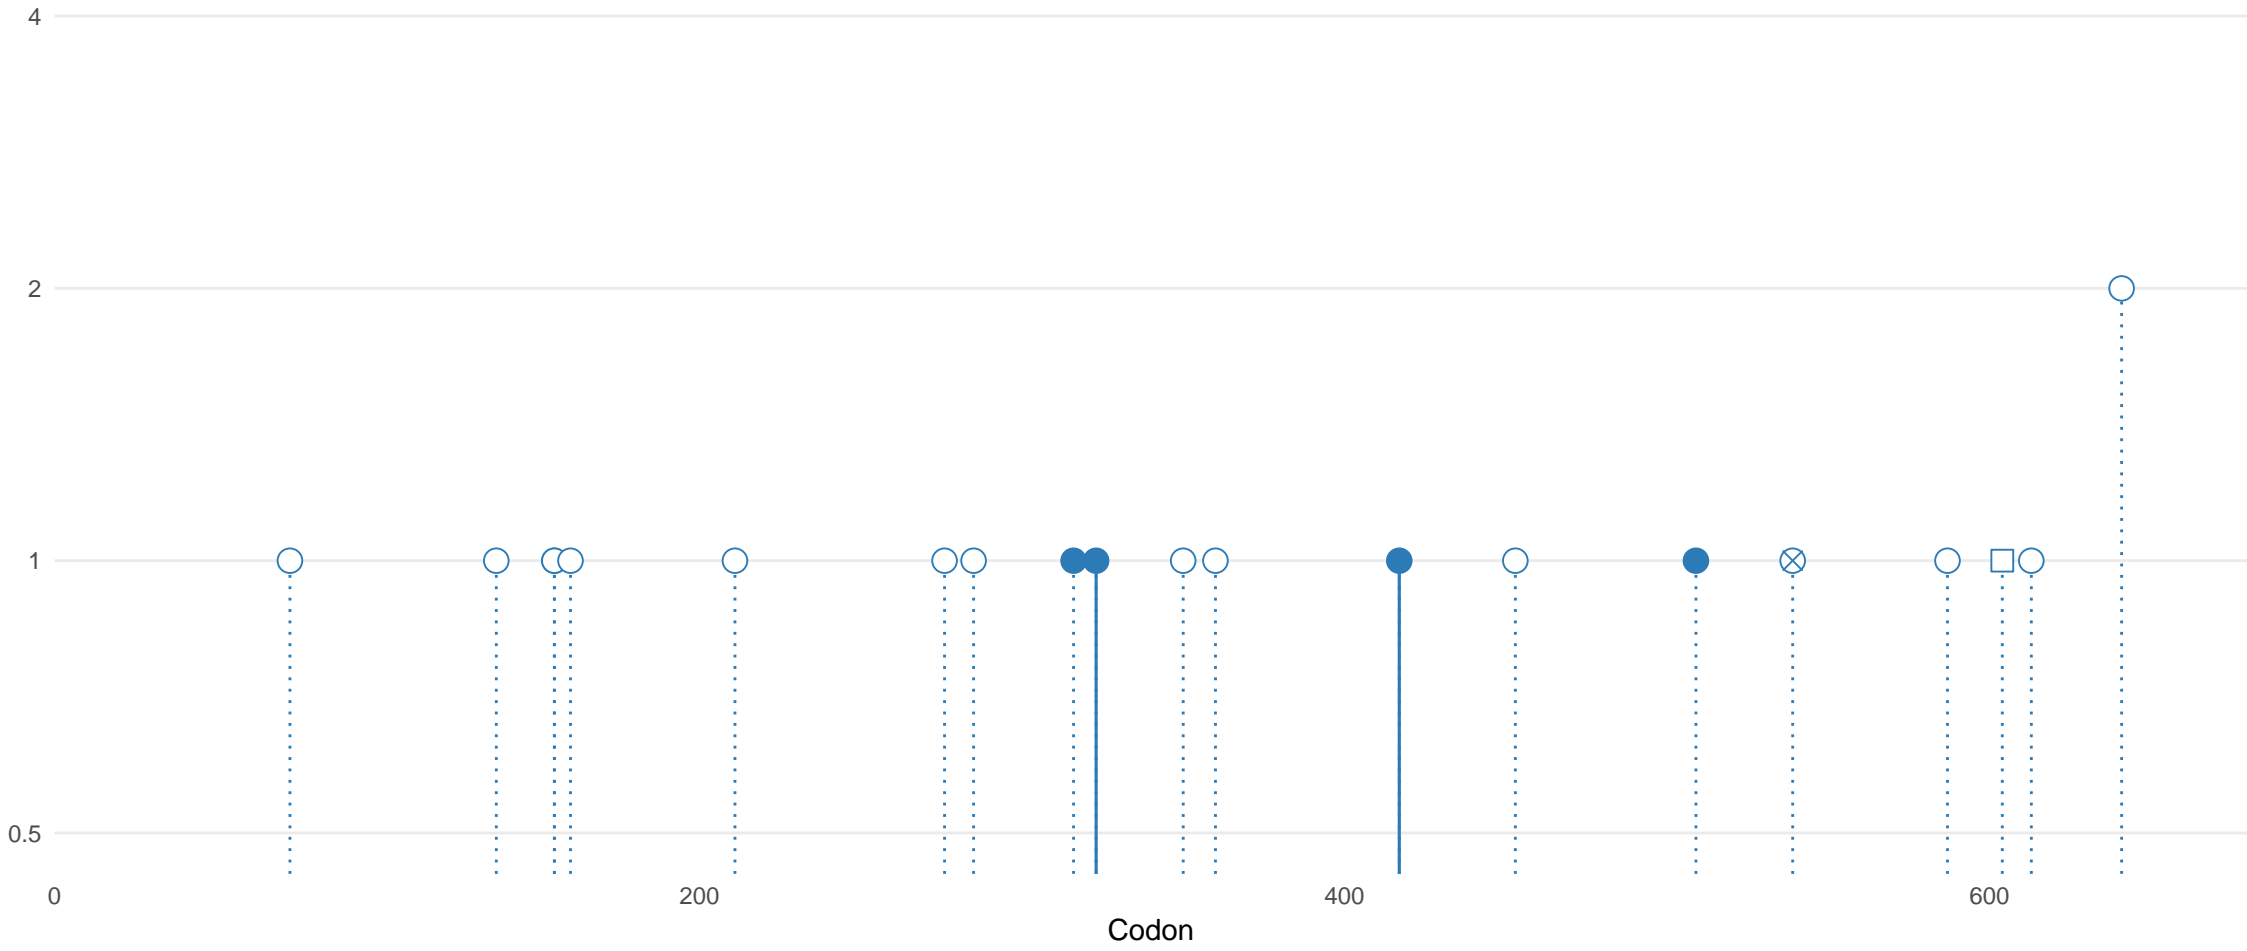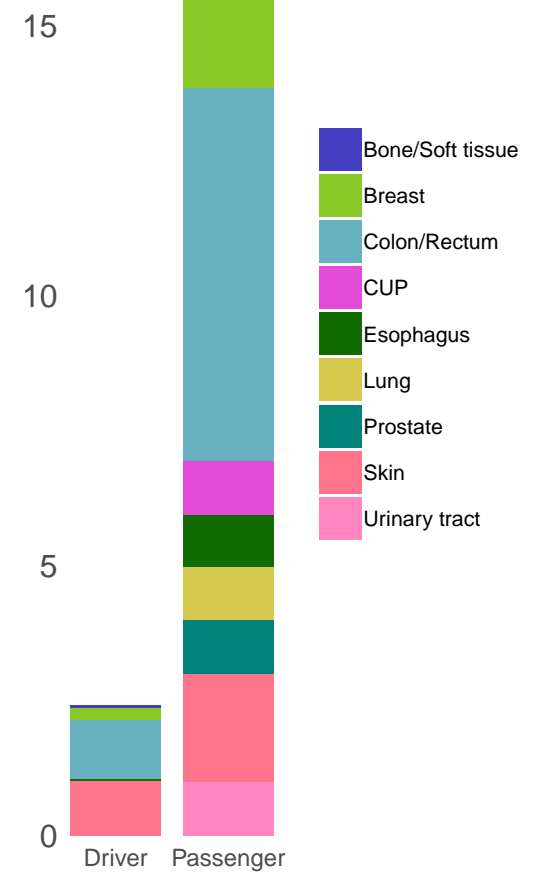

Monoallelic: ○ SNV □ MNV ◇ INDEL in frame ⊗ SNV nonsense ⊠ MNV nonsense ⊞ INDEL out of frame Biallelic/Multihit: ● SNV ■ MNV ◆ INDEL in frame ⊗ SNV nonsense ⊠ MNV nonsense ⊞ INDEL out of frame Hotspot: ● (Red)

# TSC1 Variants

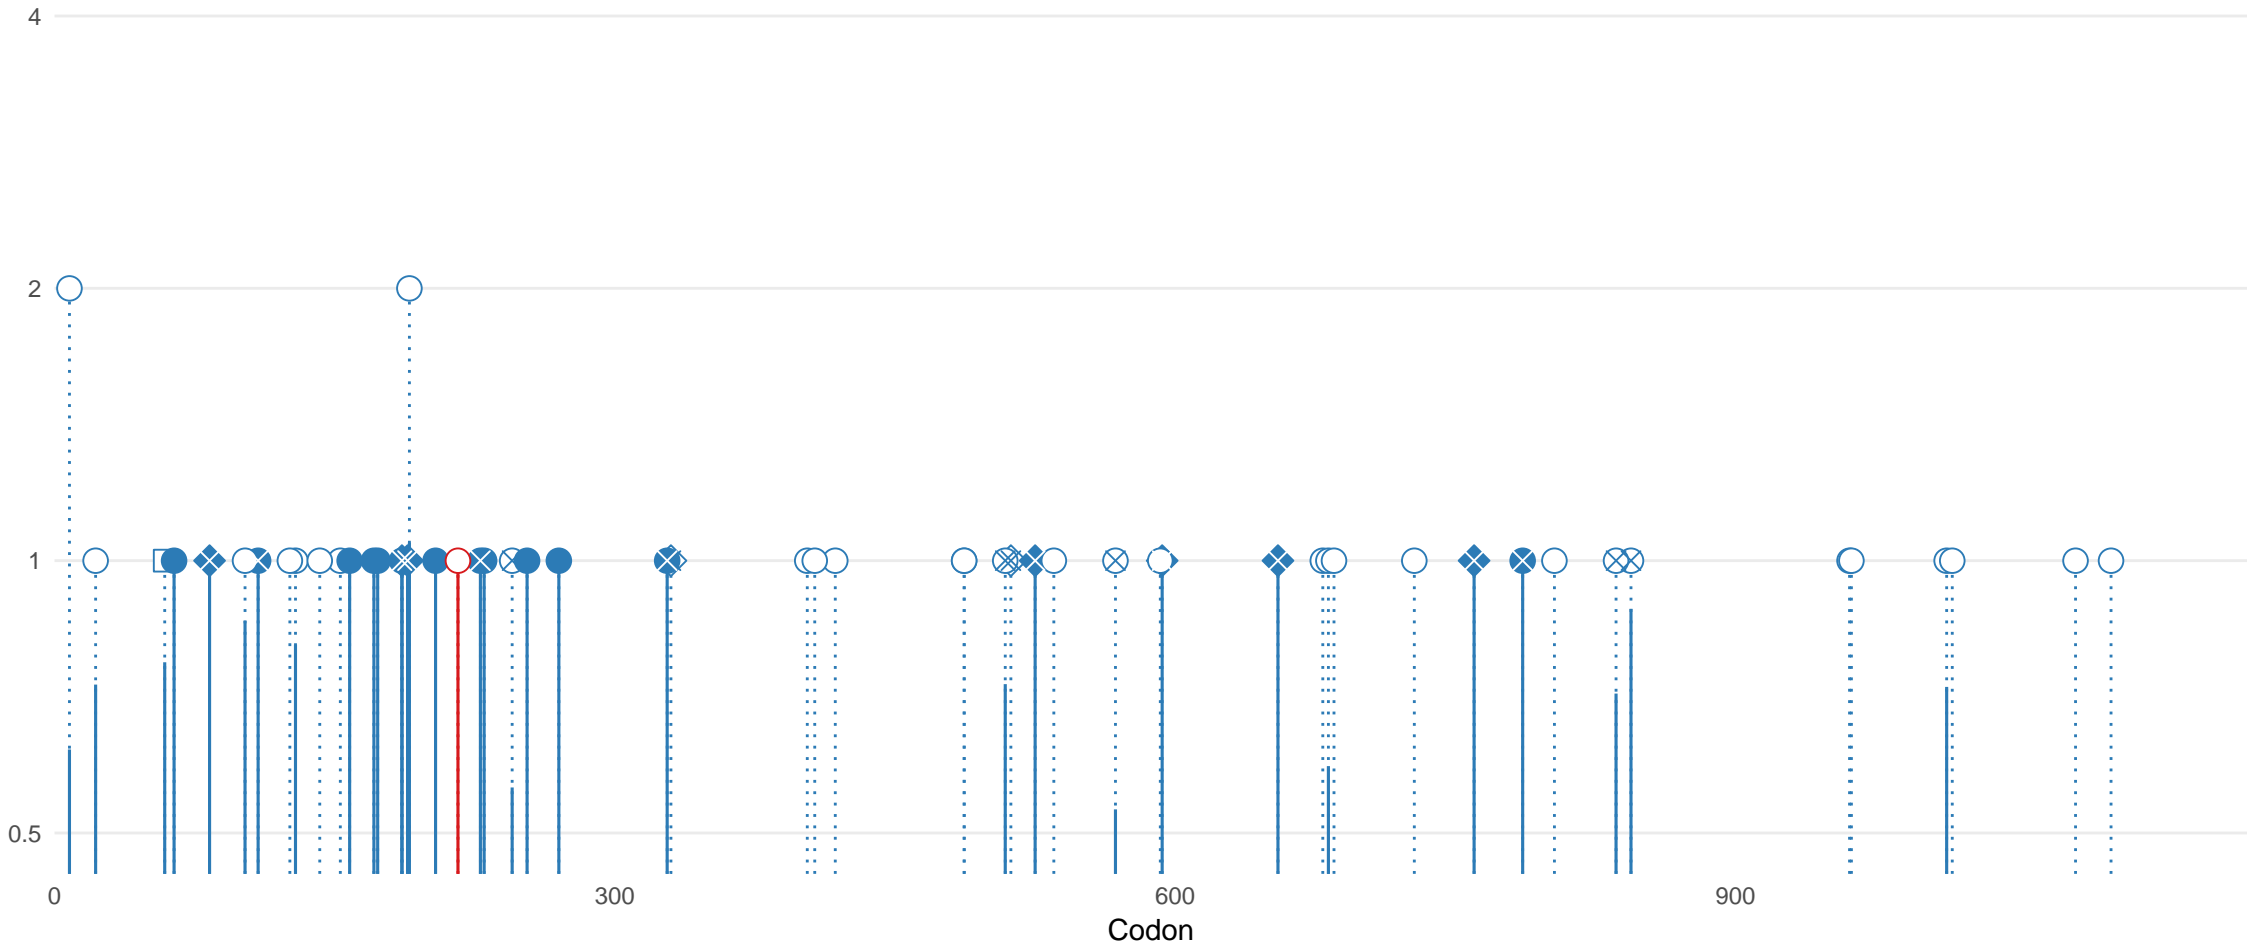

**Monoallelic:** ○ SNV □ MNV ◇ INDEL in frame ⊗ SNV nonsense ⊗ MNV nonsense ⊗ INDEL out of frame  
**Biallelic/Multihit:** ● SNV ■ MNV ◆ INDEL in frame ⊗ SNV nonsense ⊗ MNV nonsense ◆ INDEL out of frame  
**Hotspot:** ●

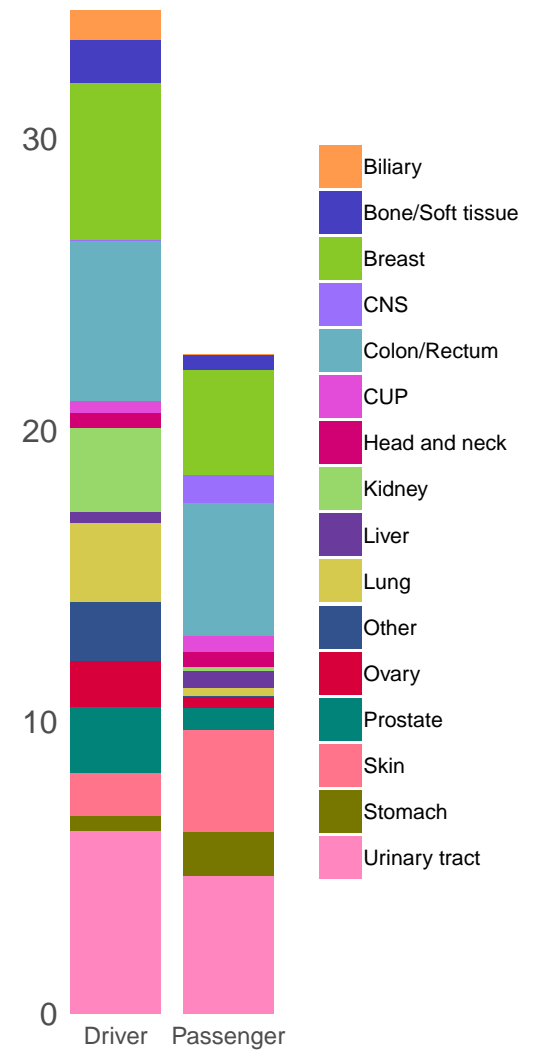

Driver Passenger

# TSC2 Variants

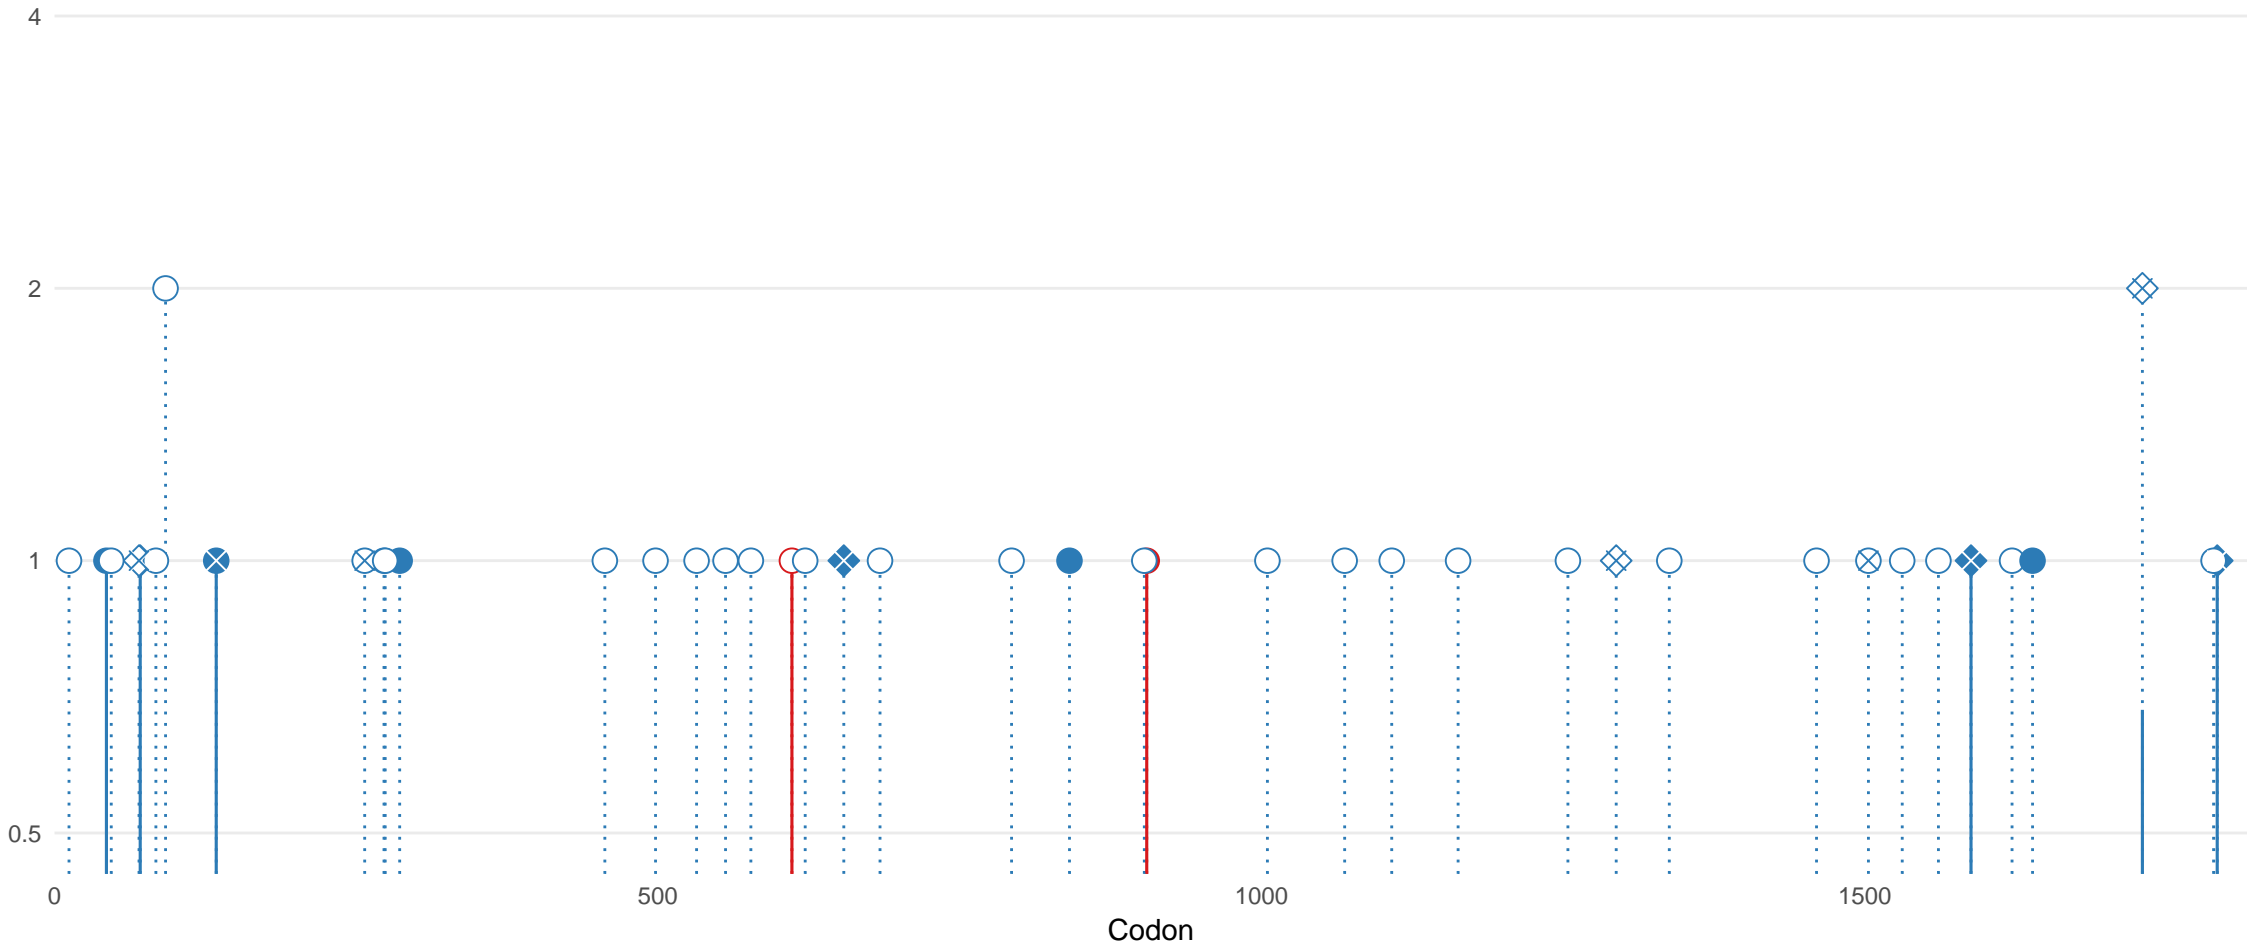

**Monoallelic:** ○ SNV □ MNV ◇ INDEL in frame ⊗ SNV nonsense ⊗ MNV nonsense ⊗ INDEL out of frame  
**Biallelic/Multihit:** ● SNV ■ MNV ◆ INDEL in frame ⊗ SNV nonsense ⊗ MNV nonsense ◆ INDEL out of frame  
**Hotspot:** ●

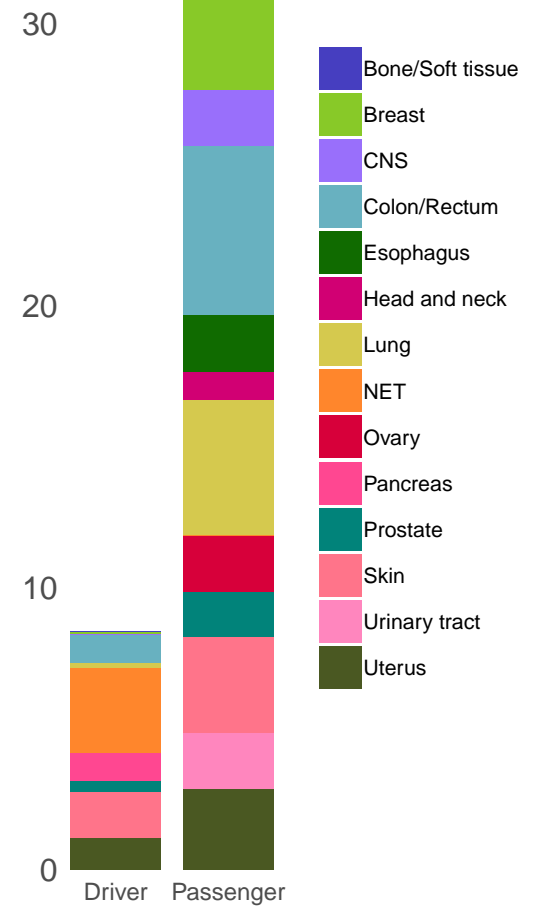

Driver Passenger

# UBR5 Variants

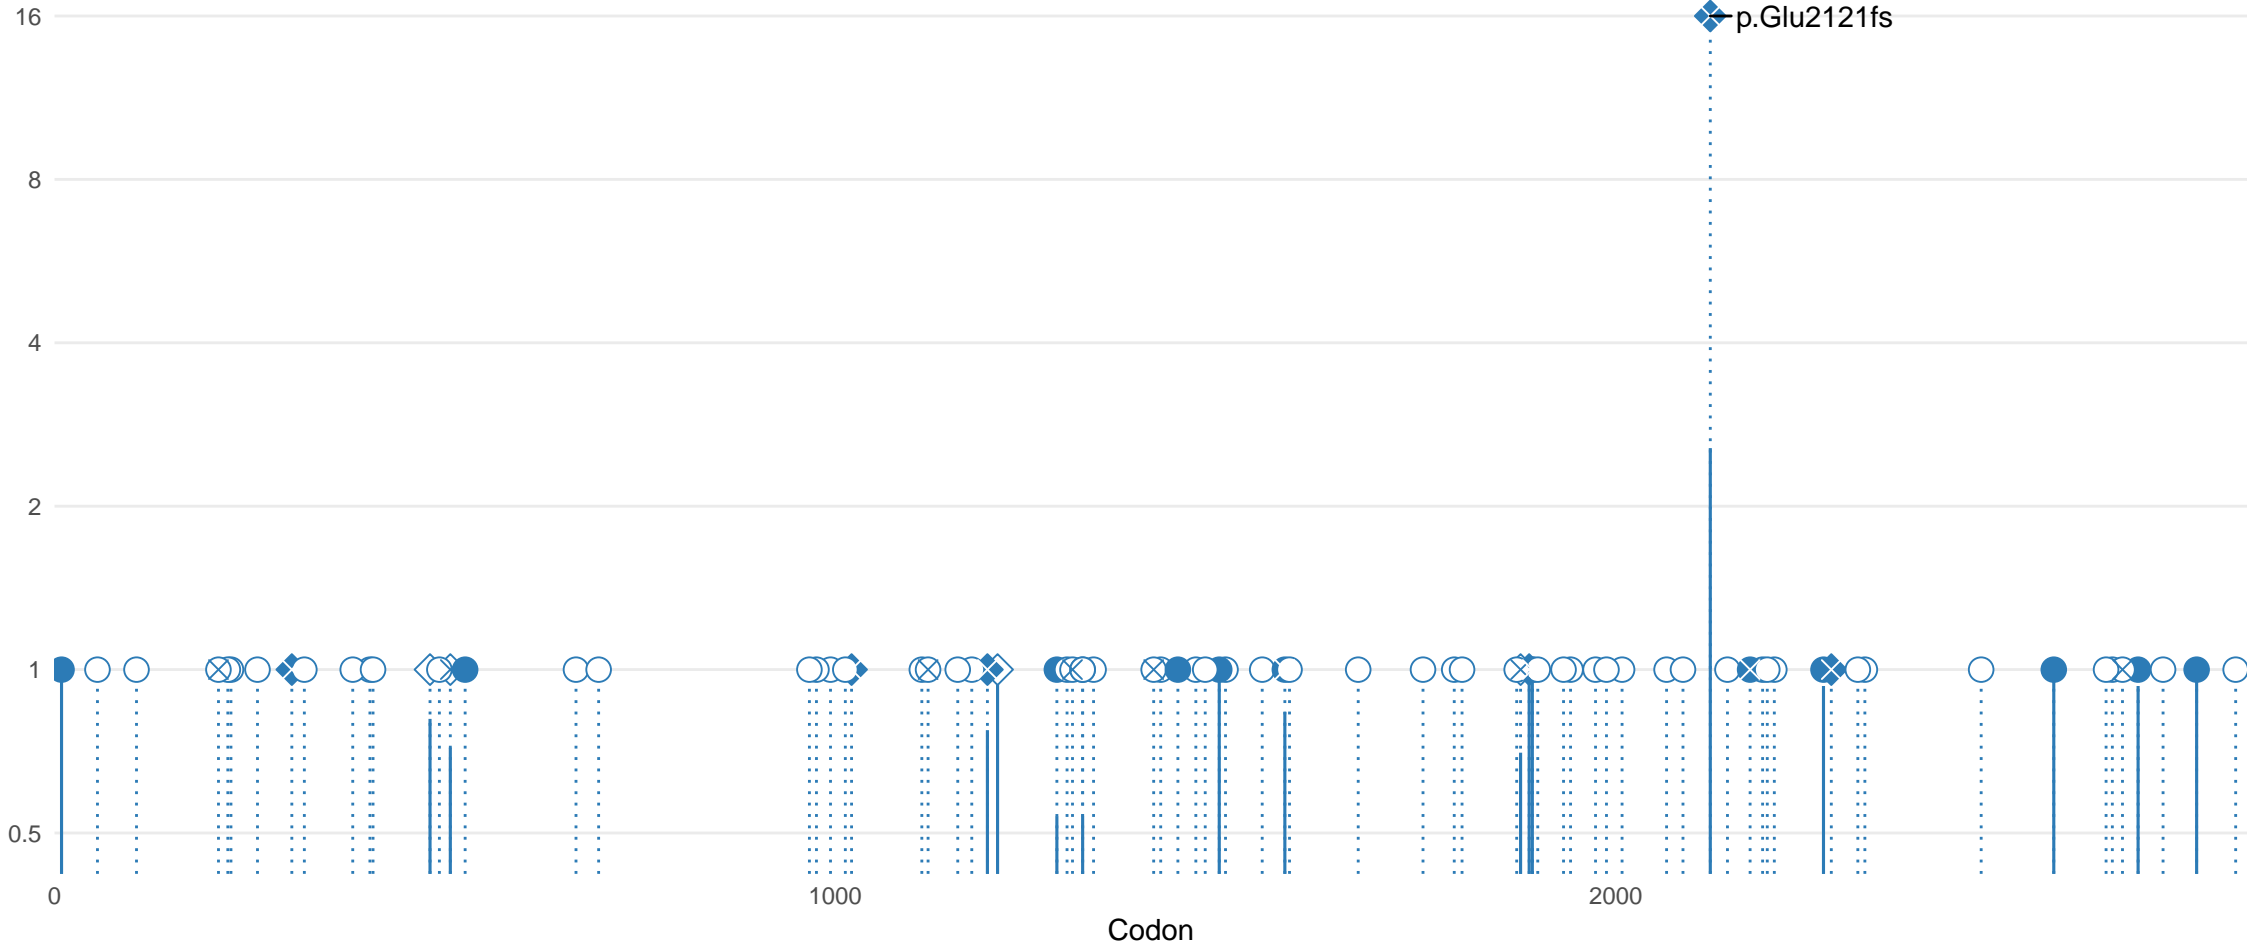

**Monoallelic:** ○ SNV □ MNV ◇ INDEL in frame ⊗ SNV nonsense ⊗ MNV nonsense ⊗ INDEL out of frame  
**Biallelic/Multihit:** ● SNV ■ MNV ◆ INDEL in frame ⊗ SNV nonsense ⊗ MNV nonsense ◆ INDEL out of frame  
**Hotspot:** ●

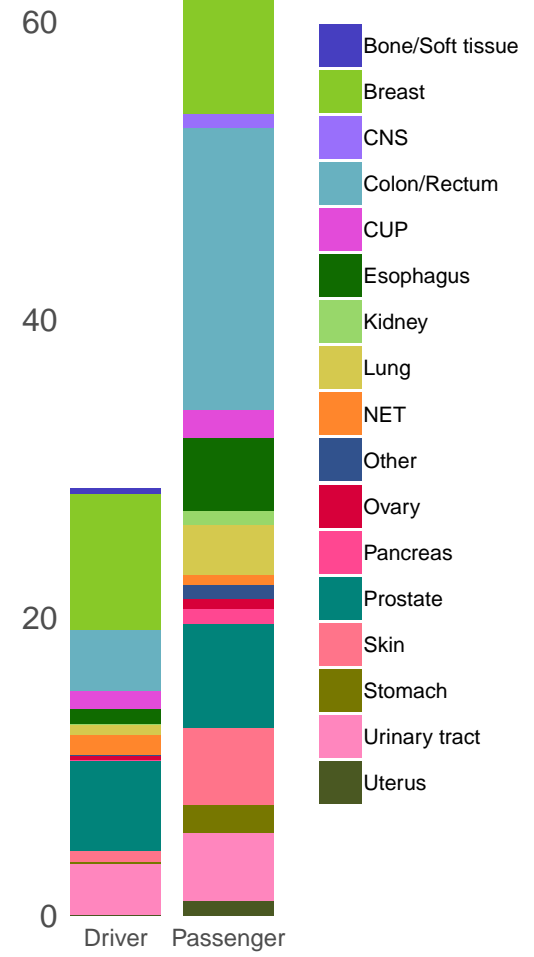

# VHL Variants

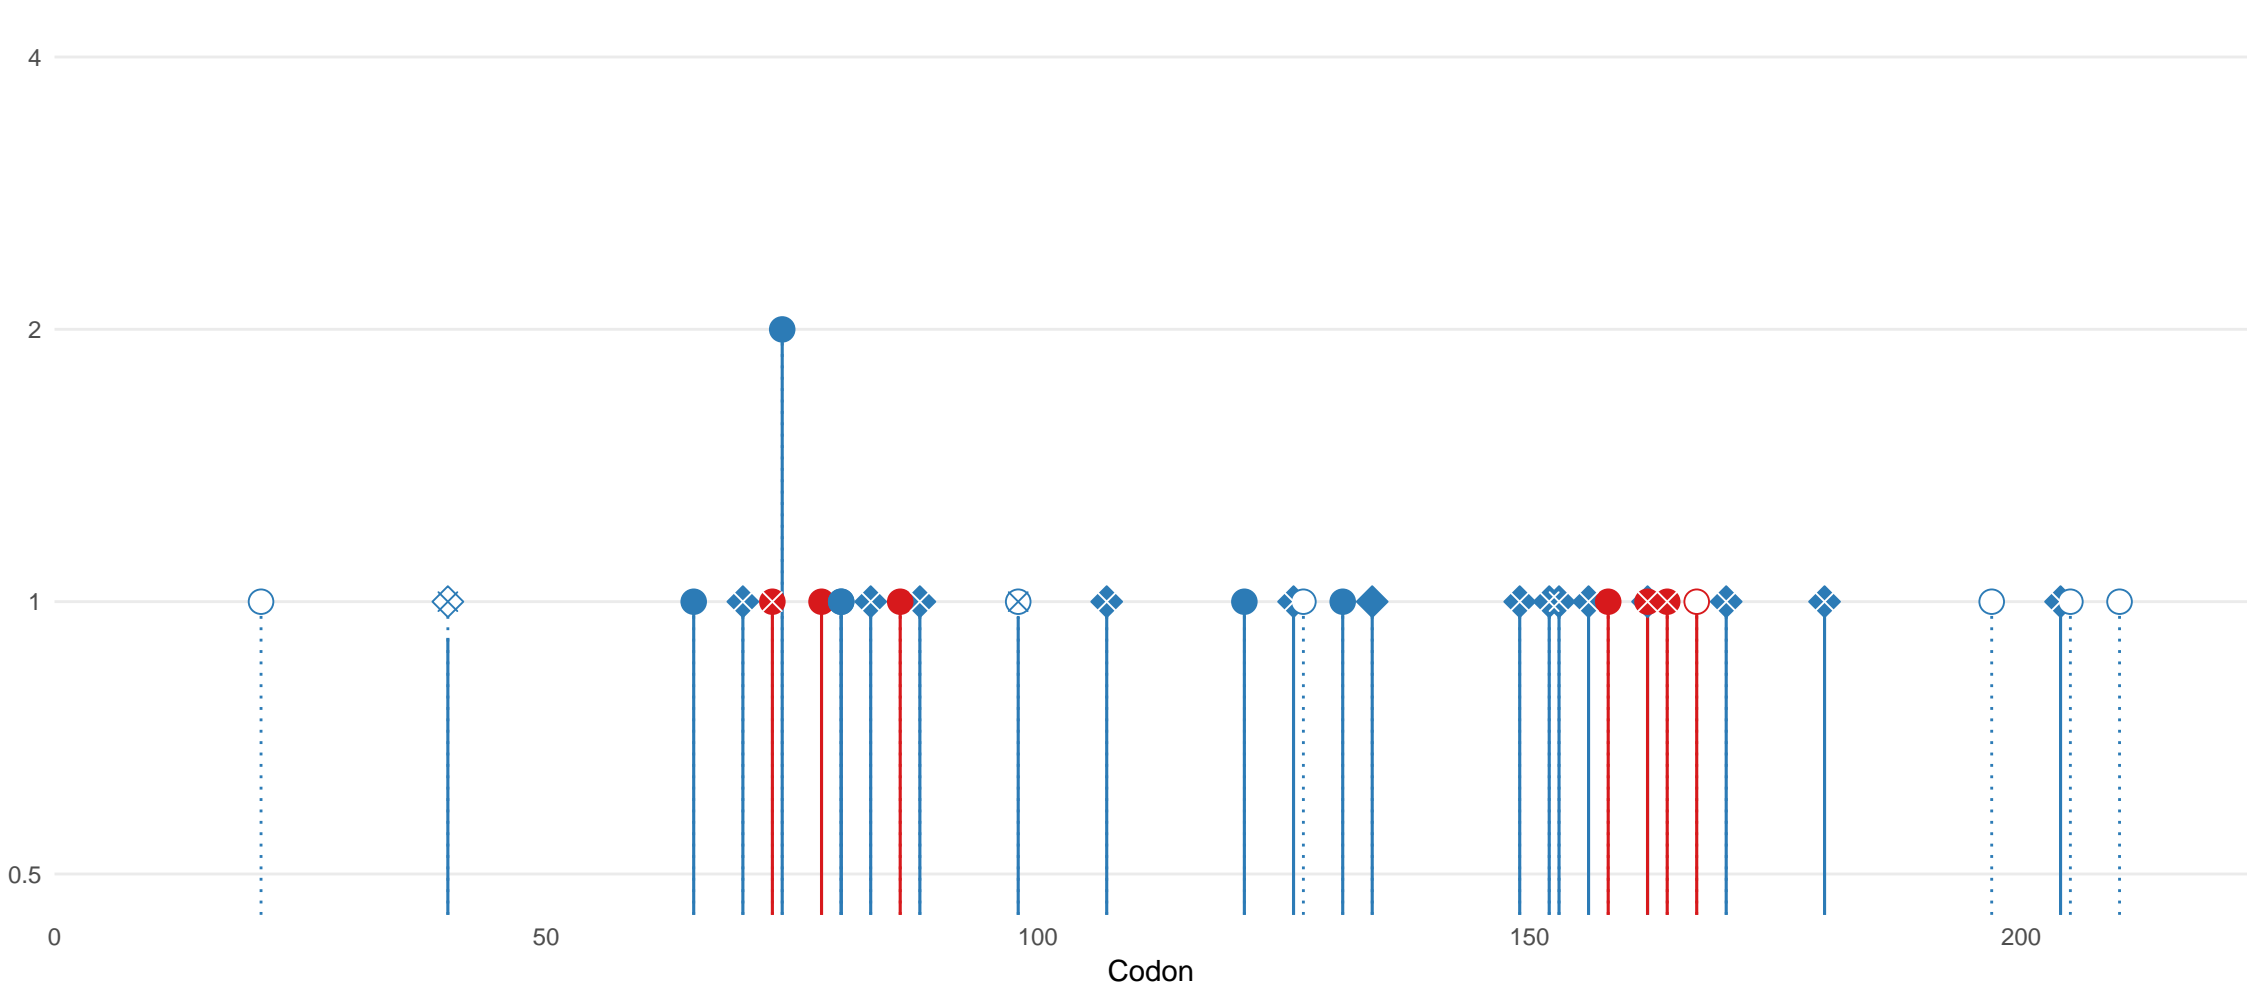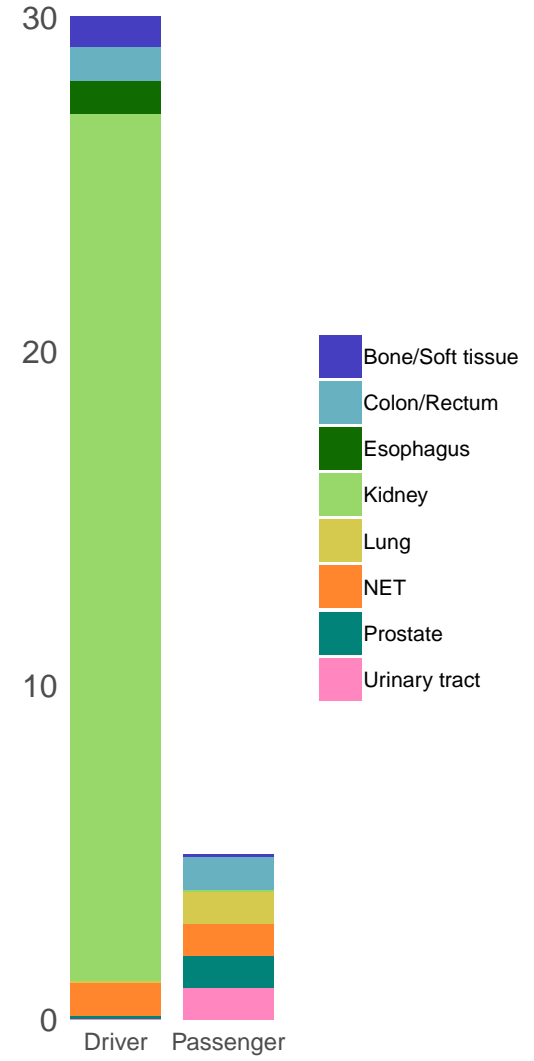

Monoallelic: ○ SNV □ MNV ◇ INDEL in frame ⊗ SNV nonsense ⊠ MNV nonsense ⊞ INDEL out of frame Biallelic/Multihit: ● SNV ■ MNV ◆ INDEL in frame ⊗ SNV nonsense ⊠ MNV nonsense ⊞ INDEL out of frame Hotspot: ● (Red)

# ZFHX3 Variants

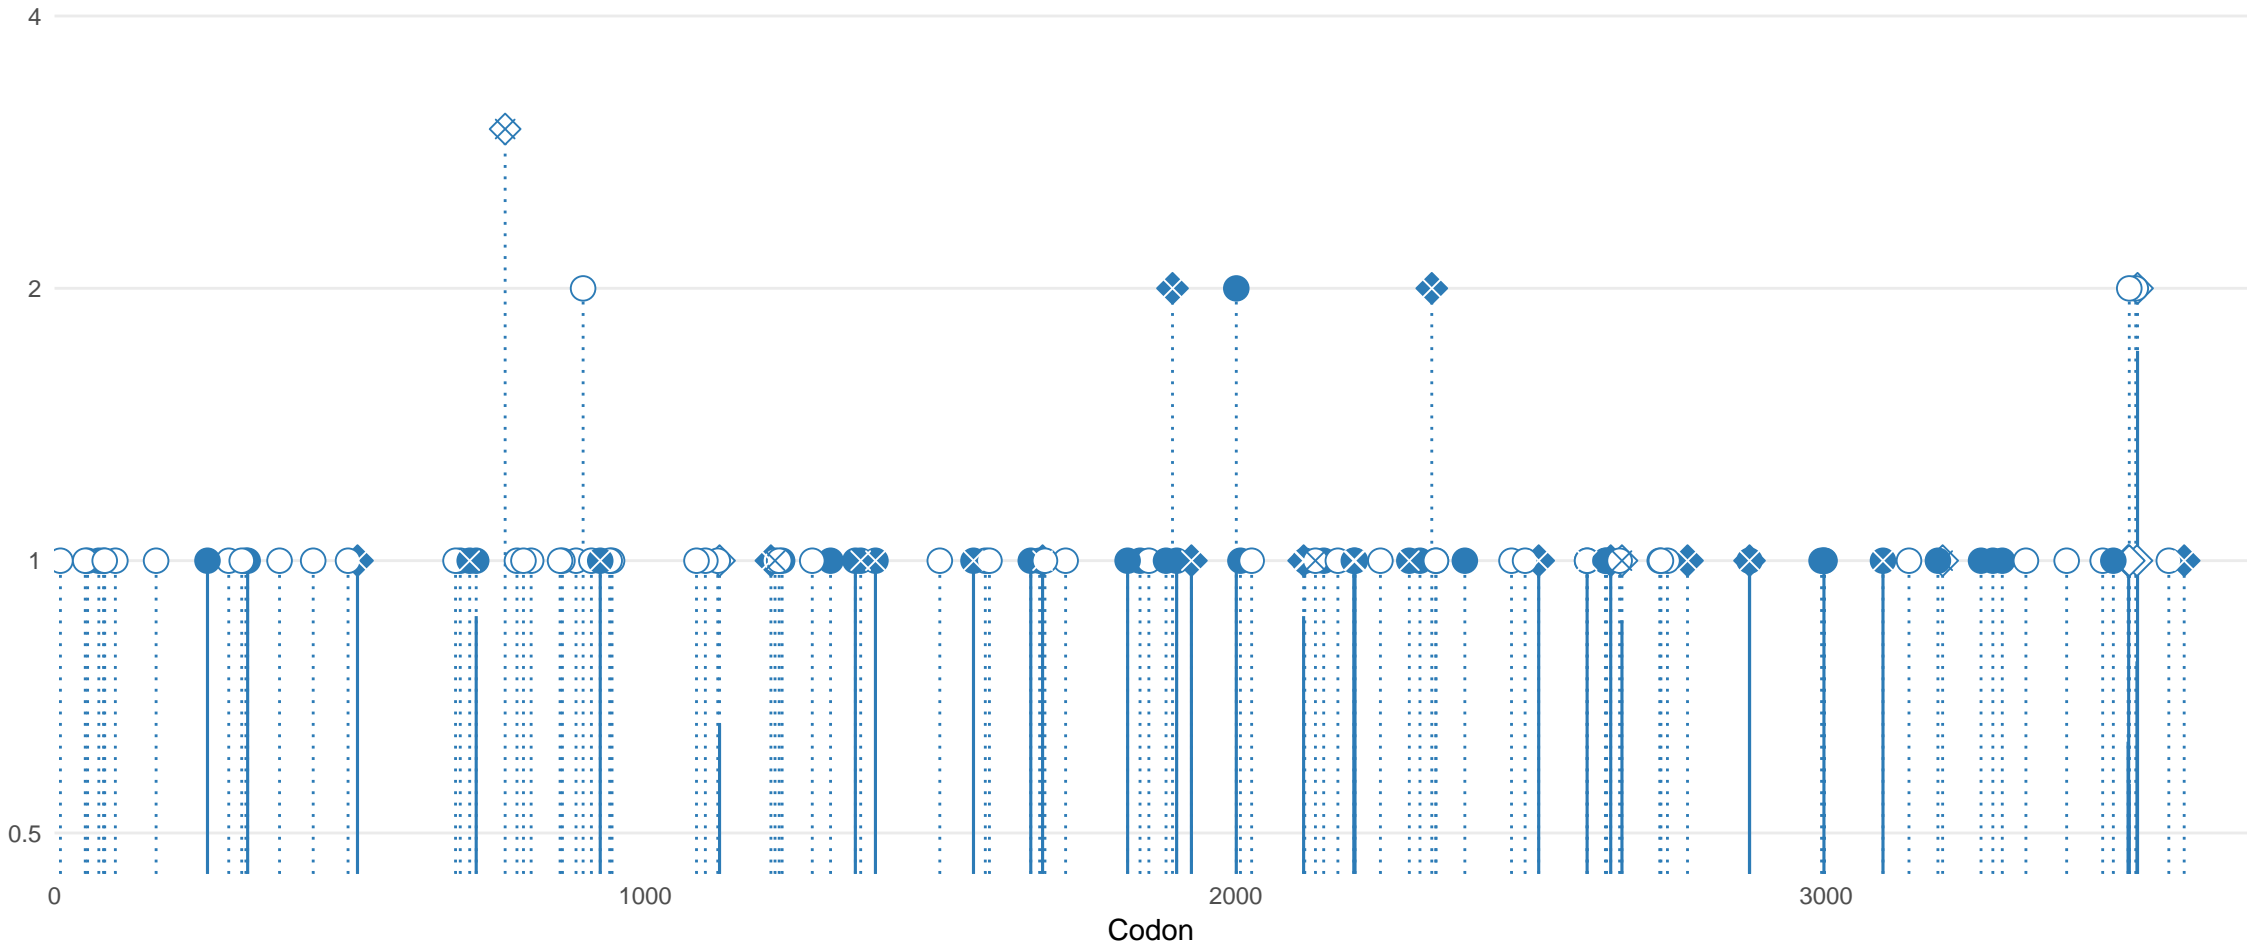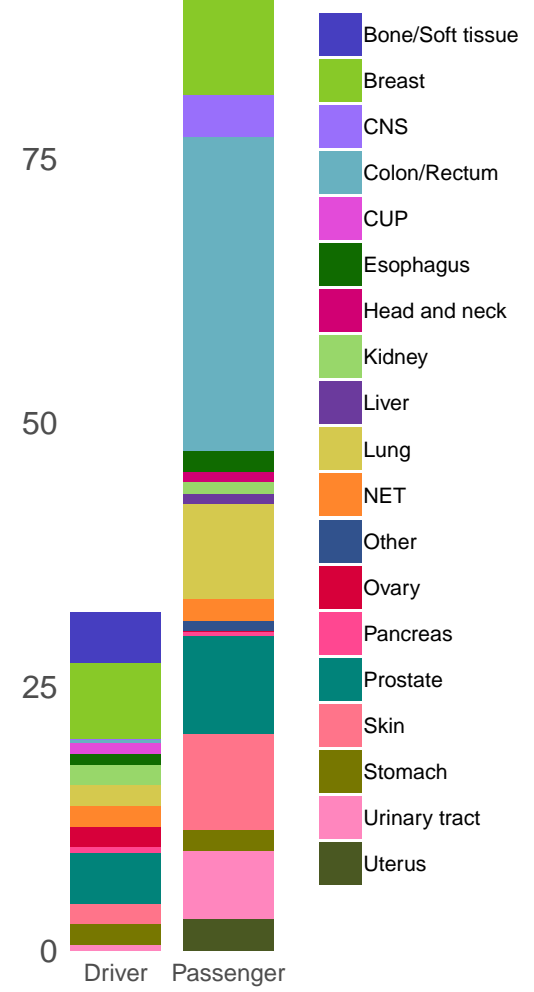

**Monoallelic:** ○ SNV □ MNV ◇ INDEL in frame ⊗ SNV nonsense ⊗ MNV nonsense ⊗ INDEL out of frame  
**Biallelic/Multihit:** ● SNV ■ MNV ◆ INDEL in frame ⊗ SNV nonsense ⊗ MNV nonsense ◆ INDEL out of frame  
**Hotspot:** ●

# ZFP36L1 Variants

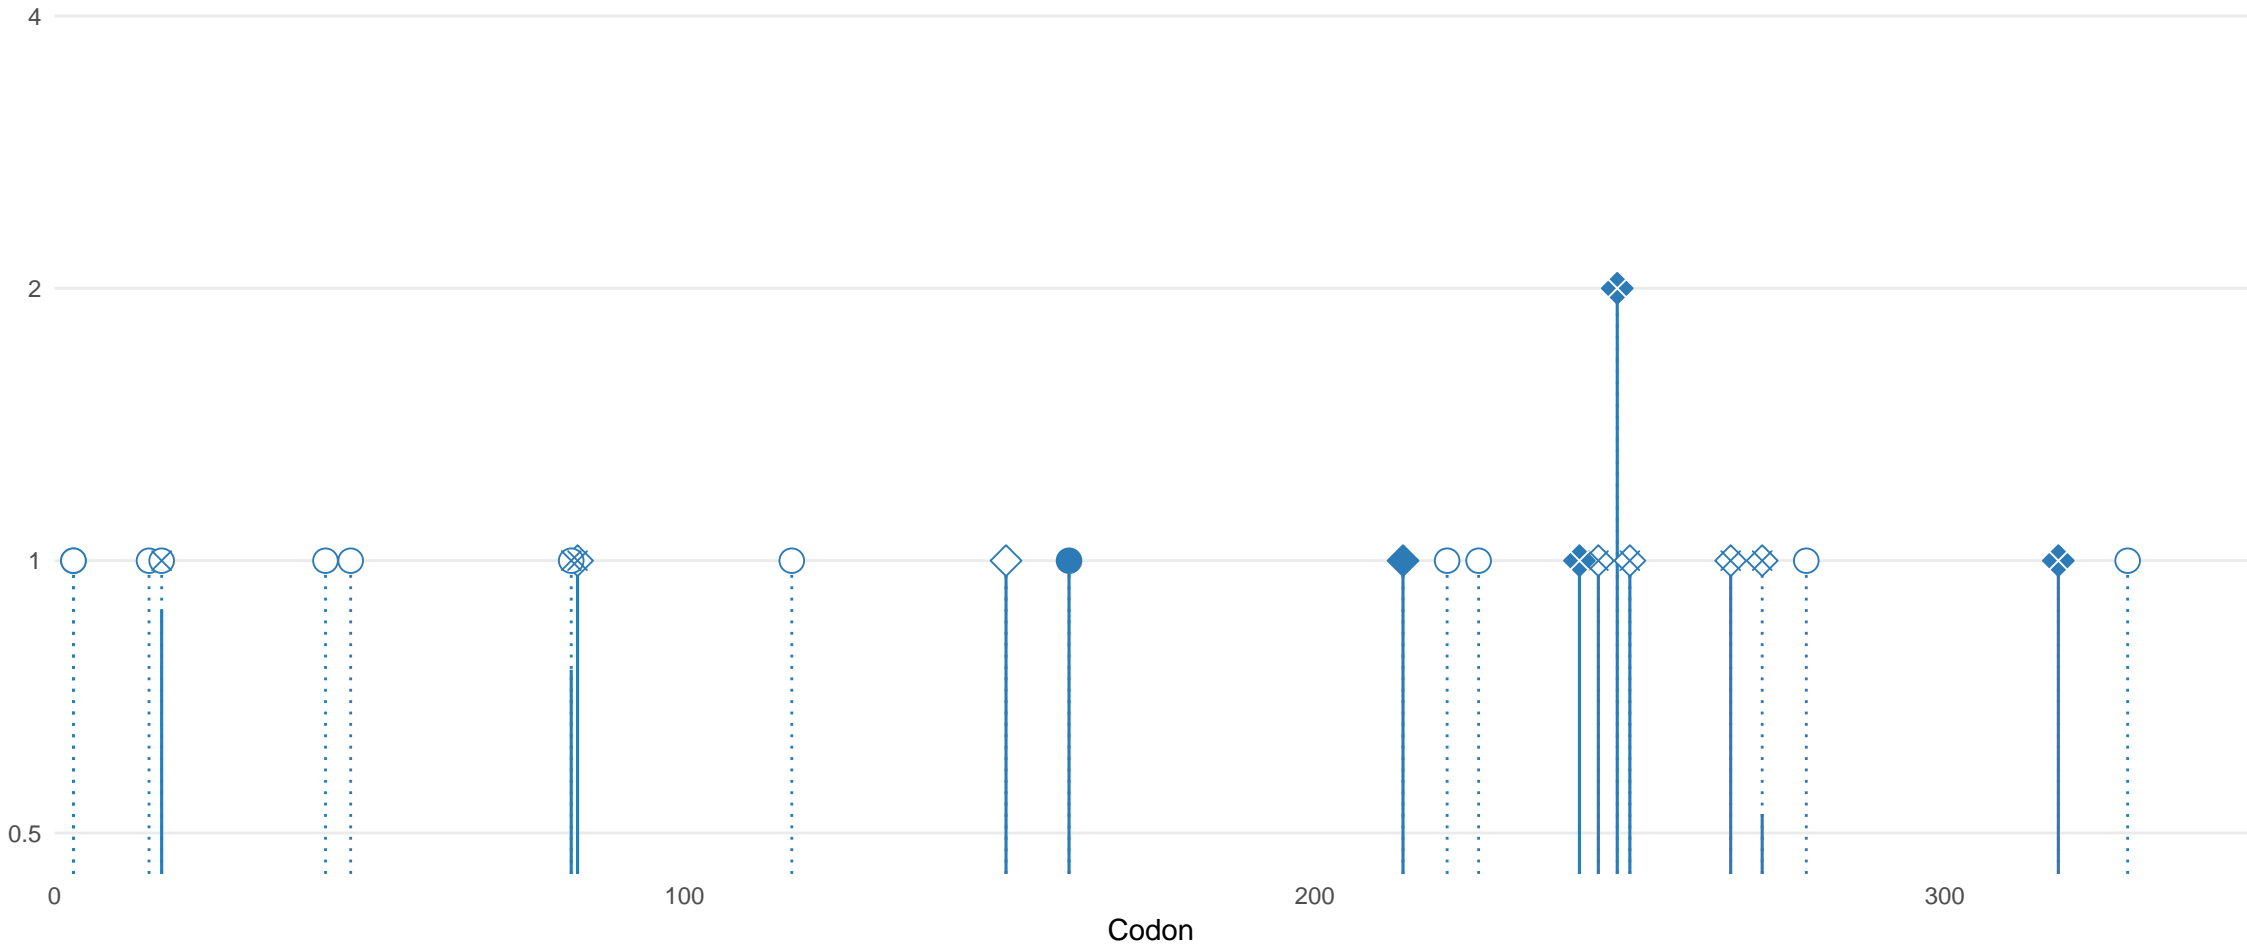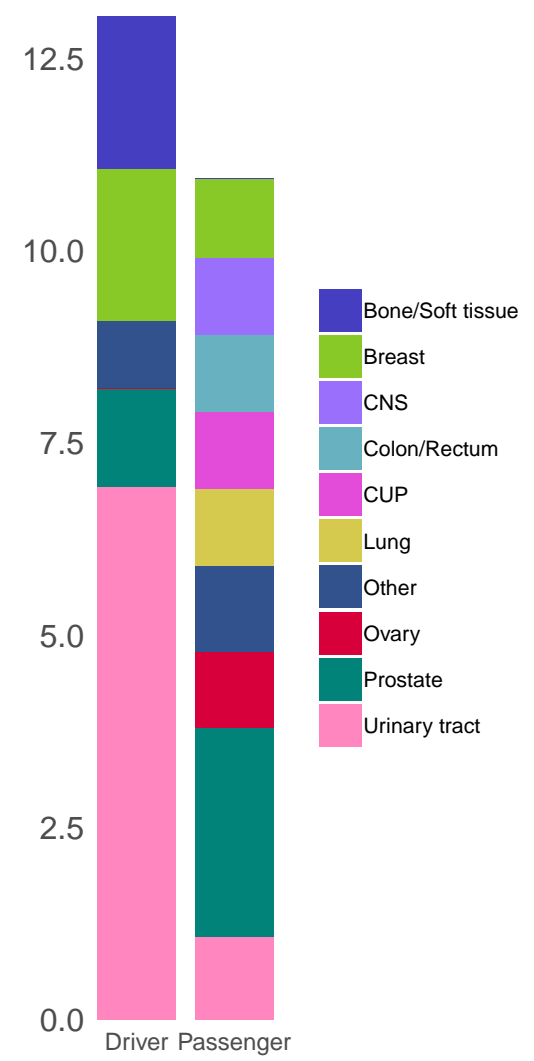

Monoallelic: ○ SNV □ MNV ◇ INDEL in frame ⊗ SNV nonsense ⊗ MNV nonsense ⊗ INDEL out of frame Biallelic/Multihit: ● SNV ■ MNV ◆ INDEL in frame ⊗ SNV nonsense ⊗ MNV nonsense ⊗ INDEL out of frame Hotspot: ●



# ZFP36L2 Variants

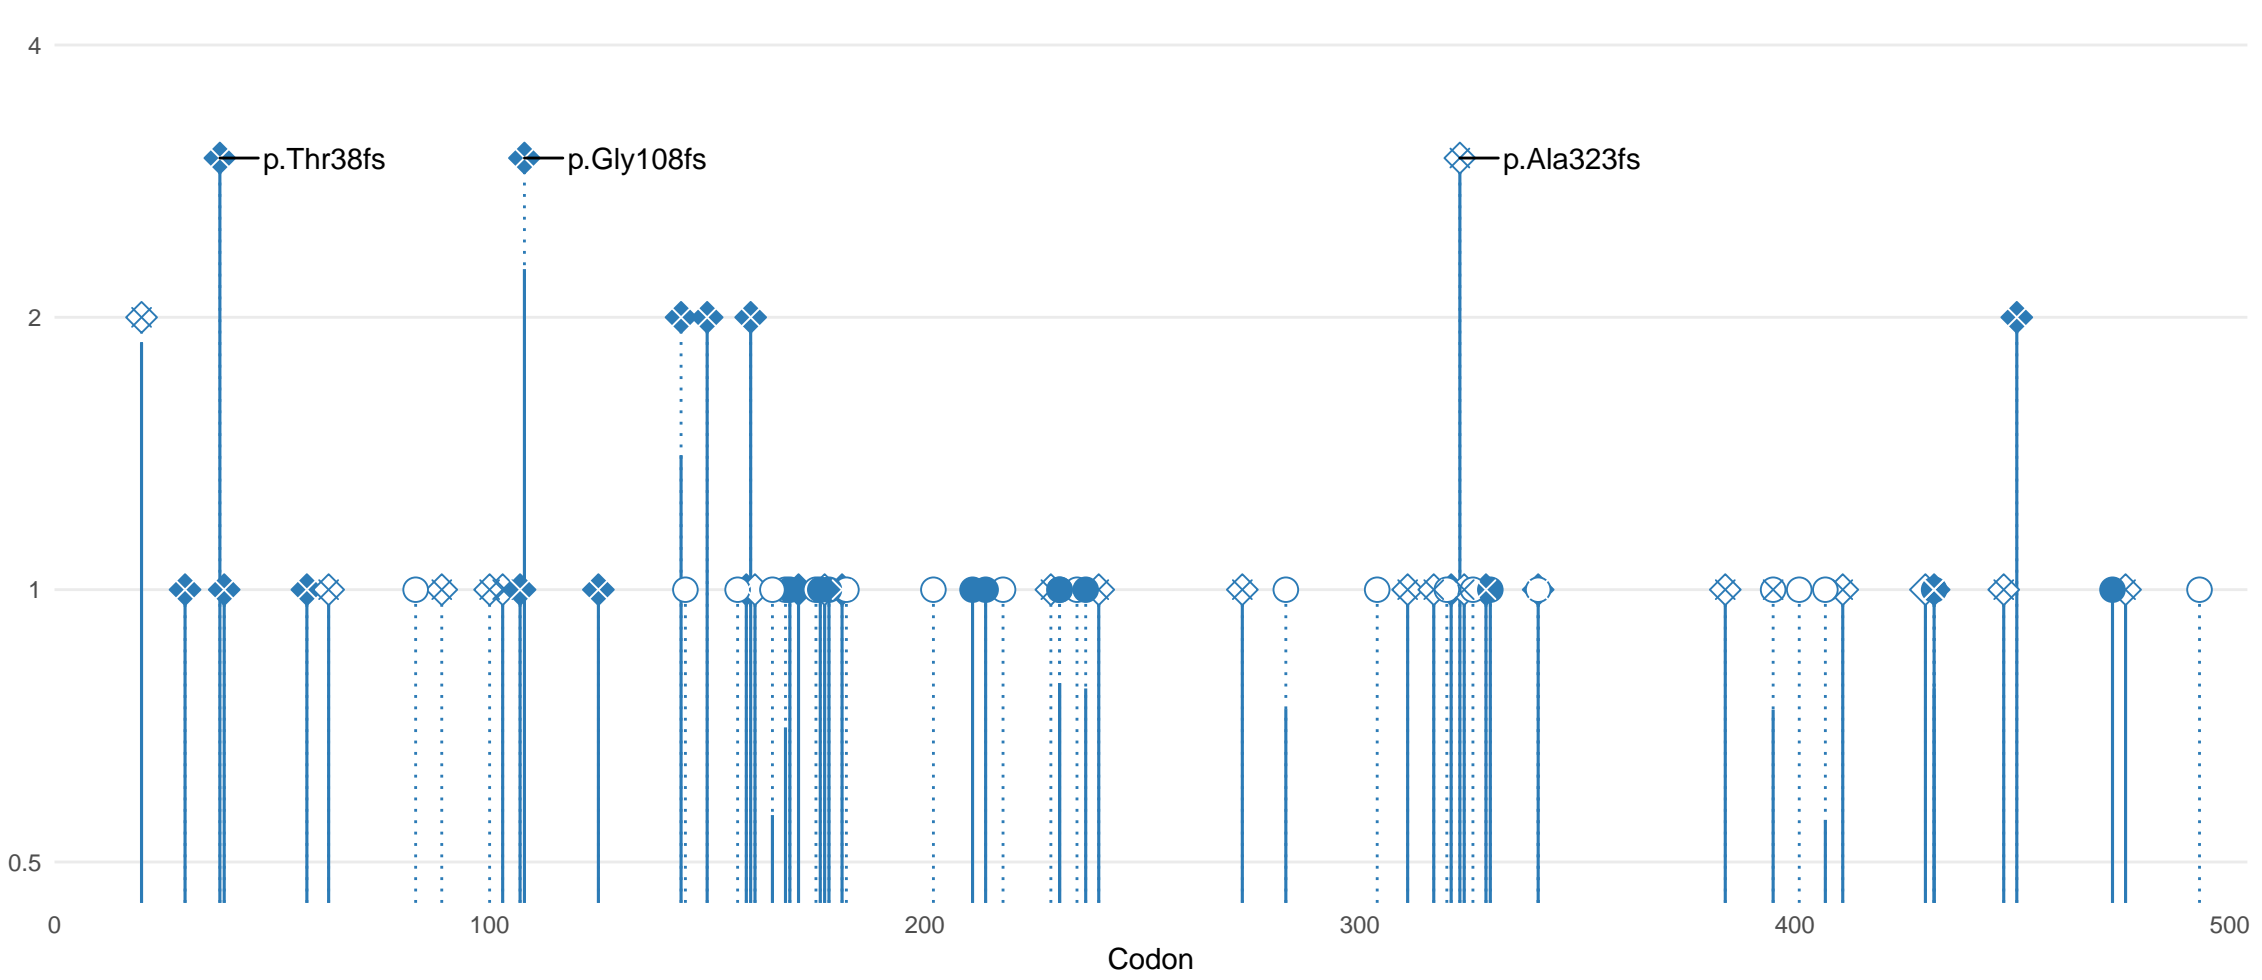

**Monoallelic:** ○ SNV □ MNV ◇ INDEL in frame ⊗ SNV nonsense ⊗ MNV nonsense ⊗ INDEL out of frame  
**Biallelic/Multihit:** ● SNV ■ MNV ◆ INDEL in frame ⊗ SNV nonsense ⊗ MNV nonsense ◆ INDEL out of frame  
**Hotspot:** ●

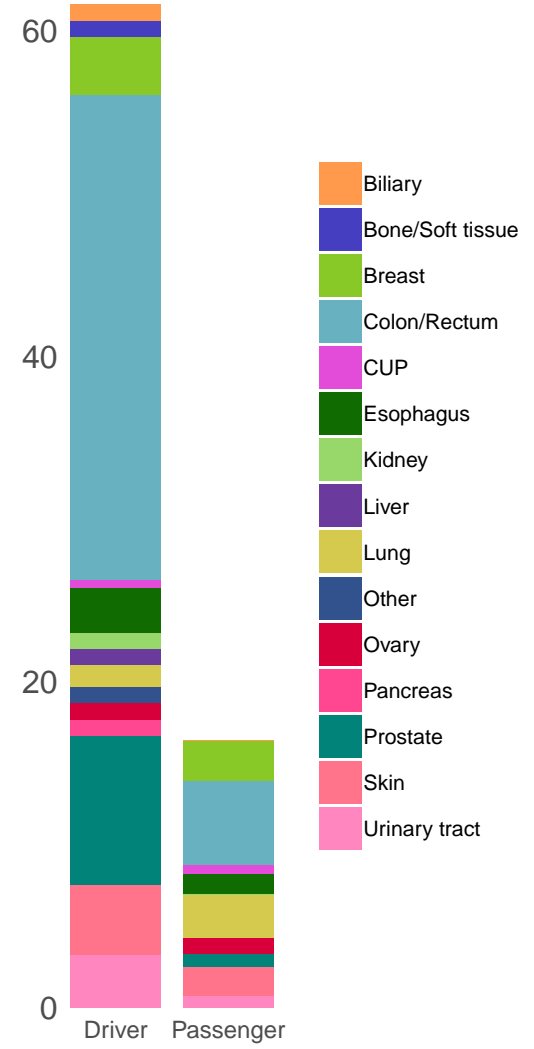

Driver Passenger

# ZFPM1 Variants

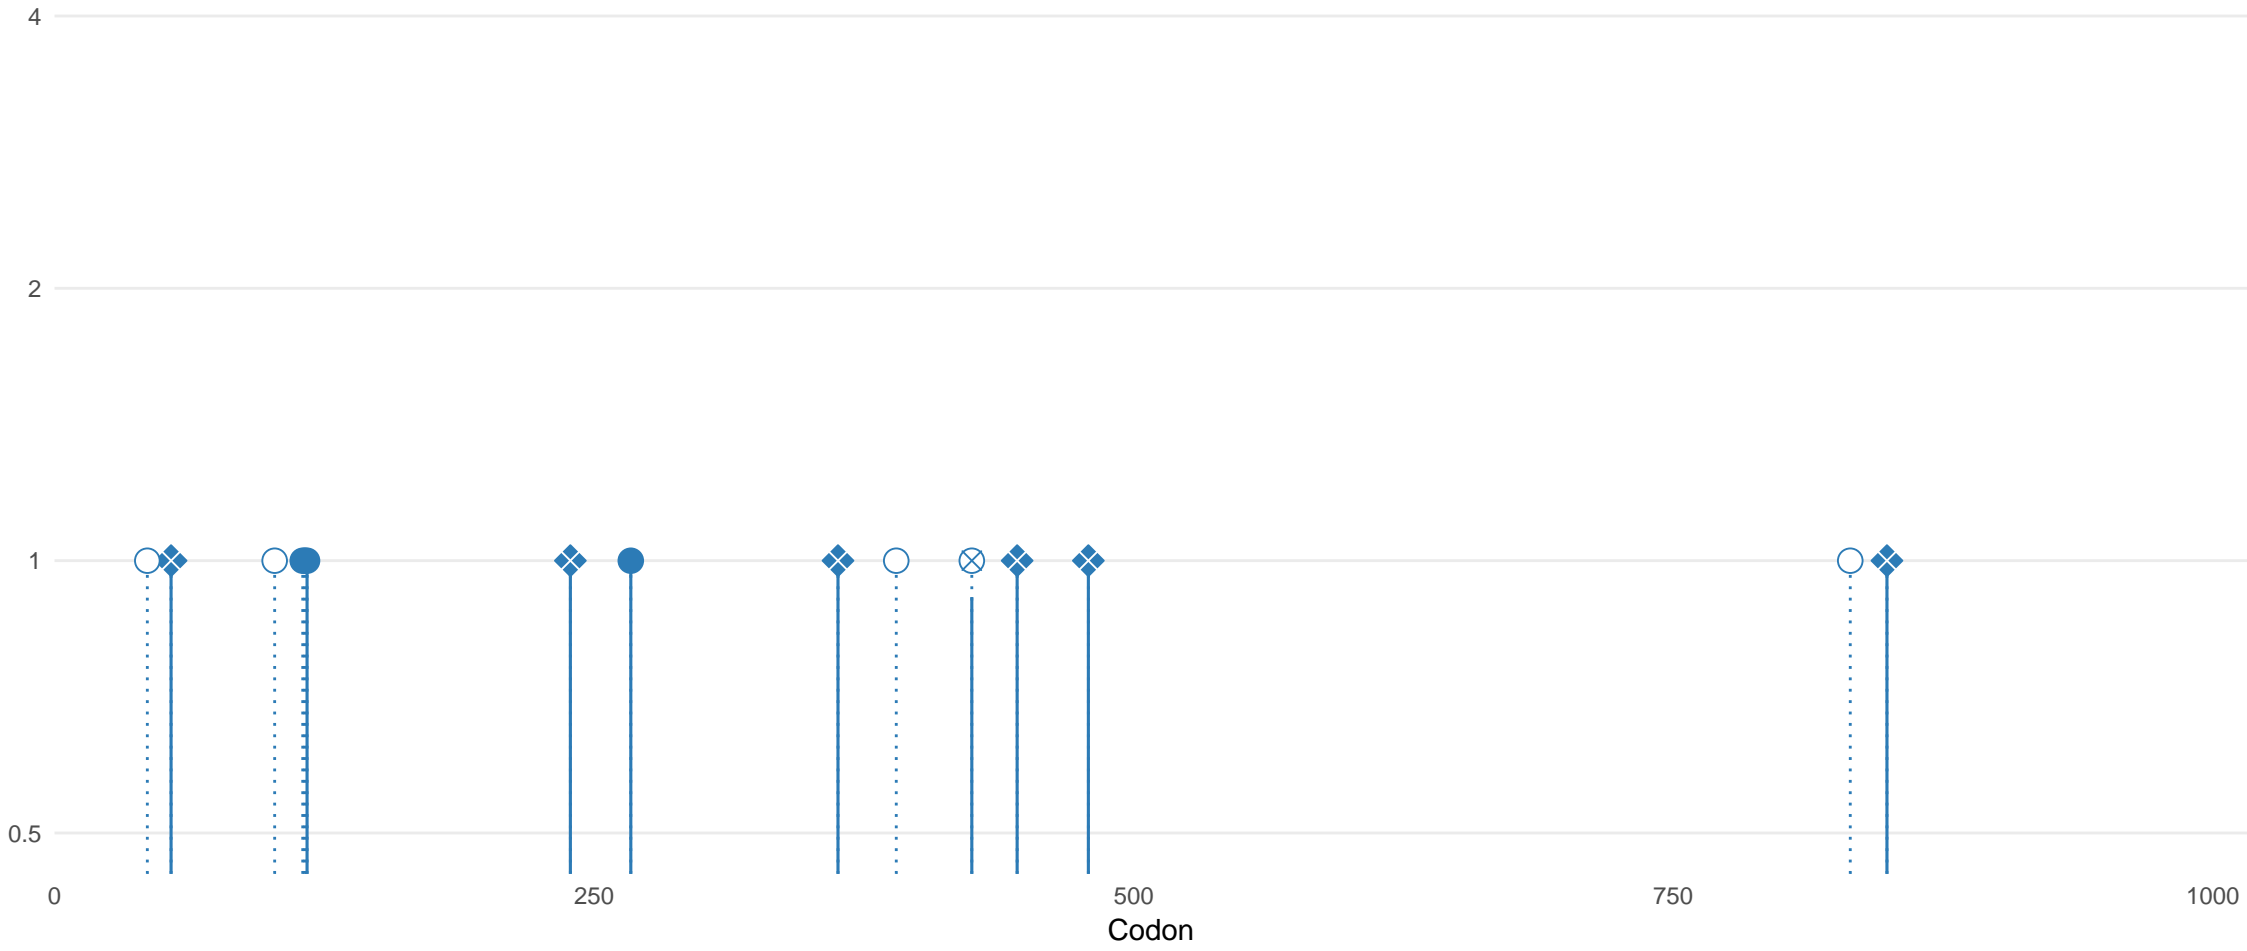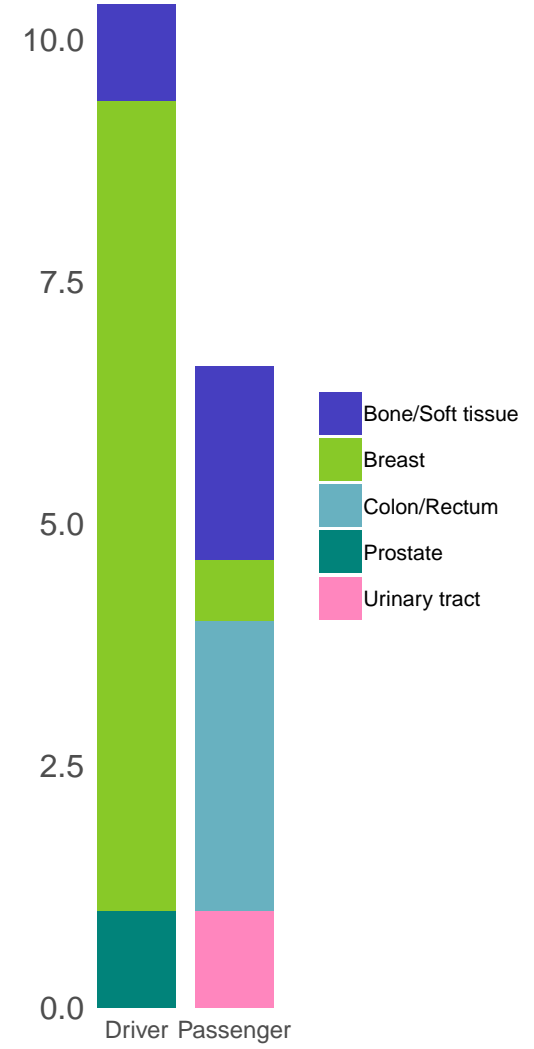

Monoallelic: ○ SNV □ MNV ◇ INDEL in frame ⊗ SNV nonsense ⊠ MNV nonsense ⊞ INDEL out of frame  
 Biallelic/Multihit: ● SNV ■ MNV ◆ INDEL in frame ⊗ SNV nonsense ⊠ MNV nonsense ◆ INDEL out of frame  
 Hotspot: ●

# ZFX Variants

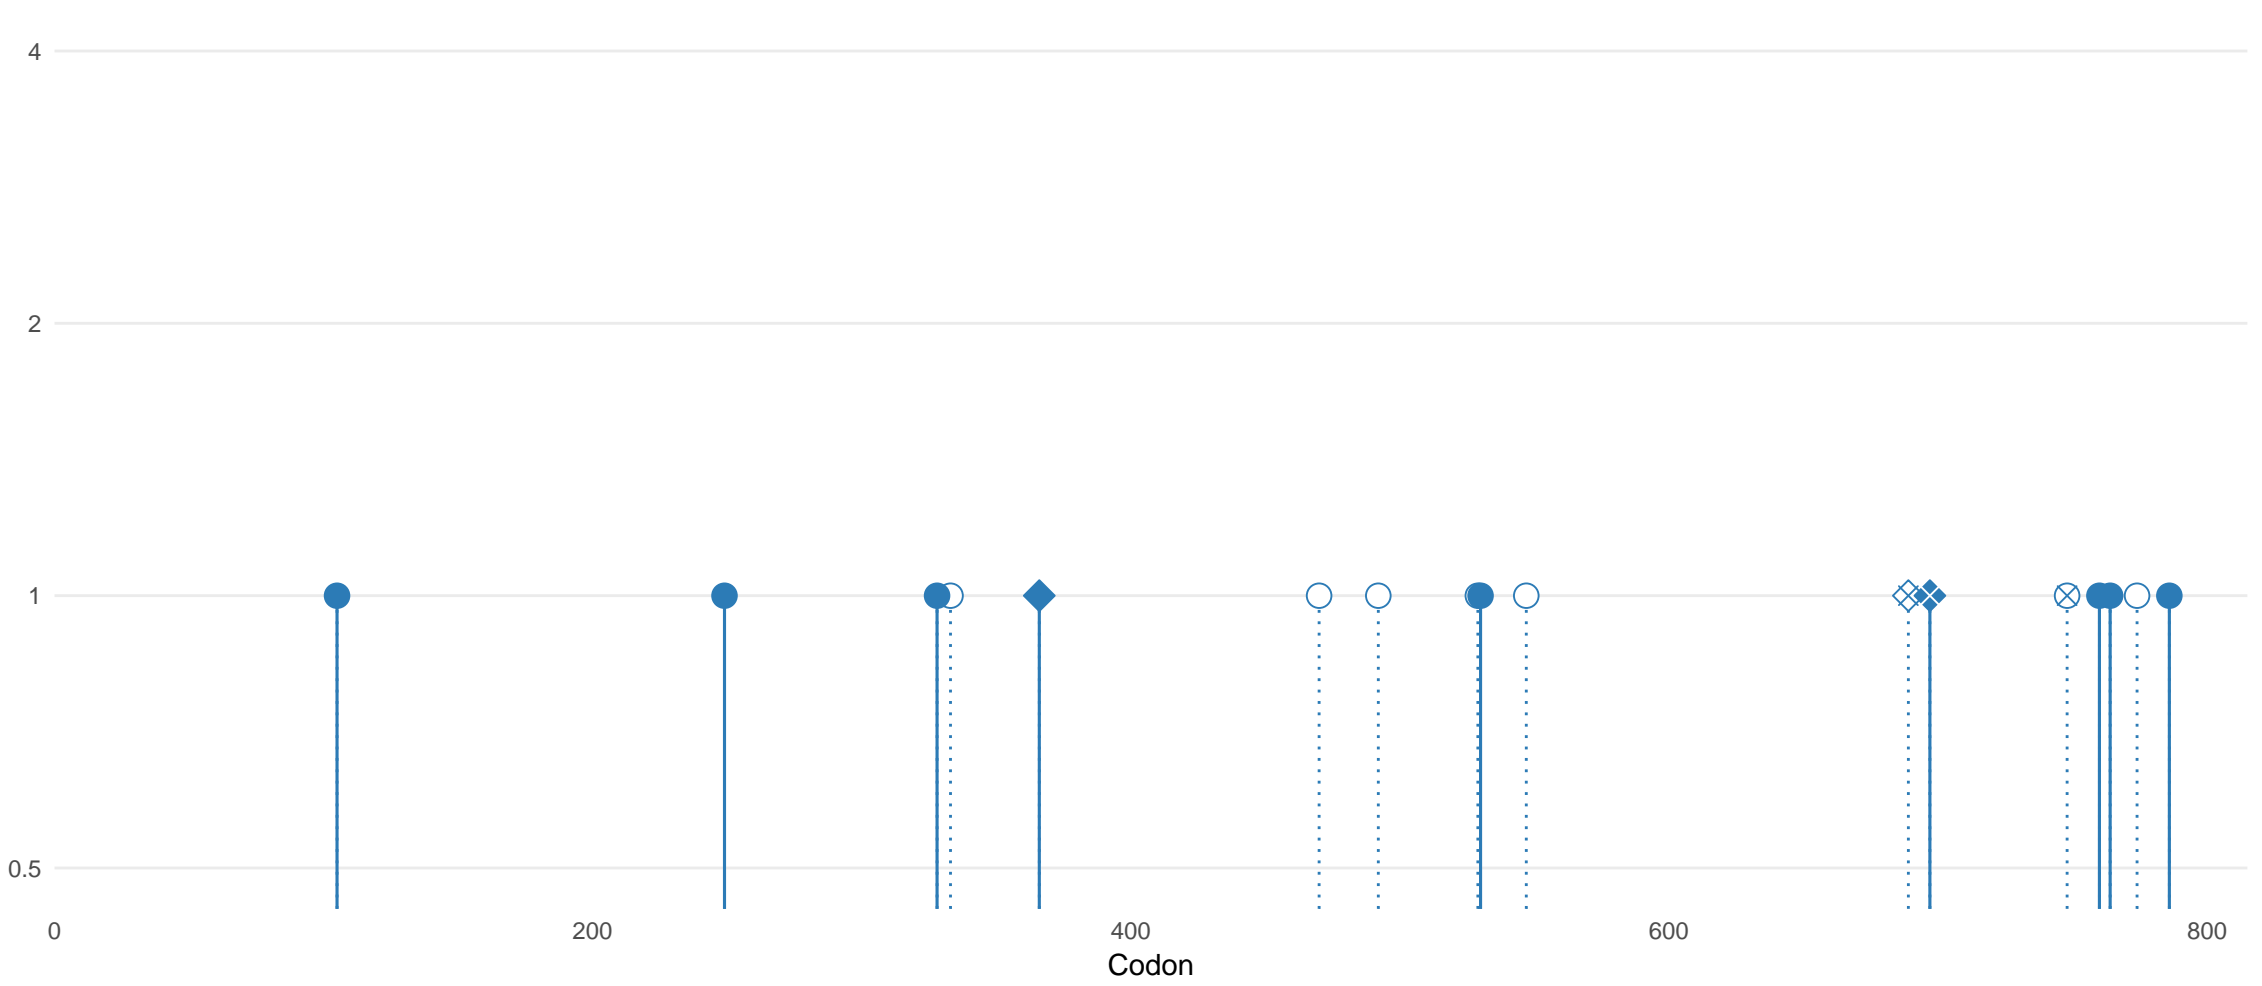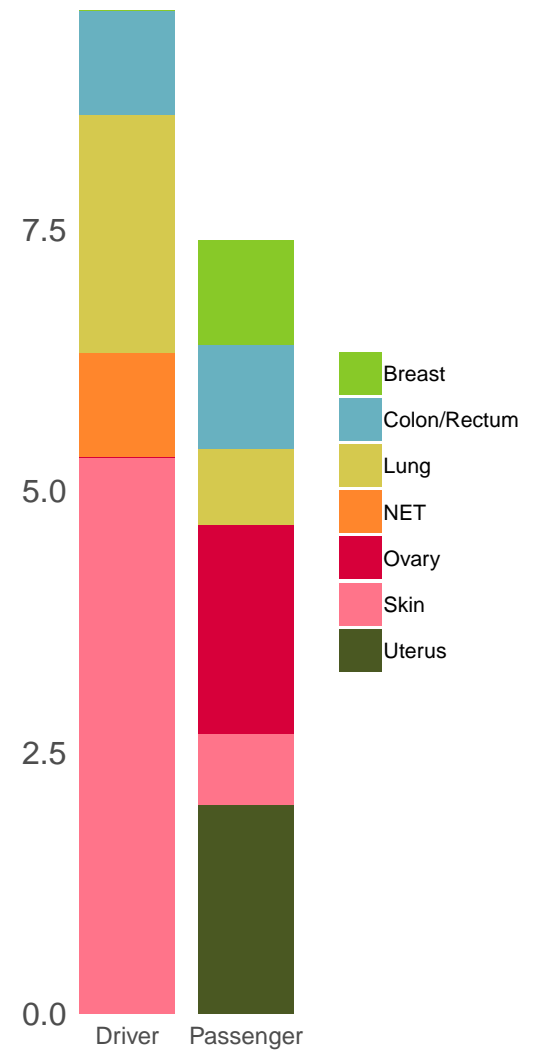

Monoallelic: ○ SNV □ MNV ◇ INDEL in frame ⊗ SNV nonsense ⊗ MNV nonsense ⊗ INDEL out of frame Biallelic/Multihit: ● SNV ■ MNV ◆ INDEL in frame ⊗ SNV nonsense ⊗ MNV nonsense ◆ INDEL out of frame Hotspot: ●

# ZNRF3 Variants

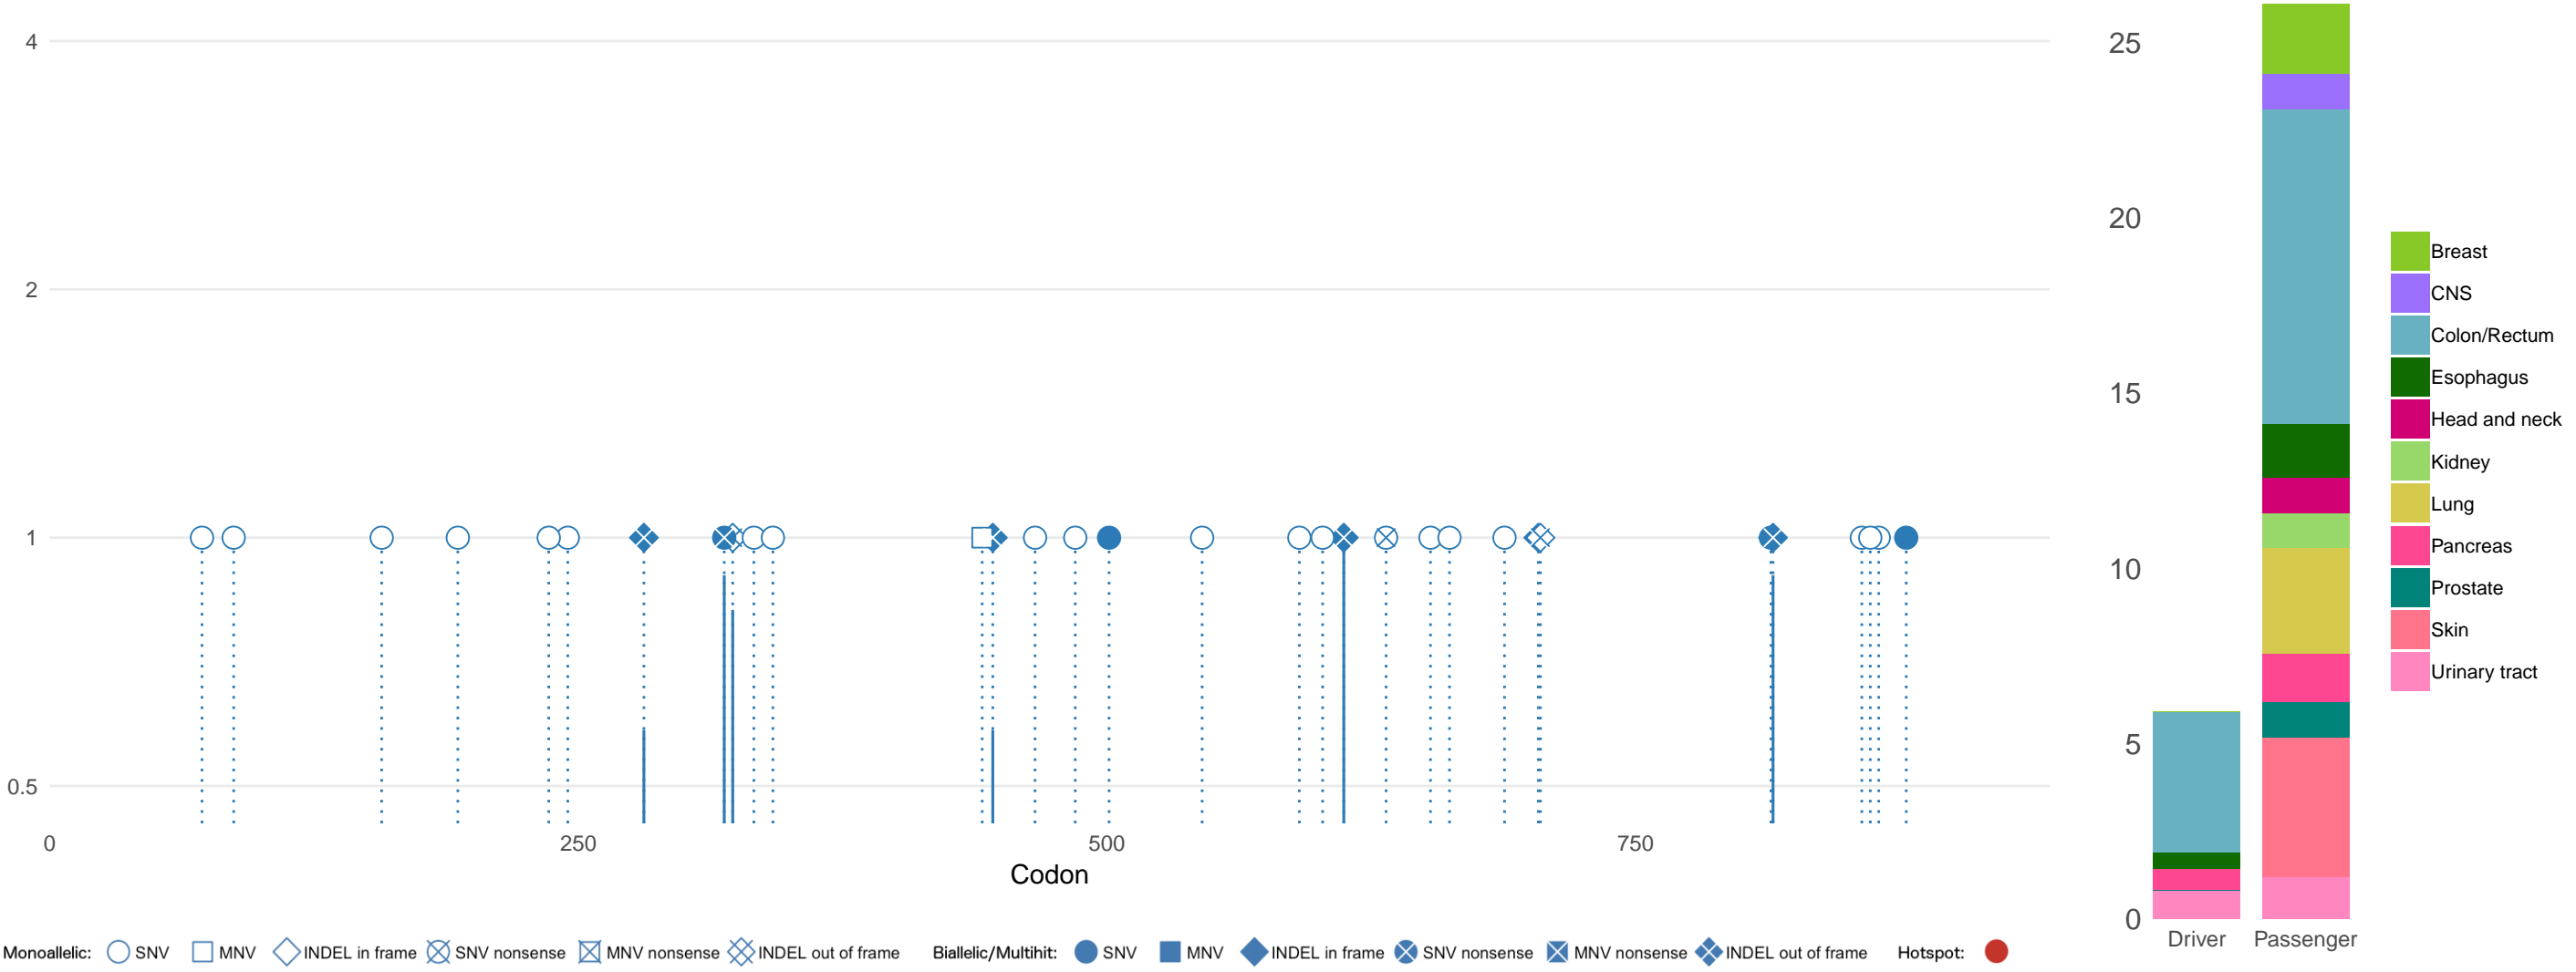

# ZRSR2 Variants

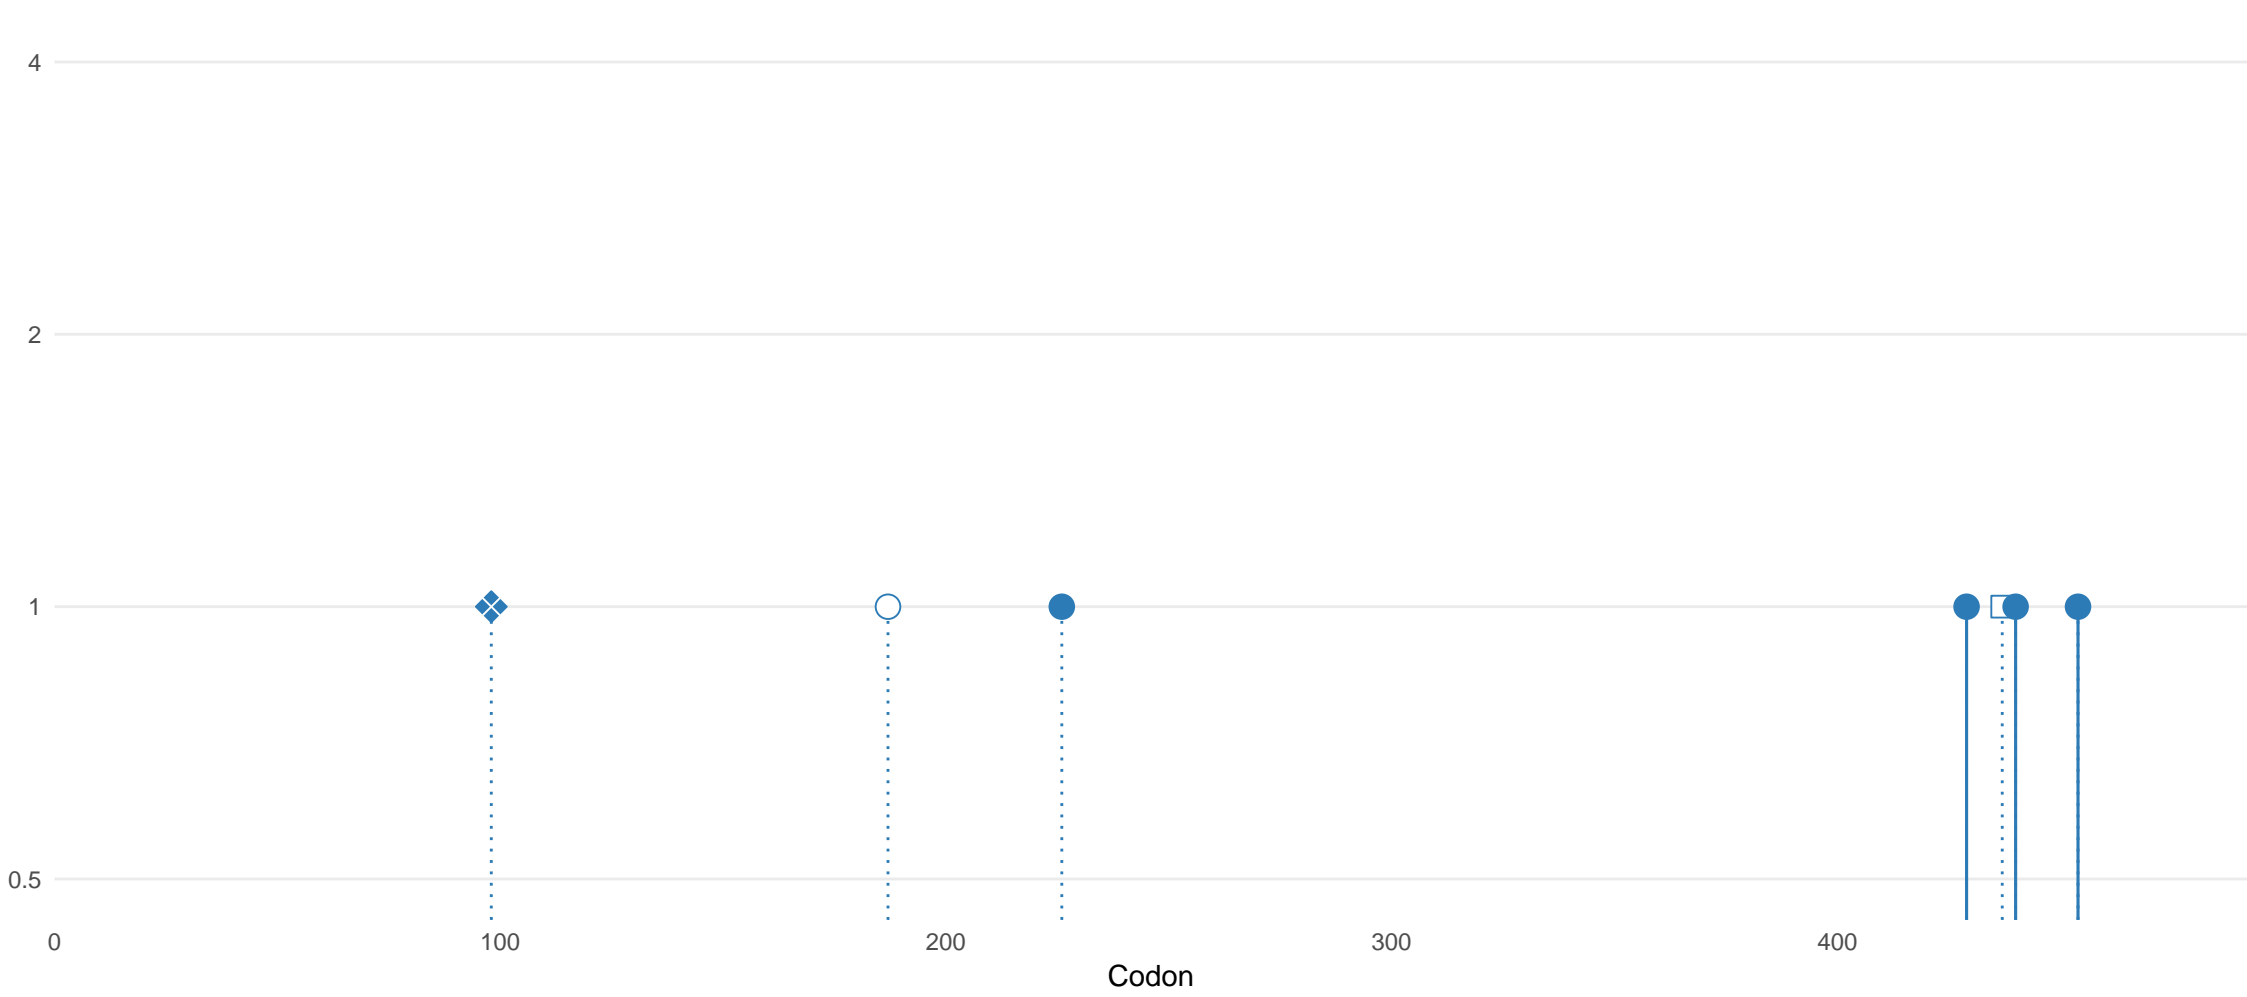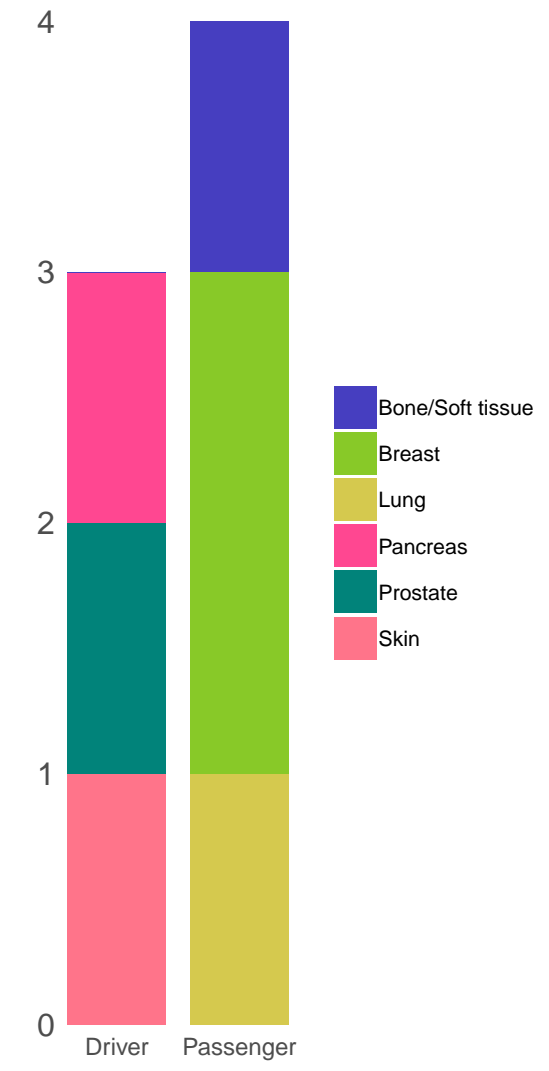

Supplement: Supplementary file [file media-8.pdf]
