# Supplementary material for: Pan-cancer whole genome analyses of metastatic solid tumors
Source: bioRxiv or medRxiv preprint supplement (doi:10.1101/415133), 2019-08-12

## Biliary

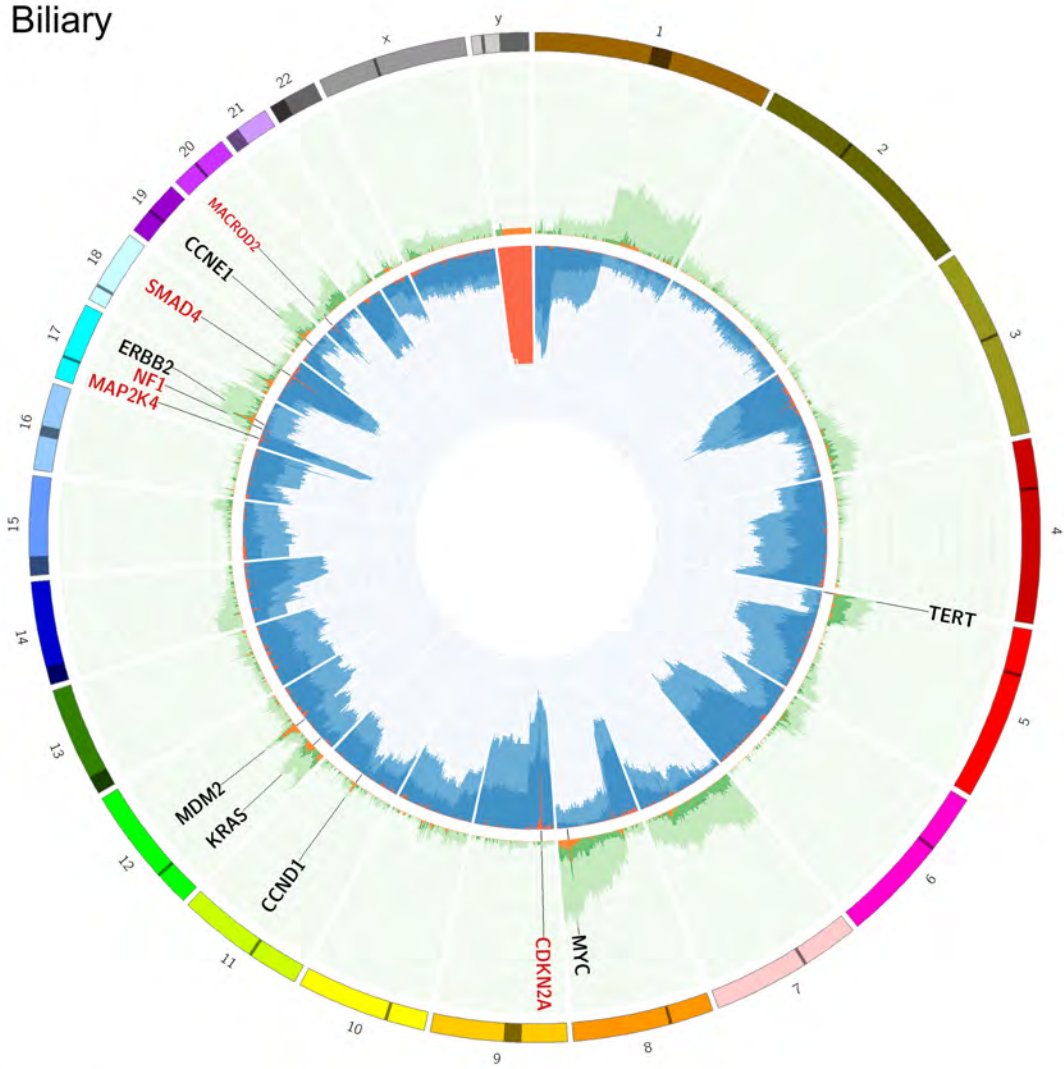

## Bone/Soft tissue

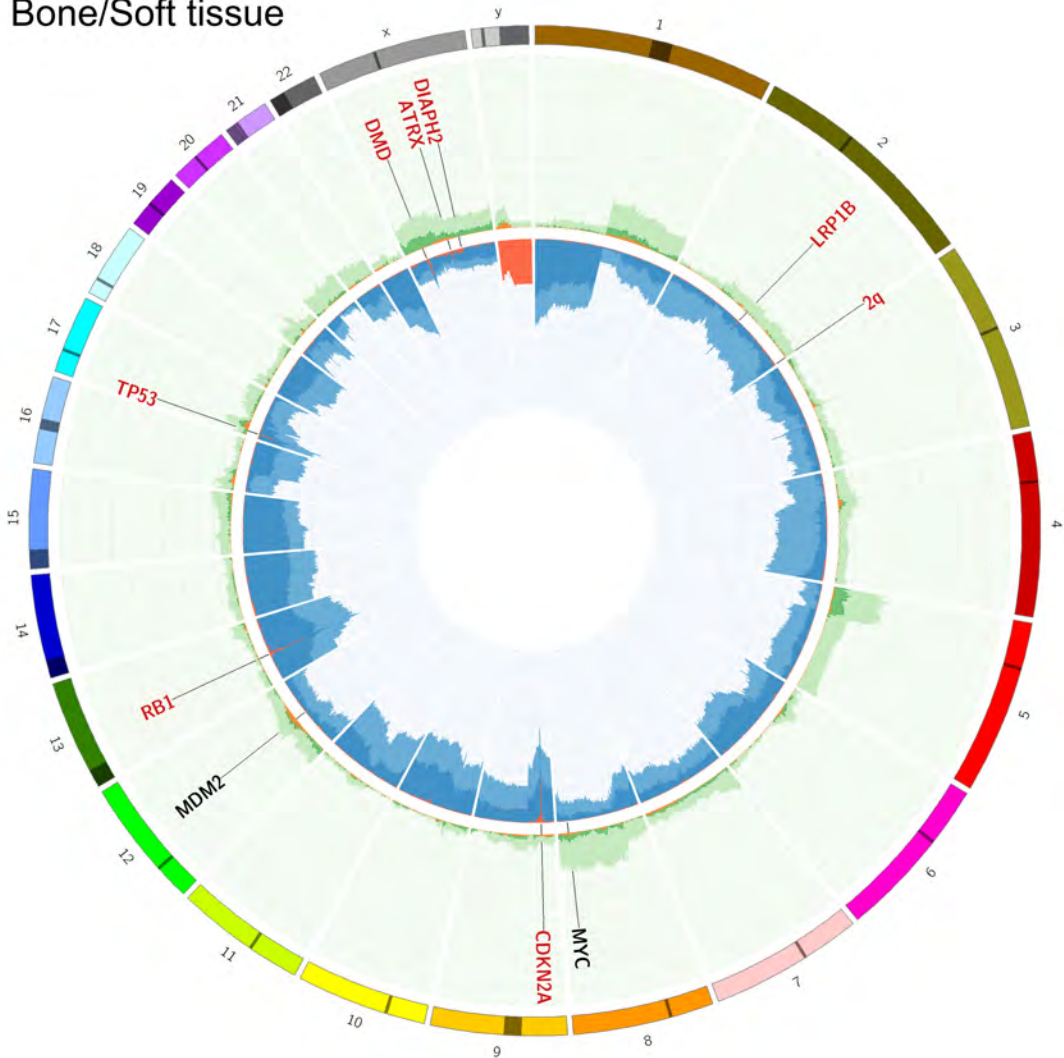

# Breast

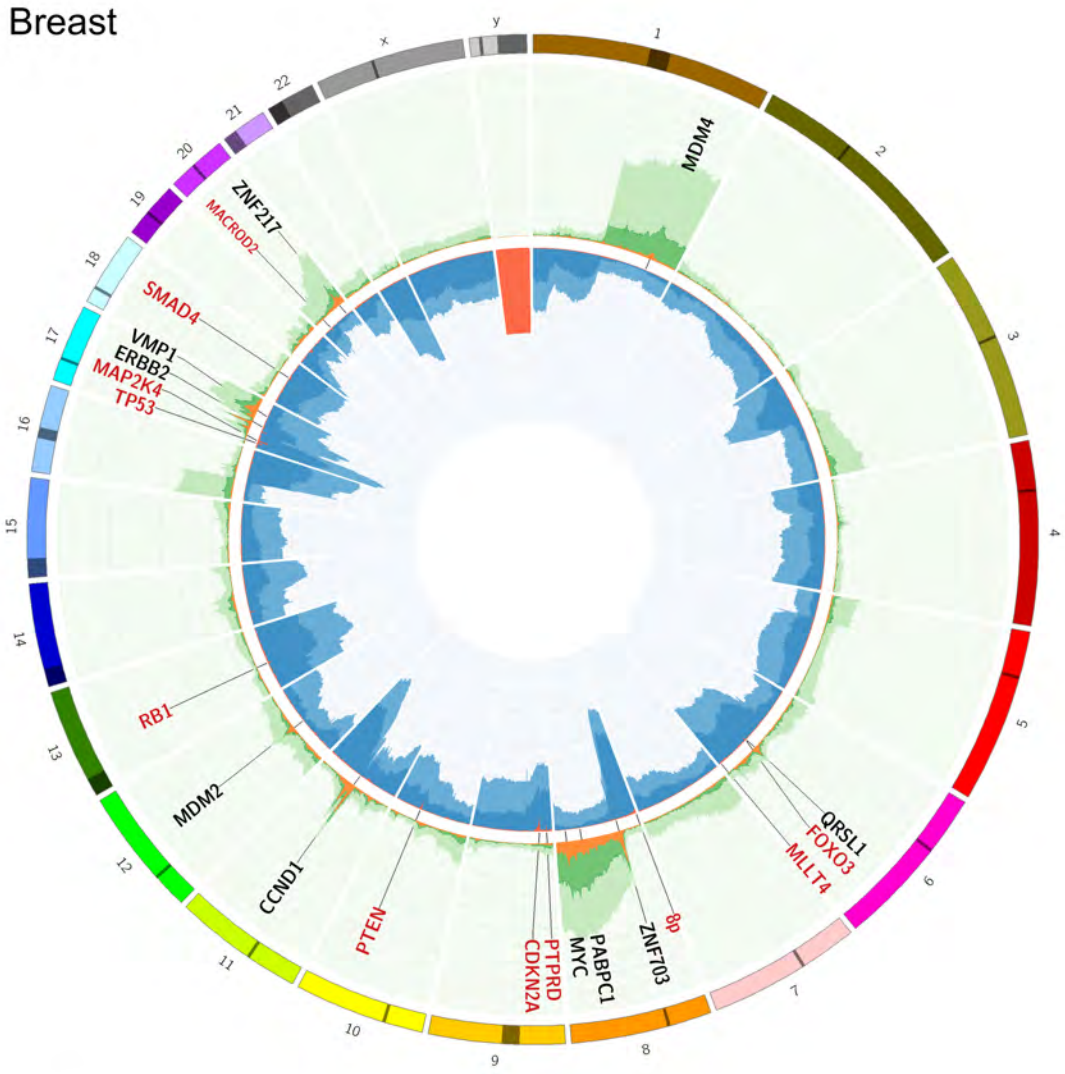

# CNS

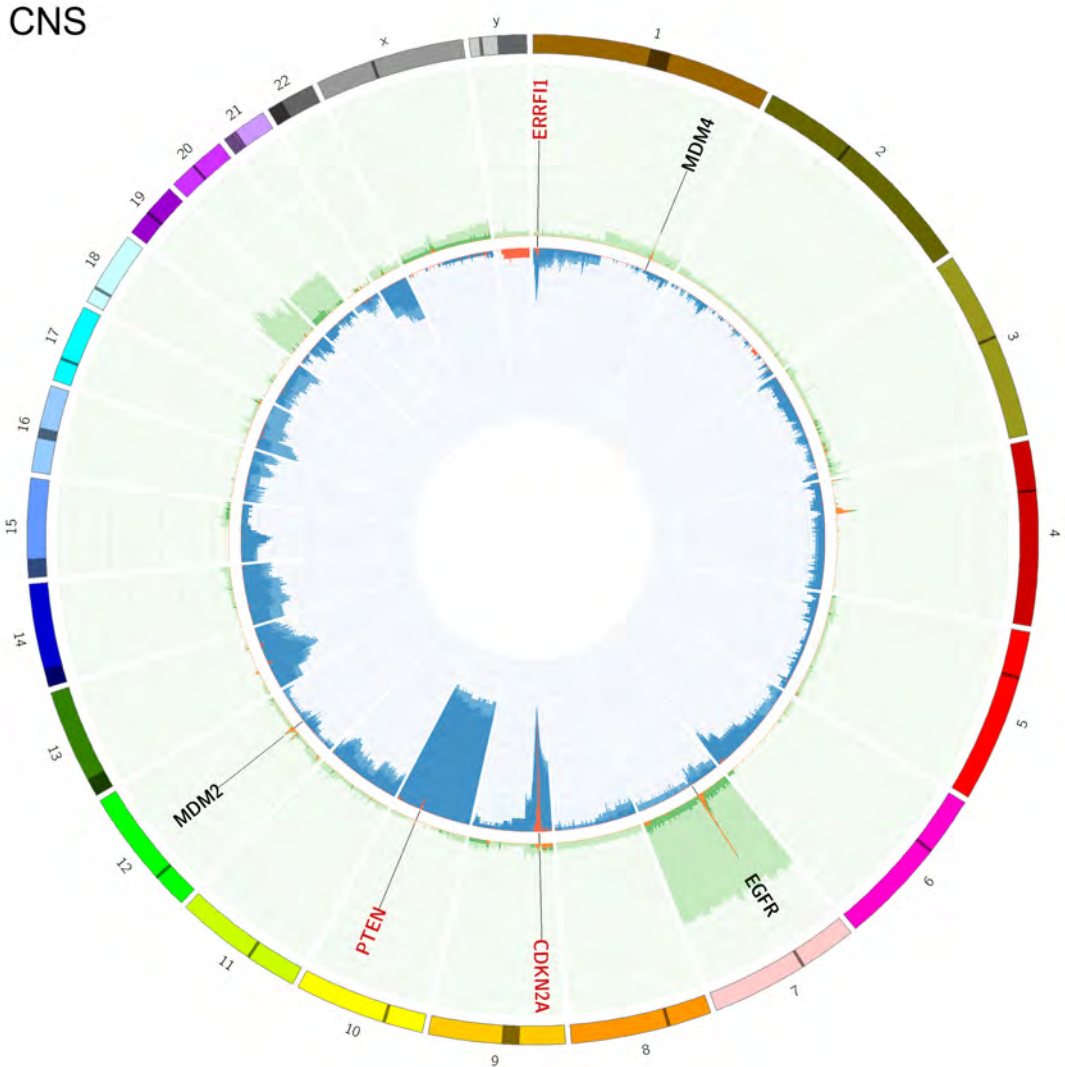

# Colon/Rectum

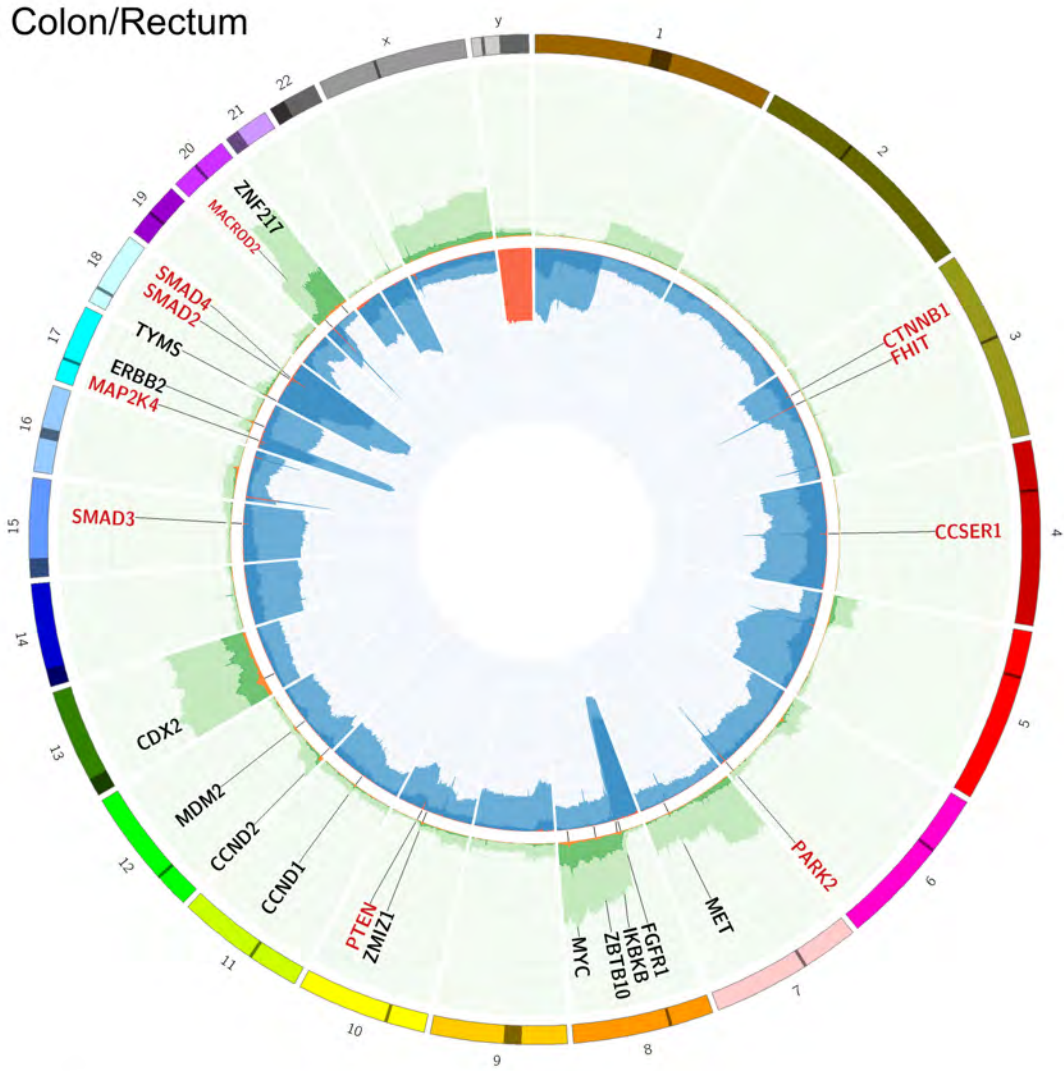

# CUP

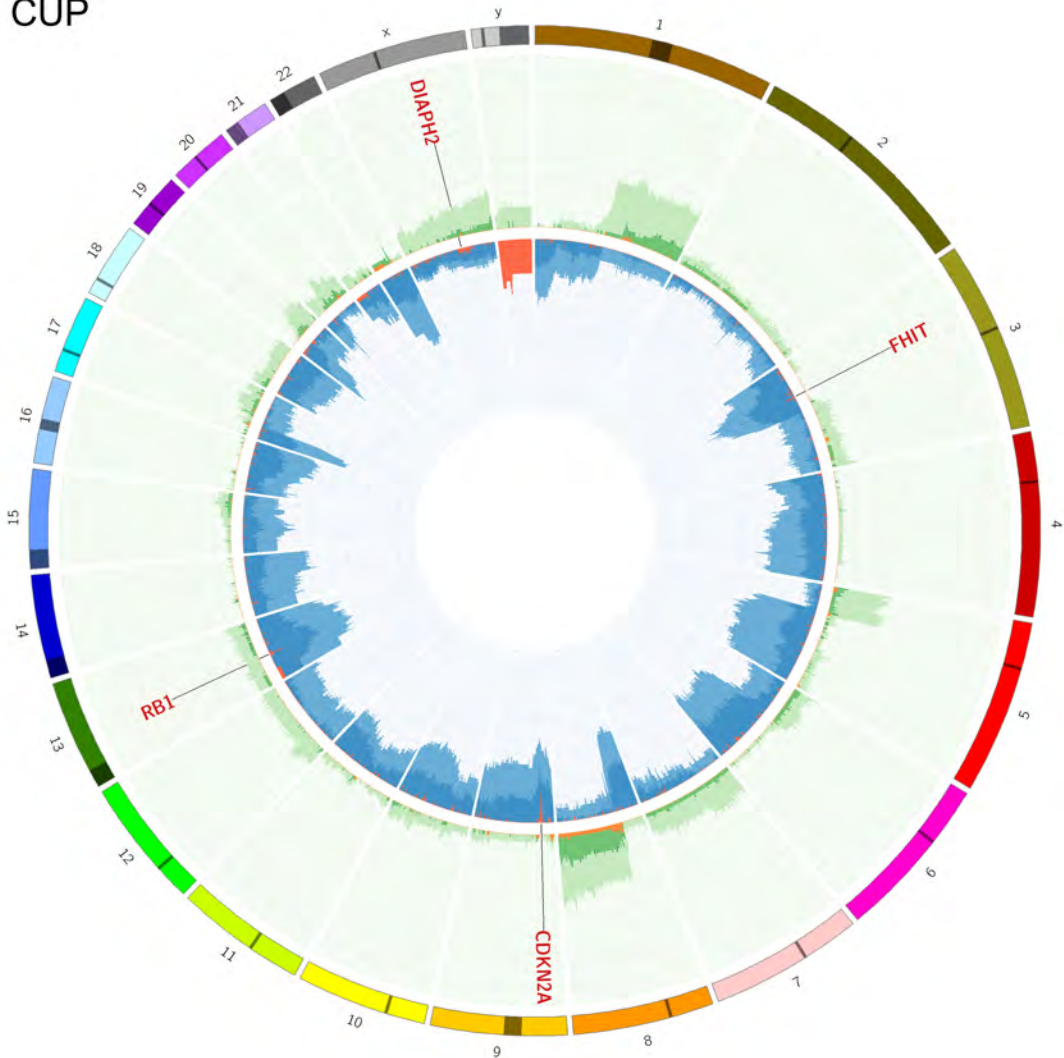

# Esophagus

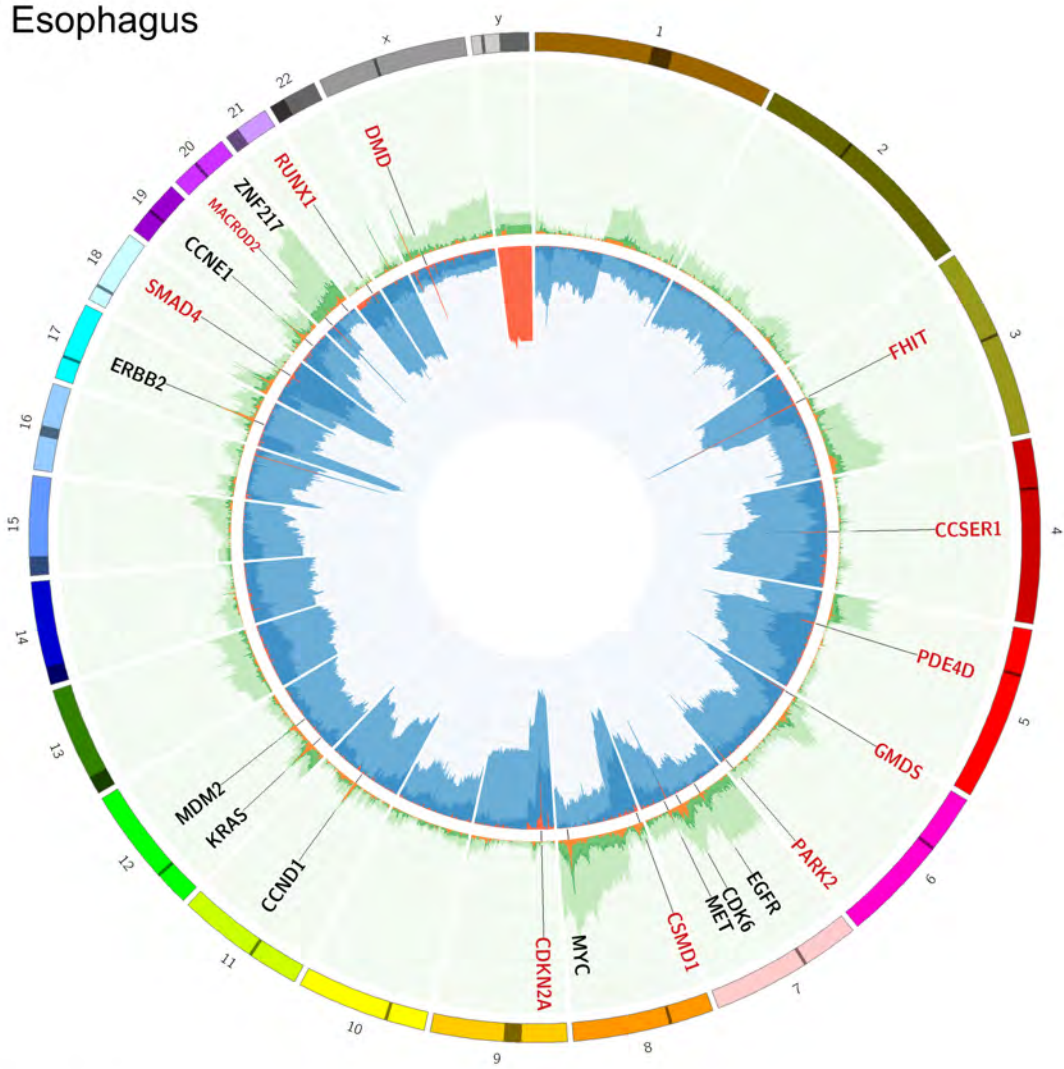

# Head and neck

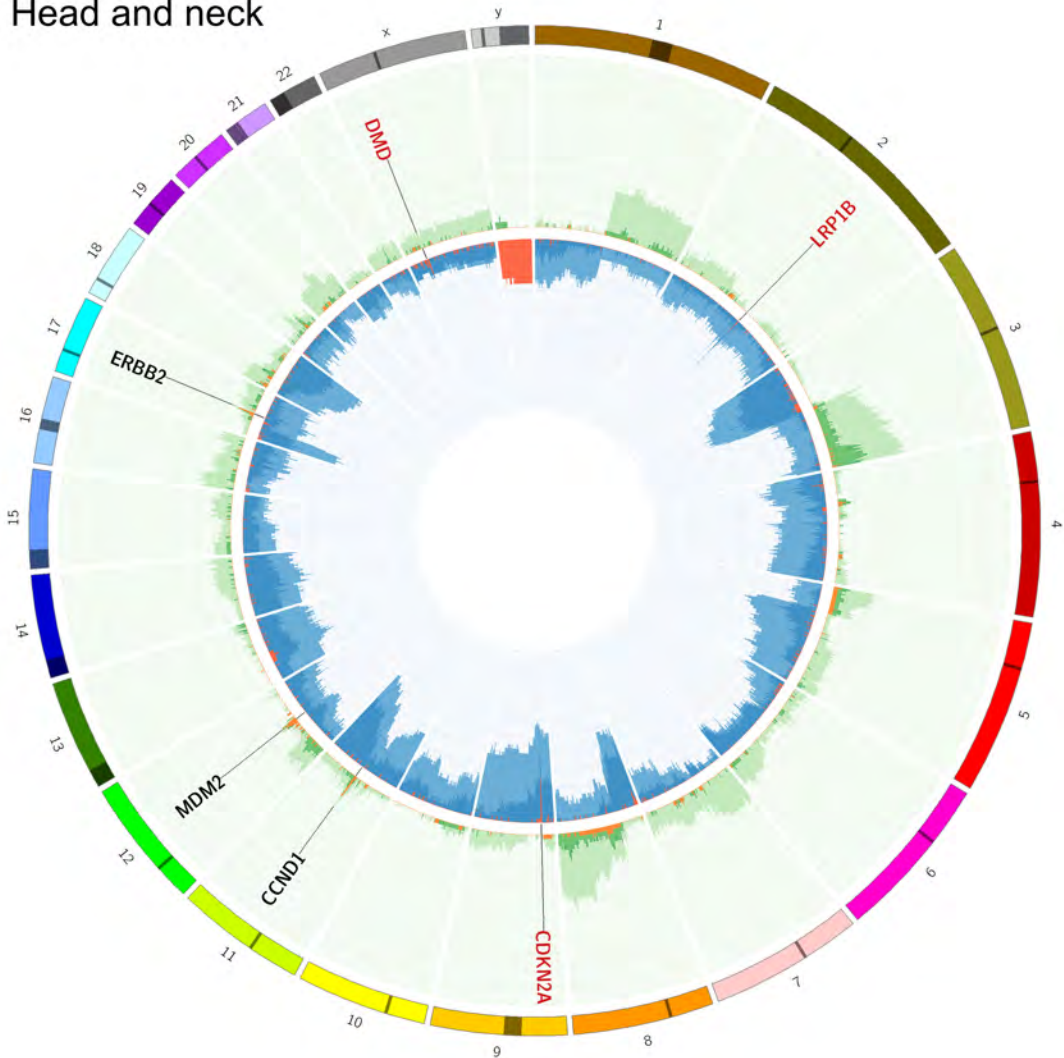

# Kidney

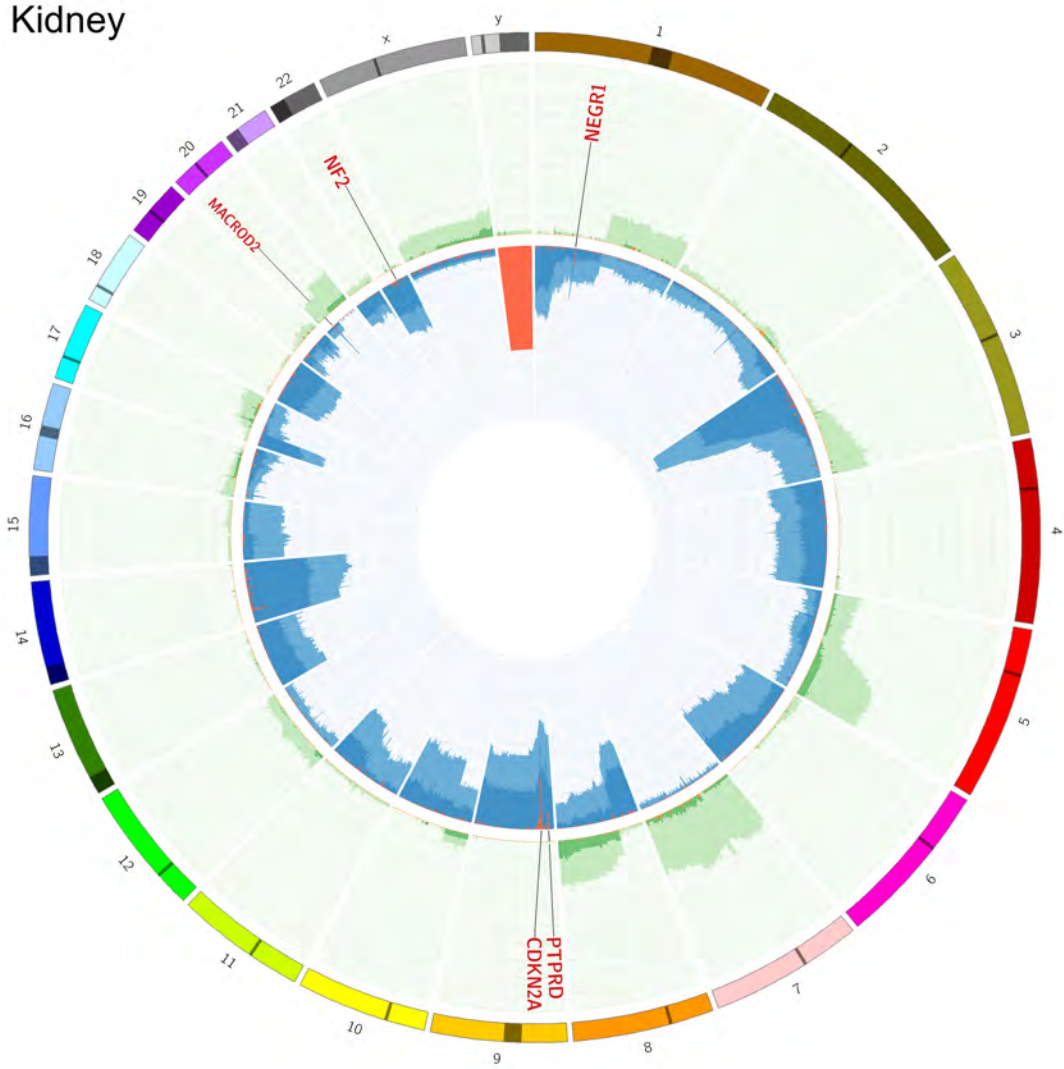

# Liver

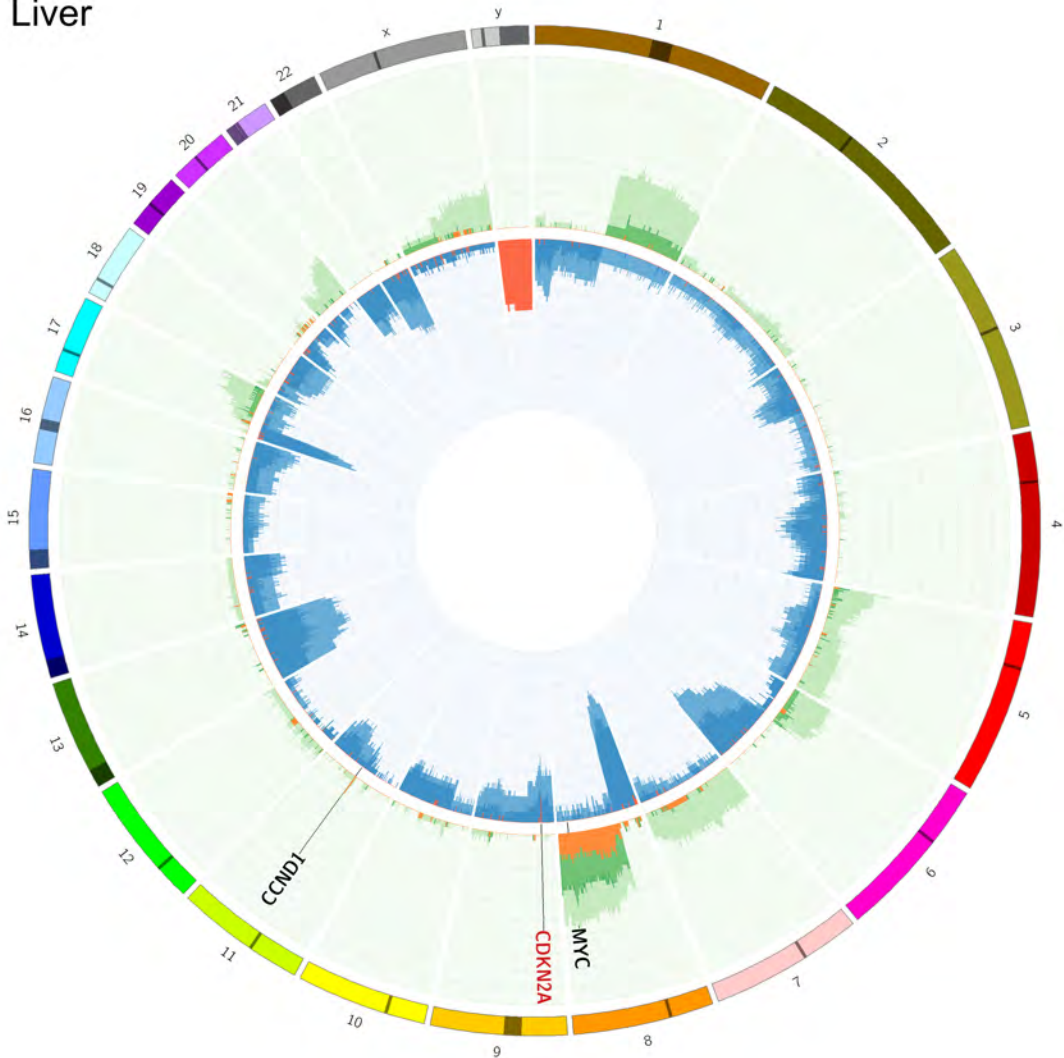

# Lung

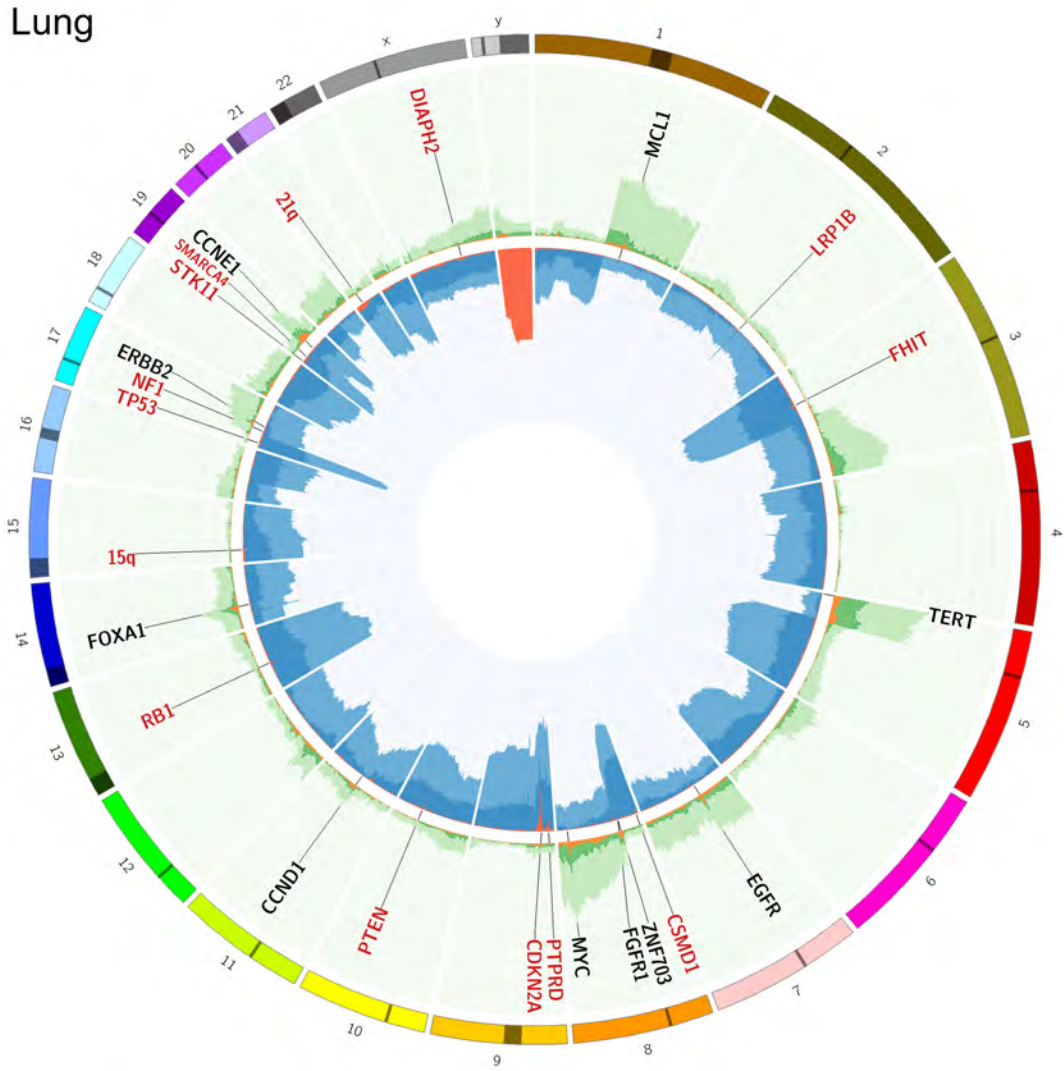

# Mesothelioma

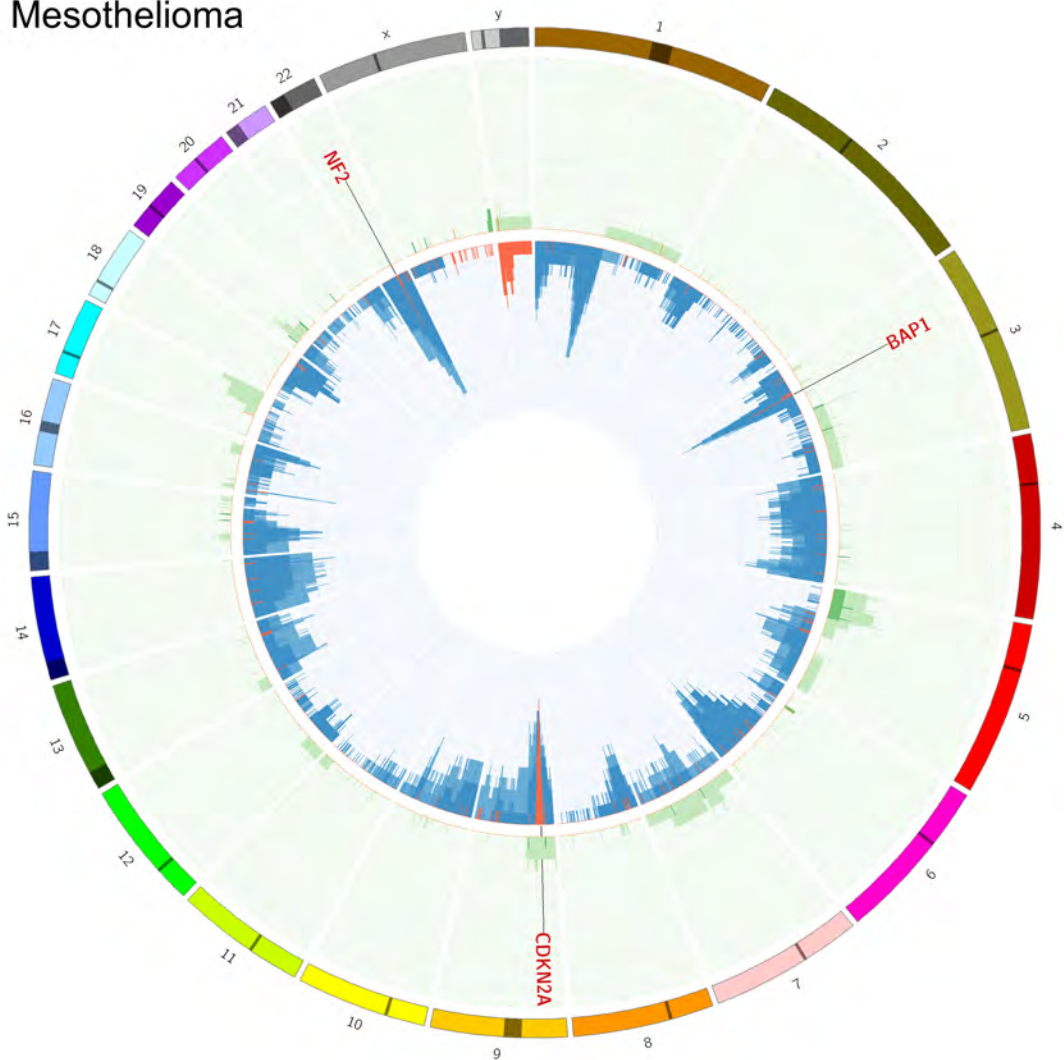

# NET

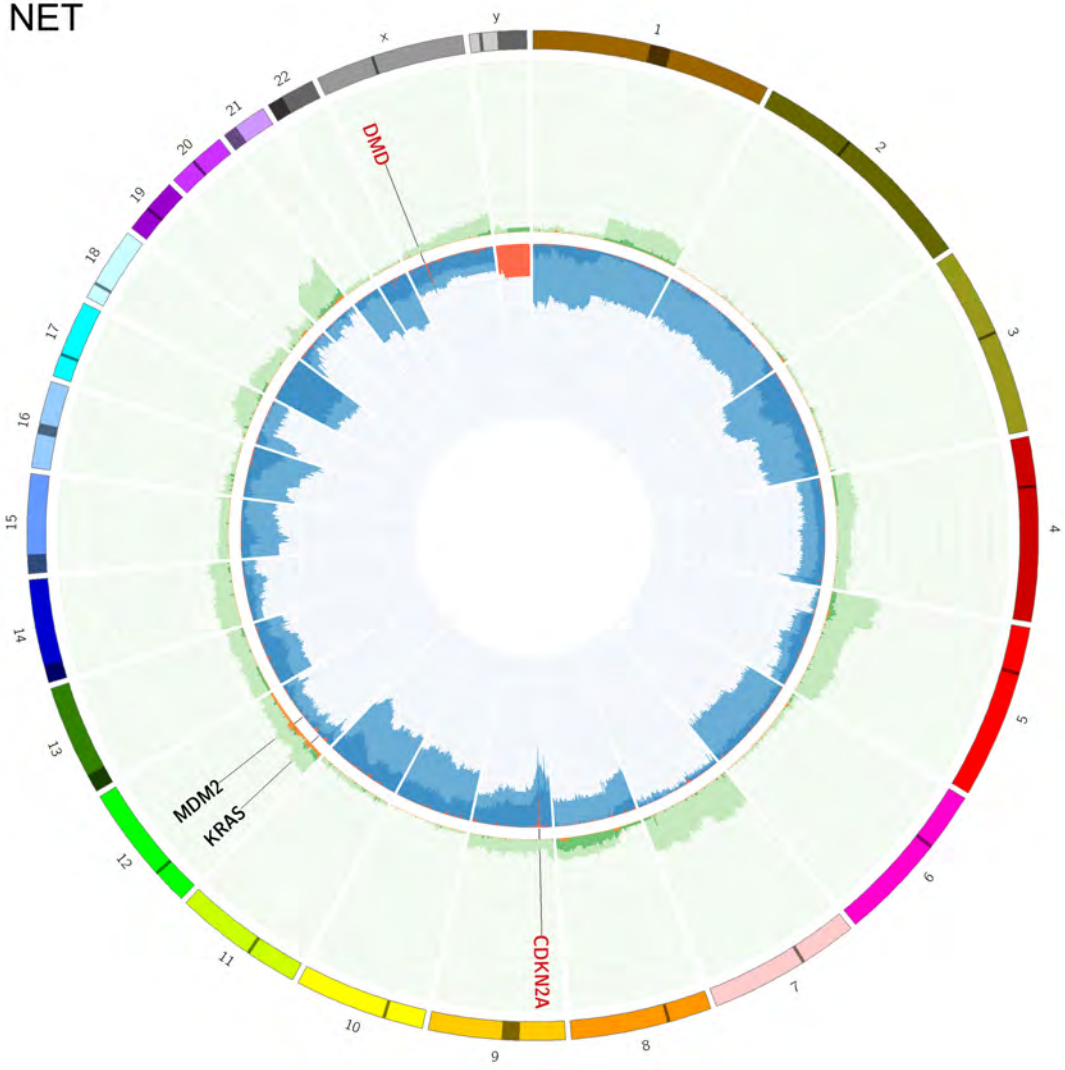

# Ovary

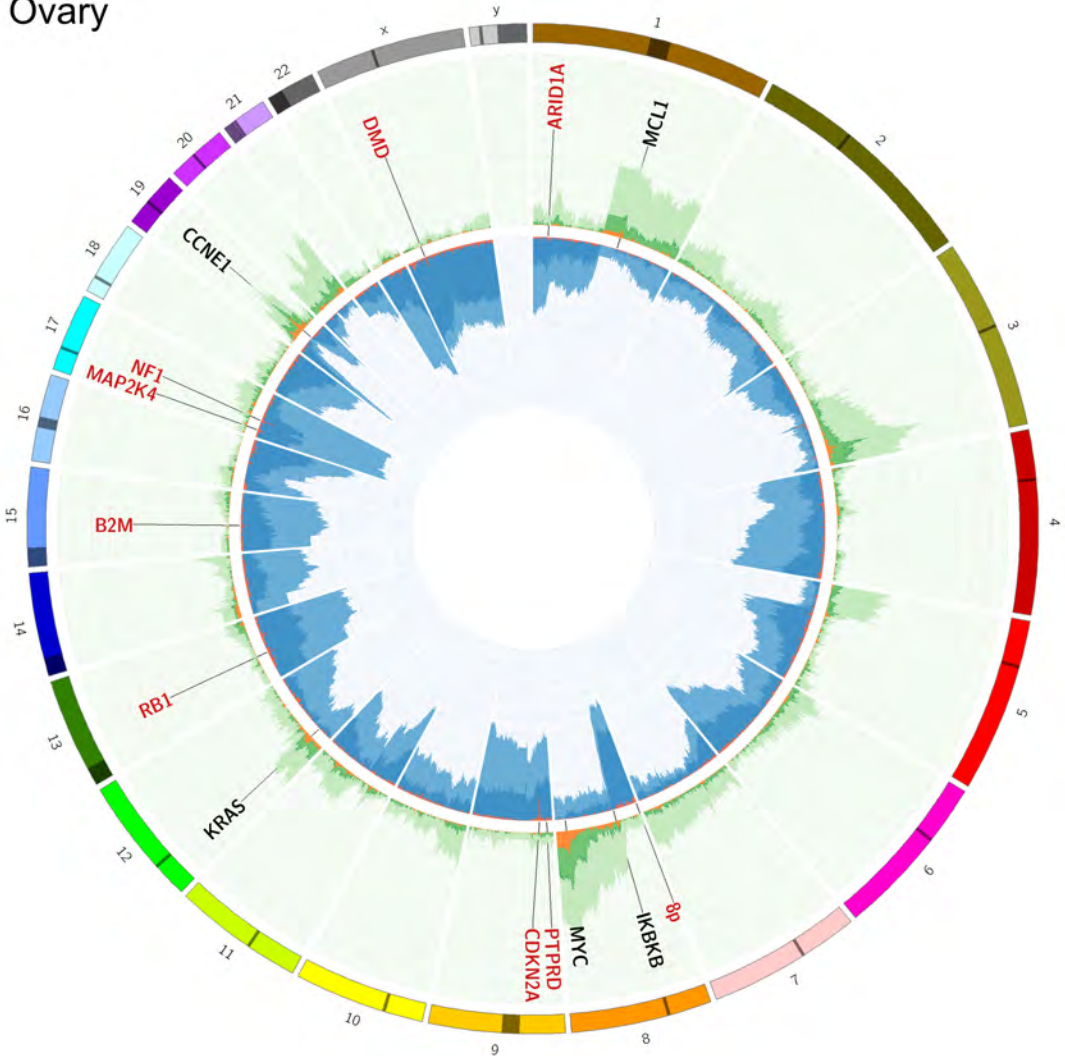

# Pancreas

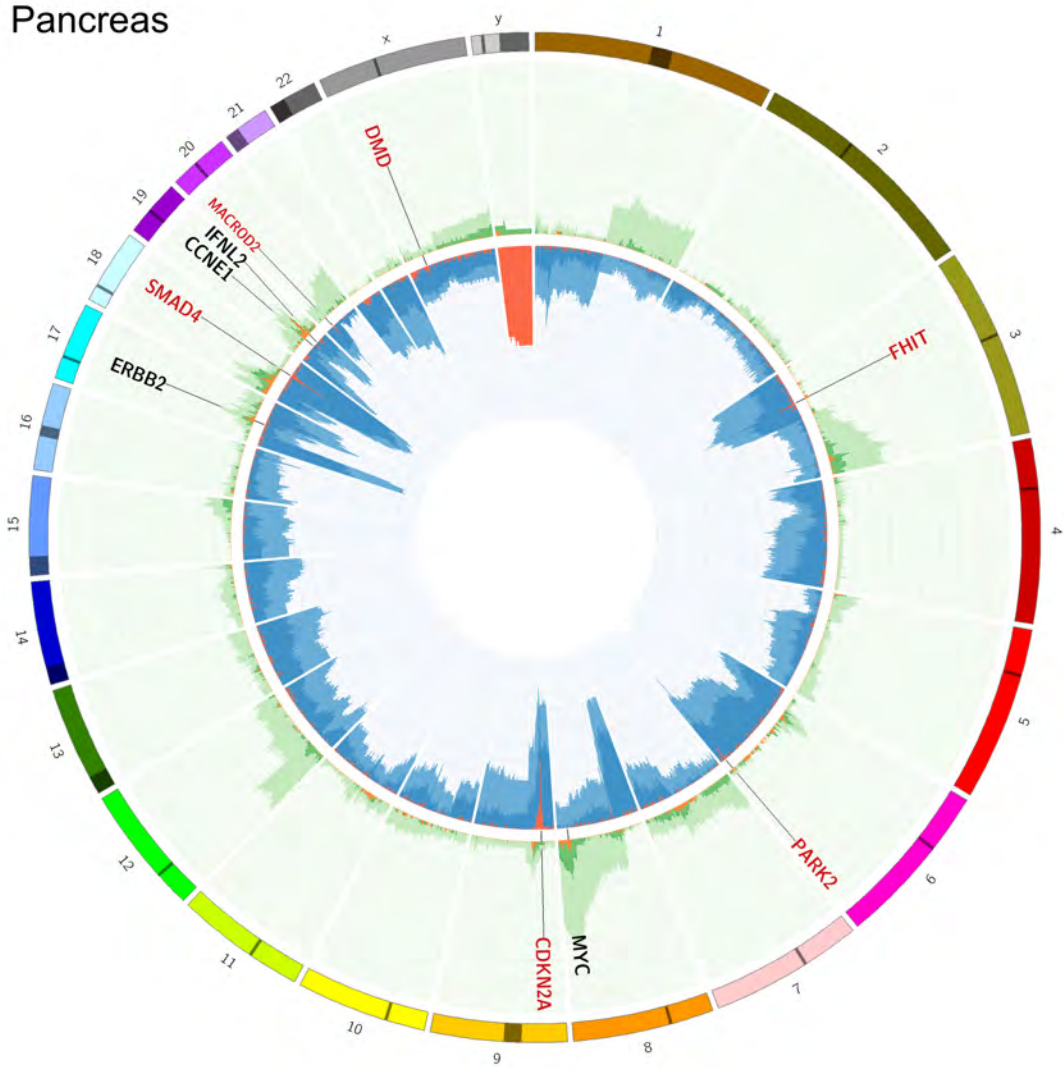

# Prostate

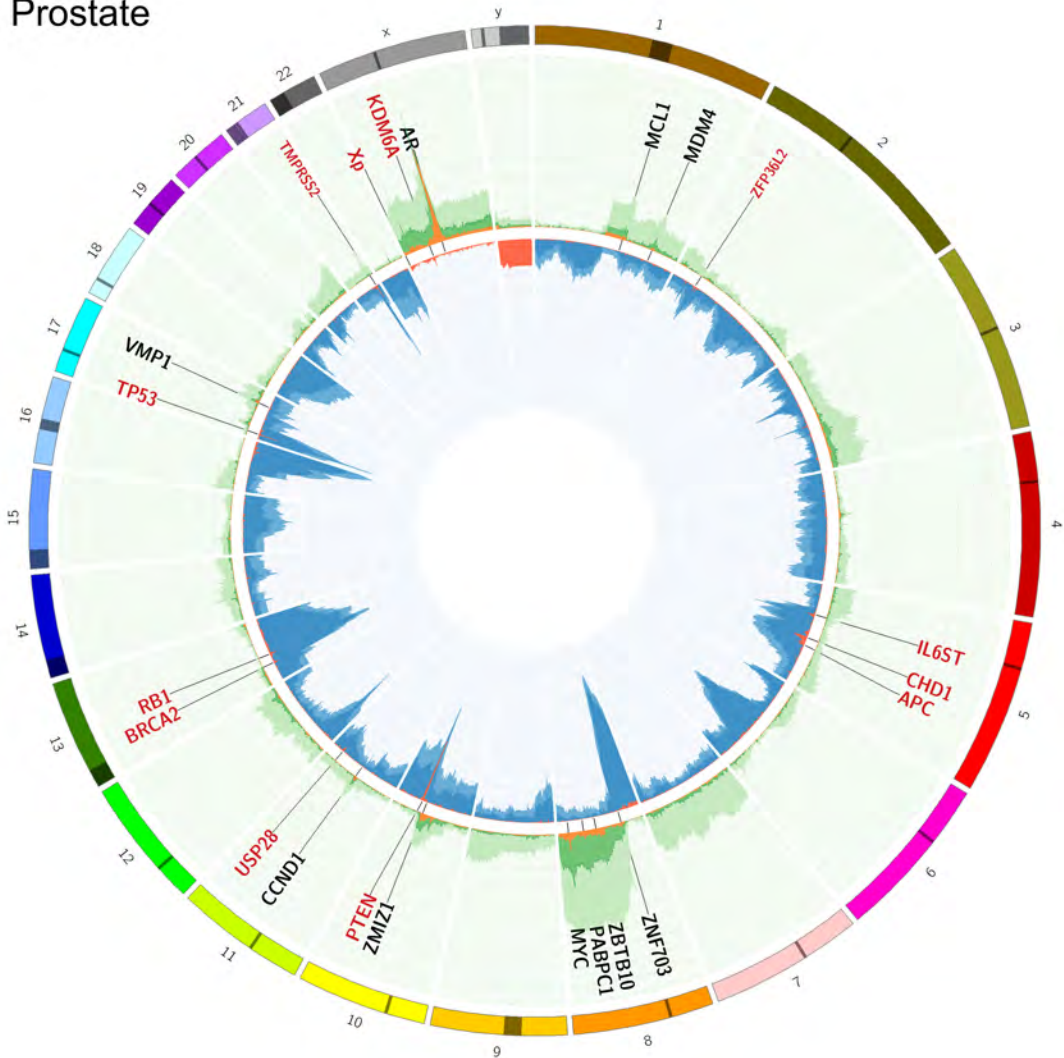



# Skin

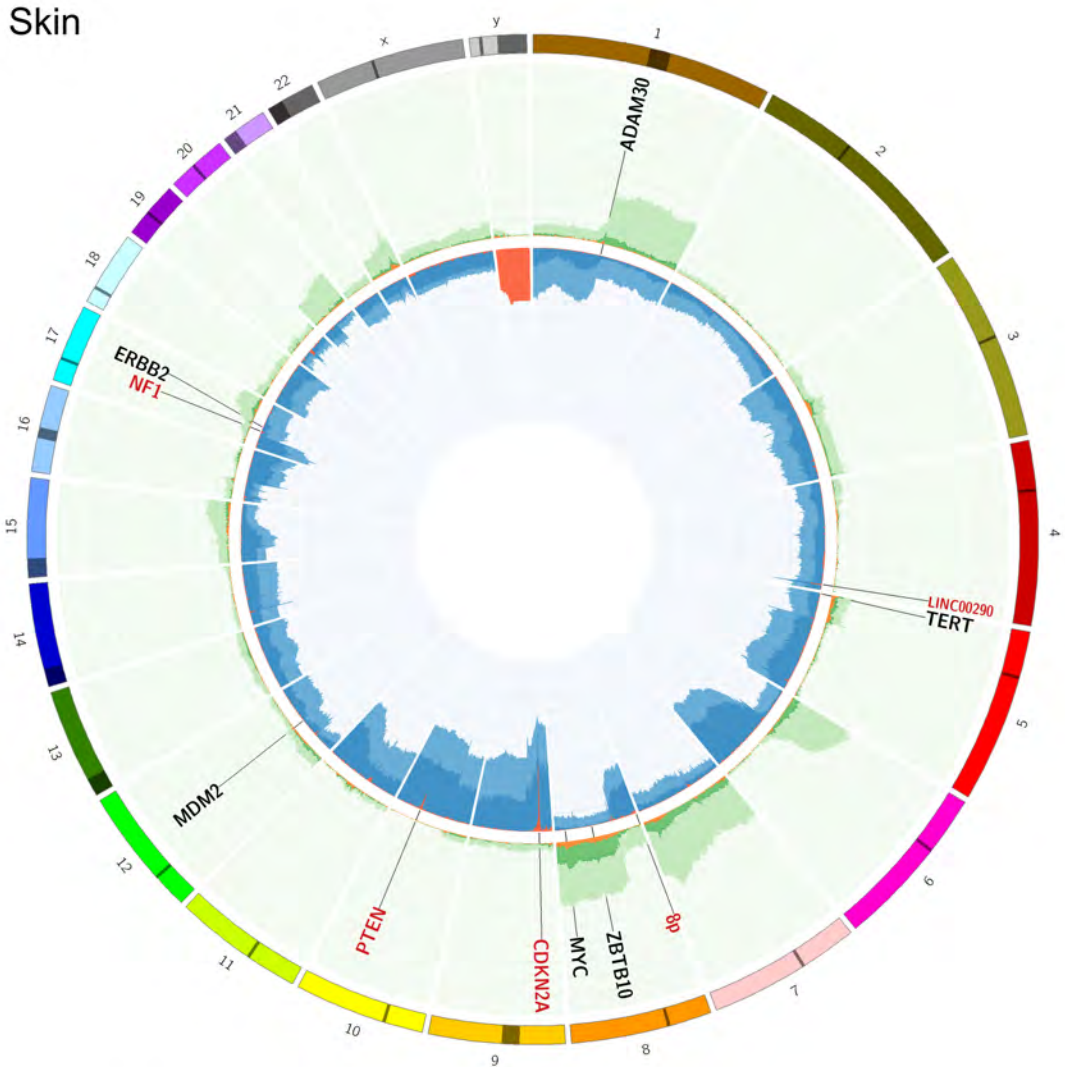

# Stomach

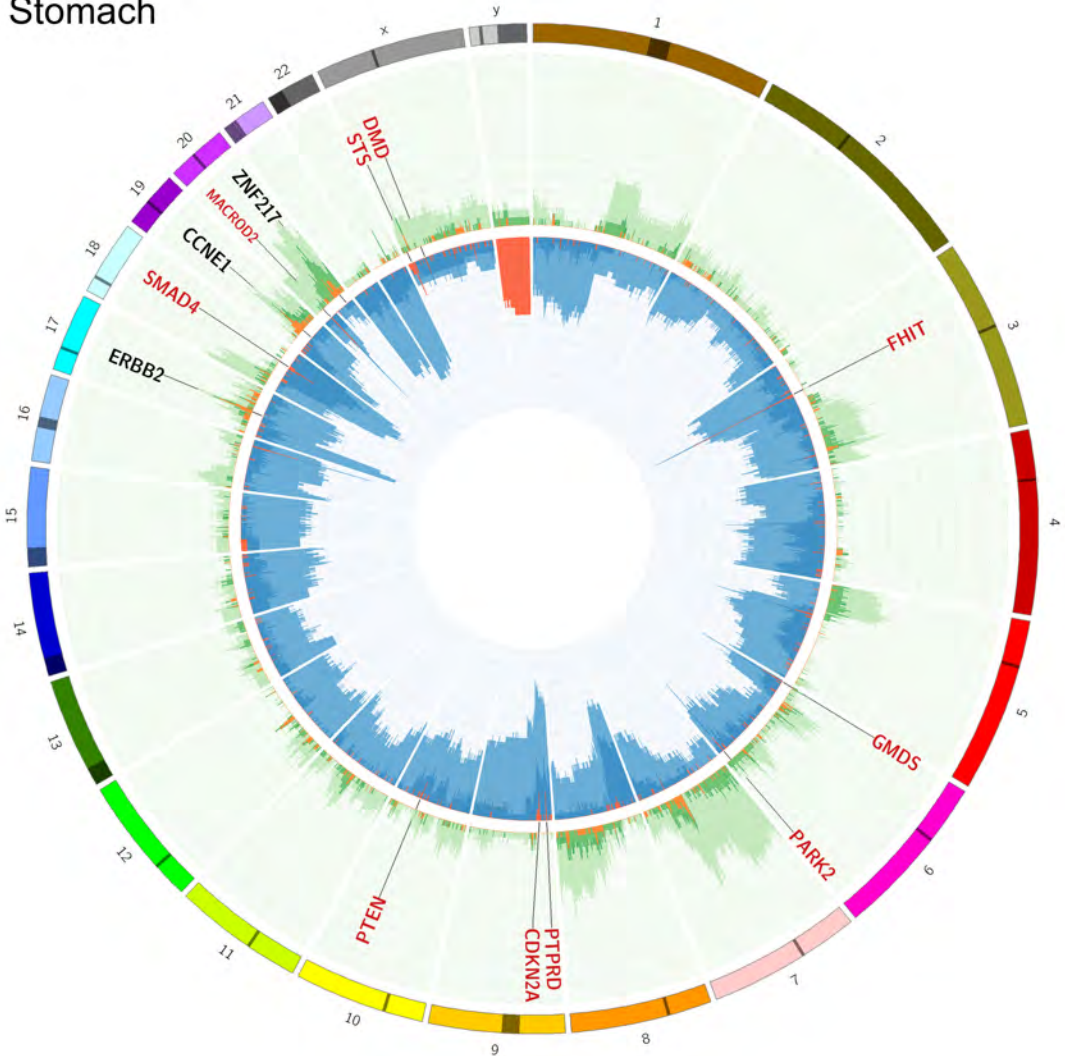

# Urinary tract

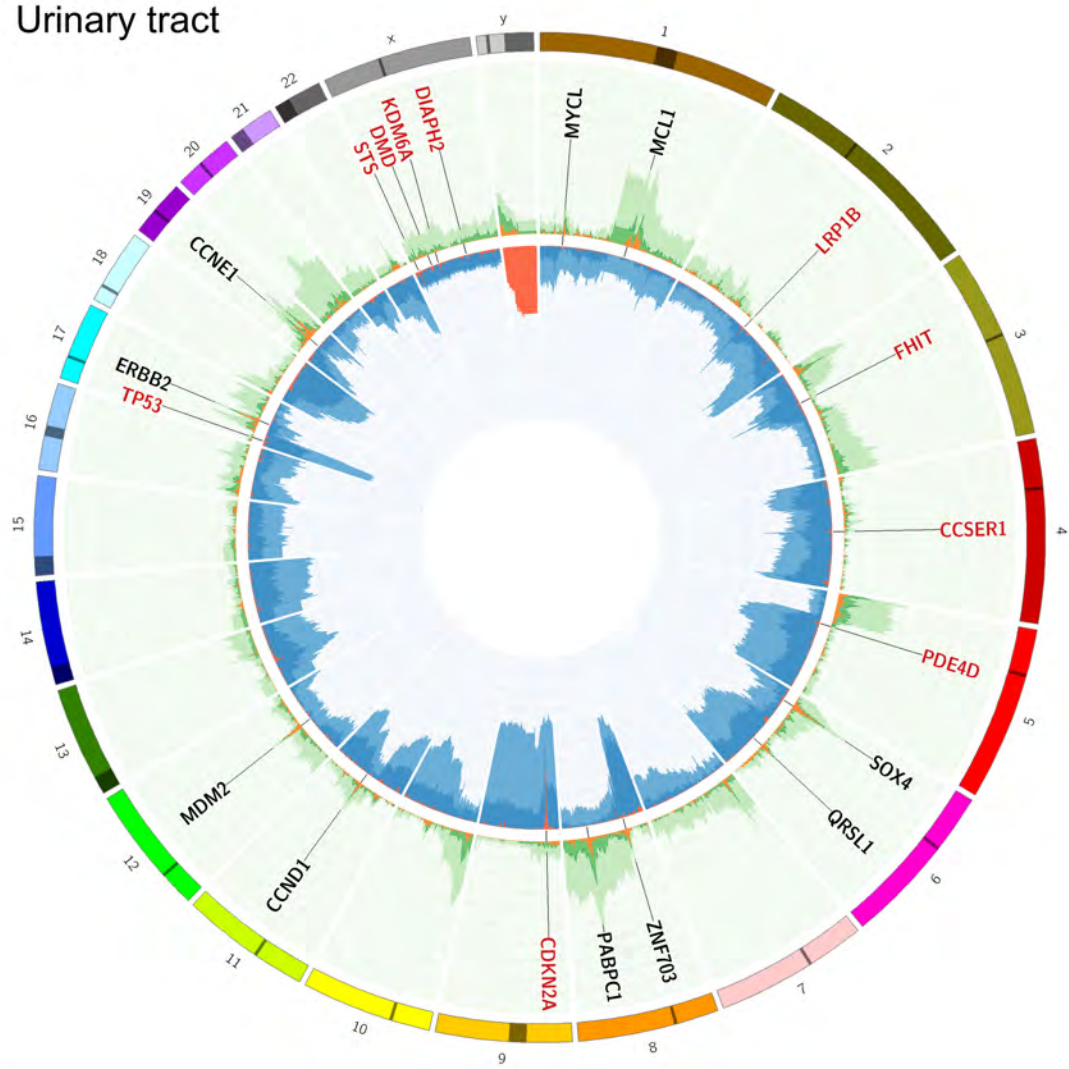

# Uterus

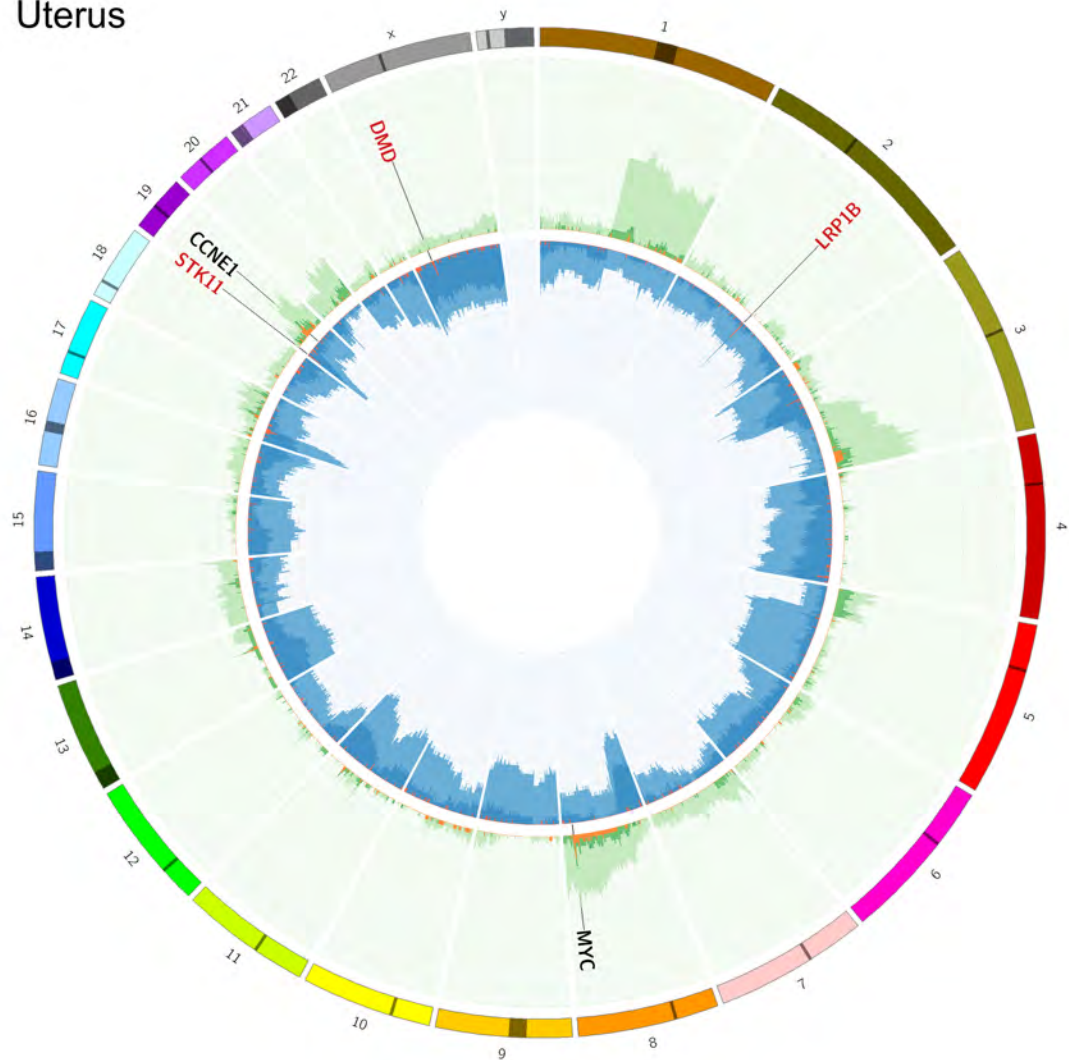

Supplement: Supplementary file [file 415133-4.pdf]
