# Supplementary material for: Pan-cancer whole genome analyses of metastatic solid tumors
Source: bioRxiv or medRxiv preprint supplement (doi:10.1101/415133), 2019-08-12

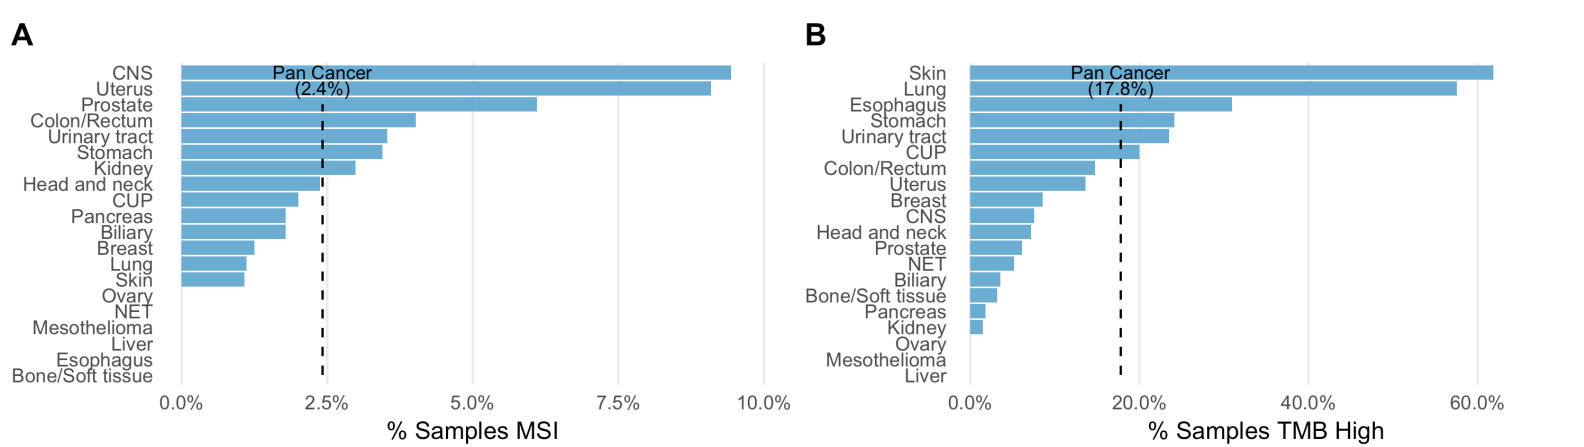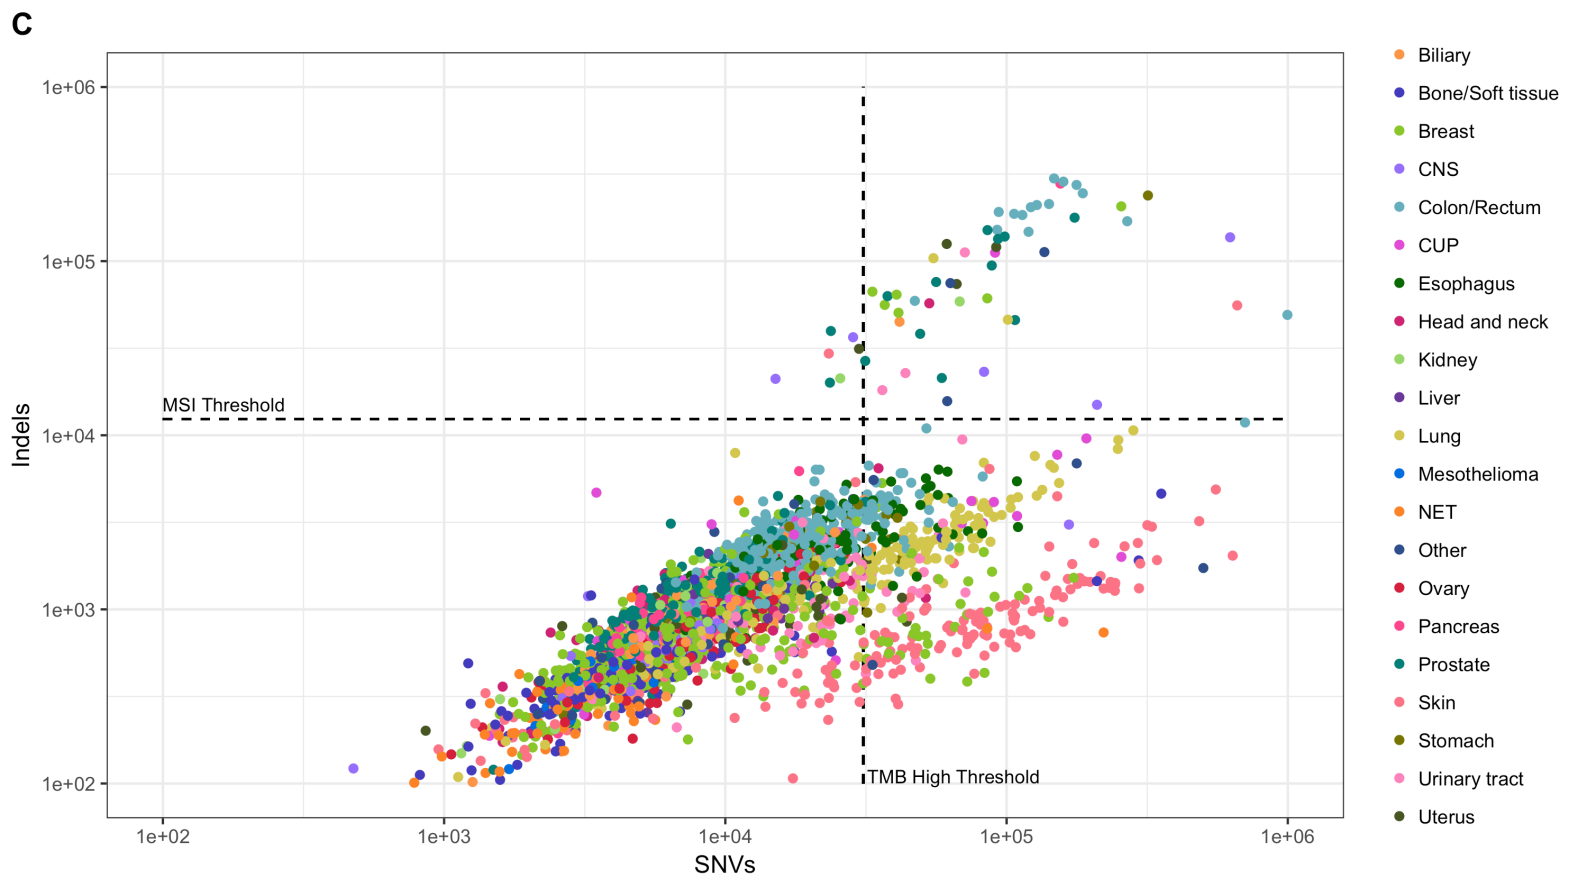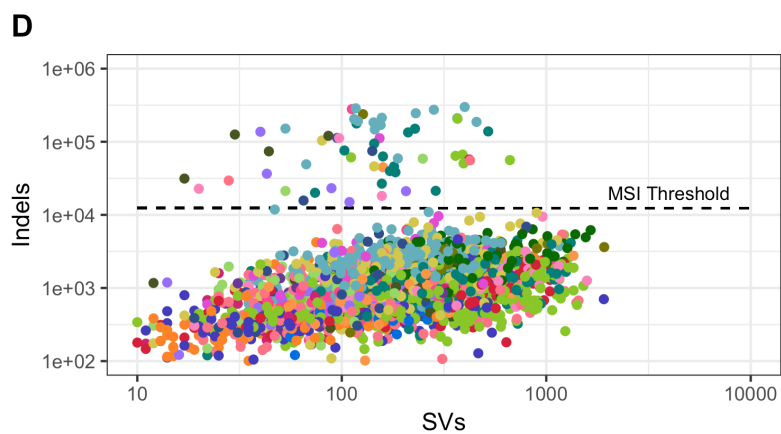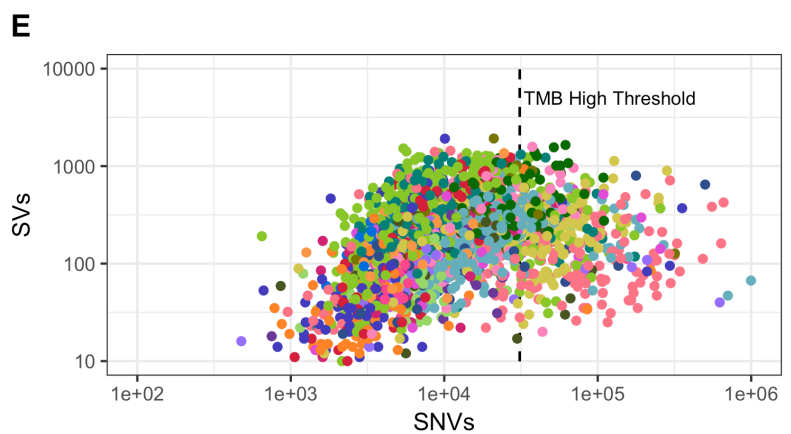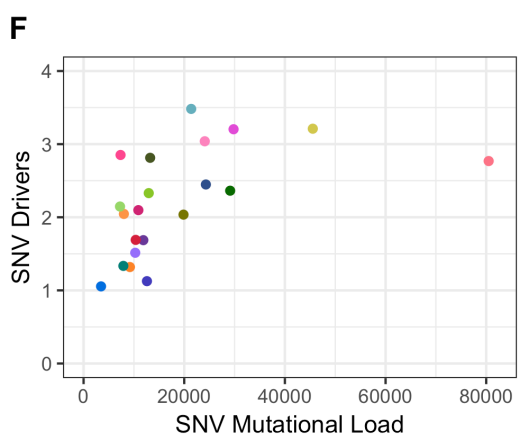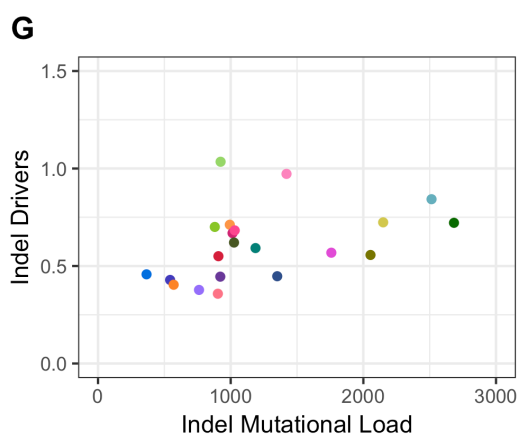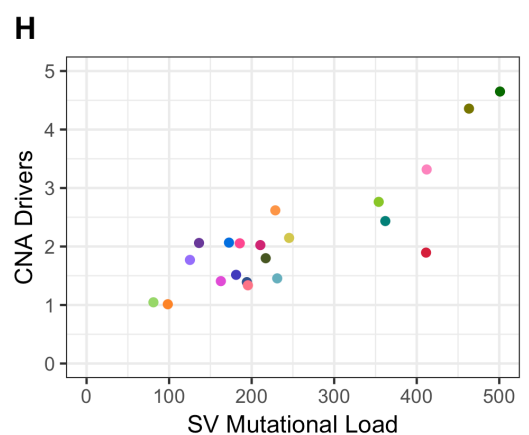

Supplement: Supplementary file [file media-3.pdf]
